# Supplementary material for: Dynamic hydroxymethylation of deoxyribonucleic acid marks differentiation-associated enhancers
Source: PubMed Central journal article supplement — Nucleic Acids Res. 2012 Jun 21;40(17):8255–65. doi: 10.1093/nar/gks595 (PMC3458548; doi:10.1093/nar/gks595), 2012-06-21
Supplement: supp_gks595_nar-01065-v-2012-File004.pdf [file supp_gks595_nar-01065-v-2012-File004.pdf]

Supplementary Table 1: List of antibodies and primers used in this study.

ChIP and hMeDIP Antibodies

|          |                       |
|----------|-----------------------|
| H3K4me2  | Millipore, 05-1338    |
| H3K27me3 | Upstate, 07-449       |
| H3K27Ac  | Abcam, ab4729         |
| 5hmC     | Diagenode, CS-HMC-100 |
| Meis1    | Abcam, ab19867        |
| Tet1     | Millipore, 09-872     |

RT-qPCR primers

|               |                        |
|---------------|------------------------|
| RSP28 forward | CGATCCATCATCCGCAATG    |
| RSP28 reverse | AGCCAAGCTCAGCGCAAC     |
| TET1 forward  | GAGCCTGTTCTCGATGTGG    |
| TET1 reverse  | CAAACCCACCTGAGGCTGTT   |
| TET2 forward  | GTTGTTGTCAGGGTGAGAATC  |
| TET2 reverse  | TCTTGCTTCTGGCAAACCTACA |
| TET3 forward  | CCGGATTGAGAAGGTCATCTAC |
| TET3 reverse  | AAGATAACAATCACGGCGTTCT |

ChIP/hmedip-qPCR primers

|                          |                       |
|--------------------------|-----------------------|
| Hus1 promoter forward    | GGGGGAACCTTTGTCCTG    |
| Hus1 promoter reverse    | ACAAAAGTCCCTCCCTGAGC  |
| Negative control forward | ACCTCAGCAGAAGGAAGCAA  |
| Negative control reverse | GCTGGGATCTCTATGCCTCA  |
| R1 forward               | AGAGCGAACCGAGAAATCAA  |
| R1 reverse               | AGAGCCTCTATTTGCCACGA  |
| R2 forward               | GACCTGAGCGCACAGTAACA  |
| R2 reverse               | ATGAAGCTGCCTTTTGAGGA  |
| R3 forward               | CCGCATTATGAACACACTCG  |
| R3 reverse               | GCTCTCCCAGGGGTAATAGG  |
| R4 forward               | ACATTCCCCAGACAAGCAAG  |
| R4 reverse               | CACTGACTGTCATCCCCTCA  |
| R5 forward               | CCGAGTGTTCTCCACCTAA   |
| R5 reverse               | ATTTGCATACAGGCGGAGTC  |
| ad_371 forward           | CGACCATCAGCTCAGAACCT  |
| ad_371 reverse           | TCCTGCTCCCTAAGGATTCAT |
| mac_1334 forward         | AGTCCTCCATCCCATTTCT   |
| mac_1334 reverse         | GAAACAGCCAGAGCACTTCC  |
| ad_5693 forward          | GTAAGGGGGTGGCCTGATAG  |
| ad_5693 reverse          | ATTCCCTTCTCCCACCAAGT  |
| ad_6850 forward          | TGTGCAAGACTGGGAAACAC  |
| ad_6850 reverse          | AGCTTCAGGACTGTGTGCAA  |
| ad_11983 forward         | AGACCCTGGGGCTAAAGAAA  |
| ad_11983 reverse         | CCTGACTCGAACTCCCTCAA  |
| CD36_E2 forward          | GCAGGAAGGGAGTGACACAT  |
| CD36_E2 reverse          | ATTGCACAAGGCACACAAAG  |
| NR5A2pro_CGI forward     | GCAGGCCTGGCATATTTTAT  |
| NR5A2pro_CGI reverse     | GGAGAAGACCGGAGGAGAAC  |

Recombination cloning primers

|            |                                          |
|------------|------------------------------------------|
| R1 forward | ATTAAAAGGAATTCCTGCAGCAAGCCTAGGTTGCTTGACC |
| R1 reverse | GCTCTTCTCCACTAGTGGACCTTCAGGCACATTGAT     |

R2 forward ATTAAAAGGAATTCCTGCAGCTGGGAGGGTTGATAAAGCA  
R2 reverse GCTCTTCTCCACTAGTAACAGATGCACATGGAAGAGA

Ligation cloning primers

R3 forward AACTGCAGTGCCTTCCAGACCAAAATTC  
R3 reverse GACTAGTACCGACCCTCAAAAATAGGC  
R4 forward AACTGCAGTTGAGGCTACTTCTGGCACA  
R4 reverse GACTAGTGCCTCTGCCACTGTTTCTG  
R5 forward AACTGCAGATAAACATGAGGCCCGTGAG  
R5 reverse GACTAGTGGTTGATTGCCAGCTTTGTT
