# Supplementary material for: Dynamic hydroxymethylation of deoxyribonucleic acid marks differentiation-associated enhancers
Source: PubMed Central journal article supplement — Nucleic Acids Res. 2012 Jun 21;40(17):8255–65. doi: 10.1093/nar/gks595 (PMC3458548; doi:10.1093/nar/gks595), 2012-06-21
Supplement: supp_gks595_nar-01065-v-2012-File005.pdf [file supp_gks595_nar-01065-v-2012-File005.pdf]

Supplementary Table 2: List of genes significantly affected upon P19 cell differentiation

| ID          | CHROMOSOME | START     | STOP      | Gene name   | Signal ratio | (+ raw p value) | BH corrected p value |
|-------------|------------|-----------|-----------|-------------|--------------|-----------------|----------------------|
| BC049949    | chr5       | 89000183  | 89007103  | Csnk        | 541,739947   | 3,01E-05        | 0,00083399           |
| BC011063    | chr6       | 52131879  | 52133994  | Hoxa5       | 476,636844   | 6,63E-06        | 0,00053713           |
| BC023689    | chr11      | 18784623  | 18918961  | Meis1       | 324,890557   | 4,99E-07        | 0,00029564           |
| BC059246    | chr6       | 84537601  | 84559566  | Cyp26b1     | 265,056602   | 0,00020835      | 0,00156644           |
| NM_175475   | chr6       | 84537601  | 84559404  | Cyp26b1     | 233,911665   | 0,0001645       | 0,00142787           |
| NM_009697   | chr7       | 70226951  | 70234106  | Nr2f2       | 193,910888   | 8,37E-05        | 0,00112072           |
| BC103595    | chr11      | 96119681  | 96121838  | Hoxb5       | 188,905383   | 2,84E-05        | 0,00082754           |
| NM_010461   | chr11      | 96097994  | 96101415  | Hoxb8       | 170,22353    | 0,00025454      | 0,00171473           |
| BC026553    | chr14      | 102702310 | 102730081 | Ednrb       | 170,18971    | 1,08E-05        | 0,00056386           |
| NM_008259   | chr12      | 58458642  | 58464133  | Foxa1       | 169,618533   | 3,60E-06        | 0,00049484           |
| NM_010459   | chr11      | 96134356  | 96136690  | Hoxb4       | 164,877798   | 2,17E-05        | 0,00069665           |
| NM_010453   | chr6       | 52131336  | 52134170  | Hoxa5       | 157,78541    | 0,00030518      | 0,00185853           |
| BC058264    | chr18      | 84146755  | 84146755  | Tshz1       | 141,590435   | 6,28E-05        | 0,00102744           |
| AK220545    | chr18      | 84146768  | 84220597  | Tshz1       | 140,447779   | 4,41E-05        | 0,00089819           |
| NM_010449   | chr6       | 52084949  | 52087900  | Hoxa1       | 139,194333   | 2,28E-08        | 0,00013602           |
| NM_175730   | chr15      | 102842041 | 102845463 | Hoxc5       | 135,903613   | 1,26E-05        | 0,00059498           |
| NM_008268   | chr11      | 96119601  | 96122210  | Hoxb5       | 134,369324   | 6,35E-05        | 0,00102744           |
| NM_010452   | chr6       | 52098644  | 52130525  | Hoxa3       | 125,974391   | 1,29E-05        | 0,00059696           |
| XM_888252   | chr18      | 84145819  | 84220755  | Tshz1       | 125,287905   | 0,00011055      | 0,00122629           |
| NM_175261   | chr6       | 52107080  | 52110434  | 5730596B20R | 113,751098   | 1,33E-05        | 0,00060231           |
| NM_080858   | chrX       | 91672917  | 91680848  | Asb12       | 106,614018   | 0,0008555       | 0,00304143           |
| BC018397    | chr3       | 88034661  | 88039299  | Crabp2      | 104,523486   | 8,31E-05        | 0,00112072           |
| BC019852    | chr11      | 75226225  | 75238728  | Serpinf1    | 101,949908   | 3,93E-05        | 0,000881             |
| NM_007759   | chr3       | 88034619  | 88039299  | Crabp2      | 101,63358    | 2,27E-05        | 0,00071887           |
| NM_010451   | chr6       | 52092093  | 52094414  | Hoxa2       | 95,1676934   | 1,32E-06        | 0,00035401           |
| AK168684    | chr11      | 18780678  | 18918964  | Meis1       | 88,8838868   | 6,94E-07        | 0,00029564           |
| D61689      | chr7       | 115267873 | 115592754 | Sox6        | 88,6109653   | 3,36E-05        | 0,00083399           |
| NM_025684   | chr10      | 52080022  | 52093019  | 5730521E12R | 79,3796154   | 0,00152505      | 0,00419971           |
| NM_010518   | chr1       | 72791271  | 72808072  | Igfbp5      | 76,9952034   | 0,00010648      | 0,00120915           |
| NM_00103378 | chr11      | 96151522  | 96158198  | LOC544810   | 76,6567007   | 0,00022162      | 0,00161725           |
| BC107172    | chr6       | 52119829  | 52121286  | Hoxa4       | 76,3676646   | 5,22E-05        | 0,00096652           |
| NM_008987   | chr3       | 66307811  | 66313734  | Ptx3        | 74,7184868   | 1,43E-05        | 0,00060233           |
| BC011532    | chr19      | 58288859  | 58507790  | Gfra1       | 73,4829004   | 0,00014305      | 0,00135008           |
| AY878193    | chr10      | 87289056  | 87360692  | Igf1        | 72,6810152   | 3,09E-05        | 0,00083399           |
| NM_022983   | chr3       | 146158370 | 146223572 | Edg7        | 68,8000003   | 6,35E-05        | 0,00102744           |
| AB008175    | chr11      | 83667243  | 83721201  | Tcf2        | 66,3683422   | 0,00026923      | 0,00175615           |
| NM_010279   | chr19      | 58289941  | 58507790  | Gfra1       | 66,0504583   | 5,10E-05        | 0,00095622           |
| NM_010458   | chr11      | 96159858  | 96162597  | Hoxb3       | 65,4466148   | 0,00031142      | 0,00186975           |
| NM_008265   | chr6       | 52119269  | 52121286  | Hoxa4       | 63,6606508   | 8,03E-05        | 0,0011108            |
| NM_00102983 | chr3       | 132819988 | 132887597 | Npnt        | 63,4895245   | 6,28E-06        | 0,00053609           |
| NM_009344   | chr10      | 110910395 | 110912758 | Phlda1      | 62,61342     | 0,00101249      | 0,00336247           |
| NM_030703   | chr19      | 44009617  | 44039831  | Cpn1        | 62,3369933   | 3,84E-06        | 0,00049484           |
| BC108408    | chr13      | 78653010  | 78662418  | Nr2f1       | 61,3836842   | 0,0004286       | 0,0021803            |
| NM_00102556 | chr7       | 115262492 | 115822196 | Sox6        | 60,9553101   | 2,33E-05        | 0,00073043           |
| NM_011859   | chr12      | 9600504   | 9606919   | Osr1        | 60,768004    | 0,00026496      | 0,00175133           |
| NM_007384   | chr11      | 80696374  | 80969098  | Accn1       | 60,3336099   | 3,31E-05        | 0,00083399           |
| NM_007904   | chr14      | 102700304 | 102729375 | Ednrb       | 57,7792671   | 1,28E-05        | 0,00059696           |
| BC050063    | chr17      | 79616918  | 79623367  | Cyp1b1      | 56,8563665   | 0,0003379       | 0,00194858           |
| BC038551    | chr11      | 80967348  | 80968996  | Accn1       | 56,1734562   | 3,76E-06        | 0,00049484           |
| BC014692    | chr19      | 44009622  | 44039799  | Cpn1        | 55,1164094   | 0,00027068      | 0,00176176           |
| BC057447    | chr1       | 72794948  | 72808072  | Igfbp5      | 53,8495855   | 0,00014637      | 0,0013617            |
| NM_022723   | chr15      | 83432764  | 83552672  | Scube1      | 51,0123032   | 1,01E-05        | 0,00056386           |
| NM_201518   | chr12      | 96088084  | 96176856  | Flrt2       | 50,8021154   | 5,82E-05        | 0,00101087           |
| BC096471    | chr12      | 96088088  | 96176932  | Flrt2       | 50,7935475   | 0,0001137       | 0,00123697           |
| BC085324    | chr6       | 113604312 | 113660787 | Irak2       | 50,4038955   | 1,29E-06        | 0,00035401           |
| AK155549    | chr2       | 9775630   | 9796453   | Gata3       | 49,3951219   | 0,00094597      | 0,00324502           |
| AK078062    | chr6       | 113604304 | 113660786 | Irak2       | 48,741655    | 2,79E-06        | 0,00048602           |
| NM_008091   | chr2       | 9774930   | 9795629   | Gata3       | 48,4651787   | 0,00042527      | 0,00216706           |
| NM_007752   | chr3       | 20149329  | 20184741  | Cp          | 47,5684573   | 0,00054707      | 0,00241621           |
| NM_010466   | chr15      | 102818572 | 102821404 | Hoxc8       | 47,137282    | 2,06E-05        | 0,00069309           |
| NM_172161   | chr6       | 113604279 | 113660528 | Irak2       | 45,9307998   | 7,32E-08        | 0,00021816           |
| NM_008781   | chr1       | 77985838  | 78080283  | Pax3        | 44,5593619   | 0,00497058      | 0,00886202           |
| NM_009291   | chr9       | 57927485  | 57952090  | Stra6       | 44,4936228   | 1,03E-05        | 0,00056386           |
| BC080278    | chr15      | 83432778  | 83552773  | Scube1      | 44,1363881   | 4,39E-05        | 0,00089714           |
| NM_021279   | chr15      | 98617890  | 98621864  | Wnt1        | 43,8320222   | 0,00210693      | 0,00501057           |
| BC103605    | chr11      | 96181850  | 96183721  | Hoxb1       | 43,644461    | 1,86E-05        | 0,00066248           |
| NM_009930   | chr1       | 45256191  | 45293566  | Col3a1      | 43,6313538   | 0,00087415      | 0,00308382           |
| XM_977521   | chr12      | 58581045  | 58655916  | LOC639426   | 43,5833947   | 4,97E-05        | 0,0009513            |
| NM_053195   | chr2       | 144934051 | 145333394 | Slc24a3     | 43,2337678   | 0,00014012      | 0,00134116           |
| BC025189    | chr11      | 83669154  | 83722014  | Tcf2        | 42,9656952   | 0,00041364      | 0,00212047           |
| NM_013553   | chr15      | 102862428 | 102864631 | Hoxc4       | 42,6388513   | 1,90E-05        | 0,00066893           |
| BC058710    | chr2       | 134477637 | 135164359 | Plcb1       | 41,174427    | 0,00021866      | 0,00160745           |
| BC010765    | chr11      | 62947732  | 62975741  | Pmp22       | 40,1654555   | 9,70E-05        | 0,00115857           |

|             |       |           |           |             |            |            |            |
|-------------|-------|-----------|-----------|-------------|------------|------------|------------|
| NM_134032   | chr11 | 96167721  | 96170102  | Hoxb2       | 39,9657798 | 0,00037652 | 0,00204961 |
| XM_976121   | chr6  | 40558437  | 40628504  | LOC665323   | 38,9821025 | 7,93E-05   | 0,00109928 |
| S68107      | chr11 | 84335665  | 84341360  | Lhx1        | 38,7977209 | 5,84E-07   | 0,00029564 |
| BC060129    | chr8  | 131245382 | 131389448 | Nrp1        | 37,1560869 | 3,15E-06   | 0,00048602 |
| NM_008269   | chr11 | 96115260  | 96117659  | Hoxb6       | 36,6040151 | 0,00049334 | 0,00233471 |
| NM_007865   | chr17 | 15072316  | 15080550  | Dll1        | 36,5417376 | 1,76E-05   | 0,00064214 |
| BC103597    | chr11 | 96181850  | 96183721  | Hoxb1       | 36,3640253 | 0,00011802 | 0,00126326 |
| NM_007603   | chrX  | 139048603 | 139073663 | Capn6       | 36,1459808 | 0,00112543 | 0,00035514 |
| AF457142    | chr2  | 105469768 | 105497308 | Pax6        | 36,0625623 | 0,00091334 | 0,00315672 |
| NM_008498   | chr11 | 84335573  | 84341729  | Lhx1        | 34,7771226 | 7,80E-07   | 0,00030399 |
| NM_030244   | chr2  | 30293546  | 30296228  | Ier5l       | 33,8005152 | 1,54E-05   | 0,00062615 |
| X75926      | chr4  | 53054038  | 53165178  | Abca1       | 33,7525984 | 0,00014062 | 0,00134137 |
| BC066066    | chr15 | 83434271  | 83552763  | Scube1      | 33,5795269 | 3,46E-05   | 0,00083399 |
| NM_019677   | chr2  | 134477970 | 135163863 | Plcb1       | 33,4162206 | 0,00019051 | 0,00149871 |
| NM_008026   | chr9  | 32171772  | 32290933  | Fli1        | 33,2852246 | 0,00034043 | 0,00195912 |
| AK159219    | chr8  | 131245373 | 131389453 | Nrp1        | 33,2786115 | 4,08E-06   | 0,00049484 |
| NM_010658   | chr2  | 160055201 | 160058455 | Mafb        | 33,2759204 | 0,00020095 | 0,00153024 |
| BC067407    | chr7  | 115265620 | 115615856 | Sox6        | 33,1253395 | 6,79E-07   | 0,00029564 |
| NM_008885   | chr11 | 62947704  | 62975741  | Pmp22       | 32,9226829 | 8,99E-05   | 0,00112306 |
| NM_177161   | chr7  | 100159602 | 100193063 | P4ha3       | 32,5761303 | 0,000129   | 0,00131739 |
| NM_009994   | chr17 | 79615278  | 79623367  | Cyp1b1      | 32,075281  | 0,00095003 | 0,00324829 |
| D11329      | chr15 | 102862749 | 102864875 | Hoxc4       | 31,8964362 | 7,00E-05   | 0,00105565 |
| NM_146090   | chr18 | 84222350  | 84231707  | Zadhd       | 31,6943403 | 9,56E-05   | 0,00115577 |
| NM_013627   | chr2  | 105477283 | 105497108 | Pax6        | 31,5059702 | 0,00059702 | 0,0025302  |
| BC028805    | chr10 | 101941972 | 101975884 | Pamci       | 31,1159704 | 6,16E-05   | 0,00102496 |
| NM_008086   | chr13 | 60184027  | 60186988  | Gas1        | 30,7946253 | 0,00012732 | 0,00131698 |
| NM_170599   | chr16 | 38821676  | 38946491  | Igfsf11     | 30,7480568 | 5,69E-05   | 0,00100585 |
| NM_031180   | chr5  | 65627545  | 65663138  | Klb         | 30,6970901 | 0,0012812  | 0,00383096 |
| BC082538    | chr7  | 100159602 | 100193777 | P4ha3       | 30,492376  | 0,00015722 | 0,00140113 |
| BC057980    | chr12 | 57631547  | 58115308  | Slc25a21    | 30,3187142 | 0,0006568  | 0,00266582 |
| BC054812    | chr1  | 72791271  | 72807482  | Igfbp5      | 30,1516142 | 0,00192028 | 0,00479599 |
| BC053082    | chr4  | 153164098 | 153480608 | Prdm16      | 29,879208  | 0,00029727 | 0,00183867 |
| AK086468    | chr7  | 100167891 | 100193781 | P4ha3       | 29,8147293 | 0,00019482 | 0,0015124  |
| NM_00103401 | chr11 | 80696366  | 80787809  | Accn1       | 29,3775735 | 0,0002382  | 0,0016811  |
| NM_010460   | chr11 | 96102735  | 96106253  | Hoxb7       | 29,2607194 | 0,00288094 | 0,00611033 |
| NM_008737   | chr8  | 131228922 | 131389437 | Nrp1        | 29,2103958 | 7,36E-06   | 0,00053713 |
| XM_981216   | chr4  | 113904619 | 114108672 | LOC666048   | 29,1898185 | 8,85E-05   | 0,00112072 |
| AK041590    | chr15 | 83434271  | 83552787  | Scube1      | 28,7896165 | 3,14E-05   | 0,00083399 |
| BC023953    | chr11 | 112598324 | 112601994 | Sox9        | 28,5021728 | 8,68E-05   | 0,00112072 |
| NM_007730   | chr9  | 79387442  | 79504149  | Col12a1     | 28,1926398 | 0,00097305 | 0,0033056  |
| BC023796    | chr11 | 112598322 | 112602246 | Sox9        | 28,0288374 | 0,00011005 | 0,00122629 |
| NM_027504   | chr4  | 153164091 | 153372731 | Prdm16      | 27,638805  | 0,00066402 | 0,00267725 |
| NM_00103861 | chr14 | 96669980  | 97052677  | Dach1       | 26,3384766 | 0,0002655  | 0,00175295 |
| BC035535    | chr2  | 82057604  | 82060715  | C630007C17R | 26,2440778 | 0,00083098 | 0,00299534 |
| BC100404    | chr10 | 117032497 | 117088295 | Pgm3        | 26,0573777 | 1,63E-05   | 0,00063799 |
| AK033517    | chr3  | 30142379  | 30331261  | Evi1        | 25,9431184 | 0,00072757 | 0,00279097 |
| AK148310    | chr10 | 21902068  | 21905974  | N/A         | 25,4967242 | 0,00129106 | 0,00384063 |
| NM_178382   | chr2  | 140349639 | 140362910 | Flrt3       | 25,4718764 | 0,00010768 | 0,00121439 |
| NM_153778   | chr6  | 72135685  | 72165086  | Atoh8       | 24,7657316 | 6,18E-05   | 0,00102496 |
| BC107008    | chr15 | 12978928  | 13036602  | Cdh6        | 24,7594953 | 7,22E-05   | 0,00106331 |
| NM_010262   | chr1  | 91759132  | 91762347  | Gbx2        | 24,6686467 | 0,0010463  | 0,00340917 |
| NM_007833   | chr10 | 96912054  | 96947839  | Dcn         | 24,6005728 | 0,00084785 | 0,0030287  |
| BC026686    | chr18 | 42771243  | 43184740  | Ppp2r2b     | 24,4230251 | 0,00016153 | 0,00142469 |
| BC018517    | chr7  | 89384295  | 89402367  | Prss23      | 24,1881188 | 0,00040293 | 0,00209367 |
| XM_00105207 | chr11 | 96168890  | 96170106  | Hoxb2       | 24,1316836 | 8,45E-05   | 0,00112072 |
| NM_010789   | chr11 | 18780430  | 18918683  | Meis1       | 24,0939663 | 4,39E-05   | 0,00089714 |
| NM_007666   | chr15 | 12978924  | 13036602  | Cdh6        | 23,4979555 | 1,71E-05   | 0,00063799 |
| AK018119    | chr18 | 42771275  | 43024984  | Ppp2r2b     | 23,3343493 | 0,00052766 | 0,00238689 |
| NM_011243   | chr14 | 15224105  | 15368477  | Rarb        | 23,1868779 | 0,00026909 | 0,00175615 |
| NM_010151   | chr13 | 78652523  | 78662420  | Nr2f1       | 23,0229373 | 0,00592781 | 0,00996942 |
| BC086926    | chr18 | 20808422  | 20816892  | Ttr         | 22,8189948 | 0,00022446 | 0,00162319 |
| NM_028392   | chr18 | 42771243  | 43184802  | Ppp2r2b     | 22,7952817 | 5,77E-05   | 0,00101087 |
| BC005569    | chr14 | 50013153  | 50027581  | Rnase4      | 22,7876461 | 0,00148986 | 0,00414491 |
| AK050798    | chr15 | 102837828 | 102839915 | Hoxc6       | 22,7794867 | 8,92E-05   | 0,00112072 |
| NM_008266   | chr11 | 96181847  | 96183766  | Hoxb1       | 22,6739421 | 1,68E-05   | 0,00063799 |
| BC066111    | chr11 | 92914503  | 93417363  | Car10       | 22,6718467 | 0,00184689 | 0,00468341 |
| NM_010258   | chr18 | 11052505  | 11085628  | Gata6       | 22,6382416 | 3,00E-05   | 0,00083399 |
| NM_177156   | chr5  | 77730703  | 77733060  | A730089K16R | 22,3467016 | 0,00029358 | 0,00183181 |
| XM_110852   | chr1  | 61573518  | 62572199  | Als2cr19    | 22,2348896 | 3,28E-05   | 0,00083399 |
| NM_022814   | chr4  | 58136849  | 58300650  | Svep1       | 22,1918289 | 0,0001775  | 0,00146575 |
| NM_007963   | chr3  | 30143788  | 30188737  | Evi1        | 22,1875223 | 0,00047256 | 0,00229442 |
| AK141669    | chr15 | 98618036  | 98621863  | Wnt1        | 22,1797316 | 0,00107779 | 0,00346662 |
| XM_983221   | chr8  | 28441488  | 28447402  | Zfp703      | 22,0062284 | 1,68E-05   | 0,00063799 |
| AY523601    | chr4  | 137727261 | 137730219 | Camk2n1     | 21,890151  | 0,00013815 | 0,00133931 |
| XM_896183   | chrX  | 98052103  | 98152354  | LOC621083   | 21,6810592 | 4,84E-05   | 0,00093602 |
| BC052043    | chr2  | 140350760 | 140362892 | Flrt3       | 21,6508236 | 5,12E-07   | 0,00029564 |

|             |       |           |           |              |            |            |            |
|-------------|-------|-----------|-----------|--------------|------------|------------|------------|
| AJ001482    | chr3  | 30143854  | 30188775  | Evi1         | 21,4984389 | 0,00059706 | 0,0025302  |
| NM_008872   | chr8  | 24223312  | 24248389  | Plat         | 21,3665687 | 7,15E-05   | 0,00105819 |
| NM_021472   | chr14 | 50013146  | 50027939  | Rnase4       | 21,3258302 | 0,00114514 | 0,00359522 |
| XM_355438   | chr3  | 19836610  | 19883750  | Trim55       | 21,1495735 | 0,00011249 | 0,00123072 |
| BC018484    | chr14 | 20772514  | 20776414  | Zfp503       | 20,9817048 | 0,00016697 | 0,0014314  |
| NM_133501   | chr2  | 29016829  | 29070049  | Ntnq2        | 20,6151064 | 0,00567364 | 0,00969788 |
| NM_183261   | chr7  | 70227958  | 70240235  | Nr2f2        | 20,3565805 | 0,00129288 | 0,00384063 |
| NM_011041   | chr12 | 57613650  | 57629242  | Pax9         | 19,9817357 | 0,00094992 | 0,00324829 |
| AK141181    | chr3  | 141402985 | 141767314 | Unc5c        | 19,9194605 | 0,0001107  | 0,00122629 |
| NM_201239   | chr14 | 50018351  | 50028091  | Rnase4       | 19,8196558 | 0,00118626 | 0,00366524 |
| BC062957    | chr3  | 20149204  | 20185087  | Cp           | 19,6829333 | 0,00399365 | 0,00765554 |
| AK077574    | chr13 | 38203949  | 38206041  | Dsp          | 19,6694312 | 5,88E-06   | 0,00053609 |
| BC107240    | chrX  | 165120529 | 165123662 | 4933400A11R  | 19,4960957 | 8,97E-05   | 0,00112292 |
| XM_620516   | chr7  | 82743116  | 82747761  | Rkhd3        | 19,3652739 | 2,15E-05   | 0,00069344 |
| NM_207246   | chr17 | 75370672  | 75434104  | Rasgrp3      | 19,1474894 | 4,58E-05   | 0,00091118 |
| XM_901310   | chr1  | 61573518  | 62572199  | Als2cr19     | 19,1422255 | 8,79E-05   | 0,00121207 |
| NM_010512   | chr10 | 87289199  | 87361600  | Igf1         | 19,1008729 | 5,82E-05   | 0,00101087 |
| BC057172    | chr11 | 99244508  | 99254226  | 9030623C06R  | 19,0595656 | 0,00104146 | 0,00340417 |
| NM_177875   | chr5  | 111821724 | 111828248 | C130026L21Ri | 19,0071458 | 0,00576921 | 0,00978272 |
| AK163997    | chr10 | 22092298  | 22096886  | N/A          | 18,9266871 | 0,00162562 | 0,00053609 |
| NM_172298   | chr7  | 36406877  | 36482217  | Tshz3        | 18,8587219 | 0,00123627 | 0,00374691 |
| NM_010426   | chr8  | 123970450 | 123972856 | Foxf1a       | 18,7781973 | 0,0007257  | 0,00278778 |
| NM_027531   | chr18 | 42771241  | 43024962  | Ppp2r2b      | 18,7596803 | 0,00016557 | 0,00143051 |
| BC096546    | chr7  | 73812634  | 73887187  | St8sia2      | 18,7274167 | 0,00012913 | 0,00131739 |
| AK049380    | chr10 | 51366195  | 51410323  | Rfxdc1       | 18,678888  | 4,00E-06   | 0,00049484 |
| NM_028296   | chr11 | 92914499  | 93417363  | Car10        | 18,6327236 | 0,00387719 | 0,00748085 |
| NM_030676   | chr1  | 138660686 | 138776859 | Nr5a2        | 18,6111677 | 0,0011865  | 0,00366524 |
| NM_009643   | chr19 | 9056328   | 9086240   | Ahnak        | 18,5767128 | 0,00380602 | 0,00738296 |
| AK156757    | chr15 | 31238683  | 31312315  | 5730557B15R  | 18,4303726 | 2,25E-06   | 0,00044812 |
| BC008277    | chr8  | 80560126  | 80620508  | Ednra        | 18,3298533 | 0,00065453 | 0,00266481 |
| NM_008878   | chr11 | 75247930  | 75255676  | Serpinf2     | 18,322528  | 3,95E-05   | 0,00088167 |
| BC017606    | chr11 | 92916187  | 93417358  | Car10        | 18,2664368 | 0,00346185 | 0,00687068 |
| AK033500    | chr6  | 52144080  | 52147057  | Hoxa7        | 17,9811078 | 0,00053924 | 0,00240299 |
| NM_010195   | chr10 | 114855735 | 114991603 | Lgr5         | 17,9639163 | 0,00493381 | 0,0088255  |
| BC058952    | chr14 | 20772725  | 20776330  | Zfp503       | 17,958231  | 0,00031413 | 0,00187846 |
| NM_00102987 | chr1  | 38739054  | 38765761  | Lonrf2       | 17,8512105 | 0,00018301 | 0,00147849 |
| XM_898908   | chr13 | 90184151  | 90216773  | Cspg2        | 17,8323302 | 0,00216274 | 0,00508047 |
| XM_888896   | chr6  | 22825502  | 23002917  | Ptprz1       | 17,7807384 | 1,54E-05   | 0,00062615 |
| NM_009181   | chr7  | 73812633  | 73887174  | St8sia2      | 17,7357283 | 3,50E-05   | 0,00083399 |
| NM_023256   | chr11 | 99244492  | 99254243  | 9030623C06R  | 17,7276574 | 0,00209569 | 0,00500841 |
| NM_145459   | chr14 | 20772513  | 20778153  | Zfp503       | 17,7228658 | 0,00025778 | 0,0017307  |
| NM_026346   | chr15 | 58010161  | 58044957  | Fbxo32       | 17,6385492 | 3,15E-06   | 0,00048602 |
| BC008980    | chr4  | 144159513 | 144194328 | Dhrs3        | 17,5456724 | 1,08E-05   | 0,00056386 |
| NM_009330   | chr11 | 83667243  | 83721542  | Tcf2         | 17,3743448 | 0,00012827 | 0,00131739 |
| NM_010514   | chr7  | 142460157 | 142468879 | Igf2         | 17,3451851 | 5,84E-06   | 0,00053609 |
| XM_894542   | chr18 | 59300708  | 59536705  | 4833446K15R  | 17,2789063 | 0,00018833 | 0,00149633 |
| BC110666    | chr8  | 48238589  | 48346264  | Irf2         | 17,2441686 | 0,00026879 | 0,00175615 |
| BC053489    | chr7  | 142460158 | 142466857 | Igf2         | 17,0689609 | 2,57E-05   | 0,00079427 |
| BC002049    | chr7  | 128038125 | 128044854 | Tgfb1i1      | 17,06833   | 0,00031053 | 0,00186879 |
| NM_175549   | chr16 | 73802885  | 74293900  | Robo2        | 16,9791226 | 0,00142389 | 0,00405022 |
| NM_024124   | chr12 | 34956743  | 35114121  | Hdac9        | 16,9467102 | 0,0007111  | 0,00278211 |
| AK164239    | chr3  | 141402985 | 141766808 | Unc5c        | 16,94166   | 0,0003498  | 0,00198806 |
| NM_008524   | chr10 | 96995517  | 97002392  | Lum          | 16,8190774 | 0,00053488 | 0,00240012 |
| NM_010791   | chr11 | 101693599 | 101710444 | Meox1        | 16,7831312 | 0,00075908 | 0,00286538 |
| NM_00103332 | chr9  | 48406263  | 48587864  | Zbtb16       | 16,7458302 | 7,88E-06   | 0,00054651 |
| AK051098    | chr3  | 30175033  | 30204134  | Evi1         | 16,6842315 | 7,25E-05   | 0,00106513 |
| NM_011170   | chr1  | 69470597  | 69619029  | Zfpn1a2      | 16,6806469 | 0,00019672 | 0,00151829 |
| NM_008391   | chr8  | 48238591  | 48346275  | Irf2         | 16,3863959 | 0,00012899 | 0,00131739 |
| AK171589    | chr7  | 30574590  | 30586889  | Cd22         | 16,382913  | 5,01E-05   | 0,00095198 |
| NM_207650   | chr18 | 23558451  | 23802724  | Dtna         | 16,3774632 | 8,61E-05   | 0,00112072 |
| NM_018780   | chr19 | 42251281  | 42255442  | Sfrp5        | 16,3719017 | 0,00598932 | 0,01005585 |
| DQ143896    | chr7  | 128039165 | 128044859 | Tgfb1i1      | 16,3672118 | 0,00055908 | 0,00244012 |
| BC010262    | chr5  | 17294906  | 17361568  | Cd36         | 16,3534524 | 0,00317762 | 0,00650584 |
| BC098489    | chr18 | 52893462  | 53041300  | Sncap        | 16,3511855 | 0,00045515 | 0,00225759 |
| DQ143893    | chr7  | 128038143 | 128044859 | Tgfb1i1      | 16,2635091 | 0,00018859 | 0,00149633 |
| BC024960    | chr2  | 30712990  | 30725265  | Ptges        | 16,2520147 | 9,94E-05   | 0,00116936 |
| AK033222    | chr16 | 77383097  | 77481123  | 2810055G20R  | 16,1047013 | 0,00185252 | 0,00468791 |
| BC048699    | chr1  | 77985860  | 78079954  | Pax3         | 16,0705047 | 0,00531308 | 0,00927597 |
| AK034251    | chr4  | 49080377  | 49359067  | E130309F12Ri | 16,0604825 | 0,00013243 | 0,00133144 |
| NM_009365   | chr7  | 128038018 | 128044860 | Tgfb1i1      | 16,0415688 | 0,00036019 | 0,00201118 |
| NM_009845   | chr7  | 30574588  | 30589027  | Cd22         | 15,9479602 | 0,00015206 | 0,00138265 |
| NM_00100534 | chr11 | 86756774  | 86788204  | Ypel2        | 15,8849649 | 4,56E-05   | 0,00091118 |
| BC010972    | chr4  | 144159836 | 144194328 | Dhrs3        | 15,8301169 | 1,77E-06   | 0,00042109 |
| BC027211    | chr15 | 58010887  | 58044909  | Fbxo32       | 15,8289465 | 9,99E-06   | 0,00056194 |
| XM_986499   | chr13 | 78662584  | 78663804  | LOC666856    | 15,8227304 | 0,00446708 | 0,00821745 |
| DQ143894    | chr7  | 128038143 | 128044859 | Tgfb1i1      | 15,7948245 | 0,0004096  | 0,00211801 |

|              |       |           |           |              |            |            |            |
|--------------|-------|-----------|-----------|--------------|------------|------------|------------|
| NM_011855    | chrX  | 38777017  | 39519413  | Odz1         | 15,6871714 | 0,00159868 | 0,00431867 |
| NM_022415    | chr2  | 30711479  | 30725306  | Ptges        | 15,670761  | 3,76E-05   | 0,00087714 |
| AK019477     | chr18 | 23558499  | 23802716  | Dtna         | 15,6592151 | 0,00038511 | 0,00206033 |
| BC096762     | chr4  | 49080585  | 49359868  | E130309F12Ri | 15,5522707 | 0,00058096 | 0,00250268 |
| NM_152804    | chr13 | 111515939 | 111521722 | Plk2         | 15,5453012 | 0,00045697 | 0,0022628  |
| BC106190     | chr10 | 21862914  | 22063553  | Raet1d       | 15,4072058 | 8,99E-06   | 0,00054925 |
| AK054179     | chr13 | 41322091  | 41369970  | Nedd9        | 15,2116    | 0,00039721 | 0,00207551 |
| XM_986046    | chr14 | 44187202  | 44201130  | Gm908        | 15,2035185 | 0,00059166 | 0,00252539 |
| NM_025956    | chr14 | 48148308  | 48167351  | 1700011H14R  | 15,0578442 | 0,00209669 | 0,00500841 |
| NM_009177    | chr15 | 66932543  | 66943661  | St3gal1      | 15,046298  | 3,92E-05   | 0,000881   |
| NM_010231    | chr1  | 164666235 | 164703223 | Fmo1         | 15,0185123 | 0,00276037 | 0,00594035 |
| NM_020030    | chr10 | 22051689  | 22063421  | Raet1d       | 14,9203899 | 3,77E-05   | 0,00087714 |
| AK034012     | chr18 | 60719352  | 60725806  | Synpo        | 14,8831363 | 0,00137967 | 0,0039814  |
| X95379       | chr10 | 99445673  | 99525756  | Kitl         | 14,8392198 | 8,71E-05   | 0,00112072 |
| AK162604     | chr11 | 87986179  | 88001550  | Cuedc1       | 14,8308906 | 0,00043858 | 0,00221035 |
| XM_488510    | chr13 | 90129513  | 90216716  | Spcg2        | 14,8045288 | 0,00144225 | 0,00406944 |
| AJ000504     | chr2  | 115554534 | 115756488 | Mrg1         | 14,7847711 | 1,37E-06   | 0,00035401 |
| NM_009050    | chr6  | 118119471 | 118162752 | Ret          | 14,7206894 | 6,32E-05   | 0,00102744 |
| BC005550     | chr10 | 96995510  | 97002390  | Lum          | 14,667794  | 0,00143353 | 0,00405733 |
| AK129379     | chr11 | 113594676 | 113701418 | Sdk2         | 14,633098  | 0,00028791 | 0,00181987 |
| BC053713     | chr13 | 41322307  | 41498255  | Nedd9        | 14,5467672 | 0,00049643 | 0,0023374  |
| NM_010825    | chr2  | 115554509 | 115756553 | Mrg1         | 14,3754645 | 9,06E-06   | 0,00054925 |
| BC002064     | chr6  | 36645081  | 36740082  | Ptn          | 14,36328   | 0,00206556 | 0,00497429 |
| NM_001033774 | chr12 | 58482126  | 58540121  | 4921506M07R  | 14,2401588 | 0,00015862 | 0,00140935 |
| NM_019675    | chr14 | 65298484  | 65315790  | Stmn4        | 14,188695  | 0,00017087 | 0,00144484 |
| NM_007743    | chr6  | 4455760   | 4490730   | Col1a2       | 14,1653401 | 8,49E-05   | 0,00112072 |
| AK154958     | chr18 | 60719341  | 60749668  | Synpo        | 14,1494428 | 0,00110425 | 0,00352061 |
| BC025434     | chr11 | 87915497  | 88001547  | Cuedc1       | 14,1400632 | 0,00079168 | 0,00293444 |
| AK089667     | chr15 | 31237774  | 31312121  | 5730557B15R  | 14,1233132 | 1,43E-06   | 0,00035401 |
| NM_013598    | chr10 | 99445511  | 99530100  | Kitl         | 13,973679  | 0,00013607 | 0,0013321  |
| XM_894564    | chr18 | 60719341  | 60749998  | Synpo        | 13,9507747 | 0,00065293 | 0,00266079 |
| BC011322     | chr10 | 99445541  | 99526858  | Kitl         | 13,9347962 | 0,00015194 | 0,00138265 |
| AK035282     | chr17 | 12659315  | 12661475  | D17ErtD663e  | 13,8459935 | 0,00032405 | 0,00191099 |
| AK164668     | chr14 | 115808253 | 116859353 | Gpc6         | 13,7367296 | 0,00032609 | 0,00192109 |
| NM_001033339 | chr4  | 153474493 | 153480167 | 5930403L14Ri | 13,7020198 | 0,00012391 | 0,00129382 |
| AK158513     | chr2  | 115554740 | 115755953 | Mrg1         | 13,6435137 | 3,26E-06   | 0,00048602 |
| XM_979000    | chr5  | 125816325 | 126079009 | Tmemp132b    | 13,5625511 | 0,00010101 | 0,0011774  |
| XM_989538    | chr10 | 21962592  | 21987574  | LOC667281    | 13,550179  | 0,00065228 | 0,00266    |
| NM_009017    | chr10 | 22051685  | 22063529  | Raet1b       | 13,5279688 | 0,00016391 | 0,00142787 |
| NM_010181    | chr18 | 58135626  | 58335174  | Fbn2         | 13,5188138 | 2,37E-06   | 0,00045575 |
| NM_028724    | chr2  | 145477583 | 145579054 | Rin2         | 13,4752176 | 0,00013963 | 0,00134116 |
| NM_008909    | chr16 | 5002051   | 5047742   | Ppl          | 13,4721045 | 0,00165294 | 0,00440482 |
| NM_017464    | chr13 | 41320959  | 41498261  | Nedd9        | 13,4461384 | 0,00049046 | 0,00232628 |
| AK012573     | chr7  | 70238776  | 70239870  | Nr2f2        | 13,3679531 | 0,00513165 | 0,00906722 |
| NM_011817    | chr13 | 51859188  | 51860971  | Gadd45g      | 13,3598632 | 0,00221508 | 0,00516679 |
| NM_013468    | chr19 | 36177108  | 36184988  | Ankrd1       | 13,3525804 | 0,00157515 | 0,00428034 |
| NM_133500    | chr2  | 29016829  | 29070049  | Ntnq2        | 13,2799395 | 0,00989027 | 0,01463535 |
| NM_023270    | chrX  | 134956983 | 135019499 | Rnf128       | 13,2567632 | 0,00026285 | 0,0017471  |
| BC060291     | chr16 | 94437261  | 94445428  | Dscr6        | 13,1996399 | 0,00030808 | 0,00186288 |
| BC001989     | chr13 | 51859189  | 51860968  | Gadd45g      | 13,1173101 | 0,00044954 | 0,00224095 |
| NM_080455    | chr2  | 169324880 | 169579709 | Tshz2        | 13,1127648 | 0,00055521 | 0,00243108 |
| NM_172800    | chr11 | 113596879 | 113882041 | Sdk2         | 13,0739212 | 0,00039327 | 0,00206764 |
| S82462       | chr18 | 11054038  | 11085307  | Gata6        | 13,0572575 | 0,00026787 | 0,00175615 |
| NM_001033328 | chr18 | 53589914  | 53701226  | Gm92         | 13,0390483 | 3,22E-05   | 0,00083399 |
| NM_011607    | chr4  | 63446148  | 63507087  | Tnc          | 13,0230308 | 0,01355239 | 0,01885532 |
| BC055311     | chr18 | 61170518  | 61210428  | Pdgfrb       | 13,0056206 | 0,00164999 | 0,004401   |
| Y17115       | chr10 | 22795478  | 23040202  | Eya4         | 12,9813933 | 0,00011392 | 0,00123712 |
| NM_008058    | chr18 | 9212917   | 9214975   | Fzd8         | 12,9141728 | 0,00128192 | 0,00383096 |
| AK165471     | chr10 | 87288965  | 87363066  | Igf1         | 12,8194578 | 0,00240152 | 0,00544199 |
| BC050765     | chr18 | 23640583  | 23799230  | Dtna         | 12,7937445 | 0,00052765 | 0,00238689 |
| BC060182     | chr4  | 117969122 | 117987687 | Tie1         | 12,7689678 | 0,00902674 | 0,01357884 |
| AK135776     | chr6  | 101145975 | 101343440 | Pdzrn3       | 12,7451519 | 0,00049962 | 0,00234177 |
| BC016434     | chr2  | 160056478 | 160058209 | Mafb         | 12,6681739 | 0,0007215  | 0,00278211 |
| BC039217     | chr6  | 135031378 | 135050392 | Gprc5a       | 12,6108475 | 0,00075494 | 0,00285232 |
| NM_026439    | chr16 | 45013495  | 45046996  | Ccdc80       | 12,5934064 | 9,55E-06   | 0,00055409 |
| AK011831     | chr4  | 146945303 | 146953883 | 2610109H07R  | 12,5520694 | 0,00141832 | 0,00404595 |
| BC005529     | chr2  | 145552141 | 145579053 | Rin2         | 12,528745  | 0,00012979 | 0,00131796 |
| AK034357     | chr12 | 71163146  | 71265919  | N/A          | 12,509105  | 1,44E-05   | 0,00060233 |
| NM_008270    | chr11 | 96087598  | 96091975  | Hoxb9        | 12,474701  | 0,00162655 | 0,00436096 |
| BC016250     | chr15 | 78669913  | 78678157  | Cdc42ep1     | 12,4266599 | 0,00012652 | 0,00131203 |
| BC040364     | chr18 | 23558451  | 23799608  | Dtna         | 12,3965778 | 0,00022432 | 0,00162319 |
| NM_011587    | chr4  | 117969122 | 117987993 | Tie1         | 12,3862995 | 0,00588135 | 0,00991646 |
| NM_008396    | chr13 | 115956789 | 116052919 | Itga2        | 12,3819789 | 0,00156795 | 0,00426661 |
| BC009123     | chr17 | 12584759  | 12658287  | 2810051F02Ri | 12,358428  | 3,11E-05   | 0,00083399 |
| NM_008553    | chr10 | 86920620  | 86922980  | Ascl1        | 12,2470298 | 0,01398245 | 0,01930155 |
| NM_025743    | chrX  | 165120482 | 165123740 | 4933400A11R  | 12,1611408 | 3,35E-05   | 0,00083399 |

|             |       |           |           |             |            |            |             |
|-------------|-------|-----------|-----------|-------------|------------|------------|-------------|
| NM_008809   | chr18 | 61170809  | 61210428  | Pdgfrb      | 12,1587246 | 0,00046358 | 0,00227609  |
| NM_029614   | chr7  | 89382976  | 89392744  | Prss23      | 12,130272  | 0,00273154 | 0,00590684  |
| AK048634    | chr16 | 87834452  | 88179087  | Grik1       | 12,1231553 | 0,00069866 | 0,00276589  |
| AF143543    | chr18 | 23558486  | 23777435  | Dtna        | 12,0160432 | 0,00046894 | 0,00228602  |
| NM_144557   | chr9  | 120152770 | 120323532 | Myrip       | 11,992551  | 0,00023913 | 0,0016811   |
| NM_011880   | chr1  | 176895891 | 177329065 | Rgs7        | 11,9035776 | 0,00150707 | 0,0041772   |
| NM_177306   | chr10 | 51373932  | 51418844  | Rfxdc1      | 11,8943951 | 5,97E-05   | 0,00102208  |
| NM_020259   | chr8  | 82867945  | 82954065  | Hhip        | 11,7616617 | 0,00207567 | 0,00498443  |
| NM_010051   | chr19 | 30611872  | 30615493  | Dkk1        | 11,6479164 | 0,00224028 | 0,00520114  |
| BC051383    | chr15 | 97803668  | 97832669  | Col2a1      | 11,636296  | 0,00035878 | 0,00201037  |
| NM_011769   | chr7  | 6279528   | 6300518   | Zim1        | 11,6287168 | 0,00115882 | 0,00362101  |
| BC099693    | chr15 | 66935965  | 67006449  | St3gal1     | 11,6014509 | 4,05E-05   | 0,00088503  |
| XM_976837   | chr1  | 15297665  | 15696895  | Kcnb2       | 11,597538  | 4,27E-05   | 0,00089285  |
| NM_008055   | chr7  | 89279585  | 89285277  | Fzd4        | 11,5926354 | 2,67E-06   | 0,00048376  |
| NM_181444   | chr6  | 135031379 | 135050396 | Gprc5a      | 11,5782342 | 0,000141   | 0,00134283  |
| NM_008002   | chr13 | 119933906 | 119910988 | Fgf10       | 11,5645723 | 0,0013975  | 0,00041344  |
| NM_172444   | chr9  | 59767724  | 59939141  | Thsd4       | 11,5156718 | 7,48E-06   | 0,00053713  |
| S53716      | chr5  | 73034874  | 73147594  | Tec         | 11,4480238 | 1,43E-05   | 0,00060233  |
| NM_013454   | chr4  | 53051887  | 53180992  | Abca1       | 11,4347004 | 0,00758825 | 0,01194643  |
| NM_008393   | chr8  | 94687652  | 94690502  | Irx3        | 11,4096556 | 0,00255642 | 0,00567861  |
| BC037071    | chr5  | 73034874  | 73147566  | Tec         | 11,3984836 | 5,47E-06   | 0,00053609  |
| XM_976153   | chr6  | 40628669  | 40698729  | Mgam        | 11,3784594 | 0,00011014 | 0,00122629  |
| AK134901    | chr18 | 84222079  | 84223960  | Zadh2       | 11,3398265 | 6,22E-05   | 0,00102496  |
| NM_139148   | chr3  | 144760127 | 144786688 | Clca4       | 11,3250067 | 0,0086524  | 0,00314618  |
| NM_010720   | chr18 | 75064727  | 75086471  | Lipg        | 11,2971738 | 0,0009904  | 0,00332851  |
| NM_013689   | chr5  | 73034872  | 73147618  | Tec         | 11,2917459 | 5,10E-05   | 0,00095622  |
| AK014845    | chr12 | 35458826  | 35459923  | 4921508M14R | 11,228604  | 0,00014557 | 0,00136125  |
| AK141403    | chr15 | 102930317 | 102932636 | N/A         | 11,1716729 | 0,00029352 | 0,00183181  |
| BC062141    | chr17 | 43416053  | 43500448  | Dscr1l1     | 11,1593931 | 5,46E-05   | 0,00098615  |
| NM_007729   | chr3  | 114022728 | 114212291 | Col11a1     | 11,1592126 | 0,00144905 | 0,00408202  |
| NM_008937   | chr1  | 191822562 | 191871468 | Prox1       | 11,130347  | 0,00014927 | 0,00137759  |
| NM_178804   | chr5  | 48273040  | 48593759  | Slit2       | 11,1188576 | 0,00063671 | 0,00261872  |
| AK141564    | chr18 | 60725577  | 60735473  | Synpo       | 11,094402  | 0,00092155 | 0,00317587  |
| XM_620293   | chr6  | 22825502  | 22954686  | Ptprz1      | 11,0478214 | 0,00023061 | 0,00164853  |
| AK017419    | chr7  | 141888891 | 141890077 | 5530400B01R | 11,0408806 | 0,00074995 | 0,00283884  |
| NM_018764   | chr5  | 58006336  | 58017692  | Pcdh7       | 10,9508934 | 0,00242226 | 0,00546682  |
| NM_011160   | chr19 | 30634543  | 31730367  | Prkg1       | 10,9471746 | 4,77E-05   | 0,000929    |
| AK162804    | chr17 | 8762316   | 8822462   | Pde10a      | 10,9404487 | 1,37E-05   | 0,00060233  |
| NM_008032   | chrX  | 65620995  | 66128702  | Aff2        | 10,8748731 | 0,00029218 | 0,00182981  |
| BC046452    | chr4  | 117969122 | 117987703 | Tie1        | 10,8722603 | 0,01053544 | 0,001539382 |
| NM_019445   | chr1  | 176325846 | 176658752 | Fmn2        | 10,841281  | 0,00084972 | 0,00303175  |
| D16263      | chr13 | 90131260  | 90205738  | Cspg2       | 10,7888561 | 0,00202916 | 0,00494193  |
| NM_008813   | chr10 | 24330826  | 24401518  | Enpp1       | 10,7855412 | 0,00010127 | 0,0011774   |
| NM_053078   | chr18 | 33561829  | 33588243  | DOH4S114    | 10,7367094 | 0,0005414  | 0,00240593  |
| AK134785    | chr18 | 61170568  | 61210426  | Pdgfrb      | 10,7280305 | 0,00061648 | 0,0025683   |
| BC061695    | chr6  | 36645081  | 36740313  | Ptn         | 10,7192594 | 0,00232521 | 0,00532806  |
| NM_026516   | chr17 | 80852957  | 80910136  | 2810417M05R | 10,7010713 | 0,00417866 | 0,00784504  |
| NM_013505   | chr18 | 20173807  | 20202515  | Dsc2        | 10,6641224 | 3,62E-05   | 0,00085588  |
| NM_011821   | chr14 | 115808386 | 116859339 | Gpc6        | 10,6368323 | 0,00024237 | 0,00169046  |
| NM_00101383 | chr19 | 30633547  | 31831030  | Prkg1       | 10,5737851 | 0,00064855 | 0,0026518   |
| NM_025626   | chr2  | 3630729   | 3699406   | 3110001A13R | 10,5556487 | 0,00071402 | 0,00278211  |
| NM_080555   | chr4  | 104655278 | 104730699 | Ppap2b      | 10,5465556 | 0,00184981 | 0,00468639  |
| NM_133720   | chr14 | 17164209  | 171784144 | Cysl2       | 10,5028576 | 0,00276626 | 0,0059475   |
| NM_028882   | chr5  | 12389561  | 12593064  | Sema3d      | 10,498539  | 0,00010131 | 0,0011774   |
| XM_125637   | chr10 | 68607966  | 68687148  | Rhobtb1     | 10,4969624 | 7,15E-05   | 0,00105819  |
| NM_010496   | chr12 | 25682878  | 25685148  | Id2         | 10,4883319 | 0,00027913 | 0,00178941  |
| BC065787    | chr9  | 54562956  | 54571246  | Crabp1      | 10,480338  | 0,00222808 | 0,00518298  |
| AK081942    | chr18 | 52893512  | 53040982  | Sncap       | 10,4706565 | 0,00016706 | 0,0014314   |
| XM_902118   | chr10 | 104948934 | 104954613 | LOC627573   | 10,4643201 | 0,00339203 | 0,00677951  |
| AK157781    | chr15 | 13115925  | 13118317  | N/A         | 10,4377342 | 0,00051557 | 0,00235722  |
| BC054807    | chr19 | 29318437  | 29378333  | Jak2        | 10,4308151 | 0,00181357 | 0,00463459  |
| AJ133130    | chr6  | 22825722  | 22954669  | Ptprz1      | 10,4014301 | 0,00022393 | 0,00162319  |
| BC025872    | chr1  | 167485619 | 167544689 | Rcsd1       | 10,3909333 | 0,00151451 | 0,00418438  |
| BC108402    | chr9  | 116426002 | 117101155 | Rbms3       | 10,3510365 | 0,00143826 | 0,00406394  |
| BC023889    | chr6  | 54438684  | 54495936  | Scnr1       | 10,329439  | 0,00045501 | 0,0025759   |
| BC027504    | chr15 | 78678119  | 78682751  | Lgals2      | 10,312103  | 0,00014037 | 0,00134116  |
| AK048081    | chr16 | 74232474  | 74294505  | Robo2       | 10,3041719 | 0,00696952 | 0,01120323  |
| NM_00104042 | chr9  | 59767714  | 60309041  | Thsd4       | 10,1964615 | 3,24E-06   | 0,00048602  |
| NM_029035   | chr4  | 148740082 | 148798806 | Spbs1       | 10,1793486 | 0,00405061 | 0,00771311  |
| AK133040    | chr18 | 43449557  | 43498603  | Dpysl3      | 10,1139174 | 0,00013475 | 0,0013321   |
| AK076000    | chr6  | 51788748  | 51942098  | Scap2       | 10,0917654 | 3,62E-06   | 0,00049484  |
| NM_173182   | chr3  | 27607233  | 27901450  | Fndc3b      | 10,0902033 | 0,00015752 | 0,00140171  |
| X95227      | chr18 | 23453234  | 23776445  | Dtna        | 10,0188152 | 0,00011259 | 0,00123072  |
| AK143023    | chr8  | 94687638  | 94690683  | Irx3        | 9,99160654 | 0,01103628 | 0,01596659  |
| BC099670    | chr15 | 66935957  | 67006438  | St3gal1     | 9,97598987 | 1,05E-05   | 0,00056386  |
| NM_177368   | chr10 | 104591772 | 104978561 | Tmtc2       | 9,9690544  | 0,00382895 | 0,00741416  |

|             |       |           |           |             |            |            |            |
|-------------|-------|-----------|-----------|-------------|------------|------------|------------|
| NM_130861   | chr6  | 142191451 | 142280172 | Slco1a5     | 9,94593268 | 0,00300263 | 0,0062833  |
| D32040      | chr13 | 90131260  | 90216448  | Cspg2       | 9,93474773 | 0,00142986 | 0,00405723 |
| NM_013657   | chr5  | 17086639  | 17242092  | Sema3c      | 9,92777212 | 0,00277757 | 0,00596536 |
| BC059012    | chr6  | 118120184 | 118163337 | Ret         | 9,91097277 | 2,13E-05   | 0,00069344 |
| NM_009472   | chr3  | 141402950 | 141772309 | Unc5c       | 9,83419299 | 0,00273943 | 0,00591114 |
| AK132346    | chr18 | 52893077  | 53041233  | Sncaip      | 9,80780299 | 0,00096063 | 0,00327993 |
| AK048812    | chr2  | 106673118 | 106677643 | N/A         | 9,79625277 | 0,00030772 | 0,00186288 |
| BC013594    | chr6  | 142191452 | 142238058 | Slco1a5     | 9,77292215 | 0,00326174 | 0,00662491 |
| NM_028263   | chr19 | 36982693  | 36984743  | 2610306H15R | 9,77188352 | 0,00128346 | 0,00383096 |
| NM_177698   | chr8  | 70625035  | 70903563  | 4931420C21R | 9,75591147 | 0,00040555 | 0,00210067 |
| NM_172385   | chr7  | 37187868  | 37478512  | Zfp536      | 9,71831818 | 0,00568076 | 0,00970728 |
| BC089357    | chr4  | 148740085 | 148751039 | Spsb1       | 9,6569437  | 0,00396103 | 0,0076106  |
| NM_013496   | chr9  | 54562944  | 54571246  | Crabp1      | 9,59110252 | 0,00099126 | 0,00332952 |
| NM_018773   | chr6  | 51788747  | 51942132  | Scap2       | 9,54536258 | 5,08E-05   | 0,00095622 |
| AY512958    | chr1  | 62108439  | 62112331  | N/A         | 9,52372965 | 0,00081916 | 0,00297684 |
| BC058960    | chr6  | 15135508  | 15388293  | Foxp2       | 9,52119947 | 0,00449209 | 0,00662456 |
| NM_0010400E | chr7  | 90223890  | 90285630  | Sytl2       | 9,47476394 | 0,00130224 | 0,00386267 |
| AK008428    | chr1  | 165084254 | 165125899 | Prrx1       | 9,33616462 | 0,00933672 | 0,01396176 |
| NM_027219   | chr15 | 78669901  | 78678157  | Cdc42ep1    | 9,30818575 | 0,00019726 | 0,0015188  |
| NM_011866   | chr17 | 8639918   | 8824810   | Pde10a      | 9,30711048 | 3,82E-06   | 0,00049484 |
| BC003706    | chr3  | 137278503 | 137368455 | Emcn        | 9,21267424 | 0,0002976  | 0,00183867 |
| NM_027326   | chr4  | 87243892  | 87504502  | Mlit3       | 9,18557478 | 0,00145224 | 0,004086   |
| NM_198013   | chr11 | 87915443  | 88009110  | Cuedc1      | 9,16941694 | 0,00038725 | 0,00206033 |
| NM_172913   | chr8  | 93137144  | 93238207  | Tnrc9       | 9,08714227 | 0,00292846 | 0,00618253 |
| NM_010025   | chrX  | 139102209 | 139179587 | Dcx         | 9,07442775 | 0,00226175 | 0,00523414 |
| XM_134865   | chr9  | 72722776  | 72743664  | Pygo1       | 9,05576592 | 0,00135343 | 0,00395353 |
| BC052044    | chr8  | 93137218  | 93238083  | Tnrc9       | 9,05434325 | 0,00541338 | 0,00939307 |
| NM_011648   | chr12 | 91806607  | 91945435  | Tshp1       | 9,02981648 | 0,00412771 | 0,00779519 |
| AK016941    | chr18 | 52893771  | 52996991  | Sncaip      | 9,02232966 | 0,00104466 | 0,00340917 |
| NM_011894   | chr14 | 30203992  | 30264870  | Sh3bp5      | 9,00009357 | 0,00011333 | 0,00123524 |
| BC068155    | chr1  | 196320770 | 196513249 | Plxna2      | 8,98577746 | 0,00055537 | 0,00243108 |
| AK035333    | chr4  | 58237512  | 58300666  | Svep1       | 8,97670924 | 0,00146566 | 0,00411019 |
| NM_009829   | chr6  | 127091326 | 127116667 | Ccnd2       | 8,97656406 | 0,00015673 | 0,00140094 |
| AK030323    | chr4  | 83746840  | 84146317  | Bnc2        | 8,97059285 | 0,00186579 | 0,0047075  |
| NM_029931   | chr4  | 87243903  | 87277545  | Mlit3       | 8,95204114 | 0,00302053 | 0,00630196 |
| NM_023814   | chr9  | 87502144  | 87529206  | Tltx18      | 8,94492881 | 0,00955117 | 0,0142147  |
| AK147009    | chr4  | 87243903  | 87277468  | Mlit3       | 8,91738064 | 0,00234096 | 0,00535154 |
| NM_010087   | chr18 | 23558451  | 23747241  | Dtna        | 8,90803154 | 0,00050511 | 0,00234312 |
| NM_008882   | chr1  | 196320644 | 196513298 | Plxna2      | 8,88500959 | 0,00010262 | 0,0011857  |
| NM_011535   | chr5  | 119931285 | 119945218 | Tbx3        | 8,88129467 | 0,00030835 | 0,00186288 |
| NM_178638   | chr9  | 103342588 | 103619967 | Tmem108     | 8,84128867 | 0,00078128 | 0,00291671 |
| NM_007727   | chr15 | 91956371  | 92168291  | Cntn1       | 8,83252953 | 0,00180646 | 0,00462562 |
| XM_147067   | chr9  | 100361539 | 100390593 | Tmem22      | 8,80553097 | 0,00145691 | 0,00409142 |
| BC096495    | chr13 | 90185430  | 90216514  | Cspg2       | 8,75669624 | 0,00119687 | 0,00368768 |
| XM_00100170 | chr7  | 115830752 | 115867190 | LOC668479   | 8,74498959 | 0,00239213 | 0,00542895 |
| BC023448    | chr14 | 115808839 | 116858200 | Gpc6        | 8,69273401 | 0,00011696 | 0,00125644 |
| NM_148944   | chr9  | 54826292  | 54846681  | Chrn4       | 8,68438288 | 0,00471182 | 0,00854375 |
| NM_009569   | chr8  | 125168228 | 125223337 | Zfpm1       | 8,67782404 | 0,00027729 | 0,00178148 |
| NM_010454   | chr6  | 52135947  | 52138207  | Hoxa6       | 8,63659916 | 0,00046385 | 0,00227609 |
| NM_008624   | chr9  | 99197327  | 99246063  | Mras        | 8,633786   | 0,00041256 | 0,00212047 |
| NM_183033   | chr18 | 83090046  | 83137151  | Zfp516      | 8,60852859 | 8,62E-05   | 0,00112072 |
| NM_00103884 | chr1  | 167485619 | 167544769 | Rcsd1       | 8,6043726  | 0,00030409 | 0,00185674 |
| AK147314    | chr16 | 34071771  | 34433795  | Kalrn       | 8,58094577 | 0,0028528  | 0,00606576 |
| NM_009468   | chr18 | 43449612  | 43518664  | Dpysl3      | 8,57664456 | 0,00010941 | 0,00122385 |
| BC050049    | chr1  | 69614776  | 69620348  | Zfpn1a2     | 8,57262281 | 0,0032772  | 0,00664354 |
| NM_019931   | chr3  | 105586871 | 105797265 | Kcnd3       | 8,49503564 | 0,00197793 | 0,00488096 |
| NM_00101338 | chr11 | 83226266  | 83237233  | Rasl10b     | 8,48332598 | 0,0001763  | 0,00145985 |
| NM_021356   | chr8  | 83660179  | 83776225  | Gab1        | 8,46762082 | 0,00040068 | 0,00208781 |
| NM_053136   | chr18 | 37547391  | 37550701  | Pcdhb11     | 8,41628368 | 0,00714274 | 0,011395   |
| NM_007423   | chr5  | 91565936  | 91584106  | Afp         | 8,39777228 | 0,00038244 | 0,00205599 |
| NM_053141   | chr18 | 37603813  | 37608758  | Pcdhb16     | 8,39369864 | 0,00187381 | 0,00471776 |
| NM_172870   | chr4  | 83746325  | 84017564  | Bnc2        | 8,39243815 | 0,00266421 | 0,00582901 |
| NM_011058   | chr5  | 75434044  | 75479893  | Pdgfra      | 8,3822255  | 0,00692725 | 0,0111562  |
| NM_027268   | chr6  | 54438393  | 54495960  | Scrn1       | 8,37392115 | 0,00048763 | 0,00232209 |
| XM_901640   | chr18 | 59300708  | 59307392  | 4833446K15R | 8,37127091 | 0,00039255 | 0,00206566 |
| BC031111    | chr2  | 121990353 | 121994044 | 9030623N16R | 8,36620491 | 0,00675603 | 0,01097832 |
| NM_178789   | chr15 | 94457364  | 94924277  | Tmem117     | 8,34107502 | 0,00131882 | 0,00388717 |
| XM_890229   | chr4  | 137725650 | 137730594 | Camk2n1     | 8,33930218 | 6,72E-05   | 0,00103474 |
| NM_011303   | chr4  | 144159763 | 144194896 | Dhrs3       | 8,31452204 | 0,00029924 | 0,00184302 |
| AK083120    | chr9  | 57861924  | 57940168  | Stra6       | 8,31016238 | 0,0005448  | 0,00241342 |
| BC091652    | chr7  | 129953648 | 130053216 | Fgfr2       | 8,2806652  | 0,00111307 | 0,00353573 |
| AK220505    | chr5  | 48272818  | 48593204  | Slit2       | 8,27752808 | 0,00088493 | 0,00310014 |
| BC062926    | chr6  | 15135505  | 15390090  | Foxp2       | 8,26791372 | 0,00534106 | 0,00930821 |
| NM_144552   | chr12 | 45722771  | 45944769  | Stxbp6      | 8,22774263 | 0,00148335 | 0,00413453 |
| NM_026408   | chr18 | 52893461  | 53040681  | Sncaip      | 8,21380103 | 0,00037545 | 0,00204961 |
| NM_009623   | chr15 | 64528706  | 64751833  | Adcy8       | 8,20342667 | 0,00051774 | 0,00235866 |

|             |       |           |           |             |            |            |            |
|-------------|-------|-----------|-----------|-------------|------------|------------|------------|
| NM_173007   | chr6  | 21721395  | 21802516  | Tspan12     | 8,19274361 | 0,00048435 | 0,00231384 |
| XM_915058   | chr16 | 33892681  | 34015747  | Kalrn       | 8,16870094 | 0,00083854 | 0,00300566 |
| BC005757    | chr11 | 114687533 | 114688439 | Gprc5c      | 8,1170003  | 0,00038329 | 0,00205599 |
| NM_010437   | chr10 | 13656576  | 13841576  | Hivep2      | 8,11085123 | 0,00269633 | 0,00586698 |
| BC015256    | chr7  | 89279557  | 89284594  | Fzd4        | 8,09963371 | 1,40E-05   | 0,00060233 |
| NM_133719   | chr17 | 25522170  | 25524645  | Metrn       | 8,08630152 | 0,00056745 | 0,00246047 |
| BC056391    | chrX  | 139107089 | 139179480 | Dcx         | 8,08234163 | 0,00112582 | 0,00355514 |
| BC010477    | chrX  | 134957006 | 135018678 | Rnf128      | 8,07399858 | 8,73E-05   | 0,00112072 |
| NM_008734   | chr14 | 37282203  | 38384967  | Nrg3        | 8,05162511 | 0,00815767 | 0,01259904 |
| NM_025622   | chr15 | 78678116  | 78682784  | Lgals2      | 8,02482538 | 0,00014744 | 0,0013692  |
| BC008228    | chr11 | 114686708 | 114688419 | Gprc5c      | 8,01896848 | 0,00049367 | 0,00233471 |
| BC096377    | chr8  | 55576324  | 55685147  | Vegfc       | 7,96302544 | 0,00481121 | 0,00586637 |
| NM_178749   | chr18 | 43333027  | 43442812  | Stk32a      | 7,94613516 | 0,00544938 | 0,00943357 |
| AB086957    | chr10 | 84185992  | 84336335  | Rfx4        | 7,92374984 | 0,00881281 | 0,01331949 |
| NM_172826   | chr17 | 13932140  | 13940691  | Dact2       | 7,92188267 | 0,00049118 | 0,00232785 |
| NM_146240   | chr10 | 101941909 | 101976248 | Pamci       | 7,92058323 | 0,00355815 | 0,00202208 |
| NM_00103322 | chr10 | 106675940 | 106829253 | Lin7a       | 7,91692399 | 0,00611353 | 0,01020405 |
| NM_146336   | chr9  | 37959625  | 37960564  | Olfr893     | 7,9010077  | 6,03E-05   | 0,00102208 |
| NM_009608   | chr2  | 113738729 | 113744252 | Actc1       | 7,89578843 | 0,00200108 | 0,00490922 |
| NM_198193   | chr10 | 21862936  | 21873330  | Raet1e      | 7,88222719 | 6,57E-06   | 0,00083713 |
| BC068319    | chrX  | 41031199  | 41034628  | Wdr40b      | 7,87187148 | 0,006357   | 0,01049292 |
| NM_007811   | chr19 | 37762997  | 37766680  | Cyp26a1     | 7,86512667 | 0,00684049 | 0,0110523  |
| BC005558    | chr4  | 104655291 | 104729072 | Ppap2b      | 7,86274645 | 7,58E-05   | 0,00108714 |
| NM_177110   | chr2  | 106618896 | 106620371 | C130023O10R | 7,85562829 | 2,98E-05   | 0,00083399 |
| BC002081    | chr4  | 94541721  | 94543383  | Jun         | 7,83472878 | 0,00024956 | 0,00170185 |
| XM_898135   | chr6  | 18381910  | 18464869  | Ctnnbp2     | 7,80670272 | 0,00111784 | 0,0035412  |
| NM_201601   | chr7  | 129954866 | 130057411 | Fgfr2       | 7,80167193 | 0,00204123 | 0,00495706 |
| NM_008413   | chr19 | 29318451  | 29377979  | Jak2        | 7,79282634 | 0,00072794 | 0,00279097 |
| AK078469    | chr15 | 66935961  | 67006330  | St3gal1     | 7,78577148 | 4,91E-05   | 0,00094687 |
| NM_145134   | chr9  | 96752833  | 96827707  | Spsb4       | 7,77937004 | 0,00101137 | 0,00336247 |
| AK145359    | chr14 | 45305550  | 45312546  | Bmp4        | 7,76283344 | 8,71E-06   | 0,00054925 |
| AK051668    | chr6  | 14851387  | 15361938  | Poxp2       | 7,75473062 | 0,01151223 | 0,01649108 |
| NM_008242   | chr13 | 99454411  | 99456849  | Foxd1       | 7,73955168 | 0,00843837 | 0,01288825 |
| NM_182930   | chr1  | 135073651 | 135129195 | Plekha6     | 7,733492   | 7,11E-05   | 0,00105819 |
| BC014767    | chr7  | 97998852  | 98037526  | Capn5       | 7,73268798 | 0,00090396 | 0,00314322 |
| NM_007553   | chr2  | 133244639 | 133254326 | Bmp2        | 7,73150889 | 0,00121213 | 0,0037101  |
| NM_010446   | chr2  | 147734363 | 147738410 | Foxa2       | 7,72661582 | 0,00031189 | 0,00187073 |
| BC110483    | chr4  | 83746459  | 84017553  | Bnc2        | 7,72634804 | 0,00207599 | 0,00498443 |
| BC096551    | chr5  | 119931478 | 119944613 | Tbx3        | 7,7065759  | 0,0007126  | 0,00278211 |
| BC054371    | chr7  | 123268905 | 123272077 | Zfp694      | 7,68145709 | 0,00154902 | 0,00423248 |
| NM_026582   | chr3  | 159775029 | 159871126 | Gpr177      | 7,66702385 | 2,28E-05   | 0,00071887 |
| NM_010612   | chr5  | 76214961  | 76260125  | Kdr         | 7,60993079 | 0,00336533 | 0,00675104 |
| AK028402    | chr18 | 23639844  | 23692971  | Dtna        | 7,60081085 | 0,00015659 | 0,00140094 |
| AK137389    | chr11 | 44461601  | 44850431  | Ebf1        | 7,59459659 | 0,01264047 | 0,01780763 |
| NM_175006   | chr13 | 18132389  | 18389469  | Pou6f2      | 7,55010478 | 0,00537254 | 0,00934941 |
| BC042773    | chr19 | 23369848  | 23515449  | Mamdc2      | 7,5432348  | 5,87E-05   | 0,00101087 |
| AK161806    | chr3  | 141771134 | 141772309 | Unc5c       | 7,52897429 | 0,00876879 | 0,01326218 |
| NM_356226   | chr9  | 15660585  | 16128624  | Fat3        | 7,52575679 | 8,36E-06   | 0,00054898 |
| DQ143899    | chr7  | 128039165 | 128044859 | Tgfb1i1     | 7,52073328 | 0,00280032 | 0,00599711 |
| BC024598    | chr12 | 45725507  | 45944639  | Stxbp6      | 7,511269   | 0,00102214 | 0,00337061 |
| XM_894621   | chr7  | 123269778 | 123291597 | Zfp694      | 7,49462694 | 0,00171452 | 0,00449545 |
| AK077302    | chr11 | 28753203  | 28826739  | Efemp1      | 7,49208188 | 0,00019455 | 0,0015124  |
| BC106154    | chr15 | 101824744 | 101832327 | Krt2-8      | 7,48626785 | 0,00079243 | 0,00293444 |
| BC067389    | chr3  | 27608515  | 27901518  | Fndc3b      | 7,48483234 | 6,98E-05   | 0,00105565 |
| BC018237    | chr14 | 30203637  | 30265074  | Sh3bp5      | 7,47577596 | 0,00034255 | 0,00196187 |
| NM_201352   | chr7  | 99255631  | 99335067  | Gdpd5       | 7,46538501 | 5,70E-05   | 0,00100606 |
| NM_007602   | chr7  | 97996756  | 98053385  | Capn5       | 7,44189482 | 0,00134386 | 0,00394295 |
| NM_175327   | chrX  | 8049340   | 8051922   | B630019K06R | 7,42190739 | 0,00060353 | 0,00253756 |
| NM_011576   | chr2  | 84233698  | 84275013  | Tfpi        | 7,41130022 | 0,00209678 | 0,00500841 |
| NM_030263   | chr8  | 70625869  | 70839921  | 4931420C21R | 7,39556311 | 0,00010606 | 0,00120915 |
| NM_008480   | chr17 | 67602231  | 67727594  | Lama1       | 7,39282963 | 0,00067395 | 0,00269488 |
| NM_010468   | chr2  | 74544766  | 74548445  | Hoxd3       | 7,36658856 | 0,00123031 | 0,00374239 |
| BC033313    | chr13 | 55162261  | 55178355  | Fgfr4       | 7,34374858 | 0,0003194  | 0,00189658 |
| XM_622104   | chr7  | 123268676 | 123272077 | Zfp694      | 7,3382192  | 0,00128402 | 0,00383096 |
| NM_008888   | chr5  | 67373531  | 67378261  | Phox2b      | 7,30958753 | 0,00757484 | 0,01193162 |
| NM_178739   | chrX  | 41031196  | 41034778  | Wdr40b      | 7,28877652 | 0,00921792 | 0,0138153  |
| NM_021457   | chr5  | 4759844   | 4763977   | Fzd1        | 7,28820396 | 0,00055503 | 0,00243108 |
| AK220516    | chr3  | 126588972 | 126836935 | Camk2d      | 7,27459367 | 0,00044149 | 0,00221563 |
| BC053036    | chr5  | 75437862  | 75477549  | Pdgfra      | 7,26624495 | 0,0043325  | 0,00804934 |
| NM_029270   | chr5  | 102721692 | 103138131 | Arhgap24    | 7,24535644 | 0,00308043 | 0,00636807 |
| AK165186    | chr2  | 106494107 | 106669192 | Mpped2      | 7,23506845 | 4,61E-06   | 0,00051814 |
| BC012673    | chr19 | 37763026  | 37766680  | Cyp26a1     | 7,21483633 | 0,00445122 | 0,00820092 |
| NM_00102543 | chr3  | 126588994 | 126837076 | Camk2d      | 7,21015363 | 0,00044466 | 0,00222592 |
| BC058740    | chr17 | 13931827  | 13940356  | Dact2       | 7,20762191 | 0,00070129 | 0,00277023 |
| BC052894    | chr3  | 126589373 | 126836933 | Camk2d      | 7,17832213 | 9,64E-05   | 0,00115857 |
| NM_134083   | chr14 | 71876342  | 71917843  | Rcbtb2      | 7,17164131 | 0,00111979 | 0,00354216 |

|             |       |           |           |              |            |            |            |
|-------------|-------|-----------|-----------|--------------|------------|------------|------------|
| AB091765    | chr11 | 114706392 | 114718029 | Cd300a       | 7,1599855  | 0,00019759 | 0,0015188  |
| BC103591    | chr6  | 34851165  | 34869448  | Stra8        | 7,14082123 | 0,00127927 | 0,00383075 |
| NM_147217   | chr11 | 114668144 | 114685186 | Gprc5c       | 7,14055725 | 0,00020097 | 0,00153024 |
| AK122469    | chr5  | 77932304  | 77948205  | C530008M17R  | 7,12763438 | 0,00136125 | 0,00396237 |
| XM_994613   | chr10 | 117032083 | 117090343 | Cpm          | 7,10663531 | 0,00010524 | 0,00120664 |
| NM_008591   | chr6  | 17441240  | 17521823  | Met          | 7,10569944 | 0,00038382 | 0,00205599 |
| NM_146188   | chr7  | 34347774  | 34361601  | Kctd15       | 7,09510155 | 0,00049488 | 0,00233606 |
| BC023765    | chr3  | 87170555  | 87260477  | Kirrel1      | 7,09451142 | 6,64E-05   | 0,00102758 |
| XM_900434   | chr1  | 54679506  | 54870903  | Ankrd44      | 7,09300354 | 0,00092768 | 0,00319149 |
| NM_053146   | chr18 | 37639625  | 37642337  | Pcdhb21      | 7,08839991 | 0,00417669 | 0,00784504 |
| BC013459    | chr14 | 45305598  | 45312453  | Bmp4         | 7,07119151 | 5,49E-05   | 0,00098615 |
| BC034053    | chr14 | 45305598  | 45312427  | Bmp4         | 7,05643745 | 0,00013597 | 0,0013321  |
| AK163880    | chr13 | 24646177  | 24703190  | 6330500D04R  | 7,05294929 | 0,00570076 | 0,00971917 |
| BC100568    | chr16 | 19860062  | 19896579  | Klhl6        | 7,0393717  | 0,00170203 | 0,00447804 |
| NM_007554   | chr14 | 45305735  | 45309065  | Bmp4         | 7,0215198  | 1,38E-05   | 0,00060233 |
| NM_178756   | chr4  | 49080561  | 49361361  | E130309F12Ri | 7,01702742 | 0,00293451 | 0,00394712 |
| AK080221    | chr15 | 100297148 | 100307197 | Letmd1       | 7,01445006 | 0,00010896 | 0,00122332 |
| AK082079    | chr18 | 52893683  | 53041300  | Sncap        | 7,00586657 | 0,00015557 | 0,00139921 |
| AK043375    | chr14 | 30188888  | 30265087  | Sh3bp5       | 6,96635181 | 9,69E-05   | 0,00115857 |
| XM_149291   | chr3  | 23995407  | 24130550  | 2810043G22R  | 6,94738477 | 0,00134793 | 0,00394712 |
| AK157958    | chr11 | 104424143 | 104483457 | Itgb3        | 6,94486508 | 0,00385389 | 0,00745278 |
| BC055059    | chr6  | 52152682  | 52155763  | Hoxa9        | 6,93482752 | 0,00194196 | 0,00483221 |
| BC113201    | chr17 | 8688159   | 8820429   | Pde10a       | 6,93290504 | 4,14E-05   | 0,000887   |
| NM_00100436 | chr10 | 83801109  | 83870270  | Nuak1        | 6,93141549 | 0,00018784 | 0,00149633 |
| NM_146015   | chr11 | 28767772  | 28826737  | Efemp1       | 6,92541248 | 9,88E-05   | 0,00116887 |
| NM_011084   | chr6  | 139803850 | 139931692 | Pik3c2g      | 6,89816833 | 0,00380608 | 0,00738296 |
| AK122453    | chr14 | 11165831  | 11616346  | Cadps        | 6,89673404 | 0,00850523 | 0,01296884 |
| AK154778    | chrX  | 154599976 | 154708142 | Rps6ka3      | 6,89346817 | 0,001801   | 0,00461434 |
| AK148840    | chr3  | 126589267 | 126835756 | Camk2d       | 6,88501597 | 0,00013508 | 0,0013321  |
| NM_172589   | chr13 | 95158548  | 95296163  | Lhfp12       | 6,86911069 | 0,00065874 | 0,00266798 |
| AK133705    | chr2  | 74537353  | 74548754  | Hoxd3        | 6,85848534 | 0,00280641 | 0,00600073 |
| BC030065    | chr2  | 53899484  | 53900761  | Jprm         | 6,85094657 | 0,00220309 | 0,00515697 |
| NM_010591   | chr4  | 94541072  | 94544205  | Rpn          | 6,85093074 | 0,00134761 | 0,00394712 |
| AK032524    | chr3  | 126589026 | 126810823 | Camk2d       | 6,83764726 | 0,00190024 | 0,00476093 |
| NM_009946   | chr13 | 54380973  | 54393539  | Cplx2        | 6,82796975 | 0,0023746  | 0,00540563 |
| NM_178660   | chr9  | 116426293 | 117100841 | Rbms3        | 6,81386485 | 0,0028875  | 0,0018217  |
| AK031440    | chr4  | 83859913  | 84146230  | Bnc2         | 6,81139359 | 0,00340189 | 0,00679332 |
| NM_172399   | chr6  | 65601188  | 65636508  | A930038C07R  | 6,80978854 | 0,00709099 | 0,01133626 |
| BC040389    | chr13 | 95274822  | 95296163  | Lhfp12       | 6,79817107 | 0,00098334 | 0,00332351 |
| AK087349    | chr8  | 123972942 | 123974092 | Foxf1a       | 6,78917685 | 0,0018507  | 0,00468639 |
| XM_990348   | chr4  | 62602307  | 62620389  | LOC667396    | 6,779239   | 0,00018427 | 0,00148661 |
| NM_027552   | chr2  | 43377337  | 43504724  | Kynu         | 6,77350863 | 0,0045137  | 0,0082628  |
| XM_287460   | chr5  | 77915373  | 77948329  | C530008M17R  | 6,771537   | 0,00137633 | 0,00397927 |
| NM_027426   | chr4  | 146944455 | 14697498  | 2610109H07R  | 6,77023854 | 0,00297161 | 0,00624002 |
| X67553      | chr4  | 94231535  | 94366954  | Tek          | 6,76820531 | 0,00492943 | 0,00882295 |
| AJ010604    | chr6  | 143788836 | 144166717 | Sox5         | 6,76723584 | 0,00046781 | 0,00228602 |
| NM_007521   | chr4  | 32567562  | 32909812  | Bach2        | 6,75188345 | 0,0001908  | 0,00149871 |
| NM_009880   | chr18 | 61144233  | 61161568  | Cdx1         | 6,73715738 | 0,01334522 | 0,01862893 |
| BC065152    | chr6  | 21721392  | 21802079  | Tspan12      | 6,72947209 | 0,00016209 | 0,00142469 |
| AK049405    | chr7  | 141184633 | 141188133 | Tmem80       | 6,72274301 | 0,00070965 | 0,00278205 |
| AK012848    | chr4  | 62451966  | 62602109  | Zfp618       | 6,71642411 | 2,60E-05   | 0,00079427 |
| XM_358744   | chr8  | 48793088  | 48945179  | 4930448N21R  | 6,68376032 | 0,00359313 | 0,00706539 |
| NM_172553   | chr10 | 102437534 | 102458465 | Cart1        | 6,68321985 | 0,00426865 | 0,00796182 |
| NM_145463   | chr14 | 58579417  | 58585765  | Tmem46       | 6,6776015  | 0,00029603 | 0,00183847 |
| BC055705    | chr9  | 96752834  | 96827575  | Spsb4        | 6,65957449 | 0,00076169 | 0,00287237 |
| AK083698    | chr9  | 96803400  | 96828116  | Spsb4        | 6,65492927 | 0,00083876 | 0,00300566 |
| BC050824    | chr4  | 94231312  | 94366954  | Tek          | 6,65382228 | 0,00521581 | 0,00914607 |
| AK031477    | chr8  | 70640514  | 70747222  | 4931420C21R  | 6,61762405 | 0,00128384 | 0,00383096 |
| AK031239    | chr11 | 44461538  | 44848952  | Ebf1         | 6,6046556  | 0,01398986 | 0,01930284 |
| XM_986681   | chr7  | 90273409  | 90285897  | Sytl2        | 6,5828394  | 0,00202028 | 0,00493039 |
| AK159977    | chr3  | 159775033 | 159848726 | Gprk177      | 6,56899803 | 0,00028236 | 0,0018043  |
| NM_010469   | chr2  | 74522816  | 74529999  | Hoxd4        | 6,54494015 | 0,00215044 | 0,00505479 |
| AK088003    | chr8  | 64116372  | 64242996  | Sh3rf1       | 6,54256643 | 0,0010555  | 0,00342564 |
| NM_015758   | chr4  | 114423078 | 114423945 | Foxe3        | 6,53748924 | 0,00792639 | 0,0123531  |
| AK039249    | chr17 | 8364974   | 8820670   | Pde10a       | 6,53244618 | 9,88E-05   | 0,00116887 |
| NM_0010087C | chr15 | 6247063   | 6387927   | Dab2         | 6,52116625 | 0,00074493 | 0,00283064 |
| NM_175750   | chr6  | 32080284  | 32518350  | Plxna4       | 6,51964465 | 0,0012451  | 0,00375292 |
| NM_008471   | chr11 | 99956899  | 99962009  | Krt1-19      | 6,51765656 | 0,00080391 | 0,0029513  |
| NM_153071   | chr10 | 51303237  | 51319873  | Gprc6a       | 6,51434443 | 0,00020941 | 0,00157047 |
| BC058395    | chr13 | 54381090  | 54393535  | Cplx2        | 6,51163575 | 0,00404064 | 0,00770706 |
| BC060239    | chr4  | 146942237 | 146974479 | 2610109H07R  | 6,51046234 | 0,00082285 | 0,00297684 |
| AY169784    | chr1  | 82112878  | 82114038  | N/A          | 6,49353165 | 0,00096189 | 0,00328077 |
| BC049086    | chr6  | 127095056 | 127116646 | Ccnd2        | 6,48224403 | 0,00016352 | 0,00142787 |
| NM_133738   | chr5  | 98124989  | 98271264  | Antxr2       | 6,48167492 | 0,00426825 | 0,00796182 |
| NM_130867   | chr3  | 87168738  | 87227036  | Kirrel1      | 6,47585194 | 0,00016319 | 0,00142787 |
| BC019203    | chr10 | 23584288  | 23594243  | Vnn1         | 6,47577712 | 0,0005475  | 0,00241621 |



|             |       |           |           |              |            |            |            |
|-------------|-------|-----------|-----------|--------------|------------|------------|------------|
| BC107349    | chr5  | 43522226  | 43574336  | Cpeb2        | 6,4697651  | 0,00679669 | 0,01100838 |
| NM_031184   | chr16 | 4509940   | 4531181   | Glis2        | 6,45987687 | 0,00112228 | 0,00354587 |
| NM_008011   | chr13 | 55162496  | 55178362  | Fgfr4        | 6,45756384 | 1,66E-05   | 0,00063799 |
| XM_00100015 | chr15 | 100879983 | 100882439 | LOC668225    | 6,45407347 | 6,81E-05   | 0,00103864 |
| BC003716    | chr3  | 36640472  | 36667203  | Anxa5        | 6,45192648 | 0,00083939 | 0,00300566 |
| NM_145839   | chr5  | 99457727  | 99493156  | Rasgef1b     | 6,4480369  | 0,00013557 | 0,0013321  |
| NM_007483   | chr12 | 8523765   | 8525993   | Rhob         | 6,44053261 | 0,00054372 | 0,00241197 |
| AK145442    | chr4  | 87304011  | 87345773  | Mllt3        | 6,4190509  | 0,00870914 | 0,01320275 |
| AK131743    | chr4  | 123397596 | 123398871 | N/A          | 6,41436596 | 0,00141189 | 0,00403794 |
| XM_913690   | chr1  | 127504882 | 127505830 | Gpr39        | 6,40998064 | 0,00034659 | 0,00197355 |
| AK030609    | chr9  | 116426723 | 117100815 | Rbms3        | 6,40978811 | 0,00017026 | 0,00144331 |
| BC026428    | chr7  | 99312392  | 99335066  | Gdpd5        | 6,40209166 | 0,00031884 | 0,00189521 |
| NM_023598   | chr10 | 67490949  | 67674083  | Arid5b       | 6,39996197 | 0,00047325 | 0,00229442 |
| NM_010167   | chr10 | 22793583  | 23039319  | Eya4         | 6,39501023 | 0,0022423  | 0,00520178 |
| BC079557    | chr18 | 37426858  | 37429480  | Pcdhb3       | 6,37753981 | 0,00279266 | 0,00598914 |
| BC062138    | chr2  | 113738728 | 113744241 | Actc1        | 6,36646853 | 0,00362974 | 0,00132027 |
| NM_009655   | chr16 | 52170260  | 52373422  | Alcam        | 6,36320382 | 0,00138841 | 0,00399503 |
| BC018286    | chrX  | 162551198 | 162553239 | Tmsb4x       | 6,35528431 | 0,00039537 | 0,00207066 |
| NM_207000   | chr10 | 61134003  | 61179221  | H2afy2       | 6,35283258 | 0,00053928 | 0,00240299 |
| XM_140740   | chr19 | 53582341  | 53595066  | Gdpd5        | 6,35068993 | 0,00021268 | 0,00021268 |
| NM_172838   | chr19 | 34734402  | 34813108  | Slc16a12     | 6,34819598 | 0,00454409 | 0,00829767 |
| NM_016672   | chr11 | 11714444  | 11780657  | Ddc          | 6,34368001 | 0,00097931 | 0,00331618 |
| NM_009016   | chr10 | 21962835  | 22063555  | Raet1a       | 6,33575552 | 0,00048812 | 0,00232257 |
| BC110659    | chr3  | 90536518  | 90551731  | Npr1         | 6,32826494 | 0,00273546 | 0,00590684 |
| AK135442    | chr14 | 115808271 | 116509993 | Gpc6         | 6,31955658 | 0,00128513 | 0,00383096 |
| NM_148945   | chrX  | 154600224 | 154707590 | Rps6ka3      | 6,31875356 | 0,00131147 | 0,00387461 |
| AK043732    | chr18 | 59300710  | 59304468  | 4833446K15R  | 6,31349995 | 0,0008831  | 0,00310009 |
| NM_010109   | chr17 | 62290209  | 62566779  | Efna5        | 6,31180806 | 0,00421866 | 0,00789195 |
| BC045140    | chr10 | 61134029  | 61179262  | H2afy2       | 6,30095279 | 0,00167663 | 0,00443875 |
| X71426      | chr4  | 94231572  | 94366051  | Tek          | 6,29999202 | 0,00370887 | 0,0072357  |
| NM_147778   | chr2  | 18590215  | 18593970  | Commd3       | 6,29545216 | 0,00015235 | 0,00138265 |
| NM_007606   | chr3  | 14840281  | 14849125  | Car3         | 6,28366673 | 0,00088625 | 0,00310267 |
| NM_009673   | chr3  | 36640473  | 36667247  | Anxa5        | 6,28362318 | 0,00096998 | 0,00329892 |
| NM_018800   | chr3  | 103704341 | 103764239 | Syt6         | 6,28192477 | 0,00189568 | 0,00475321 |
| AK161735    | chrX  | 155185068 | 155320021 | Sh3kbp1      | 6,28179415 | 0,00025961 | 0,00174103 |
| BC004809    | chr19 | 40275551  | 40324818  | Pdlim1       | 6,26761545 | 0,00094884 | 0,00324829 |
| X16053      | chrX  | 162551199 | 162553254 | Tmsb4x       | 6,26538574 | 0,00050022 | 0,00234177 |
| NM_007557   | chr2  | 172512624 | 172583232 | Bmp7         | 6,26087082 | 0,00357563 | 0,00704442 |
| AK012702    | chr3  | 126589352 | 126835141 | Camk2d       | 6,25659044 | 0,00013388 | 0,0013321  |
| NM_00102491 | chr10 | 84185846  | 84336335  | Rfx4         | 6,255304   | 0,0119219  | 0,01696381 |
| NM_008711   | chr11 | 89117411  | 89118110  | Nog          | 6,23788375 | 0,00171646 | 0,00449545 |
| BC024118    | chr14 | 58579954  | 58585768  | Tmem46       | 6,22309959 | 0,00072061 | 0,00278211 |
| BC021888    | chr4  | 94542206  | 94544174  | Jun          | 6,21483749 | 0,00038884 | 0,00206033 |
| NM_021377   | chr19 | 50204283  | 50731796  | Sorcs1       | 6,20129706 | 0,00272732 | 0,00590684 |
| NM_008542   | chr9  | 63751142  | 63819327  | Smad6        | 6,19689991 | 2,12E-05   | 0,00069344 |
| NM_010784   | chr2  | 91730659  | 91733121  | Mdk          | 6,19606953 | 0,00108386 | 0,00347231 |
| BC020060    | chr8  | 126549210 | 126549968 | Rhou         | 6,19133276 | 8,14E-05   | 0,00111548 |
| AY493377    | chr13 | 55165063  | 55178326  | Fgfr4        | 6,18951629 | 0,00027031 | 0,00176127 |
| NM_011804   | chr1  | 167600454 | 167611979 | Creg1        | 6,18738583 | 0,00033451 | 0,0019437  |
| BC055047    | chr15 | 10897095  | 10924479  | C1qtnf3      | 6,18458447 | 0,00510533 | 0,00903453 |
| NM_026667   | chr5  | 65249246  | 65321009  | 9130005N14R  | 6,18312712 | 0,00039492 | 0,00207066 |
| BC003224    | chr14 | 71888348  | 71916832  | Rcctb2       | 6,17031154 | 0,00025063 | 0,00170185 |
| NM_009018   | chr10 | 21863317  | 21873333  | Raet1c       | 6,163458   | 0,00222799 | 0,00518298 |
| NM_133955   | chr8  | 126540018 | 126549970 | Rhou         | 6,15705305 | 9,75E-05   | 0,00116005 |
| BC012667    | chr16 | 49775356  | 49831307  | Cd47         | 6,1429714  | 0,00064233 | 0,00263563 |
| AK033005    | chr9  | 116426722 | 117100824 | Rbms3        | 6,12238315 | 3,44E-05   | 0,00083399 |
| AK161427    | chr14 | 30203940  | 30246686  | Sh3bp5       | 6,11907395 | 0,00039103 | 0,00206206 |
| NM_183390   | chr16 | 19860059  | 19896520  | Klhl6        | 6,10725182 | 0,00118316 | 0,00366352 |
| NM_010603   | chr11 | 60881998  | 60887324  | Kcnj12       | 6,10128589 | 0,00854101 | 0,01300676 |
| BC103524    | chr7  | 96956967  | 97180228  | Gab2         | 6,09001874 | 0,00016249 | 0,00142469 |
| NM_175937   | chr5  | 43522206  | 43574438  | Cpeb2        | 6,07218888 | 0,00708337 | 0,01133421 |
| NM_177130   | chr3  | 85955772  | 85973320  | Glt28d2      | 6,05613207 | 0,00342997 | 0,00683063 |
| AK020881    | chr10 | 12191544  | 12305081  | Utrn         | 6,04385899 | 0,00421607 | 0,00789195 |
| NM_177092   | chr10 | 120184159 | 120274211 | Msrb3        | 6,04052244 | 0,00043734 | 0,00220595 |
| NM_011718   | chr15 | 98599795  | 98606184  | Wnt10b       | 6,03371548 | 0,00178628 | 0,00459136 |
| AK016466    | chr8  | 70832636  | 70880868  | 4931420C21R  | 6,03140174 | 0,0064498  | 0,010605   |
| BC019636    | chr15 | 10897096  | 10924426  | C1qtnf3      | 6,02562128 | 0,00451931 | 0,00826761 |
| NM_021427   | chr7  | 92955110  | 92956914  | A830059I20Ri | 6,020208   | 0,00048971 | 0,00232615 |
| AF314149    | chr16 | 34914610  | 34921110  | Mylk         | 5,99616465 | 0,00520439 | 0,00913143 |
| AK162717    | chr10 | 67513591  | 67531934  | Arid5b       | 5,99400381 | 0,00049712 | 0,0023374  |
| AK085821    | chr16 | 24903201  | 24904216  | Lpp          | 5,99390686 | 8,41E-05   | 0,00112072 |
| BC085321    | chr16 | 24363505  | 24896344  | Lpp          | 5,99362989 | 0,00043213 | 0,00219089 |
| XM_131700   | chr4  | 128275388 | 128308416 | BC039093     | 5,98626716 | 0,00022359 | 0,00162319 |
| NM_133859   | chr3  | 103864454 | 103867062 | Olfml3       | 5,98351538 | 0,00051317 | 0,00235349 |
| AK031708    | chr5  | 119931333 | 119934280 | Tbx3         | 5,98160786 | 0,00030815 | 0,00186288 |
| AK080930    | chrX  | 154971512 | 155318526 | Sh3kbp1      | 5,9776427  | 4,58E-05   | 0,00091118 |

|             |       |           |           |              |            |            |            |
|-------------|-------|-----------|-----------|--------------|------------|------------|------------|
| AF387630    | chr2  | 129987379 | 130061907 | Ebf4         | 5,9765379  | 0,00079275 | 0,00293444 |
| NM_177165   | chr3  | 59239072  | 59241425  | F630111L10Ri | 5,97623412 | 0,0008201  | 0,00297684 |
| NM_177354   | chr12 | 87567802  | 87581194  | Vash1        | 5,97121011 | 0,00028122 | 0,00179894 |
| AK046197    | chr9  | 116426722 | 117478611 | Rbms3        | 5,96235937 | 0,00043014 | 0,00218625 |
| NM_181318   | chr5  | 99457730  | 99493120  | Rasgef1b     | 5,96190478 | 0,00015237 | 0,00138265 |
| NM_133229   | chr16 | 94437217  | 94445733  | Dscr6        | 5,95316412 | 0,00329421 | 0,00666895 |
| NM_016889   | chr2  | 145913551 | 145916461 | Insm1        | 5,95081252 | 0,00819842 | 0,01263676 |
| NM_173419   | chr14 | 61230338  | 61247073  | Dleu7        | 5,94875048 | 0,0052451  | 0,00918933 |
| DQ133464    | chr17 | 25522466  | 25524568  | Metrn        | 5,92522525 | 0,0005176  | 0,00235866 |
| NM_134131   | chr18 | 50178849  | 50217109  | Tnfaip8      | 5,92484194 | 0,00050504 | 0,00234312 |
| XM_989657   | chr18 | 52893359  | 52895024  | A730036E13R  | 5,92110594 | 0,00473971 | 0,00857346 |
| XM_125935   | chr10 | 128287494 | 128294634 | Gdf11        | 5,92049034 | 0,00116657 | 0,00363298 |
| NM_053117   | chr18 | 80209010  | 80281439  | Pard6g       | 5,92029884 | 0,00202807 | 0,0049413  |
| NM_010570   | chr1  | 82115633  | 82170440  | Irs1         | 5,90699067 | 0,00044118 | 0,00221563 |
| BC016608    | chr17 | 62371066  | 62372461  | N/A          | 5,90398886 | 0,00528674 | 0,00924869 |
| NM_009124   | chr13 | 45565864  | 45975948  | Atxn1        | 5,87905116 | 0,0004473  | 0,00232352 |
| XM_977895   | chr1  | 172137820 | 172143007 | LOC665574    | 5,87628078 | 0,00203825 | 0,00495532 |
| AK015929    | chr5  | 77915393  | 77917144  | C530008M17R  | 5,87195129 | 0,00853323 | 0,01300489 |
| BC021879    | chr1  | 57719470  | 57891510  | 2810022L02Ri | 5,87116445 | 0,00121842 | 0,00371953 |
| NM_052011   | chr13 | 31814299  | 31812036  | Foxc1        | 5,86877745 | 0,00966639 | 0,01437182 |
| AK052196    | chr9  | 116427216 | 117101161 | Rbms3        | 5,85651869 | 0,0002076  | 0,00156477 |
| NM_013690   | chr4  | 94231317  | 94366957  | Tek          | 5,85520629 | 0,00881562 | 0,01331949 |
| NM_178665   | chr16 | 24308838  | 24896379  | Lpp          | 5,85378598 | 0,00041624 | 0,00213199 |
| NM_134093   | chr15 | 100297127 | 100307198 | Letmd1       | 5,851717   | 9,30E-06   | 0,00054925 |
| NM_016861   | chr19 | 40275549  | 40324844  | Pdlim1       | 5,85159532 | 0,00141213 | 0,00403794 |
| AB007811    | chr2  | 102507287 | 102582582 | Slc1a2       | 5,84656802 | 0,00037463 | 0,00204961 |
| XM_00100481 | chr9  | 103417296 | 103424041 | 4932413F04Ri | 5,8434349  | 0,01287496 | 0,01808683 |
| BC055002    | chr18 | 43333007  | 43444012  | Stk32a       | 5,83745693 | 0,00757824 | 0,01193383 |
| AK041098    | chr9  | 116427212 | 117101181 | Rbms3        | 5,83450394 | 0,00017822 | 0,00146584 |
| AK006878    | chr2  | 74513964  | 74516823  | 1700109F18Ri | 5,82048753 | 0,00404938 | 0,00771311 |
| BC050858    | chr5  | 99457728  | 99493162  | Rasgef1b     | 5,81580944 | 0,00048378 | 0,00231297 |
| NM_173404   | chr5  | 99094740  | 99120430  | Bmp3         | 5,81122911 | 0,00444773 | 0,00819956 |
| NM_018884   | chr6  | 101115711 | 101343995 | Pdzrn3       | 5,80932281 | 7,68E-05   | 0,00108714 |
| NM_010248   | chr7  | 96956942  | 97180228  | Gab2         | 5,8083699  | 0,00014567 | 0,00136125 |
| BC055859    | chr15 | 10897115  | 10924473  | C1qtnf3      | 5,79949253 | 0,00367674 | 0,00718477 |
| BC038077    | chr2  | 18590196  | 18593984  | Comm3        | 5,79783121 | 0,00020427 | 0,00154354 |
| AK029605    | chr2  | 9799104   | 9801774   | 4930412O13R  | 5,7763974  | 0,00307545 | 0,0063621  |
| NM_012061   | chr14 | 11165829  | 11616320  | Cadps        | 5,76197473 | 0,01128585 | 0,01625664 |
| XM_898128   | chr6  | 18451625  | 18464869  | Cttnbp2      | 5,7567318  | 0,00953484 | 0,01419393 |
| NM_177080   | chr1  | 139744580 | 139746684 | A130050O07R  | 5,7508691  | 0,01335933 | 0,01864426 |
| NM_133218   | chr3  | 9410095   | 9593158   | Gig1         | 5,74900918 | 7,29E-06   | 0,00053713 |
| BC068305    | chr4  | 153999285 | 154066335 | Ski          | 5,73547644 | 0,00038728 | 0,00206033 |
| NM_016678   | chr4  | 43896699  | 43965620  | Reck         | 5,73449589 | 0,00052993 | 0,00239351 |
| NM_080285   | chr6  | 18316477  | 18464825  | Cttnbp2      | 5,72914559 | 0,00028304 | 0,00180481 |
| BC053741    | chr14 | 30202974  | 30265042  | Sh3bp5       | 5,72554622 | 0,00167748 | 0,00443903 |
| BC007486    | chr19 | 50204286  | 50305989  | Sorcs1       | 5,72345645 | 0,0015239  | 0,00419848 |
| BC055439    | chr2  | 156466918 | 156473097 | MyI9         | 5,72176403 | 0,00070229 | 0,00277023 |
| NM_010664   | chr15 | 101856258 | 101860055 | Krt1-18      | 5,71963599 | 0,00029603 | 0,00183847 |
| BC082335    | chr13 | 59463472  | 59554062  | Agtpbbp1     | 5,71872422 | 1,53E-05   | 0,00062615 |
| BC109183    | chr4  | 128639367 | 128644920 | Fndc5        | 5,71728417 | 0,00017367 | 0,00145326 |
| AK043347    | chr12 | 71174177  | 71177677  | Trim9        | 5,71493332 | 0,00307251 | 0,00636017 |
| BC050915    | chr16 | 45665727  | 45763571  | Phldb2       | 5,7116596  | 0,00241949 | 0,00546815 |
| XM_129042   | chr18 | 77660559  | 77770607  | Gm96         | 5,7019287  | 0,00072679 | 0,00279016 |
| NM_0010379C | chr15 | 6333991   | 6386845   | Dab2         | 5,69563489 | 8,22E-06   | 0,00054898 |
| NM_177364   | chr11 | 32247810  | 32328183  | G431001E03R  | 5,68566856 | 2,60E-05   | 0,00079427 |
| BC024955    | chr7  | 99261240  | 99335064  | Gdprd5       | 5,68531388 | 0,00011158 | 0,00122967 |
| NM_0010334C | chr14 | 24292522  | 24295571  | D930049A15R  | 5,68519566 | 6,15E-05   | 0,00102496 |
| BC043329    | chr7  | 92955121  | 92956911  | A830059I20Ri | 5,68132198 | 0,00065521 | 0,00266481 |
| NM_015771   | chr14 | 56643771  | 56700233  | Lats2        | 5,68066568 | 0,00520138 | 0,00912883 |
| NM_008453   | chr5  | 65082657  | 65109264  | Klf3         | 5,67228492 | 6,40E-05   | 0,00102744 |
| NM_0010019E | chr5  | 67025083  | 67335232  | 3732412D22R  | 5,65783459 | 0,00639337 | 0,0105442  |
| BC006588    | chr15 | 6364020   | 6386845   | Dab2         | 5,65569113 | 5,69E-06   | 0,00053609 |
| BC027280    | chr16 | 52170270  | 52372002  | Alcam        | 5,65567806 | 0,0051712  | 0,00910172 |
| AK142435    | chr3  | 126589031 | 126832481 | Camk2d       | 5,65494634 | 7,04E-05   | 0,00105565 |
| AK163339    | chr18 | 50104858  | 50218559  | Tnfaip8      | 5,65447599 | 0,00440133 | 0,00814171 |
| NM_00102447 | chr13 | 52516811  | 52543086  | Diras2       | 5,64561207 | 0,00491239 | 0,00880038 |
| NM_177263   | chr2  | 160461887 | 160564431 | Zhx3         | 5,63759563 | 3,09E-05   | 0,00083399 |
| NM_146168   | chr6  | 57681841  | 57754703  | AW146242     | 5,63255697 | 0,00076338 | 0,00287693 |
| NM_0010404C | chr3  | 133401144 | 133481674 | E130014J05Ri | 5,62294785 | 0,00033075 | 0,00193517 |
| XM_00100444 | chr10 | 121188301 | 121450253 | Srgap1       | 5,621454   | 4,21E-05   | 0,0008919  |
| BC110359    | chr5  | 65249208  | 65320984  | 9130005N14R  | 5,61945415 | 0,0003084  | 0,00186288 |
| AK140095    | chr2  | 102459527 | 102582579 | Slc1a2       | 5,61767567 | 0,00028502 | 0,00181348 |
| NM_011993   | chr7  | 138937392 | 138953088 | Dpysl4       | 5,61242139 | 0,0005074  | 0,00247984 |
| BC110478    | chr6  | 143790189 | 144166611 | Sox5         | 5,61054143 | 0,00041146 | 0,00212047 |
| NM_172442   | chr19 | 12533380  | 12568499  | Dtx4         | 5,60367519 | 0,00544486 | 0,00942848 |
| NM_181326   | chr18 | 13831384  | 13987578  | Zfp521       | 5,60230295 | 0,00078477 | 0,00292608 |

|             |       |           |           |              |            |            |            |
|-------------|-------|-----------|-----------|--------------|------------|------------|------------|
| BC031159    | chr3  | 133403171 | 133409123 | E130014J05Ri | 5,60126752 | 0,00086326 | 0,0030587  |
| BC056138    | chr16 | 44404376  | 44416541  | Boc          | 5,59759329 | 0,00642404 | 0,0105743  |
| NM_008037   | chr5  | 32413114  | 32434421  | Fosl2        | 5,59474871 | 0,00406865 | 0,0077351  |
| BC094009    | chr15 | 101824744 | 101832340 | Krt2-8       | 5,58533314 | 7,84E-05   | 0,00109904 |
| NM_00103705 | chr2  | 25877544  | 25914405  | Btbd14a      | 5,57516048 | 1,09E-05   | 0,00056386 |
| AF401550    | chr10 | 67491810  | 67531983  | Arid5b       | 5,5613559  | 0,00082168 | 0,00297684 |
| NM_021389   | chrX  | 155052705 | 155318272 | Sh3kbp1      | 5,55936459 | 1,94E-05   | 0,00067238 |
| NM_009029   | chr14 | 71929655  | 72059895  | Rb1          | 5,54198703 | 0,00742625 | 0,01174932 |
| BC046314    | chr8  | 105522613 | 105674140 | Cdh11        | 5,53401543 | 0,00321761 | 0,00656741 |
| AK034880    | chr3  | 98467885  | 98515417  | Zfp697       | 5,53300541 | 2,70E-05   | 0,00080751 |
| XM_355606   | chr5  | 74471918  | 74481181  | Rasl11b      | 5,53231512 | 0,00100066 | 0,00335164 |
| NM_010581   | chr16 | 49775279  | 49831314  | Cd47         | 5,53188053 | 0,00064854 | 0,0026518  |
| BC069991    | chr14 | 71972186  | 71973936  | P2ry5        | 5,52901825 | 0,00035468 | 0,00199684 |
| NM_009522   | chr11 | 59064230  | 59106946  | Wnt3a        | 5,5209505  | 9,94E-05   | 0,00116936 |
| BC066006    | chr10 | 79267910  | 79277358  | BC005764     | 5,52036375 | 0,0062949  | 0,01041926 |
| AK051191    | chr13 | 57438331  | 57917914  | Spock1       | 5,50967288 | 0,01398728 | 0,01930284 |
| BC107325    | chr9  | 111406766 | 111535029 | Stac         | 5,50272666 | 0,00278855 | 0,00598248 |
| NM_010773   | chr18 | 70693556  | 70751499  | Mbd2         | 5,50048945 | 0,00033745 | 0,00194858 |
| NM_198678   | chr8  | 64116350  | 64288213  | Sh3rf1       | 5,49502737 | 0,00066182 | 0,00267511 |
| NM_023328   | chr13 | 59459517  | 59566909  | Agtpbbp1     | 5,48751635 | 3,93E-05   | 0,000881   |
| AK154829    | chr8  | 123423405 | 123465303 | Gse1         | 5,47630703 | 0,00079844 | 0,00294539 |
| AK162095    | chr4  | 32830115  | 32832264  | Bach2        | 5,45968103 | 0,00012335 | 0,00129022 |
| NM_053137   | chr18 | 37561776  | 37564146  | Pcdhb12      | 5,44940985 | 0,00126192 | 0,00379403 |
| NM_175116   | chr14 | 71972049  | 71974957  | P2ry5        | 5,44680418 | 0,00418043 | 0,00784504 |
| NM_152993   | chr2  | 129987379 | 130061907 | Ebf4         | 5,44492936 | 0,00080782 | 0,00296202 |
| NM_008035   | chr7  | 101713808 | 101731011 | Folr2        | 5,43295338 | 0,00542968 | 0,00941303 |
| NM_175270   | chr5  | 94116374  | 94120155  | 5730467H21R  | 5,41832401 | 0,00056448 | 0,00245116 |
| AK028684    | chr8  | 70719458  | 70991275  | 4931420C21R  | 5,40968029 | 0,01051229 | 0,01536511 |
| BC014764    | chr1  | 57790116  | 57891510  | 2810022L02Ri | 5,40873045 | 0,0012533  | 0,00377382 |
| XM_486185   | chr9  | 13367585  | 13459930  | Maml2        | 5,40172427 | 0,00121409 | 0,0037101  |
| BC053007    | chr3  | 18246475  | 18249664  | Bhlhb5       | 5,40061361 | 0,00246217 | 0,00553315 |
| NM_011444   | chr6  | 143790050 | 144166639 | Sox5         | 5,39365533 | 0,000722   | 0,00278211 |
| BC052034    | chr12 | 71184754  | 71266219  | Trim9        | 5,39289521 | 0,0010703  | 0,00345308 |
| BC047931    | chr14 | 71972169  | 71974003  | P2ry5        | 5,38805035 | 0,00039118 | 0,00206206 |
| NM_013519   | chr8  | 124002559 | 124004872 | Foxc2        | 5,38328448 | 0,0039144  | 0,00754043 |
| AK045272    | chr13 | 53479040  | 53480116  | N/A          | 5,3769324  | 5,47E-07   | 0,00029564 |
| NM_008727   | chr3  | 90536518  | 90552265  | Npr1         | 5,37329359 | 0,00350561 | 0,00694366 |
| NM_175184   | chr2  | 33551964  | 33709955  | 2610528K11R  | 5,36962002 | 7,63E-05   | 0,00108714 |
| NM_030708   | chr3  | 5224744   | 5397584   | Zfx4         | 5,36328406 | 0,00137923 | 0,0039814  |
| NM_008034   | chr7  | 101732151 | 101744504 | Folr1        | 5,36042232 | 0,00877242 | 0,01326431 |
| NM_023476   | chr4  | 129668022 | 129677426 | Tinagl       | 5,35845343 | 0,00902827 | 0,01357884 |
| BC066788    | chr17 | 67747658  | 67909043  | Arhgap28     | 5,33052144 | 0,0056569  | 0,00968315 |
| NM_181681   | chr10 | 79267909  | 79277763  | BC005764     | 5,32876053 | 0,00726165 | 0,01154505 |
| AK081921    | chr9  | 116696944 | 117101177 | Rbms3        | 5,32526505 | 0,00073861 | 0,00282146 |
| BC057866    | chr2  | 60553578  | 60682309  | Rbms1        | 5,32286632 | 4,55E-05   | 0,00091118 |
| NM_031397   | chr10 | 70320385  | 70554934  | Bicc1        | 5,31640127 | 0,00010726 | 0,00121341 |
| NM_023438   | chr11 | 82205094  | 82262522  | Tmem132e     | 5,30793241 | 0,00377663 | 0,00734232 |
| XM_901576   | chr16 | 33932880  | 34137755  | Kalrn        | 5,30432804 | 3,65E-05   | 0,00085724 |
| AK138159    | chr11 | 109051122 | 109114180 | Rgs9         | 5,29625775 | 0,00464371 | 0,00845048 |
| BC016884    | chr2  | 80212808  | 80248082  | Frzb         | 5,28727122 | 0,00028666 | 0,00181624 |
| NM_007548   | chr10 | 44125591  | 44147163  | Prdm1        | 5,27848287 | 0,00105877 | 0,00343065 |
| NM_013601   | chr13 | 53475419  | 53480608  | Msx2         | 5,27166977 | 0,00210596 | 0,00501057 |
| NM_144537   | chr6  | 30561019  | 30581531  | Cpa5         | 5,27164541 | 0,00321436 | 0,00656303 |
| NM_145492   | chr18 | 13831383  | 14115932  | Zfp521       | 5,26535207 | 0,00049695 | 0,0023374  |
| NM_010298   | chr3  | 80929530  | 80999551  | Glr3         | 5,26082843 | 0,00636216 | 0,01049854 |
| NM_144882   | chr1  | 57719473  | 57892940  | 2810022L02Ri | 5,25391672 | 0,0020593  | 0,00497067 |
| NM_00100542 | chr1  | 72092652  | 72145515  | Wdt2         | 5,24033848 | 6,79E-05   | 0,00103864 |
| NM_178773   | chr10 | 88378792  | 88687589  | Tmem16d      | 5,23974523 | 0,00444124 | 0,00819519 |
| D28529      | chr5  | 103790078 | 103838653 | Ptpn13       | 5,23431229 | 5,38E-06   | 0,00053609 |
| NM_013555   | chr2  | 74498601  | 74501047  | Hoxd9        | 5,23426391 | 0,00995277 | 0,01470957 |
| BC107279    | chr10 | 61134532  | 61153300  | H2afy2       | 5,23263151 | 0,00190696 | 0,004773   |
| AK052232    | chr2  | 124301546 | 124354326 | Sema6d       | 5,22923534 | 0,00796963 | 0,01240274 |
| NM_153153   | chr18 | 5046587   | 5119288   | Svil         | 5,22473066 | 0,00081385 | 0,00297679 |
| BC008101    | chr5  | 74476992  | 74481177  | Rasl11b      | 5,21373287 | 0,00154683 | 0,00422843 |
| BC023870    | chr7  | 73264739  | 73293411  | Rgma         | 5,21075829 | 0,00073937 | 0,00282146 |
| NM_031881   | chr18 | 65149262  | 65338676  | Nedd4l       | 5,21015635 | 0,00453773 | 0,00829144 |
| NM_009162   | chr2  | 113577205 | 113629965 | Scg5         | 5,20426106 | 0,00408639 | 0,00775893 |
| AK051399    | chr15 | 26784973  | 26786379  | N/A          | 5,18888058 | 0,00447954 | 0,00823422 |
| NM_009785   | chr14 | 27731953  | 28548875  | Caena2d3     | 5,18560865 | 0,0005088  | 0,00234789 |
| NM_008609   | chr8  | 98241465  | 98263422  | Mmp15        | 5,18117747 | 0,00479239 | 0,00863732 |
| AK134790    | chr19 | 19004664  | 19177984  | Rorb         | 5,16979354 | 0,00089088 | 0,00311157 |
| AK037703    | chr2  | 76207396  | 76397435  | Osbpl6       | 5,16115276 | 0,00305531 | 0,00634475 |
| NM_00103487 | chr11 | 66027923  | 66342321  | Gm879        | 5,15178838 | 0,00048243 | 0,00231284 |
| NM_008083   | chr16 | 42167883  | 42259983  | Gap43        | 5,1503483  | 0,00033484 | 0,0019437  |
| BC079673    | chr17 | 81295879  | 81557934  | Slc8a1       | 5,13777365 | 0,00473968 | 0,00857346 |
| NM_012028   | chr3  | 152757271 | 152919596 | St6galnac5   | 5,12967231 | 0,00586353 | 0,00990602 |

|             |       |           |           |              |            |            |            |
|-------------|-------|-----------|-----------|--------------|------------|------------|------------|
| BC025425    | chr4  | 58529317  | 58647246  | Edg2         | 5,11076764 | 0,00074797 | 0,00283677 |
| BC037696    | chr3  | 81123166  | 81299956  | Pdgc         | 5,09826607 | 0,00893221 | 0,01347516 |
| AK051776    | chr9  | 116526970 | 117101180 | Rbms3        | 5,09332108 | 0,00098279 | 0,00332351 |
| NM_011204   | chr5  | 103702434 | 103838654 | Ptprn13      | 5,0896978  | 4,04E-05   | 0,00088503 |
| BC010329    | chr6  | 101115712 | 101135314 | Pdzrn3       | 5,0859831  | 5,64E-05   | 0,00100585 |
| AB206790    | chr5  | 112662115 | 112817480 | Sez6l        | 5,08594784 | 0,01427946 | 0,01964332 |
| NM_183318   | chrX  | 98269269  | 98273915  | Rgag4        | 5,0735656  | 0,00021321 | 0,00158335 |
| BC046778    | chr11 | 61593170  | 61671245  | ULK2         | 5,06474629 | 0,00044015 | 0,00221264 |
| AK081096    | chr18 | 13830184  | 13988212  | Zfp521       | 5,04984813 | 0,0053403  | 0,00930821 |
| NM_008783   | chr1  | 169956673 | 170268631 | Pbx1         | 5,04527649 | 0,0009989  | 0,00334951 |
| XM_194000   | chr2  | 3035659   | 3145081   | 9630050M13R  | 5,04176893 | 0,00030461 | 0,00185692 |
| NM_009373   | chr2  | 157807845 | 157837833 | Tgm2         | 5,04045277 | 0,00020163 | 0,00153257 |
| AK133955    | chr18 | 77666162  | 77672729  | Gm96         | 5,03984722 | 0,00128919 | 0,00383731 |
| NM_053142   | chr18 | 37610992  | 37614264  | Pcdhb17      | 5,03918353 | 0,0114717  | 0,01644093 |
| NM_008842   | chr17 | 29217823  | 29222468  | Pim1         | 5,03394691 | 0,00283793 | 0,00604708 |
| XM_977373   | chr18 | 10325176  | 10562939  | AK220484     | 5,03040073 | 4,16E-05   | 0,000887   |
| NM_172604   | chr14 | 64873504  | 64907854  | Scara3       | 5,02616024 | 0,00556649 | 0,00956686 |
| NM_016780   | chr11 | 104424145 | 104483465 | Itgb3        | 5,0146882  | 0,00209055 | 0,00500757 |
| NM_019877   | chr11 | 96665965  | 96677293  | Copz2        | 5,006191   | 0,00130688 | 0,00386872 |
| NM_029394   | chr18 | 53371030  | 53516206  | Snx24        | 5,00117354 | 0,00245551 | 0,00153242 |
| AK007904    | chr6  | 127113918 | 127116626 | Ccnd2        | 4,9885251  | 0,00684749 | 0,01106061 |
| XM_135854   | chrX  | 45715076  | 45744877  | 1100001E04R  | 4,98754549 | 0,0002512  | 0,00170382 |
| BC083068    | chr5  | 74477022  | 74481172  | Rasl11b      | 4,97780598 | 0,00087246 | 0,00307971 |
| NM_009621   | chr16 | 85683022  | 85692295  | Adamts1      | 4,97320764 | 0,00357744 | 0,00704442 |
| AK166503    | chr6  | 53216862  | 53324255  | 9430076C15R  | 4,9692909  | 0,01049553 | 0,01534437 |
| NM_175259   | chr1  | 137187866 | 137191474 | Tmem58       | 4,96640988 | 0,00080283 | 0,0029513  |
| NM_152803   | chr5  | 100920697 | 100959985 | Hpse         | 4,96248704 | 0,00014617 | 0,0013617  |
| NM_172964   | chr17 | 67747657  | 67909003  | Arhgap28     | 4,95285368 | 0,0040027  | 0,0076626  |
| AK162008    | chr16 | 34872804  | 34920338  | Mylk         | 4,91860773 | 0,00259532 | 0,00573462 |
| NM_011763   | chr6  | 118427592 | 118444877 | Zfp9         | 4,91297421 | 0,00386882 | 0,00747437 |
| NM_054044   | chr8  | 28551776  | 28589358  | Gpr124       | 4,91231588 | 0,00040698 | 0,00210628 |
| AJ243658    | chrX  | 96178376  | 96601686  | Eda          | 4,90704103 | 0,00019276 | 0,00150596 |
| XM_622639   | chr16 | 34138405  | 34182841  | Kalrn        | 4,90612276 | 0,0000604  | 0,00253772 |
| NM_177740   | chr7  | 73249019  | 73293410  | Rgma         | 4,90088853 | 0,00017854 | 0,00146584 |
| NM_019391   | chr7  | 142281232 | 142303989 | Lsp1         | 4,89765109 | 0,00789078 | 0,01232508 |
| NM_027797   | chr7  | 141179449 | 141188131 | Tmem80       | 4,89459673 | 0,00135608 | 0,00395876 |
| BC057642    | chr2  | 172036821 | 172045093 | 2010011I20Ri | 4,89045942 | 1,60E-05   | 0,00063799 |
| BC052161    | chr3  | 114022594 | 114211321 | Col11a1      | 4,88804195 | 0,00040535 | 0,00210067 |
| XM_902438   | chr14 | 77304123  | 77378606  | Dgkh         | 4,87250388 | 0,00161931 | 0,00435271 |
| NM_153534   | chr13 | 69087430  | 69466658  | Adcy2        | 4,86197789 | 0,00405212 | 0,00771352 |
| BC011139    | chr11 | 5800825   | 5815127   | Gck          | 4,85839571 | 0,00053308 | 0,00239637 |
| NM_007461   | chr7  | 64380655  | 64632820  | Apba2        | 4,84858351 | 0,01220568 | 0,0172892  |
| NM_009152   | chr5  | 13405314  | 13608571  | Sema3a       | 4,84365687 | 0,00811132 | 0,01257076 |
| AK138844    | chr16 | 24465256  | 24466487  | N/A          | 4,84166524 | 0,00673037 | 0,01095002 |
| BC065160    | chr18 | 32520254  | 32578746  | Bin1         | 4,84054671 | 8,91E-05   | 0,00112072 |
| NM_00100845 | chr3  | 59202553  | 59218553  | P2ry14       | 4,8370362  | 0,00055272 | 0,00242481 |
| AK082124    | chr3  | 126776035 | 126800507 | Camk2d       | 4,82503698 | 0,00010244 | 0,0011857  |
| NM_080563   | chr12 | 26893332  | 27001492  | Rnf144       | 4,8164605  | 0,00081021 | 0,00296895 |
| NM_029761   | chr2  | 170423144 | 170570973 | Dok5         | 4,80662194 | 0,00174287 | 0,0045198  |
| BC005738    | chr4  | 129667909 | 129677074 | Tinagl       | 4,80386852 | 0,01164507 | 0,01664539 |
| NM_025833   | chr5  | 144518055 | 144611639 | Baiap2l1     | 4,79404461 | 0,00015656 | 0,00140094 |
| AK006008    | chr8  | 123422868 | 123423703 | 1700016A09R  | 4,79402246 | 0,00337481 | 0,00675892 |
| AK088732    | chr16 | 33932892  | 34015775  | Kalrn        | 4,79189623 | 2,16E-06   | 0,00044396 |
| XM_980313   | chr16 | 11897725  | 12183527  | 2700045P11Ri | 4,78369917 | 0,01338778 | 0,01867523 |
| NM_053128   | chr18 | 37426956  | 37429953  | Pcdhb3       | 4,78056124 | 0,00977178 | 0,01449598 |
| BC059273    | chr6  | 118427595 | 118442975 | Zfp9         | 4,77424742 | 0,00375677 | 0,007313   |
| XM_989634   | chr6  | 67003198  | 67010235  | E230016M11R  | 4,77237254 | 0,00682989 | 0,01104116 |
| BC021378    | chr7  | 87122572  | 87274086  | Nox4         | 4,76957263 | 0,00233067 | 0,00533211 |
| BC023001    | chr1  | 145763209 | 145766350 | Rgs2         | 4,76844871 | 0,00411668 | 0,00779251 |
| AK143869    | chr3  | 87196528  | 87198147  | N/A          | 4,76717086 | 3,88E-05   | 0,000881   |
| BC021656    | chrX  | 95338876  | 95350297  | Efnb1        | 4,76551897 | 0,00454336 | 0,00829767 |
| NM_011039   | chr4  | 139010156 | 139105044 | Pax7         | 4,76078673 | 0,01413381 | 0,01949244 |
| NM_00100118 | chr2  | 59700201  | 59926579  | Baz2b        | 4,751007   | 0,00059467 | 0,00252703 |
| NM_153572   | chr5  | 149186414 | 149238967 | Katnal1      | 4,74536809 | 9,43E-05   | 0,00115002 |
| D83966      | chr5  | 103665802 | 103838605 | Ptprn13      | 4,73892556 | 0,00030276 | 0,00185674 |
| BC051636    | chr14 | 64873504  | 64907627  | Scara3       | 4,73703172 | 0,00254852 | 0,00566739 |
| AK151922    | chr16 | 49775333  | 49830709  | Cd47         | 4,73461353 | 0,00128606 | 0,00383183 |
| AY182231    | chr1  | 135149420 | 135157446 | Kiss1        | 4,7329073  | 0,00573009 | 0,00974965 |
| AK132312    | chr13 | 69087437  | 69466913  | Adcy2        | 4,7326886  | 0,00131381 | 0,00387962 |
| NM_019971   | chr3  | 81122342  | 81299958  | Pdgc         | 4,72666734 | 0,00471712 | 0,0085494  |
| BC024584    | chr1  | 163819134 | 164132313 | Dnm3         | 4,72662366 | 0,00088344 | 0,00310009 |
| NM_027496   | chr15 | 31241252  | 31312154  | 5730557B15R  | 4,71280722 | 4,22E-06   | 0,00049484 |
| BC075615    | chr3  | 159774987 | 159870369 | Gpr177       | 4,7088018  | 8,36E-05   | 0,00112072 |
| BC011135    | chr1  | 134126606 | 134133121 | Klhdc8a      | 4,70550643 | 0,00080239 | 0,0029513  |
| NM_008093   | chr2  | 180254540 | 180264081 | Gata5        | 4,69959576 | 0,0014992  | 0,00415926 |
| NM_172863   | chr3  | 98467952  | 98517112  | Zfp697       | 4,69734861 | 0,00096873 | 0,00329657 |

|             |       |           |           |              |            |            |            |
|-------------|-------|-----------|-----------|--------------|------------|------------|------------|
| BC116630    | chr9  | 72722944  | 72743120  | Pygo1        | 4,69718582 | 0,00123449 | 0,00374691 |
| AK145638    | chr7  | 138940566 | 138953097 | Dpysl4       | 4,69329128 | 0,0014615  | 0,00410237 |
| NM_026153   | chr15 | 31268545  | 31312143  | 5730557B15R  | 4,69181675 | 0,00117202 | 0,00364171 |
| NM_020296   | chr2  | 60553560  | 60763759  | Rbms1        | 4,69156743 | 4,32E-05   | 0,00089339 |
| NM_025912   | chr2  | 172036813 | 172046954 | 2010011I20Ri | 4,68609651 | 0,00016734 | 0,0014314  |
| AK148053    | chr17 | 5898023   | 5995037   | Synj2        | 4,68573923 | 0,00304602 | 0,00632764 |
| BC013560    | chr8  | 11443192  | 11449249  | Col4a2       | 4,68088071 | 0,00102322 | 0,00337061 |
| AK220260    | chr10 | 122081864 | 122345599 | Ppm1h        | 4,67896683 | 7,66E-05   | 0,00108714 |
| NM_0010333C | chr3  | 84529964  | 84566356  | 6330505N24R  | 4,67635137 | 0,00055812 | 0,00243773 |
| NM_00100842 | chr12 | 81674646  | 81679535  | Gm1568       | 4,67527102 | 0,00578489 | 0,00980094 |
| NM_00100981 | chr4  | 128261561 | 128271602 | A3galt2      | 4,67398574 | 0,00076934 | 0,00289022 |
| NM_016697   | chrX  | 48517052  | 48858548  | Gpc3         | 4,66327443 | 0,00013305 | 0,0013321  |
| BC003328    | chr17 | 34667140  | 34670149  | Ddah2        | 4,66107696 | 0,00011271 | 0,00123072 |
| NM_010415   | chr18 | 36630905  | 36641748  | Hbegf        | 4,65922499 | 3,10E-05   | 0,00083399 |
| XM_981889   | chr15 | 71627429  | 71863162  | Col22a1      | 4,65486717 | 0,01321226 | 0,01846495 |
| AK169423    | chr5  | 97033805  | 97066196  | LOC666734    | 4,65316819 | 0,00148798 | 0,0014227  |
| BC049774    | chr11 | 102420622 | 102424146 | Fzd2         | 4,64055277 | 0,00189561 | 0,00475321 |
| D67076      | chr16 | 85683712  | 85692295  | Adamts1      | 4,63879471 | 0,00272367 | 0,00590492 |
| NM_153573   | chr6  | 54507182  | 54522706  | Fkbp14       | 4,63862322 | 0,0001464  | 0,0013617  |
| XM_985689   | chr3  | 59090399  | 59094087  | LOC666734    | 4,63828028 | 0,00248231 | 0,00556418 |
| BC057867    | chr18 | 20173642  | 20202295  | Dsc2         | 4,63550548 | 0,00054247 | 0,00240821 |
| NM_016913   | chrX  | 7350808   | 7363466   | Porcn        | 4,63100934 | 0,00490259 | 0,00879074 |
| NM_213614   | chr16 | 18535373  | 18543501  | sept-05      | 4,6282282  | 0,00108264 | 0,00347212 |
| NM_016765   | chr17 | 34667156  | 34670151  | Ddah2        | 4,62674205 | 0,00014279 | 0,00135008 |
| AK149180    | chr11 | 53445290  | 53447667  | AW124694     | 4,62583348 | 0,00900147 | 0,01355221 |
| BC022756    | chr7  | 141179505 | 141188133 | Tmem80       | 4,62070611 | 0,0004582  | 0,00226331 |
| BC094239    | chr18 | 37644332  | 37647115  | Pcdhb22      | 4,61580838 | 0,00409069 | 0,00776216 |
| NM_146095   | chr19 | 19003590  | 19068140  | Rorb         | 4,61095845 | 0,00514228 | 0,00907586 |
| AK033903    | chr4  | 28981918  | 29115829  | Epha7        | 4,61037254 | 0,01043861 | 0,01527234 |
| NM_009929   | chr10 | 76495894  | 76610217  | Col18a1      | 4,61028733 | 0,000601   | 0,00253756 |
| AK148547    | chr2  | 150026785 | 150029224 | N/A          | 4,60831712 | 0,00038564 | 0,00206033 |
| BC052200    | chr10 | 102437841 | 102458447 | Cart1        | 4,6041452  | 0,00082002 | 0,00297684 |
| NM_183180   | chr2  | 93002598  | 93135289  | Tspan18      | 4,60265615 | 0,00033514 | 0,0019437  |
| AK004534    | chr5  | 74479587  | 74481169  | Ras111b      | 4,6023903  | 0,00297023 | 0,00623979 |
| BC054766    | chr4  | 86127936  | 86141203  | Adfp         | 4,58885218 | 0,00088495 | 0,00310014 |
| AK048262    | chr8  | 83693703  | 83695549  | N/A          | 4,58832208 | 0,00193073 | 0,00481377 |
| NM_010141   | chr4  | 28981939  | 29133870  | Epha7        | 4,58818427 | 0,00326245 | 0,00662491 |
| AK129270    | chr1  | 56738533  | 56917047  | Satb2        | 4,58714549 | 0,00199937 | 0,00490922 |
| BC018539    | chr4  | 129667909 | 129677091 | Tinagl       | 4,5862659  | 0,01276119 | 0,01794815 |
| BC066822    | chr2  | 170423011 | 170570973 | Dok5         | 4,58547123 | 0,00115262 | 0,00360919 |
| NM_030245   | chr1  | 168215974 | 168230296 | Tada1l       | 4,57832539 | 0,00032145 | 0,00190507 |
| NM_009932   | chr8  | 11312995  | 11449187  | Col4a2       | 4,57792343 | 0,00016825 | 0,00143675 |
| NM_010402   | chr8  | 60214045  | 60216006  | Hand2        | 4,55818665 | 0,003443   | 0,00684696 |
| AK162019    | chr6  | 114826246 | 114840726 | Vgll4        | 4,55653348 | 0,0008712  | 0,00307889 |
| NM_007628   | chr3  | 55133403  | 55142984  | Ccna1        | 4,55355507 | 0,00101328 | 0,00336247 |
| NM_007545   | chr5  | 118430793 | 118450508 | Hrk          | 4,54734144 | 0,00468648 | 0,00851074 |
| BC071264    | chr4  | 146974719 | 146989478 | Mad2l2       | 4,54422205 | 0,0007855  | 0,00292608 |
| XM_00100396 | chr2  | 75791970  | 76139492  | Pde11a       | 4,54188129 | 0,00048549 | 0,00231561 |
| BC040382    | chr16 | 85683958  | 85692295  | Adamts1      | 4,53065614 | 0,00138683 | 0,00399408 |
| BC004627    | chr3  | 104917112 | 104922515 | Rhoc         | 4,52479783 | 5,38E-05   | 0,00098481 |
| XM_484397   | chr14 | 77303763  | 77363445  | Dgkh         | 4,52266561 | 0,00407783 | 0,00774761 |
| NM_020514   | chr14 | 51372365  | 51373292  | Olfr1509     | 4,51841464 | 0,00724619 | 0,01152356 |
| AK149344    | chr10 | 44125589  | 44146982  | Pdrn1        | 4,5141155  | 0,00117889 | 0,00365498 |
| NM_010146   | chr10 | 11033593  | 11147912  | Epm2a        | 4,50870567 | 0,00478179 | 0,00862343 |
| NM_009668   | chr18 | 32520266  | 32578741  | Bin1         | 4,50378097 | 0,00012926 | 0,00131739 |
| NM_177774   | chr4  | 33537603  | 33561953  | Srrp         | 4,50089944 | 0,00022461 | 0,00162319 |
| NM_053127   | chr18 | 37420949  | 37423349  | Pcdhb2       | 4,49913191 | 0,00492714 | 0,0088215  |
| XM_136212   | chr1  | 120661606 | 120881165 | Gli2         | 4,49774956 | 0,00276087 | 0,00594035 |
| AK043135    | chr1  | 177499259 | 177529307 | Opn3         | 4,49550545 | 0,00134961 | 0,00395012 |
| NM_024217   | chr8  | 107229722 | 107236801 | Cmtm3        | 4,49089606 | 4,82E-06   | 0,00053199 |
| AK147212    | chr11 | 69582153  | 69600218  | Zbtb4        | 4,49062629 | 0,00211132 | 0,00501701 |
| BC002307    | chr1  | 168216039 | 168230293 | Tada1l       | 4,48961998 | 0,00024271 | 0,00169046 |
| BC058610    | chr16 | 34704696  | 34920340  | Mylk         | 4,47697212 | 0,00643751 | 0,01059355 |
| AK144380    | chr11 | 78642789  | 78657630  | 1810012P15Ri | 4,46899367 | 0,00140303 | 0,00402349 |
| NM_008538   | chr10 | 36824236  | 36828330  | Marcks       | 4,46695999 | 0,00089763 | 0,0031278  |
| XM_980776   | chr6  | 99400698  | 99488377  | LOC665995    | 4,46382355 | 0,00045772 | 0,0022628  |
| NM_174857   | chr19 | 23369705  | 23515419  | Mamdc2       | 4,45619799 | 0,00035766 | 0,00200601 |
| NM_007836   | chr6  | 66964673  | 66966985  | Gadd45a      | 4,45340865 | 0,00035087 | 0,00198928 |
| BC007166    | chr18 | 33921761  | 34131720  | Epb4.1l4a    | 4,44860601 | 0,00013211 | 0,00133144 |
| NM_013613   | chr2  | 56923541  | 56930641  | Nr4a2        | 4,44242268 | 0,00101302 | 0,00336247 |
| NM_007484   | chr3  | 104917107 | 104922515 | Rhoc         | 4,43891372 | 8,71E-05   | 0,00112072 |
| AK161467    | chr17 | 5964078   | 5994888   | Synj2        | 4,4334506  | 0,00269511 | 0,00586647 |
| BC103575    | chr10 | 30522917  | 30532139  | Hey2         | 4,43012273 | 0,00050247 | 0,00234312 |
| BC103798    | chr17 | 55563881  | 55569910  | Shd          | 4,42976449 | 1,58E-05   | 0,00063534 |
| NM_027402   | chr4  | 128639363 | 128646897 | Fndc5        | 4,42861833 | 0,0010602  | 0,00343155 |
| NM_023396   | chr2  | 53899478  | 53900938  | Rprm         | 4,42002134 | 0,00204678 | 0,00496052 |

|           |       |           |           |              |            |            |             |
|-----------|-------|-----------|-----------|--------------|------------|------------|-------------|
| BC048468  | chr13 | 59541530  | 59566920  | Agtpbp1      | 4,41930652 | 0,00054511 | 0,00241342  |
| XM_141580 | chr2  | 178340613 | 178343929 | Ppp1r3d      | 4,41256236 | 0,00143298 | 0,00405733  |
| XM_128578 | chr17 | 25605227  | 25608458  | Wfikkn1      | 4,41071742 | 0,0056885  | 0,00971214  |
| NM_173379 | chr16 | 25875671  | 26021133  | Lefprel1     | 4,41003468 | 0,00014826 | 0,00137186  |
| NM_011385 | chr4  | 154001140 | 154066320 | Ski          | 4,40895474 | 0,00285438 | 0,00606695  |
| AK031598  | chr16 | 23383696  | 23435984  | Masp1        | 4,40713167 | 0,00395303 | 0,00759767  |
| XM_886913 | chr6  | 83328030  | 83424742  | D230004J03Ri | 4,40563508 | 0,00031837 | 0,00189521  |
| BC065386  | chr6  | 99117521  | 99231978  | Foxp1        | 4,39700143 | 0,00193756 | 0,00482731  |
| NM_007993 | chr2  | 124992036 | 125197826 | Fbn1         | 4,39522392 | 0,00052373 | 0,00237993  |
| BC025125  | chr17 | 72753566  | 72754506  | Ypel5        | 4,38960158 | 0,00375483 | 0,007313    |
| AK006338  | chr16 | 30114817  | 30120044  | 1700025H01R  | 4,38869902 | 0,0010684  | 0,00345204  |
| AK136311  | chr4  | 154054396 | 154056022 | N/A          | 4,38433084 | 0,00268488 | 0,00586521  |
| NM_013675 | chr12 | 77499327  | 77629387  | Spnb1        | 4,37400034 | 0,00036102 | 0,00201118  |
| NM_029436 | chr16 | 20011096  | 20041287  | Klhl24       | 4,37367696 | 0,00542302 | 0,00940706  |
| BC052457  | chr5  | 75856712  | 75938416  | Kit          | 4,37348496 | 0,00532794 | 0,0092935   |
| NM_173769 | chr15 | 98114155  | 98124117  | Zfp641       | 4,37290902 | 0,00240393 | 0,00544332  |
| AK158038  | chr1  | 137422857 | 137504516 | Nav1         | 4,37016172 | 6,21E-07   | 0,00029564  |
| AK042296  | chr3  | 59093753  | 59182817  | Med12l       | 4,37009104 | 0,00197551 | 0,00487994  |
| NM_178658 | chr13 | 24676029  | 24713412  | 6330500D04R  | 4,36941459 | 0,00828208 | 0,01271751  |
| BC058178  | chr13 | 45567418  | 45975929  | N/A          | 4,36867768 | 0,0061084  | 0,001019834 |
| BC099949  | chr8  | 48684768  | 48787028  | Stox2        | 4,36027764 | 0,00013142 | 0,00132801  |
| BC006797  | chrX  | 95338878  | 95351676  | Efnb1        | 4,35915952 | 0,00245059 | 0,00551753  |
| NM_175162 | chr8  | 48684756  | 48851165  | Stox2        | 4,3587466  | 0,0002936  | 0,00183181  |
| BC046601  | chr10 | 36824236  | 36828203  | Marcks       | 4,3580417  | 0,00121218 | 0,0037101   |
| BC049189  | chr13 | 93711890  | 93809306  | Serinc5      | 4,3567027  | 0,00573932 | 0,00975702  |
| BC046307  | chr15 | 101052272 | 101060789 | Grasp        | 4,35448871 | 0,00050119 | 0,00234177  |
| NM_010835 | chr5  | 38108741  | 38112705  | Msx1         | 4,35267811 | 0,01141281 | 0,01638016  |
| NM_013470 | chr5  | 97033716  | 97086270  | Anxa3        | 4,34528258 | 0,00400457 | 0,0076626   |
| BC024054  | chr3  | 59184847  | 59189720  | Gpr171       | 4,34463004 | 0,00072382 | 0,00278414  |
| AK157786  | chr2  | 154709706 | 154718544 | N/A          | 4,34076705 | 0,00993844 | 0,01469203  |
| NM_177683 | chr6  | 114827708 | 114887371 | Vgll4        | 4,3399748  | 0,00032277 | 0,00190758  |
| NM_011995 | chr5  | 14520923  | 14801999  | Pclo         | 4,3330113  | 0,00830602 | 0,01273348  |
| NM_024285 | chr10 | 45024176  | 45058123  | Bves         | 4,33034909 | 0,00544394 | 0,00942848  |
| NM_172290 | chr9  | 28745409  | 29712575  | Hnt          | 4,32547929 | 0,00519446 | 0,00912743  |
| NM_009168 | chr17 | 55563775  | 55569910  | Shd          | 4,31656386 | 4,96E-05   | 0,0009513   |
| BC015459  | chr5  | 144518055 | 144611417 | Baiap2l1     | 4,31514788 | 4,37E-05   | 0,00089714  |
| BC099973  | chr10 | 68608032  | 68685339  | Rhobtb1      | 4,3139915  | 0,00022964 | 0,00164678  |
| BC058749  | chr17 | 5897884   | 5995037   | Synj2        | 4,30878168 | 0,00438206 | 0,00811865  |
| AK031307  | chr2  | 124302041 | 124357398 | Sema6d       | 4,30729858 | 0,00624136 | 0,01036222  |
| BC006912  | chr1  | 137545650 | 137568641 | Csrp1        | 4,30700003 | 0,00021326 | 0,00158335  |
| NM_199449 | chr15 | 57524853  | 57669854  | Zhx2         | 4,30311083 | 7,22E-05   | 0,00106331  |
| BC023307  | chr9  | 28745453  | 29161199  | Hnt          | 4,29227745 | 0,00171576 | 0,00449545  |
| BC059178  | chr15 | 57524995  | 57669908  | Zhx2         | 4,29135524 | 0,00019477 | 0,0015124   |
| NM_033217 | chr11 | 95384907  | 95403788  | Ngfr         | 4,28615295 | 0,00387129 | 0,00747671  |
| NM_010456 | chr6  | 52153636  | 52156953  | Hoxa9        | 4,28509345 | 0,00208272 | 0,00499485  |
| NM_010917 | chr13 | 13229816  | 13304390  | Nid1         | 4,27743718 | 0,00182524 | 0,00465502  |
| NM_028808 | chr3  | 59295834  | 59298811  | P2ry13       | 4,27647864 | 0,00382323 | 0,0074103   |
| XM_901574 | chr16 | 33932714  | 34016837  | Kalrn        | 4,27206422 | 6,25E-06   | 0,00053609  |
| BC061142  | chr6  | 139804063 | 139822009 | Pik3c2g      | 4,27150163 | 0,00213201 | 0,00502753  |
| BC088980  | chr5  | 94342970  | 94351239  | Ccng2        | 4,27089965 | 0,0032576  | 0,00662407  |
| NM_011391 | chr10 | 124630544 | 124731595 | Slc16a7      | 4,2646677  | 0,01299817 | 0,01821271  |
| AK039466  | chr10 | 88496978  | 88687389  | Nmem16d      | 4,26421447 | 0,01226831 | 0,01736966  |
| AK134193  | chr4  | 154054397 | 154056965 | N/A          | 4,26035407 | 0,00377707 | 0,00734232  |
| BC094279  | chr6  | 52098092  | 52099147  | 5730446D14R  | 4,25942888 | 0,00472708 | 0,008561    |
| NM_028450 | chr1  | 44653162  | 44740722  | Gulp1        | 4,25691023 | 9,15E-05   | 0,00112971  |
| NM_172682 | chr3  | 85745992  | 85808435  | 9930021J17Ri | 4,25559247 | 0,00040516 | 0,00210067  |
| AK147524  | chr2  | 153098902 | 153221412 | 8430427H17R  | 4,24931413 | 0,0002759  | 0,00178148  |
| NM_009846 | chr10 | 43267583  | 43272680  | Cd24a        | 4,24774354 | 0,00034584 | 0,00197119  |
| NM_139206 | chr18 | 38098601  | 38123089  | Centd3       | 4,2454476  | 0,00047271 | 0,00229442  |
| NM_021099 | chr5  | 75856720  | 75938419  | Kit          | 4,2453397  | 0,00515323 | 0,00908444  |
| NM_009955 | chr14 | 65756973  | 65822710  | Dpysl2       | 4,24326074 | 0,00063459 | 0,00261829  |
| AK019694  | chr17 | 5964061   | 5989411   | Synj2        | 4,24259412 | 0,00413842 | 0,00780306  |
| NM_019518 | chr15 | 101052242 | 101066427 | Grasp        | 4,24114361 | 0,0008213  | 0,00297684  |
| NM_011594 | chr11 | 118117150 | 118171501 | Timp2        | 4,23479853 | 0,00619306 | 0,01030505  |
| BC043103  | chr1  | 74534709  | 74567304  | Stk36        | 4,23163932 | 0,00472655 | 0,008561    |
| NM_172506 | chr16 | 44404376  | 44478202  | Boc          | 4,23077902 | 0,00196055 | 0,00486224  |
| BC096400  | chr19 | 30996383  | 30996959  | LOC625995    | 4,22954753 | 0,00363606 | 0,00712628  |
| AB014889  | chr2  | 56922902  | 56939306  | Nr4a2        | 4,22740793 | 7,91E-05   | 0,00109922  |
| AK080486  | chr7  | 123285361 | 123291774 | Zfp694       | 4,22729072 | 0,00273307 | 0,00590684  |
| BC037226  | chr11 | 115640175 | 115671843 | Llgl2        | 4,22320028 | 0,00151457 | 0,00418438  |
| BC058198  | chr9  | 85639601  | 85642702  | Tpbq         | 4,2223612  | 0,00027801 | 0,00178414  |
| NM_023868 | chr13 | 11608676  | 12160499  | Ryr2         | 4,22202952 | 0,00199788 | 0,00490922  |
| NM_023638 | chrX  | 7350808   | 7363466   | Porcnc       | 4,21818782 | 0,00687309 | 0,0110893   |
| U70033    | chr17 | 81296849  | 81646703  | Slc8a1       | 4,21539162 | 0,00199281 | 0,00490754  |
| NM_024477 | chr5  | 111464222 | 111527433 | AI428795     | 4,21238315 | 0,00014516 | 0,00136077  |
| BC005613  | chr16 | 24598995  | 24600534  | Lpp          | 4,20892947 | 0,01119521 | 0,01615405  |

|             |       |           |           |              |            |            |            |
|-------------|-------|-----------|-----------|--------------|------------|------------|------------|
| BC023089    | chr2  | 84799423  | 84836326  | P2rx3        | 4,20876415 | 0,00341853 | 0,00681647 |
| AK051661    | chr4  | 32572345  | 32575088  | N/A          | 4,2083752  | 0,00037498 | 0,00204961 |
| NM_007401   | chr8  | 26198529  | 26289914  | Adam5        | 4,19603487 | 0,0082396  | 0,01268056 |
| NM_011627   | chr9  | 85639127  | 85642507  | Tpbp         | 4,19440644 | 0,00079781 | 0,00294539 |
| NM_011393   | chr2  | 102507276 | 102578945 | Slc1a2       | 4,19074479 | 0,00345055 | 0,00685225 |
| BC019465    | chr3  | 98307577  | 98322146  | Reg4         | 4,18772489 | 0,00336741 | 0,00675294 |
| NM_029077   | chr4  | 46527946  | 46566186  | Trim14       | 4,18533567 | 0,00045745 | 0,0022628  |
| AK132014    | chr5  | 111528788 | 111529975 | AI428795     | 4,180146   | 0,00115212 | 0,00360919 |
| NM_198636   | chr10 | 106369191 | 106527778 | 8430416H19R  | 4,17717234 | 0,01081993 | 0,01572993 |
| NM_032399   | chr3  | 59266851  | 59268014  | Gpr87        | 4,1737861  | 0,00477884 | 0,00862343 |
| NM_172588   | chr13 | 93711890  | 93812700  | Serinc5      | 4,16707    | 0,00706852 | 0,01131646 |
| XM_00100422 | chr11 | 105715669 | 105745394 | Tanc2        | 4,16550093 | 0,00254769 | 0,00566739 |
| M84756      | chr8  | 24500666  | 24614335  | Ank1         | 4,1570305  | 0,00063905 | 0,00262577 |
| NM_033327   | chr8  | 90551914  | 90849700  | Zfp423       | 4,15648307 | 0,00206957 | 0,00498135 |
| NM_011803   | chr13 | 5860734   | 5869639   | Klf6         | 4,15442842 | 0,0023421  | 0,00535209 |
| NM_00100436 | chr3  | 134177031 | 134199477 | Cxhc4        | 4,15016875 | 0,00503893 | 0,00294643 |
| BC082788    | chrX  | 136721947 | 136934955 | Col4a5       | 4,1455782  | 0,00365989 | 0,00715888 |
| AK144486    | chr4  | 133833765 | 133976334 | Man1c1       | 4,14091618 | 0,00115783 | 0,00361981 |
| BC079621    | chr17 | 66571894  | 67259018  | Ptpm         | 4,13885967 | 0,0013597  | 0,00396212 |
| BC109176    | chr9  | 35201747  | 35253969  | Cdon         | 4,13774097 | 0,00109295 | 0,00569393 |
| NM_010332   | chr8  | 80559139  | 80620420  | Ednra        | 4,13324056 | 0,00563267 | 0,00965277 |
| BC070420    | chr18 | 33082169  | 33310152  | Camk4        | 4,13064383 | 0,00046866 | 0,00228602 |
| AK147497    | chr8  | 12756990  | 12868705  | Atp11a       | 4,12675179 | 5,83E-05   | 0,00101087 |
| BC094910    | chr10 | 63483154  | 63485099  | Lrrtm3       | 4,12194903 | 0,01011139 | 0,0148997  |
| NM_145907   | chrX  | 7350808   | 7363466   | Porcn        | 4,11416598 | 0,00752525 | 0,01187833 |
| AK144174    | chr19 | 53196126  | 53300518  | Add3         | 4,11157174 | 0,01103392 | 0,01596659 |
| BC026950    | chr2  | 43377362  | 43458765  | Kynu         | 4,10255687 | 0,00551813 | 0,00951666 |
| XM_898204   | chr1  | 172163997 | 172426524 | Nos1ap       | 4,10008362 | 0,00139657 | 0,00401269 |
| AK220486    | chr18 | 38098606  | 38123541  | Centd3       | 4,09534029 | 6,52E-05   | 0,00102744 |
| AK132205    | chr18 | 9879892   | 9882637   | N/A          | 4,09064971 | 0,00674323 | 0,01096593 |
| NM_010137   | chr17 | 86662227  | 86739908  | Epas1        | 4,08965743 | 0,00088501 | 0,00310014 |
| AK002850    | chr15 | 6247046   | 6374980   | Dab2         | 4,08829698 | 7,63E-05   | 0,00108714 |
| XM_884181   | chr7  | 82727783  | 82736034  | LOC619808    | 4,08752249 | 0,00246464 | 0,00553662 |
| NM_011656   | chr3  | 94698162  | 94744210  | Tuft1        | 4,08198251 | 0,0038283  | 0,00741416 |
| BC067018    | chr7  | 137033038 | 137152757 | Ebf3         | 4,07939913 | 0,01365162 | 0,018959   |
| BC008155    | chr17 | 25518107  | 25519984  | BC008155     | 4,07891846 | 0,0047869  | 0,00863003 |
| BC055737    | chr3  | 152758097 | 152919593 | St6galnac5   | 4,07455734 | 0,00147811 | 0,00412948 |
| NM_145628   | chrX  | 19860890  | 19877498  | Usp11        | 4,0721386  | 0,00129251 | 0,00384063 |
| BC049123    | chr15 | 34820088  | 35100269  | Stk3         | 4,06228089 | 0,01119566 | 0,01615405 |
| BC072587    | chr1  | 168221299 | 168246457 | Pogk         | 4,05713132 | 0,00057745 | 0,00248932 |
| NM_021339   | chr9  | 35201746  | 35254013  | Cdon         | 4,05702821 | 0,00107033 | 0,00345308 |
| NM_028341   | chr18 | 12786968  | 12880220  | 2810439F02Ri | 4,05566925 | 0,00024161 | 0,00168872 |
| NM_007635   | chr5  | 94342460  | 94351428  | Ccng2        | 4,05508831 | 0,00288435 | 0,00611322 |
| BC049126    | chr11 | 118117153 | 118171398 | Timp2        | 4,0549103  | 0,00375263 | 0,007313   |
| NM_011712   | chrX  | 131591488 | 131593492 | Wbp5         | 4,05398289 | 1,25E-05   | 0,00059498 |
| NM_021897   | chr4  | 11083587  | 11101524  | Trp53inp1    | 4,0527935  | 0,00017629 | 0,00145985 |
| AF082568    | chr5  | 143515428 | 143521340 | Zfp316       | 4,05247513 | 0,00609627 | 0,01018665 |
| NM_028072   | chr2  | 165765125 | 165846821 | Sulf2        | 4,04983557 | 0,00013449 | 0,0013321  |
| AK054458    | chr7  | 142097456 | 142099808 | N/A          | 4,04723513 | 0,01368284 | 0,01898025 |
| XM_00105208 | chr4  | 53652602  | 53672890  | Fsd1l        | 4,04494476 | 0,00412756 | 0,00779519 |
| BC103603    | chr6  | 34851168  | 34869448  | Stra8        | 4,04043325 | 3,18E-06   | 0,00048602 |
| BC103668    | chr18 | 64465755  | 64512035  | Onecut2      | 4,03719517 | 0,0081837  | 0,01262386 |
| NM_007664   | chr18 | 16732026  | 16952264  | Cdh2         | 4,03348437 | 0,00036478 | 0,00202686 |
| NM_139300   | chr16 | 34704667  | 34920359  | Mylk         | 4,02851092 | 0,00440644 | 0,00814863 |
| NM_177729   | chr3  | 101988014 | 102025931 | N/A          | 4,02835269 | 0,0048595  | 0,00873187 |
| AK051476    | chr9  | 103430641 | 103432964 | N/A          | 4,02637999 | 0,01364036 | 0,01895218 |
| BC020021    | chr18 | 12786951  | 12880126  | 2810439F02Ri | 4,02551491 | 0,00019634 | 0,00151829 |
| NM_026815   | chr7  | 30311851  | 30321494  | Upk1a        | 4,02477091 | 0,00244097 | 0,00550003 |
| XM_913601   | chr17 | 25536704  | 25548865  | Fbxl16       | 4,02429668 | 0,00367609 | 0,00718477 |
| NM_176966   | chr4  | 53652600  | 53672890  | N/A          | 4,02316247 | 0,00123888 | 0,00374691 |
| XM_00100471 | chr9  | 101062457 | 101108095 | 3222402P14Ri | 4,01911168 | 0,00148551 | 0,00413861 |
| AK129448    | chr9  | 13412856  | 13457742  | Maml2        | 4,01652169 | 5,83E-05   | 0,00101087 |
| BC114351    | chr9  | 32445896  | 32504070  | Ets1         | 4,01566801 | 0,00086343 | 0,0030587  |
| NM_175341   | chr14 | 119410850 | 119566877 | Mbnl2        | 4,01488872 | 0,0020593  | 0,00497067 |
| AK152161    | chr18 | 75070240  | 75086627  | Lipg         | 4,01324714 | 0,01366399 | 0,01896734 |
| BC018482    | chr10 | 79391770  | 79398515  | Cnn2         | 4,00889139 | 0,00148006 | 0,00412948 |
| BC026153    | chr4  | 28982037  | 29133177  | Epha7        | 4,00320825 | 0,00266358 | 0,00582901 |
| AK032973    | chr4  | 28982113  | 29042589  | Epha7        | 4,00133106 | 0,0139787  | 0,01930083 |
| XM_00100413 | chr10 | 109087548 | 109404329 | 9630020C08R  | 3,99798576 | 0,00050497 | 0,00234312 |
| NM_028472   | chr9  | 22973477  | 23235604  | Bmper        | 3,99751469 | 0,00172381 | 0,00449732 |
| NM_199365   | chr1  | 168143415 | 168146260 | 5330438I03Ri | 3,993379   | 0,01304352 | 0,01826338 |
| AK047446    | chr18 | 80418346  | 80437205  | Pqlc1        | 3,98974535 | 0,00297604 | 0,00624538 |
| AK172230    | chrX  | 19873929  | 19877245  | Usp11        | 3,98734932 | 0,00085157 | 0,0030347  |
| NM_175031   | chr1  | 74534661  | 74570101  | Stk36        | 3,9865571  | 0,00065604 | 0,00266582 |
| BC008181    | chr10 | 79391810  | 79398521  | Cnn2         | 3,97397648 | 0,0027004  | 0,00587368 |
| BC018381    | chr3  | 159808264 | 159870369 | Gpr177       | 3,97214971 | 4,47E-05   | 0,00090272 |

|             |       |           |           |             |            |            |            |
|-------------|-------|-----------|-----------|-------------|------------|------------|------------|
| AK137314    | chr1  | 82161233  | 82164272  | N/A         | 3,96908557 | 0,0030389  | 0,00631948 |
| NM_019764   | chr9  | 102580683 | 102591563 | Amotl2      | 3,96778357 | 0,00142067 | 0,00404816 |
| AK136860    | chr12 | 71170925  | 71175732  | Trim9       | 3,96374275 | 0,00165056 | 0,004401   |
| NM_977491   | chr12 | 58579164  | 58580923  | BC042761    | 3,96289113 | 0,00323771 | 0,00659713 |
| NM_028113   | chr14 | 59332455  | 59335107  | 2600011E07R | 3,96222278 | 0,00579904 | 0,00981933 |
| NM_011489   | chr11 | 100596820 | 100638618 | Stat5b      | 3,95909312 | 0,00034452 | 0,00196835 |
| BC038036    | chr11 | 113682406 | 113882308 | Sdk2        | 3,95790413 | 0,00195264 | 0,00484665 |
| NM_172544   | chr12 | 89466877  | 90738084  | Nrxn3       | 3,95609389 | 0,00512102 | 0,00905174 |
| XM_897682   | chr1  | 137422857 | 137545438 | LOC623327   | 3,95380942 | 8,10E-06   | 0,0005488  |
| BC098219    | chr3  | 82018577  | 82041501  | Ctso        | 3,94798543 | 0,00347356 | 0,00688933 |
| NM_00103955 | chrX  | 165319148 | 165323022 | G530011O06R | 3,94783037 | 0,00165954 | 0,00441311 |
| NM_007736   | chrX  | 136721786 | 136935548 | Col4a5      | 3,94391921 | 0,00206512 | 0,00497429 |
| BC057205    | chr5  | 103665525 | 103781736 | Ptpn13      | 3,9431994  | 1,16E-05   | 0,00058108 |
| NM_015825   | chr16 | 96305613  | 96329470  | Sh3bgr      | 3,94318118 | 0,00026656 | 0,00175615 |
| NM_145908   | chrX  | 7350808   | 7363466   | Porcn       | 3,94101343 | 0,00624479 | 0,01036222 |
| NM_178745   | chr12 | 79880639  | 79926117  | 6330442E10R | 3,93080102 | 0,00333425 | 0,00671354 |
| AK132455    | chr7  | 135376181 | 135521857 | Ptpre       | 3,9303651  | 0,00062851 | 0,00260219 |
| NM_172703   | chr4  | 137265545 | 137478559 | Eif4g3      | 3,93035602 | 0,00011107 | 0,00122629 |
| AK016672    | chr5  | 14927743  | 14984547  | Speer8-ps1  | 3,93004727 | 0,00663512 | 0,01083681 |
| NM_015739   | chr5  | 24014490  | 24036913  | Gbx1        | 3,92204657 | 0,01183959 | 0,01686682 |
| AK011208    | chr9  | 72722781  | 72743147  | Pygo1       | 3,92166599 | 0,00529933 | 0,00926256 |
| BC047154    | chr6  | 65601214  | 65634624  | A930038C07R | 3,91398981 | 0,01155959 | 0,01653907 |
| NM_033325   | chr14 | 68344555  | 68428775  | Loxl2       | 3,91381799 | 0,00032998 | 0,00193447 |
| AK029440    | chr4  | 137437956 | 137478512 | Eif4g3      | 3,91354672 | 4,25E-05   | 0,0008919  |
| NM_029849   | chr7  | 4637164   | 4639855   | 4632433K11R | 3,91219062 | 0,00403381 | 0,0077008  |
| NM_018803   | chr15 | 89610159  | 89669536  | Syt10       | 3,91090728 | 0,00889847 | 0,01343106 |
| XM_902437   | chr17 | 45984724  | 45987230  | Parc        | 3,90640988 | 8,44E-05   | 0,00112072 |
| AK153771    | chr13 | 28956386  | 28959146  | Sox4        | 3,90387448 | 0,00051003 | 0,00234809 |
| NM_178893   | chr4  | 46558658  | 46587540  | Coro2a      | 3,90342351 | 0,0018476  | 0,00468341 |
| BC057870    | chr17 | 86662467  | 86739645  | Epas1       | 3,89892571 | 0,00210197 | 0,00501057 |
| NM_008772   | chr3  | 61090723  | 61096908  | P2ry1       | 3,89256195 | 0,0045379  | 0,00829144 |
| BC022103    | chr2  | 25881016  | 25944790  | Btdb14a     | 3,88682818 | 0,00013861 | 0,00134116 |
| NM_019831   | chrX  | 97607103  | 97623568  | Zmym3       | 3,88254685 | 0,0001659  | 0,00143051 |
| NM_011305   | chr2  | 27499209  | 27585328  | Rxra        | 3,88078005 | 0,00104074 | 0,00340368 |
| XM_976419   | chr9  | 14292362  | 14365393  | Amotl1      | 3,8788348  | 7,04E-05   | 0,00105565 |
| AK159245    | chr16 | 84837869  | 85057149  | App         | 3,87561877 | 0,00023996 | 0,0016811  |
| NM_199239   | chr2  | 124345075 | 124356750 | Sema6d      | 3,87104568 | 0,00478029 | 0,00862343 |
| BC006955    | chr13 | 56083797  | 56145116  | H2afy       | 3,86794335 | 0,00174514 | 0,00452314 |
| BC089607    | chr18 | 36631999  | 36641748  | Hbegf       | 3,86568299 | 0,00048138 | 0,00231264 |
| NM_884423   | chr8  | 37056314  | 37147966  | Mfhas1      | 3,86378102 | 0,0006738  | 0,00269488 |
| BC005704    | chr6  | 71211856  | 71214895  | AA792894    | 3,86108594 | 0,00094744 | 0,00324634 |
| NM_207237   | chr4  | 133833765 | 133976366 | Man1c1      | 3,86050612 | 0,00112371 | 0,00354848 |
| NM_019737   | chr18 | 20829012  | 20889414  | B4galt6     | 3,85853538 | 0,0010229  | 0,00337061 |
| NM_011340   | chr11 | 75225963  | 75238707  | Serpinf1    | 3,85784006 | 0,00278769 | 0,00598248 |
| NM_007725   | chr10 | 79391762  | 79398518  | Cnn2        | 3,85364409 | 0,00343021 | 0,00683063 |
| AK045099    | chr3  | 27685504  | 27902380  | Fndc3b      | 3,84483051 | 0,00105159 | 0,0034148  |
| NM_00100759 | chr5  | 52662898  | 52663889  | LOC433886   | 3,84243272 | 0,00336442 | 0,00675104 |
| NM_021506   | chr8  | 64116413  | 64286337  | Sh3rf1      | 3,83702102 | 0,00018871 | 0,00149633 |
| NM_178406   | chr4  | 151118161 | 151129137 | Gpr153      | 3,83667528 | 0,00148016 | 0,00412948 |
| NM_183315   | chr8  | 4257659   | 4259210   | Ctxn1       | 3,83518632 | 0,0002023  | 0,00153257 |
| NM_013884   | chr9  | 110090626 | 110107752 | Cspg5       | 3,83517746 | 0,00268587 | 0,00586521 |
| AK220478    | chrX  | 19868783  | 19877496  | Usp11       | 3,83425601 | 0,00020017 | 0,00153001 |
| NM_199240   | chr2  | 124345075 | 124356750 | Sema6d      | 3,83209502 | 0,00632481 | 0,01045426 |
| U81983      | chr17 | 86662509  | 86739734  | Epas1       | 3,83024497 | 0,00508349 | 0,00900729 |
| NM_175501   | chr15 | 11009755  | 11290402  | Adamts12    | 3,82698081 | 0,001358   | 0,00395976 |
| AF404775    | chr19 | 57090390  | 57250641  | Ablim1      | 3,82285373 | 6,62E-05   | 0,00102744 |
| NM_175367   | chr12 | 92044098  | 92191993  | Ston2       | 3,82001067 | 1,26E-05   | 0,00059498 |
| XM_897523   | chr10 | 68608013  | 68668884  | Rhobtb1     | 3,81638486 | 0,00160484 | 0,00432983 |
| NM_010467   | chr2  | 74563818  | 74565982  | Hoxd1       | 3,81470105 | 0,00412025 | 0,00779519 |
| NM_198622   | chr6  | 87946061  | 87947123  | Hifx        | 3,81433089 | 0,00303198 | 0,0063139  |
| NM_019978   | chr16 | 43429639  | 43538402  | Zbtb20      | 3,81233087 | 0,00071113 | 0,00278211 |
| BC085109    | chr17 | 72742612  | 72755437  | Ypel5       | 3,81088657 | 0,00484781 | 0,00871348 |
| NM_175264   | chr14 | 24419987  | 24423845  | 4931406H21R | 3,80887955 | 0,0001262  | 0,00131203 |
| NM_024186   | chr13 | 91935327  | 92175475  | Ssbp2       | 3,80569515 | 0,00509674 | 0,00902487 |
| NM_133918   | chr5  | 31190366  | 31197856  | Emilin1     | 3,80048446 | 0,01233316 | 0,01743866 |
| NM_007447   | chr14 | 50018363  | 50023956  | Ang1        | 3,79960646 | 0,00032316 | 0,00190758 |
| BC029098    | chr4  | 151122885 | 151128675 | Gpr153      | 3,79751764 | 0,00114666 | 0,00359811 |
| BC048572    | chr12 | 84188170  | 84329668  | Dpf3        | 3,79678946 | 0,00017399 | 0,00145326 |
| NM_199238   | chr2  | 124345075 | 124356750 | Sema6d      | 3,79663156 | 0,00894876 | 0,01348989 |
| NM_032000   | chr15 | 50490515  | 50720115  | Trps1       | 3,79520198 | 0,0038613  | 0,00746225 |
| BC011068    | chr8  | 122695198 | 122726499 | Cotl1       | 3,7878521  | 0,00411262 | 0,00779251 |
| NM_011950   | chr17 | 28496945  | 28506293  | Mapk13      | 3,78702952 | 0,0070438  | 0,01128942 |
| XM_356600   | chr12 | 113126653 | 113130555 | LOC382639   | 3,78604091 | 0,0013729  | 0,00397534 |
| U92702      | chr7  | 137033583 | 137152329 | Ebf3        | 3,7838459  | 0,00571661 | 0,00973784 |
| AK154082    | chr19 | 57086521  | 57088330  | Ablim1      | 3,78291056 | 1,48E-05   | 0,00061341 |
| NM_007791   | chr1  | 137545607 | 137568640 | Csrp1       | 3,78282316 | 1,33E-05   | 0,00060231 |



|             |       |           |           |              |            |            |            |
|-------------|-------|-----------|-----------|--------------|------------|------------|------------|
| BC049721    | chr1  | 74534735  | 74538731  | Stk36        | 3,77587237 | 6,89E-06   | 0,00053713 |
| NM_008546   | chr4  | 140282778 | 140288049 | Mfap2        | 3,77403203 | 0,0006126  | 0,00256173 |
| XM_355338   | chr2  | 74506386  | 74508772  | Hoxd8        | 3,77122528 | 0,0058588  | 0,00990259 |
| NM_172537   | chr2  | 124301736 | 124359211 | Sema6d       | 3,76642726 | 0,00166624 | 0,00441792 |
| AK076154    | chr10 | 70320401  | 70554990  | Bicc1        | 3,76177441 | 0,00081728 | 0,00297684 |
| BC061219    | chr8  | 24604614  | 24614498  | Ank1         | 3,75856859 | 0,00104529 | 0,00340917 |
| NM_172271   | chr3  | 107595603 | 107646074 | Slc6a17      | 3,75648498 | 0,00348823 | 0,00691384 |
| AK133720    | chr17 | 67750054  | 67855885  | Arhgap28     | 3,75441119 | 0,01010941 | 0,01489945 |
| BC056446    | chr16 | 42827004  | 43538442  | Zbtb20       | 3,75350915 | 0,00071561 | 0,00278211 |
| NM_026505   | chr18 | 3507954   | 3516402   | Bambi        | 3,75205246 | 0,00059359 | 0,00252703 |
| NM_177190   | chr2  | 104480818 | 104513001 | Tcp11l1      | 3,74882029 | 0,00014153 | 0,00134405 |
| NM_00103348 | chr15 | 67003305  | 67006369  | 5330418N22R  | 3,74599766 | 0,00122675 | 0,00373731 |
| NM_053143   | chr18 | 37615438  | 37620477  | Pcdhb18      | 3,73757708 | 0,00421197 | 0,00788845 |
| AK078654    | chr9  | 101062459 | 101068100 | 3222402P14Ri | 3,73552237 | 0,000663   | 0,00267725 |
| AK135051    | chr3  | 103705202 | 103774628 | N/A          | 3,73220095 | 0,00285821 | 0,00607293 |
| XM_973193   | chrX  | 108745047 | 108750500 | LOC664878    | 3,73080425 | 0,00183573 | 0,00467306 |
| AK169188    | chr9  | 66827033  | 66848357  | Tpm1         | 3,72921851 | 0,00169511 | 0,00446925 |
| NM_009755   | chr14 | 69209637  | 69255268  | Bmp1         | 3,72918405 | 0,00053309 | 0,00239637 |
| AK162457    | chr9  | 116791820 | 117100273 | Rbms3        | 3,72556698 | 0,00101137 | 0,00336247 |
| DQ133463    | chr17 | 25522466  | 25524568  | Metrn        | 3,72544647 | 0,00082254 | 0,00373731 |
| NM_009223   | chr16 | 10979938  | 10988556  | Snn          | 3,72511079 | 1,44E-05   | 0,00060233 |
| AK132106    | chr14 | 24498216  | 24499925  | N/A          | 3,71828323 | 8,58E-05   | 0,00112072 |
| NM_008237   | chr4  | 151129771 | 151135462 | Hes3         | 3,71235154 | 0,00309469 | 0,0063876  |
| BC060633    | chr13 | 59459516  | 59566889  | Agtpbp1      | 3,70667768 | 0,00502112 | 0,00893076 |
| BC029668    | chr4  | 11631617  | 11641895  | Gem          | 3,70342469 | 0,00161532 | 0,00434735 |
| NM_178682   | chr12 | 81709406  | 81799681  | 4933426M11R  | 3,70336479 | 0,0055959  | 0,00960909 |
| XM_00100085 | chr3  | 93527733  | 93534481  | Tchh         | 3,7013973  | 0,01296523 | 0,01817938 |
| AK143663    | chr11 | 61772957  | 61935646  | Specc1       | 3,69614153 | 0,00256554 | 0,00568828 |
| NM_172694   | chr4  | 69918287  | 70021289  | Megf9        | 3,69517665 | 0,00072283 | 0,00278211 |
| XM_133692   | chr7  | 100743832 | 100806248 | Arhgef17     | 3,68777337 | 0,00128898 | 0,00383731 |
| NM_010417   | chrX  | 92658179  | 92777204  | Heph         | 3,68537136 | 0,00928028 | 0,01390082 |
| NM_00101266 | chr8  | 23928158  | 23942400  | AI316807     | 3,67725698 | 0,00022144 | 0,00161725 |
| AK083807    | chr3  | 107597213 | 107645973 | Slc6a17      | 3,67703608 | 0,0004991  | 0,00234177 |
| NM_010517   | chr11 | 98857349  | 98868736  | Igfbp4       | 3,6719761  | 0,00801425 | 0,01244944 |
| NM_008469   | chr11 | 99948106  | 99951948  | Krt1-15      | 3,67097511 | 0,00897402 | 0,01352114 |
| BC060232    | chr16 | 76173416  | 76235205  | Nrip1        | 3,66734672 | 0,00075076 | 0,00284013 |
| NM_178688   | chr19 | 57090389  | 57269282  | Ablim1       | 3,66359493 | 0,00016917 | 0,00143675 |
| AK171860    | chr19 | 57090500  | 57368169  | Ablim1       | 3,66318019 | 0,00053609 | 0,00240124 |
| AJ243657    | chrX  | 96178337  | 96603478  | Eda          | 3,65600151 | 0,0027523  | 0,00593247 |
| AK083006    | chr10 | 27764272  | 28250824  | Ptprk        | 3,64530619 | 0,01215334 | 0,01722735 |
| AK034238    | chr6  | 99064717  | 99068407  | N/A          | 3,64240161 | 0,00330503 | 0,00667726 |
| NM_00102993 | chr11 | 61893291  | 62039208  | Specc1       | 3,64021417 | 0,00445018 | 0,00820092 |
| BC029005    | chr12 | 77304604  | 77314970  | Zbtb1        | 3,63957502 | 0,01286664 | 0,0180794  |
| AF004435    | chrX  | 96178376  | 96600258  | Eda          | 3,63867534 | 0,0002625  | 0,0017471  |
| AK016526    | chr9  | 14297901  | 14393922  | Trps1        | 3,63849039 | 5,98E-05   | 0,00102208 |
| BC010206    | chr13 | 45400857  | 45422918  | Mylip        | 3,62932185 | 0,0077661  | 0,0121654  |
| NM_007408   | chr4  | 86127796  | 86141225  | Adfp         | 3,62130578 | 0,00017109 | 0,00144484 |
| NM_177863   | chr4  | 82369157  | 82492333  | Frem1        | 3,62064484 | 0,00817564 | 0,0126147  |
| XM_898215   | chr1  | 172163888 | 172393785 | Nos1ap       | 3,61864605 | 0,00620817 | 0,01032157 |
| NM_027464   | chr14 | 39902452  | 39922488  | 5730469M10R  | 3,61512784 | 0,00050082 | 0,00234177 |
| NM_172856   | chr2  | 68662395  | 68912129  | Lass6        | 3,61510279 | 0,00024436 | 0,00169402 |
| NM_172647   | chr1  | 173274235 | 173301268 | F11r         | 3,61428432 | 0,0051996  | 0,00912871 |
| NM_172668   | chr2  | 91258539  | 91314618  | Lrp4         | 3,61342429 | 0,0017182  | 0,00449545 |
| NM_010276   | chr4  | 11631603  | 11641899  | Gem          | 3,61277314 | 0,0017735  | 0,0045694  |
| NM_175170   | chr1  | 168234261 | 168246481 | Pogk         | 3,61011134 | 0,00614958 | 0,01024241 |
| NM_172685   | chr3  | 109251204 | 109296465 | Slc25a24     | 3,61002793 | 8,93E-05   | 0,00112072 |
| BC037058    | chr15 | 50490524  | 50719120  | Trps1        | 3,60865194 | 0,00495645 | 0,0088462  |
| AK031672    | chr11 | 109391221 | 109427487 | Wipi1        | 3,60587654 | 0,00262742 | 0,00578046 |
| AK136603    | chr12 | 112313822 | 112355848 | Ppp1r13b     | 3,6056516  | 8,52E-06   | 0,00054898 |
| XM_146893   | chr9  | 51864349  | 51920476  | Zc3h12c      | 3,60106423 | 0,0129389  | 0,01815099 |
| D28818      | chr18 | 33921761  | 34130935  | Epb4.1l4a    | 3,60029054 | 0,00090249 | 0,00314253 |
| BC050925    | chr10 | 79330267  | 79357832  | Arid3a       | 3,59805357 | 6,14E-06   | 0,00053609 |
| AK082289    | chr10 | 70318137  | 70319105  | 4930533K18R  | 3,59689821 | 0,00772658 | 0,01212898 |
| NM_173777   | chr9  | 20418101  | 20478631  | Olfm2        | 3,59629159 | 0,00050254 | 0,00234312 |
| BC021407    | chr16 | 20020481  | 20036960  | Klhl24       | 3,59590939 | 0,00444487 | 0,00489681 |
| AK053913    | chr5  | 48271402  | 48471405  | Slit2        | 3,59416506 | 0,00053178 | 0,00239637 |
| AK029361    | chr3  | 5195910   | 5198289   | N/A          | 3,58918595 | 0,01145992 | 0,01643195 |
| NM_173427   | chr4  | 139237434 | 139239669 | Klhdc7a      | 3,58837334 | 0,00152741 | 0,00420209 |
| NM_011074   | chr5  | 4809738   | 5386203   | Pftk1        | 3,58825727 | 0,00928431 | 0,01390082 |
| NM_172430   | chr1  | 83134465  | 83287190  | 4930544G21R  | 3,58695588 | 0,00630693 | 0,01043339 |
| AY147407    | chr8  | 90551916  | 90785840  | Zfp423       | 3,58355128 | 0,00017428 | 0,00145326 |
| NM_029432   | chr2  | 130399271 | 130531551 | 4930402H24R  | 3,58086964 | 0,00026286 | 0,0017471  |
| BC051676    | chr15 | 94371846  | 94396079  | Irak4        | 3,58067108 | 0,00203404 | 0,0049518  |
| NM_028127   | chr12 | 71744118  | 71820839  | Frmf6        | 3,58034845 | 0,00132885 | 0,00390779 |
| BC010588    | chr9  | 32445611  | 32504607  | Ets1         | 3,57785933 | 0,0007155  | 0,00278211 |
| AB062122    | chr2  | 11168397  | 11218549  | Prkcq        | 3,57689227 | 0,003106   | 0,00639874 |

|             |       |           |           |              |            |            |             |
|-------------|-------|-----------|-----------|--------------|------------|------------|-------------|
| XM_886379   | chr13 | 41638353  | 41646028  | LOC621976    | 3,57572718 | 0,00050995 | 0,00234809  |
| NM_021560   | chr3  | 18246552  | 18249657  | Bhlhb5       | 3,57500023 | 0,00444303 | 0,00819597  |
| NM_007937   | chr5  | 85132351  | 85491482  | Epha5        | 3,57422387 | 0,01350762 | 0,0188028   |
| BC032216    | chr19 | 57088172  | 57121488  | Ablim1       | 3,57376144 | 8,41E-05   | 0,00112072  |
| NM_00103325 | chr10 | 12903592  | 13014358  | Phactr2      | 3,57296884 | 0,00141768 | 0,00404595  |
| AF461092    | chr9  | 110088958 | 110107751 | Cspg5        | 3,57142543 | 0,00048039 | 0,00230991  |
| NM_145568   | chr6  | 71201595  | 71214896  | AA792894     | 3,56492074 | 0,0008528  | 0,00303547  |
| BC024319    | chr11 | 100596822 | 100666631 | Stat5b       | 3,56396541 | 0,00130841 | 0,00387134  |
| NM_194268   | chr18 | 64465732  | 64512126  | Onecut2      | 3,55772089 | 0,00448246 | 0,00823557  |
| NM_011199   | chr9  | 110567069 | 110587116 | Pthr1        | 3,55652918 | 0,00040096 | 0,00208781  |
| AK147921    | chr13 | 13149767  | 13185721  | Gpr137b      | 3,55266913 | 0,00183019 | 0,00466306  |
| NM_031999   | chr13 | 13150739  | 13185713  | Gpr137b      | 3,55202893 | 0,00031067 | 0,00186879  |
| NM_175381   | chr19 | 7487592   | 7492948   | 2700081O15R  | 3,55148732 | 0,00101172 | 0,00336247  |
| BC075716    | chr5  | 75856710  | 75937128  | Kit          | 3,54194874 | 0,00301134 | 0,00629111  |
| NM_009776   | chr2  | 84566223  | 84576243  | Serping1     | 3,54159686 | 0,00334063 | 0,00672184  |
| AK165552    | chr5  | 129299274 | 129323207 | Erim         | 3,54009972 | 0,00224831 | 0,001821369 |
| NM_028071   | chr8  | 122695201 | 122726517 | Cotl1        | 3,52917263 | 0,0039418  | 0,00758218  |
| NM_00102524 | chr18 | 82609550  | 82693131  | Mbp          | 3,52874048 | 0,00197131 | 0,00487783  |
| NM_00103387 | chr15 | 72339374  | 72373535  | Kcnk9        | 3,52763183 | 0,00165748 | 0,0044096   |
| NM_177068   | chr1  | 172481509 | 172519464 | Olflml2b     | 3,52429983 | 0,00055237 | 0,00242481  |
| NM_153789   | chr13 | 45400713  | 45422912  | Mylip        | 3,52265536 | 0,0077456  | 0,01214285  |
| BC013492    | chr16 | 38661627  | 38688180  | B4galt4      | 3,52123131 | 0,0010153  | 0,00336477  |
| NM_011104   | chr17 | 86076915  | 86563024  | Prkc         | 3,51914104 | 0,0053266  | 0,0092935   |
| NM_009793   | chr18 | 33082365  | 33311737  | Camk4        | 3,516077   | 0,00108032 | 0,0034699   |
| NM_007498   | chr1  | 192870910 | 192883948 | Atf3         | 3,51286143 | 0,00679581 | 0,01100838  |
| AK046543    | chr6  | 83364096  | 83407336  | B430006D22R  | 3,50763833 | 0,00903841 | 0,01358724  |
| BC002262    | chr5  | 111528511 | 111529172 | AI428795     | 3,50682799 | 0,00029032 | 0,00182576  |
| BC057936    | chr18 | 9707656   | 9877990   | Colec12      | 3,50400945 | 0,00494968 | 0,00884327  |
| AK043121    | chr10 | 122081821 | 122283393 | Ppm1h        | 3,50163004 | 0,00633748 | 0,01046941  |
| BC055369    | chr3  | 109251226 | 109296509 | Slc25a24     | 3,50093433 | 0,00068753 | 0,00272906  |
| AK160120    | chrX  | 165029303 | 165334900 | Mid1         | 3,50047329 | 0,00239071 | 0,00542895  |
| NM_007471   | chr16 | 84837872  | 85057149  | App          | 3,49348432 | 6,19E-05   | 0,00102496  |
| AK159584    | chr17 | 36654080  | 36657520  | Gabbr1       | 3,48729078 | 0,00748307 | 0,01181829  |
| NM_010687   | chr8  | 75710670  | 76248628  | Large        | 3,48641264 | 2,20E-05   | 0,00070228  |
| NM_00103864 | chr9  | 32445606  | 32507385  | Ets1         | 3,48588103 | 0,00026871 | 0,00175615  |
| NM_028608   | chr10 | 111389566 | 111401305 | Glipr1       | 3,4788167  | 0,01245692 | 0,01759075  |
| AK156584    | chr10 | 39059213  | 39254788  | Fyn          | 3,47605281 | 0,00207671 | 0,00498443  |
| NM_175481   | chr9  | 42271428  | 42695366  | Grik4        | 3,47217581 | 0,00024966 | 0,00170185  |
| BC085291    | chr13 | 73095294  | 73100584  | Irx2         | 3,47106087 | 0,00637399 | 0,01051514  |
| NM_011057   | chr15 | 79823128  | 79842063  | Pdgfb        | 3,46924084 | 0,00648638 | 0,01065045  |
| AK046639    | chr4  | 137265567 | 137388320 | Eif4g3       | 3,4631463  | 0,00024159 | 0,00168872  |
| XM_980571   | chrX  | 49300818  | 49302041  | C430049B03R  | 3,46289026 | 0,00728705 | 0,0115731   |
| NM_007704   | chr4  | 98038651  | 98211621  | Inadl        | 3,46135441 | 3,48E-05   | 0,00083399  |
| NM_178111   | chr2  | 155073296 | 155081288 | Trp53inp2    | 3,46088259 | 0,00135166 | 0,00395097  |
| AK158261    | chr13 | 15254609  | 15454405  | Gli3         | 3,46034688 | 0,00140048 | 0,00402005  |
| XM_988334   | chr2  | 59899066  | 59899927  | LOC667103    | 3,45823682 | 0,00406684 | 0,00773412  |
| NM_053147   | chr18 | 37644326  | 37647393  | Pcdhb22      | 3,45376519 | 0,00789476 | 0,01232806  |
| AK129100    | chr12 | 81709616  | 81799680  | 4933426M11R  | 3,45205791 | 0,00936962 | 0,01400393  |
| NM_010942   | chr5  | 38425441  | 38447716  | Nsg1         | 3,45093349 | 0,00571857 | 0,00973839  |
| BC027746    | chr17 | 49975095  | 50153646  | Plcl2        | 3,4461289  | 9,33E-05   | 0,00113949  |
| NM_028643   | chr14 | 56870389  | 56953372  | Epha1        | 3,44601743 | 0,00014417 | 0,00135792  |
| NM_145438   | chr11 | 115640197 | 115671870 | Llgl2        | 3,44238072 | 0,00036128 | 0,00201118  |
| AK032942    | chr9  | 66828164  | 66848406  | Tpm1         | 3,44141052 | 0,00038925 | 0,00206033  |
| AK132217    | chr18 | 34343635  | 34346869  | N/A          | 3,43993984 | 0,00841355 | 0,01285965  |
| XM_979253   | chr1  | 23314323  | 23314725  | LOC665758    | 3,4392246  | 0,0011447  | 0,00359522  |
| NM_008130   | chr13 | 15254866  | 15517860  | Gli3         | 3,43688124 | 0,00058279 | 0,00250706  |
| BC064799    | chr1  | 192870913 | 192883814 | Atf3         | 3,43644452 | 0,00773228 | 0,01213366  |
| NM_010434   | chr2  | 104230602 | 104295083 | Hipk3        | 3,4359761  | 6,55E-05   | 0,00102744  |
| BC003835    | chr3  | 69662087  | 69667273  | B3galt3      | 3,43465851 | 0,00561592 | 0,00963236  |
| NM_019804   | chr16 | 38661613  | 38688176  | B4galt4      | 3,42555243 | 0,00067676 | 0,00270071  |
| NM_139146   | chr1  | 56740811  | 56915879  | Satb2        | 3,42144716 | 0,00164672 | 0,00439852  |
| NM_011356   | chr2  | 80212808  | 80248235  | Frzb         | 3,420309   | 0,00065961 | 0,00266798  |
| NM_025944   | chr4  | 49605676  | 49618903  | 2810432L12Ri | 3,41989019 | 0,00773595 | 0,0121341   |
| NM_133753   | chr4  | 149698890 | 149712680 | Errfi1       | 3,41931342 | 0,0023962  | 0,00543406  |
| NM_011264   | chr10 | 39421575  | 39564622  | Rev3l        | 3,41897372 | 0,00014157 | 0,00134405  |
| AK034255    | chr12 | 90726970  | 90738489  | Nrxn3        | 3,41811278 | 0,01099207 | 0,01594131  |
| AF208292    | chr6  | 38627516  | 38766831  | Hipk2        | 3,41647049 | 0,00364246 | 0,00713181  |
| NM_153177   | chr4  | 125994455 | 126035544 | Eif2c4       | 3,41068141 | 0,00060286 | 0,00253756  |
| NM_010879   | chr1  | 43390296  | 43515060  | Nck2         | 3,40810551 | 0,00157752 | 0,00428382  |
| NM_011570   | chr6  | 17015223  | 17055825  | Tes          | 3,40714497 | 8,65E-05   | 0,00112072  |
| NM_00100198 | chr2  | 153098906 | 153175224 | 8430427H17R  | 3,40597222 | 6,29E-06   | 0,00053609  |
| NM_133721   | chr9  | 118455406 | 118747637 | Itga9        | 3,4058227  | 0,00116236 | 0,00362287  |
| AK044972    | chr15 | 4325644   | 4525577   | Plcxd3       | 3,40579909 | 0,00266763 | 0,00583434  |
| AK133639    | chr16 | 84838073  | 85057150  | App          | 3,405445   | 0,00014186 | 0,00134467  |
| XM_194371   | chr7  | 105626809 | 105661745 | Dchs1        | 3,40380094 | 0,00126684 | 0,00380307  |
| NM_010753   | chr5  | 34493436  | 34504567  | Mxd4         | 3,40128524 | 4,38E-07   | 0,00029564  |

|             |       |           |           |              |            |            |            |
|-------------|-------|-----------|-----------|--------------|------------|------------|------------|
| BC057588    | chr5  | 13405667  | 13606990  | Sema3a       | 3,39920334 | 0,00551757 | 0,00951666 |
| NM_00101233 | chr2  | 91730659  | 91732632  | Mdk          | 3,39633006 | 9,20E-05   | 0,00113271 |
| BC046798    | chr6  | 71201296  | 71214895  | AA792894     | 3,39440804 | 0,0006636  | 0,00267725 |
| AK030564    | chr14 | 47042773  | 47180324  | Peli2        | 3,39204035 | 0,00204202 | 0,00495706 |
| AK044551    | chr3  | 103705202 | 103756617 | Syt6         | 3,3900816  | 0,00144117 | 0,00406944 |
| AK086282    | chr14 | 115817840 | 115820570 | N/A          | 3,38899302 | 0,00494638 | 0,00884002 |
| XM_134498   | chr8  | 88526692  | 88591027  | Neto2        | 3,38828838 | 0,0102814  | 0,0151054  |
| BC075668    | chr14 | 64922763  | 64935657  | Clu          | 3,38676997 | 0,00256551 | 0,00568828 |
| NM_018774   | chr4  | 128207299 | 128255178 | Phc2         | 3,37785328 | 0,00264413 | 0,00580638 |
| NM_013758   | chr19 | 53256725  | 53300399  | Add3         | 3,37722898 | 0,00130531 | 0,00386602 |
| AK085509    | chr7  | 87122555  | 87271624  | Nox4         | 3,37477971 | 0,00075329 | 0,00284787 |
| BC024354    | chr10 | 60484754  | 60489679  | Pcbd1        | 3,3690457  | 4,98E-05   | 0,0009513  |
| NM_00100417 | chr3  | 51777349  | 51944213  | Maml3        | 3,36710801 | 0,00194781 | 0,0048407  |
| NM_007705   | chr10 | 79570969  | 79574782  | Cirbp        | 3,3661668  | 0,00270369 | 0,00587575 |
| BC054442    | chrX  | 92658314  | 92777201  | Heph         | 3,36500038 | 0,0121181  | 0,01718148 |
| NM_030598   | chr17 | 43416245  | 43502571  | Dscr111      | 3,36048625 | 0,00747035 | 0,01180446 |
| NM_015734   | chr2  | 27708693  | 27859533  | Col5a1       | 3,36027662 | 0,0007002  | 0,00277013 |
| AF317423    | chr18 | 5046584   | 5118162   | Svil         | 3,35715698 | 0,00587528 | 0,00991301 |
| NM_011614   | chr11 | 69502542  | 69511949  | Trnfsf12     | 3,35306395 | 0,00017272 | 0,00145326 |
| AK172895    | chr4  | 46526178  | 46557367  | Trm14        | 3,35210344 | 0,00037563 | 0,00204961 |
| AY212512    | chr2  | 165355992 | 165462320 | Eya2         | 3,35167749 | 0,00130906 | 0,00387135 |
| NM_00103864 | chr7  | 74148930  | 74428293  | Slco3a1      | 3,34752153 | 2,72E-05   | 0,00080751 |
| NM_00103922 | chr5  | 44388689  | 44390763  | LOC624120    | 3,3468487  | 0,00300932 | 0,00629111 |
| BC049363    | chr3  | 94498721  | 94516895  | Tdrkh        | 3,34359475 | 0,00276094 | 0,00594035 |
| AK136160    | chrX  | 165334064 | 165334825 | Mid1         | 3,34275279 | 0,00197641 | 0,00487994 |
| BC051094    | chr18 | 82609619  | 82689733  | Mbp          | 3,34266784 | 0,00246755 | 0,00554106 |
| NM_178252   | chr7  | 30230985  | 30243769  | Snx26        | 3,34211953 | 0,00012192 | 0,00128279 |
| NM_010516   | chr3  | 145584361 | 145587367 | Cyr61        | 3,33177275 | 0,00108036 | 0,00334699 |
| NM_145356   | chr18 | 75945542  | 76273929  | Zbtb7c       | 3,33134938 | 0,00893702 | 0,013479   |
| NM_028651   | chr14 | 122054154 | 122118441 | Tmtc4        | 3,32697264 | 0,00141157 | 0,00403794 |
| BC059063    | chr19 | 7488071   | 7492583   | 2700081O15R  | 3,32569685 | 0,00136381 | 0,00396442 |
| BC103669    | chr2  | 171939703 | 171941264 | Mc3r         | 3,32159613 | 0,00098926 | 0,00332851 |
| AK122445    | chr5  | 64438585  | 64630615  | Tbc1d1       | 3,32114336 | 8,88E-05   | 0,00112072 |
| NM_00102985 | chr3  | 88621974  | 88627307  | 2700083E18R  | 3,31875777 | 3,41E-05   | 0,00083399 |
| BC053708    | chr2  | 18595157  | 18603698  | Bmi1         | 3,30434273 | 0,00208193 | 0,00499485 |
| NM_020606   | chr7  | 112218886 | 112382869 | Parva        | 3,30235069 | 0,00269297 | 0,00586647 |
| XM_900835   | chr8  | 33303153  | 33475424  | Nrg1         | 3,30053524 | 0,01035816 | 0,01518334 |
| NM_010433   | chr6  | 38627512  | 38805560  | Hipk2        | 3,29909426 | 0,00342649 | 0,00682778 |
| NM_010099   | chrX  | 96178324  | 96603479  | Eda          | 3,29862932 | 0,00077955 | 0,00291208 |
| BC067398    | chr10 | 119222448 | 119480215 | Grip1        | 3,29690732 | 0,00224144 | 0,00520178 |
| NM_016769   | chr9  | 63444772  | 63556000  | Smad3        | 3,29474467 | 0,00203941 | 0,00495532 |
| BC015254    | chr1  | 92035235  | 92046891  | Cmkor1       | 3,28927584 | 0,00093487 | 0,00321436 |
| NM_009366   | chr14 | 75238719  | 75241916  | Tsc22d1      | 3,28352021 | 0,00063674 | 0,00261872 |
| XM_900821   | chr8  | 33303153  | 33415959  | Nrg1         | 3,28257203 | 0,00798207 | 0,0124124  |
| BC049812    | chr3  | 51775543  | 51778553  | Maml3        | 3,27992615 | 0,0017967  | 0,0046053  |
| BC058698    | chr1  | 74534845  | 74569249  | Stk36        | 3,27878204 | 0,000709   | 0,00278205 |
| NM_011050   | chr19 | 53956778  | 53983162  | Pdcd4        | 3,2771234  | 0,00026729 | 0,00175615 |
| XM_484061   | chr11 | 88107909  | 88111456  | 1700106J16Ri | 3,27472403 | 0,00295956 | 0,00622721 |
| NM_145533   | chr2  | 131183383 | 131216613 | Smox         | 3,27147973 | 0,0008218  | 0,00297684 |
| XM_887255   | chr1  | 167139299 | 167161079 | Gpr161       | 3,27085242 | 0,00082968 | 0,00299247 |
| NM_172051   | chr10 | 93944677  | 94020753  | Tmcc3        | 3,26925822 | 0,00679077 | 0,01100838 |
| NM_024239   | chr6  | 83508863  | 83538093  | Stampb       | 3,2688277  | 0,00173917 | 0,00451805 |
| NM_011383   | chr7  | 18253065  | 18256867  | Six5         | 3,26400515 | 0,0022057  | 0,00516106 |
| NM_138313   | chr2  | 118220197 | 118241119 | Bmf          | 3,26358286 | 0,00119738 | 0,00368768 |
| NM_008427   | chr15 | 79310971  | 79336740  | Kcnj4        | 3,26131396 | 0,00031712 | 0,00189444 |
| AK220281    | chr2  | 71782053  | 72058308  | Pdgif4       | 3,25899393 | 0,01130972 | 0,01627346 |
| NM_053145   | chr18 | 37630262  | 37636634  | Pcdhb20      | 3,25702923 | 0,01131525 | 0,01627346 |
| NM_008862   | chr3  | 7349742   | 7428439   | Pkia         | 3,25638211 | 0,00657499 | 0,01075919 |
| BC027301    | chr8  | 24253711  | 24271145  | Ap3m2        | 3,25453178 | 0,00428201 | 0,00798041 |
| BC031368    | chr14 | 122054152 | 122098565 | Tmtc4        | 3,25189348 | 0,00318776 | 0,00651988 |
| NM_025932   | chrX  | 158200956 | 158232536 | Syp1         | 3,25134504 | 0,00098158 | 0,00332132 |
| XM_975984   | chr9  | 13284661  | 13285330  | LOC665307    | 3,24741853 | 0,00367232 | 0,00718084 |
| BC049737    | chr16 | 16983791  | 16998422  | Ypel1        | 3,24399891 | 0,0096887  | 0,01439781 |
| BC037440    | chr15 | 34820269  | 35100339  | Stk3         | 3,24398392 | 0,00050071 | 0,00234177 |
| BC059864    | chr4  | 22022646  | 22087633  | 6230409E13R  | 3,24354173 | 0,01072516 | 0,01562644 |
| AK042369    | chr10 | 30335782  | 30345253  | Ncoa7        | 3,23937765 | 0,00716444 | 0,01141486 |
| NM_175185   | chr8  | 122447965 | 122461160 | Hsd1l        | 3,23621323 | 0,00189409 | 0,00475321 |
| AK158124    | chrX  | 98253569  | 98274685  | N/A          | 3,23578705 | 0,01342754 | 0,01871318 |
| BC051142    | chr17 | 34006554  | 34068787  | BC051142     | 3,23418006 | 0,00640935 | 0,01055798 |
| NM_00103355 | chr5  | 105656076 | 105726491 | Lrrc8b       | 3,2253074  | 5,20E-05   | 0,00096639 |
| NM_013492   | chr14 | 64922734  | 64935658  | Clu          | 3,22288639 | 0,00258766 | 0,00572454 |
| AK153809    | chr11 | 77331315  | 77336810  | 1300007F04Ri | 3,22072764 | 0,00529219 | 0,00925552 |
| NM_009543   | chr6  | 71423402  | 71440390  | Rnf103       | 3,21961162 | 0,00043962 | 0,00221264 |
| NM_178874   | chr1  | 134183860 | 134218827 | Tmcc2        | 3,21928432 | 0,00145021 | 0,00408222 |
| XM_134943   | chr9  | 57049279  | 57060749  | 1700017B05R  | 3,21907606 | 0,00018891 | 0,00149633 |
| NM_013788   | chr7  | 62340820  | 62343460  | Peg12        | 3,21868933 | 0,00495196 | 0,00884469 |

|             |       |           |           |             |            |            |            |
|-------------|-------|-----------|-----------|-------------|------------|------------|------------|
| NM_013926   | chr11 | 118854525 | 118857003 | Cbx8        | 3,2174625  | 0,00499539 | 0,00889827 |
| NM_00102413 | chr9  | 30648719  | 30672017  | Adamts15    | 3,21700906 | 0,01345178 | 0,01874259 |
| AK054453    | chr2  | 20640131  | 20721184  | BC026657    | 3,21337644 | 0,00042026 | 0,00215045 |
| NM_009174   | chr3  | 58762877  | 58780317  | Siah2       | 3,20756833 | 0,00054758 | 0,00241621 |
| BC021373    | chrX  | 158200956 | 158232486 | Syap1       | 3,20591609 | 6,08E-05   | 0,00102407 |
| NM_019791   | chrX  | 90788192  | 90794793  | Maged1      | 3,20521989 | 2,07E-05   | 0,00069309 |
| NM_019688   | chr2  | 71782125  | 72057215  | Rapgef4     | 3,20465711 | 0,00111525 | 0,00353676 |
| NM_145410   | chr17 | 25518105  | 25519884  | BC008155    | 3,20383533 | 0,00124385 | 0,00375292 |
| NM_207203   | chr8  | 4209542   | 4217312   | BC068157    | 3,20278436 | 0,00022446 | 0,00162319 |
| NM_007941   | chr5  | 129299274 | 129323282 | Epim        | 3,20236259 | 0,00211923 | 0,00501981 |
| BC004688    | chr11 | 76074152  | 76215296  | Nxn         | 3,20005492 | 0,000539   | 0,00240299 |
| NM_173440   | chr16 | 76173541  | 76255729  | Nrip1       | 3,19862087 | 0,00076721 | 0,00288586 |
| NM_020026   | chr3  | 69662114  | 69686790  | B3galt3     | 3,19734259 | 0,00381994 | 0,00740634 |
| AY356533    | chr14 | 26479710  | 27144414  | D14Ert171e  | 3,19554056 | 0,00603914 | 0,01011872 |
| AK132695    | chr13 | 59503030  | 59566909  | Agtpbp1     | 3,19271402 | 0,00515642 | 0,00908469 |
| BC030329    | chr14 | 120370282 | 120418922 | Farp2       | 3,19244109 | 0,00087101 | 0,00375789 |
| AK128965    | chr13 | 13150739  | 13185750  | Gpr137b     | 3,19230833 | 0,00688617 | 0,01110203 |
| NM_015764   | chr12 | 16697104  | 16782721  | Greb1       | 3,19199856 | 0,00029373 | 0,00183181 |
| NM_145940   | chr11 | 109389610 | 109427479 | Wipi1       | 3,19026588 | 0,00253474 | 0,00564729 |
| AK164372    | chr14 | 119410888 | 119528458 | Myo12       | 3,18704635 | 0,00352329 | 0,00286943 |
| NM_010685   | chrX  | 34664135  | 34701082  | Lamp2       | 3,18410225 | 0,00050705 | 0,00234535 |
| BC096543    | chr14 | 120384201 | 120386678 | B930095G15R | 3,18266799 | 0,00081596 | 0,00297684 |
| BC016110    | chr5  | 29563167  | 29709017  | Lmbr1       | 3,18138139 | 0,00473295 | 0,00856643 |
| BC054786    | chr1  | 51694538  | 51860473  | Myo1b       | 3,17831768 | 0,00082499 | 0,00288278 |
| NM_177785   | chr4  | 42889100  | 42895303  | BC049635    | 3,17739988 | 0,00876124 | 0,01326041 |
| AK035642    | chr18 | 60826802  | 60874034  | Ndst1       | 3,17409799 | 0,0001286  | 0,00131739 |
| NM_017463   | chr17 | 34200526  | 34205397  | Pbx2        | 3,17390732 | 3,22E-05   | 0,00083399 |
| AK158436    | chr1  | 134183861 | 134195433 | Tmcc2       | 3,17225043 | 0,00401307 | 0,00767595 |
| NM_00100586 | chr13 | 104939167 | 105040896 | Erbp2ip     | 3,16739472 | 0,00848962 | 0,01294835 |
| NM_026886   | chr5  | 116702548 | 116852547 | 1500001A10R | 3,16699224 | 0,00301484 | 0,00629579 |
| XM_283804   | chr2  | 156701882 | 156771076 | 9830001H06R | 3,16676541 | 0,0006053  | 0,00253961 |
| NM_017467   | chr5  | 143516860 | 143535079 | Zfp316      | 3,16620207 | 0,00071373 | 0,00278211 |
| NM_198671   | chr8  | 123374842 | 123467354 | Gse1        | 3,16311644 | 0,00212149 | 0,00502048 |
| NM_011882   | chr1  | 155515148 | 155524559 | Rnasel      | 3,1613264  | 0,00969757 | 0,01440164 |
| BC006932    | chr17 | 24092564  | 24095728  | Abca3       | 3,16050844 | 0,0005122  | 0,00235094 |
| NM_00103166 | chrX  | 5344171   | 5348467   | Nutt10      | 3,15966878 | 0,01093621 | 0,01586801 |
| NM_177689   | chr6  | 17026261  | 17121833  | B930018B01  | 3,15723869 | 0,00669617 | 0,01090781 |
| BC059027    | chrX  | 165323555 | 165334900 | Mid1        | 3,15632697 | 0,00048957 | 0,00232615 |
| NM_007414   | chr16 | 38364631  | 38371922  | Adprh       | 3,15621029 | 0,00026889 | 0,00175615 |
| AK048572    | chr8  | 86205591  | 86214731  | Elmod2      | 3,15451162 | 0,00111992 | 0,00354216 |
| NM_010092   | chr7  | 27888253  | 27895683  | Dyrk1b      | 3,15425654 | 0,00015088 | 0,00138265 |
| BC058745    | chr5  | 108935290 | 108947230 | Fgfr1       | 3,15264633 | 6,51E-05   | 0,00102744 |
| NM_133990   | chrX  | 32543583  | 32602707  | Il13ra1     | 3,15197626 | 0,00830219 | 0,01273088 |
| BC090652    | chr19 | 41581880  | 41615557  | A630025C20R | 3,15134273 | 0,00201361 | 0,00492216 |
| AK132148    | chr6  | 42598063  | 42639659  | 3321401G04R | 3,15074573 | 0,00147035 | 0,00411368 |
| NM_198423   | chr11 | 120095225 | 120108372 | Bahcc1      | 3,14992323 | 0,0055439  | 0,0095462  |
| NM_013705   | chr7  | 29493549  | 29503300  | Zfp30       | 3,14738428 | 0,00074853 | 0,00283709 |
| BC052503    | chr6  | 127929526 | 128109170 | Tspan9      | 3,14647541 | 0,00137435 | 0,00397761 |
| BC079654    | chr8  | 86203131  | 86222552  | Elmod2      | 3,14511623 | 0,00168867 | 0,00466071 |
| NM_019989   | chrX  | 105298125 | 105365186 | Sh3bgrl     | 3,14211649 | 0,00264333 | 0,00580638 |
| NM_130449   | chr18 | 9707674   | 9877990   | Colec12     | 3,14146317 | 0,00306851 | 0,00635886 |
| AK078415    | chr9  | 71668268  | 71694646  | Tcf12       | 3,14108576 | 0,00493888 | 0,00883191 |
| BC010249    | chr8  | 122695198 | 122726511 | Ct11        | 3,14005537 | 0,00401781 | 0,00768009 |
| NM_010111   | chr8  | 8617405   | 8660745   | Efnb2       | 3,13799561 | 0,0103637  | 0,01518515 |
| BC075665    | chr14 | 119460135 | 119564802 | Mbnl2       | 3,13600241 | 0,0008829  | 0,00310009 |
| NM_025273   | chr10 | 60484715  | 60489676  | Pcbd1       | 3,13351088 | 0,00022042 | 0,00161643 |
| BC043719    | chr12 | 76227213  | 76319859  | Rhoj        | 3,1302112  | 0,00828151 | 0,01271751 |
| AK134169    | chr5  | 34493435  | 34504577  | Mxd4        | 3,13006655 | 9,10E-05   | 0,00112955 |
| BC049912    | chrX  | 159434369 | 159462964 | Tmem27      | 3,13003039 | 0,0053982  | 0,0093748  |
| BC022107    | chr18 | 16732717  | 16951486  | Cdh2        | 3,12957482 | 0,00016247 | 0,00142469 |
| BC003212    | chr13 | 13150739  | 13185743  | Gpr137b     | 3,12838195 | 0,0004369  | 0,00220558 |
| NM_026013   | chr3  | 106675882 | 106702901 | Tmem77      | 3,12645265 | 0,00021111 | 0,00157722 |
| NM_175414   | chr6  | 127927018 | 128109197 | Tspan9      | 3,12585314 | 0,00321005 | 0,00655646 |
| AK052439    | chr9  | 58672818  | 58683328  | Neo1        | 3,12461116 | 0,00243566 | 0,0054943  |
| AK009885    | chr6  | 8209429   | 8378760   | Glcc1       | 3,12329751 | 0,00079292 | 0,00293444 |
| BC022108    | chr7  | 101713818 | 101719138 | Folr2       | 3,12308824 | 0,01099894 | 0,01594584 |
| NM_016686   | chr11 | 87884473  | 87900918  | Vezf1       | 3,12284291 | 0,00127041 | 0,00381187 |
| NM_019636   | chr5  | 64439442  | 64629322  | Tbc1d1      | 3,12207819 | 0,00048187 | 0,00231284 |
| NM_175136   | chr8  | 32577780  | 32597417  | Rnf122      | 3,12030416 | 0,00221255 | 0,00516657 |
| NM_012043   | chr9  | 57954405  | 57957279  | Islr        | 3,11879775 | 0,00200084 | 0,00490922 |
| NM_00103408 | chr9  | 50609164  | 50646459  | Ppp2r1b     | 3,11518966 | 0,00302308 | 0,00630196 |
| AK147250    | chr11 | 120049036 | 120108371 | Bahcc1      | 3,11417496 | 0,00428412 | 0,00798184 |
| NM_010906   | chr8  | 87598718  | 87690245  | Nfix        | 3,11099627 | 0,00835705 | 0,01279679 |
| AK129171    | chr3  | 55200057  | 55225240  | Spg20       | 3,10921418 | 0,00059714 | 0,0025302  |
| NM_198247   | chr1  | 194545211 | 194556445 | Sertad4     | 3,10581092 | 0,00032247 | 0,00190758 |
| BC048946    | chr10 | 39421542  | 39512046  | Rev3l       | 3,10519385 | 0,00030427 | 0,00185674 |

|             |       |           |           |              |            |             |            |
|-------------|-------|-----------|-----------|--------------|------------|-------------|------------|
| XM_888626   | chr7  | 68472178  | 68472367  | LOC624104    | 3,0988294  | 0,00109546  | 0,00350008 |
| BC016438    | chrX  | 90788194  | 90794709  | Maged1       | 3,09673944 | 0,00047497  | 0,00229718 |
| XM_205522   | chrX  | 5752761   | 5812930   | D430043L16R  | 3,09347134 | 0,00189586  | 0,00475321 |
| AK040211    | chr9  | 48411146  | 48587856  | Zbtb16       | 3,09061368 | 0,00019606  | 0,00151809 |
| AK159999    | chr16 | 84837869  | 85057151  | App          | 3,08878617 | 0,00012092  | 0,00128228 |
| BC029089    | chr1  | 37556222  | 37569788  | 2010300C02R  | 3,08704533 | 0,00539419  | 0,0093734  |
| D90174      | chr4  | 97264689  | 97603369  | Nfia         | 3,08445016 | 0,00067581  | 0,00269873 |
| AK035077    | chr9  | 100980509 | 101055114 | 3222402P14Ri | 3,08216337 | 0,00967074  | 0,01437471 |
| BC113768    | chrX  | 70430003  | 70460673  | Tktl1        | 3,07789354 | 0,01276733  | 0,01795256 |
| AK016712    | chr8  | 120235146 | 120345407 | 4933407C03R  | 3,07770154 | 0,00263037  | 0,00578467 |
| BC060719    | chr12 | 89308455  | 90737886  | Nrxn3        | 3,07649291 | 0,00086559  | 0,0030627  |
| NM_013778   | chr13 | 4190466   | 4204848   | Akr1c13      | 3,0758177  | 0,00554986  | 0,00954868 |
| NM_007739   | chr16 | 57548055  | 57553783  | Col8a1       | 3,07576085 | 0,00412938  | 0,00779519 |
| NM_054071   | chr5  | 108934803 | 108947200 | Fgfr1        | 3,07348761 | 0,00021167  | 0,00157942 |
| NM_007496   | chr8  | 111603772 | 111846367 | Atbf1        | 3,07233032 | 0,00493108  | 0,00882326 |
| NM_025926   | chr3  | 152121481 | 152131143 | Dnajb4       | 3,07220964 | 0,0033891   | 0,00677593 |
| NM_009712   | chr13 | 94872511  | 95041668  | Arsb         | 3,06978298 | 0,00059438  | 0,00252703 |
| AK170399    | chr6  | 125498205 | 125557793 | Vwf          | 3,06749998 | 0,00422985  | 0,00790792 |
| BC025166    | chr11 | 87900459  | 87900916  | Vezf1        | 3,06577822 | 0,00119998  | 0,00369159 |
| NM_021320   | chr10 | 93070999  | 93170999  | Ntn4         | 3,0650133  | 0,001261548 | 0,01777677 |
| AK013777    | chr12 | 99114439  | 99135695  | Ptpn21       | 3,06278338 | 0,00345141  | 0,00685225 |
| BC043466    | chr6  | 37260729  | 37371718  | Creb3l2      | 3,06261355 | 0,00017874  | 0,00146584 |
| NM_177121   | chr14 | 120383885 | 120386677 | B930095G15R  | 3,06117743 | 0,00149111  | 0,00414646 |
| BC007478    | chrX  | 131591546 | 131593222 | Wbp5         | 3,06044901 | 3,84E-05    | 0,000881   |
| NM_177166   | chr15 | 60658753  | 60661080  | 9930014A18R  | 3,05904218 | 0,00827506  | 0,01271544 |
| AK029230    | chr9  | 57049279  | 57060736  | 1700017B05R  | 3,0589503  | 4,01E-05    | 0,00088495 |
| BC011101    | chrX  | 130104928 | 130106448 | Armcx3       | 3,05772784 | 0,00170874  | 0,0044879  |
| NM_173406   | chr6  | 52698374  | 52998173  | AI591476     | 3,05596919 | 0,00077332  | 0,00289971 |
| XM_484809   | chr19 | 44984429  | 45037098  | 6030443O07R  | 3,05500908 | 0,00633292  | 0,01046476 |
| BC058259    | chr5  | 89658354  | 89715484  | Rufy3        | 3,05381641 | 0,00107266  | 0,00345736 |
| XM_895709   | chr3  | 19836610  | 19883750  | Trim55       | 3,0529134  | 0,00829853  | 0,01273088 |
| NM_019825   | chr2  | 155082111 | 155129567 | Ncoa6        | 3,052462   | 0,00012198  | 0,00128279 |
| AJ567474    | chr2  | 131183383 | 131216613 | Smox         | 3,04838827 | 0,00117265  | 0,00364171 |
| NM_020295   | chr5  | 29563849  | 29708979  | Lmbr1        | 3,04831079 | 0,00045162  | 0,00224941 |
| XM_986220   | chr5  | 66041497  | 66047369  | LOC384261    | 3,045903   | 0,00340235  | 0,00679332 |
| NM_178661   | chr6  | 37260626  | 37371747  | Creb3l2      | 3,0449953  | 3,80E-05    | 0,0008798  |
| NM_011856   | chr11 | 35851070  | 36787666  | Odz2         | 3,04160611 | 0,00517274  | 0,00910172 |
| XM_485202   | chr3  | 9120846   | 9268406   | Zbtb10       | 3,03869807 | 0,00161134  | 0,00434108 |
| NM_009794   | chr1  | 184303934 | 184354199 | Capn2        | 3,03692231 | 0,00185606  | 0,00469238 |
| NM_016794   | chr6  | 72314731  | 72320090  | Vamp8        | 3,03556837 | 0,00163862  | 0,00438289 |
| XM_00100472 | chr8  | 120297164 | 120345490 | 4933407C03R  | 3,03488812 | 0,004771    | 0,00861871 |
| BC014815    | chr11 | 118854528 | 118856953 | Cbx8         | 3,03284829 | 0,00896169  | 0,01350596 |
| NM_011078   | chr13 | 48813686  | 48882820  | Phf2         | 3,03134909 | 0,00273516  | 0,00590684 |
| NM_153567   | chr5  | 73227697  | 73257960  | 5033405K12R  | 3,03050873 | 0,00572209  | 0,00974161 |
| AK220553    | chr10 | 118857379 | 119480199 | Grip1        | 3,02950062 | 0,00156338  | 0,00425805 |
| BC017648    | chr5  | 89658684  | 89716161  | Rufy3        | 3,02945162 | 0,00343369  | 0,00683528 |
| NM_013881   | chr11 | 61591854  | 61670812  | Ulk2         | 3,02545054 | 0,00472892  | 0,00856174 |
| AK078264    | chrX  | 34441937  | 34497052  | 6430550H21R  | 3,02488438 | 0,00709376  | 0,01133626 |
| NM_148926   | chr17 | 29732098  | 29937032  | Zfand3       | 3,02356376 | 0,00101232  | 0,00336247 |
| BC043337    | chr4  | 131195504 | 131239952 | Epb4.1       | 3,02283032 | 0,00127323  | 0,0038165  |
| AK047469    | chr4  | 131279452 | 131283485 | Epb4.1       | 3,02197139 | 0,00537227  | 0,00934941 |
| BC057110    | chr17 | 47330323  | 47387823  | Foxp4        | 3,02081256 | 0,00218265  | 0,00511515 |
| BC017616    | chr5  | 33530790  | 33535028  | Spn2         | 3,02050547 | 0,00294239  | 0,00620536 |
| NM_021431   | chrX  | 5222982   | 5230227   | Nudt11       | 3,01830793 | 0,00275574  | 0,0059356  |
| NM_021604   | chr4  | 155009089 | 155028935 | Agrn         | 3,0164256  | 0,00035502  | 0,00199684 |
| NM_026481   | chr8  | 108356620 | 108360496 | 2700055K07R  | 3,01639076 | 0,00748237  | 0,01181829 |
| NM_172266   | chr1  | 193419111 | 193479245 | Lpgat1       | 3,01162749 | 0,00122765  | 0,00373812 |
| AK169586    | chr6  | 134890342 | 134891213 | Cdkn1b       | 3,00766385 | 0,00569968  | 0,00971917 |
| NM_024427   | chr9  | 66821736  | 66848357  | Tpm1         | 3,00578121 | 0,00066804  | 0,00268204 |
| AK150784    | chr4  | 137488702 | 137515224 | Hp1bp3       | 3,00564926 | 0,00023378  | 0,00166324 |
| NM_172600   | chr14 | 47368526  | 47437081  | 6720456H20R  | 3,00162414 | 0,00871495  | 0,01320756 |
| XM_00100177 | chr14 | 71889470  | 71889767  | LOC668491    | 3,00032753 | 0,00340825  | 0,00680053 |
| NM_178675   | chr10 | 52379019  | 52799820  | Slc35f1      | 3,00009877 | 0,0008344   | 0,00300224 |
| AK161301    | chr17 | 71674558  | 71755019  | Rsnl2        | 2,9982278  | 0,00237564  | 0,00540595 |
| NM_029869   | chr5  | 138314871 | 138337610 | Zkscan1      | 2,99790916 | 0,00700878  | 0,011248   |
| NM_175483   | chr9  | 56715338  | 56725182  | Sh3px3       | 2,99761133 | 3,08E-07    | 0,00029564 |
| NM_177177   | chr10 | 36828973  | 36831095  | 5930403N24R  | 2,99686342 | 0,00848125  | 0,0129389  |
| AK032017    | chr3  | 29273805  | 29882124  | 6130401L20Ri | 2,99657261 | 0,01432247  | 0,01969339 |
| NM_00103317 | chr19 | 59958358  | 59998027  | Rab11fip2    | 2,99574882 | 0,0058964   | 0,0099317  |
| NM_025445   | chr15 | 83127505  | 83178013  | Arfgap3      | 2,99555502 | 0,00070517  | 0,00277141 |
| NM_145587   | chr7  | 126063766 | 126086147 | Sbk1         | 2,99481455 | 0,00035094  | 0,00198928 |
| NM_00101338 | chr8  | 10153882  | 10426671  | N/A          | 2,99307826 | 0,00782122  | 0,01224208 |
| NM_00101795 | chrX  | 34649690  | 34701082  | Lamp2        | 2,99152268 | 0,00194142  | 0,00483221 |
| NM_139064   | chr5  | 34812952  | 34830836  | Tnip2        | 2,98773046 | 0,00030249  | 0,00185674 |
| BC057380    | chr13 | 78172268  | 78629780  | 1110033M05R  | 2,9840051  | 0,00342106  | 0,00681925 |
| XM_900381   | chr4  | 120193772 | 120246247 | Kcnq4        | 2,97788904 | 0,0061975   | 0,01030669 |

|             |       |           |           |              |            |            |            |
|-------------|-------|-----------|-----------|--------------|------------|------------|------------|
| NM_029606   | chr11 | 108288106 | 108676705 | Ccdc46       | 2,97770328 | 0,00189565 | 0,00475321 |
| NM_172778   | chrX  | 15866240  | 15974323  | Maob         | 2,96978811 | 0,01267673 | 0,01784199 |
| XM_284454   | chr8  | 129474383 | 129479526 | Irf2bp2      | 2,96730522 | 0,00074073 | 0,00282367 |
| BC034161    | chrX  | 105298195 | 105365189 | Sh3bgrl      | 2,96576989 | 0,00131749 | 0,00388717 |
| BC010465    | chr6  | 17015192  | 17054853  | Tes          | 2,96398196 | 5,44E-05   | 0,00098615 |
| XM_887155   | chr3  | 59404663  | 59432185  | Igsf10       | 2,96218826 | 0,00070408 | 0,00277078 |
| NM_173393   | chr14 | 62749128  | 62774129  | Xkr6         | 2,96211298 | 0,00491113 | 0,00880038 |
| BC106180    | chr6  | 114867527 | 114870749 | N/A          | 2,96087448 | 0,00081897 | 0,00297684 |
| BC034255    | chr1  | 43390556  | 43515060  | Nck2         | 2,9606761  | 0,00411429 | 0,00779251 |
| BC099420    | chr4  | 32830159  | 32845900  | Bach2        | 2,95945872 | 0,00160498 | 0,00432983 |
| BC030498    | chr1  | 148259939 | 148664595 | B830045N13R  | 2,95878186 | 0,01041434 | 0,0152481  |
| XM_283903   | chr3  | 109099052 | 109192315 | B430201A12R  | 2,9573056  | 0,00118472 | 0,00366352 |
| BC054745    | chr6  | 5340470   | 5382196   | Asb4         | 2,95661556 | 0,00027197 | 0,0017663  |
| NM_172872   | chr4  | 98246915  | 98309555  | Ankrd38      | 2,95568666 | 0,00790388 | 0,01233585 |
| NM_133891   | chr4  | 53461756  | 53643578  | Slc44a1      | 2,95528377 | 0,00607425 | 0,0101584  |
| NM_019654   | chr17 | 87016004  | 87045911  | Socs5        | 2,95516087 | 0,00591541 | 0,00995418 |
| NM_025613   | chr2  | 125364535 | 125366224 | Cri1         | 2,95430068 | 0,00476655 | 0,00861679 |
| NM_027530   | chr5  | 89658134  | 89717257  | Rufy3        | 2,95354993 | 0,01292902 | 0,0181414  |
| NM_027166   | chr17 | 72741703  | 72756195  | Ypel5        | 2,95138065 | 0,00736724 | 0,01166937 |
| BC106118    | chr17 | 88438583  | 88496691  | 1110018J12Ri | 2,94954005 | 0,00399423 | 0,00183654 |
| AK132781    | chr13 | 48591146  | 48637518  | AW456874     | 2,94836131 | 0,00011947 | 0,00127194 |
| AK085394    | chr7  | 89263535  | 89266515  | N/A          | 2,94760526 | 0,0047976  | 0,00864148 |
| BC017137    | chr4  | 131195504 | 131197088 | Epb4.1       | 2,94760526 | 0,00171813 | 0,00449545 |
| XM_978420   | chr2  | 30594652  | 30605415  | LOC665645    | 2,9473601  | 0,00773363 | 0,01213366 |
| NM_008325   | chr5  | 108909666 | 108924856 | Idua         | 2,94729881 | 0,00169042 | 0,00446107 |
| BC011071    | chr1  | 43478095  | 43515060  | Nck2         | 2,94582147 | 0,00280913 | 0,00600073 |
| NM_010142   | chr4  | 135925683 | 136108011 | Ephb2        | 2,94344703 | 0,00340236 | 0,00679332 |
| NM_027760   | chr6  | 145765541 | 145774743 | Rassf8       | 2,94242029 | 0,00029736 | 0,00183867 |
| NM_029926   | chr15 | 94371899  | 94396212  | Irak4        | 2,94215516 | 0,0111297  | 0,01607443 |
| AK155776    | chr3  | 133450762 | 133481608 | N/A          | 2,94193084 | 0,00085997 | 0,00305186 |
| AK168644    | chr6  | 71423418  | 71440388  | Rnf103       | 2,941591   | 0,0001309  | 0,00132503 |
| NM_023217   | chr8  | 73578099  | 73588670  | Pgpep1       | 2,94036788 | 0,00041308 | 0,00212047 |
| NM_009790   | chr12 | 100600590 | 100610856 | Calm1        | 2,93956633 | 0,00153047 | 0,00420209 |
| AK042730    | chr12 | 90381532  | 90738467  | Nrxn3        | 2,93669479 | 0,01455264 | 0,01997763 |
| NM_008750   | chr11 | 76074152  | 76215336  | Nxn          | 2,9365523  | 0,00168016 | 0,00444414 |
| NM_153807   | chr11 | 94373191  | 94417876  | BC018371     | 2,93579249 | 0,00450915 | 0,0082617  |
| BC030484    | chr8  | 24253711  | 24271111  | Ap3m2        | 2,93114973 | 0,0041448  | 0,00781261 |
| NM_030179   | chr17 | 71686803  | 71761624  | Rsnl2        | 2,9267645  | 0,00046335 | 0,00227609 |
| NM_0010253C | chr17 | 93072175  | 93123044  | Pja2         | 2,92655488 | 0,0005705  | 0,00247113 |
| BC026532    | chr16 | 91776252  | 91801206  | Itsn1        | 2,92600723 | 0,0033203  | 0,00670049 |
| BC095994    | chr15 | 7153865   | 7345335   | AU040377     | 2,92325024 | 0,00202641 | 0,00493928 |
| NM_0010057E | chr4  | 98038651  | 98181029  | Inadl        | 2,92104922 | 0,00442295 | 0,00816903 |
| BC079659    | chr9  | 66575164  | 66594599  | Aph1b        | 2,91917358 | 0,00478041 | 0,00862343 |
| AK077062    | chr6  | 98894928  | 98993655  | Foxp1        | 2,91851942 | 0,00241164 | 0,00545455 |
| NM_019492   | chr4  | 62046207  | 62146197  | Rgs3         | 2,91825644 | 0,00525961 | 0,00921205 |
| NM_008088   | chr11 | 67349192  | 67501154  | Gas7         | 2,91606592 | 0,00969852 | 0,01440164 |
| AF075462    | chr15 | 63918291  | 64212410  | Ddef1        | 2,91574927 | 0,00023961 | 0,0016811  |
| NM_008548   | chr10 | 53594447  | 53764211  | Man1a        | 2,91160235 | 0,00192097 | 0,00479599 |
| AF007248    | chr2  | 124992876 | 125197044 | Fbn1         | 2,91073467 | 0,00038806 | 0,00206033 |
| NM_0010143S | chr9  | 57034692  | 57048001  | Trcg1        | 2,90960505 | 0,0015498  | 0,00423267 |
| AK003781    | chr17 | 88487055  | 88496691  | 1110018J12Ri | 2,90846243 | 0,00872432 | 0,01321168 |
| BC052052    | chr6  | 124879301 | 124883279 | 2610009E16R  | 2,90754194 | 0,00177183 | 0,00456707 |
| AK039274    | chr13 | 56105177  | 56145152  | H2afy        | 2,90736056 | 0,00015005 | 0,00138265 |
| AK039728    | chr10 | 88497531  | 88686935  | Tmem16d      | 2,90651429 | 0,00952627 | 0,01418473 |
| BC072650    | chr8  | 11198402  | 11312661  | Col4a1       | 2,90370857 | 0,00207485 | 0,00498443 |
| NM_146057   | chr15 | 31169013  | 31218924  | Dap          | 2,90127423 | 0,00056169 | 0,00244618 |
| AK085367    | chr8  | 120143093 | 120332165 | 4933407C03R  | 2,89947159 | 0,00024259 | 0,00169046 |
| NM_010882   | chr7  | 62227297  | 62228878  | Ndn          | 2,89926392 | 0,00552816 | 0,00952845 |
| NM_010470   | chr4  | 137488737 | 137515236 | Hp1bp3       | 2,89913665 | 0,00045403 | 0,00225577 |
| NM_008684   | chr9  | 58674676  | 58834445  | Neo1         | 2,89887542 | 0,00059754 | 0,0025302  |
| NM_201362   | chr18 | 70050927  | 70094853  | Ccdc68       | 2,89717467 | 0,00689262 | 0,01110943 |
| XM_00100211 | chr3  | 98555703  | 98556075  | LOC668537    | 2,89621091 | 0,00556638 | 0,00956686 |
| NM_025571   | chr16 | 4531693   | 4540174   | Magma        | 2,89587635 | 3,44E-05   | 0,00083399 |
| NM_023622   | chr9  | 21721928  | 21739855  | Rgl3         | 2,89417067 | 0,00094666 | 0,00324552 |
| BC046226    | chr12 | 11352357  | 11462897  | Vsnl1        | 2,8933015  | 0,01098775 | 0,01593892 |
| AY356531    | chr14 | 26479710  | 27144141  | D14Ertd171e  | 2,89221206 | 0,00697717 | 0,01120935 |
| AK080401    | chr19 | 45036540  | 45037092  | 6030443O07R  | 2,89014792 | 0,01332397 | 0,01860799 |
| NM_007936   | chr1  | 77250332  | 77398236  | Epha4        | 2,89007447 | 0,01379897 | 0,01911909 |
| BC080862    | chr12 | 82116869  | 82251516  | Slc8a3       | 2,88992089 | 0,00101929 | 0,00337061 |
| BC003797    | chr11 | 61061050  | 61083284  | Aldh3a2      | 2,88737135 | 0,01324256 | 0,01850296 |
| BC020042    | chr13 | 5860791   | 5867031   | Klf6         | 2,88735801 | 0,00019685 | 0,00151829 |
| AK147576    | chr6  | 92336413  | 92500365  | Prickle2     | 2,88509069 | 0,00573719 | 0,00975702 |
| NM_170758   | chr11 | 114706130 | 114720741 | Cd300a       | 2,88390439 | 0,00298851 | 0,00625953 |
| NM_00103327 | chr15 | 84773485  | 84815737  | 5031439G07R  | 2,88328477 | 0,00017415 | 0,00145326 |
| NM_021470   | chr5  | 29526864  | 29556309  | Rnf32        | 2,88074774 | 0,01396023 | 0,0192798  |
| XM_131212   | chr3  | 137805177 | 137846318 | Dnajb14      | 2,87981606 | 0,00068206 | 0,00271638 |

|             |       |           |           |              |            |            |            |
|-------------|-------|-----------|-----------|--------------|------------|------------|------------|
| M97635      | chr9  | 71642811  | 71910353  | Tcf12        | 2,87722225 | 0,0045344  | 0,00829013 |
| NM_00103958 | chr17 | 24079645  | 24137801  | Abca3        | 2,87376083 | 0,00051617 | 0,00235818 |
| XM_00100015 | chr12 | 92090022  | 92091670  | LOC666955    | 2,87328281 | 0,00025039 | 0,00170185 |
| BC002244    | chr1  | 169995005 | 170268070 | Pbx1         | 2,87078774 | 1,37E-05   | 0,00060233 |
| BC052435    | chr12 | 82116869  | 82251799  | Slc8a3       | 2,87001843 | 0,00127307 | 0,0038165  |
| NM_024467   | chr8  | 98215264  | 98221079  | Zfp319       | 2,86929572 | 0,00038879 | 0,00206033 |
| AK028181    | chr4  | 137488710 | 137515228 | Hp1bp3       | 2,86905044 | 7,37E-05   | 0,00107951 |
| NM_198012   | chr7  | 102551399 | 102561075 | Trim68       | 2,8663405  | 0,00183646 | 0,00467306 |
| XM_205324   | chrX  | 62913671  | 62917110  | Slitrk2      | 2,86451323 | 0,00106885 | 0,00345204 |
| BC003967    | chr10 | 59742291  | 59765203  | 4632428N05R  | 2,86391763 | 0,00828281 | 0,01271751 |
| XM_283179   | chr13 | 103852871 | 104455486 | Most4        | 2,86016161 | 0,00077765 | 0,0029068  |
| XM_994782   | chr12 | 89364565  | 89365561  | LOC666915    | 2,85875437 | 0,01392214 | 0,01923778 |
| NM_016719   | chr2  | 64713316  | 64823605  | Grb14        | 2,85753929 | 0,00450488 | 0,00825834 |
| XM_901172   | chr15 | 79439571  | 79486199  | 4933432B09R  | 2,85742705 | 0,01216657 | 0,01724201 |
| U43884      | chr2  | 152427773 | 152428521 | Id1          | 2,85699795 | 0,01448352 | 0,0198919  |
| NM_00103795 | chr13 | 30667565  | 30717924  | Dusp22       | 2,85665471 | 0,0009087  | 0,00314981 |
| BC090960    | chr8  | 27496215  | 27584679  | Hook3        | 2,85406858 | 0,00241568 | 0,00546162 |
| NM_009557   | chr4  | 135558144 | 135566018 | Zfp46        | 2,8535213  | 0,01062855 | 0,01549705 |
| BC057629    | chr2  | 68662352  | 68910312  | Lass6        | 2,85319167 | 0,00058587 | 0,00251293 |
| BC049997    | chr10 | 30336347  | 30345532  | Loco7        | 2,84919297 | 9,30E-05   | 0,0011391  |
| AK077884    | chr14 | 33204595  | 33233376  | Mmrn2        | 2,84781744 | 0,00324624 | 0,00660715 |
| AK146545    | chr15 | 63918213  | 64212429  | Ddef1        | 2,84597568 | 0,00011258 | 0,00123072 |
| NM_008984   | chr17 | 66572487  | 67259332  | Ptprm        | 2,84468058 | 0,00081598 | 0,00297684 |
| NM_007405   | chr15 | 98418011  | 98435667  | Adcy6        | 2,84380656 | 0,00037654 | 0,00204961 |
| AK154941    | chr5  | 89639600  | 89725951  | Rufy3        | 2,84338607 | 0,00059217 | 0,00252539 |
| NM_178357   | chr12 | 25240352  | 25251754  | Tieg3        | 2,84184263 | 0,01197988 | 0,01702163 |
| XM_483931   | chr10 | 82128805  | 82171191  | Hcfc2        | 2,8402344  | 0,00030405 | 0,00185674 |
| NM_011446   | chr14 | 62897815  | 62904842  | Sox7         | 2,83991287 | 0,00743431 | 0,01175686 |
| NM_022315   | chr17 | 14016131  | 14141361  | Smoc2        | 2,83763035 | 0,00554471 | 0,0095462  |
| BC066200    | chr3  | 107869795 | 107888279 | Csf1         | 2,83754512 | 0,00640501 | 0,01055463 |
| NM_181397   | chr17 | 49458873  | 49656064  | 2310015N21R  | 2,83725667 | 0,00210456 | 0,00501057 |
| BC010712    | chr2  | 125364555 | 125365543 | Cri1         | 2,83681749 | 0,0023745  | 0,00540563 |
| BC107234    | chr7  | 138097937 | 138235688 | Tcerg1l      | 2,83575586 | 0,00652506 | 0,01069334 |
| AK143026    | chr15 | 32189391  | 32635640  | Sema5a       | 2,83570345 | 0,0023285  | 0,00532963 |
| NM_010828   | chr10 | 17412661  | 17415072  | Cited2       | 2,8333654  | 0,00332774 | 0,00670723 |
| NM_145612   | chr9  | 22027149  | 22058040  | BC005471     | 2,83179468 | 0,00330234 | 0,00667477 |
| NM_00102558 | chr3  | 106675882 | 106702901 | Tmem77       | 2,83141522 | 0,00025247 | 0,00170812 |
| BC046300    | chr1  | 51695563  | 51860469  | Myo1b        | 2,82889115 | 6,17E-05   | 0,00102496 |
| NM_007437   | chr11 | 61060949  | 61083322  | Aldh3a2      | 2,82887154 | 0,00377244 | 0,00733811 |
| NM_153802   | chr7  | 11781385  | 11793601  | Zfp128       | 2,82882579 | 0,01136681 | 0,0163338  |
| NM_010160   | chr2  | 6459140   | 6802241   | Cugbp2       | 2,82676118 | 0,00404878 | 0,00771311 |
| AK080394    | chr3  | 59266851  | 59283033  | Gpr87        | 2,82555316 | 0,00697148 | 0,01120323 |
| NM_00101098 | chr7  | 6310045   | 6334505   | Peg3         | 2,822943   | 0,00034146 | 0,00195919 |
| XM_900427   | chr1  | 54705431  | 54870932  | Ankrd44      | 2,82103259 | 0,00343864 | 0,00684057 |
| NM_008306   | chr18 | 60811331  | 60838758  | Ndst1        | 2,81579905 | 0,00024799 | 0,00170185 |
| NM_183355   | chr1  | 169994680 | 170268530 | Pbx1         | 2,81573195 | 4,13E-05   | 0,000887   |
| NM_00102561 | chr3  | 96189931  | 96246534  | Za20d1       | 2,81553028 | 0,00044831 | 0,00223669 |
| NM_010748   | chr13 | 13382534  | 13569566  | Lyst         | 2,81495137 | 0,00187646 | 0,00472243 |
| NM_010026   | chr15 | 63918211  | 64212592  | Ddef1        | 2,81467822 | 0,00014018 | 0,00134116 |
| NM_177583   | chr9  | 66574630  | 66594567  | Aph1b        | 2,81427505 | 0,00221104 | 0,00516657 |
| NM_018747   | chr10 | 24859537  | 24988579  | Akap7        | 2,81346237 | 0,00498988 | 0,00889112 |
| BC094314    | chr11 | 72993471  | 72998241  | Tax1bp3      | 2,81238999 | 0,00024334 | 0,00169087 |
| NM_009526   | chr1  | 74705164  | 74718155  | Wnt6         | 2,81215608 | 0,01117207 | 0,01613172 |
| AK030951    | chr19 | 44995288  | 45035926  | 6030443007R  | 2,81032439 | 0,00096426 | 0,00328696 |
| NM_176919   | chr10 | 122082078 | 122324989 | Ppm1h        | 2,81011012 | 0,00164881 | 0,00440028 |
| AK147669    | chr8  | 14911639  | 15001053  | Arhgef10     | 2,80922725 | 0,00295483 | 0,00622279 |
| AK038731    | chr16 | 43540208  | 43543287  | Zbtb20       | 2,80883134 | 0,00143044 | 0,00405723 |
| NM_011785   | chr1  | 178858790 | 179085442 | Akt3         | 2,80851985 | 0,00199609 | 0,00490922 |
| NM_172930   | chrX  | 34441932  | 34497024  | 6430550H21R  | 2,80809161 | 0,01247486 | 0,01761191 |
| AK014882    | chr10 | 120168833 | 120181946 | 4921513I03Ri | 2,80739098 | 0,00854067 | 0,01300676 |
| AK045974    | chr17 | 78956963  | 78995301  | Qpct         | 2,80687211 | 0,00778516 | 0,01219205 |
| NM_00103405 | chrX  | 49035826  | 49044095  | 6330534C20R  | 2,80685914 | 0,01385285 | 0,01915813 |
| BC056975    | chr3  | 79972087  | 80029311  | 1110032E23R  | 2,80280881 | 0,01419374 | 0,01954795 |
| NM_175108   | chr19 | 9056328   | 9143964   | N/A          | 2,80179875 | 0,0069133  | 0,01113675 |
| AK082993    | chr3  | 98467896  | 98497606  | Gja5         | 2,80025848 | 0,00050402 | 0,00234312 |
| XM_897869   | chr9  | 101048836 | 101055304 | 3222402P14Ri | 2,79629519 | 0,00227917 | 0,00526155 |
| NM_183208   | chr14 | 24292475  | 24497903  | Rai17        | 2,79499687 | 0,00048042 | 0,00230991 |
| BC057030    | chr3  | 94498699  | 94518037  | Tdrkh        | 2,79449966 | 0,00314386 | 0,00645222 |
| BC079875    | chr4  | 131195504 | 131320983 | Epb4.1       | 2,79382825 | 0,00169688 | 0,00446925 |
| NM_015820   | chr14 | 118273482 | 119004997 | Hs6st3       | 2,79367979 | 0,00307341 | 0,00636017 |
| BC013446    | chr9  | 110566957 | 110591938 | Pthr1        | 2,79361524 | 0,00244029 | 0,00550003 |
| NM_183191   | chr3  | 63784165  | 63938968  | Plch1        | 2,79284079 | 0,00770116 | 0,01209545 |
| NM_013531   | chr3  | 32775074  | 32808084  | Gnb4         | 2,79282789 | 0,00198818 | 0,00489858 |
| BC054540    | chr9  | 58674693  | 58834562  | Neo1         | 2,79105393 | 0,00060611 | 0,00254124 |
| NM_010349   | chr10 | 48789403  | 49471824  | Grik2        | 2,79100879 | 0,00210021 | 0,00501057 |
| NM_198160   | chr10 | 127862242 | 127893121 | Smarcc2      | 2,78993853 | 5,49E-05   | 0,00098615 |

|             |       |           |           |              |            |            |            |
|-------------|-------|-----------|-----------|--------------|------------|------------|------------|
| NM_00103953 | chr7  | 4637532   | 4641521   | C730049F21R  | 2,78988051 | 0,00618921 | 0,01030171 |
| NM_030137   | chr2  | 30417052  | 30430927  | Cstad        | 2,78825015 | 0,00184438 | 0,00467923 |
| NM_177919   | chrX  | 131547314 | 131550217 | Tceal5       | 2,7880118  | 0,00872307 | 0,01321168 |
| NM_00100879 | chr4  | 62901270  | 62982312  | Whrn         | 2,78661431 | 1,13E-06   | 0,00035401 |
| NM_00103905 | chr3  | 156497086 | 157251740 | Negr1        | 2,78545563 | 0,0089838  | 0,01353244 |
| NM_010688   | chr11 | 97615761  | 97654854  | Lasp1        | 2,78394363 | 0,00021555 | 0,00159242 |
| NM_207652   | chr14 | 75149975  | 75241914  | Tsc22d1      | 2,77957954 | 7,05E-05   | 0,00105565 |
| BC015265    | chr10 | 53595428  | 53764112  | Man1a        | 2,77593413 | 0,00211061 | 0,00501701 |
| XM_00100518 | chr17 | 78956963  | 78995436  | Qpct         | 2,77453628 | 0,00281409 | 0,00600917 |
| AK076926    | chr11 | 67363348  | 67501169  | Gas7         | 2,77384403 | 0,01339952 | 0,01868287 |
| NM_026993   | chr3  | 145696112 | 145829059 | Ddah1        | 2,77249848 | 0,00132682 | 0,0039045  |
| AK169978    | chr11 | 32247819  | 32309151  | G431001E03R  | 2,77171707 | 0,0026189  | 0,00577437 |
| NM_027927   | chr3  | 133029258 | 133048294 | Ints12       | 2,77093589 | 0,0017332  | 0,0045058  |
| BC062147    | chr17 | 34200345  | 34204599  | Pbx2         | 2,77079505 | 2,00E-05   | 0,0006852  |
| NM_173870   | chr1  | 37389101  | 37480678  | Mgat4a       | 2,76725067 | 0,00113348 | 0,00356801 |
| BC031532    | chr9  | 100963037 | 101001751 | 3222402P14Ri | 2,76345541 | 4,23E-05   | 0,0008919  |
| NM_009116   | chr2  | 30667289  | 30703262  | Prrx2        | 2,76278507 | 0,00230045 | 0,00528935 |
| NM_026185   | chr11 | 77331315  | 77336240  | 1300007F04Ri | 2,76272124 | 0,00685678 | 0,01107262 |
| AK148439    | chr16 | 84838385  | 85057025  | App          | 2,76178944 | 0,00082907 | 0,00299208 |
| NM_031166   | chr13 | 48273363  | 48273573  | Id4          | 2,76104934 | 0,00597891 | 0,01004119 |
| NM_172475   | chr2  | 4070143   | 4531214   | Frm4a        | 2,76023927 | 0,01154087 | 0,01651705 |
| BC033449    | chr4  | 62160399  | 62189376  | Rgs3         | 2,756339   | 0,00266305 | 0,00582901 |
| BC017156    | chr9  | 66316345  | 66391095  | Usp3         | 2,75484281 | 1,77E-05   | 0,00064214 |
| NM_007378   | chr3  | 122036481 | 122172083 | Abca4        | 2,75461368 | 0,00412329 | 0,0079519  |
| NM_00103320 | chr9  | 71302906  | 71390920  | AA407270     | 2,7538055  | 0,00033682 | 0,00194858 |
| BC055739    | chr19 | 53956727  | 53983163  | Pdcd4        | 2,75102007 | 0,00071217 | 0,00278211 |
| BC055920    | chr11 | 3230809   | 3242973   | 1500004A08R  | 2,74938066 | 0,00201624 | 0,00492338 |
| NM_008858   | chr12 | 51217853  | 51571105  | Prkcm        | 2,74930443 | 0,00138741 | 0,00399408 |
| BC071210    | chr18 | 65149274  | 65338562  | Nedd4l       | 2,74888522 | 0,00018899 | 0,00149633 |
| NM_008377   | chr6  | 94569991  | 94665608  | Lrig1        | 2,74852322 | 0,00113132 | 0,00356497 |
| XM_898043   | chr10 | 74504611  | 74628764  | Bcr          | 2,74689164 | 0,00264976 | 0,00581659 |
| XM_00100246 | chr3  | 101989180 | 102054259 | Slc22a15     | 2,74672663 | 9,59E-05   | 0,00115704 |
| NM_007564   | chr12 | 81026599  | 81031853  | Zfp361l      | 2,74303558 | 0,00173065 | 0,00450339 |
| BC057669    | chr15 | 31169047  | 31218929  | Dap          | 2,74138192 | 0,00049918 | 0,00234177 |
| BC096419    | chr16 | 4531692   | 4540154   | Magmas       | 2,74106524 | 0,00027713 | 0,00178148 |
| AK155828    | chr13 | 56619210  | 56648974  | Tgfb1        | 2,737323   | 0,01005698 | 0,01484886 |
| NM_026324   | chr9  | 34238295  | 34785975  | Kirrel3      | 2,73508689 | 0,00160915 | 0,00433714 |
| BC022177    | chr1  | 153651095 | 153652818 | N/A          | 2,73489732 | 7,62E-05   | 0,00108714 |
| BC060266    | chr3  | 145789634 | 145831663 | Ddah1        | 2,73449925 | 0,00117278 | 0,00364171 |
| XM_904306   | chr6  | 47991980  | 48038967  | Zfp746       | 2,72856044 | 0,00521543 | 0,00914607 |
| XM_486560   | chr5  | 26450728  | 26452161  | LOC434689    | 2,7281633  | 0,00792117 | 0,0123531  |
| BC053705    | chr13 | 34187109  | 34306532  | 3110004L20Ri | 2,72745741 | 9,62E-05   | 0,0011585  |
| NM_00102491 | chr5  | 66042655  | 66105919  | B3bp         | 2,72632332 | 0,0005139  | 0,0023543  |
| NM_028732   | chr10 | 59742260  | 59768041  | 4632428N05R  | 2,7256557  | 0,00203489 | 0,00495184 |
| BC058390    | chr1  | 169995007 | 170268572 | Pbx1         | 2,72517712 | 0,00100622 | 0,00336247 |
| XM_128932   | chr18 | 58681608  | 58738238  | Slc27a6      | 2,72415099 | 0,01316505 | 0,01841591 |
| AK031837    | chr6  | 98917663  | 98969143  | Foxp1        | 2,72294907 | 0,0038767  | 0,00748085 |
| BC016892    | chr15 | 85563548  | 85629499  | Ppara        | 2,72248355 | 0,00332709 | 0,00670723 |
| NM_033567   | chr6  | 120454557 | 120459426 | Cecr6        | 2,72155275 | 0,00045936 | 0,00226656 |
| NM_011037   | chr19 | 44810704  | 44889338  | Pax2         | 2,72144586 | 6,46E-05   | 0,00102744 |
| NM_194263   | chr9  | 24473610  | 24524709  | Tbx20        | 2,71924599 | 0,00910868 | 0,01367563 |
| NM_00100277 | chr4  | 123404421 | 123405937 | AB130007C19R | 2,7187811  | 0,00074612 | 0,00283334 |
| AK162293    | chr9  | 21276593  | 21295733  | DB124611     | 2,7180902  | 0,00550443 | 0,00950679 |
| NM_019483   | chr3  | 54843510  | 54889186  | Smad9        | 2,71773854 | 0,01418206 | 0,01954401 |
| NM_026514   | chr17 | 79239082  | 79260138  | Cdc42ep3     | 2,71705418 | 0,0121022  | 0,01716711 |
| XM_00100472 | chr9  | 101066991 | 101108095 | 3222402P14Ri | 2,71698512 | 0,00346834 | 0,00688128 |
| AF237770    | chr15 | 84059830  | 84140818  | Parvb        | 2,71441881 | 0,00244317 | 0,00550289 |
| XM_892331   | chr8  | 85742821  | 85974276  | Rnf150       | 2,71438118 | 0,0017846  | 0,00459017 |
| NM_198311   | chr12 | 99321661  | 99384288  | Ttc8         | 2,71343434 | 0,00661366 | 0,01080883 |
| AK165300    | chr2  | 24876443  | 24884888  | Nelf         | 2,71295791 | 0,00082757 | 0,00298849 |
| NM_028767   | chr17 | 47330323  | 47387634  | Foxp4        | 2,7120241  | 0,00045735 | 0,0022628  |
| XM_283556   | chr19 | 37964177  | 38108721  | Fer1l3       | 2,71171708 | 0,00812868 | 0,01258417 |
| AK146971    | chr10 | 127862256 | 127893071 | Smarcc2      | 2,71124722 | 0,00010641 | 0,00120915 |
| XM_00100403 | chr4  | 153014512 | 153119521 | Megf6        | 2,71050187 | 0,00098716 | 0,00332851 |
| BC059866    | chr10 | 79021068  | 79025853  | Shc2         | 2,70704712 | 0,00016232 | 0,00142469 |
| NM_020513   | chr14 | 51385025  | 51385958  | Olfr1508     | 2,70637171 | 0,01339796 | 0,01868287 |
| NM_054056   | chr10 | 107736298 | 107817863 | Pawr         | 2,70632794 | 0,00097905 | 0,00331618 |
| NM_177225   | chr15 | 53291883  | 53732519  | Samd12       | 2,70540891 | 0,00844855 | 0,01289891 |
| NM_178710   | chr9  | 50645030  | 50761303  | Sfn1lk2      | 2,70518389 | 0,00061688 | 0,00256683 |
| NM_009594   | chr2  | 31581990  | 31626236  | Abl1         | 2,70477765 | 0,00280215 | 0,00599711 |
| NM_021411   | chr11 | 114970274 | 114978318 | Rab37        | 2,70470266 | 0,00681177 | 0,01102201 |
| NM_007933   | chr11 | 70473990  | 70478708  | Eno3         | 2,70469641 | 0,00048277 | 0,00231284 |
| BC058100    | chr17 | 63563527  | 63824671  | Fert2        | 2,70422151 | 6,41E-05   | 0,00102744 |
| AK081332    | chrX  | 6102958   | 6105322   | Dgkk         | 2,70247262 | 0,00785387 | 0,01228674 |
| BC026867    | chr10 | 94005055  | 94017915  | Tmcc3        | 2,70215419 | 0,00804902 | 0,01248517 |
| AK133063    | chr5  | 34324046  | 34486302  | Poln         | 2,70202933 | 0,00677279 | 0,01099356 |



|             |       |           |           |              |            |            |            |
|-------------|-------|-----------|-----------|--------------|------------|------------|------------|
| NM_015756   | chr5  | 93758638  | 94040158  | Shrm         | 2,70176713 | 4,52E-05   | 0,00091026 |
| NM_015804   | chr8  | 12757200  | 12865150  | Atp11a       | 2,7012553  | 1,44E-05   | 0,00060233 |
| NM_019635   | chr15 | 34821195  | 35100274  | Stk3         | 2,70062501 | 0,00023938 | 0,0016811  |
| BC027062    | chr14 | 47106956  | 47178773  | Peli2        | 2,69990754 | 0,00149686 | 0,0041547  |
| NM_00103522 | chr6  | 72027121  | 72084079  | St3gal5      | 2,69927132 | 0,00059195 | 0,00252539 |
| NM_009754   | chr2  | 127817478 | 127853613 | Bcl2l11      | 2,69917778 | 0,00196975 | 0,00487693 |
| NM_133187   | chr3  | 79971914  | 80029312  | 1110032E23R  | 2,69904681 | 0,00450209 | 0,00825672 |
| NM_009154   | chr15 | 32361947  | 32640922  | Sema5a       | 2,69706446 | 0,01166404 | 0,01666451 |
| NM_145398   | chr6  | 4551065   | 4593381   | Casd1        | 2,6970146  | 0,00223789 | 0,00519965 |
| BC019527    | chr17 | 14016155  | 14141362  | Smoc2        | 2,69677782 | 0,00314366 | 0,00645222 |
| AK075809    | chrX  | 81301040  | 81397130  | Dmd          | 2,69653483 | 0,00364181 | 0,00713181 |
| NM_007317   | chr10 | 82158147  | 82169273  | Hcfc2        | 2,69636661 | 0,00124007 | 0,00374691 |
| NM_009866   | chr8  | 105522123 | 105674205 | Cdh11        | 2,69439867 | 0,01417407 | 0,01953892 |
| BC027199    | chr7  | 66138132  | 66144396  | Lrrk1        | 2,69253171 | 0,00509954 | 0,00902716 |
| BC039746    | chr18 | 65149274  | 65338556  | Nedd4l       | 2,69220823 | 0,00038906 | 0,00206033 |
| NM_007232   | chr13 | 48589808  | 48637510  | AW456874     | 2,69025576 | 0,00187241 | 0,00471776 |
| AY015061    | chr14 | 56676299  | 56688410  | Lats2        | 2,69000714 | 0,00379964 | 0,00737942 |
| AK078614    | chr10 | 27764265  | 27954089  | Ptprk        | 2,68926141 | 0,00487199 | 0,00874903 |
| AK016814    | chr11 | 43430462  | 43432471  | 4933415A04R  | 2,6881929  | 0,01356792 | 0,01886472 |
| NM_009409   | chr14 | 15158472  | 15224054  | Zfp319       | 2,68798173 | 0,00338867 | 0,00374691 |
| XM_147850   | chr14 | 54808086  | 54828812  | BC030046     | 2,6873297  | 0,0001817  | 0,00147387 |
| BC072639    | chr1  | 37556222  | 37664357  | 2010300C02R  | 2,68633023 | 0,0067664  | 0,01098917 |
| AJ537610    | chr7  | 27889075  | 27895703  | Dyrk1b       | 2,68607577 | 1,21E-05   | 0,0005908  |
| NM_0085424  | chr18 | 36654122  | 36674050  | Slc4a9       | 2,68574066 | 0,00228483 | 0,00526891 |
| NM_033444   | chr17 | 34658298  | 34666775  | Clic1        | 2,68465493 | 0,00024397 | 0,00169329 |
| BC008166    | chr11 | 72993456  | 72998241  | Tax1bp3      | 2,67980248 | 0,00148099 | 0,00412988 |
| AK158259    | chr2  | 27845869  | 27852446  | N/A          | 2,67812506 | 0,00478076 | 0,00862343 |
| AK148655    | chr8  | 98212142  | 98214392  | Zfp319       | 2,67672081 | 0,00010916 | 0,00122332 |
| NM_012015   | chr13 | 56083795  | 56145137  | H2afy        | 2,67484137 | 0,00077672 | 0,00290514 |
| BC060135    | chrX  | 68215740  | 68225437  | Prrg3        | 2,67439025 | 0,00220931 | 0,00516657 |
| NM_145820   | chr3  | 66145033  | 66384748  | Veph1        | 2,67272857 | 0,00049561 | 0,00233774 |
| NM_177011   | chr15 | 57546158  | 57567905  | 9330154K18R  | 2,67033398 | 0,00695003 | 0,01118314 |
| NM_178046   | chr18 | 4920564   | 5058388   | Svil         | 2,66983392 | 0,00115171 | 0,00360919 |
| XM_358407   | chr11 | 78642798  | 78654461  | 1810012P15Ri | 2,66826138 | 0,00169043 | 0,00446107 |
| NM_028493   | chr13 | 76335538  | 76409826  | Rhobtb3      | 2,66718273 | 0,00269234 | 0,00586647 |
| AK132210    | chr6  | 4638611   | 4697080   | Sgce         | 2,66675139 | 0,00047221 | 0,00229442 |
| NM_025278   | chr6  | 66826033  | 66950872  | Gng12        | 2,66635708 | 0,00898865 | 0,01353633 |
| BC012244    | chr2  | 91730661  | 91732805  | Mdk          | 2,66217732 | 3,32E-05   | 0,00083399 |
| NM_019827   | chr16 | 38008239  | 38165318  | Gsk3b        | 2,65965048 | 0,00018964 | 0,00149871 |
| BC086635    | chr3  | 8646440   | 8650097   | Hey1         | 2,6595503  | 0,01231512 | 0,01742144 |
| BC057009    | chr8  | 8617861   | 8661033   | Efnb2        | 2,65551805 | 0,00591126 | 0,009995   |
| AK051850    | chr5  | 96979598  | 97022165  | Fras1        | 2,65513767 | 0,0023914  | 0,00542895 |
| NM_172495   | chr10 | 30335742  | 30492354  | Ncoa7        | 2,65340826 | 0,00294895 | 0,00621479 |
| AK042621    | chr18 | 65014397  | 65338560  | Nedd4l       | 2,65339599 | 0,0003525  | 0,00199391 |
| BC059241    | chr15 | 40485215  | 40934659  | Zfpm2        | 2,65087749 | 0,0070942  | 0,01133626 |
| NM_00102557 | chr6  | 34875445  | 34908151  | Gm468        | 2,65062639 | 0,00575161 | 0,00976812 |
| XM_00100334 | chr16 | 45820380  | 45820935  | LOC667418    | 2,6497324  | 0,00426306 | 0,00795882 |
| NM_00103795 | chr7  | 27888242  | 27896054  | Dyrk1b       | 2,64771285 | 0,00114312 | 0,00359266 |
| NM_028964   | chr16 | 11319225  | 11669050  | 4933437K13R  | 2,64584155 | 0,00081562 | 0,00297684 |
| NM_134257   | chr4  | 62106049  | 62188696  | Rgs3         | 2,6439227  | 0,00674473 | 0,01096593 |
| NM_008662   | chr9  | 79950788  | 80095075  | N/A          | 2,64306762 | 0,0016231  | 0,00435898 |
| NM_133697   | chr5  | 65728938  | 65771965  | 1110003E01R  | 2,63843053 | 0,0023062  | 0,00529984 |
| BC072664    | chr7  | 66137698  | 66267240  | Lrrk1        | 2,63689477 | 0,00128476 | 0,00383096 |
| AK166285    | chr13 | 78172265  | 78628328  | 1110033M05R  | 2,63590797 | 0,00052076 | 0,00236826 |
| NM_181585   | chr4  | 115719845 | 115800988 | Pik3r3       | 2,63419108 | 0,00174721 | 0,00452424 |
| NM_011123   | chrX  | 132169199 | 132184107 | Plp1         | 2,63384419 | 0,00027688 | 0,00178148 |
| NM_178608   | chr6  | 71637368  | 71740211  | Reep1        | 2,63377725 | 0,00501709 | 0,00892626 |
| AK029709    | chr12 | 71790129  | 71818611  | Frmtd6       | 2,63261521 | 0,00016885 | 0,00143675 |
| NM_00100278 | chr9  | 42359852  | 42364062  | 9530085L02Ri | 2,63192796 | 0,0015016  | 0,00416398 |
| NM_026167   | chrX  | 22376229  | 22522012  | Klhl13       | 2,62947844 | 0,00358747 | 0,00705891 |
| NM_029100   | chr4  | 133809970 | 133814432 | Sepn1        | 2,62684911 | 0,00076856 | 0,00288913 |
| BC087615    | chr17 | 34200547  | 34204234  | Pbx2         | 2,62599955 | 0,00066695 | 0,0026795  |
| XM_894241   | chr7  | 44178305  | 44225515  | Shank1       | 2,62509567 | 0,00030639 | 0,00186288 |
| BC058274    | chr5  | 102073257 | 102075038 | Wdfy3        | 2,62507141 | 0,00274325 | 0,00591724 |
| AY212511    | chr2  | 165355992 | 165462320 | Eya2         | 2,62464688 | 0,00580516 | 0,00262691 |
| AK147493    | chr5  | 93973264  | 94040512  | Shrm         | 2,62319187 | 2,13E-05   | 0,00069344 |
| AF141934    | chr5  | 90102732  | 90309422  | Slc4a4       | 2,6220345  | 0,01191066 | 0,01695591 |
| NM_177816   | chr14 | 39724580  | 39801678  | Sh2d4b       | 2,62076864 | 0,00145485 | 0,00408948 |
| NM_028934   | chr14 | 7224977   | 7460026   | 4930452B06R  | 2,61968497 | 0,00043544 | 0,00808004 |
| NM_139309   | chr4  | 53735281  | 53784371  | Fcmd         | 2,61938235 | 0,00045962 | 0,00226656 |
| BC100559    | chr17 | 29732247  | 29935417  | Zfand3       | 2,61822062 | 0,00023009 | 0,00164678 |
| BC057202    | chr10 | 94006217  | 94018585  | Tmcc3        | 2,61574759 | 0,01045884 | 0,01529448 |
| XM_897830   | chr4  | 128291624 | 128308416 | BC039093     | 2,61571133 | 0,00065787 | 0,00266798 |
| BC008272    | chr5  | 38425441  | 38447690  | Nsg1         | 2,6145331  | 0,00191906 | 0,00479599 |
| NM_017380   | chr11 | 117147809 | 117178397 | sept-09      | 2,61404987 | 0,00020822 | 0,00156644 |
| BC087623    | chr18 | 15112416  | 15204815  | Kctd1        | 2,61320445 | 0,00348137 | 0,00690254 |

|             |       |           |           |              |            |            |            |
|-------------|-------|-----------|-----------|--------------|------------|------------|------------|
| NM_177561   | chr5  | 74281733  | 74350108  | Usp46        | 2,61319237 | 0,00281739 | 0,00601407 |
| AK045330    | chr5  | 108909612 | 108924854 | Idua         | 2,61269732 | 0,00151856 | 0,00418958 |
| BC043702    | chr17 | 47330965  | 47387597  | Foxp4        | 2,61260678 | 0,00078667 | 0,00292695 |
| AY007793    | chr6  | 17644031  | 17892965  | St7          | 2,61248001 | 0,00136176 | 0,00396237 |
| AK053714    | chr18 | 61856307  | 61912029  | AI173486     | 2,61195493 | 0,00153003 | 0,00420209 |
| BC046304    | chr7  | 111907202 | 111949600 | Dkk3         | 2,61175578 | 0,00043215 | 0,00219089 |
| AK043876    | chr17 | 66915429  | 66924337  | N/A          | 2,61050092 | 0,00282711 | 0,00602834 |
| AK051411    | chr5  | 5137881   | 5386199   | Pftk1        | 2,60908992 | 0,0102952  | 0,01512195 |
| BC052083    | chr5  | 34812943  | 34830820  | Tnip2        | 2,60609559 | 3,32E-05   | 0,00083399 |
| BC100393    | chrX  | 22376244  | 22518635  | Klhl13       | 2,60607752 | 0,00757124 | 0,01192911 |
| NM_00103795 | chr17 | 63581483  | 63824640  | Fert2        | 2,60503604 | 0,00037285 | 0,00204961 |
| BC108418    | chr6  | 17699225  | 17893020  | St7          | 2,60441617 | 0,00577106 | 0,00978308 |
| XM_150227   | chr9  | 100956679 | 100964191 | Msl2l1       | 2,604001   | 4,76E-05   | 0,000929   |
| NM_019464   | chr3  | 144626229 | 144657709 | Sh3glb1      | 2,60268371 | 9,63E-06   | 0,00055409 |
| AK014794    | chr14 | 19271420  | 19285233  | Zmynd17      | 2,60250933 | 0,00799633 | 0,01242807 |
| BC090615    | chr9  | 60510994  | 60536540  | Larp6        | 2,60236502 | 0,00715803 | 0,01141808 |
| NM_021507   | chr2  | 122473439 | 122500994 | Sqrdl        | 2,60039959 | 0,01174433 | 0,01675914 |
| NM_153117   | chr11 | 52239850  | 52252146  | 9530068E07R  | 2,60021335 | 0,00042112 | 0,00215143 |
| BC026856    | chr2  | 6462109   | 6802219   | Cugbp2       | 2,59954056 | 0,0105639  | 0,01541031 |
| AK028683    | chr1  | 67107574  | 67164467  | Ppp1r13b     | 2,59906011 | 0,00190656 | 0,004773   |
| NM_175451   | chr10 | 83956103  | 83963687  | Ckap4        | 2,59897604 | 0,00071735 | 0,00278211 |
| NM_177226   | chr7  | 127398182 | 127405581 | Zfp629       | 2,59607729 | 0,00246958 | 0,00554329 |
| BC100449    | chr5  | 14939655  | 15168842  | N/A          | 2,59544155 | 0,01171103 | 0,01672363 |
| NM_00103895 | chr4  | 44147309  | 44189439  | Rnf38        | 2,59374503 | 0,0013923  | 0,0040043  |
| AK051624    | chr19 | 31808110  | 31830970  | Prkg1        | 2,59155258 | 0,00015454 | 0,00139921 |
| NM_027993   | chr4  | 41707599  | 41758180  | 2310028H24R  | 2,5910317  | 0,00627461 | 0,01040139 |
| NM_009726   | chrX  | 102230035 | 102327636 | Atp7a        | 2,59022963 | 6,23E-06   | 0,00053609 |
| NM_011625   | chr12 | 112276265 | 112355863 | Ppp1r13b     | 2,58903895 | 0,00043575 | 0,00220536 |
| BC107288    | chr9  | 13180638  | 13181048  | Phxr4        | 2,58888894 | 0,00150868 | 0,0041797  |
| XM_977344   | chr18 | 10325174  | 10502410  | AK220484     | 2,58673692 | 0,0051485  | 0,00907877 |
| NM_015814   | chr7  | 111907199 | 111950238 | Dkk3         | 2,58668911 | 0,01011033 | 0,01489945 |
| XM_898101   | chrX  | 108717469 | 108743017 | Zfp711       | 2,58493261 | 0,01275578 | 0,01794478 |
| BC067052    | chr3  | 134174206 | 134195618 | Cxxc4        | 2,58479524 | 0,00712877 | 0,01137626 |
| XM_893600   | chr2  | 149873195 | 149932514 | LOC245174    | 2,58444888 | 0,00353147 | 0,00697636 |
| AK151094    | chr4  | 43467561  | 43475727  | N/A          | 2,58342798 | 0,01255401 | 0,01769433 |
| NM_177322   | chr13 | 30343921  | 30390332  | Agg1a        | 2,58201969 | 0,00334821 | 0,00673256 |
| NM_025377   | chr11 | 86925455  | 86939169  | 1110001A07R  | 2,58183476 | 0,00181874 | 0,00464535 |
| NM_183143   | chr7  | 81367787  | 81371794  | BC048679     | 2,58145897 | 0,00655015 | 0,01072563 |
| BC048813    | chr17 | 86871627  | 86907327  | Rhoq         | 2,58110709 | 0,00024518 | 0,00169574 |
| BC024458    | chr3  | 106675927 | 106702519 | Tmem77       | 2,58101764 | 0,0003559  | 0,00199989 |
| NM_054052   | chr16 | 19673796  | 19685863  | B3gnt5       | 2,58039752 | 0,0065201  | 0,01069111 |
| BC040823    | chr2  | 179954394 | 179964867 | Lsm14b       | 2,58036175 | 0,00308675 | 0,00637893 |
| AB061524    | chr17 | 43416307  | 43502567  | Dscr11       | 2,57990868 | 0,00364556 | 0,00713552 |
| NM_080708   | chr5  | 97237990  | 97331350  | Bmp2k        | 2,57970602 | 0,00091982 | 0,00317358 |
| NM_009238   | chr13 | 28958180  | 28961147  | Sox4         | 2,57909813 | 0,00178932 | 0,00459297 |
| NM_019410   | chr3  | 57929823  | 57935466  | Pfn2         | 2,57847847 | 0,00024651 | 0,00169777 |
| NM_015731   | chr2  | 168325642 | 168433005 | Atp9a        | 2,57726937 | 0,00142113 | 0,00404816 |
| BC025914    | chr1  | 137255258 | 137257223 | Nav1         | 2,57697761 | 0,00145316 | 0,00408668 |
| BC039162    | chr5  | 134774013 | 134837001 | Cyln2        | 2,57585253 | 0,00079444 | 0,00293825 |
| NM_00104045 | chrX  | 5575620   | 5809191   | D430043L16R  | 2,5750849  | 0,00046177 | 0,00227151 |
| BC107009    | chr6  | 88164400  | 88171875  | Gata2        | 2,57495401 | 0,00067556 | 0,00269873 |
| NM_026988   | chr6  | 124879299 | 124883550 | 2610009E16R  | 2,57422234 | 0,00175002 | 0,00452537 |
| AB086123    | chr14 | 28871075  | 29182018  | Cacna1d      | 2,57397255 | 0,00090559 | 0,00314634 |
| NM_010098   | chr1  | 177499101 | 177529265 | Opn3         | 2,57290229 | 0,00795468 | 0,01238272 |
| AK160861    | chr2  | 6463610   | 7314051   | Cugbp2       | 2,57278934 | 0,00033046 | 0,00193517 |
| NM_080595   | chr11 | 5006268   | 5052225   | Emid1        | 2,57261696 | 0,00232585 | 0,00532806 |
| AK159031    | chr16 | 34071841  | 34182712  | Kalrn        | 2,57041268 | 0,0073751  | 0,01167871 |
| NM_027870   | chrX  | 130102960 | 130107820 | Armcx3       | 2,56992573 | 0,00577424 | 0,00978567 |
| BC014296    | chr6  | 134886122 | 134890000 | Cdkn1b       | 2,56851293 | 0,00461785 | 0,00841174 |
| BC018542    | chr6  | 4579999   | 4593018   | Casd1        | 2,5676407  | 0,00067297 | 0,00269458 |
| AB125594    | chr2  | 20427800  | 20728278  | BC026657     | 2,56729664 | 0,00822335 | 0,01266536 |
| XM_146632   | chr9  | 8956169   | 9200943   | 9030420J04Ri | 2,56536955 | 0,00169903 | 0,00447225 |
| NM_009233   | chr8  | 12396332  | 12397508  | Sox1         | 2,56514433 | 0,00469624 | 0,00852328 |
| NM_173437   | chr1  | 137255283 | 137402120 | Nav1         | 2,56103446 | 0,0017244  | 0,00449732 |
| NM_013565   | chr11 | 94860571  | 94892804  | Itga3        | 2,56049605 | 0,00103909 | 0,00340356 |
| AK122415    | chr11 | 117082541 | 117178400 | sept-09      | 2,55922443 | 0,00014507 | 0,00136077 |
| BC010287    | chr17 | 34200333  | 34204599  | Pbx2         | 2,55862728 | 7,59E-05   | 0,00108714 |
| BC055888    | chr1  | 175799243 | 175868385 | Ifi202b      | 2,55851496 | 0,00978224 | 0,01450789 |
| NM_007654   | chr4  | 43468834  | 43475663  | Cd72         | 2,5581603  | 0,00250229 | 0,00559379 |
| NM_011877   | chr12 | 99077791  | 99135644  | Ptpn21       | 2,55603927 | 0,00066666 | 0,0026795  |
| BC060030    | chr7  | 79968361  | 79988851  | Idh2         | 2,55517128 | 0,00038346 | 0,00205599 |
| XM_485667   | chr5  | 111658468 | 111697328 | Mn1          | 2,55343028 | 0,00404883 | 0,00771311 |
| AK161676    | chr9  | 66315232  | 66391042  | Usp3         | 2,55052339 | 6,48E-05   | 0,00102744 |
| NM_028922   | chr19 | 29029916  | 29032791  | Ppapdc2      | 2,55024055 | 0,00526178 | 0,00921313 |
| BC100415    | chrX  | 131547320 | 131550240 | Tceal5       | 2,54963396 | 0,00790246 | 0,01233585 |
| NM_009295   | chr2  | 32609970  | 32669135  | Stxbp1       | 2,54910948 | 0,0017202  | 0,00449618 |

|             |       |           |           |              |            |            |            |
|-------------|-------|-----------|-----------|--------------|------------|------------|------------|
| AK152628    | chr2  | 6462112   | 6638887   | Cugbp2       | 2,54899168 | 0,00110775 | 0,0035249  |
| BC011149    | chr18 | 20830928  | 20888637  | B4galt6      | 2,54856768 | 0,00158594 | 0,00429399 |
| NM_011214   | chr4  | 131040532 | 131110354 | Ptpru        | 2,54836748 | 0,00016169 | 0,00142469 |
| NM_009931   | chr8  | 11198402  | 11312702  | Col4a1       | 2,54830272 | 0,00430274 | 0,00801154 |
| AK144191    | chr4  | 43468834  | 43475726  | Cd72         | 2,54716662 | 0,0078363  | 0,01226248 |
| AK004618    | chr1  | 167166364 | 167296962 | Iqwd1        | 2,54681941 | 0,00097371 | 0,00330595 |
| XM_130388   | chr2  | 132378371 | 132442675 | 1110034G24R  | 2,54107684 | 0,00901217 | 0,01356489 |
| AY259046    | chr15 | 100406280 | 100423068 | Pou6f1       | 2,54043696 | 0,00013698 | 0,00133239 |
| XM_193558   | chr10 | 31191300  | 31300328  | Ibrdc1       | 2,53831304 | 0,00109198 | 0,00349269 |
| AK011702    | chr15 | 93112460  | 93165115  | Yaf2         | 2,53789667 | 0,00176775 | 0,00456051 |
| NM_029781   | chr10 | 74480804  | 74497816  | Rab36        | 2,53711691 | 0,00037708 | 0,00204961 |
| NM_008000   | chr17 | 63623200  | 63824374  | Fert2        | 2,53586861 | 8,32E-05   | 0,00112072 |
| NM_011766   | chr15 | 40485115  | 40934666  | Zfpm2        | 2,53534721 | 0,01367652 | 0,01897589 |
| NM_177333   | chr13 | 74635806  | 74674702  | Exoc3        | 2,53490205 | 0,00097274 | 0,0033056  |
| NM_016886   | chrX  | 37646140  | 37923227  | Gria3        | 2,53400025 | 0,00571279 | 0,00973411 |
| NM_011891   | chr11 | 46822205  | 47222725  | Sgcd         | 2,53349679 | 0,0129061  | 0,01811777 |
| U51279      | chr2  | 152519567 | 152521948 | Bcl2l1       | 2,53233219 | 0,00068046 | 0,00271362 |
| BC062116    | chr7  | 5987351   | 5999220   | Zfp28        | 2,53077047 | 0,00209437 | 0,00500841 |
| AK037006    | chr1  | 170262018 | 170268807 | Pbx1         | 2,53030273 | 0,00041073 | 0,00212047 |
| NM_011571   | chr4  | 43463038  | 43463038  | Testk1       | 2,52982338 | 0,00291811 | 0,0016963  |
| AK038242    | chr3  | 60617477  | 60706976  | Mbnl1        | 2,52944932 | 0,00659666 | 0,01078696 |
| AK140217    | chr5  | 34039860  | 34049647  | Fgfr3        | 2,52867215 | 0,00201489 | 0,00492327 |
| XM_193868   | chr17 | 29554969  | 29614894  | Lodga1       | 2,5253558  | 0,01015526 | 0,01495323 |
| XM_972947   | chr5  | 26387892  | 26389342  | MC664804     | 2,52534997 | 0,00804982 | 0,01248517 |
| AK166404    | chr16 | 84856059  | 84862486  | N/A          | 2,52403165 | 0,00390181 | 0,00752105 |
| AK006365    | chr17 | 27794340  | 27795478  | Tcp11        | 2,5238567  | 0,00837956 | 0,01281803 |
| NM_030889   | chr5  | 36334091  | 36715203  | Sorcs2       | 2,52263824 | 0,0054251  | 0,00940793 |
| BC008159    | chr1  | 194197435 | 194471937 | Hhat         | 2,52097184 | 0,00013518 | 0,0013321  |
| NM_029553   | chr12 | 99321638  | 99384282  | Ttc8         | 2,52027297 | 0,00153586 | 0,00421167 |
| AF005936    | chr17 | 44070585  | 44277636  | Runx2        | 2,5192134  | 0,00329904 | 0,00667194 |
| BC056392    | chr5  | 116703491 | 116852806 | 1500001A10R  | 2,51876525 | 0,00330268 | 0,00667477 |
| BC053387    | chr1  | 13126502  | 13357653  | Ncoa2        | 2,51835209 | 5,83E-06   | 0,00053609 |
| BC099395    | chr2  | 179957320 | 179964867 | Lsm14b       | 2,51814845 | 0,0043365  | 0,00805427 |
| NM_175473   | chr5  | 96614256  | 97025030  | Fras1        | 2,51675248 | 0,01007571 | 0,01486915 |
| AK144675    | chr2  | 27499209  | 27584941  | Rxra         | 2,51656641 | 0,00711145 | 0,01135774 |
| BC020143    | chr11 | 69662876  | 69667235  | Plscr3       | 2,51605478 | 0,00171289 | 0,00449545 |
| AK166161    | chr4  | 137488702 | 137515233 | Hp1bp3       | 2,5158862  | 0,00091232 | 0,00315503 |
| AK006055    | chr9  | 57051746  | 57060684  | 1700017B05R  | 2,51561301 | 0,00026406 | 0,00174734 |
| NM_025891   | chr5  | 24102686  | 24112067  | Smardc3      | 2,51324271 | 0,00278339 | 0,00597572 |
| NM_028810   | chr2  | 50952447  | 50971120  | Rnd3         | 2,51176821 | 0,01378986 | 0,01911092 |
| BC058516    | chr2  | 181116711 | 181117907 | 2700038C09R  | 2,51163473 | 0,00868647 | 0,0131845  |
| NM_011144   | chr15 | 85563541  | 85630585  | Ppara        | 2,51034677 | 0,00054156 | 0,00240593 |
| XM_901424   | chr11 | 16834711  | 16851121  | 2810442I21Ri | 2,50730934 | 0,00560717 | 0,00962389 |
| AK146512    | chr16 | 13327679  | 13331106  | N/A          | 2,50569358 | 0,00343632 | 0,00683823 |
| AK040372    | chr14 | 68389914  | 68393741  | N/A          | 2,5051205  | 0,00047936 | 0,00230991 |
| AK032809    | chr14 | 47368332  | 47434873  | 6720456H20R  | 2,50476167 | 0,00143388 | 0,00405733 |
| AK151818    | chr2  | 6463532   | 6638887   | Cugbp2       | 2,5043971  | 0,00124036 | 0,00374691 |
| BC072661    | chr7  | 6310755   | 6334493   | Peg3         | 2,50282369 | 0,00018463 | 0,00148753 |
| AK159040    | chr15 | 64116126  | 64118420  | 9130004J05Ri | 2,50222236 | 0,00262081 | 0,00577643 |
| BC080850    | chr11 | 78289486  | 78313949  | A830091I15Ri | 2,50102013 | 0,00526461 | 0,00921539 |
| NM_007412   | chr10 | 127152570 | 127154642 | Admr         | 2,50091034 | 0,00184239 | 0,00467815 |
| BC094289    | chr9  | 118775548 | 118889532 | Ctdspl       | 2,49925828 | 0,00141389 | 0,00404103 |
| NM_153550   | chr16 | 35614649  | 35689103  | Dir2c        | 2,49869244 | 0,00622495 | 0,0103408  |
| XM_972907   | chr9  | 3532778   | 3897342   | Gucy1a2      | 2,49817291 | 0,00530404 | 0,00926536 |
| BC094349    | chr7  | 34909641  | 34911984  | Lrp3         | 2,4980113  | 0,00185864 | 0,00469343 |
| NM_023132   | chrX  | 70174841  | 70183538  | Renbp        | 2,49789587 | 0,00064939 | 0,0026518  |
| BC056384    | chr2  | 18599564  | 18604383  | Bmi1         | 2,49599204 | 0,01250933 | 0,01765222 |
| NM_011759   | chr15 | 75443976  | 75452548  | Zfp41        | 2,49493691 | 0,00467844 | 0,00849873 |
| AK137292    | chr2  | 6462523   | 6998514   | Cugbp2       | 2,49455648 | 0,00136903 | 0,00397187 |
| NM_029586   | chr11 | 108498707 | 108676444 | Ccdc46       | 2,49407814 | 0,00576131 | 0,00977489 |
| BC060958    | chr7  | 50467231  | 50468550  | 4933405O20R  | 2,49381308 | 0,00922681 | 0,01382515 |
| AK147547    | chr5  | 67247550  | 67336294  | 3732412D22R  | 2,49264368 | 0,01035737 | 0,01518334 |
| AF026565    | chrX  | 165172263 | 165337021 | Mid1         | 2,49217147 | 0,00054567 | 0,00241342 |
| BC006938    | chr1  | 163805931 | 163808302 | Pigc         | 2,49120429 | 0,00397994 | 0,007642   |
| NM_033602   | chr14 | 47042890  | 47178775  | Peli2        | 2,49020296 | 0,00109023 | 0,00348896 |
| BC019378    | chr18 | 3507972   | 3512751   | Bambi        | 2,48979449 | 0,00061415 | 0,00256359 |
| NM_153407   | chr15 | 100307603 | 100323273 | BC035295     | 2,48808079 | 0,00510674 | 0,00903453 |
| AK146525    | chr13 | 64171117  | 64195757  | Habp4        | 2,48766692 | 0,00017676 | 0,00146166 |
| NM_00100436 | chr17 | 27870114  | 27898934  | Scube3       | 2,48717841 | 0,00197349 | 0,00487809 |
| BC063076    | chr16 | 19673960  | 19686018  | B3gnt5       | 2,48574218 | 0,00974449 | 0,0144591  |
| NM_007488   | chr7  | 84122462  | 84286144  | Arnt2        | 2,48521385 | 0,00449174 | 0,00824564 |
| XM_357863   | chr8  | 10986932  | 11008402  | Irs2         | 2,48277467 | 0,00179642 | 0,0046053  |
| NM_00102445 | chr5  | 34918178  | 34949165  | Add1         | 2,48240757 | 0,00072138 | 0,00278211 |
| NM_008835   | chr9  | 13180533  | 13181924  | Phxr4        | 2,4823961  | 0,00280241 | 0,00599711 |
| NM_207636   | chr14 | 71273032  | 71445085  | Fndc3a       | 2,48165632 | 0,00649681 | 0,01066464 |
| U71091      | chrX  | 102230040 | 102327466 | Atp7a        | 2,47994249 | 0,00013664 | 0,00133239 |

|             |       |           |           |                |            |            |            |
|-------------|-------|-----------|-----------|----------------|------------|------------|------------|
| BC082320    | chrX  | 97617652  | 97623404  | Zmym3          | 2,47979925 | 0,00389316 | 0,0075068  |
| NM_010795   | chr15 | 80001065  | 80042774  | Mgat3          | 2,47965602 | 0,00122331 | 0,00373063 |
| NM_053100   | chr19 | 46555609  | 46569672  | Trim8          | 2,4790717  | 0,00335242 | 0,00673647 |
| NM_133167   | chr15 | 84059808  | 84143375  | Parvb          | 2,4783373  | 0,00033548 | 0,00194375 |
| AK151550    | chr6  | 17699215  | 17893020  | St7            | 2,47784052 | 0,00365371 | 0,00714913 |
| NM_027482   | chr3  | 127862562 | 127888312 | 5730508B09R    | 2,47630669 | 0,00863282 | 0,01312673 |
| NM_026131   | chr13 | 55516394  | 55523056  | Pdlim7         | 2,47614077 | 0,00100862 | 0,00336247 |
| NM_178253   | chr12 | 70160436  | 70202566  | Klhdc1         | 2,47545433 | 0,00064931 | 0,0026518  |
| AK031688    | chr19 | 44984461  | 45035186  | 6030443O07R    | 2,47529419 | 0,00204494 | 0,0049601  |
| XM_488385   | chrX  | 137877059 | 137879668 | LOC436235      | 2,47298473 | 0,00148822 | 0,00414227 |
| AK163138    | chr1  | 37778816  | 37809619  | Tsga10         | 2,46957024 | 0,00456081 | 0,00832564 |
| XM_127051   | chr12 | 70502365  | 70604506  | Sos2           | 2,46662774 | 0,01092766 | 0,01585947 |
| NM_080857   | chr13 | 3633323   | 3651020   | Asb13          | 2,46640548 | 0,00664659 | 0,0108492  |
| BC103611    | chr13 | 51443536  | 51579580  | Shc3           | 2,46481608 | 0,00565153 | 0,00967953 |
| NM_146191   | chr7  | 66137694  | 66267291  | Lrrk1          | 2,46449149 | 0,00791575 | 0,01234791 |
| BC052698    | chr13 | 55516395  | 55523039  | Pdlim7         | 2,4642068  | 0,00140448 | 0,00202572 |
| BC065137    | chr15 | 32291852  | 32635130  | Sema5a         | 2,46407585 | 0,00964796 | 0,01435158 |
| NM_008079   | chr12 | 98603349  | 98660387  | Galc           | 2,46393352 | 0,00327703 | 0,00664354 |
| AB200281    | chr6  | 4624418   | 4697019   | Sgce           | 2,46371151 | 0,0020429  | 0,00495716 |
| AY015062    | chr14 | 56676299  | 56688410  | Lats2          | 2,46272124 | 0,00201226 | 0,00292216 |
| NM_008915   | chr14 | 68952977  | 69024529  | Ppp3cc         | 2,46144699 | 0,00019261 | 0,00150596 |
| BC053388    | chr9  | 13370385  | 13372713  | LOC434369      | 2,46048604 | 0,00104642 | 0,00340917 |
| BC107388    | chr11 | 74203659  | 74241466  | Garnl4         | 2,4604292  | 0,00037945 | 0,0020498  |
| BC009155    | chr6  | 138111857 | 138120948 | Mgst1          | 2,46042351 | 0,00246069 | 0,00553315 |
| NM_026145   | chr5  | 114624572 | 114641470 | Kctd10         | 2,46020181 | 0,00110561 | 0,00352118 |
| NM_028007   | chr8  | 88608644  | 88730877  | Itfg1          | 2,45928682 | 0,00302286 | 0,00630196 |
| NM_177994   | chr10 | 79313180  | 79320040  | C030046I01Ri   | 2,45798595 | 0,0054312  | 0,00941303 |
| NM_013792   | chr11 | 100886214 | 100893742 | Naglu          | 2,45653819 | 0,00021393 | 0,00158443 |
| XM_00100471 | chr2  | 145366954 | 145384910 | LOC433482      | 2,45627144 | 0,00363578 | 0,00712628 |
| NM_146128   | chr2  | 156392119 | 156455804 | Dlgap4         | 2,45555647 | 0,00196364 | 0,00486383 |
| BC094565    | chr4  | 45055351  | 45083530  | Fbxo10         | 2,45530117 | 0,00033442 | 0,0019437  |
| BC100428    | chr1  | 177800392 | 178050360 | Pld5           | 2,45329944 | 0,00071794 | 0,00278211 |
| AY701871    | chr9  | 57034717  | 57047972  | Trcg1          | 2,452608   | 0,00595287 | 0,01000494 |
| NM_028357   | chr3  | 66144563  | 66224367  | Veph1          | 2,45149757 | 0,00614271 | 0,01023557 |
| NM_00101338 | chr11 | 94355887  | 94365289  | Rsad1          | 2,4512427  | 0,01029833 | 0,01512282 |
| NM_178149   | chr11 | 3230809   | 3242974   | 1500004A08R    | 2,44981589 | 0,00056528 | 0,00245281 |
| AK014824    | chr10 | 112329544 | 112333031 | 4921506J03Ri   | 2,44855964 | 0,0000692  | 0,00274496 |
| BC050253    | chr15 | 102982886 | 102996016 | Smug1          | 2,4467556  | 0,00192292 | 0,00479886 |
| AK054558    | chr5  | 34890719  | 34949162  | Add1           | 2,446456   | 0,00078575 | 0,00292608 |
| XM_00100273 | chr12 | 108870622 | 108987383 | Em11           | 2,44638817 | 0,00203964 | 0,00495532 |
| NM_020006   | chr11 | 113542939 | 113567408 | Cdc42ep4       | 2,44297652 | 0,004187   | 0,0078549  |
| BC016135    | chr9  | 75092262  | 75131384  | Gnb5           | 2,44293137 | 0,00013575 | 0,0013321  |
| BC024346    | chr16 | 4531702   | 4540154   | Magmas         | 2,44245164 | 4,83E-05   | 0,00093602 |
| NM_172154   | chr19 | 41602949  | 41613092  | A630025C20R    | 2,44116532 | 0,00116245 | 0,00362287 |
| NM_009743   | chr2  | 152472108 | 152523123 | Bcl2l1         | 2,44071414 | 0,00155664 | 0,00424357 |
| NM_00101233 | chr2  | 91730659  | 91732538  | Mdk            | 2,43764832 | 0,0001808  | 0,00147255 |
| BC003766    | chr8  | 87598753  | 87690165  | Nfix           | 2,4375582  | 0,00504936 | 0,00895694 |
| NM_011360   | chr6  | 4624349   | 4697099   | Sgce           | 2,43673045 | 0,00037855 | 0,00204961 |
| NM_009811   | chr3  | 129893485 | 129905973 | Casp6          | 2,43472697 | 0,00286522 | 0,00608349 |
| BC087932    | chr16 | 10974522  | 10986561  | Snn            | 2,43472135 | 0,00652773 | 0,01069479 |
| AK029878    | chr17 | 88534934  | 88570912  | 4921524J06Ri   | 2,43419824 | 0,00137604 | 0,00397927 |
| XM_129727   | chr1  | 57322171  | 57328503  | 1700066M21R    | 2,43397891 | 0,00483774 | 0,00870063 |
| AK147513    | chr6  | 115920431 | 115960624 | Pldnd1         | 2,43378771 | 0,00035316 | 0,00199391 |
| BC096441    | chr11 | 69499243  | 69512005  | Tnfsf12-tnfsf1 | 2,4334391  | 0,00084056 | 0,00300624 |
| NM_153118   | chr3  | 122530745 | 122560788 | Fnbpl1         | 2,431708   | 0,00037957 | 0,0020498  |
| NM_026880   | chr4  | 137585487 | 137598347 | Pink1          | 2,43038803 | 0,00022239 | 0,0016209  |
| NM_022332   | chr6  | 17699228  | 17892966  | St7            | 2,42466707 | 0,00187749 | 0,00472304 |
| NM_144814   | chr1  | 193800993 | 193838511 | Rcor3          | 2,42428616 | 5,86E-05   | 0,00101087 |
| NM_009707   | chrX  | 164139203 | 164648540 | Arhgap6        | 2,42407892 | 0,00046519 | 0,00227893 |
| BC015264    | chr8  | 113843951 | 113858547 | St3gal2        | 2,42297581 | 0,00027703 | 0,00178148 |
| NM_053140   | chr18 | 37599519  | 37602314  | Pcdhb15        | 2,42273509 | 0,01090685 | 0,01583313 |
| AK122267    | chr9  | 42719316  | 42856713  | Arhgef12       | 2,42244963 | 0,00110266 | 0,00351742 |
| NM_133741   | chr9  | 121980599 | 122018397 | Snrk           | 2,42073194 | 0,00188124 | 0,00473049 |
| NM_144937   | chr9  | 66315886  | 66390986  | Usp3           | 2,42046908 | 0,00028346 | 0,00180553 |
| NM_023047   | chr5  | 30988475  | 31075950  | Dpysl5         | 2,41964713 | 0,00256253 | 0,00568603 |
| AB200282    | chr6  | 4624418   | 4697019   | Sgce           | 2,41902107 | 0,00062758 | 0,00260219 |
| AY515727    | chr12 | 70933351  | 71021438  | Nin            | 2,41822195 | 0,00663623 | 0,01083681 |
| AK122464    | chr12 | 79948033  | 80000486  | Plekhh1        | 2,4180711  | 0,0025864  | 0,0057243  |
| NM_1010169  | chr13 | 96702487  | 96719132  | F2r            | 2,41783646 | 0,00029745 | 0,00183867 |
| AK147274    | chr15 | 78936187  | 78964153  | N/A            | 2,41693164 | 0,00825638 | 0,01269001 |
| XM_897584   | chrX  | 45715076  | 45741392  | 1100001E04R    | 2,41654635 | 0,00513282 | 0,00906722 |
| NM_00103325 | chr2  | 25183500  | 25187635  | Uap111         | 2,41642352 | 0,00065684 | 0,00266582 |
| NM_028760   | chr19 | 38120232  | 38139565  | Cep55          | 2,41636769 | 0,00358879 | 0,00705917 |
| AB117975    | chr6  | 4624508   | 4697037   | Sgce           | 2,41559736 | 0,00030256 | 0,00185674 |
| AK122458    | chr1  | 137255258 | 137423706 | Nav1           | 2,41424708 | 0,00287058 | 0,00609271 |
| NM_027885   | chr15 | 102981323 | 102991318 | Smug1          | 2,41398493 | 0,00146927 | 0,00411347 |

|            |              |           |           |             |            |            |            |
|------------|--------------|-----------|-----------|-------------|------------|------------|------------|
| BC052407   | chr17        | 47330965  | 47387626  | Foxp4       | 2,41395146 | 0,00315005 | 0,00646269 |
| NM_177687  | chr6         | 134795891 | 134823576 | Crebl2      | 2,41319863 | 0,00027353 | 0,00177065 |
| NM_145942  | chr13_random | 114526    | 132323    | Hmgcs1      | 2,41308712 | 0,0003838  | 0,00205599 |
| BC058614   | chr17        | 66666027  | 67259402  | Ptprm       | 2,41027317 | 0,0009882  | 0,0032851  |
| NM_178589  | chr17        | 42480038  | 42552546  | Tnfrsf21    | 2,40952706 | 0,00647559 | 0,01063859 |
| NM_020510  | chr11        | 102420624 | 102422672 | Fzd2        | 2,40888691 | 0,00242681 | 0,0054764  |
| AK143175   | chr17        | 42480051  | 42502215  | Tnfrsf21    | 2,40816348 | 0,00304243 | 0,00632461 |
| AK169425   | chr11        | 53410819  | 53444525  | Kif3a       | 2,40678955 | 0,00151414 | 0,00418438 |
| NM_138654  | chr13        | 16642613  | 17479881  | AF397014    | 2,40640588 | 0,01341955 | 0,01870642 |
| NM_007722  | chr1         | 92035173  | 92047459  | Cmkor1      | 2,40563873 | 0,00530124 | 0,00926319 |
| BC026739   | chr5         | 65435204  | 65447275  | Klhl5       | 2,40554424 | 0,00053647 | 0,00240124 |
| BC108366   | chrX         | 97617652  | 97622560  | Zmym3       | 2,40512743 | 0,00113964 | 0,00358363 |
| AK160317   | chr11        | 108241366 | 108288883 | N/A         | 2,40387187 | 0,00212631 | 0,00502188 |
| NM_177377  | chr4         | 43448117  | 43450234  | 4833436C18R | 2,40286123 | 0,00332103 | 0,00670049 |
| NM_197990  | chr1         | 153654802 | 153852317 | 1700025G04R | 2,40277796 | 0,00020356 | 0,00154011 |
| AK145449   | chr1         | 134245153 | 134294454 | Ripk3a      | 2,40248374 | 0,00166654 | 0,00418438 |
| BC048677   | chr11        | 108498726 | 108676439 | Ccdc46      | 2,40191761 | 0,00276975 | 0,00595107 |
| BC020036   | chr11        | 3795249   | 3799318   | Dusp18      | 2,4014182  | 0,00118896 | 0,00366904 |
| BC099699   | chr4         | 43463376  | 43468873  | Tesk1       | 2,40133498 | 0,0021277  | 0,00502188 |
| NM_0111676 | chr11        | 78159716  | 78165351  | Unc119      | 2,40054725 | 0,00181134 | 0,00463286 |
| AK005164   | chr11        | 75837446  | 75843977  | 1500005K14R | 2,40003149 | 0,00222898 | 0,00518298 |
| AK144924   | chr4         | 22022160  | 22085193  | 6230409E13R | 2,39981523 | 0,00889188 | 0,01342452 |
| BC068206   | chr4         | 46562425  | 46563902  | Coro2a      | 2,39952692 | 0,00013932 | 0,00134116 |
| BC011164   | chr11        | 74724733  | 74741859  | Srr         | 2,39882847 | 0,00091487 | 0,00316017 |
| NM_134000  | chr10        | 39302349  | 39344723  | Traf3ip2    | 2,39837403 | 0,00087693 | 0,00308999 |
| BC028539   | chr11        | 6328144   | 6344355   | H2afv       | 2,39645193 | 0,00368045 | 0,00718965 |
| BC017130   | chr17        | 93090939  | 93121166  | Pja2        | 2,39620278 | 0,00033404 | 0,0019437  |
| XM_483898  | chr10        | 53163178  | 53165480  | LOC432460   | 2,39514556 | 0,00939512 | 0,01403148 |
| BC096493   | chr11        | 107754257 | 108159760 | Prkca       | 2,39502935 | 0,00913427 | 0,01370715 |
| NM_172769  | chr9         | 42005171  | 42015228  | Sc5d        | 2,39472501 | 0,00253752 | 0,00565135 |
| BC082806   | chr13        | 64171087  | 64195758  | Habp4       | 2,39466968 | 0,00052639 | 0,00238658 |
| BC023670   | chr4         | 59129266  | 59135938  | Gng10       | 2,39369057 | 0,00731042 | 0,01160467 |
| XM_893769  | chr16        | 24444662  | 24449821  | A730098P11R | 2,3930491  | 0,00727849 | 0,01156257 |
| BC049235   | chr11        | 54746360  | 54753799  | Gpx3        | 2,39184959 | 0,00840296 | 0,01284905 |
| NM_026122  | chr9         | 82906665  | 82943243  | Hmgn3       | 2,39156776 | 0,00476611 | 0,00861679 |
| XM_990288  | chr17        | 13313854  | 13320833  | 4930513D10R | 2,38976706 | 0,00526985 | 0,00922185 |
| BC029903   | chr3         | 20314121  | 20347127  | Gyg         | 2,38902177 | 0,00105785 | 0,00342951 |
| NM_008629  | chr5         | 115690683 | 115715201 | Msi1        | 2,38732779 | 0,00038947 | 0,00206033 |
| XM_893392  | chr11        | 75835391  | 75844219  | 1500005K14R | 2,38584447 | 0,00940261 | 0,01403916 |
| NM_134022  | chr11        | 70848144  | 70849650  | 6330403K07R | 2,38383327 | 2,65E-05   | 0,00080204 |
| NM_023908  | chr7         | 74155428  | 74428293  | Slco3a1     | 2,38307331 | 0,00433174 | 0,00804934 |
| XM_621622  | chr4         | 43689776  | 43713768  | 4930500O05R | 2,38210994 | 0,00371348 | 0,00724232 |
| AK142488   | chr11        | 69215096  | 69215535  | Jmjd3       | 2,38099292 | 6,57E-05   | 0,00102744 |
| NM_027539  | chr3         | 86872079  | 87006779  | Dcamkl2     | 2,38075088 | 0,00271813 | 0,00589506 |
| AK077374   | chr11        | 76018309  | 76025611  | 2310047D13R | 2,38042636 | 0,00211801 | 0,00501981 |
| BC006935   | chr5         | 114624571 | 114641485 | Kctd10      | 2,37999191 | 0,00488512 | 0,00876734 |
| NM_172691  | chr4         | 43053609  | 43067303  | B230312A22R | 2,37788125 | 0,00196214 | 0,00486369 |
| XM_985573  | chr1         | 117512282 | 118408221 | Caspr5-1    | 2,37706826 | 0,00854799 | 0,01301407 |
| NM_172830  | chr18        | 36654125  | 36670582  | Slc4a9      | 2,37703531 | 0,00303556 | 0,0063172  |
| AK147469   | chr7         | 66138128  | 66267276  | Lrrk1       | 2,3766454  | 0,00269321 | 0,00586647 |
| NM_007404  | chr8         | 26415169  | 26482339  | Adam9       | 2,3758548  | 0,01102463 | 0,01596659 |
| AK147912   | chr9         | 22161448  | 22218760  | Rp9h        | 2,37531141 | 0,0069372  | 0,01116921 |
| XM_892747  | chr6         | 115985101 | 116099949 | Mtccc1      | 2,37421952 | 0,00296771 | 0,00623889 |
| AK051958   | chr18        | 69469860  | 69690875  | Tcf4        | 2,3740385  | 0,00209242 | 0,00500804 |
| NM_023672  | chr4         | 106409401 | 106547626 | Ssbp3       | 2,37239352 | 5,45E-05   | 0,00098615 |
| NM_177231  | chr7         | 99409568  | 99480854  | Arrb1       | 2,37176872 | 1,82E-05   | 0,00065435 |
| NM_029956  | chr5         | 114692032 | 114705026 | Mmab        | 2,37077158 | 0,00027663 | 0,00178148 |
| AK166015   | chrX         | 164457151 | 164647660 | Arhgap6     | 2,37066203 | 0,0008379  | 0,00300566 |
| BC092217   | chr10        | 39059218  | 39253833  | Fyn         | 2,37001578 | 0,00017043 | 0,00144331 |
| BC096583   | chr11        | 62464874  | 62482550  | BC025076    | 2,36968178 | 0,00138438 | 0,00399115 |
| NM_010788  | chrX         | 70279549  | 70338313  | Mecp2       | 2,36959965 | 0,00132975 | 0,00390779 |
| NM_009167  | chr13        | 51443536  | 51588327  | Shc3        | 2,36922191 | 0,00464825 | 0,0084542  |
| NM_053199  | chr1         | 175170928 | 175204370 | Igsf4b      | 2,36846114 | 0,01288854 | 0,01809737 |
| NM_016695  | chr11        | 101873108 | 101904592 | Mpp2        | 2,36826962 | 0,00214624 | 0,00504968 |
| AK147510   | chr2         | 20437359  | 20728278  | BC026657    | 2,36754197 | 0,00296943 | 0,00623979 |
| NM_172751  | chr8         | 14928876  | 15000415  | Arhgef10    | 2,36736693 | 0,00281981 | 0,00601707 |
| AK048580   | chr7         | 74265151  | 74266663  | N/A         | 2,36728488 | 0,00972327 | 0,01443479 |
| NM_011235  | chr11        | 82690908  | 82706784  | Rad51l3     | 2,36675439 | 0,00514793 | 0,00907877 |
| NM_027294  | chr9         | 114638042 | 114692850 | Cntm8       | 2,36619122 | 0,00210403 | 0,00501057 |
| NM_133350  | chr5         | 31091336  | 31142687  | Mapre3      | 2,36560085 | 0,00443443 | 0,00818516 |
| BC058238   | chr10        | 80088382  | 80104949  | Mobkl2a     | 2,36504341 | 0,00161511 | 0,00434735 |
| NM_053099  | chr18        | 78916080  | 79249018  | Setbp1      | 2,36485217 | 0,00451391 | 0,0082628  |
| NM_027923  | chr13        | 95042273  | 95043768  | 1110007C02R | 2,36387432 | 0,00547499 | 0,00946965 |
| BC027529   | chrX         | 131412929 | 131414474 | Bex2        | 2,3637924  | 0,00059844 | 0,00253221 |
| BC057986   | chr19        | 37499997  | 37505814  | Hhex        | 2,36335551 | 0,01436778 | 0,01974204 |
| BC094068   | chr8         | 73627946  | 73629604  | Jund1       | 2,36327907 | 0,0060014  | 0,01006677 |

|             |              |           |           |              |            |            |            |
|-------------|--------------|-----------|-----------|--------------|------------|------------|------------|
| NM_133774   | chr18        | 33326231  | 33338627  | Stard4       | 2,36306067 | 0,00093604 | 0,00321653 |
| NM_018772   | chr5         | 144508762 | 144518100 | Bri3         | 2,36305521 | 0,00280908 | 0,00600073 |
| NM_020002   | chr14        | 54572240  | 54579461  | Rec8L1       | 2,36208356 | 0,012515   | 0,01765603 |
| NM_028981   | chr14        | 28871081  | 29320165  | Cacna1d      | 2,36196349 | 0,00338384 | 0,00677222 |
| NM_016885   | chr3         | 137278529 | 137368456 | Emcn         | 2,36023417 | 0,00695148 | 0,01118314 |
| BC034751    | chr2         | 156112552 | 156232291 | Epb4.111     | 2,35989608 | 0,01054943 | 0,01540051 |
| AK033091    | chr13        | 55505416  | 55523060  | Pdlim7       | 2,35959076 | 0,00306762 | 0,00635886 |
| BC016111    | chr11        | 11830510  | 11927974  | Grb10        | 2,35862054 | 0,00572613 | 0,0097457  |
| NM_00103959 | chr1         | 172145535 | 172148803 | 1700015E13R  | 2,35673574 | 0,01202591 | 0,01707106 |
| BC024652    | chr6         | 17643996  | 17893020  | St7          | 2,35631105 | 0,00566705 | 0,0096894  |
| XM_203577   | chr11        | 57617831  | 57626810  | Sap30l       | 2,35628383 | 0,00445616 | 0,00820133 |
| NM_013535   | chr6         | 124704801 | 124706698 | Parcc10      | 2,35466203 | 0,00533984 | 0,00930821 |
| BC024621    | chr11        | 69807805  | 69811144  | Gabarap      | 2,35447706 | 0,00063358 | 0,00261773 |
| NM_177128   | chr16        | 36747646  | 36791952  | Iqcb1        | 2,35415068 | 0,00080622 | 0,00295797 |
| NM_145503   | chr19        | 45074700  | 45080400  | Lzts2        | 2,35377541 | 0,00151058 | 0,00418304 |
| BC021876    | chr1         | 173274292 | 173300684 | F11r         | 2,35366664 | 0,00349971 | 0,0093429  |
| XM_00100243 | chr10        | 82138310  | 82172227  | Hcfc2        | 2,35346    | 0,0144416  | 0,0198389  |
| NM_010127   | chr15        | 100403351 | 100414399 | Pou6f1       | 2,35338931 | 0,01107783 | 0,01600728 |
| M77174      | chr4         | 136740896 | 136842705 | N/A          | 2,3518021  | 0,0003515  | 0,00199014 |
| XM_994286   | chr14        | 55526055  | 55613904  | Parp4        | 2,35171516 | 0,01283241 | 0,01803981 |
| NM_022021   | chr18        | 11982809  | 12089100  | Cables1      | 2,35169886 | 0,00448034 | 0,00823422 |
| BC003762    | chr7         | 15333939  | 15345023  | Mrg2         | 2,35048206 | 0,00252301 | 0,00563115 |
| NM_019725   | chr10        | 80978660  | 80993974  | Tle2         | 2,35030828 | 0,00120706 | 0,00370572 |
| NM_173011   | chr7         | 79968358  | 79988834  | Idh2         | 2,34843012 | 0,00026039 | 0,00174432 |
| NM_008161   | chr11        | 54746372  | 54753800  | Gpx3         | 2,34839757 | 0,00634746 | 0,01048007 |
| BC005693    | chr9         | 82906665  | 82943248  | Hmgn3        | 2,34751873 | 0,00174838 | 0,00452424 |
| NM_018814   | chr12        | 82779006  | 82919772  | Pcnx         | 2,34584333 | 0,00174244 | 0,0045198  |
| NM_00101233 | chr1         | 179281335 | 179287439 | Zfp238       | 2,34483    | 0,00787763 | 0,01231098 |
| NM_013709   | chr12        | 31498272  | 31546203  | Sh3yl1       | 2,34436954 | 0,00146507 | 0,00411019 |
| NM_017479   | chr14        | 20288419  | 20460685  | Myst4        | 2,3429454  | 0,00565989 | 0,0096855  |
| BC013068    | chr19        | 17627676  | 17904271  | Pcsk5        | 2,34249613 | 0,00152851 | 0,00420209 |
| AK004655    | chr19        | 38120185  | 38139566  | Cep55        | 2,34202531 | 0,00136636 | 0,00396797 |
| XM_618882   | chr11        | 62465643  | 62482551  | BC025076     | 2,34168443 | 0,0006855  | 0,00272281 |
| NM_00103937 | chr3         | 97775232  | 97974112  | Pde4dip      | 2,34124622 | 0,00111584 | 0,00353677 |
| NM_010292   | chr11        | 5800825   | 5849602   | Gck          | 2,34104608 | 0,00108078 | 0,0034699  |
| NM_020293   | chr17        | 23410205  | 23411640  | Clnd9        | 2,34066208 | 0,01140775 | 0,01638016 |
| BC008998    | chr11        | 100676636 | 100700312 | Stat5a       | 2,34024569 | 0,00127787 | 0,00382849 |
| NM_010363   | chr12        | 88036820  | 88053826  | Gstz1        | 2,34021325 | 0,003406   | 0,00679832 |
| XM_899437   | chr14        | 6608365   | 6609056   | Flnb         | 2,33750589 | 0,00191134 | 0,00478195 |
| NM_016757   | chr6         | 83084702  | 83087081  | Wbp1         | 2,33619387 | 0,00044654 | 0,00223155 |
| NM_133710   | chr9         | 118775150 | 118892696 | Ctdspl       | 2,33567034 | 0,00445695 | 0,00820133 |
| NM_018798   | chrX         | 148838947 | 148842278 | Ubqln2       | 2,33428384 | 0,00324785 | 0,00660715 |
| NM_00102472 | chr3         | 101992814 | 102053440 | N/A          | 2,3328281  | 0,0138328  | 0,01913928 |
| BC055434    | chr4         | 59129284  | 59135948  | Gng10        | 2,33186349 | 0,01033038 | 0,01515495 |
| NM_144895   | chr3         | 55200068  | 55223886  | Spg20        | 2,33134094 | 9,53E-05   | 0,00115445 |
| XM_980711   | chr4         | 141579840 | 141618551 | LOC665983    | 2,33092621 | 0,01152374 | 0,01650361 |
| BC095977    | chr12        | 8339454   | 8369822   | Hs1bp3       | 2,32935415 | 0,00641657 | 0,01056493 |
| BC043076    | chr3         | 154532542 | 154558473 | Cryz         | 2,32912812 | 0,00049005 | 0,00232615 |
| BC066064    | chr8         | 113806642 | 113858891 | St3gal2      | 2,3289613  | 0,00107339 | 0,00345736 |
| NM_009414   | chr7         | 46515217  | 46540579  | Tph1         | 2,3283856  | 0,01345823 | 0,0187472  |
| BC025076    | chr11        | 62480900  | 62481527  | BC025076     | 2,32534267 | 0,00043195 | 0,00219089 |
| AK003019    | chr13        | 55516395  | 55523024  | Pdlim7       | 2,32423079 | 0,00212629 | 0,00502188 |
| XM_901143   | chr9         | 42714836  | 42719278  | LOC545339    | 2,32378512 | 0,00212853 | 0,00502188 |
| BC055893    | chr5         | 130039833 | 130072637 | Gbas         | 2,32361331 | 0,00050564 | 0,00234312 |
| BC017538    | chr4         | 53735265  | 53784055  | Fcmd         | 2,32284572 | 0,00070225 | 0,00277023 |
| BC031363    | chr13_random | 114708    | 127798    | Hmgcs1       | 2,32121475 | 0,00040314 | 0,00209367 |
| NM_173784   | chr11        | 32355371  | 32418709  | 9630054F20Ri | 2,32080182 | 0,00085835 | 0,00304849 |
| NM_178283   | chr13        | 3633321   | 3651025   | Asb13        | 2,31935448 | 0,00217314 | 0,0051009  |
| NM_00102621 | chr12        | 85263604  | 85298777  | Entpd5       | 2,31909727 | 0,00270361 | 0,00587575 |
| NM_145630   | chrX         | 90017334  | 90084814  | Pdk3         | 2,31841687 | 3,81E-05   | 0,0008798  |
| NM_011988   | chr3         | 90471166  | 90475854  | Slc27a3      | 2,31784914 | 0,00660692 | 0,01080078 |
| NM_007796   | chr13        | 60944395  | 60946157  | Ctla2a       | 2,31594341 | 0,00373623 | 0,00728431 |
| NM_173398   | chr3         | 59184635  | 59189701  | Gpr171       | 2,31495369 | 0,00229781 | 0,00528532 |
| BC014821    | chrX         | 70174841  | 70183506  | Renbp        | 2,31473975 | 0,00041086 | 0,00212047 |
| XM_976690   | chr1         | 87327496  | 87345775  | LOC665408    | 2,31353672 | 0,00037611 | 0,00204961 |
| AK163950    | chr11        | 107754266 | 107795729 | Prkca        | 2,31298087 | 0,00235559 | 0,00537263 |
| BC002126    | chr11        | 69807801  | 69811144  | Gabarap      | 2,31297018 | 0,00051662 | 0,00235843 |
| NM_178598   | chr1         | 174336938 | 174344055 | Tagln2       | 2,31291674 | 0,00151831 | 0,00418958 |
| NM_019946   | chr6         | 138104732 | 138120948 | Mgst1        | 2,31251063 | 0,00514787 | 0,00907877 |
| XM_908667   | chr16        | 11279902  | 11319188  | LOC634059    | 2,31227021 | 0,00357774 | 0,00704442 |
| AK089064    | chr2         | 168325644 | 168425449 | Atp9a        | 2,31140489 | 0,00036958 | 0,0020421  |
| NM_026162   | chr2         | 16274075  | 16669869  | Plxdc2       | 2,31140489 | 0,0072166  | 0,01148028 |
| BC016621    | chr12        | 81027537  | 81031838  | Zfp361l      | 2,3111539  | 0,00162627 | 0,00436096 |
| BC028753    | chr3         | 32776601  | 32808055  | Gnb4         | 2,30695522 | 0,00072232 | 0,00278211 |
| NM_181404   | chr19        | 25304298  | 25501593  | Ankrd15      | 2,30642759 | 0,00652252 | 0,01069213 |
| NM_134068   | chr13        | 30667560  | 30718690  | Dusp22       | 2,30613984 | 0,00537694 | 0,00935161 |

|             |       |           |           |              |            |            |             |
|-------------|-------|-----------|-----------|--------------|------------|------------|-------------|
| BC066856    | chr12 | 99079547  | 99134863  | Ptpn21       | 2,30346126 | 0,00031787 | 0,00189521  |
| NM_175752   | chr2  | 73411583  | 73461205  | Chn1         | 2,30267372 | 0,01076118 | 0,01565214  |
| NM_009122   | chr17 | 51204397  | 51297562  | Satb1        | 2,30218962 | 0,00435073 | 0,00807568  |
| BC095964    | chr1  | 108369289 | 108541491 | Bcl2         | 2,30170563 | 0,00668091 | 0,01089013  |
| NM_175007   | chr13 | 18955835  | 19158380  | Amph         | 2,30155673 | 0,00310345 | 0,00639874  |
| NM_153127   | chr14 | 33204620  | 33232834  | Mmrrn2       | 2,30069541 | 0,00658221 | 0,01076663  |
| NM_025598   | chr2  | 181116749 | 181117911 | 2700038C09R  | 2,30001151 | 0,01346309 | 0,01874958  |
| NM_178048   | chr8  | 113806598 | 113858234 | St3gal2      | 2,29976004 | 0,00225488 | 0,00102766  |
| NM_007552   | chr2  | 18594771  | 18604383  | Bmi1         | 2,29863914 | 0,01369252 | 0,01898483  |
| AK006879    | chr11 | 69217707  | 69218886  | 1700064E03R  | 2,29759312 | 0,00015494 | 0,00139921  |
| NM_021458   | chr14 | 64156508  | 64214778  | Fzd3         | 2,29696149 | 0,00824848 | 0,0126844   |
| NM_030266   | chr1  | 37302464  | 37352805  | Inpp4a       | 2,29605415 | 6,40E-05   | 0,00102744  |
| NM_172414   | chr12 | 86177755  | 86188461  | 2810002I04Ri | 2,29562448 | 0,004591   | 0,00836538  |
| NM_146236   | chrX  | 132054428 | 132056232 | Tceal1       | 2,29507293 | 0,00986197 | 0,01460796  |
| BC057606    | chr5  | 65410365  | 65447111  | Klhl5        | 2,29435717 | 0,00054831 | 0,00241621  |
| BC100439    | chr2  | 181116742 | 181117911 | 2700038C09R  | 2,29418755 | 0,00237    | 0,0053993   |
| NM_007855   | chr1  | 93631882  | 93678433  | Twist2       | 2,29367873 | 0,01154143 | 0,01651705  |
| NM_207659   | chr8  | 27497434  | 27584559  | Hook3        | 2,29323892 | 0,00088064 | 0,00309573  |
| AK153375    | chr10 | 126992105 | 127023920 | Lrp1         | 2,29222183 | 0,00538482 | 0,00936259  |
| AK077713    | chr9  | 66827037  | 66848305  | Tpm1         | 2,29089288 | 0,00066552 | 0,0026795   |
| NM_008876   | chr11 | 70356358  | 70374305  | Pld2         | 2,29088229 | 0,0017511  | 0,00452537  |
| AK013367    | chr1  | 87877438  | 87886626  | 2810459M11R  | 2,29078173 | 0,00573926 | 0,00975702  |
| NM_013755   | chr3  | 20314120  | 20347088  | Gyg          | 2,28871316 | 0,00164439 | 0,00439436  |
| XM_892874   | chr6  | 116229853 | 116295246 | Anubl1       | 2,28845935 | 0,00512024 | 0,00905174  |
| NM_181857   | chr5  | 34324054  | 34486305  | Poln         | 2,28552669 | 0,00495725 | 0,0088462   |
| BC031543    | chr14 | 53870844  | 53879792  | Efs          | 2,28527323 | 0,00328219 | 0,00665141  |
| NM_175485   | chr9  | 72605779  | 72712159  | Prtg         | 2,28379    | 0,00033288 | 0,0019437   |
| AK158216    | chr11 | 117981667 | 118028829 | Pscd1        | 2,28343122 | 0,00039229 | 0,00206566  |
| XM_902109   | chr2  | 132381723 | 132442675 | 1110034G24R  | 2,28297227 | 0,00547418 | 0,00946965  |
| NM_145142   | chr1  | 38808417  | 38842706  | Chst10       | 2,28272436 | 0,00417077 | 0,00784174  |
| AK132175    | chr9  | 100961549 | 101055336 | 3222402P14Ri | 2,28084752 | 0,00119941 | 0,00369159  |
| BC012643    | chr13 | 4267421   | 4278608   | Akr1c12      | 2,28041543 | 0,00892031 | 0,01346062  |
| XM_993154   | chr14 | 53829801  | 53833887  | Ppp1r3e      | 2,27964103 | 0,00217875 | 0,00511204  |
| NM_139143   | chr18 | 24722890  | 24744582  | Slc39a6      | 2,27873527 | 0,00260304 | 0,00574577  |
| BC059266    | chr2  | 63778198  | 63898877  | Fign         | 2,27806145 | 0,00200183 | 0,00490922  |
| XM_983429   | chr10 | 74504611  | 74626666  | Bcr          | 2,27805619 | 0,00019069 | 0,00149871  |
| NM_022996   | chr18 | 38544948  | 38590373  | Ndfip1       | 2,27781935 | 0,00174014 | 0,0045186   |
| NM_00101742 | chr11 | 69214702  | 69229870  | Jmjd3        | 2,27700901 | 0,00187089 | 0,00471776  |
| XM_897143   | chr2  | 73329977  | 73330613  | LOC622510    | 2,27697218 | 0,00804343 | 0,01248502  |
| AK012311    | chr19 | 38120154  | 38127930  | Cep55        | 2,27635674 | 0,00500442 | 0,00890638  |
| AK164914    | chr2  | 6462112   | 6998514   | Cugbp2       | 2,2761674  | 0,00068387 | 0,00272066  |
| NM_025284   | chr6  | 72886861  | 72887908  | Tmsb10       | 2,27556269 | 0,00310571 | 0,00639874  |
| NM_009652   | chr12 | 113101628 | 113121998 | Akt1         | 2,27532085 | 0,0120073  | 0,01705277  |
| NM_153107   | chr5  | 35819195  | 35842396  | Cpz          | 2,27519994 | 0,01291378 | 0,01812428  |
| NM_024255   | chr4  | 59675743  | 59712121  | Hsd12        | 2,27253629 | 0,0035987  | 0,00707074  |
| BC051972    | chr7  | 29493349  | 29502757  | Zfp30        | 2,27170159 | 0,00238051 | 0,00541295  |
| BC068317    | chr11 | 70356537  | 70374305  | Pld2         | 2,27170159 | 0,00299676 | 0,00627342  |
| AK163020    | chr2  | 17294647  | 17308762  | N/A          | 2,27114529 | 0,01086143 | 0,01578257  |
| BC053092    | chr12 | 112276264 | 112355889 | Ppp1r13b     | 2,27097738 | 0,00354578 | 0,00700229  |
| NM_026819   | chr14 | 54693090  | 54699663  | Dhrs1        | 2,26954013 | 0,00305712 | 0,00634628  |
| NM_008516   | chr6  | 107495559 | 107535987 | Lrrn1        | 2,26916786 | 0,00030756 | 0,00186288  |
| NM_206974   | chr14 | 60561566  | 60566943  | Kcnrg        | 2,26905776 | 0,01157445 | 0,01655627  |
| NM_009369   | chr13 | 56619224  | 56648961  | Tgfb1        | 2,26879564 | 0,00719776 | 0,01145875  |
| NM_011896   | chr3  | 37831524  | 37836146  | Spry1        | 2,26830819 | 0,00666476 | 0,01087149  |
| BC027381    | chr3  | 59304288  | 59315428  | P2ry12       | 2,26817193 | 0,00562937 | 0,00965219  |
| BC003800    | chr3  | 154532511 | 154558473 | Cryz         | 2,26764793 | 3,46E-05   | 0,00083399  |
| BC029024    | chrX  | 53126521  | 53140129  | Fhl1         | 2,26619708 | 0,00147974 | 0,000412948 |
| BC023432    | chr15 | 98995123  | 99041239  | Spats2       | 2,26599812 | 0,00019566 | 0,00151695  |
| NM_00100381 | chr2  | 156112492 | 156234655 | Epb4.111     | 2,26433383 | 0,00122116 | 0,00372598  |
| AK132512    | chr8  | 8618584   | 8661211   | Efnb2        | 2,26422919 | 0,00282255 | 0,00602077  |
| NM_207682   | chr4  | 148020120 | 148151498 | Kif1b        | 2,26393102 | 0,00516079 | 0,00908969  |
| NM_023320   | chr3  | 96074232  | 96081244  | Plekho1      | 2,2635492  | 2,96E-05   | 0,00083399  |
| BC100446    | chr5  | 135308163 | 135335723 | Stx1a        | 2,26054922 | 0,00316029 | 0,00648148  |
| BC039139    | chr3  | 37831510  | 37836139  | Spry1        | 2,26029331 | 0,00316749 | 0,00649346  |
| AK132307    | chr6  | 143978363 | 144166620 | N/A          | 2,25924908 | 0,0049839  | 0,00888312  |
| AK158966    | chrX  | 53078813  | 53140122  | Fhl1         | 2,25911858 | 0,00260524 | 0,00574849  |
| AK141422    | chr11 | 101873613 | 101898574 | Mpp2         | 2,25818967 | 0,00172736 | 0,00450286  |
| NM_053202   | chr6  | 98895552  | 99128481  | Foxp1        | 2,25785577 | 1,17E-05   | 0,00058108  |
| BC027506    | chr19 | 46743244  | 46755209  | 2010012O05R  | 2,25772014 | 0,00437344 | 0,00810773  |
| BC069976    | chr11 | 70848136  | 70849650  | 6330403K07R  | 2,25754279 | 7,17E-06   | 0,00053713  |
| NM_009229   | chr8  | 109824878 | 109903321 | Sntb2        | 2,25636428 | 0,00448797 | 0,00824315  |
| NM_134090   | chr15 | 79343722  | 79354994  | Kdelr3       | 2,25531143 | 0,00543946 | 0,00942461  |
| NM_015818   | chr1  | 36012954  | 36050992  | Hs6st1       | 2,25337903 | 8,45E-05   | 0,00112072  |
| BC051512    | chr4  | 110931159 | 110957857 | 2310026E23R  | 2,25329052 | 0,00142271 | 0,0040492   |
| BC020189    | chr9  | 121966072 | 122016736 | Snrk         | 2,25145348 | 0,01103374 | 0,01596659  |
| BC025118    | chr1  | 16330903  | 16504439  | Stau2        | 2,25073052 | 0,00054951 | 0,00241964  |

|             |              |           |           |              |            |            |            |
|-------------|--------------|-----------|-----------|--------------|------------|------------|------------|
| AK053853    | chr5         | 36377941  | 36715202  | Sorcs2       | 2,25068892 | 0,01184604 | 0,01687198 |
| NM_013626   | chr1         | 99651499  | 99925919  | Pam          | 2,25067852 | 0,00612384 | 0,01021839 |
| NM_011701   | chr2         | 13491804  | 13500660  | Vim          | 2,25057972 | 0,01369013 | 0,01898483 |
| NM_008443   | chr11        | 53410825  | 53445377  | Kif3a        | 2,25034053 | 0,00165347 | 0,00440482 |
| NM_007715   | chr5         | 77286951  | 77379323  | Clock        | 2,24899949 | 0,01103333 | 0,01596659 |
| NM_009749   | chrX         | 131412929 | 131414474 | Bex2         | 2,24824096 | 0,00054151 | 0,00240593 |
| AK033364    | chr7         | 80915904  | 80918675  | Zfp592       | 2,24759174 | 0,01353524 | 0,01883686 |
| AK142345    | chr7         | 15333925  | 15338380  | N/A          | 2,2468804  | 0,00613661 | 0,01023398 |
| NM_029519   | chr14        | 119613640 | 119642374 | Rap2a        | 2,2456867  | 0,00232308 | 0,005327   |
| NM_010158   | chr15        | 68758088  | 68923188  | Khdrbs3      | 2,24528202 | 0,00817007 | 0,01260936 |
| BC057853    | chr3         | 122036481 | 122172081 | Abca4        | 2,24180895 | 0,00811535 | 0,01257373 |
| BC029693    | chr13_random | 114708    | 132341    | Hmgcs1       | 2,23927234 | 0,00076685 | 0,00288586 |
| U10102      | chr2         | 152473220 | 152521751 | Bcl2l1       | 2,23841365 | 0,00027265 | 0,00176743 |
| AK158803    | chr2         | 24876414  | 24884889  | Nelf         | 2,23810336 | 0,00650584 | 0,0106742  |
| XM_00100438 | chr3         | 145924784 | 145959489 | Syde2        | 2,23744673 | 0,002732   | 0,00590684 |
| AK018520    | chr9         | 9109200   | 9200868   | 9030420J04Ri | 2,23709005 | 0,00988994 | 0,01463535 |
| NM_019880   | chr17        | 29059087  | 29074916  | Mtch1        | 2,23682646 | 0,00025669 | 0,00172533 |
| NM_053201   | chrX         | 101323139 | 101326646 | Magee1       | 2,23644922 | 0,00055055 | 0,00242028 |
| NM_008994   | chr3         | 5543576   | 5559201   | Pxmp3        | 2,23145287 | 0,00211393 | 0,00501921 |
| BC110043    | chr12        | 31497742  | 31546208  | Sh3yl1       | 2,23139615 | 0,00226239 | 0,00523414 |
| XM_136361   | chr1         | 167132440 | 167158526 | Gpr161       | 2,23043226 | 0,00557063 | 0,00957121 |
| NM_011101   | chr11        | 107754337 | 108160018 | Prkca        | 2,22966969 | 0,00947404 | 0,01413046 |
| NM_010797   | chrX         | 165029351 | 165344845 | Mid1         | 2,22907733 | 0,00303796 | 0,00631948 |
| NM_021716   | chr2         | 63778669  | 63898827  | Fign         | 2,22901038 | 0,00120982 | 0,00370846 |
| BC098500    | chr12        | 99079547  | 99138455  | Ptpn21       | 2,22773352 | 0,00222396 | 0,0051794  |
| AK154704    | chr2         | 156112530 | 156234653 | Epb4.111     | 2,22736295 | 0,00438514 | 0,00812185 |
| NM_139150   | chr1         | 60042826  | 60095580  | Carf         | 2,22197102 | 0,00193132 | 0,00481377 |
| BC099479    | chr15        | 78754022  | 78757449  | Lgals1       | 2,22108817 | 0,01364808 | 0,0189585  |
| BC052451    | chr4         | 109704067 | 109785406 | Elavl4       | 2,21965173 | 0,00201345 | 0,00492216 |
| NM_175074   | chr9         | 82906665  | 82943322  | Hmgcn3       | 2,21937994 | 0,00599936 | 0,01006677 |
| NM_011764   | chr8         | 109304509 | 109314963 | Zfp90        | 2,21855451 | 0,00153085 | 0,00420209 |
| NM_178884   | chr1         | 75373686  | 75388789  | AW822216     | 2,21801635 | 6,60E-05   | 0,00102744 |
| NM_172525   | chr3         | 121945348 | 122008176 | Arhgap29     | 2,21784724 | 0,00068091 | 0,00271362 |
| BC053428    | chr3         | 37831495  | 37836146  | Spry1        | 2,21762691 | 0,00426936 | 0,00796182 |
| AK147742    | chr11        | 95091470  | 95119266  | N/A          | 2,21750394 | 0,00100504 | 0,00336064 |
| BC012715    | chr3         | 98747696  | 98774592  | Hsd3b5       | 2,21746807 | 9,25E-06   | 0,00054925 |
| NM_133903   | chr5         | 33530374  | 33535040  | Spon2        | 2,21487713 | 0,00175598 | 0,00453602 |
| BC098461    | chr3         | 25624518  | 26344380  | Nlgn1        | 2,21467244 | 0,00554647 | 0,0095462  |
| BC055056    | chr3         | 146422829 | 146432501 | Spata1       | 2,21460592 | 0,01138695 | 0,01635879 |
| NM_172689   | chr4         | 40394460  | 40428372  | Ddx58        | 2,21450359 | 0,00010356 | 0,00119191 |
| AY138991    | chr8         | 88530640  | 88581078  | Neto2        | 2,2125448  | 0,00940809 | 0,01404382 |
| AK147078    | chr11        | 53410841  | 53444528  | Kif3a        | 2,21086357 | 0,0021273  | 0,00502188 |
| NM_021374   | chr1         | 4900325   | 5009967   | Rgs20        | 2,20920914 | 0,00289896 | 0,00613765 |
| NM_007670   | chr4         | 88777555  | 88782190  | Edgn2b       | 2,20869366 | 0,00966562 | 0,01437182 |
| NM_010333   | chr9         | 20716359  | 20727183  | Ekg5         | 2,20804055 | 0,00026768 | 0,00175615 |
| AB107918    | chr12        | 4856142   | 4863785   | Fkbp1b       | 2,20640353 | 0,00772367 | 0,01212761 |
| AK040509    | chr2         | 93637857  | 93650696  | 2610203E10R  | 2,20601612 | 0,00118734 | 0,00366593 |
| NM_025277   | chr4         | 59129209  | 59135953  | Gng10        | 2,20542495 | 0,00746023 | 0,01179159 |
| AK144324    | chr10        | 30385306  | 30492354  | Ncoa7        | 2,20512942 | 0,01191992 | 0,01696381 |
| BC049184    | chr1         | 74324955  | 74330200  | Ctdsp1       | 2,20423799 | 0,00116968 | 0,0036378  |
| BC053048    | chr5         | 134774013 | 134837061 | Cyln2        | 2,20399864 | 0,00929308 | 0,01391045 |
| AK156246    | chr15        | 79551327  | 79569791  | Unc84b       | 2,20373895 | 0,00221286 | 0,00516657 |
| NM_178663   | chr2         | 4635416   | 4718197   | E130319B15R  | 2,20372367 | 0,00619678 | 0,01030669 |
| AK048720    | chr15        | 98954838  | 99034524  | Spats2       | 2,20371349 | 0,00269439 | 0,00586647 |
| BC075702    | chr4         | 97269662  | 97604400  | Nfia         | 2,20358111 | 0,00938448 | 0,01402228 |
| NM_010345   | chr11        | 11830510  | 11937358  | Grb10        | 2,20350983 | 0,00815799 | 0,01259904 |
| AY899808    | chr18        | 15111703  | 15294464  | Kctd1        | 2,20333165 | 0,00664745 | 0,0108492  |
| BC069900    | chr11        | 69499243  | 69501708  | Tnfrsf13     | 2,20115896 | 0,00053752 | 0,00240299 |
| NM_173863   | chr7         | 80461671  | 80562225  | Crtc3        | 2,19996413 | 0,0049546  | 0,0088462  |
| NM_027192   | chr2         | 128757429 | 128785190 | Ttl          | 2,19967442 | 0,0014193  | 0,0040468  |
| BC039980    | chr4         | 153108414 | 153118983 | Megf6        | 2,19949146 | 0,00195107 | 0,00484476 |
| NM_175212   | chr15        | 58612351  | 58653510  | Tmem65       | 2,19849563 | 0,00225563 | 0,0052266  |
| BC107006    | chr9         | 50285572  | 50302932  | Bcdo2        | 2,1981604  | 0,00590294 | 0,00993882 |
| NM_177914   | chrX         | 6030444   | 6103753   | Dgkk         | 2,19591671 | 0,0013461  | 0,00394564 |
| AK165769    | chr2         | 164659445 | 164690932 | Slc12a5      | 2,19473487 | 0,00613896 | 0,01023421 |
| NM_207202   | chrX         | 6888672   | 6898283   | DXImx50e     | 2,19407575 | 0,00063318 | 0,00261773 |
| XM_912234   | chr8         | 72583480  | 72593159  | LOC636741    | 2,19336615 | 0,00439136 | 0,00812925 |
| NM_133832   | chr1         | 16091095  | 16117764  | Rdh10        | 2,19240349 | 0,01035992 | 0,01518334 |
| AB093303    | chr2         | 79436388  | 79473801  | Ssfa2        | 2,1918109  | 0,00090795 | 0,00314904 |
| BC009002    | chr2         | 50953389  | 50971094  | Rnd3         | 2,19072238 | 0,0003209  | 0,00655646 |
| AK146652    | chrX         | 70174843  | 70183534  | Renbp        | 2,18978111 | 0,00158361 | 0,00429125 |
| BC032149    | chr10        | 39144330  | 39253759  | Fyn          | 2,18938651 | 7,66E-05   | 0,00108714 |
| NM_00103776 | chr11        | 59956276  | 60015390  | Rai1         | 2,18804135 | 0,0007175  | 0,00278211 |
| AY259047    | chr15        | 100406280 | 100423068 | Pou6f1       | 2,18779364 | 0,0001056  | 0,00120842 |
| BC064115    | chr4         | 119028250 | 119029414 | AA415398     | 2,18760157 | 0,01129845 | 0,01627086 |
| AF528078    | chr11        | 3230810   | 3233950   | 1500004A08R  | 2,1873994  | 0,00980762 | 0,01453468 |



|             |       |           |           |              |            |            |            |
|-------------|-------|-----------|-----------|--------------|------------|------------|------------|
| NM_146202   | chr7  | 127133942 | 127136462 | BC026432     | 2,18635853 | 0,00234425 | 0,00535495 |
| AK052357    | chr4  | 53735262  | 53783887  | Fcmd         | 2,18631812 | 0,00079854 | 0,00294539 |
| NM_194057   | chr7  | 30569327  | 30570230  | Ffar1        | 2,18589384 | 0,00570022 | 0,00971917 |
| BC048680    | chr15 | 31385801  | 31398214  | Ropn1l       | 2,18577768 | 0,01204229 | 0,01708618 |
| NM_172468   | chr4  | 59899703  | 59998794  | Snx30        | 2,18333474 | 0,0002955  | 0,00183847 |
| AK136317    | chr3  | 60665627  | 60669289  | N/A          | 2,18323889 | 0,01348724 | 0,01877883 |
| AK220340    | chr10 | 90419116  | 90512538  | Apaf1        | 2,18202354 | 0,00105953 | 0,00343126 |
| NM_198425   | chr7  | 27976640  | 27977928  | Cri2         | 2,18043603 | 0,01074384 | 0,01564601 |
| NM_019491   | chr13 | 17665716  | 17729359  | Rala         | 2,17936323 | 0,00017836 | 0,00146584 |
| NM_009459   | chr6  | 30162974  | 30254355  | Ube2h        | 2,17929777 | 0,0023287  | 0,00532963 |
| BC099434    | chr9  | 65263286  | 65285461  | Spg21        | 2,17877417 | 0,00072989 | 0,00279666 |
| NM_026484   | chr18 | 9314041   | 9450148   | 5730405I09Ri | 2,17871879 | 0,00166585 | 0,00441792 |
| BC019726    | chr13 | 120547794 | 120576162 | Paip1        | 2,17670616 | 0,00102498 | 0,00337061 |
| NM_173788   | chr4  | 43653034  | 43672344  | Npr2         | 2,17618821 | 0,00185711 | 0,00469238 |
| NM_011873   | chr15 | 100443695 | 100448795 | Dazap2       | 2,17606251 | 0,00099967 | 0,0033502  |
| BC053436    | chr9  | 40764702  | 40908523  | 2810457I06Ri | 2,17309815 | 0,00180696 | 0,00462562 |
| XM_975192   | chr2  | 25748972  | 25806035  | Camsap1      | 2,17287724 | 0,01198252 | 0,01702163 |
| NM_025664   | chr17 | 5797861   | 5887193   | Snx9         | 2,16939085 | 0,00293633 | 0,00619475 |
| AK006539    | chr15 | 78962013  | 78968486  | 1700088E04R  | 2,16937581 | 3,18E-05   | 0,00083399 |
| NM_029179   | chr18 | 80418422  | 80454083  | Pqlc1        | 2,16936579 | 0,00102014 | 0,0037061  |
| NM_007961   | chr6  | 134001399 | 134235851 | Etv6         | 2,16911519 | 0,00091769 | 0,00316806 |
| BC011132    | chr17 | 51204399  | 51298129  | Satb1        | 2,16893477 | 0,00687455 | 0,0110893  |
| NM_016747   | chrX  | 96970465  | 97021127  | Dlgh3        | 2,16886963 | 0,00088025 | 0,00309573 |
| BC060059    | chr9  | 108653353 | 108655212 | Ihpk2        | 2,16846877 | 0,00853612 | 0,01300597 |
| BC046996    | chr3  | 133029256 | 133047367 | Ints12       | 2,16697123 | 0,00441258 | 0,00815747 |
| NM_053207   | chr8  | 127794675 | 127801870 | Egln1        | 2,16688612 | 0,00681271 | 0,01102201 |
| NM_00100578 | chr4  | 97887843  | 97989651  | Inadl        | 2,1668711  | 2,40E-05   | 0,0007493  |
| NM_013681   | chr6  | 115100520 | 115240707 | Syn2         | 2,16529461 | 0,00252583 | 0,00563375 |
| NM_00101497 | chr12 | 35632288  | 35730455  | Snx13        | 2,16433427 | 0,00017811 | 0,00146584 |
| BC049861    | chr1  | 174336723 | 174344047 | Tagln2       | 2,16412425 | 0,0075258  | 0,01187833 |
| BC058557    | chr12 | 31497743  | 31546201  | Sh3yl1       | 2,16404425 | 0,00221415 | 0,00516664 |
| NM_009185   | chr4  | 114498131 | 114540831 | Stil         | 2,16294953 | 0,00139504 | 0,00401025 |
| BC031379    | chr7  | 79799382  | 79808776  | 2610034B18R  | 2,16275463 | 0,0006845  | 0,00272066 |
| BC098483    | chrX  | 135168269 | 135217973 | Morc4        | 2,16174048 | 0,00313912 | 0,00644693 |
| NM_010590   | chr14 | 53521676  | 53531621  | Hub          | 2,16161062 | 0,00614018 | 0,01023421 |
| NM_010441   | chr10 | 119765151 | 119880028 | Hmga2        | 2,16158565 | 0,00061272 | 0,00256173 |
| AF176007    | chr17 | 29059088  | 29074916  | Mtch1        | 2,16071182 | 0,00046456 | 0,00227771 |
| NM_175447   | chr1  | 137401183 | 137416361 | LOC215714    | 2,16040731 | 0,00157856 | 0,00428382 |
| XM_144060   | chr4  | 137841142 | 137896088 | 4931403E03R  | 2,15864599 | 0,01219276 | 0,01727501 |
| BC048694    | chr4  | 131040533 | 131110310 | Ptpru        | 2,15728482 | 0,00037721 | 0,00204961 |
| BC003254    | chr6  | 124708164 | 124712424 | N/A          | 2,15667682 | 0,00624374 | 0,01036222 |
| XM_00100361 | chr4  | 149314040 | 149465771 | Rere         | 2,15571531 | 0,00100503 | 0,00336064 |
| AK078208    | chr1  | 4900050   | 5010891   | Rgs20        | 2,15456507 | 0,00312748 | 0,00643102 |
| AK136048    | chr4  | 97908613  | 97926166  | Inadl        | 2,15452524 | 0,01075254 | 0,01564721 |
| NM_026376   | chr6  | 115921358 | 115960583 | Plxnd1       | 2,15450035 | 0,00830053 | 0,01273088 |
| BC021308    | chr3  | 108807149 | 108839439 | Gpsm2        | 2,15346519 | 0,0002106  | 0,00157543 |
| XM_902349   | chr11 | 112859978 | 113017721 | 2610035D17R  | 2,15310698 | 0,00563072 | 0,00965219 |
| NM_153588   | chr16 | 13272216  | 13326281  | Mkl2         | 2,15289805 | 0,0001823  | 0,00147652 |
| NM_026003   | chr19 | 26815499  | 26845418  | Smarca2      | 2,15282343 | 0,00816348 | 0,01260244 |
| AK019258    | chr11 | 83667432  | 83722112  | Tcf2         | 2,15185371 | 0,00814073 | 0,01258838 |
| NM_177267   | chr12 | 81255530  | 81355387  | Wdr22        | 2,1508546  | 0,00017507 | 0,00145777 |
| NM_133919   | chr5  | 104023425 | 104091425 | Aff1         | 2,14985099 | 0,00012069 | 0,00128228 |
| AF285577    | chrX  | 156468372 | 156600989 | Scml2        | 2,14975661 | 0,00205662 | 0,00497067 |
| NM_010162   | chr15 | 52898621  | 53176027  | Ext1         | 2,14963741 | 0,00540128 | 0,0093748  |
| BC109358    | chr6  | 134796003 | 134822842 | Crebl2       | 2,14829185 | 0,00024674 | 0,00169777 |
| BC002063    | chr15 | 78753996  | 78757449  | Lgals1       | 2,14792458 | 0,0102402  | 0,0115056  |
| NM_177338   | chr14 | 63776327  | 63903957  | Hmbox1       | 2,14739363 | 1,21E-05   | 0,0005908  |
| NM_175215   | chr7  | 67101557  | 67107406  | Lysmd4       | 2,14736882 | 0,00326491 | 0,00662764 |
| NM_027920   | chr6  | 116303741 | 116375159 | March8       | 2,14583627 | 0,00036645 | 0,00203261 |
| NM_178607   | chr2  | 130989928 | 131044266 | Rnf24        | 2,14575694 | 0,00189385 | 0,00475321 |
| AK134855    | chr9  | 42714838  | 42716807  | Arhgef12     | 2,14543967 | 0,00015531 | 0,00139921 |
| AK084803    | chr1  | 45319763  | 45447464  | Col5a2       | 2,14137382 | 0,00788291 | 0,01231601 |
| NM_00103328 | chr1  | 191574925 | 191577477 | C130080N23R  | 2,14077524 | 0,00867851 | 0,01317771 |
| NM_011857   | chr8  | 49726500  | 50173507  | Odz3         | 2,14035979 | 0,00628167 | 0,01040279 |
| NM_007915   | chr9  | 36528825  | 36546739  | Ei24         | 2,13983566 | 0,00815916 | 0,01259904 |
| NM_174847   | chr16 | 98013677  | 98077513  | 5830404H04R  | 2,13932648 | 0,00297243 | 0,00624002 |
| AB093236    | chr10 | 74656105  | 74756089  | 4932439K10R  | 2,13909912 | 0,00128275 | 0,00383096 |
| AK006904    | chr4  | 41706107  | 41707600  | 1700066J24Ri | 2,13879766 | 0,00585984 | 0,00990259 |
| NM_0228736  | chr10 | 119222571 | 119478657 | Grip1        | 2,13705889 | 0,00099714 | 0,0033455  |
| BC049153    | chr7  | 112695439 | 112697965 | 2610024B07R  | 2,1365948  | 0,00119748 | 0,00368768 |
| BC108969    | chr7  | 99409801  | 99475737  | Arrb1        | 2,13433011 | 0,00050847 | 0,00234789 |
| NM_018873   | chr11 | 97327758  | 97391216  | P140         | 2,13399481 | 0,00046692 | 0,00228554 |
| XM_204283   | chr8  | 64403397  | 64794832  | Palld        | 2,13297935 | 0,00387513 | 0,00748085 |
| NM_019747   | chr5  | 138371224 | 138385476 | Zfp113       | 2,13211709 | 0,01141946 | 0,01638328 |
| NM_007881   | chr6  | 124708162 | 124722106 | Atn1         | 2,13181661 | 0,00631049 | 0,01043348 |
| NM_009441   | chr16 | 94492709  | 94578019  | Ttc3         | 2,13161467 | 0,00029798 | 0,00183877 |

|             |       |           |           |             |            |            |            |
|-------------|-------|-----------|-----------|-------------|------------|------------|------------|
| NM_027543   | chrX  | 147685361 | 147708827 | Gpr173      | 2,13083665 | 0,0108103  | 0,01571976 |
| AK081802    | chr6  | 143863793 | 144161586 | Sox5        | 2,12984238 | 0,00155057 | 0,00423282 |
| AK031098    | chr16 | 43265218  | 43282672  | N/A         | 2,12921751 | 0,01383242 | 0,01913928 |
| BC027554    | chr9  | 114638297 | 114692772 | Cntm8       | 2,12893711 | 0,00176701 | 0,00456051 |
| NM_145457   | chr13 | 120547808 | 120576242 | Paip1       | 2,12846495 | 0,00028045 | 0,00179594 |
| NM_172610   | chr15 | 83607788  | 83686240  | Mpped1      | 2,12835184 | 0,01408468 | 0,01942916 |
| NM_010592   | chr8  | 73627937  | 73629605  | Jund1       | 2,12834693 | 0,00672765 | 0,01095002 |
| NM_013918   | chr16 | 76896660  | 76999372  | Usp25       | 2,12624818 | 0,00108258 | 0,00347212 |
| BC018352    | chr7  | 29895708  | 29903802  | Capns1      | 2,12592397 | 0,00221014 | 0,00516657 |
| XM_128800   | chr17 | 80488840  | 80636419  | Map4k3      | 2,12572259 | 0,00399992 | 0,00766062 |
| AK052692    | chr12 | 79986448  | 80000486  | Plekhh1     | 2,12566365 | 0,00189348 | 0,00475321 |
| NM_018870   | chr11 | 5701646   | 57037736  | Pgam2       | 2,12498109 | 0,00421747 | 0,00789195 |
| BC008238    | chr2  | 84599698  | 84610840  | Ube216      | 2,12492217 | 0,00171566 | 0,00449545 |
| BC011162    | chr15 | 37310852  | 37403932  | Ncald       | 2,12336639 | 0,00843613 | 0,01288825 |
| NM_010587   | chr16 | 91671051  | 91800868  | Itsn1       | 2,12326827 | 0,00503166 | 0,00893885 |
| AK051219    | chr11 | 61063721  | 61083372  | Alhd3a2     | 2,12162057 | 0,01054323 | 0,00539569 |
| BC005601    | chr1  | 38932349  | 38941186  | Pdcl3       | 2,12146371 | 0,00768669 | 0,01207591 |
| NM_009333   | chr19 | 55795517  | 55986492  | Tcf7l2      | 2,12086658 | 0,00555414 | 0,00955113 |
| AK038638    | chr1  | 83144150  | 83287189  | 4930544G21R | 2,12079229 | 0,0077404  | 0,0121379  |
| NM_0103316  | chr8  | 108147703 | 108153723 | Tradd       | 2,1206796  | 0,00802946 | 0,01246983 |
| NM_177727   | chr2  | 179955805 | 179964064 | Lsm14b      | 2,1206012  | 0,00226125 | 0,00523414 |
| BC060052    | chr3  | 90471166  | 90475865  | Slc27a3     | 2,11973904 | 0,01365874 | 0,01896446 |
| NM_019819   | chr11 | 83864239  | 83884552  | Dusp14      | 2,1196166  | 0,01395633 | 0,01927888 |
| AK042994    | chr17 | 86076144  | 86085831  | Prkc2       | 2,11900452 | 0,00415198 | 0,00982368 |
| AK138030    | chr11 | 96280698  | 96575220  | Scap1       | 2,11798641 | 0,00618932 | 0,01030171 |
| AF266508    | chr2  | 24876421  | 24884889  | Nelf        | 2,11795216 | 0,00399936 | 0,00766062 |
| AK129255    | chr7  | 65988464  | 66052738  | Chsy1       | 2,1179179  | 0,00050057 | 0,00234177 |
| BC057545    | chr4  | 45014090  | 45033512  | Zbtb5       | 2,1175705  | 0,00026317 | 0,00174727 |
| AK148157    | chr12 | 35632288  | 35677038  | Snx13       | 2,11743351 | 0,00246127 | 0,00553315 |
| NM_010155   | chr7  | 24951319  | 24959425  | Erf         | 2,11682695 | 0,00211703 | 0,00501981 |
| BC096430    | chr2  | 4635434   | 4717837   | E130319B15R | 2,11676337 | 0,00569444 | 0,00971672 |
| BC052441    | chr5  | 138314907 | 138334279 | Zkscan1     | 2,11623034 | 0,00739872 | 0,01170989 |
| BC094248    | chr7  | 11781385  | 11792017  | Zfp128      | 2,11620101 | 0,00326157 | 0,00662491 |
| NM_175400   | chr2  | 4798835   | 4827829   | Sephs1      | 2,11573656 | 0,00947561 | 0,01413046 |
| NM_011416   | chr19 | 26672256  | 26845418  | Smarca2     | 2,11558013 | 0,00499807 | 0,00889877 |
| NM_007409   | chr3  | 138215031 | 138228078 | Adh1        | 2,11547749 | 0,00916626 | 0,01374824 |
| AK146133    | chr19 | 36474891  | 36521336  | Pcgf5       | 2,11528199 | 0,00458769 | 0,00836392 |
| NM_011542   | chr4  | 135520055 | 135546974 | Tcea3       | 2,11449527 | 0,00920384 | 0,01380114 |
| AK076576    | chr17 | 86406057  | 86413558  | N/A         | 2,11358676 | 0,00395043 | 0,00759511 |
| BC080863    | chr18 | 37099775  | 37312132  | Pcdha7      | 2,11289343 | 0,00431346 | 0,00802648 |
| AK053542    | chr4  | 43422337  | 43448173  | Rusc2       | 2,11121963 | 0,0027652  | 0,00594737 |
| AK088828    | chr15 | 97620723  | 97672303  | Hdac7a      | 2,11111231 | 0,00992739 | 0,01468298 |
| NM_027144   | chr9  | 42714837  | 42856481  | Arhgef12    | 2,11082455 | 0,00020073 | 0,00153024 |
| BC006618    | chr7  | 23999799  | 24008348  | Zfp61       | 2,11013212 | 0,00105129 | 0,0034148  |
| NM_00100994 | chrX  | 32320276  | 32508502  | Dock11      | 2,10935707 | 0,0021177  | 0,00501981 |
| BC050920    | chr6  | 124708164 | 124722106 | Atn1        | 2,10863102 | 0,01022782 | 0,01504151 |
| AK144743    | chr4  | 53735253  | 53784058  | Fcmd        | 2,1079247  | 0,00025149 | 0,00170385 |
| BC003200    | chr17 | 15107486  | 15137001  | 4932442K08R | 2,10734521 | 0,00329589 | 0,00667009 |
| NM_138955   | chr9  | 44024184  | 44039239  | Abcg4       | 2,10661012 | 0,00134522 | 0,00374502 |
| BC007130    | chr1  | 135209849 | 135251580 | Sox13       | 2,10515044 | 0,01020101 | 0,01500949 |
| BC094658    | chr9  | 121966036 | 122018396 | Snrk        | 2,10496562 | 0,00754193 | 0,01189244 |
| NM_027946   | chr11 | 105852961 | 105875414 | Wdr68       | 2,10495102 | 0,00012243 | 0,00128279 |
| NM_019813   | chr13 | 55483408  | 55497790  | Dbn1        | 2,10411954 | 0,0002501  | 0,00170185 |
| AK142210    | chr10 | 12781029  | 12821180  | Plagl1      | 2,10405634 | 0,00271178 | 0,00588557 |
| NM_153565   | chr4  | 105940273 | 105974961 | Pcsk9       | 2,10359455 | 0,01100585 | 0,01594965 |
| NM_030565   | chr5  | 139008741 | 139063705 | BC004044    | 2,10352165 | 0,00011619 | 0,00125214 |
| NM_028915   | chr3  | 14510531  | 14549387  | Lrrcc1      | 2,10205439 | 0,00910738 | 0,01367563 |
| NM_133833   | chr1  | 33956370  | 34253198  | Dst         | 2,10204468 | 0,00262748 | 0,00578046 |
| AF187147    | chr13 | 55483637  | 55497688  | Dbn1        | 2,10172901 | 0,00030334 | 0,00185674 |
| NM_018807   | chr2  | 152919209 | 152932799 | Plagl2      | 2,10151536 | 0,00073188 | 0,00280068 |
| BC019889    | chr6  | 83084702  | 83087043  | Wbp1        | 2,10081628 | 0,0002965  | 0,00183867 |
| BC019187    | chr15 | 90976587  | 91019507  | Abcd2       | 2,10039888 | 0,01106703 | 0,01599554 |
| AY162381    | chr6  | 113604264 | 113659574 | Irak2       | 2,09879317 | 0,0049079  | 0,00879763 |
| BC055012    | chr18 | 24722891  | 24746497  | Slc39a6     | 2,09826467 | 0,00819163 | 0,01262956 |
| NM_013457   | chr5  | 34890668  | 34948472  | Add1        | 2,09821134 | 0,00154385 | 0,00422222 |
| NM_00101381 | chr1  | 87431873  | 87476208  | LOC434484   | 2,09691251 | 0,00036095 | 0,00201118 |
| NM_139227   | chr14 | 12805757  | 12897327  | Atxn7       | 2,09668481 | 0,00052603 | 0,00238658 |
| NM_008349   | chr16 | 91295184  | 91314608  | Ili10rb     | 2,09626339 | 0,00621931 | 0,01033643 |
| NM_130891   | chr10 | 119222571 | 119478657 | Grip1       | 2,09585659 | 0,00124102 | 0,01374691 |
| NM_015800   | chr17 | 78102125  | 78279372  | Crim1       | 2,09476732 | 0,01030674 | 0,01513062 |
| NM_009404   | chr17 | 56790775  | 56792848  | Tnfsf9      | 2,09440919 | 0,00410879 | 0,00778906 |
| BC051457    | chr14 | 63765711  | 63903960  | Hmbox1      | 2,09423983 | 0,00679342 | 0,01100838 |
| NM_177192   | chr6  | 148971157 | 149058708 | D030011O10R | 2,09348029 | 0,00023638 | 0,0016797  |
| AK158415    | chr3  | 144621063 | 144657496 | Sh3glb1     | 2,09114534 | 0,00595301 | 0,01000494 |
| AK135203    | chr14 | 19296443  | 19334939  | Ppp3cb      | 2,09098107 | 0,00055052 | 0,00242028 |
| AK153754    | chr18 | 65020112  | 65026199  | N/A         | 2,09088928 | 0,01177661 | 0,01679717 |

|             |       |           |           |              |            |            |            |
|-------------|-------|-----------|-----------|--------------|------------|------------|------------|
| AK146789    | chr6  | 117806899 | 117811574 | Zfp637       | 2,09040624 | 0,00121696 | 0,00371696 |
| NM_028906   | chr9  | 64830463  | 64880657  | Dpp8         | 2,09039175 | 0,00280912 | 0,00600073 |
| NM_008295   | chr3  | 98747696  | 98774558  | Hsd3b5       | 2,08996676 | 0,00123029 | 0,00374239 |
| NM_025877   | chr17 | 56728620  | 56745010  | Slc25a23     | 2,08871647 | 0,00187188 | 0,00471776 |
| BC004782    | chr1  | 77256289  | 77398151  | Epha4        | 2,08843658 | 0,0005952  | 0,00252747 |
| AF039663    | chr5  | 44281868  | 44389964  | Prom1        | 2,0883256  | 0,01074092 | 0,01564558 |
| NM_175245   | chr14 | 97917683  | 97929214  | 2410129H14R  | 2,08809884 | 0,01035855 | 0,01518334 |
| NM_009551   | chr19 | 21339374  | 21349386  | Za20d2       | 2,08617473 | 0,00273484 | 0,00590684 |
| AK143359    | chr9  | 98759132  | 98764651  | N/A          | 2,08569278 | 0,00028739 | 0,00181894 |
| XM_989682   | chr18 | 52950678  | 52951650  | LOC667308    | 2,08365054 | 0,0131679  | 0,01841591 |
| NM_194342   | chr15 | 79551325  | 79569785  | Unc84b       | 2,0823559  | 0,00162828 | 0,00436307 |
| NM_026743   | chr6  | 127853240 | 127918650 | Tspan11      | 2,0812448  | 0,01230544 | 0,01741396 |
| AB012808    | chr14 | 53860940  | 53867249  | Slc22a17     | 2,07951439 | 0,00704848 | 0,01129044 |
| XM_911254   | chrX  | 118464631 | 118464844 | LOC636009    | 2,07874098 | 0,00486608 | 0,00874106 |
| NM_00103772 | chr1  | 59857551  | 59929892  | Als2cr13     | 2,07844322 | 0,000072   | 0,00289658 |
| BC023007    | chr14 | 55747437  | 55751891  | 9830124H08R  | 2,0775886  | 0,01226794 | 0,01736966 |
| XM_910858   | chr11 | 49974782  | 50016208  | 2700008N14R  | 2,07570775 | 0,00380612 | 0,00738296 |
| NM_009553   | chr7  | 80735620  | 80750027  | Zscan2       | 2,07545358 | 0,00310075 | 0,00639677 |
| BC069848    | chr2  | 43377350  | 43502218  | Kynu         | 2,07495972 | 0,01355893 | 0,01885662 |
| NM_183215   | chr19 | 41646673  | 41649465  | AI606181     | 2,07345011 | 0,0019196  | 0,00479599 |
| XM_897433   | chr9  | 15686590  | 15708215  | Fat3         | 2,07311479 | 0,00845083 | 0,0128991  |
| NM_009179   | chr8  | 113844300 | 113856983 | St3gal2      | 2,07155865 | 0,00130132 | 0,00386187 |
| NM_008492   | chr6  | 142447470 | 142465165 | Ldhd         | 2,07115185 | 0,00704595 | 0,01128942 |
| NM_010117   | chr11 | 32109584  | 32122238  | Rhbdf1       | 2,07061596 | 0,00103041 | 0,00338102 |
| NM_178928   | chr18 | 61855630  | 61912031  | AI173486     | 2,07059204 | 0,00142981 | 0,00405723 |
| AK158994    | chr5  | 139270949 | 139384028 | Prkar1b      | 2,06981238 | 0,00376586 | 0,0073277  |
| BC052164    | chr1  | 77251181  | 77398208  | Epha4        | 2,06956372 | 0,00205849 | 0,00497067 |
| NM_028730   | chr6  | 121149285 | 121161804 | Pex26        | 2,06905692 | 0,00450228 | 0,00825672 |
| NM_134126   | chr17 | 24744322  | 24827086  | Ift140       | 2,06862672 | 0,00053216 | 0,00239637 |
| BC003857    | chr11 | 113542942 | 113567868 | Cdc42ep4     | 2,06840687 | 0,00551584 | 0,00951666 |
| NM_009818   | chr18 | 35244885  | 35380749  | Ctnna1       | 2,06823961 | 0,00215096 | 0,00505479 |
| NM_009968   | chr3  | 154532491 | 154558475 | Cryz         | 2,06773791 | 0,00039803 | 0,00207796 |
| NM_00100417 | chr1  | 78193491  | 78303436  | Sgpp2        | 2,0674274  | 0,00909886 | 0,01366777 |
| NM_008483   | chr9  | 108338048 | 108348632 | Lamb2        | 2,06741307 | 0,00170334 | 0,00447804 |
| AK164161    | chr12 | 35632329  | 35730525  | Snx13        | 2,06660596 | 0,00092689 | 0,0031906  |
| NM_144516   | chr13 | 9685015   | 9764377   | Zmynd11      | 2,06595668 | 0,01239361 | 0,01750964 |
| NM_029413   | chrX  | 135167998 | 135218018 | Morc4        | 2,06573711 | 0,00028303 | 0,00180481 |
| NM_010211   | chrX  | 53078597  | 53140127  | Fhl1         | 2,06478753 | 0,00511252 | 0,00904207 |
| NM_013866   | chr15 | 103141920 | 103168118 | Zfp385       | 2,06475414 | 0,01109715 | 0,01603131 |
| NM_008983   | chr10 | 27764235  | 28285656  | Ptprk        | 2,06323288 | 0,00122085 | 0,01617865 |
| NM_026752   | chr12 | 112262047 | 112276194 | Zfyve21      | 2,06288968 | 0,00291745 | 0,00616943 |
| XM_985316   | chr7  | 16033790  | 16045984  | LOC666671    | 2,06166034 | 0,01140501 | 0,01638016 |
| NM_007688   | chr12 | 55776951  | 55781012  | Cfl2         | 2,06075548 | 0,01239815 | 0,01751191 |
| BC089024    | chr8  | 37568467  | 37616301  | D8Ert82e     | 2,0602318  | 0,00908051 | 0,01364364 |
| BC034871    | chr14 | 33204653  | 33232836  | Mmrn2        | 2,05957976 | 0,0076445  | 0,01202546 |
| NM_008730   | chr11 | 119355461 | 119363915 | Nptx1        | 2,05898502 | 0,0142445  | 0,01959975 |
| NM_181405   | chr1  | 94741810  | 94750986  | Rnpepl1      | 2,05849032 | 0,00313409 | 0,00643976 |
| AK005166    | chr9  | 108641018 | 108655212 | Ihpk2        | 2,05807658 | 0,00798134 | 0,0124124  |
| BC069985    | chr10 | 119765986 | 119879223 | Hmgga2       | 2,05642245 | 0,00141204 | 0,00403794 |
| AY255674    | chr10 | 119396165 | 119490320 | Grip1        | 2,05625141 | 0,00585524 | 0,00990043 |
| AK045875    | chr7  | 74410167  | 74411301  | N/A          | 2,05244467 | 0,0105371  | 0,01539382 |
| BC110308    | chr8  | 124476536 | 124484107 | Map11c3b     | 2,05186621 | 0,00080233 | 0,0029513  |
| NM_198602   | chr5  | 136532761 | 136851867 | Cutl1        | 2,05095618 | 0,01087267 | 0,01579119 |
| BC016215    | chr3  | 95761608  | 95765081  | Adamtsl4     | 2,04990445 | 0,0017217  | 0,00449618 |
| BC026578    | chr2  | 126584680 | 126624484 | 2010106G01R  | 2,04919887 | 0,00537517 | 0,00935126 |
| NM_011379   | chr19 | 5651193   | 5663620   | Sipa1        | 2,04901896 | 3,22E-05   | 0,00083399 |
| AK155105    | chr11 | 6328146   | 6344448   | H2afv        | 2,04821903 | 0,00158984 | 0,00430088 |
| AK036468    | chr7  | 123070365 | 123160999 | Arhgap17     | 2,04742887 | 0,00775722 | 0,01215468 |
| BC024362    | chr3  | 144628453 | 144657531 | Sh3glb1      | 2,0471356  | 4,62E-05   | 0,000913   |
| AK141217    | chr7  | 6311423   | 6334505   | Peg3         | 2,04702208 | 3,48E-05   | 0,00083399 |
| BC021627    | chr10 | 127536178 | 127579388 | Rbms2        | 2,04570294 | 0,00100871 | 0,00336247 |
| NM_00102558 | chr10 | 111675232 | 111870414 | Kcnc2        | 2,04565095 | 0,01131264 | 0,01627346 |
| BC006583    | chr6  | 29349598  | 29376962  | 4921511K06R  | 2,04512166 | 0,0145075  | 0,01992024 |
| NM_007735   | chr1  | 82331581  | 82465816  | Col4a4       | 2,04480037 | 0,01324628 | 0,01850382 |
| NM_008678   | chr1  | 13127688  | 13359278  | Ncoa2        | 2,04469643 | 0,00089294 | 0,00311509 |
| NM_008512   | chr10 | 126941136 | 127024078 | Lrp1         | 2,0446114  | 0,0022234  | 0,0051794  |
| BC067048    | chr17 | 3283054   | 3475460   | Tiam2        | 2,04405403 | 0,00121399 | 0,0037101  |
| NM_176860   | chr9  | 40764709  | 40908563  | 2810457I06Ri | 2,04345433 | 0,00250736 | 0,00560302 |
| NM_009204   | chr11 | 69758737  | 69764329  | Slc2a4       | 2,04205728 | 0,00159786 | 0,00431842 |
| NM_008801   | chr1  | 88374185  | 88413672  | Pde6d        | 2,04052445 | 0,00285115 | 0,00606462 |
| BC079600    | chr17 | 3283165   | 3475465   | Tiam2        | 2,04039245 | 0,00612844 | 0,01022321 |
| NM_173745   | chr11 | 3795283   | 3801299   | Dusp18       | 2,03917181 | 0,0081907  | 0,01262956 |
| AK021284    | chr5  | 22946264  | 22998224  | Mil5         | 2,03897865 | 0,00034124 | 0,00195919 |
| NM_011439   | chr1  | 135209848 | 135220764 | Sox13        | 2,03889856 | 0,00943476 | 0,01407658 |
| NM_00103713 | chr1  | 91285981  | 91726453  | Centg2       | 2,03760819 | 0,01153803 | 0,01651705 |
| NM_028455   | chr15 | 84547867  | 84599967  | 3110043J09Ri | 2,03701509 | 0,00423334 | 0,00791197 |

|             |       |           |           |             |            |            |            |
|-------------|-------|-----------|-----------|-------------|------------|------------|------------|
| NM_027409   | chrX  | 49589647  | 49615119  | Mospd1      | 2,03597051 | 0,01315663 | 0,01841591 |
| BC028847    | chr17 | 35505652  | 35518100  | 2610110G12R | 2,03508163 | 0,00704548 | 0,01128942 |
| NM_144897   | chr3  | 88142449  | 88144422  | Apoa1bp     | 2,03424014 | 0,00870801 | 0,01320275 |
| NM_009750   | chrX  | 131616706 | 131618330 | Ngfrap1     | 2,03330504 | 0,0011681  | 0,00363477 |
| BC017644    | chr15 | 103141928 | 103162361 | Zfp385      | 2,03281651 | 0,01203938 | 0,01708611 |
| BC113141    | chr19 | 41327585  | 41438340  | Pik3ap1     | 2,03213559 | 0,00048548 | 0,00231561 |
| NM_028117   | chr2  | 118617964 | 118620026 | D4st1       | 2,03198065 | 0,00240327 | 0,00544332 |
| BC056953    | chr7  | 140792938 | 140798978 | Athl1       | 2,03195249 | 0,00494179 | 0,00883447 |
| NM_020333   | chr2  | 164659523 | 164690936 | Slc12a5     | 2,03124839 | 0,0075523  | 0,01190556 |
| NM_011351   | chr3  | 95249777  | 95258720  | Sema6c      | 2,03115922 | 0,0024006  | 0,00544196 |
| NM_009561   | chr7  | 23999805  | 24008350  | Zfp61       | 2,0304507  | 0,00016453 | 0,00142787 |
| NM_144529   | chr7  | 123070418 | 123161030 | Arhgap17    | 2,02996755 | 0,00140659 | 0,00402982 |
| NM_207212   | chr7  | 33818306  | 33842028  | Wtip        | 2,02890315 | 0,0020713  | 0,00498349 |
| AK172999    | chr11 | 49974842  | 50015448  | 2700008N14R | 2,02836413 | 0,00280014 | 0,00599711 |
| NM_025378   | chr7  | 140860909 | 140862064 | Ifitm3      | 2,02661681 | 0,00052885 | 0,00239043 |
| BC007129    | chr11 | 3244460   | 3309160   | Limk2       | 2,02618139 | 0,00058692 | 0,0025156  |
| NM_017391   | chr16 | 91965915  | 91968072  | Slc5a3      | 2,02544653 | 0,00181312 | 0,00463459 |
| NM_023734   | chr17 | 29046244  | 29056425  | Pi16        | 2,02544185 | 0,00026817 | 0,00175615 |
| NM_008561   | chr2  | 171939696 | 171942319 | Mc3r        | 2,02445934 | 0,00053606 | 0,00240124 |
| XM_194358   | chr7  | 65988464  | 66052748  | Ses3        | 2,02427693 | 0,00396606 | 0,0076178  |
| NM_145387   | chr7  | 140792900 | 140798978 | Athl1       | 2,02336978 | 0,00275191 | 0,00593247 |
| NM_153068   | chr7  | 15107508  | 15126057  | Ehd2        | 2,02298179 | 0,00194348 | 0,00483397 |
| NM_178647   | chr16 | 64794286  | 64801693  | Cggbp1      | 2,02292103 | 0,00402249 | 0,0076841  |
| NM_130261   | chr9  | 14026801  | 14076531  | Sgn3        | 2,02228547 | 0,00489783 | 0,00878486 |
| NM_00103922 | chr8  | 38462098  | 38463251  | AI429214    | 2,02084219 | 0,00398232 | 0,00764411 |
| NM_007874   | chr18 | 34469685  | 34498130  | Reep5       | 2,02056673 | 0,00288875 | 0,00612038 |
| AK029836    | chr9  | 59692812  | 59726862  | Myo9a       | 2,02046403 | 0,00949948 | 0,01415543 |
| BC062101    | chr4  | 135444761 | 135466790 | E2f2        | 2,02017929 | 0,01064253 | 0,01551363 |
| AK014718    | chr4  | 48146014  | 48207011  | Stx17       | 2,02010927 | 0,00113301 | 0,00356801 |
| NM_020010   | chr5  | 4086679   | 4110703   | Cyp51       | 2,01983858 | 0,00580951 | 0,00983149 |
| AK144581    | chr10 | 80978415  | 80993602  | Tle2        | 2,01972658 | 0,00077558 | 0,00290416 |
| BC005642    | chr18 | 33327806  | 33338627  | Stard4      | 2,01939061 | 0,00156097 | 0,00425343 |
| BC023805    | chr2  | 150098586 | 150142927 | N/A         | 2,01925065 | 0,00894434 | 0,01348664 |
| NM_0010018E | chr1  | 167428914 | 167471196 | Mpz1        | 2,01904538 | 0,00031085 | 0,00186879 |
| XM_900280   | chr1  | 181960440 | 182002443 | Cdc42bpa    | 2,01842036 | 0,00078697 | 0,00292695 |
| AK220556    | chr5  | 138371561 | 138385532 | Zfp113      | 2,01766035 | 0,00230679 | 0,00529984 |
| NM_010878   | chr9  | 100304354 | 100355405 | Nck1        | 2,01699849 | 0,00089241 | 0,00311507 |
| BC037664    | chr2  | 152919864 | 152932798 | Plagl2      | 2,01562884 | 0,0094818  | 0,01413615 |
| NM_021350   | chr1  | 177523162 | 177525028 | Chml        | 2,01561486 | 0,0051846  | 0,00911548 |
| NM_016797   | chr10 | 23838775  | 23878375  | Stx7        | 2,01464177 | 0,00329761 | 0,0066713  |
| NM_172469   | chr16 | 92387005  | 92430100  | Clic6       | 2,01431596 | 0,00059431 | 0,00252703 |
| NM_153088   | chr1  | 74324805  | 74330492  | Ctdsp1      | 2,01285977 | 0,00080346 | 0,0029513  |
| NM_178057   | chr10 | 119764720 | 119879324 | Hmga2       | 2,01264585 | 0,00173126 | 0,00450339 |
| NM_008990   | chr7  | 18875182  | 18907991  | Pvr12       | 2,01225527 | 0,01194348 | 0,01697956 |
| NM_201354   | chr18 | 75556569  | 75822919  | Grm672      | 2,0115487  | 0,00678236 | 0,01100407 |
| NM_007778   | chr3  | 107869115 | 107888525 | Csf1        | 2,01135351 | 0,00627538 | 0,01040139 |
| AK162697    | chr13 | 55483638  | 55497683  | Dbn1        | 2,01119551 | 0,00146821 | 0,00411346 |
| BC072632    | chr10 | 118857093 | 119490320 | Grip1       | 2,01112116 | 0,00337127 | 0,00675613 |
| AK165759    | chr9  | 119206284 | 119242495 | Xylb        | 2,01086096 | 0,0082265  | 0,01266587 |
| NM_175364   | chr4  | 33128877  | 33130863  | 2610208E05R | 2,01041499 | 0,01055618 | 0,01540447 |
| AK170217    | chr11 | 115988690 | 115997101 | Acox1       | 2,00937013 | 0,00061627 | 0,00252683 |
| NM_177892   | chr7  | 61973455  | 62088429  | A230097C02  | 2,00898018 | 0,00394243 | 0,00758218 |
| NM_008215   | chr17 | 17547940  | 17559804  | Hsp3        | 2,0082098  | 0,00267197 | 0,00584169 |
| NM_009155   | chr15 | 3220995   | 3230508   | Sepp1       | 2,00782936 | 0,01456898 | 0,01999085 |
| BC048901    | chr11 | 49868770  | 49948146  | Rnf130      | 2,00757423 | 0,00065868 | 0,00266798 |
| BC024448    | chr1  | 135137345 | 135149488 | Golt1a      | 2,00756959 | 0,00401612 | 0,00767931 |
| NM_00103964 | chr1  | 153517591 | 153584269 | Edem3       | 2,00724029 | 0,00679578 | 0,01100838 |
| BC094247    | chr9  | 45615826  | 45657357  | D130054N24R | 2,00714754 | 0,00079557 | 0,00294061 |
| BC089335    | chr2  | 13492167  | 13500671  | Vim         | 2,00563165 | 0,01118225 | 0,01614251 |
| BC052502    | chr11 | 69694459  | 69696419  | Kctd11      | 2,00562238 | 0,00049667 | 0,0023374  |
| NM_172593   | chr13 | 112807228 | 112838514 | Mier3       | 2,00539533 | 0,00442123 | 0,00816839 |
| NM_009684   | chr10 | 90420400  | 90512501  | Apaf1       | 2,00437623 | 0,00410199 | 0,00778113 |
| NM_139140   | chr15 | 98954878  | 99040500  | Spats2      | 2,00327433 | 8,36E-05   | 0,00112072 |
| NM_053254   | chr10 | 80994033  | 81004029  | Tle6        | 2,00318176 | 0,01387227 | 0,01918053 |
| AY682987    | chr15 | 79552699  | 79567100  | Unc84b      | 2,00258942 | 0,00531322 | 0,00927597 |
| AK028873    | chr9  | 59692280  | 59724362  | Myo9a       | 2,0020759  | 0,00021715 | 0,00159834 |
| NM_199018   | chrX  | 95245383  | 95277447  | Stard8      | 2,00192788 | 0,00183944 | 0,00467466 |
| BC027815    | chrX  | 131616711 | 131618283 | Ngfrap1     | 2,00192325 | 0,00098993 | 0,00332851 |
| NM_0010087C | chr7  | 125343386 | 125369113 | Il4ra       | 2,0011001  | 0,00575353 | 0,00976812 |
| NM_009303   | chr15 | 79918588  | 79940695  | Syngn1      | 0,49975399 | 0,00013906 | 0,00134116 |
| XM_901168   | chr18 | 42328270  | 42341002  | Lars        | 0,49962469 | 0,01231656 | 0,01742144 |
| NM_0010349C | chr6  | 147032231 | 147044202 | LOC545893   | 0,49961083 | 0,00496443 | 0,00885634 |
| NM_027567   | chr1  | 123258640 | 123277297 | Ccdc93      | 0,49945041 | 0,00037874 | 0,00204961 |
| BC058242    | chr16 | 59414121  | 59434549  | Mina        | 0,49918852 | 0,00014014 | 0,00134116 |
| AK168445    | chr16 | 91522263  | 91535784  | Gart        | 0,49892793 | 0,00081743 | 0,00297684 |
| NM_009996   | chr2  | 170174169 | 170188343 | Cyp24a1     | 0,49872854 | 0,00987624 | 0,01462183 |

|             |       |           |           |             |            |            |            |
|-------------|-------|-----------|-----------|-------------|------------|------------|------------|
| BC110633    | chr7  | 30132103  | 30137359  | AY078069    | 0,4980595  | 0,0093866  | 0,01402228 |
| NM_153065   | chr2  | 166706517 | 166717018 | Ddx27       | 0,49776844 | 0,00352905 | 0,00697525 |
| NM_026421   | chr5  | 100280315 | 100309064 | 2310057D15R | 0,49770749 | 0,00271298 | 0,00588602 |
| NM_007438   | chr7  | 126586383 | 126590331 | Aldoa5      | 0,49750629 | 0,00053306 | 0,00239637 |
| XM_900460   | chr1  | 54593641  | 54870903  | Ankrd44     | 0,4973925  | 0,01142048 | 0,01638328 |
| NM_013658   | chr3  | 88521885  | 88541606  | Sema4a      | 0,49733275 | 0,01267411 | 0,01784199 |
| BC052168    | chr4  | 122814955 | 122845555 | Bmp8a       | 0,49729598 | 0,00686911 | 0,01108653 |
| AF331457    | chr7  | 28843692  | 28860375  | Rasgrp4     | 0,49729368 | 0,00071595 | 0,00278211 |
| NM_022324   | chr16 | 17043700  | 17045928  | Sdf2l1      | 0,49723164 | 0,00912396 | 0,01369513 |
| XM_00100293 | chr7  | 118646923 | 118766352 | LOC668373   | 0,4970513  | 0,00200907 | 0,00492053 |
| BC096651    | chr1  | 60022240  | 60042189  | Wdr12       | 0,49693877 | 0,00061943 | 0,00257715 |
| NM_008826   | chr10 | 77390399  | 77412878  | Pfkl        | 0,49683659 | 5,29E-06   | 0,00053609 |
| NM_016871   | chr7  | 18859839  | 18873778  | Tom40       | 0,49673558 | 0,00050707 | 0,00234535 |
| AK156765    | chr8  | 96926358  | 96956148  | Ogfod1      | 0,49668279 | 0,0003021  | 0,00185674 |
| NM_011923   | chr2  | 33038077  | 33068447  | Angptl2     | 0,49624346 | 0,00284645 | 0,00606091 |
| BC004829    | chr11 | 117625773 | 117630371 | Syngn2      | 0,49619875 | 6,75E-05   | 0,00103692 |
| NM_173757   | chr13 | 100444942 | 100515718 | Mrps27      | 0,49606119 | 0,00600258 | 0,01006677 |
| NM_183370   | chr17 | 6555487   | 6587494   | Sytl3       | 0,49589159 | 0,00812973 | 0,01258417 |
| NM_008422   | chr7  | 44459161  | 44464606  | Kcnc3       | 0,49585951 | 0,00110961 | 0,00352827 |
| NM_133880   | chr4  | 133669544 | 133699484 | Pafah2      | 0,49584347 | 0,01288231 | 0,00053609 |
| BC023933    | chr15 | 81491224  | 81515563  | L3mbtl2     | 0,49583774 | 0,00327136 | 0,0066363  |
| NM_00103722 | chr14 | 45804843  | 46024079  | Samd4       | 0,49564761 | 0,01202357 | 0,01707106 |
| BC026812    | chr3  | 129870662 | 129887323 | Pla2g12a    | 0,49546555 | 0,00708341 | 0,01133421 |
| BC108378    | chr3  | 94845475  | 94871859  | Cgn         | 0,49546327 | 0,01135953 | 0,01632727 |
| AY219715    | chr2  | 11623663  | 11651254  | Il15ra      | 0,49538428 | 0,00356454 | 0,00703236 |
| AK081256    | chr12 | 101180135 | 101298030 | 9030617O03R | 0,49535224 | 0,00187348 | 0,00471776 |
| NM_029341   | chr15 | 9380752   | 9410760   | Capsl       | 0,49533965 | 0,0084394  | 0,01288825 |
| XM_141763   | chrX  | 53755932  | 53835557  | Gm364       | 0,49512682 | 0,002119   | 0,00501981 |
| AK152524    | chr7  | 88153329  | 88166582  | Ctsc        | 0,49498041 | 0,00098853 | 0,00332851 |
| AK144472    | chr7  | 16194010  | 16209260  | Hif3a       | 0,49496897 | 0,01133152 | 0,01629094 |
| NM_030713   | chr9  | 39942896  | 39963760  | Zfp202      | 0,49490494 | 0,01248916 | 0,01762792 |
| AK044550    | chr17 | 84334549  | 84374534  | Thada       | 0,49481347 | 0,00037877 | 0,00204961 |
| NM_009648   | chr11 | 88647759  | 88667593  | Akap1       | 0,49478146 | 0,00051414 | 0,0023543  |
| BC004748    | chr1  | 60022688  | 60042720  | Wdr12       | 0,49457572 | 0,00135822 | 0,00395976 |
| NM_144835   | chr13 | 12449707  | 12493226  | Heatr1      | 0,49446375 | 0,0027275  | 0,00590684 |
| NM_172117   | chr2  | 150440589 | 150463114 | Entpd6      | 0,49421819 | 0,00070716 | 0,0027774  |
| NM_133914   | chr5  | 136368542 | 136396483 | Rasa4       | 0,49402639 | 0,00288405 | 0,00611322 |
| AK036145    | chr11 | 77728321  | 77745483  | N/A         | 0,49385748 | 0,01185528 | 0,0168811  |
| BC049647    | chr10 | 128151470 | 128169508 | Wibg        | 0,49379701 | 0,00047057 | 0,00229116 |
| AK079342    | chr11 | 118099884 | 118106162 | Usp36       | 0,49376605 | 0,00252336 | 0,00563115 |
| NM_007853   | chr1  | 184112444 | 184119434 | Degs1       | 0,49368749 | 0,00165598 | 0,00440757 |
| XM_992141   | chr9  | 44125735  | 44130072  | LOC667744   | 0,4930799  | 0,00503005 | 0,00893865 |
| AK015714    | chr17 | 8131539   | 8149226   | 4930506C21R | 0,49306736 | 0,00409059 | 0,00776216 |
| BC019565    | chr11 | 120300760 | 120304843 | Mrpl12      | 0,49306167 | 0,00375708 | 0,007313   |
| NM_023142   | chr5  | 145367856 | 145381713 | Apc1b       | 0,49296598 | 0,00413033 | 0,00779519 |
| NM_153104   | chr11 | 95635277  | 95647394  | Phospho1    | 0,49268815 | 0,00430159 | 0,00801154 |
| NM_009634   | chr15 | 80775773  | 80796628  | Adsl        | 0,49239568 | 0,00415704 | 0,007825   |
| NM_023893   | chr17 | 34634032  | 34635972  | Ng23        | 0,49225121 | 0,00973109 | 0,01444281 |
| NM_019705   | chr2  | 152007777 | 152024076 | AL033326    | 0,4920454  | 0,00132373 | 0,00389926 |
| AK030598    | chr5  | 93083022  | 93117872  | Cdkl2       | 0,49153635 | 0,00248056 | 0,00556401 |
| AK090202    | chr9  | 48225457  | 48232580  | Rexo2       | 0,49146367 | 0,0020542  | 0,00497067 |
| AB047546    | chr10 | 3495968   | 3557880   | Oprm1       | 0,49137056 | 0,00415686 | 0,007825   |
| NM_013659   | chr7  | 80072037  | 80099907  | Sema4b      | 0,49124456 | 2,06E-05   | 0,00069309 |
| AF273687    | chr2  | 143677303 | 143702619 | Rrbp1       | 0,49078169 | 0,00604965 | 0,01012624 |
| NM_007858   | chr18 | 37970797  | 38061385  | Diap1       | 0,49076015 | 0,00129231 | 0,00384063 |
| NM_010075   | chr5  | 27148143  | 28057245  | Dpp6        | 0,49074881 | 0,00099038 | 0,00332851 |
| NM_021391   | chr15 | 103358312 | 103365995 | Fut2        | 0,49045749 | 0,01004803 | 0,01484039 |
| U95145      | chr11 | 88647761  | 88667589  | Akap1       | 0,49027508 | 0,00930754 | 0,01392588 |
| AK042958    | chr12 | 77174236  | 77238641  | Mthfd1      | 0,49013463 | 8,83E-05   | 0,00112072 |
| XM_00100479 | chr12 | 20664171  | 20665155  | LOC668455   | 0,48999197 | 0,00710806 | 0,01135538 |
| NM_018876   | chr7  | 45516636  | 45534350  | Fut2        | 0,48984481 | 0,00829513 | 0,01272987 |
| XM_287936   | chr9  | 91996706  | 92054400  | LOC331000   | 0,48932334 | 0,00876334 | 0,01326041 |
| XM_622097   | chr2  | 143638835 | 143756631 | Rrbp1       | 0,48882614 | 0,00641058 | 0,01055798 |
| NM_007728   | chr12 | 52515074  | 52527393  | Coch        | 0,48872563 | 0,0007181  | 0,00278211 |
| XM_901594   | chr19 | 42800415  | 42806086  | 4833409A17R | 0,48868046 | 0,014235   | 0,0195912  |
| NM_00103386 | chr11 | 29445841  | 29448040  | Rps27a      | 0,48834524 | 0,00523088 | 0,0091698  |
| NM_008423   | chrX  | 6980801   | 6993462   | Kcnd1       | 0,48827529 | 0,00063689 | 0,00261872 |
| AK054210    | chr4  | 146384017 | 146387300 | N/A         | 0,48824144 | 0,00754198 | 0,01189244 |
| NM_009304   | chr11 | 117625770 | 117630371 | Syngn2      | 0,48808692 | 0,00185743 | 0,00469238 |
| BC031452    | chr2  | 143677303 | 143702686 | Rrbp1       | 0,48803167 | 0,00345064 | 0,00685225 |
| BC065093    | chr7  | 35295036  | 35347986  | Ankrd27     | 0,4880001  | 0,00082283 | 0,00297684 |
| NM_175303   | chr2  | 168440990 | 168458333 | Sall4       | 0,48769576 | 0,01238101 | 0,01749599 |
| BC022223    | chr4  | 41221745  | 41234119  | Aqp7        | 0,48764618 | 0,0014963  | 0,0041547  |
| NM_177388   | chr10 | 82660937  | 82767616  | Slc41a2     | 0,48761126 | 0,00785979 | 0,01228955 |
| NM_023633   | chr12 | 84840417  | 84842694  | 2410016O06R | 0,48751776 | 0,00721705 | 0,01148028 |
| XM_148894   | chr19 | 6094418   | 6098241   | Gm550       | 0,486884   | 0,00179655 | 0,0046053  |

|             |       |           |           |              |            |            |            |
|-------------|-------|-----------|-----------|--------------|------------|------------|------------|
| BC096680    | chr6  | 48605744  | 48608284  | Gimap9       | 0,48680414 | 0,00695776 | 0,01119023 |
| NM_024188   | chr15 | 3976748   | 4104101   | Oxct1        | 0,48678952 | 0,00502948 | 0,00893865 |
| NM_028137   | chr4  | 48561598  | 48583019  | 5730528L13Ri | 0,48677602 | 0,00754133 | 0,01189244 |
| NM_178793   | chr18 | 66186266  | 66417201  | Ccbe1        | 0,48657024 | 0,0138074  | 0,01912188 |
| BC086674    | chr3  | 53552187  | 53569684  | 2810046L04Ri | 0,48642749 | 0,00210183 | 0,00501057 |
| NM_009038   | chr11 | 67503491  | 67519528  | Rcvrn        | 0,48593211 | 0,00588487 | 0,0099196  |
| XM_146812   | chr9  | 14804010  | 14862497  | Heph11       | 0,48585689 | 0,00391367 | 0,00754043 |
| NM_894878   | chr12 | 115691977 | 115742332 | LOC629936    | 0,48576036 | 0,0012392  | 0,00374691 |
| NM_00103776 | chr2  | 29912952  | 29915644  | Zdhhc12      | 0,48555614 | 0,00144221 | 0,00406944 |
| NM_012029   | chr9  | 21822647  | 21835784  | Sitpec       | 0,48551687 | 0,00405564 | 0,00771775 |
| BC038887    | chr7  | 18859837  | 18873781  | Tomm40       | 0,48498432 | 0,00302839 | 0,00630862 |
| XM_356185   | chr9  | 106372673 | 106374105 | Iqcf5        | 0,48436952 | 0,00820803 | 0,01264831 |
| BC084683    | chr6  | 69156430  | 69157001  | N/A          | 0,48421847 | 0,00317656 | 0,00650584 |
| NM_080448   | chr6  | 112687746 | 112795398 | Srgap3       | 0,48405851 | 0,00033404 | 0,0019437  |
| NM_146250   | chr1  | 63116966  | 63148485  | Mtrf1        | 0,4840216  | 0,00439728 | 0,00813674 |
| NM_172308   | chr10 | 6190429   | 6374323   | Gprhd11      | 0,48385835 | 0,00238249 | 0,00541532 |
| NM_009936   | chr2  | 180527651 | 180551593 | Col9a3       | 0,48385388 | 0,01065986 | 0,0155351  |
| NM_177568   | chr2  | 118398957 | 118419879 | Plcb2        | 0,48319251 | 0,00681918 | 0,01102683 |
| AK051458    | chr18 | 25622482  | 25896712  | Brunol4      | 0,48314228 | 0,00634436 | 0,01047787 |
| NM_011517   | chr10 | 87889385  | 87903034  | Sycp5        | 0,48296593 | 0,00131783 | 0,01264831 |
| AK005615    | chr19 | 3913492   | 3918702   | Aldh3b1      | 0,48285101 | 0,00255542 | 0,00567851 |
| NM_00101435 | chr4  | 146387802 | 146428995 | LOC433804    | 0,48280973 | 0,01104178 | 0,01597067 |
| NM_008577   | chr19 | 8773926   | 8780919   | Slc3a2       | 0,48265359 | 0,00073406 | 0,00280721 |
| AK054009    | chr5  | 44050559  | 44070366  | Fbxl5        | 0,48239828 | 0,00245331 | 0,00552157 |
| XM_109772   | chr11 | 104908308 | 104933627 | 4921510J17Ri | 0,48235036 | 0,0095177  | 0,01417549 |
| NM_015810   | chr11 | 106584395 | 106595532 | Polg2        | 0,48219101 | 0,00833983 | 0,01277873 |
| XM_900266   | chr3  | 108054143 | 108059635 | Gstm7        | 0,4821899  | 0,00601454 | 0,01008399 |
| NM_146174   | chr6  | 42552649  | 42574648  | BC011487     | 0,48205734 | 0,00529547 | 0,00925853 |
| BC034358    | chr7  | 25367989  | 25376791  | Exosc5       | 0,48190032 | 0,00156988 | 0,00426991 |
| AK172609    | chr11 | 57461658  | 57542819  | Galnt10      | 0,48187917 | 0,00046743 | 0,00228602 |
| NM_026159   | chr6  | 72528136  | 72536997  | Retsat       | 0,48163874 | 0,00502292 | 0,00893129 |
| NM_010324   | chr19 | 43553065  | 43577820  | Got1         | 0,4813595  | 0,00107801 | 0,00346662 |
| NM_138595   | chr19 | 30164443  | 30241415  | Gldc         | 0,48132502 | 0,00108913 | 0,00348733 |
| NM_080419   | chr1  | 174149081 | 174156512 | Igsf8        | 0,48119493 | 0,00055635 | 0,00243177 |
| NM_029948   | chr4  | 143658360 | 143675151 | 4930569K13R  | 0,48108709 | 0,00120805 | 0,00370684 |
| AK171976    | chr15 | 34027315  | 34028895  | Mtdh         | 0,48100929 | 0,00595965 | 0,01001167 |
| NM_130458   | chr15 | 102184643 | 102194367 | Sp7          | 0,48048057 | 0,01421923 | 0,01957853 |
| NM_013646   | chr9  | 68452965  | 69178195  | Rora         | 0,48041397 | 0,00273467 | 0,00590684 |
| NM_177869   | chr5  | 20936887  | 20993854  | A1847670     | 0,48040398 | 0,00552174 | 0,00952013 |
| NM_008960   | chr19 | 32823573  | 32892157  | Pten         | 0,48032851 | 0,00838053 | 0,01281803 |
| AK043155    | chr16 | 98155783  | 98236466  | LOC633265    | 0,48020201 | 0,00304578 | 0,00632764 |
| AK146428    | chr14 | 59738691  | 59857720  | Mipep        | 0,48007221 | 0,00065525 | 0,00266481 |
| AK141695    | chr19 | 10276349  | 10307793  | Gm98         | 0,47995798 | 0,0053926  | 0,00937337 |
| BC024803    | chr11 | 5871584   | 5965566   | Camk2b       | 0,47960436 | 0,00791547 | 0,01234791 |
| NM_030255   | chr15 | 79719712  | 79735341  | Apobec3      | 0,47947694 | 0,00987428 | 0,01462183 |
| AK043722    | chr11 | 121443357 | 121489243 | 6030413G23R  | 0,47922664 | 0,00742757 | 0,01174932 |
| AK132509    | chr6  | 124686325 | 124704244 | Ptpn6        | 0,47921667 | 0,00404097 | 0,00770706 |
| NM_009200   | chr10 | 78183630  | 78217894  | Slc1a6       | 0,47900413 | 0,00583106 | 0,00986514 |
| BC034099    | chr4  | 116317836 | 116319255 | Glox1d       | 0,47890785 | 0,01210931 | 0,01717131 |
| NM_009806   | chrX  | 12678005  | 13003515  | Cask         | 0,47870319 | 0,00279727 | 0,00599688 |
| NM_011026   | chr5  | 122968239 | 122989661 | P2rx4        | 0,47870319 | 0,00220304 | 0,00515697 |
| NM_025837   | chr9  | 57342404  | 57350889  | Mpi1         | 0,47867223 | 0,00025434 | 0,00171473 |
| BC016264    | chr15 | 76366137  | 76368643  | Gpr172b      | 0,47861251 | 0,00399108 | 0,00765554 |
| NM_175363   | chr15 | 93226537  | 93317594  | Pphln1       | 0,47854395 | 0,00013226 | 0,00133144 |
| NM_020491   | chr19 | 5730305   | 5731721   | Sssca1       | 0,47831955 | 0,00824193 | 0,01268087 |
| BC058188    | chr16 | 55737392  | 55747073  | Nfkbiz       | 0,47825325 | 0,00508379 | 0,00900729 |
| NM_026316   | chr19 | 3913490   | 3929716   | Aldh3b1      | 0,47825214 | 0,00209928 | 0,00501037 |
| NM_027982   | chr3  | 104909111 | 104914004 | Ppm1j        | 0,47815491 | 0,00101348 | 0,00336247 |
| BC110358    | chr14 | 59738697  | 59857720  | Mipep        | 0,47813171 | 0,00020004 | 0,00153001 |
| NM_028057   | chr1  | 136222400 | 136228149 | Cyb5r1       | 0,47799585 | 0,01025318 | 0,01507137 |
| NM_177096   | chr19 | 32872542  | 32875088  | B430203M17R  | 0,47797487 | 0,00213261 | 0,00502753 |
| NM_00103343 | chr11 | 106567357 | 106583658 | Gm885        | 0,47747817 | 0,0010213  | 0,00337061 |
| XM_900451   | chr4  | 133354387 | 133364580 | Aim1l        | 0,47707236 | 0,00126625 | 0,00380307 |
| XM_993407   | chr8  | 85639539  | 85645157  | LOC666289    | 0,47706023 | 0,00064194 | 0,00263563 |
| NM_009701   | chr15 | 99418813  | 99422856  | Aqp5         | 0,47687509 | 0,00836431 | 0,01280308 |
| AY512949    | chr4  | 104026332 | 104035957 | N/A          | 0,47672967 | 0,01253618 | 0,0176746  |
| NM_172632   | chr18 | 74053857  | 74190298  | Mapk4        | 0,476581   | 0,00151749 | 0,00418958 |
| NM_144867   | chr18 | 67590217  | 67605950  | BC019561     | 0,47653585 | 0,00265991 | 0,00582814 |
| BC003854    | chr11 | 95889078  | 95891694  | Atp5g1       | 0,47639164 | 0,00555111 | 0,00954868 |
| XM_00100665 | chrX  | 10468949  | 10469267  | LOC547160    | 0,4763113  | 0,00993107 | 0,01468478 |
| AK171364    | chr5  | 145367821 | 145381710 | Arpc1b       | 0,47625957 | 0,00083931 | 0,00300566 |
| BC095967    | chr1  | 51414034  | 51422610  | 5830411E10R  | 0,47619686 | 0,00535922 | 0,00933714 |
| XM_134931   | chr9  | 57341788  | 57350900  | Mpi1         | 0,47616825 | 0,00265825 | 0,00582814 |
| NM_019429   | chr13 | 22009640  | 22017206  | Prss16       | 0,47616275 | 0,00780313 | 0,01221698 |
| NM_00103772 | chr8  | 91179180  | 91218793  | Adcy7        | 0,47605275 | 0,00715807 | 0,0114108  |
| NM_00103335 | chr4  | 150852690 | 150861477 | Klhl21       | 0,47603515 | 0,01103364 | 0,01596659 |

|             |       |           |           |              |            |            |            |
|-------------|-------|-----------|-----------|--------------|------------|------------|------------|
| NM_010699   | chr7  | 46715254  | 46723668  | Ldha         | 0,47599005 | 0,00578904 | 0,00980518 |
| XM_899131   | chr4  | 116563447 | 116571296 | Eif2b3       | 0,47579653 | 0,00645904 | 0,01061726 |
| BC027342    | chr2  | 24861514  | 24876066  | BC3027342    | 0,47563826 | 0,00126063 | 0,00379397 |
| NM_175351   | chr17 | 45905636  | 45907556  | C330008L01Ri | 0,4751857  | 0,01360874 | 0,01891266 |
| BC002000    | chr4  | 41927006  | 41929819  | Oprs1        | 0,47511105 | 0,00792525 | 0,0123531  |
| AF357239    | chr8  | 73772913  | 73785956  | Kcnn1        | 0,47491789 | 0,00033825 | 0,00194858 |
| NM_018731   | chr7  | 30421111  | 30433944  | Atp4a        | 0,47483011 | 0,00268388 | 0,00586521 |
| AK171783    | chr5  | 44046133  | 44070385  | Fbxl5        | 0,47482024 | 6,22E-05   | 0,00102496 |
| BC071216    | chr1  | 158491696 | 158510997 | Tor3a        | 0,47477526 | 0,0043698  | 0,0081035  |
| NM_00102446 | chr6  | 144956318 | 145005971 | Bcat1        | 0,47470945 | 0,01043784 | 0,01527234 |
| AK156568    | chr6  | 125097555 | 125110371 | Nol1         | 0,47451864 | 0,00470905 | 0,00854132 |
| BC002057    | chr19 | 43553065  | 43577804  | Got1         | 0,47450658 | 0,00119693 | 0,00368768 |
| NM_013865   | chr2  | 156618785 | 156661584 | Ndrg3        | 0,47448465 | 0,0007668  | 0,00288586 |
| NM_144491   | chr11 | 74993837  | 75006669  | Dph1         | 0,47434764 | 0,00069826 | 0,00276589 |
| AY903215    | chr16 | 10106499  | 10154390  | Atf7ip2      | 0,47333166 | 0,00815789 | 0,01259904 |
| NM_153533   | chr15 | 101903263 | 101944433 | Tenc1        | 0,47311517 | 0,00107333 | 0,00345736 |
| BC026147    | chr11 | 72777422  | 72809238  | Atp2a3       | 0,47294577 | 0,00961434 | 0,01430514 |
| XM_897713   | chr17 | 71521071  | 71545379  | Wdr43        | 0,47281138 | 0,00584768 | 0,00989046 |
| NM_011593   | chrX  | 20027997  | 20031591  | Timp1        | 0,47222184 | 0,0118236  | 0,0168521  |
| BC046533    | chr3  | 89465078  | 89467444  | Zbtb7b       | 0,47218693 | 0,00019768 | 0,0015188  |
| AK154925    | chr11 | 74465689  | 74487042  | 1300001I01Ri | 0,47213783 | 0,00175069 | 0,00452537 |
| BC048383    | chr5  | 27592870  | 28057268  | Dpp6         | 0,47187501 | 0,00248933 | 0,00557528 |
| BC065161    | chr1  | 174158754 | 174164703 | Kcnj9        | 0,47160034 | 0,00735568 | 0,01166034 |
| BC100452    | chr7  | 18859885  | 18873939  | Tommm40      | 0,4714598  | 0,0020463  | 0,00496052 |
| NM_007939   | chr4  | 136201494 | 136228894 | Epha8        | 0,47120715 | 0,00183142 | 0,00466421 |
| NM_008012   | chr6  | 34284321  | 34298612  | Akr1b8       | 0,47098184 | 0,01316642 | 0,01841591 |
| BC034733    | chr1  | 90938456  | 90984971  | Sh3bp4       | 0,47079579 | 0,0058692  | 0,00990972 |
| XM_976684   | chr3  | 28454287  | 28731162  | LOC665113    | 0,47014684 | 0,01382405 | 0,01913605 |
| NM_145610   | chr9  | 20638658  | 20642580  | Ppan         | 0,47002737 | 0,01334147 | 0,01862807 |
| BC003244    | chr19 | 46129323  | 46136635  | Nolc1        | 0,4699785  | 0,00166128 | 0,00441576 |
| NM_178774   | chr17 | 8178579   | 8182287   | 9630019K15R  | 0,46988187 | 0,00266283 | 0,00582901 |
| XM_977005   | chr6  | 41201009  | 41201528  | LOC665446    | 0,46980371 | 0,00662299 | 0,01082112 |
| BC012511    | chr3  | 51476343  | 51484469  | 4930583H14R  | 0,46962681 | 0,01055731 | 0,01540447 |
| BC017530    | chr17 | 47064427  | 47074398  | Bysl         | 0,46935887 | 0,00384391 | 0,00743587 |
| XM_905039   | chr14 | 100616518 | 100820909 | Lmo7         | 0,46920599 | 0,00047344 | 0,00229442 |
| BC031796    | chr11 | 4604701   | 4637671   | Zmat5        | 0,46910735 | 0,01303562 | 0,0182609  |
| NM_145067   | chr6  | 136661480 | 136745938 | Gucy2c       | 0,46878771 | 0,00228626 | 0,00526891 |
| NM_021514   | chr15 | 97940154  | 97960485  | Pfkm         | 0,46873789 | 0,00023959 | 0,0016811  |
| NM_173071   | chr4  | 129494371 | 129524652 | Bai2         | 0,46872923 | 0,00102484 | 0,00337061 |
| XM_985039   | chr10 | 82049653  | 82053021  | 1810014B01R  | 0,46869782 | 0,00109789 | 0,00350595 |
| NM_010256   | chr16 | 91510267  | 91535812  | Gart         | 0,46867183 | 0,00031252 | 0,00187261 |
| NM_010198   | chr11 | 69614396  | 69617820  | Fgf11        | 0,46850077 | 0,00093801 | 0,00321957 |
| XM_990238   | chr6  | 125128553 | 125131222 | LOC14433     | 0,46755565 | 0,00275334 | 0,00593256 |
| NM_009397   | chr10 | 18690331  | 18704783  | Tnfrsp3      | 0,46744656 | 0,00989543 | 0,01463935 |
| BC013498    | chr3  | 153859743 | 153881814 | Acadm        | 0,4674336  | 0,00020722 | 0,00156389 |
| NM_010693   | chr4  | 129050661 | 129060676 | Lck          | 0,46713453 | 0,00318748 | 0,00651988 |
| NM_026438   | chr10 | 61043977  | 61069522  | Ppa1         | 0,4670946  | 0,0001556  | 0,00139921 |
| BC002096    | chr12 | 113588368 | 113593307 | Crip2        | 0,46691656 | 0,00051186 | 0,00235094 |
| NM_00103304 | chr14 | 55356807  | 55479142  | Rnf17        | 0,46687233 | 0,00140221 | 0,0040231  |
| AK165475    | chr19 | 16819338  | 16847952  | Vps13a       | 0,46667174 | 0,00203736 | 0,00495532 |
| NM_009228   | chr2  | 154067768 | 154099522 | Snta1        | 0,46592296 | 0,01183441 | 0,01686347 |
| NM_010285   | chr2  | 157020941 | 157038038 | Ghrh         | 0,46563132 | 0,00824548 | 0,01268307 |
| NM_199028   | chr10 | 43167554  | 43203826  | AK122525     | 0,46562056 | 0,00287874 | 0,00610785 |
| X04684      | chrX  | 20027205  | 20031691  | Timp1        | 0,46552052 | 0,01031265 | 0,01513267 |
| NM_008358   | chr2  | 11623700  | 11651102  | Il15ra       | 0,46529578 | 0,00213895 | 0,0050365  |
| NM_008879   | chr14 | 73870579  | 73964963  | Lcp1         | 0,46517324 | 0,00151195 | 0,00418438 |
| BC091645    | chr11 | 68915163  | 68926142  | Per1         | 0,46496048 | 8,12E-05   | 0,00111548 |
| NM_145822   | chr7  | 18515370  | 18517941  | Cd3eap       | 0,46490462 | 0,01194436 | 0,01697956 |
| NM_010121   | chr6  | 70774113  | 70834817  | Eif2ak3      | 0,46459751 | 0,00837875 | 0,01281803 |
| NM_021312   | chr1  | 60021413  | 60042424  | Wdr12        | 0,46453848 | 0,00085851 | 0,00304849 |
| AK038580    | chr4  | 107321092 | 107370748 | N/A          | 0,46429275 | 0,00085132 | 0,0030347  |
| NM_052994   | chr10 | 59501613  | 59529271  | Spock2       | 0,46422303 | 0,00018746 | 0,00149633 |
| AK086428    | chr19 | 47181968  | 47184562  | Pdcd11       | 0,4642123  | 0,00610613 | 0,0101974  |
| BC013474    | chr17 | 45895446  | 45901643  | Slc22a7      | 0,46414796 | 0,00608618 | 0,01017287 |
| BC048181    | chr17 | 6587932   | 6632401   | Vil2         | 0,46410935 | 0,00025269 | 0,00170812 |
| NM_009109   | chr7  | 28712103  | 28833911  | Ryr1         | 0,46369776 | 0,00050773 | 0,00234659 |
| XM_890706   | chr4  | 116517333 | 116570762 | Eif2b3       | 0,46366991 | 0,00227954 | 0,00526155 |
| BC013530    | chr1  | 72192382  | 72217446  | Pecr         | 0,46366776 | 0,00052635 | 0,00238658 |
| NM_029238   | chr14 | 48220470  | 48447788  | Slc35f4      | 0,46358421 | 0,0014152  | 0,00404285 |
| BC028662    | chr7  | 139950789 | 139953722 | 1810014F10Ri | 0,46354994 | 0,00095528 | 0,00326383 |
| BC010275    | chr5  | 145367852 | 145381585 | Arpc1b       | 0,46350067 | 0,00178741 | 0,00459136 |
| NM_010274   | chr2  | 57053682  | 57182998  | Gpd2         | 0,4634482  | 0,00186384 | 0,00470457 |
| BC107298    | chr3  | 88368681  | 88382792  | 1700021C14R  | 0,46338396 | 0,01315918 | 0,01841591 |
| NM_026247   | chrX  | 139564388 | 139571556 | Glt28d1      | 0,46337646 | 0,0039947  | 0,00765554 |
| AK013903    | chr7  | 3307124   | 3309982   | N/A          | 0,46333578 | 0,00037448 | 0,00204961 |
| NM_023850   | chr2  | 92412615  | 92416089  | Chst1        | 0,46310995 | 0,00558321 | 0,00959006 |

|             |       |           |           |              |            |            |             |
|-------------|-------|-----------|-----------|--------------|------------|------------|-------------|
| NM_020603   | chr17 | 33551176  | 33560149  | Wdr46        | 0,46309925 | 0,00760738 | 0,01197339  |
| XM_888586   | chr19 | 10275315  | 10307793  | Gm98         | 0,46296766 | 0,0033379  | 0,00671863  |
| AK147553    | chr16 | 43884368  | 43899120  | Zdhhc23      | 0,46296018 | 0,00202417 | 0,00493785  |
| XM_140340   | chr18 | 51990622  | 51991282  | LDC240289    | 0,46235514 | 0,01105213 | 0,01598176  |
| NM_026358   | chr3  | 51476344  | 51484438  | 4930583H14R  | 0,46226435 | 0,01392335 | 0,01923778  |
| BC108987    | chr5  | 21322846  | 21373822  | Slc26a5      | 0,46204865 | 0,00394065 | 0,00758218  |
| XM_914103   | chr17 | 23278694  | 23283603  | Casp14l      | 0,46204224 | 0,01456458 | 0,01998941  |
| XM_131399   | chr4  | 45444375  | 45551862  | Shb          | 0,46203477 | 0,00163828 | 0,00438289  |
| AY137345    | chr6  | 128853206 | 128862465 | Clec2i       | 0,46194191 | 0,00393435 | 0,00757397  |
| NM_025404   | chr11 | 101481650 | 101483919 | Arfl4        | 0,46161542 | 0,00411705 | 0,00779251  |
| NM_026015   | chr11 | 4604680   | 4637669   | Zmat5        | 0,46148532 | 0,00255926 | 0,0056828   |
| NM_198246   | chr16 | 16216559  | 16223206  | Yars2        | 0,46147786 | 0,0031222  | 0,00642323  |
| BC015304    | chr2  | 154751172 | 154765868 | Ahcy         | 0,46143521 | 0,00143635 | 0,00406212  |
| NM_138747   | chr6  | 125097557 | 125110372 | Nol1         | 0,46064588 | 0,00422156 | 0,0078949   |
| XM_986352   | chr9  | 88318944  | 88320427  | 2810026P18Ri | 0,46058202 | 0,00268863 | 0,00586521  |
| NM_054087   | chr1  | 166085729 | 166102044 | Slc19a2      | 0,46043306 | 0,00238054 | 0,00431295  |
| BC062809    | chrX  | 159717870 | 159746753 | Figf         | 0,46037136 | 0,0114989  | 0,01647595  |
| BC078441    | chr2  | 29995481  | 29999993  | D2Wsu81e     | 0,46030223 | 0,00600034 | 0,01006677  |
| NM_010157   | chr12 | 77039258  | 77096099  | Esr2         | 0,46029691 | 0,00517372 | 0,00910172  |
| AK145856    | chr4  | 116517363 | 116523206 | Eif2b3       | 0,46023417 | 0,00678295 | 0,01100407  |
| NM_00101587 | chr5  | 130541831 | 130625860 | Rsafd1       | 0,45998753 | 0,00026112 | 0,00174529  |
| NM_172398   | chr6  | 34314404  | 34327107  | 2310005E10R  | 0,45945857 | 0,00059949 | 0,00253308  |
| AK137991    | chr14 | 68904492  | 68910506  | Pdlim2       | 0,45850202 | 0,00608632 | 0,01017287  |
| NM_153450   | chrX  | 8429872   | 8468133   | Xklh         | 0,45849143 | 0,0008805  | 0,00309573  |
| NM_146100   | chr19 | 47068012  | 47077971  | Ina          | 0,45801074 | 0,00834404 | 0,0127819   |
| NM_018751   | chr17 | 53426543  | 53455560  | Sult1c1      | 0,45796418 | 0,00668167 | 0,01089013  |
| AK135714    | chr1  | 72200203  | 72217467  | Pecr         | 0,45792821 | 0,00268863 | 0,00586521  |
| NM_153419   | chr7  | 45693271  | 45698818  | Grwd1        | 0,45768386 | 0,00680851 | 0,01102154  |
| AK149350    | chr8  | 112490459 | 112497549 | Dhodh        | 0,45758447 | 0,00202559 | 0,00493928  |
| NM_009086   | chr2  | 128792478 | 128818036 | Rpo1-2       | 0,4575147  | 0,00161659 | 0,00434735  |
| NM_011777   | chr6  | 42279863  | 42288002  | Zyx          | 0,45740266 | 0,00604034 | 0,01011872  |
| XM_902514   | chr2  | 154240367 | 154241449 | 1700003F12Ri | 0,45726635 | 0,01194406 | 0,01697956  |
| AB041538    | chr14 | 48220469  | 48447816  | Slc35f4      | 0,45670147 | 0,00389181 | 0,00750663  |
| BC057460    | chr5  | 136368689 | 136396485 | Rasa4        | 0,45637553 | 0,00417837 | 0,00784504  |
| NM_152822   | chrX  | 92138031  | 92159678  | Las1l        | 0,45621106 | 0,0057126  | 0,00973411  |
| NM_007420   | chr18 | 62303184  | 62305328  | Adrb2        | 0,45615098 | 0,00657606 | 0,01075919  |
| NM_026212   | chr2  | 26415595  | 26426219  | Agpat2       | 0,45614993 | 0,00010775 | 0,00121439  |
| BC004733    | chr6  | 125105444 | 125110371 | Nol1         | 0,45584229 | 0,00805462 | 0,01248937  |
| NM_007854   | chr19 | 5026105   | 5031964   | Slc29a2      | 0,45577489 | 0,00488006 | 0,00876089  |
| AK049850    | chrX  | 147950716 | 147985194 | Apxl         | 0,45562222 | 0,0019138  | 0,0047861   |
| NM_178723   | chr2  | 77211938  | 77617655  | Zfp533       | 0,4556138  | 0,00058519 | 0,00251181  |
| BC027829    | chr8  | 112482607 | 112497752 | Dhodh        | 0,45537805 | 0,00531605 | 0,00927818  |
| NM_134079   | chr14 | 19841182  | 20237099  | Adk          | 0,45533176 | 0,0008341  | 0,00300224  |
| NM_133195   | chr18 | 25622124  | 25897167  | Brunol4      | 0,45509932 | 0,00016177 | 0,00142469  |
| AK054172    | chr11 | 119045218 | 119078990 | Ccdc40       | 0,45484808 | 0,00328383 | 0,00665246  |
| D29763      | chr11 | 77747206  | 77795235  | Sez6         | 0,45467156 | 0,00357189 | 0,00704242  |
| NM_019553   | chr10 | 61975603  | 61997655  | Ddx21        | 0,45438171 | 0,00115556 | 0,00361599  |
| NM_020253   | chr19 | 6428015   | 6533217   | Nrxn2        | 0,45416549 | 0,0024976  | 0,0055875   |
| NM_183199   | chr10 | 93261353  | 93278337  | Usp44        | 0,45405637 | 0,01146589 | 0,01643656  |
| BC090622    | chr8  | 73772894  | 73792247  | Kcnn1        | 0,45378684 | 0,00286401 | 0,00608309  |
| AF364579    | chr12 | 77174290  | 77236540  | Mthfd1       | 0,45361911 | 0,00070235 | 0,00277023  |
| AK139862    | chr16 | 10106526  | 10140720  | Atf7ip2      | 0,45360234 | 0,00718712 | 0,01144488  |
| AF226605    | chr4  | 41927864  | 41929763  | Oprs1        | 0,45355204 | 0,00383461 | 0,0074224   |
| XM_484889   | chr1  | 87548251  | 87567800  | A630001G21R  | 0,45349231 | 0,00028573 | 0,00181419  |
| NM_130453   | chr19 | 6226400   | 62277768  | Gpha2        | 0,45342212 | 0,0014747  | 0,00412326  |
| NM_021397   | chr7  | 30298440  | 30300663  | Zbtb32       | 0,4534085  | 0,01127004 | 0,0162378   |
| NM_019501   | chr2  | 22747278  | 22767173  | Pdss1        | 0,45331422 | 0,00178464 | 0,004559017 |
| BC057871    | chr16 | 97896850  | 97918633  | Ripk4        | 0,45329013 | 0,00053827 | 0,00240299  |
| BC060960    | chr4  | 21970507  | 22001596  | Coq3         | 0,45290488 | 0,01430198 | 0,01966976  |
| BC080751    | chr11 | 115823344 | 115824404 | Itgb4        | 0,45263708 | 0,00231123 | 0,00530595  |
| BC032970    | chr9  | 88318945  | 88320766  | 2810026P18Ri | 0,45250637 | 0,00096109 | 0,00327993  |
| AK155135    | chr6  | 50129809  | 50181099  | Dfna5h       | 0,45166656 | 0,0051774  | 0,0091055   |
| NM_029573   | chr9  | 54384647  | 54402799  | Idh3a        | 0,45159977 | 0,00358316 | 0,00705276  |
| NM_133249   | chr18 | 61423504  | 61525800  | Ppargc1b     | 0,45156534 | 0,00861135 | 0,01310103  |
| BC092051    | chr5  | 145367838 | 145381585 | Arpc1b       | 0,45142973 | 0,0011286  | 0,00355829  |
| AK138241    | chrX  | 9864134   | 9874201   | N/A          | 0,45140887 | 0,00169105 | 0,00446107  |
| AY129326    | chr11 | 69732919  | 69737581  | Eif5a        | 0,45109087 | 0,00256897 | 0,00569375  |
| AK086787    | chr5  | 5676943   | 5699767   | Steap2       | 0,45087414 | 0,00136861 | 0,00397187  |
| AK131642    | chr7  | 126614450 | 126621362 | 1500016O10R  | 0,45069083 | 0,00825312 | 0,01268826  |
| AK146829    | chr5  | 137834897 | 137841192 | Pcolce       | 0,45036085 | 0,00515493 | 0,00908469  |
| NM_029619   | chr2  | 19289389  | 19312724  | Msrp2        | 0,45035877 | 0,01124722 | 0,01621274  |
| XM_900447   | chr4  | 133354387 | 133364578 | Aim1l        | 0,45034316 | 0,01360637 | 0,01891266  |
| BC006652    | chr15 | 10122488  | 10274100  | Prlr         | 0,44949387 | 0,00458082 | 0,00835717  |
| NM_021347   | chr11 | 98480440  | 98493798  | Gsdm1        | 0,4492042  | 0,00138064 | 0,00398228  |
| NM_008429   | chr1  | 174158761 | 174165957 | Kcnpj9       | 0,44915231 | 0,00644828 | 0,010605    |
| NM_011206   | chr1  | 34404303  | 34418330  | Ptpn18       | 0,44913675 | 0,00309523 | 0,0063876   |



|             |       |            |           |              |            |            |            |
|-------------|-------|------------|-----------|--------------|------------|------------|------------|
| XM_897631   | chr3  | 62426705   | 62467648  | 4631416L12Ri | 0,44903299 | 0,00870957 | 0,01320275 |
| XM_148862   | chr18 | 67448399   | 67453579  | B430212C06R  | 0,44902157 | 0,00609877 | 0,01018796 |
| BC003441    | chr5  | 145367850  | 145381585 | Arpc1b       | 0,44890851 | 0,00181934 | 0,00464535 |
| BC021593    | chr19 | 5730306    | 5731702   | Sscca1       | 0,44883176 | 0,00768541 | 0,01207591 |
| BC099519    | chr2  | 21098484   | 21123018  | 4933434I06Ri | 0,44879754 | 0,00163111 | 0,00436671 |
| NM_008819   | chr11 | 59786811   | 59853034  | Pemt         | 0,44867209 | 0,00404017 | 0,00770706 |
| AK051740    | chr14 | 24527377   | 24529041  | N/A          | 0,44824519 | 0,0020513  | 0,00496745 |
| BC011487    | chr6  | 42552625   | 42574648  | BC011487     | 0,44785181 | 0,00667942 | 0,01089013 |
| BC048431    | chr17 | 25445127   | 25446687  | Gng13        | 0,44762008 | 0,00019826 | 0,00152123 |
| NM_011819   | chr8  | 73558381   | 73561082  | Gdf15        | 0,44665    | 0,00703327 | 0,01128123 |
| BC027773    | chr1  | 173087473  | 173096589 | Adamts4      | 0,44653031 | 0,00097434 | 0,00330621 |
| NM_058214   | chr15 | 76530995   | 76537731  | Recql4       | 0,44635392 | 0,00646999 | 0,01036233 |
| NM_009191   | chr7  | 101537588  | 101663989 | Clpb         | 0,44634258 | 0,00061392 | 0,00256359 |
| AK220370    | chr13 | 25063695   | 25213023  | Dcdc2        | 0,44616833 | 0,00322841 | 0,00658044 |
| NM_133816   | chr1  | 90901632   | 90984964  | Sh3bp4       | 0,44615699 | 0,00717801 | 0,01143342 |
| AK140368    | chr15 | 76548731   | 76551095  | C030006K11R  | 0,44613431 | 0,00360839 | 0,00108371 |
| NM_174960   | chr6  | 48605720   | 48608290  | Gimap9       | 0,44611575 | 0,00207497 | 0,00498443 |
| BC019561    | chr18 | 67590268   | 67605137  | BC019561     | 0,44575308 | 0,00077597 | 0,00290416 |
| BC113139    | chr14 | 65589665   | 65686850  | Adra1a       | 0,44520962 | 0,0090367  | 0,01358724 |
| BC024062    | chrX  | 159613653  | 159717117 | Pir          | 0,44505946 | 0,00098728 | 0,00362851 |
| NM_015728   | chr3  | 64030264   | 64052662  | Slc33a1      | 0,44460107 | 0,00209832 | 0,00501009 |
| XM_00105265 | chr17 | 34633552   | 34635972  | Ng23         | 0,44449014 | 0,00668656 | 0,01089512 |
| BC014742    | chr7  | 83768475   | 83775365  | Nesdc2       | 0,44383848 | 0,00259861 | 0,00573812 |
| AK143881    | chr14 | 68230930   | 68235667  | N/A          | 0,44372262 | 0,00166398 | 0,00441792 |
| XM_906068   | chr10 | 28907535   | 28916787  | 9330159F19Ri | 0,44357604 | 0,00627325 | 0,01040139 |
| BC016113    | chr11 | 101481664  | 101483922 | Arfl4        | 0,44325434 | 0,0004136  | 0,00212047 |
| NM_146260   | chr9  | 110710861  | 110724899 | Tmie         | 0,44318266 | 0,00160011 | 0,0043206  |
| XM_987524   | chr5  | 105460782  | 105479837 | LOC626578    | 0,44313658 | 0,00884915 | 0,01336338 |
| BC043030    | chr3  | 89331892   | 89335649  | Krtcap2      | 0,44266688 | 0,00181134 | 0,00463286 |
| NM_020046   | chr8  | 112482376  | 112497802 | Dhodh        | 0,44264438 | 0,00587003 | 0,00990972 |
| NM_172287   | chr8  | 126218802  | 126255608 | Spire2       | 0,44142901 | 0,00029824 | 0,00183877 |
| AK009235    | chr3  | 104909173  | 104914069 | Ppm1j        | 0,44134028 | 0,0064026  | 0,01055358 |
| AF273690    | chr2  | 143677303  | 143702619 | Rrbp1        | 0,44133212 | 0,00235332 | 0,00537263 |
| NM_033080   | chr7  | 35243505   | 35264607  | Nudt19       | 0,44069833 | 0,0100599  | 0,0148495  |
| BC016424    | chr9  | 21822647   | 21835777  | Sitpec       | 0,44057209 | 0,0012137  | 0,0037101  |
| XM_355952   | chr7  | 138779403  | 138865191 | 6330417G02R  | 0,44006341 | 0,00320437 | 0,00654935 |
| NM_026637   | chr6  | 54914672   | 54922445  | A030007L17Ri | 0,43986621 | 0,00169714 | 0,00446925 |
| NM_023680   | chr7  | 1434446114 | 143459028 | Tnfrsf22     | 0,43975747 | 0,00213507 | 0,00503134 |
| NM_139001   | chr9  | 56663296   | 56697272  | Cspg4        | 0,43971074 | 0,01264335 | 0,01780763 |
| AK149430    | chr1  | 173050660  | 173057376 | Nr1i3        | 0,43964064 | 0,00074227 | 0,00282593 |
| BC062161    | chr15 | 76284774   | 76286692  | Scx          | 0,43944159 | 0,00306657 | 0,00635886 |
| BC012660    | chr6  | 124686337  | 124698708 | Ptpn6        | 0,43932079 | 0,00308818 | 0,00637966 |
| BC104393    | chr6  | 65520172   | 65560932  | 9030611K07R  | 0,43915841 | 0,00051786 | 0,00235866 |
| BC062092    | chr1  | 134396795  | 134431391 | Nfasc        | 0,43913913 | 0,00198835 | 0,00489858 |
| AK039202    | chr7  | 28894210   | 28922795  | A230107C01R  | 0,43895654 | 0,01164142 | 0,01664415 |
| NM_031196   | chr10 | 76476974   | 76494142  | Slc19a1      | 0,43856624 | 0,00176107 | 0,00454721 |
| BC019542    | chr8  | 112482875  | 112497512 | Dhodh        | 0,43806494 | 0,00700488 | 0,01124478 |
| NM_008036   | chr7  | 18461435   | 18468273  | Fosb         | 0,43797487 | 0,00117722 | 0,00365362 |
| NM_021476   | chrX  | 102779235  | 102806181 | Cysltr1      | 0,43793237 | 0,01086563 | 0,01578482 |
| U50921      | chr3  | 54244032   | 54406396  | Trpc4        | 0,43791112 | 0,00364201 | 0,00713181 |
| NM_007921   | chr1  | 137069989  | 137074849 | Elf3         | 0,43785244 | 0,0025344  | 0,00564729 |
| BC066216    | chr8  | 95849206   | 95888052  | Slc6a2       | 0,43719132 | 0,0025419  | 0,00565901 |
| NM_201396   | chr2  | 168441233  | 168458234 | Sall4        | 0,43716809 | 0,0031138  | 0,00644126 |
| NM_173763   | chr3  | 142638465  | 142682296 | Ccbl2        | 0,43699439 | 0,0118222  | 0,0168521  |
| NM_145472   | chr15 | 76548719   | 76551074  | C030006K11R  | 0,43683994 | 0,0084142  | 0,01285965 |
| BC011484    | chr18 | 36888041   | 36889782  | Wdr55        | 0,43648783 | 0,00111314 | 0,00353573 |
| BC037690    | chr6  | 34314444   | 34327106  | 2310005E10R  | 0,43644548 | 0,00030695 | 0,00186288 |
| BC003482    | chr7  | 141327756  | 141344734 | Tspan4       | 0,43642833 | 0,00568764 | 0,00971214 |
| BC043023    | chr19 | 89066608   | 89157111  | Bscl2        | 0,43637086 | 0,00702167 | 0,01126566 |
| AF273693    | chr2  | 143677303  | 143702619 | Rrbp1        | 0,43625594 | 0,00462939 | 0,00842761 |
| AK048059    | chr2  | 166883011  | 166931794 | Ptgis        | 0,43600503 | 0,00431336 | 0,00802648 |
| NM_199223   | chr2  | 84672784   | 84687531  | Rtn4rl2      | 0,43588315 | 0,00097613 | 0,00331041 |
| NM_020604   | chr1  | 16982677   | 17083012  | Jph1         | 0,43577641 | 0,00089374 | 0,00311605 |
| XM_00100002 | chr4  | 88276671   | 88278227  | LOC668208    | 0,43554489 | 0,00411714 | 0,00779251 |
| BC059820    | chr4  | 41303097   | 41312928  | Nol6         | 0,43523405 | 0,00983885 | 0,01457734 |
| NM_008887   | chr7  | 101692310  | 101696547 | Phox2a       | 0,43431489 | 0,00412631 | 0,00779519 |
| NM_028370   | chr17 | 55245183   | 55305719  | 2810458H16R  | 0,43427576 | 0,00477115 | 0,00861871 |
| BC060376    | chr4  | 140518258  | 140529270 | Arhgef19     | 0,43394577 | 0,01131193 | 0,01627346 |
| D49545      | chr15 | 76487820   | 76495449  | Kifc2        | 0,43360601 | 0,01039724 | 0,01522681 |
| AK087121    | chr8  | 36657555   | 3669259   | 1810033B17R  | 0,43320546 | 0,0021238  | 0,0050207  |
| BC055022    | chr7  | 92750511   | 92809213  | Prcp         | 0,43314541 | 0,01043222 | 0,01527054 |
| BC050809    | chr8  | 3470861    | 3487178   | 1700019B03R  | 0,4329513  | 0,00022132 | 0,00161725 |
| NM_011073   | chr10 | 60693190   | 60699667  | Prf1         | 0,4329503  | 8,93E-05   | 0,00112072 |
| AK163576    | chr19 | 17203793   | 17260802  | A230083H22R  | 0,4329353  | 0,00548389 | 0,00947406 |
| X05389      | chr17 | 35047273   | 35051787  | H2-Q7        | 0,43292529 | 0,00870844 | 0,01320275 |
| AK134365    | chr11 | 74714292   | 74718050  | Tsr1         | 0,43289129 | 0,00775261 | 0,01215065 |

|           |       |           |           |              |            |            |            |
|-----------|-------|-----------|-----------|--------------|------------|------------|------------|
| NM_030562 | chr7  | 28160797  | 28170892  | Lrnf1        | 0,43275228 | 0,00322831 | 0,00658044 |
| AB001539  | chr7  | 45693273  | 45698986  | Grwd1        | 0,43263931 | 0,00404546 | 0,00771311 |
| BC068315  | chr10 | 57996147  | 58071011  | Edar         | 0,43245642 | 0,00058322 | 0,00250706 |
| BC057212  | chr8  | 73737482  | 73750410  | Il12rb1      | 0,43239847 | 0,00300359 | 0,0062833  |
| BC106849  | chr4  | 46082089  | 46135829  | Tmod1        | 0,43225563 | 0,0020638  | 0,00497429 |
| NM_009049 | chr1  | 75155349  | 75161528  | Resp18       | 0,43224065 | 0,00726807 | 0,01155218 |
| NM_173372 | chr11 | 50700246  | 50709631  | Grm6         | 0,4320779  | 0,00858898 | 0,01307315 |
| AK083112  | chr3  | 108214031 | 108216065 | N/A          | 0,43185134 | 0,00050508 | 0,00234312 |
| AK146342  | chr15 | 3976683   | 4103963   | Oxct1        | 0,43162889 | 0,00064303 | 0,0026367  |
| XM_889643 | chr1  | 180592482 | 180593022 | LOC625097    | 0,43155011 | 0,00363284 | 0,0071256  |
| BC060656  | chr2  | 128792506 | 128818030 | Rpo1-2       | 0,43154712 | 0,007977   | 0,01241098 |
| BC060272  | chr19 | 6517176   | 6532278   | Nrxn2        | 0,43153216 | 0,00081097 | 0,00296989 |
| BC018546  | chr2  | 154067768 | 154099473 | Snta1        | 0,43151422 | 0,01125482 | 0,01621978 |
| AK151863  | chr14 | 19864703  | 20237114  | Adk          | 0,43093236 | 0,00162677 | 0,00436096 |
| BC049902  | chr6  | 125181237 | 125187784 | Vamp1        | 0,43089353 | 0,00675146 | 0,01097388 |
| AK037973  | chr5  | 8992186   | 9003048   | Crot         | 0,43057606 | 0,00170349 | 0,00447804 |
| AY219716  | chr2  | 11623662  | 11651254  | Il15ra       | 0,43030853 | 0,00151357 | 0,00418438 |
| BC070412  | chr18 | 37969578  | 38061397  | Diap1        | 0,42982064 | 0,00039363 | 0,0020677  |
| NM_029803 | chr12 | 103843216 | 103844709 | Ifi2         | 0,42973326 | 0,01380663 | 0,01912188 |
| NM_007400 | chr7  | 133722314 | 134063440 | Adam12       | 0,42953969 | 0,01266009 | 0,01782699 |
| BC063326  | chr9  | 36980956  | 37005097  | Slc37a2      | 0,42907051 | 0,00368302 | 0,00719233 |
| BC004572  | chr5  | 93333458  | 93353351  | Asah1        | 0,42894166 | 0,01382314 | 0,01913605 |
| NM_026094 | chr10 | 79922713  | 79942253  | Atp8b3       | 0,428795   | 0,00350854 | 0,00694717 |
| XM_203596 | chr12 | 112554490 | 112575381 | A530050D06R  | 0,42857611 | 0,00153919 | 0,00241527 |
| NM_139236 | chr4  | 41303524  | 41312959  | Nol6         | 0,42843057 | 0,00400481 | 0,0076626  |
| AK169925  | chr11 | 106567354 | 106584809 | Gm885        | 0,42785979 | 0,00607076 | 0,01015757 |
| AK139115  | chr11 | 68813149  | 68824646  | Pfas         | 0,42759    | 0,00589375 | 0,0099317  |
| NM_011076 | chr5  | 8666097   | 8754525   | Abcb1a       | 0,42741023 | 0,00265488 | 0,00582569 |
| NM_010216 | chrX  | 159717652 | 159746752 | Figf         | 0,42735592 | 3,18E-05   | 0,00083399 |
| NM_016975 | chr14 | 55989769  | 56012055  | Gja3         | 0,42735098 | 0,00979952 | 0,0145299  |
| NM_008795 | chr1  | 133941205 | 133967230 | Pctk3        | 0,42726311 | 0,00402551 | 0,00768741 |
| AK172368  | chr9  | 39942886  | 39964175  | Zfp202       | 0,42704401 | 0,0022303  | 0,00518404 |
| AB024521  | chr4  | 88245064  | 88246032  | Ifnz         | 0,42654603 | 0,00383569 | 0,0074224  |
| BC003314  | chr15 | 79719680  | 79735169  | Apobec3      | 0,42641103 | 0,00680068 | 0,01101186 |
| NM_026662 | chrX  | 162690437 | 162726804 | Prps2        | 0,42559802 | 0,00765458 | 0,01203814 |
| NM_172558 | chr11 | 57937484  | 57984668  | Gemin5       | 0,42551936 | 0,00311716 | 0,00641731 |
| NM_028838 | chr9  | 110796360 | 110828878 | Lrrc2        | 0,42547807 | 0,00828709 | 0,01272081 |
| NM_153126 | chr2  | 103522097 | 103562089 | Nat10        | 0,42528641 | 0,00040008 | 0,00208685 |
| NM_028231 | chr3  | 32093580  | 32391058  | Kcnmb2       | 0,42520683 | 0,00206336 | 0,00497429 |
| NM_027733 | chr18 | 35785990  | 35788160  | S133400G04R  | 0,42515476 | 0,00731277 | 0,01160467 |
| XM_620066 | chr4  | 88231259  | 88232815  | LOC545645    | 0,42505851 | 0,00332754 | 0,00670723 |
| NM_008745 | chr13 | 58816218  | 58946654  | Ntrk2        | 0,42504574 | 0,00017407 | 0,00145326 |
| XM_621703 | chr6  | 23107986  | 23111541  | LOC546894    | 0,42495736 | 0,0062832  | 0,01040279 |
| XM_896688 | chr9  | 57348112  | 57350896  | Mpi1         | 0,42484152 | 0,00013417 | 0,0013321  |
| BC080770  | chrX  | 159717671 | 159746749 | Figf         | 0,42466977 | 0,00046084 | 0,00226977 |
| AK150664  | chr5  | 44032865  | 44070355  | Fbxl5        | 0,4244775  | 0,00170714 | 0,00448567 |
| AK044731  | chr7  | 139949830 | 139953726 | 1810014F10Ri | 0,42438042 | 0,00026096 | 0,00174529 |
| NM_145066 | chr6  | 13785070  | 13789848  | Gpr85        | 0,4242765  | 0,00316831 | 0,00649346 |
| XM_283428 | chr17 | 24256653  | 24261489  | Rab26        | 0,42283694 | 0,00306077 | 0,00634944 |
| XM_620072 | chr4  | 88262035  | 88263591  | LOC545651    | 0,42245317 | 0,0048213  | 0,0086763  |
| BC009023  | chr15 | 5180620   | 5190897   | Ptger4       | 0,42212436 | 0,01019742 | 0,01500815 |
| BC094917  | chr14 | 42155084  | 42185871  | 1700049E17R  | 0,4219079  | 0,00018166 | 0,00147387 |
| BC112972  | chrX  | 139628323 | 139934365 | Trpc5        | 0,42135554 | 0,01193732 | 0,01697956 |
| BC107273  | chr2  | 22747353  | 22767173  | Pdss1        | 0,42134873 | 0,00231782 | 0,00531902 |
| BC028540  | chr6  | 67790730  | 67791240  | N/A          | 0,42117937 | 0,00518667 | 0,00911642 |
| XM_620073 | chr4  | 88264972  | 88266528  | LOC545652    | 0,42082919 | 0,00172159 | 0,00449618 |
| BC012206  | chr11 | 31259441  | 31269893  | Stc2         | 0,42014717 | 0,00369764 | 0,00721852 |
| NM_009759 | chrX  | 159536966 | 159602298 | Bmx          | 0,41988709 | 0,00329008 | 0,00666285 |
| BC052744  | chr18 | 25622121  | 25896993  | Brunol4      | 0,41896162 | 0,00062004 | 0,00257788 |
| NM_146564 | chr9  | 18871358  | 18872312  | Olf4836      | 0,41835995 | 0,0045186  | 0,00826761 |
| BC058565  | chr12 | 113208512 | 113216795 | Pld4         | 0,41803433 | 0,01172678 | 0,01674212 |
| NM_008144 | chr19 | 8906547   | 8915712   | Bscl2        | 0,41773309 | 0,00875825 | 0,01325969 |
| XM_487805 | chr4  | 88226098  | 88226647  | LOC435791    | 0,41764913 | 0,00477195 | 0,00861871 |
| NM_008137 | chr19 | 16502780  | 16677839  | Gna14        | 0,41758545 | 0,010079   | 0,01487033 |
| NM_178045 | chr6  | 116598626 | 116639410 | Rassf4       | 0,41748415 | 0,00943257 | 0,01407658 |
| BC098502  | chr17 | 6588120   | 6632390   | Vil2         | 0,41744364 | 0,00062572 | 0,00259786 |
| XM_896679 | chr9  | 57345803  | 57350900  | Mpi1         | 0,41734527 | 0,00037088 | 0,00204552 |
| NM_019441 | chr17 | 34224717  | 34235161  | Ppt2         | 0,41705513 | 0,00146735 | 0,004113   |
| AF190991  | chr7  | 3722663   | 3738417   | Ttyh1        | 0,41680274 | 0,00176961 | 0,00456334 |
| BC027196  | chr2  | 71674145  | 71702822  | Pdk1         | 0,41640617 | 4,73E-05   | 0,00092791 |
| AK161440  | chr3  | 53551860  | 53562108  | 2810046L04Ri | 0,41606572 | 0,00333316 | 0,00671354 |
| NM_015790 | chr10 | 77472496  | 77482654  | Icosl        | 0,41606091 | 0,00416353 | 0,00783307 |
| AK133783  | chr13 | 74092912  | 74095677  | Tert         | 0,41555461 | 0,00012654 | 0,00131203 |
| NM_024223 | chr12 | 113588354 | 113593314 | Crip2        | 0,41536935 | 0,00153273 | 0,0042053  |
| BC018480  | chr17 | 46848614  | 46856156  | Guca1b       | 0,41516786 | 0,00915118 | 0,01372908 |
| XM_620071 | chr4  | 88259117  | 88260673  | LOC545650    | 0,41499523 | 0,0062824  | 0,01040279 |

|             |       |           |           |              |            |            |            |
|-------------|-------|-----------|-----------|--------------|------------|------------|------------|
| BC059712    | chr17 | 25445128  | 25446686  | Gng13        | 0,41496359 | 9,48E-05   | 0,00115067 |
| AK005009    | chr15 | 36548084  | 36553562  | Pabpc1       | 0,41490799 | 0,01390758 | 0,01922489 |
| NM_018754   | chr4  | 132872631 | 132873884 | Sfn          | 0,41476613 | 0,00084964 | 0,00303175 |
| XM_00100452 | chr14 | 100770724 | 100821316 | Lmo7         | 0,41467989 | 0,00258014 | 0,00571425 |
| BC051186    | chr12 | 112125960 | 112131710 | 6720458F09Ri | 0,41447203 | 0,006718   | 0,01094037 |
| XM_897362   | chr16 | 10106289  | 10140720  | Atf7ip2      | 0,41396958 | 0,00752706 | 0,01187833 |
| AK135962    | chr4  | 122764062 | 122801108 | Pabpc4       | 0,41384717 | 0,00341197 | 0,00680568 |
| NM_010588   | chr12 | 113356397 | 113377303 | Jag2         | 0,41370759 | 0,00146959 | 0,00411347 |
| AK132489    | chr11 | 35773521  | 35776221  | N/A          | 0,41355946 | 0,00036061 | 0,00201118 |
| XM_619495   | chr17 | 84098381  | 84374634  | Thada        | 0,41345723 | 0,00051222 | 0,00235094 |
| AK153588    | chr17 | 28250881  | 28252936  | E230001N04R  | 0,41296746 | 0,00420371 | 0,00787718 |
| XM_911929   | chr9  | 18245856  | 18472198  | 1110008I14Ri | 0,41222198 | 0,0041977  | 0,00787004 |
| NM_021399   | chr12 | 108363029 | 108451028 | Bcl11b       | 0,41209056 | 0,01026082 | 0,01507887 |
| NM_022024   | chr7  | 28146206  | 28155655  | Gmfg         | 0,41187258 | 0,01131011 | 0,01627346 |
| AK157301    | chr2  | 166727003 | 166734700 | AI481105     | 0,41161002 | 0,00081511 | 0,00297684 |
| BC005789    | chr6  | 34284344  | 34298612  | Akr1b8       | 0,41158719 | 0,00589705 | 0,0099317  |
| AK014877    | chr17 | 79535002  | 79537007  | 4921513D11R  | 0,41118418 | 0,00513682 | 0,0090716  |
| AK079410    | chr7  | 139951876 | 139953726 | 1810014F10Ri | 0,41113858 | 0,00622058 | 0,01033643 |
| NM_177000   | chr5  | 139660080 | 139669734 | C130050O18R  | 0,41110154 | 0,00711803 | 0,01136521 |
| XM_897341   | chr16 | 10106289  | 10154672  | Atf7ip2      | 0,41092205 | 0,00214033 | 0,00503775 |
| XM_992237   | chr10 | 32696296  | 32700782  | LOC667761    | 0,41071703 | 0,00727338 | 0,01155755 |
| NM_008773   | chr7  | 100870658 | 100886078 | P2ry2        | 0,41055005 | 0,00312081 | 0,00642259 |
| BC024942    | chrX  | 162691199 | 162726791 | Prps2        | 0,4105453  | 0,00445342 | 0,00820133 |
| AK132079    | chr17 | 7077573   | 7109037   | Rps6ka2      | 0,41044382 | 0,00090416 | 0,00314322 |
| NM_016868   | chr7  | 16194255  | 16215201  | Hif3a        | 0,41044097 | 0,00280726 | 0,00600073 |
| NM_021463   | chrX  | 135802976 | 135822503 | Prps1        | 0,41024377 | 0,0083234  | 0,01275684 |
| NM_019521   | chr8  | 13465350  | 13494483  | Gas6         | 0,41014141 | 0,01038204 | 0,01520828 |
| AK082945    | chr8  | 14381972  | 14831735  | Algap2       | 0,40988942 | 0,0041794  | 0,00784504 |
| NM_00101378 | chr11 | 74435799  | 74457711  | E130309D14R  | 0,40965084 | 0,00867978 | 0,01317771 |
| AK043912    | chr17 | 24256664  | 24261312  | Rab26        | 0,40963096 | 0,00280061 | 0,00599711 |
| AK165240    | chr10 | 39722950  | 39831670  | Slc16a10     | 0,40955241 | 0,01384143 | 0,01914677 |
| NM_00103972 | chr7  | 28890293  | 28922743  | A230107C01R  | 0,40948429 | 0,01120469 | 0,01616316 |
| NM_011846   | chr5  | 129898921 | 129922919 | Mmp17        | 0,40903324 | 0,00200537 | 0,00491411 |
| NM_015803   | chr14 | 58601850  | 59040944  | Atp8a2       | 0,40851756 | 0,0086337  | 0,01312673 |
| BC066858    | chr7  | 46713898  | 46723668  | Ldha         | 0,40848925 | 0,00074437 | 0,0028303  |
| XM_486255   | chr9  | 107451167 | 107455176 | LOC4344436   | 0,40799499 | 0,00928243 | 0,01390082 |
| NM_008952   | chr11 | 77696809  | 77709979  | Pipox        | 0,40797048 | 0,00062837 | 0,00260219 |
| AK030815    | chr9  | 110732810 | 110745344 | Als2cl       | 0,40719451 | 0,00076982 | 0,00289022 |
| NM_009575   | chrX  | 54377426  | 54382686  | Zic3         | 0,40640686 | 0,00014799 | 0,00137186 |
| XM_486733   | chrX  | 96631731  | 96632604  | Dshin6       | 0,40589168 | 0,00443421 | 0,00818516 |
| XM_976110   | chr14 | 25584087  | 25718518  | Dnahc12      | 0,40584385 | 0,00028532 | 0,00181348 |
| XM_486686   | chrX  | 56391894  | 56393032  | LOC434782    | 0,40576322 | 0,01131664 | 0,01627346 |
| XM_977739   | chr10 | 72491949  | 72879420  | LOC432471    | 0,40570978 | 0,00469477 | 0,00852321 |
| BC100346    | chr7  | 107398020 | 107539759 | Ppfibp2      | 0,40557576 | 0,00096809 | 0,00329657 |
| BC038272    | chr14 | 32148859  | 32199025  | Arhgap22     | 0,40541274 | 0,00932816 | 0,01395245 |
| NM_138745   | chr12 | 77174247  | 77238643  | Mthfd1       | 0,40518425 | 0,00196277 | 0,00486369 |
| BC023444    | chr9  | 74635128  | 74639474  | Onecut1      | 0,40512715 | 0,00073915 | 0,00282146 |
| NM_008445   | chr12 | 3365131   | 3406494   | Kif3c        | 0,40496618 | 5,68E-05   | 0,00100585 |
| BC066875    | chr4  | 144676982 | 146428993 | N/A          | 0,40403626 | 0,00252372 | 0,00563115 |
| NM_00101381 | chr7  | 68174345  | 68236602  | LOC434197    | 0,40380108 | 0,0076848  | 0,01207591 |
| BC068151    | chrX  | 22850075  | 22962952  | Wdr44        | 0,40376376 | 0,00098892 | 0,00332851 |
| NM_011610   | chr4  | 144479054 | 144513557 | Tnfrsf1b     | 0,40332181 | 0,0065739  | 0,01075919 |
| BC048405    | chr18 | 25622476  | 25896993  | Pip5kl1      | 0,4030619  | 0,00116245 | 0,00362287 |
| NM_023121   | chr11 | 95658759  | 95661819  | Gngt2        | 0,40289245 | 0,01180286 | 0,01683058 |
| AK143849    | chr15 | 79716786  | 79720375  | D730005E14R  | 0,40284218 | 0,00322676 | 0,00658044 |
| XM_987409   | chr4  | 150920085 | 150922862 | LOC666980    | 0,40270352 | 0,00221605 | 0,00516703 |
| AK133244    | chr2  | 32396805  | 32405783  | Pip5kl1      | 0,40242077 | 0,00425212 | 0,00794037 |
| NM_177374   | chr12 | 112125950 | 112131708 | 6720458F09Ri | 0,40242077 | 0,00337492 | 0,00675892 |
| NM_198412   | chr4  | 101048525 | 101140731 | Dnajc6       | 0,40220883 | 0,01233459 | 0,01743866 |
| BC010980    | chr1  | 155502588 | 155507682 | Rgs16        | 0,40207318 | 0,00934019 | 0,01396345 |
| NM_027153   | chrX  | 159613541 | 159717010 | Pir          | 0,40183821 | 0,00113928 | 0,00358363 |
| NM_197889   | chr4  | 88253361  | 88254823  | Ifnz         | 0,40180015 | 0,00190054 | 0,00476093 |
| XM_283704   | chr2  | 21098484  | 21123119  | 4933434I06Ri | 0,40154679 | 0,00575405 | 0,00976812 |
| NM_008788   | chr5  | 137834896 | 137841156 | Pcolce       | 0,4014568  | 0,0025934  | 0,00573298 |
| BC109154    | chr1  | 82892823  | 82917455  | Slc19a3      | 0,40139002 | 0,00450593 | 0,00825834 |
| NM_053178   | chr9  | 54403133  | 54460022  | Acsbg1       | 0,40125186 | 0,00276991 | 0,00595107 |
| BC065049    | chr3  | 89320106  | 89330853  | Trim46       | 0,40100533 | 0,00017422 | 0,00145326 |
| NM_011053   | chr19 | 47144076  | 47184457  | Pdcd11       | 0,40099144 | 0,00058878 | 0,00252179 |
| NM_021882   | chr10 | 128109206 | 128123073 | Scd          | 0,40049145 | 0,00124934 | 0,00376381 |
| NM_007506   | chr11 | 95884941  | 95891127  | Atp5g1       | 0,40029625 | 0,00813664 | 0,01258747 |
| NM_011829   | chr6  | 29150449  | 29162281  | Impdh1       | 0,40026018 | 0,00132991 | 0,00390779 |
| BC012697    | chr7  | 100367463 | 100373707 | Ucp2         | 0,40010762 | 0,00070378 | 0,00277078 |
| NM_178935   | chrX  | 158123023 | 158173504 | 4932441K18R  | 0,39966782 | 0,0088135  | 0,01331949 |
| NM_199447   | chr19 | 41916161  | 41949464  | AA408556     | 0,3993789  | 0,0000846  | 0,0030239  |
| AK028464    | chr18 | 61423878  | 61525769  | Ppargc1b     | 0,39884221 | 0,01021356 | 0,01502424 |
| NM_183175   | chr14 | 59722243  | 59734978  | C1qtnf9      | 0,39862018 | 0,0053967  | 0,0093748  |

|             |       |           |           |             |            |            |            |
|-------------|-------|-----------|-----------|-------------|------------|------------|------------|
| NM_007626   | chr15 | 102540251 | 103043321 | Cbx5        | 0,39854006 | 0,00073169 | 0,00280068 |
| BC045159    | chr7  | 119977535 | 119993098 | Crym        | 0,39800634 | 0,00207436 | 0,00498443 |
| BC092251    | chr6  | 69578400  | 69578941  | N/A         | 0,39786567 | 0,00310493 | 0,00639874 |
| AK132721    | chr2  | 180566873 | 180571755 | Tcfl5       | 0,39772689 | 0,00554102 | 0,0095462  |
| NM_153062   | chr17 | 31024192  | 31079419  | Slc37a1     | 0,39691445 | 0,00041351 | 0,00212047 |
| AK151551    | chr12 | 113209483 | 113216765 | Pld4        | 0,39665959 | 0,0037053  | 0,00723109 |
| BC018383    | chr19 | 47068008  | 47077655  | Ina         | 0,39634078 | 0,00263249 | 0,00578721 |
| BC003422    | chr15 | 3976723   | 4103963   | Oxct1       | 0,39624739 | 0,00012861 | 0,00131739 |
| BC027535    | chr1  | 75155349  | 75161491  | Resp18      | 0,39616592 | 0,00804244 | 0,01248502 |
| XM_143529   | chr3  | 129780312 | 129795955 | Gm421       | 0,39598198 | 0,00419261 | 0,00786295 |
| NM_145508   | chr1  | 132955986 | 132965780 | Dyrk3       | 0,39555129 | 0,00536358 | 0,00933927 |
| NM_029609   | chr7  | 132448985 | 132544762 | 2310007H09R | 0,39554032 | 0,00795005 | 0,01238198 |
| AK152193    | chr11 | 53613473  | 53621797  | Irf1        | 0,39521967 | 0,00210619 | 0,00501057 |
| XM_984267   | chrX  | 56397784  | 56398291  | LOC666500   | 0,39512198 | 0,00344869 | 0,00685225 |
| AK158337    | chr7  | 49172158  | 49279427  | N/A         | 0,39491936 | 0,00077512 | 0,00290416 |
| XM_896714   | chr9  | 57345803  | 57350896  | Mpi1        | 0,39489108 | 0,00042584 | 0,00216811 |
| NM_146228   | chr9  | 110724989 | 110745340 | Als2cl      | 0,39477248 | 0,00587598 | 0,00991301 |
| BC014759    | chr3  | 137870073 | 137918932 | Dapp1       | 0,39443788 | 0,00295613 | 0,00622333 |
| AK165765    | chr11 | 34261958  | 34531902  | Dock2       | 0,39372585 | 1,11E-05   | 0,00056681 |
| NM_178729   | chr5  | 44044153  | 44070344  | Fbx15       | 0,3927936  | 0,00071483 | 0,00258211 |
| BC052885    | chr17 | 84099873  | 84277093  | Thada       | 0,39261576 | 0,00032906 | 0,00193339 |
| NM_00101381 | chr14 | 50474740  | 50584904  | LOC434459   | 0,39239448 | 0,00218038 | 0,00511243 |
| BC059280    | chr4  | 11259081  | 11311518  | Rbm35a      | 0,39236547 | 0,00055088 | 0,00242028 |
| XM_357336   | chr4  | 145335503 | 145372823 | LOC383940   | 0,3923419  | 0,00110541 | 0,00252118 |
| AK136770    | chr5  | 8428863   | 8460795   | B230315F11R | 0,39124928 | 0,00130532 | 0,00386602 |
| NM_172693   | chr4  | 47113052  | 47144142  | Galnt12     | 0,39087973 | 0,00712681 | 0,01137618 |
| BC100320    | chr5  | 139658921 | 139669262 | C130050O18R | 0,39080116 | 0,00047963 | 0,00230991 |
| BC008555    | chr6  | 42552629  | 42574661  | BC011487    | 0,39073255 | 0,00157859 | 0,00428382 |
| NM_030556   | chr1  | 82892820  | 82917472  | Slc19a3     | 0,39044827 | 0,00200178 | 0,00490922 |
| BC031498    | chr6  | 70145438  | 70656544  | N/A         | 0,39037972 | 0,00566395 | 0,00968909 |
| AK016883    | chr3  | 135285435 | 135311861 | 4933425K02R | 0,39031929 | 0,01253705 | 0,0176746  |
| NM_00103946 | chr3  | 89320103  | 89331126  | Trim46      | 0,39025527 | 0,00060336 | 0,00253756 |
| BC106161    | chr6  | 69114402  | 69114944  | N/A         | 0,3900984  | 0,00504729 | 0,00895593 |
| BC048235    | chr11 | 64795295  | 64818264  | Elac2       | 0,38984882 | 0,00225979 | 0,00523414 |
| BC002082    | chr4  | 129811051 | 129817762 | Fabp3       | 0,38954359 | 0,00284963 | 0,00606462 |
| BC016602    | chr11 | 115824615 | 115828798 | Galk1       | 0,38940051 | 0,00051974 | 0,00236543 |
| XM_620070   | chr4  | 88256194  | 88257750  | LOC545649   | 0,38939961 | 0,00208546 | 0,0049979  |
| BC034276    | chr11 | 88815529  | 88836383  | Trim25      | 0,38932584 | 0,00785835 | 0,01228955 |
| NM_010100   | chr10 | 57996145  | 58071053  | Edar        | 0,38901472 | 0,00079884 | 0,00294539 |
| BC058996    | chr7  | 25377901  | 25383875  | A830041P22R | 0,38884758 | 0,00697097 | 0,01120323 |
| AK014435    | chr17 | 8122633   | 8135668   | Brp44l      | 0,38848658 | 0,00255029 | 0,00566921 |
| BC108989    | chr3  | 36812753  | 36863152  | Trpc3       | 0,3881573  | 9,72E-05   | 0,00115857 |
| NM_022721   | chr1  | 64668688  | 64672026  | Fzd5        | 0,38741991 | 0,00027161 | 0,00176589 |
| NM_172845   | chr1  | 173087096 | 173096597 | Adamts4     | 0,38734294 | 8,87E-05   | 0,00112072 |
| NM_010921   | chr14 | 68144021  | 68147988  | Nkx3-1      | 0,38726419 | 0,00412144 | 0,00779519 |
| NM_009510   | chr17 | 6587788   | 6632438   | Vii2        | 0,38726329 | 0,00483461 | 0,00869763 |
| XM_980487   | chr7  | 67311161  | 6740810   | 2810409K11R | 0,38702715 | 0,01004875 | 0,01484039 |
| NM_177831   | chr18 | 77994014  | 78001944  | N/A         | 0,38635617 | 0,00575366 | 0,00976812 |
| BC065068    | chr14 | 22087945  | 22792757  | Cnma1       | 0,38585392 | 0,00020888 | 0,00128684 |
| BC106159    | chr6  | 69578400  | 69578948  | N/A         | 0,3858147  | 0,00336935 | 0,00675457 |
| AK141034    | chr8  | 87802012  | 87827464  | Mast1       | 0,38571041 | 0,00032947 | 0,00193339 |
| BC048491    | chr19 | 45801162  | 45802897  | Npm3        | 0,38553667 | 0,00213772 | 0,0050356  |
| NM_011578   | chr5  | 107346871 | 107529822 | Tgfbf3      | 0,38522147 | 0,01076022 | 0,01565214 |
| NM_144953   | chr1  | 52869671  | 52897385  | 1700019D03R | 0,38521702 | 0,00010615 | 0,00120915 |
| NM_026340   | chr15 | 34439911  | 34475226  | Pop1        | 0,38469047 | 5,84E-05   | 0,00101087 |
| NM_182716   | chr1  | 134397531 | 134569311 | Nfasc       | 0,38432889 | 0,00055618 | 0,00243177 |
| NM_031396   | chr19 | 43494521  | 43549074  | Cnm1        | 0,38429781 | 0,00166995 | 0,0044425  |
| NM_027227   | chrX  | 7161159   | 7175451   | 2010001H14R | 0,38392152 | 0,00071983 | 0,00278211 |
| BC024864    | chr11 | 97852713  | 97869458  | Stac2       | 0,38384258 | 0,01319068 | 0,01843911 |
| D13802      | chr16 | 92494358  | 92584866  | Runx1       | 0,38354914 | 0,00022638 | 0,00163005 |
| AK144068    | chr16 | 17985439  | 18002721  | Prodh       | 0,38330995 | 0,00039601 | 0,00207104 |
| AK154323    | chr19 | 6341232   | 6355301   | Map4k2      | 0,38329489 | 0,00018666 | 0,00149582 |
| NM_028030   | chr9  | 65428587  | 65458524  | Rbpms2      | 0,38312047 | 0,00569378 | 0,00971672 |
| BC065789    | chr7  | 132449009 | 132508952 | 2310007H09R | 0,38242268 | 0,00794246 | 0,01237339 |
| BC055906    | chr6  | 67825749  | 67826217  | N/A         | 0,3823573  | 0,01295021 | 0,01816258 |
| XM_125673   | chr10 | 62207058  | 62275371  | Cxxc6       | 0,38221775 | 4,02E-05   | 0,00088495 |
| BC050151    | chr11 | 115824547 | 115828780 | Galk1       | 0,38213033 | 0,00071984 | 0,00278211 |
| XM_981054   | chr12 | 70466380  | 70467944  | LOC666026   | 0,38209678 | 0,00359941 | 0,00707074 |
| NM_011638   | chr16 | 32528767  | 32552537  | Tfrc        | 0,38204293 | 0,00795468 | 0,01238272 |
| AK163689    | chr17 | 70427037  | 70692249  | Dlgap1      | 0,38203057 | 0,00066653 | 0,0026795  |
| AK051360    | chr1  | 54499147  | 54502172  | D230012E17R | 0,38187702 | 0,00421282 | 0,00788845 |
| DQ358971    | chrX  | 147953194 | 148110177 | Apxl        | 0,38185231 | 0,0007893  | 0,00293015 |
| NM_183037   | chr3  | 89320103  | 89331824  | Trim46      | 0,38178262 | 7,69E-06   | 0,00054145 |
| NM_008576   | chr16 | 14275137  | 14388453  | Abcc1       | 0,38161241 | 0,00024474 | 0,00169467 |
| AK047179    | chr9  | 4662301   | 4796205   | Gria4       | 0,38125284 | 0,00012848 | 0,00131739 |
| XM_620075   | chr4  | 88270805  | 88272358  | LOC545654   | 0,38124315 | 0,00074398 | 0,0028303  |

|             |       |           |           |              |            |            |            |
|-------------|-------|-----------|-----------|--------------|------------|------------|------------|
| BC051231    | chr19 | 47182086  | 47184454  | Pdcd11       | 0,38115948 | 0,00257418 | 0,00570318 |
| BC006926    | chr13 | 6580425   | 6647956   | Pfkp         | 0,38108639 | 0,00312814 | 0,00643102 |
| BC083145    | chrX  | 49232828  | 49266276  | Hprt1        | 0,38080298 | 0,00034572 | 0,00197119 |
| NM_010174   | chr4  | 129811081 | 129817767 | Fabp3        | 0,38017178 | 0,00446851 | 0,00821753 |
| XM_620069   | chr4  | 88250335  | 88251891  | LOC545648    | 0,3800137  | 0,00229028 | 0,00527298 |
| NM_013682   | chr17 | 8234802   | 8260902   | T2           | 0,37931895 | 0,00103013 | 0,00338102 |
| XM_898235   | chr10 | 23513902  | 23517384  | 1110021L09Ri | 0,37889062 | 3,24E-05   | 0,00083399 |
| BC069929    | chr16 | 92494092  | 92714551  | Runx1        | 0,37831153 | 0,00135655 | 0,00395876 |
| XM_895133   | chr2  | 166726997 | 166754970 | AI481105     | 0,37816734 | 0,00199698 | 0,00490922 |
| NM_009097   | chr4  | 133119369 | 133159860 | Rps6ka1      | 0,37813938 | 0,00688324 | 0,01110032 |
| BC094931    | chr17 | 24256664  | 24261255  | Rab26        | 0,37809308 | 0,00022764 | 0,00163713 |
| BC025002    | chr3  | 135285492 | 135312065 | 4933425K02R  | 0,37790705 | 0,00053163 | 0,00239637 |
| NM_007633   | chr7  | 37806743  | 37816090  | Ccne1        | 0,37781538 | 0,0002395  | 0,0016811  |
| NM_016905   | chr11 | 115824615 | 115828768 | Galk1        | 0,37781363 | 0,00815205 | 0,01259904 |
| NM_00102461 | chr5  | 98569605  | 99042321  | 1700007G11R  | 0,37764869 | 0,00060156 | 0,00253756 |
| NM_00103319 | chr1  | 64664874  | 64668687  | AI427138     | 0,37759285 | 0,0001184  | 0,00126506 |
| BC096593    | chr4  | 144937383 | 144971122 | Rex2         | 0,3775344  | 0,00208567 | 0,0049979  |
| NM_175272   | chr7  | 49232741  | 49322663  | 5330421F07Ri | 0,37729285 | 0,00039047 | 0,00206196 |
| NM_009380   | chr14 | 16774841  | 16827040  | Thrb         | 0,37719784 | 0,00283198 | 0,00603657 |
| NM_009597   | chr15 | 99498751  | 99529751  | Accn2        | 0,37709589 | 0,00029107 | 0,00282669 |
| AK016341    | chr18 | 35785990  | 35788130  | 5133400G04R  | 0,37662744 | 0,00439187 | 0,00812925 |
| NM_009447   | chr1  | 75098121  | 75102401  | Tube4        | 0,37625257 | 0,0001905  | 0,00149871 |
| BC055895    | chr7  | 43666104  | 43671864  | Slk8         | 0,3761952  | 0,0004222  | 0,00215325 |
| NM_172980   | chr2  | 122117917 | 122152571 | KLC28a2      | 0,37614653 | 0,00813689 | 0,01258747 |
| BC086490    | chr4  | 99427489  | 99485226  | Pgm2         | 0,37613697 | 0,00035301 | 0,00199391 |
| AK005158    | chr17 | 43031763  | 43070687  | Pla2g7       | 0,37589718 | 0,00615026 | 0,01024241 |
| NM_019739   | chr3  | 52356302  | 52437467  | Foxo1        | 0,37519868 | 0,00087206 | 0,00307971 |
| NM_008723   | chr19 | 45801044  | 45802874  | Npm3         | 0,37477934 | 0,00158993 | 0,00430088 |
| NM_175289   | chr11 | 51494378  | 51501103  | D930048N14R  | 0,37467112 | 0,00022996 | 0,00164678 |
| NM_026940   | chr16 | 17060541  | 17062406  | 1810015A11R  | 0,37403366 | 9,11E-05   | 0,00112955 |
| NM_145434   | chr11 | 98584021  | 98590912  | Nr1d1        | 0,37396194 | 0,00458823 | 0,00836392 |
| AK162667    | chr7  | 28843692  | 28858076  | Rasgrp4      | 0,37369591 | 0,00835805 | 0,01279679 |
| NM_011267   | chr1  | 155502565 | 155507684 | Rgs16        | 0,37308511 | 0,00721045 | 0,01147589 |
| NM_00100391 | chr10 | 126699174 | 126714588 | Mars         | 0,37296617 | 0,00039447 | 0,00207029 |
| XM_895740   | chr14 | 100616518 | 100820127 | Lmo7         | 0,37282401 | 0,00560775 | 0,00962389 |
| NM_021424   | chr9  | 43495570  | 43558456  | Pvrl1        | 0,37272238 | 0,00060288 | 0,00253756 |
| XM_897464   | chr9  | 58157851  | 58160192  | Tbc1d21      | 0,37263196 | 0,00792737 | 0,0123531  |
| NM_008042   | chr17 | 17675075  | 17676295  | Fprl1        | 0,37252608 | 0,01338141 | 0,01867071 |
| AK151793    | chr1  | 9783364   | 9885062   | Sgk3         | 0,3724099  | 0,00121392 | 0,0037101  |
| AK053152    | chr11 | 79970313  | 79995119  | Centa2       | 0,37232215 | 0,000231   | 0,00164938 |
| NM_025903   | chr9  | 107445818 | 107451139 | Ifrd2        | 0,37213294 | 0,00038121 | 0,00205423 |
| NM_00103330 | chr3  | 95963907  | 95967633  | Gm129        | 0,37206588 | 0,00216672 | 0,00508782 |
| NM_009898   | chr7  | 126490921 | 126495902 | Coro1a       | 0,37205299 | 0,00028635 | 0,00181621 |
| NM_198191   | chr2  | 32397827  | 32405788  | Pip5k1l      | 0,37204095 | 1,62E-05   | 0,00063799 |
| XM_620076   | chr4  | 88273739  | 88275295  | LOC545655    | 0,37202462 | 0,00496786 | 0,00885983 |
| XM_981618   | chr14 | 40138179  | 40173819  | LOC666099    | 0,37185361 | 0,01374214 | 0,01904921 |
| NM_023479   | chr11 | 64795291  | 64818264  | Elac2        | 0,37184759 | 0,00292767 | 0,00618253 |
| NM_172134   | chr10 | 77842098  | 77868104  | Pdxk         | 0,37104258 | 0,00136177 | 0,00396237 |
| NM_177233   | chr6  | 96796671  | 97025874  | C130034I18Ri | 0,37064244 | 0,00252698 | 0,00056342 |
| NM_013556   | chrX  | 49232763  | 49266286  | Hprt1        | 0,37054997 | 0,00168624 | 0,00445629 |
| XM_986678   | chr2  | 28873905  | 28877068  | 1700101E01R  | 0,37047463 | 0,00102147 | 0,00337061 |
| NM_007669   | chr17 | 28821438  | 28828386  | Cdkn1a       | 0,37040787 | 0,00848067 | 0,0129389  |
| NM_178766   | chr5  | 8428843   | 8465984   | B230315F11R  | 0,37001098 | 0,00305894 | 0,00634786 |
| NM_145391   | chr6  | 125189823 | 125197479 | Tapbp1       | 0,36991781 | 0,00100912 | 0,00336247 |
| AK090023    | chrX  | 159613677 | 159653882 | Pir          | 0,36984944 | 0,00067122 | 0,00268938 |
| BC016266    | chr1  | 136222191 | 136228136 | Cyb5r1       | 0,36973581 | 0,00230895 | 0,00530275 |
| AK085740    | chr3  | 135763040 | 135797165 | Slc39a8      | 0,36885269 | 0,00147516 | 0,00412326 |
| AK045826    | chr19 | 6530710   | 6532011   | N/A          | 0,3684115  | 0,00379987 | 0,00737942 |
| NM_011671   | chr7  | 100367445 | 100376102 | Ucp2         | 0,36835618 | 0,0021152  | 0,00501981 |
| NM_030716   | chr19 | 45846980  | 45869114  | Kcnip2       | 0,36834511 | 0,00019885 | 0,0015238  |
| AK153745    | chr2  | 11439559  | 11448689  | N/A          | 0,36792238 | 0,00032865 | 0,00193339 |
| AK010953    | chr10 | 62207705  | 62208955  | Cxxc6        | 0,36760289 | 0,00017301 | 0,00145326 |
| NM_009287   | chr7  | 102141644 | 102310681 | Stim1        | 0,36728367 | 0,00020209 | 0,00153257 |
| NM_026821   | chr4  | 80381916  | 80425532  | D4Bwg0951e   | 0,36710127 | 2,72E-05   | 0,00080751 |
| NM_00103910 | chr5  | 136368658 | 136396487 | Rasa4        | 0,36707243 | 0,00168366 | 0,00445143 |
| NM_00102413 | chr7  | 118935471 | 118975523 | Gpr139       | 0,36706734 | 0,00950795 | 0,01416452 |
| NM_016789   | chr5  | 144799429 | 144811005 | Nptx2        | 0,36706395 | 0,01434498 | 0,01971979 |
| NM_199022   | chr2  | 125318887 | 125415589 | Lhc4         | 0,3669605  | 0,003572   | 0,00704422 |
| XM_898388   | chr6  | 50039871  | 50043547  | LOC624524    | 0,36668081 | 0,00804575 | 0,01248517 |
| BC094470    | chr4  | 133119369 | 133159826 | Rps6ka1      | 0,36618976 | 0,00301154 | 0,00629111 |
| NM_009051   | chr4  | 145896305 | 145904594 | Rex2         | 0,36595547 | 0,00120171 | 0,00369498 |
| XM_983398   | chr1  | 37082297  | 37087622  | LOC666368    | 0,36583796 | 0,00258659 | 0,0057243  |
| XM_489612   | chr16 | 90640385  | 90699251  | 4921511H13R  | 0,36566472 | 0,00363332 | 0,0071256  |
| NM_021469   | chr6  | 83985175  | 84176489  | Dysf         | 0,36539784 | 0,00058496 | 0,00251181 |
| NM_013737   | chr17 | 43031499  | 43075242  | Pla2g7       | 0,36479133 | 0,0023934  | 0,00542978 |
| NM_00103793 | chr15 | 54963518  | 55084285  | Depdc6       | 0,36476604 | 0,00453041 | 0,00828537 |

|             |       |           |           |              |            |            |            |
|-------------|-------|-----------|-----------|--------------|------------|------------|------------|
| BC027418    | chr6  | 68634088  | 68634575  | N/A          | 0,3646784  | 0,01090389 | 0,01583268 |
| AK035939    | chr17 | 8179213   | 8181525   | 9630019K15R  | 0,36451666 | 0,00211392 | 0,00501921 |
| XM_902831   | chr2  | 174704487 | 174710720 | LOC664987    | 0,36434152 | 0,00082236 | 0,00297684 |
| NM_028325   | chrX  | 32627432  | 32630595  | Zcchc12      | 0,36433142 | 0,00026873 | 0,00175615 |
| NM_027872   | chr5  | 148188800 | 148205164 | 1200006F02Ri | 0,36422622 | 0,00152014 | 0,00419005 |
| XM_620067   | chr4  | 88244479  | 88246035  | LOC545646    | 0,36393432 | 0,00172804 | 0,00450286 |
| XM_620074   | chr4  | 88267882  | 88269438  | LOC545653    | 0,36381746 | 0,00392648 | 0,00756127 |
| BC049076    | chr4  | 133119368 | 133159824 | Rps6ka1      | 0,36375358 | 0,002389   | 0,00542805 |
| NM_172805   | chr12 | 75816059  | 76096172  | Kcni5        | 0,36313721 | 0,00921074 | 0,01380801 |
| NM_013545   | chr6  | 124686335 | 124698725 | Ptpn6        | 0,36300467 | 0,00142903 | 0,00405723 |
| BC035551    | chr10 | 43639051  | 43686310  | Aim1         | 0,36286547 | 0,00120335 | 0,00369814 |
| NM_199305   | chr4  | 129178658 | 129199142 | Tmem39b      | 0,36267771 | 0,00105102 | 0,0034148  |
| BC003211    | chr10 | 80473255  | 80477984  | Thop1        | 0,36248587 | 0,00152001 | 0,00419005 |
| AK050714    | chr10 | 76476996  | 76489984  | Slc19a1      | 0,36242557 | 0,00336324 | 0,00675104 |
| BC067063    | chr7  | 88153351  | 88185503  | Ctsc         | 0,36141125 | 0,00745361 | 0,01178425 |
| NM_016658   | chr4  | 41944014  | 41947191  | Galt         | 0,36086805 | 0,0030912  | 0,00638369 |
| NM_009822   | chr4  | 13711928  | 13818264  | Runx1t1      | 0,36059301 | 0,00708758 | 0,01133599 |
| NM_010218   | chr2  | 102250204 | 102252631 | Fjx1         | 0,36057635 | 0,00249079 | 0,00557645 |
| NM_178911   | chr12 | 113208462 | 113216794 | Pld4         | 0,36049804 | 0,00059036 | 0,00252491 |
| NM_008067   | chrX  | 68686536  | 68908906  | Gabra3       | 0,36018916 | 0,00561405 | 0,00263193 |
| NM_053073   | chr4  | 107300192 | 107370305 | Lrp8         | 0,36016752 | 1,74E-05   | 0,00063933 |
| XM_987981   | chr17 | 7212472   | 7235122   | LOC667055    | 0,3596694  | 0,01173945 | 0,01675618 |
| NM_028696   | chr1  | 51413234  | 51422944  | 5830411E10R  | 0,3595564  | 0,00798586 | 0,01241504 |
| NM_177823   | chr17 | 30939124  | 30970800  | Ubash3a      | 0,35860811 | 0,01010064 | 0,01489488 |
| AK040931    | chr12 | 81945655  | 82103558  | Smoc1        | 0,35838281 | 0,00200964 | 0,00492053 |
| BC004686    | chrX  | 49232789  | 49266287  | Hprt1        | 0,35800211 | 0,00034462 | 0,00196835 |
| NM_025522   | chr12 | 73569193  | 73583620  | Dhrs7        | 0,35750533 | 0,00930806 | 0,01392588 |
| AK166082    | chr5  | 107388281 | 107529897 | Tgfb3        | 0,35692512 | 0,0003769  | 0,00204961 |
| AK035025    | chrX  | 49971744  | 49992333  | Xlr          | 0,35659046 | 0,00128289 | 0,00383096 |
| NM_015747   | chr2  | 128890240 | 128903050 | Slc20a1      | 0,35647513 | 6,03E-05   | 0,00102208 |
| XM_895694   | chr14 | 100727265 | 100799283 | Lmo7         | 0,35616064 | 0,00033304 | 0,0019437  |
| NM_172665   | chr2  | 71674062  | 71702840  | Pdk1         | 0,35595744 | 0,00025025 | 0,00170185 |
| XM_00100160 | chr19 | 45796033  | 45796569  | LOC668465    | 0,35554482 | 0,00136506 | 0,00396613 |
| BC028925    | chr6  | 67539304  | 67540084  | N/A          | 0,35547007 | 0,00683581 | 0,01104773 |
| NM_028132   | chr4  | 99427438  | 99485223  | Pgm2         | 0,355452   | 0,00182547 | 0,00465502 |
| NM_008580   | chr10 | 19623887  | 19831139  | Map3k5       | 0,35538713 | 0,00359928 | 0,00170704 |
| XM_899178   | chr17 | 25930562  | 25931909  | Rgs11        | 0,3553354  | 0,01157717 | 0,01655627 |
| XM_357091   | chr1  | 13098641  | 13112377  | Prdm14       | 0,35518109 | 0,0129823  | 0,01819475 |
| AB022913    | chr9  | 4420119   | 4795519   | Gria4        | 0,35515483 | 0,00648109 | 0,0106447  |
| NM_007771   | chr10 | 84561498  | 84614853  | Cry1         | 0,3549071  | 9,09E-05   | 0,00112955 |
| AK134015    | chr9  | 110737926 | 110740715 | N/A          | 0,35479396 | 0,00043643 | 0,00220558 |
| NM_021324   | chr7  | 3722672   | 3738432   | Ttyh1        | 0,35452272 | 0,00427715 | 0,00797385 |
| AK016508    | chr14 | 58996550  | 59151289  | Atp8a2       | 0,35425988 | 0,0116586  | 0,01666073 |
| BC048482    | chr16 | 29129937  | 29148120  | Hrasls       | 0,35374051 | 0,00206581 | 0,00497429 |
| XM_898363   | chr13 | 76172804  | 76230242  | Ell2         | 0,35369801 | 0,00024689 | 0,00169777 |
| AY189949    | chrX  | 89927993  | 89999907  | Pcyt1b       | 0,35357953 | 0,01103114 | 0,01596659 |
| NM_025519   | chr3  | 10349504  | 10373537  | 2310010I16Ri | 0,35350847 | 0,00262262 | 0,00577829 |
| NM_008207   | chr17 | 35613747  | 35643404  | H2-T24       | 0,35348233 | 0,00059341 | 0,00252703 |
| BC092064    | chr6  | 68200072  | 68200842  | N/A          | 0,35320475 | 0,00969827 | 0,01440164 |
| AK164574    | chr11 | 24067366  | 24068408  | N/A          | 0,35306768 | 0,00051074 | 0,00234954 |
| BC099472    | chr17 | 35638027  | 35640743  | H2-T23       | 0,35287521 | 0,00057602 | 0,00248678 |
| AK003902    | chr10 | 23515585  | 23517384  | 1110021L09Ri | 0,35240346 | 5,29E-05   | 0,00097654 |
| BC091754    | chr6  | 70144996  | 70656544  | N/A          | 0,35229763 | 0,00604395 | 0,01012192 |
| NM_029485   | chr18 | 35782663  | 35788113  | 5133400G04R  | 0,35204864 | 0,00068415 | 0,00272066 |
| XM_356184   | chr9  | 105848558 | 105887805 | 1110001D15R  | 0,35201773 | 0,0062368  | 0,01035761 |
| NM_183322   | chr1  | 21335064  | 21337350  | Ndg1         | 0,35177463 | 0,0141552  | 0,01951741 |
| AF260311    | chr10 | 3309339   | 3587948   | Oprm1        | 0,35171774 | 0,00575997 | 0,00977489 |
| BC079661    | chr13 | 56298264  | 56305927  | Cxcl14       | 0,35140745 | 0,00183832 | 0,00467466 |
| BC008512    | chr1  | 34404357  | 34418323  | Ptpn18       | 0,35132058 | 0,0032714  | 0,0066363  |
| XM_619714   | chr1  | 183346305 | 183348126 | 6530421E24R  | 0,35114529 | 0,00153697 | 0,00421167 |
| BC013525    | chr11 | 77696894  | 77709981  | Pipox        | 0,35095387 | 0,00413357 | 0,00779884 |
| XM_895767   | chr14 | 100725113 | 100821316 | Lmo7         | 0,35094252 | 0,00017971 | 0,0014688  |
| XM_984258   | chr4  | 145791938 | 145792328 | LOC666498    | 0,35062481 | 0,00554529 | 0,0095462  |
| AK053162    | chr11 | 53615703  | 53616618  | N/A          | 0,35024346 | 0,00295176 | 0,00621852 |
| AK034780    | chrX  | 54377793  | 54388516  | Zic3         | 0,35020542 | 0,00102657 | 0,00337399 |
| NM_145704   | chr19 | 45846980  | 45869114  | Kcni2        | 0,3498512  | 0,00015139 | 0,00138265 |
| BC052014    | chr13 | 58817928  | 58942070  | Ntrk2        | 0,34960555 | 0,00013699 | 0,00133239 |
| AF363737    | chr3  | 142638460 | 142681910 | Ccbl2        | 0,34925274 | 0,00056016 | 0,00244305 |
| BC064053    | chr5  | 135391544 | 135407283 | Mxipl        | 0,348968   | 0,01435424 | 0,01972797 |
| NM_00100417 | chr15 | 102098596 | 102102155 | LOC432988    | 0,34888255 | 0,00408257 | 0,00775415 |
| XM_976322   | chr1  | 167035571 | 167035862 | LOC665354    | 0,34785951 | 0,00228788 | 0,00527062 |
| BC022688    | chr7  | 28905674  | 28919844  | A230107C01R  | 0,34751649 | 0,01197876 | 0,01702163 |
| XM_890107   | chr7  | 104642131 | 104651291 | LOC625530    | 0,34714092 | 0,00787226 | 0,01230582 |
| BC023127    | chr15 | 74496338  | 74499814  | Arc          | 0,34710723 | 0,00714433 | 0,011395   |
| NM_172472   | chrX  | 6919675   | 6932158   | Tcfe3        | 0,34687794 | 0,00201659 | 0,00492338 |
| NM_178244   | chr1  | 155654009 | 155655276 | Teddm1       | 0,34650466 | 0,00416516 | 0,00783365 |

|             |             |           |           |              |            |            |            |
|-------------|-------------|-----------|-----------|--------------|------------|------------|------------|
| BC010318    | chr14       | 54494473  | 54502941  | Pck2         | 0,34649425 | 0,0024704  | 0,00554329 |
| AK131144    | chr6        | 83985046  | 84176717  | Dysf         | 0,34637259 | 0,00043679 | 0,00220558 |
| AK047949    | chr14       | 48234041  | 48447784  | Slc35f4      | 0,34595109 | 0,00156645 | 0,00426446 |
| NM_010580   | chr16       | 33749505  | 33868893  | Itg5         | 0,34507774 | 6,38E-05   | 0,00102744 |
| BC025932    | chr6        | 113449439 | 113459108 | Crel1        | 0,34434899 | 0,00047984 | 0,00230991 |
| XM_888199   | chrX        | 141237103 | 141237658 | LOC623713    | 0,34430364 | 0,00028815 | 0,00181987 |
| XM_909178   | chrX        | 107371061 | 107371412 | LOC634448    | 0,3438505  | 0,00904989 | 0,01360106 |
| NM_022316   | chr12       | 81945678  | 82105248  | Smoc1        | 0,34359398 | 0,00306968 | 0,00635909 |
| NM_133930   | chr6        | 113449345 | 113459115 | Crel1        | 0,34308469 | 0,00066913 | 0,00268282 |
| AK077828    | chr7        | 98711320  | 98729939  | Wnt11        | 0,34287707 | 0,00503586 | 0,00894365 |
| BC055376    | chr2        | 122132245 | 122152572 | Slc28a2      | 0,34255083 | 0,00017984 | 0,0014688  |
| BC046783    | chr6        | 85994380  | 86075100  | Add2         | 0,34236568 | 0,00011458 | 0,00124205 |
| AK032568    | chr5        | 110784656 | 110861677 | Galnt9       | 0,34151243 | 0,00344558 | 0,00684979 |
| NM_009864   | chr8        | 109492496 | 109559375 | Cdh1         | 0,34142091 | 0,01019758 | 0,01500815 |
| XM_895806   | chr3        | 5556165   | 5560726   | LOC620382    | 0,34140829 | 0,00326177 | 0,00662491 |
| AK031568    | chr9        | 4420146   | 4796205   | Gria4        | 0,34047639 | 0,00679233 | 0,01100838 |
| NM_021921   | chr15       | 89281898  | 89290214  | Mapk8ip2     | 0,34026642 | 0,0087041  | 0,01320275 |
| NM_013481   | chr15       | 76280250  | 76304524  | Bop1         | 0,34023104 | 0,00458879 | 0,00836392 |
| XM_984726   | chr4        | 146149408 | 146178341 | LOC666581    | 0,34018309 | 0,00078843 | 0,00293001 |
| BC058246    | chr16       | 33749447  | 33868892  | Itg5         | 0,34001572 | 1,08E-05   | 0,00056386 |
| BC012693    | chr15       | 76280250  | 76304488  | Bop1         | 0,33978012 | 0,00142286 | 0,0040492  |
| BC058163    | chr6        | 42175622  | 42180050  | Gstk1        | 0,33958234 | 0,00301026 | 0,00629111 |
| NM_011640   | chr11       | 69396175  | 69408066  | Trp53        | 0,33951644 | 0,00088979 | 0,00310958 |
| NM_008285   | chr6        | 114363530 | 114448891 | Hrh1         | 0,33920124 | 0,00568328 | 0,00970881 |
| NM_025659   | chr11       | 95648480  | 95658250  | Abi3         | 0,33888085 | 0,0073669  | 0,01166937 |
| M36778      | chr8        | 96700441  | 96846625  | Gnao1        | 0,33861943 | 0,00284223 | 0,00605408 |
| BC099527    | chr5        | 72482487  | 72508744  | Atp10d       | 0,33808705 | 0,0009112  | 0,0031531  |
| NM_130893   | chr15       | 76343463  | 76349157  | Scrt1        | 0,33755629 | 0,00164742 | 0,00439852 |
| NM_145620   | chr9        | 106335409 | 106343516 | Rnu3ip2      | 0,33672436 | 0,00630148 | 0,01042726 |
| XM_130346   | chr2        | 73142345  | 73183145  | Gpr155       | 0,33651203 | 0,00015047 | 0,00138265 |
| NM_008992   | chr12       | 85492400  | 85507118  | Abcd4        | 0,33640553 | 0,00015233 | 0,00138265 |
| NM_198607   | chr15       | 74548488  | 74551628  | 4930572J05Ri | 0,33638066 | 0,00607205 | 0,01015757 |
| BC022900    | chr15       | 98552403  | 98556186  | Fkbp11       | 0,33630839 | 8,57E-05   | 0,00112072 |
| AB038145    | chr2        | 131747721 | 131793000 | Slc23a2      | 0,33625245 | 0,00338567 | 0,00677361 |
| NM_00103967 | chr4        | 133615145 | 133624740 | Slc30a2      | 0,33615379 | 0,00676905 | 0,01099049 |
| NM_153800   | chr14       | 32045914  | 32199025  | Arhgap22     | 0,33586422 | 0,0030213  | 0,00630196 |
| BC108986    | chr5        | 21322846  | 21373822  | Slc26a5      | 0,33577033 | 0,0015554  | 0,00424212 |
| NM_010043   | chr1        | 75243491  | 75250864  | Des          | 0,33564933 | 0,00105072 | 0,0034148  |
| NM_010361   | chr10       | 75275600  | 75278002  | Gstt2        | 0,33545628 | 0,0054006  | 0,0093748  |
| NM_175408   | chr6        | 42191565  | 42194160  | Tmem139      | 0,33544621 | 0,0025015  | 0,00559379 |
| NM_133190   | chr7_random | 79965     | 100873    | Cacng8       | 0,33471536 | 0,00800512 | 0,0124385  |
| NM_009272   | chr4        | 147435312 | 147438419 | Srm          | 0,33452594 | 0,00212079 | 0,00502048 |
| XM_894444   | chr10       | 43638721  | 43747078  | Aim1         | 0,3340602  | 0,00426375 | 0,00795882 |
| NM_028979   | chr4        | 96060446  | 96083503  | Cyp2j9       | 0,33351341 | 0,01418615 | 0,01954401 |
| BC086653    | chr9        | 111219635 | 111240590 | Lba1         | 0,33321918 | 0,00185113 | 0,00468639 |
| NM_008390   | chr11       | 53613500  | 53620746  | Irf1         | 0,33271835 | 2,15E-05   | 0,00069344 |
| NM_024437   | chr8        | 117019591 | 117038282 | Nudt7        | 0,33235724 | 8,89E-05   | 0,00112072 |
| NM_031186   | chr3        | 123518187 | 123664414 | Ndst3        | 0,33200956 | 0,00768166 | 0,01207591 |
| BC027102    | chrX        | 102779358 | 102806202 | Cysltr1      | 0,33189528 | 0,01144216 | 0,01641043 |
| NM_173016   | chr8        | 117091616 | 117260047 | AI427515     | 0,33182857 | 0,00091058 | 0,0031531  |
| AK142528    | chr6        | 58570123  | 58594343  | Abcq2        | 0,3318278  | 0,00331679 | 0,00669648 |
| BC028760    | chr11       | 50079891  | 50081894  | Ltc4s        | 0,33154502 | 0,0019282  | 0,00481001 |
| NM_026964   | chr8        | 73797215  | 73802479  | 1810023B24R  | 0,33047354 | 0,00576895 | 0,00978272 |
| AK010301    | chr9        | 65427653  | 65458532  | Rbpms2       | 0,33018428 | 0,00406683 | 0,00773412 |
| NM_013872   | chr15       | 81778366  | 81788119  | Pmm1         | 0,32996693 | 2,93E-05   | 0,00083399 |
| BC080818    | chr6        | 54915225  | 54922425  | A030007L17Ri | 0,32975353 | 0,00178288 | 0,00458961 |
| XM_00100530 | chr3        | 131180997 | 131182121 | 6720418B01R  | 0,32949535 | 0,00980363 | 0,01453238 |
| AK143862    | chr11       | 117598747 | 117609173 | Tmc8         | 0,32928225 | 0,00324751 | 0,00660715 |
| AK145414    | chr4        | 45456209  | 45513942  | Shb          | 0,32928073 | 0,00010316 | 0,00118967 |
| NM_029556   | chr14       | 121316900 | 121537408 | Clybl        | 0,32909287 | 0,00105751 | 0,00342951 |
| NM_053273   | chr11       | 114491557 | 114537074 | Ttyh2        | 0,3290845  | 0,00021693 | 0,00159834 |
| NM_010408   | chr13       | 118721980 | 119096083 | Hcn1         | 0,32884888 | 0,01141034 | 0,01638016 |
| NM_018824   | chr2        | 131743936 | 131836549 | Slc23a2      | 0,32877291 | 0,00249288 | 0,00557904 |
| NM_172934   | chr16       | 33604212  | 33642660  | 4632417D23R  | 0,3286476  | 0,00088874 | 0,00310954 |
| NM_145431   | chr11       | 82716965  | 82724566  | Nle1         | 0,32858078 | 0,00048316 | 0,00231284 |
| NM_177915   | chrX        | 46037593  | 46042343  | Igsf1        | 0,32854282 | 0,01271766 | 0,01789537 |
| NM_145978   | chr14       | 68899297  | 68912752  | Pdlim2       | 0,32838269 | 0,00138718 | 0,00399408 |
| NM_130456   | chr1        | 158147411 | 158164712 | Nphs2        | 0,32791035 | 0,00449754 | 0,0082531  |
| BC031929    | chr15       | 7087763   | 7132560   | Lifr         | 0,32783005 | 0,01084147 | 0,0157574  |
| BC022608    | chr17       | 6525870   | 6587702   | Sytl3        | 0,32724128 | 0,00031827 | 0,00189521 |
| NM_00103336 | chr17       | 35243807  | 35251748  | Dpcr1        | 0,326339   | 0,00465052 | 0,00845574 |
| BC052899    | chrX        | 9874457   | 9876652   | Mid1ip1      | 0,32633825 | 0,00566524 | 0,00968909 |
| NM_177261   | chr7        | 139746157 | 139792859 | Kndc1        | 0,32604131 | 0,00322368 | 0,00657754 |
| NM_026524   | chrX        | 9874446   | 9876652   | Mid1ip1      | 0,32597728 | 0,00519978 | 0,00912871 |
| BC094603    | chr5        | 71850515  | 71937071  | Gabra4       | 0,32577324 | 0,00997941 | 0,01474528 |
| AF520774    | chr8        | 91541445  | 91578510  | Card15       | 0,32496585 | 0,0141876  | 0,01954401 |

|             |       |           |           |             |            |            |            |
|-------------|-------|-----------|-----------|-------------|------------|------------|------------|
| NM_008371   | chr3  | 7555149   | 7596500   | I17         | 0,32495834 | 0,00016442 | 0,00142787 |
| BC057863    | chr4  | 132246302 | 132272602 | Fgr         | 0,32485849 | 0,00519738 | 0,00912871 |
| BC062250    | chr10 | 75392047  | 75393363  | Vpreb3      | 0,32472192 | 0,00092046 | 0,00317395 |
| NM_144555   | chr6  | 31095685  | 31148596  | AB041803    | 0,32453291 | 0,00096853 | 0,00329657 |
| NM_013753   | chr10 | 60715018  | 60751393  | X99384      | 0,32451341 | 9,46E-05   | 0,00115067 |
| NM_024169   | chr15 | 98552401  | 98556232  | Fkbp11      | 0,32363436 | 0,00023205 | 0,00165486 |
| BC106102    | chr17 | 6538730   | 6587700   | Syt13       | 0,32340039 | 0,00160654 | 0,00433205 |
| NM_009659   | chr11 | 68973266  | 68985986  | Alox12b     | 0,32299864 | 0,00676439 | 0,01098891 |
| AK050966    | chr7  | 3729426   | 3740013   | Ttyh1       | 0,32283748 | 0,00650621 | 0,0106742  |
| NM_145470   | chr15 | 54942565  | 55082863  | Depdc6      | 0,32261602 | 0,00029053 | 0,00182576 |
| NM_175628   | chr6  | 121593573 | 121644846 | A2m         | 0,32216835 | 0,01011123 | 0,01489945 |
| XM_895954   | chr2  | 73151730  | 73187411  | Gpr155      | 0,32212964 | 0,00015649 | 0,00140094 |
| AK031794    | chrX  | 67475591  | 67558136  | Mtm1        | 0,32204927 | 0,00205675 | 0,00497067 |
| BC110553    | chr3  | 7555183   | 7596409   | I17         | 0,32202249 | 0,00063457 | 0,00261829 |
| AK017242    | chr7  | 107415147 | 107416338 | 5330417H12R | 0,32201356 | 0,00171323 | 0,00449545 |
| NM_031374   | chr8  | 35036478  | 35051520  | Tex15       | 0,3215957  | 0,00302287 | 0,00030196 |
| AK137362    | chr14 | 16827591  | 16829825  | Thrb        | 0,32084684 | 0,0064006  | 0,01055321 |
| NM_175938   | chr13 | 23485140  | 23496305  | Btn2a2      | 0,31990971 | 0,00876539 | 0,01326041 |
| BC006809    | chr15 | 81778364  | 81788124  | Pmm1        | 0,31984245 | 0,00023983 | 0,0016811  |
| NM_023245   | chr3  | 116910271 | 116960753 | Palm1       | 0,31941855 | 0,00318031 | 0,0065091  |
| NM_028175   | chr8  | 4226826   | 4236898   | Lrrc8e      | 0,31920607 | 5,54E-05   | 0,00099256 |
| NM_153154   | chr1  | 19088237  | 19151552  | Tcfap2d     | 0,31887657 | 0,00686119 | 0,01107675 |
| NM_145211   | chr5  | 121156872 | 121168124 | Oas1a       | 0,31796723 | 0,00595397 | 0,01000494 |
| NM_153389   | chr5  | 72482477  | 72590429  | Atp10d      | 0,31724075 | 0,00260808 | 0,00575262 |
| NM_182840   | chr2  | 160597878 | 160603769 | Emilin3     | 0,31704437 | 0,00298443 | 0,00625639 |
| AK011172    | chr8  | 117019617 | 117038283 | Nudt7       | 0,31657224 | 0,00049444 | 0,00233586 |
| BC004774    | chr15 | 54942406  | 55082863  | Depdc6      | 0,31655688 | 0,00010689 | 0,0012115  |
| NM_007756   | chr5  | 108758860 | 108790234 | Cplx1       | 0,31649691 | 0,00194527 | 0,00483641 |
| NM_0010338C | chr4  | 107303964 | 107320954 | B230314M03R | 0,31648594 | 0,00484135 | 0,00870449 |
| NM_007866   | chr7  | 28002335  | 28010544  | Dll3        | 0,31614391 | 1,66E-05   | 0,00063799 |
| BC098501    | chr8  | 109492507 | 109559368 | Cdh1        | 0,31583435 | 0,00317494 | 0,00650481 |
| NM_013670   | chr7  | 59862063  | 59884054  | Snrpn       | 0,31580443 | 2,68E-06   | 0,00048376 |
| BC109139    | chr2  | 170175312 | 170188335 | Cyp24a1     | 0,31540629 | 0,01169469 | 0,0167043  |
| NM_016669   | chr7  | 119977532 | 119993137 | Crym        | 0,3143877  | 0,00296006 | 0,00622721 |
| NM_009285   | chr14 | 67982567  | 67994944  | Stc1        | 0,31392025 | 0,01044114 | 0,01527234 |
| NM_145703   | chr19 | 45846980  | 45869114  | Cnrip2      | 0,31339339 | 6,50E-05   | 0,00102744 |
| BC030907    | chr2  | 92715949  | 92756562  | Syt13       | 0,31336733 | 0,00352974 | 0,00697525 |
| NM_009728   | chr7  | 58526200  | 58696660  | Atp10a      | 0,31292453 | 0,00024924 | 0,00170185 |
| AK034197    | chr7  | 51379059  | 51462379  | Tmem16e     | 0,31264919 | 0,0040724  | 0,00773976 |
| BC053055    | chr5  | 120940875 | 120971121 | Dtx1        | 0,31261451 | 0,01366937 | 0,01897039 |
| NM_011491   | chr11 | 31259440  | 31270061  | Stc2        | 0,31222688 | 0,00205738 | 0,00497067 |
| XM_898141   | chr19 | 10293060  | 10307793  | Gm98        | 0,3120401  | 0,00124122 | 0,00374691 |
| NM_019568   | chr13 | 56298265  | 56306173  | Cxcl14      | 0,31191468 | 0,00057215 | 0,00247543 |
| NM_007473   | chr4  | 41221747  | 41236641  | Aqp7        | 0,31174392 | 0,0131778  | 0,01842544 |
| BC019794    | chr14 | 14150786  | 14229772  | Lrrc3b      | 0,3097773  | 0,00019279 | 0,00150596 |
| NM_008052   | chr5  | 120940880 | 120972286 | Dtx1        | 0,30928526 | 0,01009961 | 0,01489488 |
| AK156393    | chr11 | 114491606 | 114535661 | Ttyh2       | 0,30922239 | 0,00085509 | 0,00304143 |
| NM_013819   | chr17 | 36878314  | 36882539  | H2-M3       | 0,30914666 | 0,00708832 | 0,01133599 |
| NM_198676   | chr13 | 66635498  | 66686453  | C330014B19R | 0,30782878 | 0,00018844 | 0,00149633 |
| NM_0010334E | chr8  | 124793922 | 124804518 | BC048644    | 0,30747834 | 0,00016621 | 0,00143051 |
| NM_00103333 | chr14 | 117366401 | 117589897 | Abcc4       | 0,30698995 | 0,00733802 | 0,01164164 |
| NM_009514   | chr10 | 75392027  | 75393362  | Vpreb3      | 0,30683253 | 0,00197203 | 0,00487783 |
| AK082922    | chrX  | 159613651 | 159688764 | Pir         | 0,30607632 | 0,00024948 | 0,00170185 |
| NM_146206   | chr7  | 145063312 | 145093317 | Tpcn2       | 0,30581619 | 9,67E-06   | 0,00055409 |
| AY659957    | chr16 | 6985319   | 7325131   | A2bp1       | 0,30557886 | 0,00197669 | 0,00487994 |
| NM_010464   | chr15 | 102749164 | 102756848 | Hoxc13      | 0,30517951 | 0,01176538 | 0,01678516 |
| NM_00100145 | chr7  | 3722735   | 3737083   | Ttyh1       | 0,30517105 | 8,60E-05   | 0,00112072 |
| NM_00101173 | chr2  | 152723292 | 152747216 | Xkr7        | 0,3047673  | 0,00489778 | 0,00878486 |
| NM_194055   | chr4  | 11259079  | 11311520  | Rbm35a      | 0,30452657 | 0,0010376  | 0,00340087 |
| NM_026296   | chr5  | 31762439  | 31764843  | 4930548H24R | 0,30446677 | 0,00380664 | 0,00738296 |
| NM_010133   | chr1  | 122430226 | 122435517 | En1         | 0,30431064 | 0,01100054 | 0,01594584 |
| NM_207208   | chr3  | 144890060 | 144912397 | Clca6       | 0,30410329 | 0,00546748 | 0,00946216 |
| AK089390    | chr8  | 91537488  | 91555805  | Card15      | 0,30371428 | 0,00159297 | 0,00430716 |
| NM_011510   | chr7  | 45972564  | 46048075  | Abcc8       | 0,30352628 | 0,01014943 | 0,01494834 |
| NM_145523   | chr2  | 62465165  | 62494948  | Gca         | 0,30293216 | 0,01229777 | 0,01740724 |
| BC010985    | chr4  | 41944042  | 41947191  | Galt        | 0,30271457 | 0,00307272 | 0,00636017 |
| XM_900454   | chr1  | 54599455  | 54602445  | Ankrd44     | 0,30269219 | 0,00852606 | 0,01299728 |
| XM_00100534 | chr9  | 111231159 | 111240591 | Lba1        | 0,30237274 | 0,0005148  | 0,00235553 |
| NM_007837   | chr10 | 126693758 | 126699235 | Ddit3       | 0,30195804 | 0,00059935 | 0,00253308 |
| AK158225    | chr2  | 154235839 | 154250294 | Apba2bp     | 0,30186945 | 0,00154168 | 0,00421821 |
| XM_899136   | chr17 | 25930579  | 25931575  | Rgs11       | 0,30095298 | 0,00432316 | 0,00803951 |
| BC052348    | chr7  | 29012735  | 29025645  | Neud4       | 0,30063398 | 0,00053338 | 0,00239637 |
| AY263385    | chrX  | 9874974   | 9876015   | Mid1ip1     | 0,30058606 | 0,0017337  | 0,0045058  |
| AK164998    | chr2  | 32397851  | 32405780  | Pip5kl1     | 0,30032782 | 3,42E-05   | 0,00083399 |
| AK048228    | chr16 | 32528729  | 32543488  | Tfrc        | 0,3001315  | 0,01252056 | 0,01765971 |
| NM_00103915 | chr15 | 78774978  | 78796097  | Triobp      | 0,30008019 | 0,00078877 | 0,00293001 |



|             |       |           |           |             |            |            |            |
|-------------|-------|-----------|-----------|-------------|------------|------------|------------|
| NM_207206   | chr2  | 112040679 | 112047950 | Agpat7      | 0,29957241 | 8,71E-05   | 0,00112072 |
| NM_175522   | chr5  | 140160416 | 140227196 | A930017N06R | 0,29921478 | 0,00166419 | 0,00441792 |
| AK159870    | chr8  | 77989689  | 77996661  | Hmox1       | 0,29896462 | 0,00736391 | 0,01166937 |
| AF155820    | chr3  | 55330507  | 55624596  | Dcamkl1     | 0,29774035 | 0,00013588 | 0,0013321  |
| NM_008439   | chr5  | 31198475  | 31207827  | Khk         | 0,2976867  | 0,00047684 | 0,00230382 |
| BC069843    | chr8  | 117019594 | 117038281 | Nudt7       | 0,29767019 | 6,03E-05   | 0,00102208 |
| XM_484312   | chr13 | 104476631 | 104479609 | LOC432800   | 0,29755948 | 0,00755998 | 0,01191451 |
| NM_028022   | chr11 | 4118253   | 4122412   | 2410008K03R | 0,29755811 | 0,00137816 | 0,00398091 |
| NM_011066   | chr1  | 93246387  | 93289702  | Per2        | 0,29752167 | 0,00524113 | 0,00918507 |
| BC025890    | chr7  | 145063448 | 145068445 | Tpcn2       | 0,29738422 | 0,0004119  | 0,00212047 |
| NM_009721   | chr1  | 166273941 | 166295030 | Atp1b1      | 0,29732033 | 0,00123435 | 0,00374691 |
| NM_010610   | chr14 | 22088572  | 22792482  | Kcnma1      | 0,29654371 | 4,24E-07   | 0,00029564 |
| AK133029    | chr17 | 35163288  | 35164966  | Cdsn        | 0,29646424 | 0,01422891 | 0,01958733 |
| NM_199252   | chr17 | 12951548  | 12974723  | Unc93a      | 0,29630605 | 0,0047178  | 0,0085494  |
| BC046310    | chr7  | 3722677   | 3738042   | Ttyh1       | 0,29597215 | 0,00111517 | 0,00353676 |
| NM_033174   | chr7  | 59867551  | 59884074  | Synrf       | 0,29572675 | 7,89E-05   | 0,00109904 |
| NM_021878   | chr13 | 44741874  | 44931953  | Jarid2      | 0,29544879 | 1,41E-05   | 0,00060233 |
| NM_00102485 | chr3  | 96682061  | 96685180  | Ankrd34     | 0,29460558 | 7,06E-05   | 0,00105565 |
| AK132256    | chr10 | 24463231  | 24525616  | Enpp3       | 0,29454909 | 0,00248251 | 0,00556418 |
| BC046628    | chr3  | 86631978  | 86634176  | Mab21l2     | 0,2942668  | 0,00628159 | 0,00104279 |
| AK139297    | chr3  | 33265467  | 33267905  | N/A         | 0,29422736 | 0,00070275 | 0,00277023 |
| NM_198604   | chr6  | 125328269 | 125346123 | Plekhhg6    | 0,29359311 | 0,00550843 | 0,00951094 |
| AK032103    | chr9  | 4478262   | 4796234   | Gria4       | 0,29298662 | 0,00516978 | 0,00910172 |
| XM_00100089 | chr5  | 19419342  | 19740605  | Magi2       | 0,292879   | 0,00470718 | 0,00854054 |
| BC004603    | chr11 | 113516689 | 113519465 | D11Ertd636e | 0,29281337 | 0,00034691 | 0,00197355 |
| NM_021546   | chr2  | 154235845 | 154247095 | Apba2bp     | 0,29226251 | 0,00174279 | 0,0045198  |
| NM_00103377 | chr18 | 38727507  | 38771896  | 9630014M24R | 0,29206944 | 0,00110196 | 0,00351706 |
| NM_008596   | chr3  | 108340321 | 108354655 | Synpl2      | 0,29173897 | 0,00118396 | 0,00366352 |
| AK051696    | chr14 | 67072613  | 67078173  | Nef3        | 0,2913025  | 0,00104372 | 0,00340917 |
| NM_177724   | chr1  | 180365799 | 180553175 | D230039L06R | 0,29099643 | 0,00227789 | 0,00526155 |
| NM_0010018C | chr17 | 84092249  | 84096273  | Zfp36l2     | 0,29092651 | 0,00110796 | 0,0035249  |
| BC021345    | chr15 | 98553771  | 98556164  | Fkbp11      | 0,29048723 | 0,0001512  | 0,00138265 |
| XM_145025   | chr6  | 127606780 | 127634746 | Gm462       | 0,28962673 | 3,01E-05   | 0,00083399 |
| AK081813    | chr11 | 68911448  | 68922653  | Per1        | 0,28940331 | 0,00194109 | 0,00483221 |
| BC002312    | chr2  | 164116689 | 164117565 | Sdc4        | 0,28924755 | 9,72E-05   | 0,00115857 |
| NM_198884   | chr6  | 120169428 | 120260178 | B4galnt3    | 0,28870473 | 0,00673127 | 0,01095002 |
| NM_007430   | chrX  | 82444493  | 82448663  | Nr0b1       | 0,28850402 | 0,00464479 | 0,00845048 |
| AK162641    | chr8  | 3516862   | 3538464   | Nte         | 0,28833409 | 0,00025043 | 0,00170185 |
| NM_019459   | chr7  | 30168975  | 30195476  | Nphs1       | 0,28769127 | 0,0086117  | 0,01310103 |
| NM_138948   | chr11 | 4638823   | 4646781   | Cabp7       | 0,28696433 | 0,00262632 | 0,00578046 |
| BC010778    | chrX  | 9875187   | 9876652   | Mid1ip1     | 0,28686423 | 0,00101758 | 0,00377046 |
| XM_976764   | chr3  | 28454287  | 28857018  | LOC665113   | 0,28658467 | 0,00508082 | 0,00900729 |
| NM_019511   | chr11 | 6558535   | 6577478   | Ramp3       | 0,28656745 | 0,00054552 | 0,00241342 |
| NM_008353   | chr8  | 73737482  | 73750411  | Il12rb1     | 0,28602107 | 0,00145668 | 0,00409142 |
| AK156629    | chr7  | 132597610 | 132651438 | A930008G19R | 0,28576412 | 0,00691245 | 0,01113675 |
| AF189770    | chr6  | 86051495  | 86084435  | Add2        | 0,2854566  | 0,00018599 | 0,00149294 |
| BC004828    | chr17 | 45048783  | 45057184  | Slc29a1     | 0,28445848 | 0,00010807 | 0,00121569 |
| AK171744    | chr11 | 88815852  | 88832298  | Trim25      | 0,28429028 | 0,00248635 | 0,00557069 |
| NM_146515   | chr17 | 36887553  | 36888471  | Olfr99      | 0,2839686  | 0,00174825 | 0,00452424 |
| AK006911    | chr7  | 29432327  | 29435792  | 1700067C01R | 0,28369055 | 0,0005633  | 0,00244958 |
| NM_053262   | chr5  | 104230066 | 104262098 | Dhrs8       | 0,28358242 | 0,0019556  | 0,00485197 |
| AK045556    | chr11 | 23980694  | 24073558  | Bcl11a      | 0,28340622 | 0,00038998 | 0,00206124 |
| BC061027    | chrX  | 7161164   | 7175418   | 2010001H14R | 0,28337348 | 0,00251308 | 0,0056137  |
| XM_886717   | chr11 | 50096048  | 50096330  | LOC622291   | 0,28304958 | 0,00069261 | 0,00274558 |
| NM_134005   | chr10 | 24463317  | 24525509  | Enpp3       | 0,28302276 | 0,00224019 | 0,00520114 |
| BC082555    | chr10 | 128109220 | 128123073 | Si          | 0,28263003 | 0,00233726 | 0,00534513 |
| NM_019578   | chr4  | 133628448 | 133643855 | Extl1       | 0,28254058 | 0,00013962 | 0,00134116 |
| BC107177    | chr6  | 129011538 | 129022327 | A630024B12R | 0,28220915 | 0,00053773 | 0,00240299 |
| NM_173428   | chr6  | 48377814  | 48430821  | Sspo        | 0,28162422 | 0,00458089 | 0,00835717 |
| NM_178662   | chr10 | 80607641  | 80633908  | Atcay       | 0,28159104 | 0,00044015 | 0,00221264 |
| BC027319    | chr1  | 166273787 | 166294669 | Atp1b1      | 0,28131532 | 0,0011156  | 0,00361599 |
| NM_008452   | chr8  | 75248021  | 75250338  | Klf2        | 0,28094442 | 0,0026266  | 0,00578046 |
| BC005722    | chr17 | 25844230  | 25849946  | Tmem8       | 0,28083315 | 0,00462524 | 0,00842262 |
| BC005645    | chr12 | 39290752  | 39377050  | Etv1        | 0,28037119 | 0,01284034 | 0,0180467  |
| BC011488    | chr7  | 28146253  | 28155301  | Gmfg        | 0,28018274 | 0,00135189 | 0,00395097 |
| NM_177448   | chr7  | 99094275  | 99113794  | Mogat2      | 0,27985666 | 0,00042204 | 0,00215325 |
| NM_00103328 | chr1  | 40626257  | 40713431  | Slc9a2      | 0,27932437 | 0,00575365 | 0,00976812 |
| NM_153508   | chr6  | 124396385 | 124430343 | Clstn3      | 0,27924758 | 0,001161   | 0,00362287 |
| BC052002    | chr7  | 28002314  | 28010522  | Dll3        | 0,27918048 | 0,00060907 | 0,00255186 |
| NM_172133   | chr11 | 79970356  | 79995022  | Centa2      | 0,27888714 | 0,0058707  | 0,00990972 |
| BC066154    | chr15 | 8581958   | 8657625   | Slc1a3      | 0,278786   | 0,00703773 | 0,01128535 |
| BC005679    | chr2  | 164116689 | 164134378 | Sdc4        | 0,27838563 | 4,10E-05   | 0,000887   |
| BC100432    | chr12 | 77122827  | 77165586  | Tcx21       | 0,27835862 | 0,00867067 | 0,01317058 |
| XM_902065   | chr4  | 146518024 | 146546373 | LOC626665   | 0,27815932 | 0,00098831 | 0,00332851 |
| NM_181859   | chr4  | 122618561 | 122620303 | Oxct2b      | 0,2779608  | 0,00402158 | 0,0076841  |
| XM_885194   | chr4  | 60097602  | 60100268  | LOC620807   | 0,27742826 | 0,00063543 | 0,00261872 |

|             |       |           |           |              |            |            |            |
|-------------|-------|-----------|-----------|--------------|------------|------------|------------|
| AY236501    | chr11 | 117598474 | 117608973 | Tmc8         | 0,27694345 | 0,00090685 | 0,00314745 |
| NM_009006   | chr19 | 6341249   | 6353527   | Map4k2       | 0,27624814 | 0,00037885 | 0,00204961 |
| BC006812    | chr17 | 45048781  | 45055905  | Slc29a1      | 0,27503809 | 4,61E-05   | 0,000913   |
| NM_010442   | chr8  | 77989693  | 77989657  | Hmox1        | 0,27466469 | 0,00716158 | 0,01141335 |
| AK013520    | chr2  | 154235846 | 154250292 | Apba2bp      | 0,27367205 | 0,00037205 | 0,00204961 |
| NM_008586   | chr18 | 21215353  | 21243199  | Mep1b        | 0,27216498 | 0,00137162 | 0,00397356 |
| NM_007559   | chr4  | 122607467 | 122628394 | Bmp8b        | 0,27197074 | 0,00018056 | 0,00147255 |
| NM_008905   | chr7  | 107386442 | 107536062 | Ppfibp2      | 0,27187775 | 0,00357747 | 0,00704442 |
| NM_145482   | chr16 | 93472000  | 93492343  | Setd4        | 0,27175968 | 0,00039559 | 0,00207066 |
| BC083183    | chr5  | 118103215 | 118215391 | Nos1         | 0,27128102 | 0,00273075 | 0,00590684 |
| AK013805    | chr15 | 81782808  | 81788088  | Pmm1         | 0,27033434 | 0,00045241 | 0,0022515  |
| XM_976860   | chr7  | 6871316   | 6882625   | LOC665427    | 0,27026252 | 0,00592512 | 0,00996771 |
| NM_011957   | chr2  | 91783491  | 91824970  | Creb3l1      | 0,27010271 | 0,00763967 | 0,01202104 |
| XM_981055   | chr13 | 67150404  | 67238313  | LOC666027    | 0,27003532 | 0,00551772 | 0,00951666 |
| BC003729    | chr8  | 128881516 | 128916773 | Kcnk1        | 0,26966372 | 0,00035997 | 0,00201118 |
| AK033541    | chr13 | 76227984  | 76234040  | Ell2         | 0,26958585 | 0,00104018 | 0,00704368 |
| BC016447    | chr2  | 91783168  | 91824984  | Creb3l1      | 0,26905755 | 0,0062751  | 0,01040139 |
| XM_898358   | chr13 | 76172804  | 76234441  | Ell2         | 0,26881521 | 0,00184321 | 0,00467825 |
| NM_019926   | chrX  | 67475637  | 67575821  | Mtm1         | 0,26829895 | 0,01237616 | 0,01749329 |
| BC056425    | chr4  | 47113041  | 47143969  | Galtnt12     | 0,26775461 | 0,00232622 | 0,00532806 |
| NM_029881   | chr10 | 25680600  | 25768066  | C030003D03R  | 0,26696453 | 0,00417616 | 0,00784504 |
| NM_146052   | chr14 | 14150786  | 14232140  | Lrrc3b       | 0,26673703 | 0,00035736 | 0,00200601 |
| NM_008430   | chr8  | 128881259 | 128916775 | Kcnk1        | 0,26630289 | 0,00101264 | 0,00336247 |
| NM_022880   | chr17 | 45048802  | 45055974  | Slc29a1      | 0,26616695 | 5,20E-05   | 0,00366639 |
| NM_011226   | chr6  | 39311034  | 39319987  | Rab19        | 0,26528408 | 0,0010114  | 0,00336247 |
| NM_011011   | chr1  | 5578573   | 5592947   | Oprk1        | 0,26466023 | 0,01304017 | 0,01826298 |
| NM_026384   | chr7  | 99028854  | 99057905  | Dgat2        | 0,26424963 | 0,00122651 | 0,00373731 |
| NM_172841   | chr1  | 12863808  | 12976349  | Slco5a1      | 0,26413914 | 0,00118313 | 0,00366352 |
| AK083429    | chr8  | 47157108  | 47319958  | Sorbs2       | 0,26396831 | 9,23E-05   | 0,00113276 |
| NM_009814   | chr3  | 102205025 | 102275310 | Casq2        | 0,26260446 | 0,00218063 | 0,00511243 |
| AK146265    | chr17 | 45048783  | 45059483  | Slc29a1      | 0,2625899  | 2,01E-05   | 0,0006852  |
| BC050102    | chr12 | 85492407  | 85507161  | Abcd4        | 0,26143061 | 0,0002627  | 0,0017471  |
| NM_026728   | chr4  | 107663427 | 107677239 | Echdc2       | 0,26133882 | 0,00011887 | 0,00126783 |
| XM_895723   | chr7  | 18315646  | 18318711  | Gipr         | 0,26126335 | 0,00491753 | 0,00880694 |
| XM_919630   | chr8  | 47126257  | 47274942  | Sorbs2       | 0,26122593 | 0,00650945 | 0,01067657 |
| AK144111    | chr11 | 115809077 | 115824404 | Itgba        | 0,26084536 | 0,00681434 | 0,01102201 |
| AK015486    | chr7  | 3727575   | 3737326   | Ttyh1        | 0,26071883 | 0,00016848 | 0,00143675 |
| NM_00100145 | chr6  | 42329844  | 42330726  | Tas2r143     | 0,26064053 | 0,00536214 | 0,00933927 |
| XM_891129   | chr8  | 13435435  | 13461430  | Gm687        | 0,26049965 | 0,00142649 | 0,00405568 |
| BC036127    | chr1  | 174111204 | 174134650 | Atpla2       | 0,26034802 | 0,01059571 | 0,01545295 |
| XM_980493   | chr13 | 66285769  | 66316931  | LOC665954    | 0,25976759 | 0,00254503 | 0,00566385 |
| BC099390    | chr2  | 104633280 | 104650606 | Prrg4        | 0,25952223 | 0,00259085 | 0,00572948 |
| BC050881    | chr16 | 17054598  | 17057772  | 4930432J16Ri | 0,25942211 | 0,00227215 | 0,00525468 |
| BC027770    | chr3  | 116858190 | 116895482 | Frrs1        | 0,25887484 | 0,00256262 | 0,00568603 |
| BC011093    | chr18 | 67414628  | 67444209  | Impa2        | 0,25872236 | 0,0015802  | 0,00428625 |
| BC021425    | chr14 | 67982608  | 67993272  | Stc1         | 0,25819626 | 0,00481679 | 0,00867081 |
| NM_009146   | chr3  | 116853695 | 116895645 | Frrs1        | 0,2580573  | 0,00547735 | 0,00947098 |
| AK144913    | chr4  | 127979457 | 128003481 | Csm2         | 0,25797443 | 0,00038142 | 0,00205423 |
| NM_008691   | chr14 | 67073366  | 67078143  | Nef3         | 0,25717697 | 0,00010215 | 0,00118484 |
| BC025646    | chr9  | 69889620  | 69940708  | 6430514L14Ri | 0,25708488 | 0,00143348 | 0,00405733 |
| NM_080639   | chr6  | 115211437 | 115217467 | Timp4        | 0,25689309 | 0,00451243 | 0,0082628  |
| BC071238    | chr7  | 7960019   | 7967977   | 2810047C21R  | 0,25628246 | 0,00240976 | 0,00545416 |
| NM_053261   | chr18 | 67414591  | 67444210  | Impa2        | 0,25556934 | 0,00133888 | 0,00393027 |
| BC039163    | chr8  | 47157620  | 47326721  | Sorbs2       | 0,25523947 | 0,00352836 | 0,00697525 |
| NM_183188   | chr16 | 6985155   | 7325290   | A2bp1        | 0,25371898 | 2,97E-05   | 0,00083399 |
| BC019483    | chr3  | 157829716 | 157860342 | Cth          | 0,25345825 | 0,00083937 | 0,00300566 |
| NM_007558   | chr4  | 122814947 | 122845106 | Bmp8a        | 0,25245066 | 0,01298154 | 0,01819475 |
| NM_013458   | chr6  | 86043717  | 86085189  | Add2         | 0,25230429 | 0,00157346 | 0,00427769 |
| AK169562    | chr11 | 88815492  | 88834190  | Trim25       | 0,25223785 | 0,0066572  | 0,01086213 |
| AK169530    | chr3  | 131101960 | 131177237 | N/A          | 0,2521755  | 0,0070535  | 0,01129545 |
| AK140498    | chr8  | 47157492  | 47326720  | Sorbs2       | 0,25150808 | 0,00149389 | 0,00415224 |
| BC010806    | chr7  | 140942494 | 140946227 | Sigirr       | 0,25143371 | 0,0036031  | 0,00707565 |
| AK150105    | chr14 | 65107953  | 65235092  | Ptk2b        | 0,25112252 | 0,00235529 | 0,00537263 |
| XM_486103   | chr8  | 47160809  | 47326723  | Sorbs2       | 0,25099201 | 0,00292577 | 0,00618123 |
| XM_980049   | chr13 | 66016410  | 66018856  | LOC665876    | 0,25099027 | 0,00057074 | 0,00247113 |
| NM_010599   | chr11 | 69142452  | 69149236  | Kcnab3       | 0,25096881 | 2,05E-07   | 0,00029564 |
| NM_016707   | chr11 | 23978116  | 24073194  | Bcl11a       | 0,25096533 | 0,00183005 | 0,00466306 |
| XM_284542   | chr9  | 111156554 | 111221919 | LOC620538    | 0,25091373 | 3,64E-05   | 0,00085724 |
| NM_177216   | chr7  | 107539631 | 107549173 | Cyb5r2       | 0,25066573 | 0,00035493 | 0,00199684 |
| NM_007679   | chr16 | 15800863  | 15803123  | Cebpd        | 0,2505233  | 0,00228539 | 0,00526891 |
| NM_010351   | chr12 | 104872258 | 104874286 | Gsc          | 0,25036995 | 0,00435788 | 0,0080839  |
| XM_979220   | chr13 | 65393966  | 65429537  | LOC665753    | 0,2498337  | 0,00070301 | 0,00277023 |
| NM_026249   | chr3  | 32557323  | 32558985  | 4930429B21R  | 0,24959541 | 0,00123292 | 0,00374691 |
| AK036277    | chr2  | 156625743 | 156683476 | Ndrp3        | 0,24953891 | 0,00095019 | 0,00324829 |
| BC029741    | chr10 | 79733286  | 79739567  | Reep6        | 0,24941382 | 3,86E-05   | 0,000881   |
| BC024765    | chr11 | 6558539   | 6577482   | Ramp3        | 0,24936773 | 0,00120916 | 0,00370835 |

|             |       |           |           |              |            |            |            |
|-------------|-------|-----------|-----------|--------------|------------|------------|------------|
| BC096053    | chr6  | 42193341  | 42194153  | Tmem139      | 0,24910686 | 0,00603104 | 0,01010881 |
| XM_897318   | chr16 | 10106289  | 10127809  | Atf7ip2      | 0,24886639 | 0,00201098 | 0,00492178 |
| NM_194050   | chr2  | 130375548 | 130388960 | Slc4a11      | 0,24782838 | 0,00037486 | 0,00204961 |
| BC052877    | chr10 | 39726387  | 39831140  | Slc16a10     | 0,24728672 | 0,00013524 | 0,0013321  |
| AK140848    | chr4  | 11260207  | 11313930  | Rbm35a       | 0,24697039 | 0,00081284 | 0,00297494 |
| XM_902971   | chr2  | 166734953 | 166753921 | AI481105     | 0,24691334 | 0,00269486 | 0,00586647 |
| NM_139292   | chr10 | 79733298  | 79739570  | Reep6        | 0,24676619 | 4,16E-05   | 0,000887   |
| BC075616    | chr5  | 34313759  | 34319912  | 1110038O08R  | 0,24586359 | 0,00025346 | 0,00171135 |
| BC046525    | chr11 | 120764573 | 120774860 | Slc16a3      | 0,24567904 | 0,00022545 | 0,0016254  |
| XM_983716   | chr13 | 65654196  | 65665446  | LOC665764    | 0,24560185 | 0,00074147 | 0,0028247  |
| NM_0010339C | chr1  | 21353481  | 21354894  | BC099381     | 0,24510243 | 0,00083588 | 0,00300566 |
| BC030038    | chr3  | 108341185 | 108354638 | Sypl2        | 0,24482566 | 0,00410641 | 0,00778703 |
| AK080955    | chr10 | 126727271 | 126732892 | Arhgap9      | 0,24482453 | 0,00012746 | 0,00131698 |
| NM_178692   | chr1  | 186572713 | 186583802 | C130074G19R  | 0,24481944 | 4,17E-05   | 0,000887   |
| NM_0010332E | chr1  | 187155635 | 187169550 | Slc30a10     | 0,24439782 | 0,00243839 | 0,00549836 |
| NM_008808   | chr5  | 139230612 | 139248595 | Pdgfra       | 0,24435209 | 0,00070975 | 0,00278205 |
| NM_181064   | chr6  | 129011519 | 129022800 | A630024B12R  | 0,24422001 | 0,00130988 | 0,00387184 |
| NM_145953   | chr3  | 157829540 | 157860356 | Cth          | 0,24413482 | 0,0015399  | 0,00421528 |
| NM_024469   | chr6  | 145819895 | 145822499 | Bhlhb3       | 0,24364626 | 0,00221325 | 0,00516657 |
| NM_177909   | chr9  | 94479269  | 95039729  | Slc9a9       | 0,24351738 | 0,00210623 | 0,00501057 |
| BC052394    | chr6  | 122283370 | 122304483 | Phc1         | 0,2433509  | 1,71E-05   | 0,00063799 |
| NM_133904   | chr5  | 114426516 | 114510733 | Acacb        | 0,24306881 | 0,00631039 | 0,01043348 |
| BC023101    | chr6  | 72478992  | 72492485  | Cag3         | 0,24286447 | 0,00813053 | 0,01258417 |
| NM_172847   | chr1  | 34622733  | 34668847  | C230030N03R  | 0,24275563 | 0,0017289  | 0,00450314 |
| NM_183368   | chr17 | 6555487   | 6587494   | Sytl3        | 0,24262947 | 0,00199676 | 0,00490922 |
| NM_007905   | chr6  | 122283349 | 122302616 | Phc1         | 0,24232973 | 1,09E-06   | 0,00035401 |
| NM_181856   | chr11 | 117599139 | 117609118 | Tmc8         | 0,24190961 | 0,00056143 | 0,00244618 |
| NM_028954   | chr7  | 18647577  | 18655282  | 4933417E01R  | 0,24175316 | 0,00047861 | 0,00230991 |
| AK079130    | chr8  | 47157486  | 47275699  | Sorbs2       | 0,24055522 | 0,00375463 | 0,007313   |
| BC064715    | chr16 | 56731224  | 56811117  | Tmem45a      | 0,24018368 | 0,00263915 | 0,00579971 |
| XM_898369   | chr13 | 76172804  | 76238363  | Ell2         | 0,23995016 | 9,15E-05   | 0,00112971 |
| AK041785    | chr4  | 116986234 | 116994984 | 4931406I20Ri | 0,23960225 | 0,00807894 | 0,01252383 |
| XM_619828   | chr2  | 151770418 | 151787243 | Scrt2        | 0,23953306 | 0,00102429 | 0,00337061 |
| BC029101    | chr16 | 93471997  | 93492267  | Setd4        | 0,23945725 | 0,00038825 | 0,00206033 |
| XM_898400   | chr4  | 84985250  | 85254362  | A930009N24   | 0,2388257  | 0,00864309 | 0,01313538 |
| NM_0010074E | chr16 | 43888477  | 43898382  | Zdhc23       | 0,23828004 | 0,00115998 | 0,00362272 |
| AK046642    | chr19 | 23207207  | 23209483  | N/A          | 0,23810668 | 0,0000155  | 0,00139921 |
| NM_0010041E | chr7  | 80988311  | 81043929  | Slc28a1      | 0,23803077 | 0,00129668 | 0,00385001 |
| XM_980935   | chr13 | 66873752  | 66884726  | LOC628709    | 0,23771146 | 0,00143328 | 0,00405733 |
| NM_0010391E | chr7  | 28149696  | 28155655  | Gmfg         | 0,23767356 | 0,0005094  | 0,00234809 |
| NM_0010375D | chr6  | 99676761  | 99691855  | Prok2        | 0,23690655 | 0,00822793 | 0,01266587 |
| NM_007631   | chr7  | 144739320 | 144749220 | Ccnd1        | 0,23631667 | 0,00171995 | 0,00449618 |
| NM_022033   | chr4  | 122824177 | 122825919 | Oxct2a       | 0,23540225 | 0,00142996 | 0,00405723 |
| AK006869    | chr6  | 122356997 | 122358306 | 1700063H04R  | 0,23529513 | 0,00141708 | 0,00404595 |
| NM_0010180C | chr16 | 48203356  | 48213914  | Dppa4        | 0,23474994 | 5,00E-05   | 0,00095198 |
| NM_207028   | chr6  | 42364141  | 42365068  | Tas2r126     | 0,23451628 | 0,00227425 | 0,00525749 |
| NM_207233   | chr1  | 122168127 | 122170720 | C1ql2        | 0,23449515 | 0,00587785 | 0,00991336 |
| XM_902970   | chr2  | 166740773 | 166753887 | AI481105     | 0,23398858 | 2,01E-05   | 0,0006852  |
| AY212017    | chr11 | 69396599  | 69407992  | Trp53        | 0,23396695 | 0,01030872 | 0,01513062 |
| NM_015801   | chr8  | 3515383   | 3544267   | Nte          | 0,23355539 | 0,000187   | 0,00149633 |
| BC006908    | chr11 | 88815523  | 88833428  | Trim25       | 0,23289744 | 0,00508876 | 0,00901342 |
| NM_023059   | chr7  | 140942495 | 140946222 | Sigirr       | 0,23256727 | 0,0042388  | 0,00791969 |
| BC046535    | chr6  | 122283356 | 122305257 | Phc1         | 0,23255223 | 8,06E-06   | 0,0005488  |
| XM_902090   | chr12 | 112554490 | 112561923 | A530050D06R  | 0,23224294 | 0,00273749 | 0,00590909 |
| XM_355865   | chr7  | 18320811  | 18324649  | Gipr         | 0,23214638 | 0,00222296 | 0,0051794  |
| BC052931    | chr1  | 87548860  | 87567736  | A630001G21R  | 0,23210079 | 0,00013269 | 0,00133181 |
| NM_0010386E | chr11 | 120765156 | 120775090 | Slc16a3      | 0,23155605 | 6,52E-05   | 0,00102744 |
| XM_899196   | chr17 | 25935441  | 25938924  | Rgs11        | 0,23116368 | 3,42E-05   | 0,00083399 |
| NM_175460   | chr1  | 154717318 | 154881479 | Nmnat2       | 0,23038574 | 0,00871737 | 0,01320787 |
| BC055291    | chr3  | 14863449  | 14877513  | Car2         | 0,2303123  | 0,00303569 | 0,0063172  |
| XM_128488   | chr17 | 25930561  | 25938924  | Rgs11        | 0,23015537 | 0,00024675 | 0,00169777 |
| BC066106    | chr1  | 134340577 | 134370406 | Cntn2        | 0,22986414 | 0,00291091 | 0,00615858 |
| BC086768    | chr4  | 45820162  | 45825701  | Aldh1b1      | 0,22981847 | 0,00137693 | 0,00397927 |
| AK076803    | chr13 | 6580427   | 6647971   | Pfkp         | 0,22969956 | 0,00072182 | 0,00278211 |
| BC114427    | chr11 | 4120064   | 4120861   | N/A          | 0,22955631 | 0,00172256 | 0,00449647 |
| NM_020578   | chr17 | 73709753  | 73736970  | Ehd3         | 0,22909481 | 0,00027273 | 0,00176743 |
| XM_892523   | chr7  | 5855796   | 5884948   | Av381130     | 0,22863529 | 0,00057727 | 0,00248932 |
| AK036154    | chr1  | 132980758 | 133015204 | Lgtn         | 0,22814454 | 3,55E-05   | 0,00084227 |
| NM_008170   | chr16 | 9491264   | 9906111   | Grin2a       | 0,2280834  | 0,00197257 | 0,00487783 |
| NM_011577   | chr7  | 25395761  | 25413756  | Tgfb1        | 0,22776953 | 0,00173076 | 0,00450339 |
| NM_011244   | chr15 | 102062973 | 102085313 | Rarg         | 0,22770428 | 0,00197894 | 0,00488145 |
| NM_029758   | chr12 | 12302328  | 12402349  | D12Erttd553e | 0,2268017  | 0,00285125 | 0,00606462 |
| NM_177790   | chr11 | 100443635 | 100466783 | A930006D11R  | 0,22584006 | 0,00031003 | 0,00186879 |
| AK167590    | chr6  | 122283918 | 122305264 | Phc1         | 0,22537926 | 4,28E-05   | 0,00089285 |
| AF169037    | chr11 | 23978116  | 24073193  | Bcl11a       | 0,22522101 | 0,0001572  | 0,00140113 |
| XM_899237   | chr17 | 25930575  | 25938925  | Rgs11        | 0,22521217 | 0,00034468 | 0,00196835 |

|             |       |           |           |             |            |            |            |
|-------------|-------|-----------|-----------|-------------|------------|------------|------------|
| BC025454    | chr4  | 107670869 | 107677239 | Echdc2      | 0,22474849 | 0,00080173 | 0,0029513  |
| NM_013462   | chr8  | 28691711  | 28695524  | Adrb3       | 0,22429717 | 0,00242068 | 0,0054682  |
| XM_974939   | chr12 | 52749804  | 52754077  | LOC544864   | 0,224047   | 0,00242224 | 0,0054682  |
| BC012923    | chr15 | 102063474 | 102085482 | Rarg        | 0,22380539 | 0,00144346 | 0,00407091 |
| BC019741    | chr17 | 25935053  | 25938917  | Rgs11       | 0,22338848 | 0,0009795  | 0,00331618 |
| NM_029620   | chr9  | 95446979  | 95504903  | Pcolce2     | 0,22249169 | 0,00161614 | 0,00434735 |
| BC079630    | chr4  | 68247876  | 68440725  | Dbccr1      | 0,22223788 | 0,01121564 | 0,01617504 |
| AK033320    | chrX  | 67475586  | 67559417  | N/A         | 0,22172807 | 0,00382774 | 0,00741416 |
| NM_008965   | chr15 | 5181079   | 5191046   | Ptger4      | 0,22134878 | 0,00024325 | 0,00169087 |
| NM_026652   | chr4  | 52617373  | 52633263  | 4930547C10R | 0,2212864  | 5,94E-05   | 0,00101981 |
| AB041544    | chr5  | 45840811  | 45927673  | N/A         | 0,22060438 | 8,88E-05   | 0,00112072 |
| XM_979107   | chr13 | 65350437  | 65363388  | LOC665738   | 0,22034051 | 0,00100423 | 0,00336064 |
| NM_029267   | chr1  | 55290801  | 55308014  | Boll        | 0,2197929  | 0,00183895 | 0,00467466 |
| NM_011270   | chr4  | 134136659 | 134168248 | Rhd         | 0,21927501 | 4,70E-05   | 0,00092533 |
| BC044841    | chr7  | 144740747 | 144749218 | Ccnd1       | 0,21824694 | 0,00291951 | 0,00617018 |
| NM_011521   | chr2  | 164115451 | 164134393 | Sdcd        | 0,21750342 | 1,35E-05   | 0,00060233 |
| NM_172285   | chr8  | 120384267 | 120521119 | Plcg2       | 0,21746121 | 0,00093711 | 0,00321835 |
| XM_485383   | chr4  | 57284894  | 57394944  | Ptpn3       | 0,21717651 | 0,00046104 | 0,00226977 |
| NM_026496   | chr15 | 37177835  | 37308152  | Grhl2       | 0,21697238 | 0,00812881 | 0,01258417 |
| NM_009801   | chr3  | 14863468  | 14877513  | Car2        | 0,21693178 | 0,00155496 | 0,00424212 |
| NM_144811   | chr15 | 79740243  | 79759866  | Cbx7        | 0,21685411 | 1,21E-06   | 0,00035401 |
| NM_009368   | chr12 | 86945846  | 86967637  | Tgfb3       | 0,21671336 | 0,00011091 | 0,00122629 |
| NM_026239   | chrX  | 129641574 | 129652319 | Tmem35      | 0,21664928 | 0,00415794 | 0,007825   |
| NM_177735   | chr5  | 144989441 | 145015105 | Tmem130     | 0,21654318 | 0,00297852 | 0,00624839 |
| BC013709    | chr15 | 102062979 | 102080685 | Rarg        | 0,21564248 | 0,00433011 | 0,00804934 |
| NM_028060   | chr9  | 53569674  | 53616293  | Slc35f2     | 0,21558619 | 0,0003665  | 0,00203261 |
| NM_053079   | chr14 | 120594798 | 120640433 | Slc15a1     | 0,21533181 | 0,01355483 | 0,01885532 |
| XM_979429   | chr13 | 65518350  | 65530075  | LOC665784   | 0,21452485 | 0,00050436 | 0,00234312 |
| BC094346    | chr2  | 32397726  | 32405783  | Pip5k1l     | 0,21445051 | 0,00115105 | 0,00360919 |
| BC050880    | chrX  | 129641672 | 129652317 | Tmem35      | 0,21442029 | 0,005065   | 0,00898201 |
| NM_00103318 | chr1  | 171765613 | 171771328 | 1700084C01R | 0,21391803 | 0,00036944 | 0,0020421  |
| BC094218    | chr18 | 81131279  | 81133995  | Sall3       | 0,2134278  | 0,00185462 | 0,00469123 |
| NM_028610   | chr16 | 48203356  | 48213914  | Dppa4       | 0,21317941 | 0,00124046 | 0,00374691 |
| XM_198094   | chr8  | 13435435  | 13461424  | Gm687       | 0,21279311 | 0,00038656 | 0,00206033 |
| NM_031395   | chr17 | 6523268   | 6587494   | Sytl3       | 0,21239966 | 0,00313455 | 0,00643976 |
| NM_00103904 | chr7  | 43580608  | 43594800  | Klk13       | 0,21219658 | 0,0035156  | 0,00695884 |
| AK019807    | chr7  | 4386034   | 4387423   | 4930572D21R | 0,21192416 | 0,0017184  | 0,00449545 |
| NM_00102983 | chr4  | 148492967 | 148524913 | Pik3cd      | 0,21153721 | 0,0001223  | 0,00128279 |
| NM_032002   | chr9  | 55019437  | 55081640  | Nrg4        | 0,21139698 | 0,00111851 | 0,00354145 |
| NM_008529   | chr15 | 74782910  | 74786586  | Ly6e        | 0,2113042  | 0,00026385 | 0,00174734 |
| AK041324    | chr1  | 87548862  | 87567747  | A630001G21R | 0,21128321 | 0,00012984 | 0,00131796 |
| BC003277    | chr4  | 141303068 | 141349166 | Tmem51      | 0,2111651  | 0,00116692 | 0,00363298 |
| NM_026301   | chr18 | 21087634  | 21126858  | Rnf125      | 0,21111973 | 0,00050484 | 0,00234312 |
| NM_019967   | chr4  | 68247732  | 68440758  | Dbccr1      | 0,21062131 | 0,00337942 | 0,00676564 |
| XM_899216   | chr17 | 25930561  | 25938924  | Rgs11       | 0,21042675 | 0,00029062 | 0,00182576 |
| AK160898    | chr11 | 88815541  | 88833441  | Trim25      | 0,21013378 | 0,00734982 | 0,01165667 |
| AK032470    | chr6  | 79951162  | 80739640  | Lrrtm4      | 0,21011387 | 0,0086352  | 0,01312673 |
| NM_025290   | chr17 | 30983728  | 31006066  | Tsga2       | 0,20985431 | 0,00441885 | 0,00816652 |
| BC072631    | chr18 | 81131279  | 81148581  | Sall3       | 0,20932357 | 0,00153717 | 0,00421167 |
| BC037216    | chr6  | 79948463  | 80739640  | Lrrtm4      | 0,20915533 | 0,00379573 | 0,0073762  |
| NM_172731   | chr6  | 91952613  | 92041509  | Fgd5        | 0,20912054 | 0,00644083 | 0,01059609 |
| BC100738    | chr7  | 126927217 | 126928484 | Spn         | 0,2080992  | 0,0027043  | 0,00587575 |
| NM_177005   | chr5  | 127921464 | 127981105 | Glt1d1      | 0,20731456 | 0,001529   | 0,00420209 |
| NM_00103346 | chr6  | 127543593 | 127595557 | Efcab4b     | 0,20680792 | 3,85E-05   | 0,000881   |
| BC021450    | chr2  | 62465182  | 62494336  | Gca         | 0,20599721 | 0,00398417 | 0,00764519 |
| XM_487967   | chr6  | 128979752 | 128986138 | Clec2f      | 0,2048363  | 0,00108356 | 0,00347231 |
| BC101963    | chr6  | 122571893 | 122575605 | Gdf3        | 0,20468539 | 0,00949902 | 0,01415543 |
| AK140949    | chr11 | 23978110  | 24067330  | Bcl11a      | 0,20342046 | 0,00298908 | 0,00625953 |
| NM_008712   | chr5  | 118128148 | 118214843 | Nos1        | 0,20275743 | 0,00882449 | 0,01332951 |
| AY547265    | chr2  | 36052564  | 36060072  | Ptgs1       | 0,20275509 | 0,00038248 | 0,00205599 |
| AK002633    | chr15 | 37177624  | 37278236  | Grhl2       | 0,20223435 | 0,00083643 | 0,00300566 |
| BC064754    | chr16 | 48203417  | 48213859  | Dppa4       | 0,20201393 | 5,49E-05   | 0,00098615 |
| NM_028270   | chr4  | 45820148  | 45825699  | Aldh1b1     | 0,20185016 | 0,00124458 | 0,00375292 |
| NM_018810   | chr6  | 39327426  | 39349993  | Mkrm1       | 0,20182965 | 7,60E-05   | 0,00108714 |
| XM_980162   | chr13 | 66060728  | 66076578  | LOC665897   | 0,20168141 | 0,00564176 | 0,00966557 |
| AK156164    | chr13 | 76173520  | 76238358  | Ell2        | 0,20139736 | 8,43E-06   | 0,00054898 |
| NM_012054   | chr13 | 20801583  | 21031717  | Aoah        | 0,20101104 | 5,33E-05   | 0,00097866 |
| AK078962    | chr6  | 39335147  | 39349905  | Mkrm1       | 0,20090936 | 0,00022546 | 0,0016254  |
| XM_907433   | chr5  | 22816365  | 22842392  | LOC633089   | 0,19920328 | 0,00011536 | 0,00124827 |
| NM_011897   | chr14 | 104778113 | 104782418 | Spry2       | 0,19913794 | 0,002322   | 0,00532657 |
| BC014690    | chr12 | 86945903  | 86967423  | Tgfb3       | 0,19882945 | 0,00018252 | 0,00147652 |
| XM_973679   | chr7  | 4386034   | 4387428   | 4930572D21R | 0,19845218 | 0,0010333  | 0,00338863 |
| AK133041    | chr1  | 134556898 | 134560372 | N/A         | 0,19783734 | 0,00047508 | 0,00229718 |
| BC099868    | chr4  | 19935575  | 19955778  | Ttpa        | 0,1973721  | 0,00697982 | 0,01121058 |
| NM_145402   | chr4  | 141303068 | 141356380 | Tmem51      | 0,19641495 | 0,00066595 | 0,0026795  |
| BC021398    | chr15 | 79744538  | 79759882  | Cbx7        | 0,19614467 | 0,00037525 | 0,00204961 |

|             |               |           |           |              |            |            |            |
|-------------|---------------|-----------|-----------|--------------|------------|------------|------------|
| BC011513    | chr10         | 20815300  | 20850296  | Myb          | 0,19596211 | 0,00604993 | 0,01012624 |
| XM_129603   | chr1          | 158091971 | 158140386 | Tdrd5        | 0,19562102 | 9,86E-06   | 0,00055975 |
| NM_00100292 | chr4          | 4060682   | 4065592   | Penk1        | 0,19551755 | 0,0081417  | 0,01258838 |
| NM_198603   | chr6          | 115776347 | 115804031 | BC060267     | 0,19533287 | 0,00165514 | 0,00440729 |
| NM_178280   | chr18         | 81128417  | 81148637  | Sall3        | 0,19457344 | 0,00025652 | 0,00172533 |
| BC006944    | chr10         | 24506542  | 24525552  | Enpp3        | 0,19448265 | 0,00011192 | 0,00123072 |
| NM_144518   | chr16         | 13900238  | 14014865  | 2900011O08R  | 0,19438876 | 0,00056298 | 0,00244958 |
| XM_884678   | chr7          | 18315646  | 18324649  | Gipr         | 0,19371264 | 0,00307647 | 0,0063621  |
| NM_013751   | chr16         | 29129441  | 29150277  | Hrasls       | 0,19356142 | 0,00037064 | 0,00204552 |
| NM_010118   | chr10         | 66933234  | 66937545  | Egr2         | 0,1924706  | 0,002285   | 0,00526891 |
| M55181      | chr4          | 4060683   | 4065586   | Penk1        | 0,19148191 | 0,00298823 | 0,00625953 |
| BC113753    | chr5          | 104442996 | 104453662 | Dmp1         | 0,19137974 | 0,00043339 | 0,00219531 |
| XM_981856   | chr14         | 40290340  | 40305244  | LOC666138    | 0,1912299  | 0,01105696 | 0,01598487 |
| NM_010487   | chr9          | 21768177  | 21802412  | Elavl3       | 0,1901509  | 0,00044429 | 0,00222592 |
| NM_021564   | chr16         | 22835634  | 22855086  | Fetub        | 0,18982212 | 0,00504219 | 0,00894954 |
| NM_024446   | chr8          | 117019594 | 117038269 | Nudt7        | 0,18942912 | 2,61E-05   | 0,00749427 |
| AK049108    | chr4          | 82711048  | 82795470  | 1810054D07R  | 0,18924669 | 0,00222812 | 0,00518298 |
| U65593      | chr11         | 69146518  | 69148338  | Kcnab3       | 0,18908454 | 0,00016715 | 0,0014314  |
| BC048553    | chr7          | 122424736 | 122425548 | N/A          | 0,1887576  | 0,00265638 | 0,00582684 |
| AK084264    | chr1          | 186574524 | 186583795 | C130074G19R  | 0,18873842 | 0,00038625 | 0,00219533 |
| NM_133197   | chrX          | 56402742  | 56494427  | Mcf2         | 0,18848305 | 0,00144601 | 0,00407618 |
| NM_016960   | chr1          | 82995805  | 82998190  | Ccl20        | 0,18784917 | 0,00021982 | 0,00161398 |
| AK043424    | chr4          | 84676699  | 85110426  | Sh3gl2       | 0,18752177 | 0,00017534 | 0,00145795 |
| BC006613    | chr7          | 100871111 | 100886072 | P2ry2        | 0,18701553 | 0,00017286 | 0,00145326 |
| AK035743    | chr6          | 42279664  | 42289753  | N/A          | 0,18673143 | 0,00054833 | 0,00241621 |
| XM_983979   | chr13         | 66804220  | 66818662  | LOC665874    | 0,1847889  | 0,00445499 | 0,00820133 |
| BC049664    | chr12         | 12288162  | 12398982  | D12Erttd553e | 0,18437565 | 6,04E-06   | 0,00053609 |
| NM_009521   | chr11         | 103590313 | 103634047 | Wnt3         | 0,18433774 | 0,00479425 | 0,00863806 |
| BC006925    | chr13         | 76227939  | 76238220  | Ell2         | 0,18416447 | 0,00013662 | 0,00133239 |
| NM_021273   | chr12         | 112117168 | 112120076 | Ckb          | 0,18413852 | 0,00821497 | 0,01265573 |
| XM_00100265 | chr7          | 42950733  | 42965173  | LOC668620    | 0,18384731 | 7,23E-06   | 0,00053713 |
| NM_007504   | chr7          | 126237007 | 126254221 | Atp2a1       | 0,18370167 | 0,00241055 | 0,00545416 |
| XM_484701   | chr18         | 9916883   | 9918151   | LOC433161    | 0,1830695  | 2,93E-05   | 0,00083399 |
| BC029680    | chr19         | 8904852   | 8906175   | Gng3         | 0,18304412 | 0,00182098 | 0,00464755 |
| XM_975397   | chr2          | 26065460  | 26092488  | C030048H21R  | 0,1827821  | 0,00123795 | 0,00374691 |
| NM_176964   | chr12         | 108418263 | 108419432 | A130014H13R  | 0,18277069 | 0,001697   | 0,00446925 |
| NM_008108   | chr6          | 122571021 | 122575690 | Gdf3         | 0,18273143 | 0,00302666 | 0,00630722 |
| BC051474    | chr19         | 6401701   | 6403636   | Rasgrp2      | 0,18264827 | 0,00037782 | 0,00204961 |
| BC056988    | chrX          | 70106692  | 70133479  | L1cam        | 0,1826335  | 0,00271034 | 0,00588458 |
| NM_145621   | chr9          | 107794020 | 107807792 | Camkv        | 0,18261198 | 4,30E-05   | 0,00089339 |
| NM_00103489 | chr7          | 43045518  | 43060028  | LOC435970    | 0,18187847 | 4,11E-05   | 0,000887   |
| AK021218    | chr13         | 66626864  | 66633858  | C330022B21R  | 0,18181587 | 0,00049381 | 0,00233471 |
| NM_177260   | chr3          | 84752118  | 84790502  | 9930117H01R  | 0,18155938 | 0,00061445 | 0,00256359 |
| XM_973716   | chr7          | 4387795   | 4392647   | LOC664968    | 0,18102615 | 0,00064832 | 0,0026518  |
| XM_138107   | chr12         | 88168784  | 88184175  | Thsd3        | 0,18071356 | 0,00354957 | 0,00700746 |
| XM_984014   | chr13         | 66804220  | 66811218  | LOC665874    | 0,18063216 | 0,00149575 | 0,0041547  |
| NM_178877   | chr3          | 135245133 | 135279921 | C80638       | 0,18039526 | 8,73E-05   | 0,00112072 |
| BC005573    | chr2          | 36052517  | 36074278  | Ptgs1        | 0,18036275 | 6,91E-05   | 0,00105111 |
| NM_007515   | chrX          | 97281939  | 97288071  | Slc7a3       | 0,17997811 | 0,00499866 | 0,00889877 |
| AK122557    | chr11         | 23978146  | 23990906  | Bcl11a       | 0,17941221 | 0,00334515 | 0,00672866 |
| XM_980754   | chr8          | 74681050  | 74689583  | LOC665991    | 0,1786284  | 0,00137082 | 0,00397356 |
| BC003480    | chr6          | 72478980  | 72492484  | Capg         | 0,17827628 | 0,00106838 | 0,00345204 |
| AK045424    | chrX          | 56402748  | 56525873  | Mcf2         | 0,17785252 | 0,0006477  | 0,0026518  |
| XM_983868   | chr13         | 66054491  | 66060597  | LOC665833    | 0,17760696 | 0,0005401  | 0,00240481 |
| NM_146855   | chr9          | 39877594  | 39878530  | Olfir985     | 0,17704852 | 0,00016088 | 0,00142469 |
| NM_008855   | chr7          | 122080444 | 122419795 | Prkcb1       | 0,17698308 | 1,11E-05   | 0,00056681 |
| BC019141    | chr7          | 143310939 | 143311893 | Phlda2       | 0,17697286 | 0,00294428 | 0,00620714 |
| NM_009434   | chr7          | 143310937 | 143311914 | Phlda2       | 0,17686372 | 0,00101423 | 0,00336309 |
| NM_029662   | chr4          | 122449152 | 122463473 | Mfsd2        | 0,17654649 | 0,00514148 | 0,00907586 |
| BC028504    | chr1          | 82995816  | 82998190  | Ccl20        | 0,17653751 | 0,00083203 | 0,00299733 |
| NM_177363   | chrUn_randorr | 157468    | 170945    | 9930022N03R  | 0,17546761 | 0,00070501 | 0,00277141 |
| NM_026183   | chr11         | 61159594  | 61194259  | 1300013J15Ri | 0,17542951 | 0,00029058 | 0,00182576 |
| XM_983824   | chr13         | 66047479  | 66060597  | LOC665833    | 0,17507278 | 0,00214882 | 0,00505375 |
| NM_198095   | chr8          | 74463247  | 74466427  | Bst2         | 0,17499634 | 0,00019163 | 0,00150329 |
| BC011148    | chr4          | 126857502 | 126858678 | Gjb5         | 0,1743776  | 0,00032929 | 0,00193339 |
| AK016103    | chr18         | 21104481  | 21126732  | Rnf125       | 0,17399768 | 0,00199533 | 0,00490922 |
| NM_008969   | chr2          | 36052535  | 36074271  | Ptgs1        | 0,17376627 | 0,00086405 | 0,00305906 |
| NM_007814   | chr7          | 26465946  | 26481390  | Cyp2b19      | 0,17356605 | 4,39E-05   | 0,00089714 |
| NM_021332   | chr17         | 30628888  | 30663545  | Gpl1r        | 0,17344218 | 0,00324738 | 0,00660715 |
| NM_008620   | chr5          | 105357875 | 105379846 | Mpa2         | 0,1730395  | 0,00029521 | 0,00183847 |
| NM_008478   | chrX          | 70107754  | 70122524  | L1cam        | 0,17256718 | 0,00091124 | 0,0031531  |
| BC046596    | chr17         | 73709978  | 73736975  | Ehd3         | 0,17188196 | 0,00020985 | 0,00157179 |
| AK147264    | chr1          | 21383558  | 21947093  | Kcnq5        | 0,17153918 | 0,00163011 | 0,004366   |
| BC066874    | chr7          | 42950756  | 42964994  | LOC435970    | 0,17103538 | 1,72E-05   | 0,00063799 |
| NM_00103342 | chr17         | 23328477  | 23338634  | Zfp206       | 0,17061582 | 0,00029205 | 0,00182981 |
| NM_181664   | chr17         | 45892130  | 45894960  | Crip3        | 0,17055197 | 0,00413685 | 0,00780256 |

|             |       |           |           |             |            |            |             |
|-------------|-------|-----------|-----------|-------------|------------|------------|-------------|
| AF221095    | chr3  | 123520830 | 123664497 | Ndst3       | 0,17044403 | 0,00041204 | 0,00212047  |
| AK158869    | chr6  | 42244919  | 42254199  | 6330503C03R | 0,17031255 | 0,00164066 | 0,00438637  |
| AK144986    | chr13 | 96612430  | 96625923  | F2r1l       | 0,16969508 | 0,00738351 | 0,01168893  |
| NM_010638   | chr19 | 23208322  | 23234008  | Klf9        | 0,16969273 | 7,67E-05   | 0,00108714  |
| NM_011511   | chr6  | 142546355 | 142659440 | Abcc9       | 0,16928116 | 0,00106833 | 0,00345204  |
| BC056638    | chr8  | 74463252  | 74466423  | Bst2        | 0,16798605 | 0,00018493 | 0,00148795  |
| NM_021042   | chr6  | 142546354 | 142659495 | Abcc9       | 0,16773395 | 0,00087666 | 0,00308999  |
| NM_028584   | chr8  | 112842039 | 112851301 | Marveld3    | 0,16729428 | 0,00320436 | 0,00654935  |
| BC013738    | chr7  | 25396314  | 25413836  | Tgfb1       | 0,16694946 | 0,0002281  | 0,00163847  |
| NM_028615   | chr16 | 48229895  | 48239135  | Dppa2       | 0,16590585 | 8,02E-05   | 0,0011108   |
| NM_008958   | chr4  | 116594287 | 116612763 | Ptch2       | 0,16555663 | 8,25E-05   | 0,00112072  |
| NM_199299   | chr11 | 51656878  | 51700904  | Phf15       | 0,16501358 | 0,00290943 | 0,00615763  |
| NM_028804   | chr2  | 5055047   | 5148143   | Ccdc3       | 0,16486    | 0,00270645 | 0,00587828  |
| XM_621660   | chr5  | 31682530  | 31684186  | LOC546862   | 0,16438114 | 0,0010294  | 0,00338102  |
| NM_028064   | chr15 | 76439637  | 76444107  | Slc39a4     | 0,16411435 | 0,00259606 | 0,00573462  |
| AK166452    | chrX  | 67475594  | 67569355  | Mtm1        | 0,16394949 | 0,00112138 | 0,00654491  |
| NM_007807   | chrX  | 8593664   | 8626226   | Cybb        | 0,16339284 | 0,00133818 | 0,00393016  |
| AK028758    | chr1  | 12961034  | 12976391  | Slco5a1     | 0,16276924 | 0,0029656  | 0,00623666  |
| BC022741    | chr16 | 13900235  | 14014552  | 2900011O08R | 0,16237371 | 0,00174568 | 0,00452314  |
| BC036559    | chr11 | 9018109   | 9036172   | Upp1        | 0,16150305 | 0,00031327 | 0,006187523 |
| XM_979984   | chr13 | 65911576  | 65919505  | LOC665870   | 0,16138704 | 0,00038097 | 0,00205423  |
| BC027376    | chrX  | 7035344   | 7040389   | Pim2        | 0,16118693 | 0,00062201 | 0,00258427  |
| XM_487484   | chr17 | 40368224  | 40376239  | LOC435528   | 0,16046568 | 0,00118443 | 0,00366352  |
| NM_023872   | chr1  | 21387313  | 21946732  | Kcnq5       | 0,16024153 | 0,00152948 | 0,00420209  |
| NM_021704   | chr6  | 117134181 | 117140688 | Cxcl12      | 0,15967754 | 0,00092601 | 0,00318943  |
| NM_022409   | chr7  | 18736337  | 18739177  | Zfp296      | 0,159124   | 0,00565458 | 0,00968196  |
| NM_008116   | chr10 | 75017308  | 75029898  | Ggt1        | 0,15901778 | 0,00035424 | 0,00199684  |
| NM_008798   | chr1  | 95868710  | 95882959  | Pdcd1       | 0,15885143 | 0,00063208 | 0,00261515  |
| NM_173414   | chrX  | 8356931   | 8425044   | Lancl3      | 0,15797374 | 0,00178958 | 0,00459297  |
| BC012263    | chrX  | 7076870   | 7080193   | Pcsk1n      | 0,15794491 | 0,00194931 | 0,00484241  |
| NM_133888   | chr4  | 132005041 | 132029247 | Smpdl3b     | 0,15732829 | 0,00200255 | 0,00490922  |
| NM_028968   | chr16 | 13896376  | 13898199  | Ifitm7      | 0,1569837  | 0,00107677 | 0,00346637  |
| BC055897    | chr15 | 11789107  | 11850399  | Npr3        | 0,15611452 | 0,01054354 | 0,01539569  |
| NM_175493   | chr12 | 101277734 | 101288931 | Gpr68       | 0,15601068 | 7,59E-05   | 0,00108714  |
| XM_981132   | chr13 | 67289968  | 67297893  | LOC666037   | 0,15553955 | 0,00011635 | 0,00125214  |
| NM_018750   | chr1  | 133003955 | 133072724 | Rassf5      | 0,15516123 | 5,33E-06   | 0,00053609  |
| NM_00103771 | chr11 | 105824292 | 105850154 | Kcnh6       | 0,15419879 | 0,00694538 | 0,01117936  |
| XM_983672   | chr13 | 65654189  | 65661281  | LOC665764   | 0,1539496  | 0,00042057 | 0,00215045  |
| NM_011613   | chr14 | 77009004  | 77042170  | Tnfsf11     | 0,15365004 | 0,00235424 | 0,00537263  |
| AY138459    | chr16 | 22835570  | 22855085  | Fetub       | 0,15331492 | 0,00415697 | 0,007825    |
| XM_144880   | chr6  | 70886037  | 70890642  | LOC232077   | 0,15305796 | 0,0043197  | 0,00803559  |
| AK020367    | chr13 | 6618306   | 6647971   | Pfkp        | 0,15276331 | 0,00023906 | 0,0016811   |
| NM_153135   | chr8  | 30117985  | 30685572  | Unc5d       | 0,15207027 | 0,00289352 | 0,00612831  |
| XM_994750   | chr8  | 114911625 | 114914176 | LOC668172   | 0,1492804  | 0,00066415 | 0,00267725  |
| NM_00103489 | chrX  | 148459503 | 148473577 | LOC436240   | 0,14913182 | 8,11E-05   | 0,00111548  |
| NM_178695   | chr2  | 104631579 | 104650513 | Prrg4       | 0,14905569 | 0,00057388 | 0,00247984  |
| NM_010425   | chr4  | 99148316  | 99150639  | Foxd3       | 0,14783058 | 0,00273012 | 0,00590684  |
| AK043874    | chr3  | 55330534  | 55565364  | Dcamkl1     | 0,14766058 | 0,00434168 | 0,00806138  |
| NM_011075   | chr5  | 8804191   | 8872314   | Abcb1b      | 0,14557421 | 7,61E-05   | 0,00108714  |
| XM_983688   | chr14 | 41937677  | 41952315  | LOC666415   | 0,14524362 | 0,00012569 | 0,00131012  |
| XM_899153   | chr17 | 25930592  | 25934406  | Rgs11       | 0,14501627 | 0,00104741 | 0,00341051  |
| NM_007962   | chr9  | 44793551  | 44805007  | Eva1        | 0,14471971 | 0,00902098 | 0,01357473  |
| AK171510    | chr3  | 84752136  | 84771592  | 930117H01R  | 0,14446047 | 0,00653976 | 0,010771156 |
| NM_022995   | chr2  | 172870727 | 172919472 | Tmepai      | 0,14430468 | 0,0073514  | 0,01165667  |
| XM_983279   | chr14 | 41522208  | 41540858  | 1700091H14R | 0,14308721 | 0,00023914 | 0,0016811   |
| NM_144921   | chr7  | 24686926  | 24714655  | Atp1a3      | 0,14265149 | 0,00229068 | 0,00527298  |
| NM_007599   | chr6  | 72474045  | 72492482  | Capg        | 0,14238904 | 0,00013736 | 0,00133377  |
| NM_134207   | chr7  | 10786206  | 10787124  | V1rg6       | 0,14226342 | 0,00205566 | 0,00497067  |
| NM_008426   | chr2  | 55252541  | 55410911  | Kcnj3       | 0,14196954 | 0,00013464 | 0,0013321   |
| AK009830    | chr4  | 128607937 | 128613926 | Tmem54      | 0,14180431 | 6,70E-05   | 0,00103474  |
| NM_027836   | chr19 | 11388450  | 11403143  | Ms4a7       | 0,14151629 | 0,00268675 | 0,00586521  |
| BC087949    | chr8  | 74463252  | 74466418  | Bst2        | 0,14121579 | 7,85E-05   | 0,00109904  |
| XM_975361   | chr4  | 133615121 | 133625270 | Slc30a2     | 0,14082903 | 0,00062784 | 0,00260219  |
| AK082760    | chr13 | 67262662  | 67297883  | N/A         | 0,13989665 | 0,00074718 | 0,00283557  |
| NM_145736   | chrX  | 7035264   | 7040391   | Pim2        | 0,13980682 | 0,0001759  | 0,00145985  |
| AK036946    | chr2  | 125383350 | 125415589 | Shc4        | 0,13931186 | 0,00072466 | 0,00278557  |
| BC056462    | chrX  | 70046078  | 70077035  | Pdzd4       | 0,13924686 | 2,98E-05   | 0,00083399  |
| BC055401    | chr11 | 103147586 | 103148441 | N/A         | 0,13882892 | 0,00033715 | 0,00194858  |
| NM_183119   | chr13 | 66702693  | 66725698  | 2410141K09R | 0,13864332 | 0,00209142 | 0,00500766  |
| NM_053108   | chr13 | 76305913  | 76316151  | Glrx        | 0,13829364 | 0,00020222 | 0,00153257  |
| XM_981633   | chr6  | 48789914  | 48795671  | LOC666105   | 0,13817099 | 0,00010068 | 0,00117697  |
| XM_897327   | chr8  | 80910078  | 81002953  | LOC622803   | 0,13749681 | 0,00158169 | 0,00428833  |
| NM_009663   | chr5  | 149575406 | 149596895 | Alox5ap     | 0,13742122 | 0,00548239 | 0,00947406  |
| AK169442    | chr2  | 118406642 | 118420030 | Plcb2       | 0,13654389 | 0,00065954 | 0,00266798  |
| BC054791    | chr19 | 3323319   | 3385732   | Cpt1a       | 0,13646031 | 0,00130408 | 0,00386602  |
| BC032278    | chr15 | 99327810  | 99355702  | Faim2       | 0,13606834 | 0,00084053 | 0,00300624  |

|             |       |           |           |              |            |            |            |
|-------------|-------|-----------|-----------|--------------|------------|------------|------------|
| XM_985112   | chr14 | 43010394  | 43020466  | LOC666638    | 0,13574648 | 0,00048336 | 0,00231284 |
| BC003329    | chr6  | 39330368  | 39349965  | Mkrm1        | 0,13510441 | 0,01075109 | 0,01564721 |
| NM_053250   | chr17 | 45892130  | 45894960  | Crip3        | 0,13497524 | 0,0070035  | 0,01124478 |
| XM_485506   | chr4  | 152217689 | 152326130 | LOC433810    | 0,1348032  | 0,00036884 | 0,0020418  |
| NM_025452   | chr4  | 128607919 | 128613889 | Tmem54       | 0,13459748 | 0,00023738 | 0,0016811  |
| NM_009477   | chr11 | 9018105   | 9036167   | Upp1         | 0,13447159 | 0,0001005  | 0,00117697 |
| NM_153099   | chr9  | 110643000 | 110648560 | Tessp2       | 0,13383463 | 0,00071967 | 0,00278211 |
| S62952      | chr1  | 169454983 | 169476296 | Rxrg         | 0,13295071 | 0,00178702 | 0,00459136 |
| NM_022987   | chr14 | 121594339 | 121600838 | Zic5         | 0,13106672 | 0,00123933 | 0,00374691 |
| NM_198677   | chr14 | 43421994  | 43428218  | BC061237     | 0,13097469 | 0,00035101 | 0,00198928 |
| NM_00102561 | chr19 | 11388457  | 11403161  | Ms4a7        | 0,13078751 | 0,00212204 | 0,00502048 |
| AK137759    | chr17 | 35141253  | 35142698  | Psors1c2     | 0,13043684 | 0,00021599 | 0,00059373 |
| NM_027238   | chr4  | 82698072  | 82795420  | 1810054D07R  | 0,12995073 | 0,0003197  | 0,00189658 |
| NM_009574   | chr14 | 121610614 | 121615032 | Zic2         | 0,12956908 | 0,00104512 | 0,00340917 |
| NM_177049   | chr14 | 54060896  | 54070349  | Jph4         | 0,12944579 | 2,75E-05   | 0,00080751 |
| NM_177841   | chr2  | 26093655  | 26116566  | 4932418E24R  | 0,12943054 | 0,00059082 | 0,00252508 |
| BC016468    | chr19 | 46185214  | 46188618  | Elov13       | 0,1293567  | 0,00126186 | 0,00379403 |
| XM_891604   | chr14 | 40636938  | 40642180  | LOC623168    | 0,12903968 | 0,00012998 | 0,00131796 |
| AK155869    | chr1  | 133003963 | 133027681 | Rassf5       | 0,12858195 | 3,74E-06   | 0,00049484 |
| NM_00102986 | chrX  | 70046076  | 70077689  | Pdzd4        | 0,12853709 | 1,69E-05   | 0,00063799 |
| XM_991187   | chr13 | 50111464  | 50116542  | LOC667552    | 0,1285077  | 8,96E-06   | 0,00054925 |
| BC052049    | chr14 | 54060896  | 54069506  | Jph4         | 0,12840767 | 8,82E-05   | 0,00112072 |
| NM_031174   | chr16 | 96697641  | 97275645  | Dscam        | 0,12826386 | 0,0023585  | 0,00537719 |
| XM_979811   | chr13 | 65798500  | 65827477  | LOC665843    | 0,12799121 | 4,39E-06   | 0,00050284 |
| XM_131647   | chr4  | 124993134 | 125210652 | Grik3        | 0,12736464 | 0,00126387 | 0,00379799 |
| BC024402    | chr19 | 11388439  | 11403139  | Ms4a7        | 0,12726962 | 0,00058324 | 0,00250706 |
| NM_133715   | chr11 | 103147589 | 103160792 | Arhgap27     | 0,12635926 | 0,00013343 | 0,0013321  |
| XM_982603   | chr14 | 41108384  | 41135065  | LOC666253    | 0,12543774 | 0,00412397 | 0,00779519 |
| NM_007588   | chr6  | 3635733   | 3718616   | Calcr        | 0,1253879  | 0,00158421 | 0,00429125 |
| XM_985370   | chr14 | 43354983  | 43360426  | LOC666678    | 0,12445908 | 0,00034093 | 0,00195919 |
| XM_982721   | chr14 | 41171114  | 41186756  | LOC666280    | 0,12415808 | 7,74E-05   | 0,00109305 |
| AK006538    | chr9  | 39898692  | 39901445  | 1700030E15R  | 0,12379944 | 6,07E-05   | 0,00102407 |
| BC031918    | chr6  | 25618535  | 25639858  | Gpr37        | 0,12333008 | 0,00136253 | 0,00396263 |
| BC089536    | chr14 | 41466801  | 41472166  | 1700001F09Ri | 0,12303068 | 0,00026395 | 0,00174734 |
| BC071229    | chrX  | 8593836   | 8626238   | Cybb         | 0,12278475 | 0,00071687 | 0,00278211 |
| NM_00103377 | chr10 | 75381436  | 75384388  | Gm867        | 0,12249488 | 0,00351987 | 0,00696498 |
| XM_888689   | chr11 | 56302726  | 56305927  | LOC624168    | 0,1215667  | 0,00437639 | 0,00811068 |
| NM_011851   | chr9  | 88125532  | 88169982  | Nt5e         | 0,12118335 | 0,00016895 | 0,00143675 |
| NM_027940   | chr14 | 42222250  | 42227678  | 1700001F09Ri | 0,12108063 | 0,00011087 | 0,00122629 |
| NM_177293   | chrX  | 53144748  | 53169026  | 4933424A10R  | 0,12037658 | 7,48E-06   | 0,00053713 |
| AK039161    | chr6  | 3635733   | 3714654   | Calcr        | 0,11980694 | 0,00467122 | 0,00849015 |
| XM_985438   | chr14 | 43440761  | 43443540  | LOC666692    | 0,11940733 | 0,00031882 | 0,00189521 |
| BC046383    | chr19 | 3349187   | 3385732   | Cpt1a        | 0,11927498 | 0,00060461 | 0,0025385  |
| AK079888    | chr19 | 11388083  | 11401740  | Ms4a7        | 0,11815479 | 0,0009948  | 0,00333953 |
| BC096764    | chrX  | 53144641  | 53169110  | 4933424A10R  | 0,11678741 | 7,39E-06   | 0,00053713 |
| XM_983137   | chr14 | 41437297  | 41443074  | LOC666338    | 0,11669948 | 7,13E-05   | 0,00105819 |
| NM_00100382 | chr14 | 54065370  | 54069508  | Jph4         | 0,11664853 | 0,00212382 | 0,0050207  |
| NM_013495   | chr19 | 3334512   | 3385732   | Cpt1a        | 0,11647186 | 0,00120658 | 0,00370572 |
| NM_010934   | chr8  | 69632836  | 69635097  | Gm906        | 0,11639519 | 0,00298375 | 0,00625639 |
| AK138728    | chr3  | 101404960 | 101416981 | Cd2          | 0,11548788 | 0,00731197 | 0,01160467 |
| AK047716    | chr3  | 55549900  | 55610211  | Dcamk11      | 0,11543132 | 0,00080302 | 0,0029513  |
| XM_983444   | chr14 | 41713411  | 41721095  | LOC666376    | 0,11525384 | 9,21E-05   | 0,00113271 |
| BC061060    | chr14 | 41466801  | 41472185  | 1700001F09Ri | 0,1149103  | 4,24E-05   | 0,0008919  |
| NM_178394   | chr5  | 37339164  | 37413544  | Jakmp1       | 0,11472964 | 0,00209359 | 0,00500841 |
| NM_011852   | chr5  | 121136758 | 121148215 | Oas1g        | 0,11463372 | 0,0033145  | 0,00669411 |
| NM_009401   | chr4  | 144535662 | 144581834 | Tnfrsf8      | 0,11426457 | 0,00040264 | 0,00209367 |
| NM_00103343 | chr13 | 50257677  | 50262805  | Gm906        | 0,11419858 | 2,59E-05   | 0,00079427 |
| U86587      | chr4  | 148494439 | 148507084 | Pik3cd       | 0,11414846 | 4,98E-07   | 0,00029564 |
| AK153376    | chr9  | 20766387  | 20771406  | N/A          | 0,11409995 | 0,00017947 | 0,0014688  |
| XM_983581   | chr14 | 41867750  | 41873604  | LOC666396    | 0,113974   | 0,00033827 | 0,00194858 |
| NM_172451   | chr15 | 100519847 | 100557410 | Galnt6       | 0,11389555 | 6,58E-05   | 0,00102744 |
| XM_888715   | chr14 | 40311597  | 40316988  | LOC624191    | 0,11349338 | 1,70E-05   | 0,00063799 |
| AB211064    | chr4  | 98218765  | 98230488  | AB211064     | 0,11341316 | 0,00227598 | 0,00525945 |
| XM_984060   | chr14 | 42109698  | 42115171  | LOC666471    | 0,11336601 | 2,95E-05   | 0,00083399 |
| XM_284589   | chr14 | 41764296  | 41767776  | LOC624392    | 0,11259438 | 4,47E-05   | 0,00090272 |
| BC005618    | chr17 | 87545048  | 87559229  | Tacstd1      | 0,11254002 | 0,00053502 | 0,00240012 |
| NM_013415   | chr11 | 69415947  | 69422024  | Atp1b2       | 0,1120468  | 0,00198312 | 0,00488974 |
| XM_975859   | chr4  | 124993134 | 125210328 | Grik3        | 0,11202842 | 0,00087821 | 0,00309268 |
| BC038395    | chr19 | 3349187   | 3385256   | Cpt1a        | 0,11179571 | 0,00102377 | 0,00337061 |
| XM_988677   | chr14 | 40786193  | 40791622  | LOC666152    | 0,11145089 | 6,38E-05   | 0,00102744 |
| BC094465    | chr17 | 87545023  | 87559453  | Tacstd1      | 0,1111721  | 0,00082691 | 0,0029879  |
| XM_985276   | chr14 | 43187221  | 43189829  | LOC666667    | 0,11034017 | 0,00548037 | 0,00947346 |
| XM_985343   | chr14 | 43228819  | 43250708  | LOC666675    | 0,11022347 | 0,00036452 | 0,00202686 |
| NM_053248   | chr8  | 73812490  | 73821713  | Slc5a5       | 0,11004534 | 0,0067238  | 0,01094684 |
| XM_982757   | chr14 | 41193108  | 41198535  | LOC666285    | 0,10992692 | 1,69E-05   | 0,00063799 |
| XM_982027   | chr14 | 40356456  | 40362221  | LOC666156    | 0,10988198 | 0,00012127 | 0,00128228 |

|             |       |           |           |             |            |            |            |
|-------------|-------|-----------|-----------|-------------|------------|------------|------------|
| AK138275    | chr6  | 3635728   | 3714713   | Calcr       | 0,10962104 | 0,00137147 | 0,00397356 |
| NM_008532   | chr17 | 87545033  | 87559453  | Tacstd1     | 0,10961851 | 0,00074928 | 0,00283811 |
| NM_173047   | chr16 | 93571758  | 93579527  | Cbr3        | 0,10937918 | 0,00056448 | 0,00245116 |
| XM_982176   | chr14 | 40458832  | 40464290  | LOC666186   | 0,10909524 | 5,67E-05   | 0,00100585 |
| NM_177347   | chr4  | 88114871  | 88115690  | Ifna13      | 0,10825708 | 0,00162227 | 0,00435871 |
| NM_019507   | chr11 | 96914160  | 96931370  | Tbx21       | 0,10825383 | 5,75E-06   | 0,00053609 |
| XM_889466   | chr14 | 43608193  | 43613653  | LOC624927   | 0,10718191 | 0,00010057 | 0,00117697 |
| BC099454    | chr7  | 18735882  | 18739171  | Zfp296      | 0,10682565 | 0,00229363 | 0,00527774 |
| BC005440    | chr14 | 43910479  | 43924545  | Ptger2      | 0,10646959 | 3,29E-05   | 0,00083399 |
| NM_011642   | chr4  | 152902643 | 152984008 | Trp73       | 0,10643098 | 0,00016628 | 0,00143051 |
| XM_983726   | chr14 | 41951008  | 41956504  | LOC666420   | 0,10528146 | 3,15E-05   | 0,00083399 |
| AK144590    | chr11 | 101585833 | 101601352 | Etv4        | 0,10515748 | 1,29E-05   | 0,00059696 |
| NM_00101247 | chr6  | 117134181 | 117146986 | Cxcl12      | 0,10483168 | 0,00044581 | 0,00222979 |
| XM_984793   | chr14 | 42602119  | 42664608  | LOC666590   | 0,10418191 | 9,94E-05   | 0,00116936 |
| XM_984287   | chr14 | 42290693  | 42296211  | LOC666502   | 0,10338867 | 0,00019443 | 0,0015124  |
| NM_181988   | chr6  | 137019020 | 137134697 | Relg        | 0,1024913  | 0,00014311 | 0,00135008 |
| NM_177781   | chr1  | 14857861  | 14904076  | Trpa1       | 0,10237557 | 0,00048588 | 0,00231561 |
| BC099876    | chr1  | 182531197 | 182533709 | Mixl1       | 0,10233371 | 0,00023338 | 0,0016624  |
| NM_025782   | chr4  | 82693181  | 82696358  | 9130422G05R | 0,10187486 | 0,00016447 | 0,00142787 |
| AK007856    | chr4  | 82730428  | 82795420  | 1810054D07R | 0,10180615 | 3,15E-05   | 0,00059399 |
| BC083147    | chr10 | 77453101  | 77466744  | Dnmt3l      | 0,10105949 | 0,00075936 | 0,00286538 |
| AK132967    | chr15 | 100108870 | 100121087 | 4930478A21R | 0,09972991 | 6,62E-05   | 0,00102744 |
| XM_985174   | chr14 | 43077533  | 43083000  | LOC666647   | 0,09966218 | 7,40E-05   | 0,00108199 |
| XM_983023   | chr14 | 41357308  | 41370788  | LOC666318   | 0,09941495 | 0,0001654  | 0,00143051 |
| NM_010136   | chr9  | 118327041 | 118334830 | Eomes       | 0,09886498 | 0,01074807 | 0,01564721 |
| AK037490    | chr3  | 50512164  | 50539808  | Slc7a11     | 0,09845057 | 0,00063618 | 0,00261872 |
| NM_008815   | chr11 | 101585840 | 101601353 | Etv4        | 0,09801547 | 6,48E-05   | 0,00102744 |
| BC012963    | chr14 | 50827233  | 50835295  | Ndrq2       | 0,09774387 | 0,00026239 | 0,0017471  |
| AY214462    | chr1  | 122054198 | 122100734 | Steap3      | 0,09745387 | 0,00123435 | 0,00374691 |
| BC037435    | chr1  | 122054966 | 122092804 | Steap3      | 0,09704628 | 0,00088965 | 0,00310958 |
| NM_013864   | chr14 | 50827231  | 50835302  | Ndrq2       | 0,09704    | 0,00024929 | 0,00170185 |
| XM_885089   | chr7  | 85097702  | 85110947  | LOC620697   | 0,0966031  | 7,48E-05   | 0,0018714  |
| NM_011990   | chr3  | 50461130  | 50539808  | Slc7a11     | 0,09653907 | 0,00143693 | 0,00406212 |
| XM_620914   | chr14 | 43004323  | 43008482  | LOC546249   | 0,09626999 | 4,01E-06   | 0,00049484 |
| XM_889130   | chr14 | 42453250  | 42459126  | LOC624587   | 0,09595244 | 0,0007183  | 0,00278211 |
| BC066045    | chr4  | 152902081 | 152940860 | Trp73       | 0,0953685  | 0,00178026 | 0,00458484 |
| XM_982314   | chr14 | 40576043  | 40581515  | LOC666207   | 0,09528745 | 2,85E-05   | 0,00082754 |
| NM_144547   | chr15 | 102273453 | 102282664 | Amhr2       | 0,09512005 | 0,00015957 | 0,00141569 |
| AK142584    | chr5  | 66304676  | 66430090  | BC013481    | 0,09416165 | 0,0016656  | 0,00441792 |
| NM_011618   | chr7  | 4107749   | 4119062   | Tnnt1       | 0,09355834 | 0,00018126 | 0,00147387 |
| AK158900    | chr14 | 50827233  | 50835347  | Ndrq2       | 0,09337219 | 0,00024571 | 0,00169747 |
| XM_982411   | chr14 | 40697556  | 40711033  | 1700016D02R | 0,09292496 | 9,81E-05   | 0,00116469 |
| NM_013729   | chr1  | 182529717 | 182533709 | Mixl1       | 0,0924989  | 0,00011754 | 0,00126041 |
| NM_007424   | chr7  | 78926995  | 78988612  | Agc1        | 0,09231464 | 0,00016511 | 0,00143051 |
| NM_007494   | chr2  | 31292278  | 31342679  | Ass1        | 0,09098757 | 0,0020482  | 0,00496194 |
| BC020085    | chr4  | 82693508  | 82694122  | 9130422G05R | 0,08996702 | 1,78E-05   | 0,00064214 |
| NM_007974   | chr13 | 96612430  | 96634965  | F2rl1       | 0,08989492 | 0,00037304 | 0,00204961 |
| NM_013486   | chr3  | 101404968 | 101417000 | Cd2         | 0,08936498 | 0,00219402 | 0,00513978 |
| XM_139038   | chr14 | 49711199  | 49717673  | Gm288       | 0,08918635 | 7,86E-05   | 0,00109904 |
| NM_023805   | chr9  | 107509255 | 107525475 | Slc38a3     | 0,08895668 | 7,16E-06   | 0,00053713 |
| NM_00101736 | chr4  | 41912902  | 41918863  | Arid3c      | 0,08825591 | 0,00015089 | 0,00138265 |
| XM_982515   | chr14 | 41031291  | 41044769  | LOC666239   | 0,08803941 | 5,33E-05   | 0,00097866 |
| NM_011405   | chr14 | 53324493  | 53371884  | Slc7a7      | 0,08779058 | 0,00184111 | 0,00467691 |
| XM_145466   | chr7  | 26373986  | 26395190  | LOC243881   | 0,08730915 | 0,00144945 | 0,00408202 |
| NM_011361   | chr10 | 21684111  | 21689308  | Sgk         | 0,08696367 | 8,48E-05   | 0,00112072 |
| BC004845    | chrX  | 94760970  | 95093500  | Ophn1       | 0,08662036 | 1,07E-06   | 0,00035401 |
| XM_985481   | chr14 | 43444222  | 43457186  | LOC666699   | 0,08657814 | 0,00090696 | 0,00314745 |
| NM_008003   | chr7  | 144705921 | 144710343 | Fgf15       | 0,08657574 | 0,00335812 | 0,00674566 |
| NM_009142   | chr8  | 97661354  | 97671556  | Cx3cl1      | 0,08597196 | 0,00036846 | 0,00204162 |
| BC024387    | chr4  | 126827540 | 126832833 | Gjb3        | 0,08562247 | 0,00420416 | 0,00787718 |
| AK083556    | chr13 | 115573167 | 115579608 | N/A         | 0,08521276 | 0,00335056 | 0,006735   |
| BC070401    | chr10 | 21571599  | 21689307  | Sgk         | 0,08475722 | 1,87E-05   | 0,00066248 |
| D10584      | chr2  | 38523330  | 38533197  | Nr5a1       | 0,08422876 | 0,00071317 | 0,00278211 |
| NM_019959   | chr11 | 118249942 | 118266053 | C1qtnf1     | 0,08370185 | 6,59E-06   | 0,00053713 |
| NM_010910   | chr14 | 67037213  | 67041075  | Nefl        | 0,08366511 | 3,45E-05   | 0,00083399 |
| NM_00103333 | chr17 | 23357079  | 23372891  | Mmp25       | 0,08353782 | 0,00019066 | 0,00149871 |
| NM_011332   | chr8  | 97699597  | 97701165  | Ccl17       | 0,08350424 | 0,00086197 | 0,00305716 |
| BC021328    | chr7  | 144705940 | 144710336 | Fgf15       | 0,0832313  | 0,00386112 | 0,00746225 |
| NM_052976   | chrX  | 94760233  | 95093704  | Ophn1       | 0,0830657  | 7,72E-06   | 0,00054145 |
| BC026595    | chr17 | 31341349  | 31365851  | Cbs         | 0,08276263 | 0,00034176 | 0,00195919 |
| BC051644    | chrX  | 134680253 | 134684532 | Trap1a      | 0,08234701 | 0,00078191 | 0,00291724 |
| NM_008126   | chr4  | 126827538 | 126831465 | Gjb3        | 0,08124766 | 0,00467229 | 0,00849015 |
| NM_144855   | chr17 | 31341353  | 31365851  | Cbs         | 0,07962434 | 0,00023964 | 0,0016811  |
| AK146062    | chr10 | 21684101  | 21689314  | Sgk         | 0,07918678 | 3,26E-05   | 0,00083399 |
| BC052773    | chr7  | 30156296  | 30165719  | Kirrel2     | 0,07896972 | 5,15E-05   | 0,00096319 |
| NM_019448   | chr10 | 77452970  | 77466744  | Dnmt3l      | 0,07861872 | 0,0026597  | 0,00582814 |



|             |       |           |           |             |            |            |            |
|-------------|-------|-----------|-----------|-------------|------------|------------|------------|
| NM_008046   | chr13 | 115574218 | 115579464 | Fst         | 0,0779286  | 0,000603   | 0,00253756 |
| XM_993727   | chr7  | 26400235  | 26408896  | LOC667995   | 0,07680958 | 0,00102479 | 0,00337061 |
| NM_010493   | chr9  | 20766361  | 20779199  | Icam1       | 0,07607854 | 0,00033384 | 0,0019437  |
| BC049894    | chr11 | 118244605 | 118266052 | C1qtnf1     | 0,07503184 | 3,44E-05   | 0,00083399 |
| NM_172898   | chr7  | 30156525  | 30166275  | Kirrel2     | 0,07484951 | 0,00038894 | 0,00206033 |
| NM_020576   | chr17 | 35141321  | 35142698  | Psors1c2    | 0,07284245 | 2,91E-06   | 0,00048602 |
| XM_486585   | chr14 | 42091707  | 42092659  | LOC640992   | 0,07230086 | 4,23E-06   | 0,00049484 |
| NM_00100396 | chr2  | 153340894 | 153379168 | Dnmt3b      | 0,0699417  | 7,04E-06   | 0,00053713 |
| BC061190    | chr10 | 75379581  | 75381460  | Ndg2        | 0,06988452 | 0,00021382 | 0,00158443 |
| NM_009382   | chr9  | 43796948  | 43799573  | Thy1        | 0,0696059  | 7,88E-05   | 0,00109904 |
| NM_029528   | chr6  | 42247390  | 42254187  | 6330503C03R | 0,06911583 | 0,00047374 | 0,00229442 |
| AK032424    | chr3  | 55549844  | 55624480  | Dcamkl1     | 0,06879989 | 0,00059033 | 0,00052491 |
| AK010666    | chr6  | 92207567  | 92210152  | Trh         | 0,06772051 | 0,00047076 | 0,00229116 |
| Z11981      | chr15 | 62007858  | 62014417  | Pvt1        | 0,06769392 | 2,13E-06   | 0,00044396 |
| BC008626    | chr9  | 20766406  | 20779215  | Icam1       | 0,06766843 | 0,00019298 | 0,00150596 |
| BC105922    | chr2  | 153341057 | 153379168 | Dnmt3b      | 0,06753676 | 1,06E-05   | 0,00056386 |
| AK139445    | chr6  | 48789914  | 48795669  | N/A         | 0,06747967 | 3,10E-05   | 0,00083399 |
| NM_178224   | chr17 | 31341353  | 31365841  | Cbs         | 0,06675949 | 0,00021546 | 0,00159242 |
| XM_357051   | chr19 | 11368293  | 11381378  | Gm1276      | 0,06647796 | 1,33E-05   | 0,00060231 |
| BC104312    | chr7  | 144670894 | 144714653 | Fgf4        | 0,06538529 | 0,00324816 | 0,00060715 |
| NM_010205   | chr19 | 45790128  | 45796184  | Fgf8        | 0,0640419  | 0,00117854 | 0,00365498 |
| BC071227    | chr5  | 98494512  | 98517334  | Fgf5        | 0,06216142 | 0,00066869 | 0,00268282 |
| AK047763    | chr6  | 42247390  | 42254172  | 6330503C03R | 0,06188585 | 0,00030362 | 0,00185674 |
| BC042894    | chr7  | 24687262  | 24714697  | Atp1a3      | 0,06059419 | 0,00014842 | 0,00137186 |
| XM_985614   | chr14 | 43535440  | 43540905  | LOC666723   | 0,06014825 | 0,00336221 | 0,00675104 |
| XM_889107   | chr5  | 98297121  | 98297286  | LOC435856   | 0,05988548 | 0,00027656 | 0,00178148 |
| NM_019978   | chr3  | 55330556  | 55624607  | Dcamkl1     | 0,05926045 | 0,00111517 | 0,00353676 |
| BC034645    | chr7  | 24686926  | 24714653  | Atp1a3      | 0,05919572 | 6,81E-05   | 0,00103864 |
| BC108964    | chr16 | 45143668  | 45170589  | Btla        | 0,05854014 | 8,48E-05   | 0,00112072 |
| NM_009918   | chr1  | 37163806  | 37207930  | Cnga3       | 0,05779973 | 1,94E-05   | 0,00067238 |
| BC025104    | chr4  | 107663422 | 107677239 | Echdc2      | 0,05766501 | 1,89E-06   | 0,00043275 |
| AK036474    | chr14 | 43910542  | 43913193  | Ptger2      | 0,05761227 | 7,04E-05   | 0,00105565 |
| NM_013912   | chrX  | 44269772  | 44279461  | Apln        | 0,05750482 | 6,14E-05   | 0,00102496 |
| AK034683    | chr19 | 6404740   | 6409668   | Rasgrp2     | 0,05742688 | 9,04E-05   | 0,00112805 |
| NM_009374   | chr2  | 129703789 | 129740002 | Tgm3        | 0,05576872 | 3,99E-05   | 0,00088495 |
| NM_172786   | chr10 | 19402002  | 19449469  | Il20ra      | 0,05556628 | 8,56E-06   | 0,00054898 |
| NM_172563   | chr11 | 90154654  | 90206985  | Hlf         | 0,05462973 | 0,00167519 | 0,00443691 |
| NM_183109   | chr15 | 100108859 | 100113701 | 4930478A21R | 0,05438553 | 2,72E-05   | 0,00080751 |
| NM_010203   | chr5  | 98494485  | 98517332  | Fgf5        | 0,05406192 | 0,00046887 | 0,00228602 |
| AK017662    | chr6  | 42296648  | 42302842  | Epha1       | 0,05244419 | 0,00123902 | 0,00374691 |
| NM_023456   | chr6  | 49752314  | 49759093  | Npy         | 0,05218238 | 7,87E-05   | 0,00109904 |
| NM_011635   | chrX  | 134680046 | 134684529 | Trap1a      | 0,05179835 | 0,00072253 | 0,00278211 |
| AK139633    | chr4  | 152902311 | 152940973 | Trp73       | 0,05045321 | 1,09E-05   | 0,00056386 |
| NM_144841   | chr14 | 47579629  | 47587057  | Otx2        | 0,05030899 | 1,25E-05   | 0,00059498 |
| BC017609    | chr14 | 47580136  | 47584823  | Otx2        | 0,05009904 | 5,10E-05   | 0,00095622 |
| BC019531    | chr1  | 89095548  | 89142011  | Efh1        | 0,04974999 | 1,17E-05   | 0,00058108 |
| BC108963    | chr16 | 45143668  | 45170589  | Btla        | 0,04958795 | 0,00014448 | 0,00135862 |
| BC100555    | chr9  | 99683463  | 99685522  | Sox14       | 0,04937176 | 0,00131898 | 0,00388717 |
| BC027104    | chr14 | 47580136  | 47589453  | Otx2        | 0,04931203 | 1,92E-05   | 0,00067238 |
| NM_011898   | chr18 | 38712238  | 38727242  | Spry4       | 0,04851854 | 0,00022073 | 0,00161667 |
| NM_178446   | chr5  | 66297780  | 66430064  | BC013481    | 0,048046   | 0,0006503  | 0,00265372 |
| BC096649    | chr18 | 67469105  | 67493140  | Cidea       | 0,04706614 | 0,00022368 | 0,00162319 |
| BC034195    | chr5  | 66297754  | 66360112  | BC013481    | 0,0467729  | 0,00104894 | 0,00341362 |
| AK131980    | chr19 | 45790123  | 45796170  | Fgf8        | 0,04446796 | 0,00010455 | 0,00120101 |
| NM_146615   | chr9  | 39937687  | 39938626  | Olfir986    | 0,04441734 | 3,92E-05   | 0,000881   |
| NM_028889   | chr1  | 89095534  | 89141962  | Efh1        | 0,04393304 | 2,75E-05   | 0,00080751 |
| NM_00103771 | chr16 | 45143668  | 45172227  | Btla        | 0,04329978 | 8,29E-05   | 0,00112072 |
| NM_177857   | chr3  | 103256616 | 103298799 | Dennd2c     | 0,04307029 | 2,01E-06   | 0,00044359 |
| BC048734    | chr19 | 45790109  | 45796185  | Fgf8        | 0,04296642 | 3,09E-05   | 0,00083399 |
| NM_139065   | chr5  | 66297885  | 66378684  | BC013481    | 0,04230875 | 0,00060995 | 0,00255374 |
| AK044389    | chr3  | 103231722 | 103286333 | Dennd2c     | 0,04192409 | 1,15E-06   | 0,00035401 |
| AK079068    | chr11 | 90155079  | 90205738  | Hlf         | 0,04171596 | 0,00090291 | 0,00314253 |
| NM_013633   | chr17 | 35114103  | 35118822  | Pou5f1      | 0,04139843 | 0,00035946 | 0,00201118 |
| BC068268    | chr17 | 35114124  | 35118817  | Pou5f1      | 0,03959961 | 0,00031094 | 0,00186879 |
| NM_029529   | chr10 | 19537332  | 19540875  | Slc35d3     | 0,03910319 | 0,00132455 | 0,00389974 |
| NM_153512   | chr17 | 83494282  | 83540221  | Kcng3       | 0,03611178 | 6,25E-06   | 0,00053609 |
| NM_008315   | chr19 | 36025415  | 36122486  | Htr7        | 0,03604559 | 8,29E-05   | 0,00112072 |
| BC057693    | chr11 | 90155241  | 90204297  | Hlf         | 0,03531325 | 0,00079277 | 0,00293444 |
| NM_175651   | chr5  | 28536249  | 28568660  | 9630008K15R | 0,03471701 | 0,00021238 | 0,00158274 |
| NM_139051   | chr2  | 38514635  | 38536512  | Nr5a1       | 0,03401001 | 0,00103957 | 0,00340356 |
| NM_009107   | chr1  | 169435058 | 169476298 | Rxrg        | 0,03230527 | 8,83E-06   | 0,00054925 |
| BC096464    | chr5  | 28533233  | 28576575  | 9630008K15R | 0,03185345 | 0,00085218 | 0,00303508 |
| AK010332    | chr6  | 122673212 | 122680251 | Nanog       | 0,03180991 | 0,00135054 | 0,00395089 |
| NM_025416   | chr3  | 94427502  | 94432753  | Them5       | 0,02865697 | 0,00052749 | 0,00238689 |
| BC046437    | chr3  | 94427520  | 94432756  | Them5       | 0,0277492  | 0,000443   | 0,00222131 |
| BC110476    | chr2  | 38515810  | 38536494  | Nr5a1       | 0,02744315 | 0,00236326 | 0,00538599 |

|             |       |           |           |              |            |            |            |
|-------------|-------|-----------|-----------|--------------|------------|------------|------------|
| NM_00103377 | chr12 | 85532643  | 85541203  | 7420416P09Ri | 0,02593493 | 0,00032288 | 0,00190758 |
| AK018094    | chr10 | 19537336  | 19538742  | Slc35d3      | 0,02587627 | 0,00011573 | 0,00125001 |
| NM_023580   | chr6  | 42288093  | 42302875  | Epha1        | 0,02577263 | 0,00018605 | 0,00149294 |
| NM_009482   | chr7  | 139795175 | 139796432 | Utf1         | 0,02473601 | 0,00045396 | 0,00225577 |
| XM_131619   | chr4  | 107679669 | 107716151 | BC022150     | 0,02393972 | 0,00012237 | 0,00128279 |
| NM_009660   | chr11 | 70160347  | 70168210  | Alox15       | 0,02172485 | 9,20E-06   | 0,00054925 |
| BC056625    | chr11 | 70160343  | 70168212  | Alox15       | 0,02110273 | 2,14E-05   | 0,00069344 |
| AK010589    | chr7  | 139795141 | 139796426 | Utf1         | 0,02105996 | 0,00050568 | 0,00234312 |
| NM_015744   | chr15 | 54668983  | 54750085  | Enpp2        | 0,01917012 | 0,0001213  | 0,00128228 |
| NM_009290   | chr18 | 34667113  | 34673074  | Wnt8a        | 0,01774082 | 4,02E-05   | 0,00088495 |
| NM_00100542 | chr9  | 44830177  | 44858846  | Amica1       | 0,01515562 | 2,10E-05   | 0,00069344 |
| AK088491    | chr15 | 54669351  | 54750101  | Enpp2        | 0,01217962 | 0,00081752 | 0,00297684 |
| BC052646    | chr9  | 110784425 | 110790905 | Tdgf1        | 0,010033   | 0,00206159 | 0,00497417 |
| NM_009309   | chr17 | 8272596   | 8280670   | T            | 0,0083852  | 0,00073968 | 0,00282146 |
| XM_884793   | chr16 | 3645485   | 3646344   | LOC620395    | 0,00718428 | 0,00332994 | 0,0067094  |
| NM_021480   | chr14 | 62446456  | 62463202  | Tdh          | 0,00593803 | 0,00101988 | 0,00337061 |
