# Supplementary material for: Dynamic hydroxymethylation of deoxyribonucleic acid marks differentiation-associated enhancers
Source: PubMed Central journal article supplement — Nucleic Acids Res. 2012 Jun 21;40(17):8255–65. doi: 10.1093/nar/gks595 (PMC3458548; doi:10.1093/nar/gks595), 2012-06-21
Supplement: supp_gks595_nar-01065-v-2012-File006.pdf [file supp_gks595_nar-01065-v-2012-File006.pdf]

Supplementary Table 3: List of genes significantly affected upon 3T3-L1 differentiation

| ID        | CHROMOSOME | START      | STOP      | Gene name     | Signal ratio (+DC/-DC) | raw p value | BH corrected p value |
|-----------|------------|------------|-----------|---------------|------------------------|-------------|----------------------|
| NM_009605 | chr16      | 23155287   | 23158101  | Adipoq        | 1911,209216            | 0,00021119  | 0,00327926           |
| NM_013459 | chr10      | 79353622   | 79355400  | Cfd           | 1126,233301            | 0,00071518  | 0,0042683            |
| NM_008059 | chr1       | 195098356  | 195099405 | G0s2          | 773,3351616            | 0,00041063  | 0,0038065            |
| BC009165  | chr7       | 104561445  | 104566240 | Thrsp         | 678,4412125            | 0,00019056  | 0,00322705           |
| BB221402  | chr6       | 113374628  | 113384506 | Cidec         | 559,1242082            | 0,00019723  | 0,00326825           |
| BB144871  | chr7       | 86865103   | 86865348  | BB144871      | 556,4892468            | 6,15E-05    | 0,00294864           |
| AV325919  |            | NA         | NA        | Atp1a2        | 374,681257             | 0,00021142  | 0,00327926           |
| AY079153  | chr16      | 90738353   | 90750030  | Mrap          | 258,4918528            | 0,00117595  | 0,00487791           |
| NM_022984 | chr8       | 3655769    | 3657392   | Retn          | 250,1093185            | 9,84E-05    | 0,00305957           |
| NM_009381 | chr7       | 104565363  | 104566086 | Thrsp         | 210,5866251            | 0,00122061  | 0,00493649           |
| NM_011921 | chr19      | 20767443   | 20802046  | Aldh1a7       | 200,3897631            | 0,00033654  | 0,00358663           |
| BI413218  | chr8       | 47556426   | 47620854  | Acsl1         | 199,5539464            | 6,36E-05    | 0,00294864           |
| BE628912  | chr4       | 63009598   | 63009196  | Orm1          | 186,4073583            | 0,00047481  | 0,00388445           |
| NM_007751 | chr7       | 148084840  | 148086345 | Cox8b         | 183,4616869            | 0,00027652  | 0,00335239           |
| NM_007469 | chr7       | 20274829   | 20277922  | Apoc1         | 182,0997334            | 0,00018035  | 0,00322705           |
| BB534670  | chr5       | 17287507   | 17341714  | Cd36          | 153,5729165            | 0,00098389  | 0,00460391           |
| AW106963  | chr2       | 172978576  | 172984771 | Pck1          | 147,1154545            | 0,00024551  | 0,0033347            |
| AY092026  | chr2       | 158328278  | 158333934 | Adig          | 139,7795987            | 0,00235581  | 0,00632421           |
| BB224790  | chr8       | 28336237   | 28336876  | Adrb3         | 136,710477             | 4,50E-05    | 0,00283532           |
| BC002148  | chr3       | 10204181   | 10206398  | Fabp4         | 136,6763675            | 0,00181964  | 0,0056167            |
| BB462665  | chr1       | 174204614  | 174228130 | Atp1a2        | 128,5886948            | 0,0002784   | 0,00335239           |
| AV300264  | chr5       | 101327171  | 101328121 | Agpat9        | 115,9448556            | 0,0005559   | 0,00403725           |
| BC018558  | chr3       | 10206458   | 10208558  | Fabp4         | 105,1310489            | 0,00084103  | 0,00446825           |
| NM_007817 | chr7       | 27904927   | 27918682  | Cyp2f2        | 90,60193768            | 0,00148232  | 0,00525054           |
| BC024581  | chr19      | 7632009    | 7660275   | Pla2g16       | 90,25250061            | 0,00022103  | 0,00332788           |
| NM_008288 | chr1       | 195047829  | 195068553 | Hsd11b1       | 83,31243849            | 0,00078034  | 0,00438425           |
| BC013486  | chr6       | 90412569   | 90425232  | Klf15         | 82,09799023            | 3,38E-05    | 0,00257407           |
| NM_013473 | chr14      | 34899174   | 34913757  | Anxa8         | 78,88833043            | 0,00012747  | 0,00309278           |
| BE199876  | chr2       | 136340642  | 136341256 | BC034902      | 77,4025934             | 0,00280214  | 0,00686451           |
| BC006732  | chr11      | 105795017  | 105799156 | Cyb561        | 77,0679975             | 0,00026607  | 0,0033347            |
| BF580962  | chr14      | 37915325   | 37923272  | 2610528A11Rik | 74,18008418            | 0,00027105  | 0,00334427           |
| AF244979  | chr19      | 7671141    | 7681668   | Lgals12       | 71,18715303            | 0,00160975  | 0,00534493           |
| NM_021282 | chr7       | 147949637  | 147960880 | Cyp2e1        | 69,86073906            | 0,00021697  | 0,00330638           |
| NM_010719 | chr7       | 26164545   | 26174243  | Lipe          | 69,77604883            | 0,00135909  | 0,0051197            |
| BC013271  | chr14      | 34899210   | 34913195  | Anxa8         | 66,60368062            | 4,11E-05    | 0,00273743           |
| NM_007606 | chr3       | 14863519   | 14872536  | Car3          | 65,57550011            | 0,00091792  | 0,00453233           |
| AK002700  | chr7       | 133816383  | 133819927 | Sult1a1       | 59,54650795            | 0,00063692  | 0,00415559           |
| BC024580  | chr15      | 31511592   | 31519878  | Cmb1          | 58,93611264            | 0,00015007  | 0,00317481           |
| NM_009150 | chr3       | 94736987   | 94748680  | Selenbp1      | 56,87725758            | 0,00167483  | 0,00543469           |
| AV006463  | chr11      | 83560500   | 83566146  | 1100001G20Rik | 55,71214663            | 0,00057773  | 0,0040998            |
| AK003207  | chr7       | 148641121  | 148645986 | Pnpla2        | 55,6174232             | 0,0006114   | 0,00410983           |
| BC006692  | chr8       | 47620210   | 47621400  | Acsl1         | 53,87746251            | 0,00010572  | 0,00305957           |
| NM_008560 | chr18      | 68566554   | 68569573  | Mc2r          | 53,43988507            | 0,00030629  | 0,00346094           |
| BC019391  | chr15      | 99547989   | 99555439  | Gpd1          | 53,23193114            | 4,92E-05    | 0,00292118           |
| BB404920  | chr19      | 7653432    | 7660277   | Pla2g16       | 52,81002796            | 0,00076389  | 0,00436395           |
| AV370830  | chr7       | 31603369   | 31608794  | Ffar2         | 52,69758708            | 0,00022193  | 0,00332788           |
| AI265463  | chr2       | 1729840395 | 172984773 | Pck1          | 50,26387527            | 0,00517929  | 0,00934898           |
| NM_023061 | chr9       | 43942743   | 43950810  | Mcam          | 49,29741182            | 0,00315761  | 0,00718159           |
| BC003967  | chr10      | 59809648   | 59835436  | 4632428N05Rik | 48,38322397            | 0,00111717  | 0,00480623           |
| AK002443  | chr7       | 106302170  | 106331225 | Dgat2         | 48,01505749            | 0,00285265  | 0,00692389           |
| BC019882  | chr9       | 119250617  | 119259285 | Acaa1b        | 45,9140885             | 0,0014521   | 0,00522274           |
| AA261399  | chr8       | 3671184    | 3672323   | 2400009B08Rik | 44,02084703            | 0,00037836  | 0,00368754           |
| NM_019414 | chr3       | 94736992   | 94748680  | Selenbp1      | 43,82144037            | 0,00110257  | 0,00478846           |
| BB009113  | chr5       | 124326747  | 124328014 | Gpr81         | 41,69420572            | 0,00038295  | 0,00370409           |
| BB373192  | chr11      | 76511155   | 76512166  | Tusc5         | 39,91779153            | 0,00264757  | 0,00667347           |
| BC026527  | chr12      | 113727679  | 113737328 | A530016L24Rik | 39,78464994            | 9,56E-05    | 0,00305957           |
| BE457727  | chr1       | 51521808   | 51525591  | Obfc2a        | 39,60182468            | 7,95E-05    | 0,00305957           |
| BI328146  | chr6       | 48519694   | 48522701  | Rarres2       | 38,1756284             | 4,85E-06    | 0,00137691           |
| AV332575  | chr14      | 41807024   | 41807279  | 5730469M10Rik | 37,94965855            | 0,0013046   | 0,0050565            |
| NM_011994 | chr15      | 90979245   | 91022230  | Abcd2         | 37,69888633            | 0,00107883  | 0,00474705           |
| AI845177  | chr1       | 174201840  | 174204135 | Atp1a2        | 37,33158868            | 0,00168086  | 0,00543469           |
| NM_009127 | chr19      | 44468944   | 44482206  | Scd1          | 35,63208501            | 3,73E-05    | 0,00270054           |
| BC026584  | chr1       | 9538160    | 9567012   | Adhfe1        | 35,51323794            | 6,47E-05    | 0,00294864           |
| NM_054098 | chr5       | 7960468    | 7982213   | Steap4        | 35,46404025            | 0,00034438  | 0,00358663           |
| AK008119  | chr3       | 116265888  | 116273980 | Lrrc39        | 33,45105947            | 0,00083246  | 0,00446825           |
| BB098407  | chr6       | 29908682   | 29909681  | Fam40b        | 33,29757022            | 3,54E-06    | 0,00128077           |
| AV012073  | chr6       | 48519696   | 48520339  | Rarres2       | 32,74323589            | 0,00017475  | 0,0032003            |
| AK010233  | chr1       | 40911813   | 40913734  | Tmem182       | 31,92013836            | 0,00076354  | 0,00436395           |
| C80506    | chr3       | 127572609  | 127573146 | 5730508B09Rik | 31,78457736            | 0,00239686  | 0,00634729           |
| NM_013462 | chr8       | 28337270   | 28338916  | Adrb3         | 31,66462305            | 0,00156671  | 0,00527297           |
| AF309644  | chr5       | 110703306  | 110715203 | Pxmp2         | 31,08119354            | 0,0008042   | 0,00442665           |
| BC025807  | chr1       | 174204246  | 174214950 | Atp1a2        | 30,57106697            | 0,00105322  | 0,00470106           |
| NM_017370 | chr8       | 112099028  | 112103064 | Hp            | 30,4156093             | 0,0002061   | 0,00326825           |
| AF078667  | chr19      | 40369435   | 40525877  | Sorbs1        | 30,20164027            | 0,00025018  | 0,0033347            |
| BM935811  | chr2       | 71625014   | 71696483  | Itga6         | 29,8984751             | 0,00020918  | 0,00327926           |
| AK004893  | chr14      | 31699687   | 31715136  | Itih4         | 29,83357576            | 0,00216676  | 0,00609077           |
| NM_007446 | chr3       | 113258869  | 113277683 | Amy1          | 29,08916541            | 0,00238133  | 0,00634332           |
| NM_032400 | chr3       | 59885782   | 59891486  | Sucnr1        | 28,69654212            | 0,00056798  | 0,00407723           |
| NM_008797 | chr19      | 4594321    | 4621753   | Pcx           | 28,52539581            | 0,00018565  | 0,00322705           |

|           |       |           |           |                 |             |            |            |
|-----------|-------|-----------|-----------|-----------------|-------------|------------|------------|
| BI411560  | chr6  | 88674717  | 88778354  | Mgll            | 28,06353805 | 0,00083523 | 0,00446825 |
| AF037370  | chr7  | 30969210  | 30971050  | Cox7a1          | 27,7163428  | 0,00204671 | 0,00595768 |
| AF288379  | chr6  | 129993749 | 130181688 | Klra20          | 26,85167163 | 0,00200946 | 0,00590219 |
| BC013479  | chr8  | 95780134  | 95803641  | Ces1f           | 26,71466461 | 4,23E-05   | 0,00274244 |
| AV025152  | chr19 | 38171982  | 38188753  | Gpr120          | 26,20445139 | 0,00041925 | 0,00382172 |
| NM_010022 | chr3  | 116216033 | 116252897 | Dbt             | 26,18928922 | 0,00059608 | 0,00410983 |
| NM_027853 | chr10 | 128395327 | 128398092 | Mettl7b         | 25,87021251 | 8,35E-06   | 0,0018591  |
| NM_030701 | chr5  | 124313582 | 124315506 | Niacr1          | 25,07138863 | 0,00095084 | 0,00456813 |
| BC005644  | chr15 | 78229985  | 78236833  | Tst             | 24,94484846 | 0,00027866 | 0,00335239 |
| NM_018825 | chr5  | 136694018 | 136720741 | Sh2b2           | 24,57858574 | 0,00042074 | 0,00382172 |
| AK017688  | chr14 | 41807024  | 41827086  | 5730469M10Rik   | 24,5544908  | 0,00015163 | 0,00318131 |
| BC021490  | chr13 | 60818038  | 60864547  | Dapk1           | 23,72695403 | 0,00131271 | 0,00507668 |
| BB197269  | chr15 | 90977785  | 90979279  | Abcd2           | 23,26847894 | 1,13E-05   | 0,00204316 |
| NM_031180 | chr5  | 65739624  | 65775243  | Klb             | 22,89483083 | 0,00491869 | 0,00907472 |
| BB667823  | chr18 | 21119972  | 21142512  | Rnf125          | 22,68080593 | 0,00051095 | 0,00394798 |
| BB149729  | chr18 | 68501371  | 68502099  | A030001D16Rik   | 22,6665042  | 0,00077072 | 0,00436395 |
| AK002562  | chr10 | 79792889  | 79799185  | Reep6           | 22,40913413 | 0,00104917 | 0,00470106 |
| AI506429  | chr1  | 51524285  | 51525001  |                 | 22,04668745 | 0,00139555 | 0,00514068 |
| NM_013681 | chr6  | 115084919 | 115225275 | Syn2            | 21,96485393 | 0,0015353  | 0,00527283 |
| BC011118  | chr7  | 35904321  | 35906945  | Cebpα           | 21,93533752 | 0,00108197 | 0,00475125 |
| AI391218  | chr11 | 19620238  | 19621578  | Glul            | 21,9069996  | 0,00140304 | 0,0051508  |
| NM_011016 | chr4  | 63023503  | 63026912  | Orm2            | 21,89030271 | 0,00170471 | 0,0054518  |
| NM_026633 | chr17 | 26000642  | 26005709  | Fam195a         | 21,70273562 | 0,00015558 | 0,00319851 |
| NM_019513 | chrX  | 160416896 | 160452931 | Car5b           | 21,44255625 | 0,00085689 | 0,00447452 |
| NM_021340 | chr14 | 37850675  | 37862150  | Rgr             | 21,43468038 | 0,00018388 | 0,00322705 |
| NM_024406 | chr3  | 10204341  | 10208559  | Fabp4           | 21,43014936 | 0,00046886 | 0,00387701 |
| AK017758  | chr3  | 127572600 | 127599211 | 5730508B09Rik   | 21,26995388 | 0,00319124 | 0,00718159 |
| AF199491  | chr3  | 51028876  | 51055566  | Ccrn4l          | 20,62361026 | 0,00138501 | 0,00512992 |
| BB222714  | chr12 | 113737606 | 113738140 | A530016L24Rik   | 20,61267733 | 0,00261062 | 0,00661103 |
| BE132973  | chrX  | 160414773 | 160416656 | Car5b           | 19,80132409 | 0,00037361 | 0,00368458 |
| BB737680  | chr19 | 40369260  | 40369607  | Sorbs1          | 19,7318593  | 0,00052076 | 0,00396887 |
| BB072896  | chr6  | 21721390  | 21802512  | Tspan12         | 19,36205263 | 0,0055412  | 0,00967288 |
| BC010758  | chr11 | 120590410 | 120593295 | Cbr2            | 19,35641673 | 0,00010758 | 0,00305957 |
| BB192951  | chr6  | 35217952  | 35218617  | Slc13a4         | 19,0541058  | 0,00138226 | 0,00512992 |
| BC005555  | chr15 | 10106992  | 10259130  | Prlr            | 19,00391824 | 0,00136271 | 0,00512401 |
| AK008086  | chr15 | 76527155  | 76530105  | Gpt             | 18,99720145 | 0,00040572 | 0,00379856 |
| C85657    |       | NA        | NA        | A130040M12Rik   | 18,98627527 | 5,43E-05   | 0,00292118 |
| NM_008398 | chr10 | 128370873 | 128395338 | Itga7           | 18,95386287 | 0,00039737 | 0,0037847  |
| BC003222  | chr11 | 120353154 | 120360484 | Slc25a10        | 18,42554005 | 0,00060456 | 0,00410983 |
| AI315015  | chr8  | 95689969  | 95716979  | Ces1d           | 18,3962525  | 0,00088173 | 0,00452108 |
| NM_133898 | chr5  | 151374218 | 151379566 | N4bp2l1         | 18,3266349  | 0,00030772 | 0,00346094 |
| NM_018784 | chr16 | 58469546  | 58523576  | St3gal6         | 18,2937635  | 0,00257677 | 0,00657129 |
| BC028550  | chr13 | 23622912  | 23623388  | Hist1h4h        | 18,24956284 | 0,00156006 | 0,00527283 |
| NM_008521 | chr11 | 50049962  | 50052118  | Ltc4s           | 18,20692022 | 0,00033274 | 0,00358582 |
| BB254922  | chr1  | 145495417 | 145495979 | B3galt2         | 18,17218509 | 0,00105187 | 0,00470106 |
| NM_013839 | chr2  | 91024218  | 91035273  | Nr1h3           | 18,15386715 | 0,00084279 | 0,00446825 |
| BE852759  | chr11 | 115761362 | 115767582 | 2210020M01Rik   | 18,12997462 | 0,00105068 | 0,00470106 |
| AK010891  | chr2  | 26448576  | 26459937  | Agpat2          | 18,04096995 | 0,00018471 | 0,00322705 |
| BB144704  | chr4  | 53043656  | 53172767  | Abca1           | 17,89091167 | 0,00018251 | 0,00322705 |
| AJ132394  | chr3  | 94181353  | 94202194  | Rorc            | 17,79765178 | 0,00190912 | 0,00574242 |
| BF682848  | chr14 | 9128784   | 9129647   | Fam107a         | 17,73576925 | 9,28E-05   | 0,00305957 |
| AF031467  | chr7  | 52830803  | 52844717  | Bcat2           | 17,7123042  | 0,00015602 | 0,00319851 |
| BM234652  | chr7  | 112400397 | 112402780 | Ero1l           | 16,96288905 | 0,00033871 | 0,00358663 |
| AK010208  | chr15 | 76875705  | 76887537  | Apol6           | 16,7989016  | 0,00061004 | 0,00410983 |
| AK004847  | chrX  | 136145158 | 136207908 | Rnf128          | 16,76081039 | 0,00304225 | 0,00707307 |
| BQ176684  | chr19 | 40366529  | 40369173  | Sorbs1          | 16,55821211 | 0,00031182 | 0,00346349 |
| AI593746  | chr1  | 158790542 | 158791209 | Angptl1         | 16,48160688 | 0,00091101 | 0,00453233 |
| AB041613  | chr12 | 88488114  | 88505274  | Gstz1           | 16,27612094 | 0,00046265 | 0,00387701 |
| BB535044  | chr14 | 32042866  | 32043536  | Sema3g          | 15,92338332 | 0,00069062 | 0,00422116 |
| BB021589  | chr10 | 40369064  | 40369735  | Ddo             | 15,75464127 | 0,00256376 | 0,00654965 |
| NM_023137 | chr17 | 37330506  | 37333045  | Ubd             | 15,70993166 | 0,0003029  | 0,00346094 |
| AW682368  | chr8  | 67218472  | 67373665  | Klhl2, LOC1005C | 15,47529493 | 0,00014741 | 0,00316942 |
| BB224405  | chr5  | 125757458 | 125757736 | Scarb1          | 15,4384927  | 0,00361318 | 0,0077077  |
| BQ032773  | chr19 | 25485824  | 25508983  | Kank1           | 15,40476747 | 0,00360215 | 0,00770268 |
| AV270888  | chr7  | 121680221 | 121681694 | Pde3b           | 15,37681709 | 2,80E-05   | 0,00243313 |
| C78565    | chr6  | 71163935  | 71164525  | Smyd1           | 15,30276026 | 0,00203562 | 0,00593921 |
| NM_011303 | chr4  | 144482695 | 144517545 | Dhrs3           | 14,88533722 | 0,00020261 | 0,00326825 |
| BF450030  | chr5  | 31338408  | 31340479  | Slc5a6          | 14,73229208 | 0,00113626 | 0,00484102 |
| BE989731  | chr5  | 34344251  | 34345726  | Nat8l           | 14,55471818 | 0,00327294 | 0,0072857  |
| M22958    | chr15 | 10107479  | 10275537  | Prlr            | 14,52755488 | 0,00082356 | 0,00446825 |
| BC021776  | chr9  | 46041142  | 46042812  | Apoc3           | 14,29699458 | 0,00250995 | 0,0064624  |
| BB138434  |       | NA        | NA        | Scarb1          | 14,2065565  | 0,0013868  | 0,00512992 |
| NM_019417 | chr11 | 53868429  | 53882470  | Pdlim4          | 14,13970386 | 0,00299045 | 0,0070317  |
| BC026867  | chr10 | 94038001  | 94051064  | Tmcc3           | 13,90850066 | 0,0005344  | 0,00400832 |
| NM_031401 | chr3  | 97493743  | 97503753  | Pde4dip         | 13,81161386 | 0,00150953 | 0,00527107 |
| BB223872  | chr19 | 8922578   | 8923156   | Bscl2           | 13,79993915 | 0,00275922 | 0,00680483 |
| AJ310638  | chr2  | 150408815 | 150434284 | 2310001A20Rik   | 13,53755224 | 4,61E-06   | 0,00137691 |
| NM_016741 | chr5  | 125757454 | 125821470 | Scarb1          | 13,50343929 | 5,19E-05   | 0,00292118 |
| AK016444  | chr19 | 37332920  | 37338379  | 4931408D14Rik   | 13,35992497 | 0,0034326  | 0,00750644 |
| NM_023737 | chr16 | 21761359  | 21787879  | Eh3hadh         | 13,31905666 | 0,00136431 | 0,00512561 |
| AV274826  | chr13 | 47342319  | 47343363  | Rnf144b         | 13,20886866 | 0,00112788 | 0,00482125 |
| AV256906  | chr3  | 121238454 | 121239124 | A530020G20Rik   | 13,20387975 | 0,00463462 | 0,0087628  |

|           |       |           |           |                 |             |            |            |
|-----------|-------|-----------|-----------|-----------------|-------------|------------|------------|
| BI133691  | chr8  | 123132501 | 123158283 | 1190005106Rik   | 13,18376019 | 0,00084919 | 0,00446825 |
| BC022593  | chr5  | 123526332 | 123567433 | Tmem120b        | 13,16987731 | 0,00137338 | 0,00512992 |
| NM_011068 | chr7  | 86880842  | 86887966  | Pex11a          | 13,14812343 | 0,00109159 | 0,00476387 |
| BC011229  | chr1  | 164759691 | 164796741 | Fmo1            | 13,01384166 | 0,00494034 | 0,00909459 |
| AK018763  | chr8  | 127080486 | 127093728 | Agt             | 12,96742392 | 0,00083392 | 0,00446825 |
| NM_009166 | chr19 | 40368645  | 40588240  | Sorbs1          | 12,94358184 | 0,00404574 | 0,00813079 |
| NM_053115 | chr14 | 9058024   | 9091839   | Acox2           | 12,88490504 | 0,00075851 | 0,00436395 |
| NM_133249 | chr18 | 61457414  | 61560085  | Ppargc1b        | 12,87102461 | 0,00447252 | 0,00857958 |
| BM898679  | chr6  | 115231100 | 115232024 | Syn2            | 12,84005965 | 0,00082438 | 0,00446825 |
| NM_010664 | chr15 | 101858646 | 101862453 | Krt18           | 12,77264138 | 0,00127855 | 0,00502966 |
| NM_021719 | chr5  | 137443596 | 137451715 | Cldn15          | 12,5386055  | 0,00048092 | 0,00388445 |
| BE197945  | chr1  | 51345927  | 51359799  | Sdpr            | 12,49617797 | 0,00096411 | 0,00458346 |
| AI266795  | chr3  | 90314972  | 90316071  | S100a1          | 12,46844806 | 0,00058012 | 0,00410335 |
| NM_008484 | chr1  | 195128219 | 195170071 | Lamb3           | 12,44233198 | 0,00090928 | 0,00453233 |
| NM_054088 | chr15 | 83998257  | 84019944  | Pnpla3          | 12,43422771 | 0,00094297 | 0,00454531 |
| BG067678  | chr18 | 61451120  | 61451649  |                 | 12,14693143 | 0,00059045 | 0,00410983 |
| NM_021881 | chr17 | 10403043  | 10512719  | Qk              | 12,11531491 | 0,00055114 | 0,00403725 |
| AK007822  | chr6  | 90500805  | 90550197  | Aldh1l1, LOC10C | 11,95465011 | 0,00447891 | 0,00858377 |
| AV064339  | chr1  | 51358226  | 51358473  | Sdpr            | 11,92824591 | 0,00123065 | 0,00496258 |
| NM_023422 | chr13 | 23776082  | 23784357  | Hist1h2bc       | 11,85529782 | 0,00012363 | 0,00307567 |
| BB428573  | chr8  | 67218473  | 67218689  | Klhl2, LOC1005C | 11,77006188 | 0,00011097 | 0,00305957 |
| U41465    | chr16 | 23965135  | 23988721  | Bcl6            | 11,68965138 | 0,00173551 | 0,00550974 |
| NM_029796 | chr17 | 56259098  | 56261424  | Lrg1            | 11,67361914 | 0,00047045 | 0,00387701 |
| BC005590  | chr3  | 90314954  | 90318314  | S100a1          | 11,57656231 | 0,00241962 | 0,00637481 |
| AK005472  | chr5  | 91032109  | 91060635  | Rassf6          | 11,56184715 | 0,00244074 | 0,00640387 |
| BB508622  |       | NA        | NA        | Trib3           | 11,4822622  | 5,28E-05   | 0,00292118 |
| NM_013820 | chr6  | 82675023  | 82724453  | Hk2             | 11,44459893 | 0,0019059  | 0,00574242 |
| AW554594  | chr15 | 10259973  | 10265585  | Prlr            | 11,4250217  | 0,00532154 | 0,00945679 |
| BB479063  | chr14 | 35339884  | 35340555  | Ldb3            | 11,40018238 | 0,00061794 | 0,00410983 |
| BC012955  | chr2  | 152163160 | 152169768 | Trib3           | 11,39923418 | 0,00022528 | 0,00332788 |
| NM_020568 | chr17 | 56240013  | 56249226  | Plin4           | 11,34964289 | 0,00106631 | 0,00471587 |
| BE632137  | chr6  | 119305273 | 119311927 | Adipor2         | 11,21159787 | 0,00249687 | 0,0064624  |
| AK014605  | chr1  | 182095368 | 182126130 | Adck3           | 11,20045162 | 0,00023551 | 0,0033347  |
| BB357585  | chr15 | 8584125   | 8660740   | Slc1a3          | 11,17637168 | 0,0028754  | 0,00694541 |
| BB114202  | chr3  | 121237089 | 121237766 | A530020G20Rik   | 11,1282513  | 0,00134261 | 0,00510593 |
| BB007236  | chr18 | 12121375  | 12122059  | 6030446N20Rik   | 11,12647734 | 0,00508355 | 0,0092492  |
| BE634869  |       | NA        | NA        | A130040M12Rik   | 11,11248834 | 0,0047563  | 0,00889987 |
| NM_017388 | chr14 | 44680551  | 44681022  | BC151093, Ear1  | 11,0212809  | 0,00235922 | 0,00632865 |
| BM122014  | chr9  | 21639946  | 21641790  | Gm6484          | 10,96945542 | 0,00010003 | 0,00305957 |
| AV328143  | chr12 | 40759878  | 40761746  | Arl4a           | 10,91828987 | 0,00189619 | 0,00573878 |
| AW413978  | chr17 | 31194642  | 31253087  | Abcg1           | 10,84576567 | 0,00246703 | 0,00642461 |
| NM_019811 | chr2  | 155343787 | 155388482 | Accs2           | 10,79555119 | 0,00062198 | 0,00411742 |
| BC003717  | chr15 | 76332444  | 76342397  | Dgat1           | 10,67234275 | 9,52E-05   | 0,00305957 |
| AF069954  | chr19 | 8913857   | 8923157   | Bsc12           | 10,62683444 | 3,15E-05   | 0,00252722 |
| NM_134042 | chr12 | 85771666  | 85791974  | Aldh6a1         | 10,5518569  | 0,00026141 | 0,0033347  |
| BB259710  | chr19 | 40408516  | 40409189  | Sorbs1          | 10,50799126 | 0,00148337 | 0,00525054 |
| NM_015763 | chr12 | 16542756  | 16596575  | Lpin1           | 10,44810938 | 0,0005925  | 0,00410983 |
| BB066186  | chr9  | 40105460  | 40114506  | Gramd1b         | 10,40994109 | 0,00080215 | 0,00442662 |
| BC013477  | chr3  | 137940606 | 137953658 | Adh1            | 10,38522091 | 0,00035823 | 0,00361968 |
| BC027089  | chr11 | 35582985  | 35600442  | Pank3           | 10,33369999 | 0,00027263 | 0,0033496  |
| AU018141  |       | NA        | NA        | 3930401B19Rik,  | 10,32983282 | 0,00046931 | 0,00387701 |
| BI647951  | chr17 | 87231237  | 87232750  | Epas1           | 10,30637438 | 0,00367561 | 0,00777151 |
| NM_013514 | chr14 | 71003425  | 71029961  | Epb4.9          | 10,20344905 | 0,00137034 | 0,00512992 |
| AK007410  | chr13 | 51942046  | 51943837  | Gadd45g         | 10,18606554 | 0,00229318 | 0,00624406 |
| AK014526  | chr12 | 16543848  | 16617772  | Lpin1           | 10,03678283 | 0,00146238 | 0,00522449 |
| BC025819  | chr19 | 44079511  | 44103737  | Cyp2c44         | 9,981800016 | 0,00443457 | 0,00853315 |
| BB279185  | chr17 | 23873152  | 23877347  | Ppq4            | 9,938237367 | 0,00053663 | 0,00401129 |
| BB521491  | chr2  | 163292026 | 163298365 | Fitm2           | 9,904643165 | 0,0004335  | 0,0038344  |
| BB429201  | chr15 | 10265628  | 10266766  | Prlr            | 9,897985989 | 0,0014485  | 0,00522274 |
| NM_009760 | chr14 | 45216328  | 45218004  | Bnip3           | 9,881328372 | 0,00045809 | 0,00387057 |
| NM_019738 | chr7  | 133766761 | 133768989 | Nupr1           | 9,818413999 | 0,00121064 | 0,0049334  |
| BB711990  | chr10 | 94050767  | 94052843  | Tmcc3           | 9,736747976 | 0,00427557 | 0,00840218 |
| BB771888  | chr10 | 94052764  | 94053701  | Tmcc3           | 9,707333115 | 0,00162336 | 0,00536547 |
| BC013080  | chr12 | 25257148  | 25302256  | Grhl1           | 9,706155679 | 0,00155034 | 0,00527283 |
| AI467657  | chr9  | 48459907  | 48460814  |                 | 9,677135079 | 0,0017305  | 0,00550189 |
| AK014175  | chr4  | 35138530  | 35166166  | 3110043O21Rik   | 9,643387359 | 0,0007646  | 0,00436395 |
| BB253137  | chr1  | 121312039 | 121335316 | Inhbb           | 9,584312842 | 0,00138439 | 0,00512992 |
| AV247637  | chr3  | 108087008 | 108164448 | Sort1           | 9,412709041 | 0,00011174 | 0,00305957 |
| BI247584  | chr3  | 88897510  | 88905836  | Fdps            | 9,360431259 | 0,00178327 | 0,00556381 |
| NM_025655 | chr11 | 76718043  | 76730084  | Tmigd1          | 9,248760298 | 0,00082021 | 0,00446825 |
| BC024909  | chr5  | 36039831  | 36064252  | Sh3tc1          | 9,173072232 | 0,00077208 | 0,00436395 |
| AI256077  | chr13 | 41859521  | 41942985  | 9530008L14Rik   | 9,147801115 | 0,00074722 | 0,00432122 |
| BC025528  | chr3  | 40754720  | 40781719  | Larp1b          | 9,09964334  | 0,00297698 | 0,00702665 |
| AK017604  | chr5  | 136699628 | 136720732 | Sh2b2           | 9,062976852 | 0,00054548 | 0,00402962 |
| BC008266  | chr3  | 106288542 | 106304062 | Dennd2d         | 9,050390237 | 0,00215906 | 0,00608487 |
| NM_053200 | chr8  | 95689966  | 95721702  | Ces1d           | 8,993514471 | 0,00060088 | 0,00410983 |
| BE952741  | chr14 | 24125831  | 24127542  | Kcnma1          | 8,935385668 | 0,00312364 | 0,00714374 |
| BM120193  | chr14 | 70977905  | 70980975  | Nudt18          | 8,928451598 | 0,00035189 | 0,00358878 |
| BC026437  | chr1  | 52901889  | 52977706  | Hibch           | 8,926749859 | 0,00242271 | 0,00637481 |
| BC021951  | chr19 | 4496787   | 4498583   | 2010003K11Rik   | 8,88769926  | 0,00145134 | 0,00522274 |
| AK006387  | chr13 | 62915245  | 62916281  | Me1             | 8,885050647 | 0,00016584 | 0,0032003  |
| AW049906  | chr8  | 15032367  | 15033333  | Kbtbd11         | 8,855384807 | 0,00098805 | 0,00460391 |

|           |       |           |           |                  |             |            |            |
|-----------|-------|-----------|-----------|------------------|-------------|------------|------------|
| BB745929  | chr6  | 58885395  | 58896132  | Fam13a           | 8,84694896  | 0,00031    | 0,00346094 |
| NM_028803 | chr16 | 70314380  | 70569959  | Gbe1             | 8,77883805  | 0,00118496 | 0,00489188 |
| BB284358  | chr12 | 55279967  | 55304847  | Egln3            | 8,739162327 | 0,00142738 | 0,00519821 |
| AF440692  | chr9  | 103112823 | 103130399 | Trf              | 8,736134089 | 0,00079203 | 0,00441565 |
| BB775176  | chr6  | 72548468  | 72558409  | Retsat           | 8,728537833 | 0,00092263 | 0,00453527 |
| BB764550  | chr16 | 76287636  | 76289654  | Nrip1            | 8,727116161 | 0,00034405 | 0,00358663 |
| BC014769  | chr19 | 6062820   | 6067842   | Tm7sf2           | 8,725452796 | 0,00308833 | 0,00711546 |
| AV069499  | chr5  | 136211355 | 136220081 | Tmem120a         | 8,718409693 | 0,00155125 | 0,00527283 |
| NM_026125 | chr4  | 155336421 | 155340735 | Fam132a          | 8,701203741 | 0,00056437 | 0,00407723 |
| NM_011146 | chr6  | 115372083 | 115440417 | Pparg            | 8,650838646 | 0,00017206 | 0,00320003 |
| AI790538  | chr12 | 38132504  | 38308789  | Tmem195          | 8,639692706 | 0,00278812 | 0,00684886 |
| NM_013915 | chr1  | 179375491 | 179380895 | Zfp238           | 8,630445305 | 7,34E-05   | 0,00305277 |
| NM_133232 | chr2  | 11393056  | 11423702  | Pfkfb3           | 8,625720685 | 0,00059017 | 0,00410983 |
| C86690    | chr4  | 62167018  | 62168109  |                  | 8,620789508 | 0,00279552 | 0,00685929 |
| BC024657  | chr7  | 20263442  | 20266770  | Apoc4            | 8,617981491 | 0,0020386  | 0,00594205 |
| BC016251  | chr10 | 87951126  | 87966663  | Chpt1            | 8,61126389  | 0,00091823 | 0,00453233 |
| NM_009310 | chr7  | 20490400  | 20504230  | Pvr              | 8,541384856 | 0,00022764 | 0,00333347 |
| BC006690  | chr10 | 40349816  | 40369455  | Ddo              | 8,40568271  | 0,00480052 | 0,00894793 |
| BB408123  | chr14 | 79688553  | 79688817  | 1190002H23Rik    | 8,397151403 | 7,17E-05   | 0,00304555 |
| AK019674  | chr6  | 94893825  | 94901539  | 4930511E03Rik    | 8,370651998 | 7,80E-05   | 0,00305957 |
| BB239429  | chr10 | 33845873  | 33847356  | Fam26f           | 8,369259611 | 0,00246779 | 0,00642461 |
| BC019757  | chr13 | 22132504  | 22133231  | Hist1h4a, Hist1h | 8,351469081 | 0,00110895 | 0,0047999  |
| L38990    | chr11 | 5800825   | 5849602   | Gck              | 8,344351895 | 0,00043498 | 0,00383854 |
| NM_008819 | chr11 | 59784319  | 59845307  | Pemt             | 8,284502135 | 0,00217894 | 0,00610837 |
| BE446953  | chr9  | 75158139  | 75162153  | LOC100503060     | 8,270101294 | 0,00522237 | 0,00938145 |
| NM_007533 | chr7  | 26414869  | 26444000  | Bckdha           | 8,24551726  | 0,00115505 | 0,00487049 |
| BC010822  | chr2  | 92215408  | 92221377  | Pex16            | 8,226877719 | 0,00354011 | 0,00761501 |
| AK017403  | chr10 | 61178049  | 61201395  | Aifm2            | 8,190264252 | 0,00282543 | 0,00687812 |
| NM_026438 | chr10 | 61111331  | 61136916  | Ppa1             | 8,161362368 | 0,00019248 | 0,0032401  |
| BC002073  | chr11 | 83401388  | 83406599  | Ccl6             | 8,118031849 | 0,00033719 | 0,00358663 |
| NM_027828 | chr12 | 31758832  | 31764809  | Fam110c          | 8,095863692 | 0,00084982 | 0,00446825 |
| AK005070  | chr16 | 17925316  | 17928273  | Slc25a1          | 8,086245473 | 0,00044002 | 0,00383854 |
| NM_016900 | chr6  | 17231231  | 17239117  | Cav2             | 8,00022181  | 0,00147723 | 0,00524451 |
| BG069603  | chr5  | 105206651 | 105208417 | Txlng            | 7,952095043 | 0,00309235 | 0,00711715 |
| NM_010285 | chr2  | 157155232 | 157159528 | Ghrh             | 7,909162851 | 0,00086582 | 0,00449255 |
| BG074607  | chr6  | 119303167 | 119305419 | Adipor2          | 7,888412528 | 0,00047761 | 0,00388445 |
| BC010564  | chr3  | 96049180  | 96050348  | Hist2h2aa1, Hist | 7,886171036 | 0,0029705  | 0,00702662 |
| BQ174973  | chr9  | 48462388  | 48463099  | Zbtb16           | 7,843893785 | 0,0021843  | 0,00611238 |
| BB795106  | chr11 | 35601432  | 35604787  | Pank3            | 7,821932032 | 0,00195856 | 0,00582205 |
| NM_013867 | chr3  | 122122674 | 122233109 | Bcar3            | 7,802465105 | 0,00067305 | 0,00422116 |
| BC004801  | chr13 | 8884922   | 8891697   | Idi1             | 7,792736313 | 0,00474805 | 0,00889594 |
| BE133651  | chr19 | 44277761  | 44317134  | Scd3             | 7,772210635 | 0,00203434 | 0,00593921 |
| AA419994  | chr9  | 48459901  | 48473433  | Zbtb16           | 7,768117376 | 0,00086307 | 0,00448363 |
| AW060288  | chr17 | 10403046  | 10512245  | Qk               | 7,736896637 | 0,00035202 | 0,00358878 |
| BC006668  | chr2  | 30255995  | 30271042  | Crat             | 7,733706424 | 0,00265989 | 0,00668414 |
| BI729743  | chr9  | 40100839  | 40101783  | Gramd1b          | 7,681696687 | 0,00110368 | 0,00478851 |
| AI644670  | chr5  | 34348087  | 34348563  | Nat8l            | 7,651512721 | 0,00322397 | 0,00723227 |
| NM_009676 | chr1  | 58086812  | 58163257  | Aox1             | 7,65119451  | 0,00573542 | 0,00986883 |
| BC011293  | chr4  | 149118144 | 149148327 | Slc25a33         | 7,581876727 | 0,00067447 | 0,00422116 |
| BB747681  | chr8  | 42076566  | 42140150  | Mtus1            | 7,579354575 | 0,00497869 | 0,00912725 |
| AV016374  | chr8  | 25547651  | 25548445  | 1810011010Rik    | 7,415299687 | 6,90E-05   | 0,00299762 |
| BB006809  | chr8  | 4493198   | 4525753   | Lass4            | 7,414220388 | 0,00021614 | 0,00330528 |
| AW552116  | chr7  | 104607088 | 104608065 | Kctd14           | 7,4044881   | 0,00374792 | 0,00782998 |
| AK017272  | chr8  | 71404412  | 71431347  | Lpl              | 7,386751273 | 0,00104761 | 0,00470106 |
| AK013740  | chrX  | 132528375 | 132530030 | 2900062L11Rik    | 7,33422741  | 0,0002707  | 0,00334427 |
| NM_008713 | chr5  | 23870629  | 23890295  | Nos3             | 7,315061532 | 0,00024145 | 0,00333347 |
| M25487    | chr13 | 21879395  | 21881081  | Hist1h2bp        | 7,310778287 | 0,00308401 | 0,00711305 |
| NM_008735 | chr16 | 76289927  | 76373190  | Nrip1            | 7,294807966 | 0,00317513 | 0,00718159 |
| BC004754  | chr7  | 148578109 | 148588866 | Taldo1           | 7,291496791 | 0,00026312 | 0,00333347 |
| BB372866  | chr19 | 40421164  | 40422034  | Sorbs1           | 7,288566014 | 0,00433939 | 0,00844953 |
| NM_026322 | chr14 | 64741456  | 65059875  | Msra             | 7,232803714 | 0,00268288 | 0,00670796 |
| BE951033  | chr11 | 77992191  | 77994674  | Tlcd1            | 7,208379666 | 0,00583559 | 0,00997008 |
| BC026496  | chr11 | 109886949 | 109931163 | Abca8a           | 7,201238256 | 0,00201702 | 0,00591488 |
| BC011081  | chr13 | 62914371  | 62916875  | Me1              | 7,196298349 | 0,00106151 | 0,00470833 |
| NM_053122 | chr12 | 41750915  | 43056575  | Immp2l           | 7,169437836 | 0,00214693 | 0,00606249 |
| BM234253  | chr13 | 34271039  | 34273976  | Slc22a23         | 7,14374211  | 0,00063344 | 0,00415559 |
| NM_011079 | chr5  | 130339308 | 130354960 | Phkg1            | 7,135032494 | 0,00375579 | 0,00782998 |
| AV154597  | chr16 | 23985681  | 23987388  | 2900064B18Rik    | 7,107119711 | 0,00507456 | 0,00924059 |
| NM_009921 | chr9  | 109749892 | 109752131 | Camp             | 7,100841479 | 0,001513   | 0,00527107 |
| NM_133836 | chr2  | 11627036  | 11655612  | Il15ra           | 7,097593749 | 0,0031866  | 0,00718159 |
| AV342060  | chr9  | 107251386 | 107252018 | 6430571L13Rik    | 7,064708333 | 0,00565904 | 0,00978428 |
| BE691662  | chr3  | 96051785  | 96052427  | Hist2h3c1        | 7,046368868 | 0,00014714 | 0,00316942 |
| BC017621  | chr15 | 88692615  | 88696156  | Pim3             | 7,024034836 | 0,00171907 | 0,00548016 |
| BB308792  | chr2  | 32588142  | 32588339  | 6330409D20Rik    | 7,023986149 | 0,00274881 | 0,00679144 |
| BB126309  | chr4  | 109325034 | 109325644 | 9630013D21Rik    | 7,002305472 | 0,00146962 | 0,0052316  |
| BB699957  | chr8  | 42075736  | 42077256  | Mtus1            | 6,962063632 | 0,00011232 | 0,00305957 |
| BB219343  | chr9  | 55068029  | 55068653  | Nrg4             | 6,937159233 | 0,00074872 | 0,00432122 |
| NM_025855 | chr10 | 29033346  | 29065757  | Echdc1           | 6,909038734 | 0,00060964 | 0,00410983 |
| BC011139  | chr11 | 5800825   | 5815138   | Gck              | 6,901021846 | 0,00042994 | 0,00382629 |
| BC021433  | chr10 | 87785545  | 87819820  | Dram1            | 6,89714836  | 0,00048298 | 0,00388445 |
| BB049138  | chr7  | 20488926  | 20506509  | Pvr              | 6,870737666 | 0,00085323 | 0,00447452 |
| NM_138953 | chr13 | 75844968  | 75909804  | Ell2             | 6,869618585 | 0,00233576 | 0,00630074 |

|           |       |           |           |               |              |            |            |
|-----------|-------|-----------|-----------|---------------|--------------|------------|------------|
| NM_033037 | chr18 | 46872858  | 46888156  | Cdo1          | 6,840135953  | 0,0012458  | 0,00498205 |
| AF127033  | chr11 | 120668011 | 120685090 | Fasn          | 6,836391413  | 0,00016943 | 0,0032003  |
| AK019319  | chr7  | 20281621  | 20282444  | Apoe          | 6,831843846  | 0,00041277 | 0,00381145 |
| BC011482  | chr10 | 127946801 | 127962971 | Esyt1         | 6,82133918   | 0,00010587 | 0,00305957 |
| AW047304  | chr9  | 83818766  | 84017847  | Bckdhh        | 6,761929618  | 0,00074777 | 0,00432122 |
| BC025146  | chr2  | 321110521 | 32115771  | Uck1          | 6,735032932  | 0,00305599 | 0,00709741 |
| AK014511  | chr9  | 65246294  | 65260512  | Rasl12        | 6,718247754  | 0,00120311 | 0,0049247  |
| BF180212  | chr10 | 87934948  | 87943609  | Chpt1         | 6,679221692  | 0,00032262 | 0,00352936 |
| AK018117  | chr17 | 59139040  | 59152745  | Nudt12        | 6,657935988  | 0,00010544 | 0,00305957 |
| NM_019686 | chr9  | 54392595  | 54408000  | Cib2          | 6,63014306   | 0,0018022  | 0,00559469 |
| AK005441  | chr8  | 67196912  | 67212589  | Sc4mol        | 6,577434606  | 6,50E-05   | 0,00294864 |
| BC016562  | chr8  | 25547885  | 25549407  | 1810011010Rik | 6,565500525  | 0,00203626 | 0,00593921 |
| BI713896  | chr3  | 89258462  | 89272931  | Pmvk          | 6,546142463  | 0,00174505 | 0,00552076 |
| BB214398  | chr3  | 121236636 | 121237332 | A530020G20Rik | 6,521234052  | 0,00034262 | 0,00358663 |
| AV210813  | chr11 | 72960610  | 72960942  | Itgae         | 6,482835655  | 0,00411665 | 0,00822005 |
| NM_011641 | chr16 | 25802001  | 25892175  | Trp63         | 6,478208941  | 0,00348094 | 0,00754378 |
| BC015270  | chr3  | 96050622  | 96051285  | Hist2h3c2-ps  | 6,45376032   | 0,00324156 | 0,00724554 |
| AV263881  | chr1  | 51527405  | 51528256  | Obfc2a        | 6,427732989  | 0,00303438 | 0,00706233 |
| NM_010322 | chr8  | 127386932 | 127413956 | Gnpat         | 6,427398845  | 0,00034368 | 0,00358663 |
| BC024684  | chr9  | 75234184  | 75257805  | Mapk6         | 6,410158367  | 0,00417335 | 0,00829893 |
| U49865    | chr6  | 130128699 | 130143149 | Klra3, Klra9  | 6,392631798  | 0,00427502 | 0,00840218 |
| BI730288  | chr11 | 30405991  | 30549407  | Acyp2         | 6,391324776  | 0,00302347 | 0,00704888 |
| BC018167  | chr11 | 115475488 | 115489579 | Slc25a19      | 6,385501811  | 0,00101247 | 0,00464421 |
| NM_021304 | chr5  | 31252444  | 31257461  | Abhd1         | 6,37924196   | 0,00190927 | 0,00574242 |
| BC005454  | chr4  | 40090297  | 40145583  | Aco1          | 6,376390567  | 2,61E-09   | 0,00113229 |
| NM_008871 | chr5  | 137537373 | 137548129 | Serpine1      | 6,361799922  | 0,00405291 | 0,00813391 |
| BC027438  | chr4  | 135521079 | 135524093 | Gale          | 6,321075295  | 0,00179208 | 0,00557676 |
| AK005271  | chr7  | 133967345 | 133973733 | Fam57b        | 6,315381994  | 0,00233119 | 0,00629624 |
| BC019462  | chr15 | 76551894  | 76554270  | C030006K11Rik | 6,305387349  | 5,52E-05   | 0,00292118 |
| AV101011  | chr7  | 121408119 | 121408829 | Ppsa1         | 6,257081953  | 0,00095671 | 0,00457829 |
| NM_009780 | chr17 | 34865324  | 34880828  | C4b           | 6,218255947  | 0,00041839 | 0,00382172 |
| BC003479  | chr11 | 60644132  | 60671650  | Dhrs7b        | 6,215368806  | 0,00026721 | 0,00333347 |
| X98848    | chrX  | 147069065 | 147078420 | Pfkfb1        | 6,209706149  | 0,00456521 | 0,0086769  |
| AV144145  | chrX  | 139731702 | 139732274 | Chrdl1        | 6,187728943  | 0,00121402 | 0,0049334  |
| NM_009029 | chr14 | 73595308  | 73725547  | Rb1           | 6,146542047  | 0,0003906  | 0,00376032 |
| BC025169  | chr2  | 119176964 | 119180062 | Chac1         | 6,144731619  | 0,00042206 | 0,00382172 |
| BC006901  | chr5  | 148690011 | 148706376 | Slc46a3       | 6,129545061  | 0,00077209 | 0,00436395 |
| BI556043  | chr2  | 30239631  | 30241039  | Fam73b        | 6,100193474  | 0,00413292 | 0,00824495 |
| AF425607  | chr9  | 21528047  | 21554360  | Ldlr          | 6,080626604  | 0,00040369 | 0,00379856 |
| AK004841  | chr11 | 74462377  | 74484349  | 1300001I01Rik | 6,070414374  | 1,44E-06   | 0,00089557 |
| AK005014  | chr2  | 172950246 | 172958706 | 1300015D01Rik | 6,064358322  | 0,00448677 | 0,00859173 |
| NM_026524 | chrX  | 10294608  | 10296823  | Mid1ip1       | 6,046603589  | 0,0002356  | 0,00333347 |
| U89924    | chr19 | 36807188  | 36811159  | Ppp1r3c       | 6,026373122  | 0,00116451 | 0,00487257 |
| BB206220  | chr15 | 88695878  | 88696154  | Pim3          | 5,988688114  | 0,00079402 | 0,00442106 |
| AV307311  | chr1  | 60540030  | 60545323  | LOC100504603, | 5,947609797  | 0,00205661 | 0,00597431 |
| BQ031255  | chr9  | 103966015 | 104029984 | Acad11        | 5,916442673  | 0,00040215 | 0,00379856 |
| NM_023644 | chr3  | 35858232  | 35899568  | Mccc1         | 5,88315481   | 0,00020619 | 0,00326825 |
| NM_030678 | chr7  | 52690370  | 52710861  | Gys1          | 5,870221739  | 0,0053647  | 0,00949425 |
| AJ311773  | chr5  | 92816914  | 92843648  | Art3          | 5,833755814  | 0,00061154 | 0,00410983 |
| BC018236  | chr4  | 62170201  | 62181096  | Alad          | 5,818652143  | 0,00011413 | 0,00305957 |
| NM_011844 | chr6  | 88674426  | 88778351  | Mgll          | 5,815829601  | 0,00043289 | 0,0038344  |
| AK012530  | chr8  | 35882847  | 35885006  | Dusp4         | 5,805820627  | 0,00313571 | 0,0071638  |
| BC024934  | chr11 | 73118493  | 73138136  | Aspa          | 5,796009662  | 0,00289759 | 0,00695193 |
| NM_134147 | chr19 | 7131257   | 7272551   | Macrod1       | 5,786816913  | 0,00211271 | 0,00603178 |
| AI481067  | chr2  | 30200322  | 30214814  | Sh3glb2       | 5,782727021  | 0,00206897 | 0,00597841 |
| BC019201  | chr19 | 55144224  | 55173925  | Gpam          | 5,739658892  | 0,00363999 | 0,00772652 |
| BC010403  | chr1  | 182157582 | 182175891 | Psen2         | 5,739440082  | 0,00168126 | 0,00543469 |
| NM_133764 | chr6  | 48487608  | 48491800  | Atp6v0e2      | 5,722358961  | 0,00026271 | 0,00333347 |
| BB554636  | chr6  | 38640570  | 38642322  | Hipk2         | 5,722120979  | 0,00105786 | 0,0047024  |
| NM_013760 | chrX  | 153978613 | 153979685 | Dnajb9        | 5,7062020776 | 0,00160333 | 0,00533584 |
| NM_012044 | chr4  | 138433856 | 138438730 | Pla2g2e       | 5,698846761  | 0,0021144  | 0,00603178 |
| AK009798  | chr7  | 146421791 | 146428875 | Lrrc27        | 5,682969608  | 0,00068405 | 0,00422116 |
| BB251723  | NA    | NA        | NA        | Xrcc3         | 5,682949912  | 0,00250698 | 0,0064624  |
| BB258019  | chr3  | 121970813 | 121972900 | Gclm          | 5,671361034  | 0,00088444 | 0,00452426 |
| BC026671  | chr13 | 60862021  | 60863605  | Dapk1         | 5,665624549  | 0,00566989 | 0,00979489 |
| NM_008494 | chr5  | 141083296 | 141091499 | Lfng          | 5,663955772  | 0,00253864 | 0,00650846 |
| AK003909  | chr9  | 21725452  | 21726333  | Tmem205       | 5,660541221  | 0,0004375  | 0,00383854 |
| AK012088  | chr1  | 78654464  | 78704315  | Acsl3         | 5,621070853  | 0,00214326 | 0,00605606 |
| BC010590  | chr11 | 53796618  | 53841760  | Slc22a4       | 5,611610984  | 0,00221577 | 0,00617431 |
| NM_009270 | chr15 | 59146592  | 59162748  | Sqle          | 5,606809295  | 0,00012466 | 0,00307567 |
| NM_138656 | chr8  | 124957500 | 124967317 | Mvd           | 5,60511899   | 0,00142653 | 0,00519821 |
| NM_021462 | chr10 | 80128069  | 80138955  | Mknk2         | 5,604342009  | 0,00265813 | 0,00668414 |
| NM_009201 | chr7  | 17366703  | 17383623  | Slc1a5        | 5,598731523  | 0,00228984 | 0,00624279 |
| BB387838  | chr5  | 123567871 | 123568277 | Rhof          | 5,582320667  | 0,00231559 | 0,00628931 |
| AV084342  | chr8  | 47082261  | 47085214  | Ankrd37       | 5,57996085   | 0,00113859 | 0,00484102 |
| BE688907  | chr13 | 23710844  | 23711373  | Hist1h2be     | 5,563026585  | 0,00016204 | 0,0032003  |
| BB482650  | chr6  | 58883530  | 58885065  | Fam13a        | 5,562679556  | 0,00068203 | 0,00422116 |
| NM_080289 | chr4  | 44994265  | 45003606  | Grhpr         | 5,533356976  | 0,00060221 | 0,00410983 |
| AA472735  | chr11 | 90110849  | 90112931  | Mmd           | 5,513353096  | 0,00072368 | 0,0042683  |
| BC020080  | chr6  | 34813102  | 34823868  | Tmem140       | 5,506058736  | 0,0009805  | 0,00460358 |
| BC025904  | chr9  | 20678249  | 20684169  | Angptl6       | 5,505448128  | 0,00026164 | 0,00333347 |
| AK011438  | chr16 | 32230199  | 32232704  | Fbxo45        | 5,48638171   | 0,0002652  | 0,00333347 |

|           |       |           |           |                 |             |            |            |
|-----------|-------|-----------|-----------|-----------------|-------------|------------|------------|
| AK003393  | chr9  | 54442900  | 54451743  | Idh3a           | 5,463289979 | 0,00044778 | 0,0038642  |
| NM_011837 | chr15 | 75395177  | 75397612  | Ly6h            | 5,405825716 | 0,00052612 | 0,00398232 |
| BQ174086  | chr3  | 89196052  | 89202145  | Gm15417         | 5,404439491 | 0,00329421 | 0,00731422 |
| NM_009949 | chr4  | 107576586 | 107596215 | Cpt2            | 5,403746512 | 6,52E-05   | 0,00294864 |
| BB005488  | chr5  | 28397902  | 28405202  | Insig1          | 5,401106515 | 0,00174201 | 0,00552076 |
| BC026559  | chr11 | 69823689  | 69828930  | Acadvl          | 5,374144079 | 1,36E-05   | 0,00209344 |
| BB315861  | chr5  | 106129811 | 106244229 | Lrrc8d          | 5,370029449 | 8,94E-05   | 0,00305957 |
| BB787147  | chr9  | 100882450 | 100935359 | Pccb            | 5,361326513 | 5,84E-05   | 0,00294864 |
| NM_009695 | chr7  | 20256932  | 20263290  | Apoc2           | 5,353936396 | 0,00312633 | 0,00714612 |
| AW989410  | chr12 | 33505199  | 33536814  | Nampt           | 5,351190911 | 0,00174999 | 0,00552837 |
| NM_033146 | chr14 | 56200357  | 56204153  | Fam158a         | 5,3230016   | 0,00021332 | 0,00329692 |
| NM_008129 | chr3  | 121948513 | 121969858 | Gclm            | 5,302673792 | 0,00099421 | 0,00461114 |
| AF215668  | chr1  | 145847835 | 145851279 | Rgs2            | 5,297383664 | 0,00095426 | 0,00457431 |
| AI849317  | chr11 | 102973059 | 102973514 | Acdb4           | 5,263454583 | 0,00135293 | 0,00511581 |
| AV307274  | chr10 | 80827974  | 80828970  | F630110N24Rik   | 5,263308652 | 0,00059584 | 0,00410983 |
| NM_008650 | chr17 | 41071635  | 41099267  | Mut             | 5,261776611 | 2,37E-05   | 0,00228372 |
| AW558570  | chr8  | 80186928  | 80187961  | Ednra           | 5,219602709 | 0,0052792  | 0,00941806 |
| AV313559  | chr1  | 51526331  | 51534984  | Obfc2a          | 5,21336547  | 0,0019559  | 0,00582205 |
| AW537713  | chr12 | 113041403 | 113052063 | Xrcc3           | 5,191818683 | 0,00188546 | 0,00572535 |
| BB439194  | chr3  | 51037517  | 51038306  |                 | 5,155831089 | 0,00211575 | 0,00603178 |
| AV221988  | chr2  | 118687717 | 118708643 | Ivd             | 5,138367227 | 0,00084403 | 0,00446825 |
| BQ176847  | chr12 | 33536962  | 33538234  | Nampt           | 5,13591028  | 0,0002987  | 0,00345047 |
| BB291885  | chr14 | 118881913 | 118889789 | Abcc4           | 5,134646656 | 0,00417759 | 0,00830355 |
| BE995545  | chr19 | 23215436  | 23239716  | Klf9            | 5,112804988 | 0,00045304 | 0,0038642  |
| AF170301  | chr6  | 38646948  | 38825939  | Hipk2           | 5,112043101 | 0,00429992 | 0,00841092 |
| BB478992  | chr13 | 54167232  | 54203711  | Sfxn1           | 5,1108562   | 0,00374794 | 0,00782998 |
| NM_019975 | chr14 | 32421040  | 32454150  | Hacl1           | 5,100045082 | 0,00124885 | 0,00498508 |
| BC019834  | chr7  | 38968264  | 38981615  | 1600014C10Rik   | 5,085800956 | 0,00233489 | 0,00630074 |
| AV174595  | chr6  | 94554522  | 94555197  | Lrig1           | 5,083175353 | 0,00196224 | 0,00582873 |
| NM_019503 | chr7  | 31836726  | 31839826  | Fxyd1           | 5,082505953 | 0,00434247 | 0,00844953 |
| BE949265  | chr17 | 45868076  | 45869167  | BE949265        | 5,071789961 | 0,00089149 | 0,00452836 |
| NM_008399 | chr11 | 72904084  | 72960948  | Itgae           | 5,051791161 | 0,00496573 | 0,00911889 |
| AK011810  | chr1  | 4761185   | 4762628   | Pdhb            | 5,049778122 | 0,00090081 | 0,00453233 |
| NM_134130 | chr18 | 10644408  | 10706769  | Abhd3           | 5,043027177 | 0,00151591 | 0,00527107 |
| BC003491  | chr4  | 62160040  | 62163334  | Hdhd3           | 5,039375639 | 0,00531942 | 0,00945679 |
| BB349707  | chr9  | 217211226 | 21722565  | Rab3d           | 5,033720108 | 0,00101968 | 0,00466253 |
| C77434    | chr10 | 76016109  | 76016658  | Lss             | 5,026607356 | 0,00407063 | 0,00815063 |
| BC019945  | chrX  | 70163859  | 70203867  | Nsdhl           | 5,002398536 | 0,00089089 | 0,00452836 |
| BB028312  | chr14 | 19365229  | 19365473  | Fdft1           | 5,002381199 | 0,00123571 | 0,00497083 |
| NM_022316 | chr12 | 82127796  | 82287401  | Smoc1           | 4,989170594 | 0,00357847 | 0,00766308 |
| BI111416  | chr7  | 147291608 | 147302334 | Echs1           | 4,976374292 | 0,00330756 | 0,00733195 |
| C78422    | chr4  | 21806821  | 21838475  | Coq3            | 4,972736547 | 4,01E-05   | 0,00273743 |
| NM_024229 | chr11 | 120471400 | 120479251 | Pcyt2           | 4,966398407 | 3,52E-05   | 0,00259841 |
| AV024565  | chr3  | 40621991  | 40650791  | Mfsd8           | 4,959483911 | 0,00324103 | 0,00724554 |
| NM_010191 | chr14 | 19363811  | 19365475  | Fdft1           | 4,952458892 | 6,76E-05   | 0,00299762 |
| NM_007856 | chr7  | 151016043 | 151034315 | Dhcr7           | 4,938541386 | 0,00166014 | 0,00542316 |
| NM_007830 | chr1  | 122009866 | 122017651 | Dbi             | 4,923980335 | 2,42E-05   | 0,00228372 |
| BG071076  | chr7  | 104055248 | 104057702 | Odz4            | 4,922325287 | 0,00415398 | 0,00827777 |
| NM_019814 | chr9  | 121757680 | 121766675 | Gm9790, Higd1a  | 4,921318881 | 0,00237544 | 0,00634084 |
| AA152997  | chr6  | 8209449   | 8547546   | Glcc1           | 4,907216763 | 0,00216191 | 0,00608825 |
| BQ177161  | chr19 | 58870236  | 58871609  | Hspa12a         | 4,90337466  | 0,00331948 | 0,0073357  |
| D31824    | chr19 | 53385154  | 53446304  | Mxi1            | 4,898805457 | 0,00168325 | 0,00543469 |
| AV005520  |       | NA        | NA        | Exoc6           | 4,894902081 | 0,00213795 | 0,00604917 |
| AV223468  | chr12 | 78920567  | 78921142  | Brp44l, LOC1001 | 4,887070782 | 0,0030237  | 0,0070488  |
| BC019364  | chr12 | 45370145  | 45413561  | Pnpla8          | 4,88481864  | 0,0002647  | 0,0033347  |
| AK016742  | chr6  | 38767903  | 38787310  | Hipk2           | 4,883498319 | 0,00057045 | 0,0040882  |
| NM_023732 | chr1  | 75168202  | 75176973  | Abcb6           | 4,859608919 | 0,00098882 | 0,00460391 |
| BC018275  | chr12 | 8504468   | 8506825   | Rhob            | 4,853447882 | 0,00374905 | 0,00782998 |
| NM_013562 | chr12 | 40929715  | 40949760  | Ifrd1           | 4,845615731 | 0,00041347 | 0,00381145 |
| BB533903  | chr13 | 23831949  | 23832235  | Hist1h1c        | 4,844742541 | 0,00350705 | 0,00757014 |
| AV084904  |       | NA        | NA        | Ccl6            | 4,835784653 | 0,00133336 | 0,00510593 |
| NM_026172 | chr4  | 15843888  | 15872534  | Decr1           | 4,819621996 | 0,002076   | 0,00599201 |
| BM119088  | chr11 | 77994997  | 77996034  | Tlcd1           | 4,805494845 | 0,00514335 | 0,00929957 |
| AK018760  | chr7  | 148615647 | 148623707 | Slc25a22        | 4,798222304 | 0,00205845 | 0,00597431 |
| C87579    | chr11 | 54863238  | 54863819  | Ccdc69          | 4,777000408 | 0,00126021 | 0,00500052 |
| BM120593  | chr1  | 121549045 | 121552221 | B230337E12Rik   | 4,77360767  | 8,41E-05   | 0,00305957 |
| AK017486  | chr8  | 80195095  | 80248350  | Ednra           | 4,752115825 | 0,00291086 | 0,0069729  |
| AI414736  | chr4  | 119126235 | 119126503 | Zmynd12         | 4,736823775 | 2,67E-05   | 0,00242681 |
| BI218684  | chr11 | 119004358 | 119006892 | Tbc1d16         | 4,72528059  | 0,00060545 | 0,00410983 |
| BB462688  | chr2  | 124492091 | 124493506 | Sema6d          | 4,712442451 | 0,00309623 | 0,00711854 |
| BB770932  | chr18 | 63112262  | 63113459  | Apcdd1          | 4,696968766 | 0,00227833 | 0,00624277 |
| BB641782  | chr17 | 80274926  | 80295463  | Atl2            | 4,683558223 | 0,00239684 | 0,00634729 |
| BC003914  | chr6  | 52496225  | 52590345  | Hibadh          | 4,645696799 | 0,00399946 | 0,00807515 |
| AV316233  | chr10 | 62407408  | 62409250  | Slc25a16        | 4,644376725 | 9,63E-05   | 0,00305957 |
| AB034914  | chr11 | 116033206 | 116060085 | Acox1           | 4,642735204 | 0,00167504 | 0,00543469 |
| AI875682  | chr1  | 58579419  | 58580529  | Fam126b         | 4,636496288 | 0,00203232 | 0,00593921 |
| NM_008195 | chr7  | 52690208  | 52712005  | Gys1            | 4,624893038 | 0,00395718 | 0,00804265 |
| NM_008898 | chr5  | 136164911 | 136211196 | Por             | 4,623931418 | 0,00106353 | 0,00470838 |
| AI987654  | chr5  | 125994556 | 125997781 | Aacs            | 4,606321155 | 0,00010589 | 0,00305957 |
| BB374634  | chr7  | 88738828  | 88741723  | Whamm           | 4,591132281 | 0,00174428 | 0,00552076 |
| BM200015  | chr4  | 59594539  | 59631561  | Hsd12           | 4,59100499  | 0,00139152 | 0,00513572 |
| BG065709  | chr3  | 121707059 | 121707678 | Arhgap29        | 4,586218212 | 0,00288542 | 0,00694645 |

|           |       |           |           |                  |             |            |            |
|-----------|-------|-----------|-----------|------------------|-------------|------------|------------|
| BQ042988  | chr5  | 114882309 | 114894034 | Mmab             | 4,586043375 | 0,0031702  | 0,00718159 |
| AY007382  | chr3  | 129584101 | 129597907 | Pla2g12a         | 4,582722728 | 0,00047183 | 0,00388101 |
| AK011417  | chr2  | 84679566  | 84703743  | Slc43a1          | 4,582182755 | 0,0030908  | 0,00711715 |
| AV260982  | chr11 | 100947679 | 100947932 | Coasy            | 4,579610814 | 0,00131614 | 0,00507697 |
| BC023398  | chr14 | 122580925 | 122801454 | Clybl            | 4,575137175 | 0,00180822 | 0,00560537 |
| AW554392  | chr13 | 42633763  | 43635038  |                  | 4,549332873 | 6,25E-05   | 0,00294864 |
| BB667859  | chr2  | 102860982 | 102913669 | Pdhx             | 4,548229332 | 0,0024234  | 0,00637481 |
| AK011304  | chrX  | 136991147 | 137010679 | Prps1            | 4,547551575 | 0,00153307 | 0,00527283 |
| NM_025661 | chr11 | 98442569  | 98448498  | Ormdl3           | 4,54122022  | 0,00375533 | 0,00782998 |
| AK008243  | chr11 | 102963025 | 102973514 | Acbd4            | 4,504571889 | 0,00091545 | 0,00453233 |
| NM_008458 | chr12 | 105385116 | 105392082 | Serpina3c        | 4,494435734 | 0,00121904 | 0,00493649 |
| AV231491  | chr5  | 43680282  | 43680962  | Cpeb2            | 4,488396103 | 0,00091152 | 0,00453233 |
| BM241351  | chr10 | 18720715  | 18721390  | Tnfaip3          | 4,481758776 | 0,00091299 | 0,00453233 |
| NM_016778 | chr1  | 95582283  | 95592352  | Bok              | 4,477287621 | 0,00496898 | 0,00912099 |
| BB235708  | chr5  | 43677575  | 43678277  | Cpeb2            | 4,469783642 | 0,00018861 | 0,00322705 |
| AK003718  | chr6  | 38637512  | 38639055  | Hipk2            | 4,464318631 | 0,00065678 | 0,00419404 |
| AK013719  | chr7  | 53171458  | 53172019  | 2900057H02Rik,   | 4,458551248 | 0,00012165 | 0,00307567 |
| AV043667  | chr2  | 92223362  | 92223758  | 1700029115Rik    | 4,456125918 | 0,0033822  | 0,00742613 |
| BB817847  | chr4  | 15924266  | 15929268  | Osgin2           | 4,454195867 | 0,00239665 | 0,00634729 |
| AI553394  | chr9  | 43877532  | 43903708  | Usp2             | 4,440077935 | 0,00251137 | 0,0064624  |
| AI851949  | chr11 | 60214125  | 60230541  | Atpaf2           | 4,438677836 | 0,00037162 | 0,00368458 |
| BB043703  | chr1  | 53376840  | 53383018  | Osgep1           | 4,433542791 | 0,00064888 | 0,00419404 |
| AV376136  | chr15 | 12289100  | 12291470  | Pdzd2            | 4,425897377 | 0,00226163 | 0,00621535 |
| BB825697  | chr19 | 53404044  | 53447783  | Mxi1             | 4,421834411 | 0,00135477 | 0,00511631 |
| NM_009804 | chr2  | 103294063 | 103325310 | Cat              | 4,419674126 | 0,00411139 | 0,00821711 |
| NM_016710 | chrX  | 106199748 | 106208719 | Hmgn5            | 4,413918526 | 1,13E-05   | 0,00204316 |
| AF208292  | chr6  | 38647908  | 38787223  | Hipk2            | 4,410370938 | 0,0008977  | 0,00453233 |
| NM_021400 | chr1  | 152296998 | 152312728 | Prg4             | 4,40908717  | 7,38E-05   | 0,00305277 |
| BC026817  | chr5  | 125956183 | 125998402 | Aacs             | 4,407055301 | 0,00072796 | 0,00427811 |
| AK017345  | chr19 | 34886548  | 34953811  | Pank1            | 4,404642718 | 0,00430129 | 0,00841092 |
| BB609792  | chr19 | 29141794  | 29144004  | Gm9895, LOC10    | 4,404459538 | 0,00448064 | 0,00858377 |
| BI695530  | chr12 | 32643342  | 32746122  | Prkar2b          | 4,402323    | 0,00132833 | 0,00509624 |
| BB045429  | chr11 | 23546483  | 23565943  | Pex13            | 4,389190842 | 0,00101865 | 0,00466253 |
| NM_008149 | chr19 | 55142129  | 55201706  | Gpam             | 4,385647929 | 0,00061372 | 0,00410983 |
| NM_008377 | chr6  | 94554524  | 94650158  | Lrig1            | 4,384204214 | 0,0001194  | 0,00307567 |
| K02782    | chr17 | 57343391  | 57367519  | C3               | 4,349546536 | 1,34E-05   | 0,00209344 |
| NM_011014 | chr4  | 41685368  | 41688232  | Sigmar1          | 4,348446246 | 0,00147277 | 0,00523849 |
| BC006604  | chr5  | 91946710  | 92053020  | Parm1            | 4,338826809 | 0,00565489 | 0,00978428 |
| AF226605  | chr4  | 41686226  | 41688125  | Sigmar1          | 4,324969624 | 0,00096154 | 0,00458346 |
| BB701297  | chr1  | 58584094  | 58586821  | Fam126b          | 4,320115848 | 0,0012837  | 0,00503101 |
| AB056479  | chr10 | 127774789 | 127799535 | Cs               | 4,299100987 | 6,20E-05   | 0,00294864 |
| AV282911  | chr2  | 11393420  | 11404197  | Pfkfb3           | 4,291776655 | 0,00151609 | 0,00527107 |
| AK009282  | chr2  | 49643205  | 49804367  | Lypd6b           | 4,282831743 | 0,00522442 | 0,00938145 |
| BB080456  | chr18 | 38745900  | 38746295  | Spry4            | 4,272676235 | 0,00234246 | 0,00630708 |
| NM_015786 | chr13 | 23830675  | 23832236  | Hist1h1c         | 4,271743435 | 0,00045762 | 0,00387057 |
| BB157359  | chr5  | 123561593 | 123562273 | LOC100503148     | 4,265751724 | 0,00207665 | 0,00599201 |
| M62361    | chr4  | 107716444 | 107791131 | Scp2             | 4,261112082 | 0,00094596 | 0,00455465 |
| BB094429  | chr1  | 89834811  | 89841754  | Dgkd             | 4,243883344 | 0,00011371 | 0,00305957 |
| BG094881  | chr3  | 142364021 | 142407875 | Ccbl2            | 4,217315633 | 0,00047734 | 0,00388445 |
| AV253991  | chr3  | 154756401 | 154857242 | Lrriq3           | 4,217081782 | 0,00069165 | 0,00422116 |
| AI647805  | chr12 | 32016426  | 32036291  | Dld              | 4,208000862 | 0,00151943 | 0,00527107 |
| BB504570  | chr4  | 40145134  | 40145369  | Aco1             | 4,205230848 | 0,00017023 | 0,0032003  |
| NM_134006 | chr10 | 128350648 | 128356312 | Rhd5             | 4,203846525 | 0,00503827 | 0,00919949 |
| NM_016895 | chr4  | 128670479 | 128689041 | Ak2              | 4,19792095  | 0,00114031 | 0,00484102 |
| AI480562  | chr7  | 121418625 | 121419075 | Psmal1           | 4,195724643 | 0,0003509  | 0,00358878 |
| BQ177047  | chr5  | 139871122 | 139872368 | Gpr146           | 4,194968565 | 0,00398718 | 0,00805967 |
| C77390    | chr11 | 5425326   | 5425873   | Xbp1             | 4,188692567 | 0,00362601 | 0,00771976 |
| BI099836  | chr5  | 66408670  | 66542217  | Rbm47            | 4,180063909 | 0,00418741 | 0,00831546 |
| NM_027288 | chr3  | 135148574 | 135234366 | Manba            | 4,176139776 | 0,00117061 | 0,00487257 |
| NM_019469 | chr13 | 23844248  | 23844659  | Hist1h3a, Hist1h | 4,163018588 | 0,00121291 | 0,0049334  |
| AV336908  | chr9  | 50442737  | 50468071  | Dlat             | 4,142624339 | 3,35E-06   | 0,00128077 |
| AA543265  | chr18 | 35113701  | 35115586  | Hspa9            | 4,141002288 | 0,00252951 | 0,00649272 |
| NM_010638 | chr19 | 23216244  | 23240447  | Klf9             | 4,132142479 | 0,00308001 | 0,00710759 |
| X16834    | chr14 | 47999308  | 48005842  | Lgals3           | 4,097360978 | 1,69E-05   | 0,00209344 |
| NM_023742 | chr5  | 136470746 | 136508734 | Dtx2             | 4,089926736 | 0,00085565 | 0,00447452 |
| BB318769  | chr11 | 21470048  | 21470739  | Mdh1             | 4,086016415 | 0,00431568 | 0,00842382 |
| AI267126  | chr19 | 23239392  | 23240496  | Klf9             | 4,083949424 | 0,00404323 | 0,0081295  |
| NM_027356 | chr5  | 137735868 | 137736893 | Ufsp1            | 4,083312549 | 0,00326024 | 0,00726859 |
| BB553369  | chr2  | 71741235  | 71741904  | Pdk1             | 4,080341777 | 0,00017554 | 0,0032003  |
| BB115327  | chr1  | 122009851 | 122010210 | Dbi              | 4,07405371  | 0,0014972  | 0,00527107 |
| AB052828  | chr11 | 82692238  | 82704091  | Rad51l3          | 4,064365087 | 0,00548327 | 0,00961786 |
| BB750646  | chr12 | 35056361  | 35056837  | Hdac9            | 4,062844082 | 0,0049481  | 0,0091019  |
| NM_007382 | chr3  | 153585320 | 153607593 | Acadm            | 4,056807931 | 0,00036009 | 0,00362845 |
| NM_007808 | chr16 | 16048923  | 16049852  | Cyca             | 4,040391243 | 0,0003682  | 0,00367607 |
| NM_008618 | chr11 | 21456694  | 21471927  | Mdh1             | 4,036080642 | 0,00049744 | 0,0039286  |
| NM_013671 | chr17 | 13200786  | 13209250  | Sod2             | 4,029218379 | 0,00156952 | 0,00527587 |
| BB259628  | chr4  | 82872304  | 82879074  | Ttc39b           | 4,027124292 | 0,00099272 | 0,00461114 |
| NM_134007 | chr10 | 70792946  | 70807637  | Cisd1            | 4,020528063 | 0,00112501 | 0,00481846 |
| NM_025318 | chr11 | 72989020  | 72990539  | Tmem93           | 4,020374791 | 0,00439551 | 0,00850384 |
| AI156158  | chr1  | 75369905  | 75364987  | Dm               | 4,01895382  | 0,00180469 | 0,00559839 |
| BB048100  | chr9  | 107244831 | 107250967 | 6430571L13Rik    | 4,016809383 | 0,00368623 | 0,00777151 |
| BC006753  | chr6  | 124613110 | 124654436 | Lpcat3           | 4,013678333 | 0,00090654 | 0,00453233 |

|           |       |           |           |                  |             |            |            |
|-----------|-------|-----------|-----------|------------------|-------------|------------|------------|
| BC004574  | chr19 | 29175864  | 29218420  | Rcl1             | 3,989574813 | 0,00117923 | 0,00488682 |
| BC019483  | chr3  | 157557201 | 157588019 | Cth              | 3,981770307 | 0,00040742 | 0,00379856 |
| NM_007383 | chr5  | 115560308 | 115569341 | Acads            | 3,981121771 | 0,00187102 | 0,00570635 |
| BB325197  | chr1  | 193195028 | 193195709 |                  | 3,98004571  | 0,0050716  | 0,00923907 |
| BC022110  | chr9  | 106135793 | 106150220 | Alas1            | 3,976350691 | 0,0005209  | 0,00396887 |
| BG074320  | chr3  | 121714293 | 121719669 | Arhgap29         | 3,974917728 | 0,00102536 | 0,00467753 |
| BB794831  | chr2  | 135299767 | 135300993 | Plcb1            | 3,970484325 | 0,00261642 | 0,00661496 |
| NM_013550 | chr13 | 23852560  | 23853099  | Hist1h4a, Hist1h | 3,970456804 | 0,00160558 | 0,00533923 |
| BC003487  | chr15 | 79116659  | 79158583  | Pla2g6           | 3,961975613 | 0,00065744 | 0,00419404 |
| BQ175876  | chr7  | 104057702 | 104059600 | Odz4             | 3,957844688 | 0,0058723  | 0,00999349 |
| AV228731  | chr9  | 30706739  | 30712405  | Adamts15         | 3,95215629  | 0,00524871 | 0,00939619 |
| NM_130886 | chr11 | 119169081 | 119206735 | Card14           | 3,951060671 | 0,00181525 | 0,00561096 |
| NM_010098 | chr1  | 177592554 | 177622761 | Opn3             | 3,944124247 | 0,00311188 | 0,00713565 |
| BC027196  | chr2  | 71711280  | 71740132  | Pdk1             | 3,937868677 | 0,00048013 | 0,00388445 |
| NM_021534 | chr2  | 154412429 | 154429424 | Pxmp4            | 3,929715856 | 0,00032788 | 0,00356889 |
| AK011596  | chr16 | 32630179  | 32632876  | Tfrc             | 3,923387955 | 0,00144773 | 0,00522274 |
| AI507307  | chr7  | 31536489  | 31541151  | Sbsn             | 3,908350896 | 5,07E-06   | 0,00137691 |
| AF091432  | chr4  | 11118911  | 11131926  | Ccne2            | 3,90752472  | 0,00116198 | 0,00487257 |
| BE626145  | chr3  | 88138663  | 88139103  | BC038331         | 3,903382927 | 0,00237052 | 0,00634084 |
| AK005293  | chr2  | 30121722  | 30137667  | Phyhdl1          | 3,90247665  | 0,0016114  | 0,00534629 |
| BQ266486  | chr11 | 94071219  | 94076809  | Tob1             | 3,898232124 | 0,00269206 | 0,00671547 |
| AK011505  | chr9  | 75256133  | 75257797  | Mapk6            | 3,896273631 | 0,00212867 | 0,00604631 |
| NM_009191 | chr7  | 108812246 | 108936328 | Clpb             | 3,891253583 | 0,00155571 | 0,00552783 |
| BG072404  | chr6  | 29718491  | 29862310  | Ahcyl2           | 3,886819198 | 0,00091331 | 0,00453233 |
| BE949408  | chr19 | 28997553  | 29018886  | 4430402118Rik    | 3,883183814 | 0,00028644 | 0,00338967 |
| BB379386  | chr17 | 36029619  | 36030046  | 2310061104Rik    | 3,88212077  | 0,00042851 | 0,00382629 |
| AF075434  | chr16 | 25684375  | 25876984  | Trp63            | 3,859663304 | 0,00263991 | 0,00666191 |
| BB108855  | chr4  | 21838498  | 21839295  | Coq3             | 3,845390203 | 0,00387703 | 0,00795744 |
| AV226579  | chr6  | 54767262  | 54842761  | Znrf2            | 3,844697256 | 0,00073104 | 0,0042846  |
| BC012522  | chr3  | 79407707  | 79432785  | Etfhd            | 3,841261018 | 8,03E-05   | 0,00305957 |
| BQ176864  | chr19 | 36806038  | 36807187  | Ppp1r3c          | 3,840009819 | 0,00074545 | 0,00432122 |
| BC016135  | chr9  | 75154111  | 75193282  | Gnb5             | 3,838466348 | 0,00094025 | 0,00454531 |
| BC004749  | chr17 | 24987448  | 25001395  | Hagh             | 3,833069083 | 0,00524447 | 0,00939523 |
| BI456953  | chr3  | 87329499  | 87344078  | Etv3             | 3,822787483 | 0,00018931 | 0,00322705 |
| BC020046  | chr11 | 100943899 | 100947933 | Coasy            | 3,81411938  | 1,63E-05   | 0,00209344 |
| NM_025846 | chr7  | 121190296 | 121261280 | Rras2            | 3,809627659 | 0,00439975 | 0,00850384 |
| BM247599  | chr2  | 103321338 | 103322092 |                  | 3,80548412  | 0,00307883 | 0,00710759 |
| NM_133706 | chr16 | 22230413  | 22231726  | Tmem97           | 3,804982979 | 0,00223313 | 0,00619314 |
| BB772682  | chr5  | 114881055 | 114882806 | Mmab             | 3,796671032 | 0,00135632 | 0,00511774 |
| NM_133667 | chr11 | 94887572  | 94902670  | Pdk2             | 3,796460506 | 0,00300675 | 0,00703572 |
| AF356874  | chr4  | 43667100  | 43669323  | Hint2            | 3,795329127 | 0,00175717 | 0,00552837 |
| NM_023058 | chr17 | 23863280  | 23873702  | Pkmyt1           | 3,793317158 | 0,00166236 | 0,00542421 |
| AV225967  | chr7  | 96288230  | 96487276  | Tmem135          | 3,788075276 | 0,00026253 | 0,0033347  |
| AK005865  | chr17 | 45585885  | 45611887  | Spats1           | 3,782499784 | 0,00076125 | 0,00436395 |
| AV273867  | chr5  | 44566402  | 44568530  | Tapt1            | 3,780651846 | 0,00115859 | 0,00487257 |
| BM239615  | chr11 | 106363539 | 106428435 | Tex2             | 3,770889826 | 0,00541459 | 0,00955142 |
| BC021914  | chr11 | 90110769  | 90139903  | Mmd              | 3,765496228 | 4,16E-05   | 0,00273743 |
| BF322962  | chr3  | 40870258  | 40886944  | Pgrmc2           | 3,758117046 | 0,00076858 | 0,00436395 |
| NM_025297 | chr4  | 131399385 | 131423951 | Mecr             | 3,752260526 | 0,00226403 | 0,00621535 |
| BB216074  | chr12 | 32643340  | 32652119  | Prkar2b          | 3,749959463 | 0,00023925 | 0,0033347  |
| BC026740  | chr11 | 115469231 | 115474220 | Mif4gd           | 3,726122229 | 0,00390374 | 0,00799337 |
| BB357220  | chr15 | 38823802  | 38824101  | Atad3a           | 3,725683187 | 0,00121405 | 0,00493334 |
| NM_020010 | chr5  | 4080146   | 4104746   | Cyp51            | 3,72107637  | 0,00198957 | 0,0058673  |
| C81442    | chr5  | 97694414  | 97694985  | Slc25a5          | 3,720702397 | 0,00053525 | 0,00400832 |
| AV007315  | chr11 | 54013024  | 54013360  | Dbi              | 3,717067791 | 0,00259374 | 0,00658601 |
| BF228057  | chr7  | 138589288 | 138589718 | Acadsb           | 3,713050662 | 0,00147807 | 0,00524451 |
| BB805796  | chr6  | 52496224  | 52496603  | Hicadh           | 3,711905547 | 0,0007972  | 0,00442254 |
| AV124256  | chrX  | 142036243 | 142036499 | Pfdn5            | 3,709732085 | 0,00533933 | 0,00947312 |
| NM_009505 | chr17 | 46153941  | 46169322  | Vegfa            | 3,708896478 | 0,00426839 | 0,00840218 |
| NM_013479 | chr9  | 75195592  | 75199470  | Bcl2l10          | 3,707559897 | 0,00371685 | 0,00779821 |
| AJ306425  | chr13 | 23793903  | 23802680  | Hfe              | 3,70696887  | 0,00036974 | 0,00368297 |
| AW050030  | chr1  | 89749815  | 89750112  | Dgkd             | 3,705106469 | 0,00294507 | 0,00701091 |
| NM_024471 | chr5  | 65782735  | 65800447  | Lias             | 3,698832577 | 0,00084547 | 0,00446825 |
| AB029929  | chr6  | 17256426  | 17291323  | Cav1             | 3,690266482 | 0,00016244 | 0,0032003  |
| AK004575  | chr16 | 4684109   | 4707691   | Dnaja3           | 3,683353851 | 0,00160173 | 0,00533458 |
| AV030922  | chr7  | 133938748 | 133939176 | Aldoa            | 3,681184349 | 0,00142912 | 0,00519821 |
| AA673177  | chr6  | 54935641  | 54942701  | Ggct             | 3,675804403 | 0,00212599 | 0,00604267 |
| BB360457  | chr3  | 96044732  | 96045749  | Hist2h2aa1, Hist | 3,67391946  | 0,00016702 | 0,0032003  |
| BM118381  | chr3  | 156976613 | 156979409 | Negr1            | 3,672060937 | 0,00111034 | 0,0047999  |
| BG070093  | chr1  | 58581535  | 58583123  | Fam126b          | 3,660523534 | 0,00066535 | 0,00419404 |
| BB767129  | chr10 | 23545975  | 23547775  | 1110021L09Rik    | 3,658177301 | 0,00365507 | 0,00774672 |
| NM_018753 | chr2  | 163820888 | 163844665 | Ywhab            | 3,646026381 | 0,00391781 | 0,00801085 |
| BB768194  | chr8  | 37630796  | 37632367  | Dlc1             | 3,637141364 | 0,00453627 | 0,00864274 |
| AV354744  | chr19 | 23216670  | 23239969  | Klf9             | 3,636032261 | 0,00258802 | 0,00658556 |
| BE691552  | chr1  | 13614937  | 13650623  | Lactb2           | 3,635477836 | 0,00115146 | 0,00487049 |
| BB398988  | chr4  | 134769883 | 134828686 | Clc4             | 3,629774693 | 0,00160842 | 0,00534457 |
| BC025833  | chr4  | 141170147 | 141174153 | Tmem82           | 3,61830745  | 0,0013405  | 0,00510593 |
| AV248277  | chr19 | 37757571  | 37758537  | Exoc6            | 3,618131893 | 0,00099573 | 0,00461114 |
| NM_025402 | chr11 | 121038904 | 121066020 | 1110031I02Rik    | 3,615662457 | 0,00117246 | 0,00487257 |
| BB454777  | chr12 | 37108737  | 37416090  | Ispd             | 3,614973321 | 0,00177451 | 0,00554838 |
| NM_025558 | chr8  | 109674549 | 109711371 | Cyb5b            | 3,607388991 | 0,00300929 | 0,00703572 |
| BI106821  | chr5  | 92686765  | 92707207  | Naaa             | 3,604789459 | 0,00097519 | 0,00460358 |



|           |              |           |           |               |             |            |            |
|-----------|--------------|-----------|-----------|---------------|-------------|------------|------------|
| NM_134068 | chr13        | 30751867  | 30803094  | Dusp22        | 3,603627774 | 0,00217344 | 0,00609772 |
| AK017670  | chr10        | 117066775 | 117122359 | Cpm           | 3,599009723 | 0,00071044 | 0,00425558 |
| NM_009107 | chr2         | 169528624 | 169569753 | Xrxg          | 3,59650348  | 0,00040727 | 0,00379856 |
| BB458543  | chr5         | 125492626 | 125492918 | Fam101a       | 3,587515338 | 0,00363624 | 0,00772652 |
| AK014348  | chr5         | 115729700 | 115746983 | Coq5          | 3,565773339 | 0,00150549 | 0,00527107 |
| AK006658  | chr6         | 85396804  | 85401296  | 1700040I03Rik | 3,563895414 | 0,00419157 | 0,00831991 |
| NM_133943 | chr7         | 134944142 | 134947314 | Hsd3b7        | 3,561043354 | 0,00282793 | 0,00687812 |
| AK007582  | chr8         | 3458812   | 3467680   | Pex11c        | 3,558884223 | 0,00233945 | 0,00630334 |
| NM_010741 | chr15        | 74938587  | 74942237  | Ly6c1, Ly6c2  | 3,556960615 | 0,00243309 | 0,00639379 |
| BB174350  | chr17        | 36029532  | 36034049  | 2310061I04Rik | 3,545784851 | 0,0021994  | 0,00614609 |
| BB529627  | chr1         | 177612367 | 177613763 | Chml          | 3,537180891 | 0,00133615 | 0,00510593 |
| NM_016709 | chr13        | 52930492  | 53025030  | Auh           | 3,53180331  | 0,00188648 | 0,00572535 |
| AV094699  | chr14        | 32898573  | 32916389  | Oxnad1        | 3,518767031 | 0,00057154 | 0,0040882  |
| BB518874  | chr5         | 136508521 | 136508741 | Dtx2          | 3,51704794  | 0,00117272 | 0,00487257 |
| NM_019717 | chr17        | 80248402  | 80264137  | Atl2          | 3,507139946 | 0,00020992 | 0,00327926 |
| BI466860  | chr17        | 25001046  | 25001393  | Hagh          | 3,504479051 | 0,00013828 | 0,00315752 |
| BC010224  | chr14        | 37933496  | 37948475  | Ghitm         | 3,501553183 | 0,00132606 | 0,00509203 |
| BC006660  | chr1         | 63190183  | 63223367  | Ndufs1        | 3,498690386 | 0,00269094 | 0,00671547 |
| AV307614  | chr1         | 121444200 | 121451722 | Epb4.1I5      | 3,491241122 | 1,63E-05   | 0,00209344 |
| BB282093  | chr4         | 139178802 | 139205608 | Aldh4a1       | 3,487830668 | 0,00225759 | 0,00621535 |
| NM_133684 | chr1         | 186637555 | 186669742 | Mosc2         | 3,484000908 | 0,00398609 | 0,00805967 |
| NM_029573 | chr9         | 54434195  | 54452469  | Idh3a         | 3,481743684 | 0,00181255 | 0,00561096 |
| Z47205    | chr9         | 48465021  | 48644327  | Zbth16        | 3,475655278 | 0,00043612 | 0,00383854 |
| AI844734  | chr7         | 31539826  | 31541152  | Sbsn          | 3,472849762 | 0,00150922 | 0,00527107 |
| BF020441  | chr9         | 65142112  | 65178462  | Clpx          | 3,468892181 | 0,00070918 | 0,00425409 |
| AK014703  | chr19        | 37378139  | 37412342  | Ide           | 3,46692109  | 0,00094127 | 0,00454531 |
| BG866501  | chr2         | 108788926 | 108790894 | Hadhb         | 3,466524603 | 0,00083228 | 0,00446825 |
| BB446073  | chr14        | 17071172  | 17071886  | Oxsm          | 3,459791264 | 0,00056248 | 0,00407139 |
| BC017549  | chr1         | 167108821 | 167124537 | Sft2d2        | 3,458065031 | 0,00379485 | 0,00787437 |
| BF730541  | chr9         | 50697752  | 50698591  |               | 3,454902507 | 0,00014    | 0,00315752 |
| BM228625  | chr5         | 20264481  | 20265667  | Phtf2         | 3,454279926 | 0,00134203 | 0,00510593 |
| BB389081  | chr11        | 78380674  | 78380992  | Nlk           | 3,442340956 | 0,00367416 | 0,00777151 |
| AK003990  | chr15        | 84022658  | 84044734  | Samm50        | 3,441637143 | 0,0018658  | 0,00569842 |
| NM_133792 | chr8         | 108674386 | 108687236 | Pla2g15       | 3,43083561  | 0,00209011 | 0,0060075  |
| BC019155  | chr15        | 101759764 | 101770750 | Krt79         | 3,430574031 | 0,0050937  | 0,00925812 |
| BB368056  | chr4         | 155114751 | 155114961 | Atad3a        | 3,430562142 | 0,00334602 | 0,00737278 |
| AI551249  | chr5         | 108333967 | 108334375 |               | 3,430276808 | 0,00490232 | 0,00905991 |
| BM122201  | chr9         | 122744375 | 122745450 | D9Erdt402e    | 3,42833954  | 0,00545446 | 0,00960224 |
| AK003966  | chr13        | 30632144  | 30637200  | Uqcfs1        | 3,417958784 | 0,00057609 | 0,0040998  |
| AV169215  | chr7         | 148657071 | 148657378 | Cd151         | 3,415744347 | 0,00108663 | 0,00475729 |
| AK007421  | chr9         | 122260733 | 122290642 | Abhd5         | 3,406971786 | 0,00089353 | 0,00453233 |
| NM_009101 | chr7         | 52273311  | 52277016  | Rras          | 3,406180764 | 0,00129279 | 0,00503551 |
| AK009497  | chr5         | 130417868 | 130458761 | Vkorc1l1      | 3,393725787 | 0,00049972 | 0,0039286  |
| AW114007  | chr19        | 36693907  | 36694485  | 1500017E21Rik | 3,392737944 | 0,00175901 | 0,00552837 |
| BC004827  | chr19        | 15979615  | 15999549  | Psat1         | 3,38936498  | 0,00022082 | 0,00332788 |
| AV216491  | chr19        | 15979613  | 15979891  | Psat1         | 3,387873484 | 3,53E-05   | 0,00259841 |
| BB328290  | chr15        | 8635821   | 8636692   | Slc1a3        | 3,37301796  | 0,00561029 | 0,00974227 |
| BE688358  | chr19        | 11122101  | 11125056  | AW112010      | 3,372643901 | 0,00525829 | 0,00940559 |
| AF174535  | chr2         | 122607734 | 122635285 | Sqrdl         | 3,372515328 | 0,0006066  | 0,00410983 |
| NM_133783 | chr2         | 32251278  | 32258259  | Ptges2        | 3,367528137 | 0,00185789 | 0,00568793 |
| NM_011405 | chr14        | 54989057  | 55027888  | Slc7a7        | 3,36090555  | 0,00134404 | 0,00510688 |
| BC005604  | chr16        | 91614498  | 91619244  | Dnajc28       | 3,360719187 | 0,00373881 | 0,00782538 |
| AU019938  | chr15        | 81745057  | 81745569  | Aco2          | 3,358937613 | 0,00074744 | 0,00432122 |
| BC022913  | chr15        | 97614800  | 97623121  | Slc48a1       | 3,357599143 | 4,34E-06   | 0,00137691 |
| BC021466  | chr12        | 85626303  | 85655054  | Ptgr2         | 3,349974236 | 6,00E-05   | 0,00294864 |
| AV051768  | chr11        | 5425581   | 5425894   | Xbp1          | 3,342830027 | 0,00017415 | 0,0032003  |
| AI462296  | chr3         | 52072295  | 52154026  | Foxo1         | 3,337655378 | 0,00526151 | 0,00940747 |
| AW551319  | chr17        | 3519053   | 3557745   | Tfb1m         | 3,33278904  | 0,0002577  | 0,0033347  |
| NM_028582 | chr1         | 153191645 | 153203661 | Ivns1abp      | 3,33208453  | 0,00581979 | 0,00995499 |
| BG070803  | chr14        | 10718468  | 10719282  | Mnd1          | 3,330422014 | 0,00193744 | 0,00579349 |
| AV370981  | chr2         | 173051789 | 173102034 | Pmepa1        | 3,329879568 | 0,00048865 | 0,00391548 |
| AK017926  | chr10        | 59412417  | 59414561  | Ddit4         | 3,325842847 | 0,00061051 | 0,00410983 |
| BB051441  | chr2         | 120237172 | 120248726 | Ganc          | 3,321580778 | 0,00246641 | 0,00642461 |
| BC023062  | chr4         | 145335452 | 145338302 | Ppp2r5a       | 3,314623483 | 0,00426325 | 0,00840218 |
| AV373997  | chr12        | 16677420  | 16678361  | Greb1         | 3,311316702 | 0,00068603 | 0,00422116 |
| AK002992  | chr4         | 128788814 | 128798547 | Hpca          | 3,289937097 | 0,00111328 | 0,00480136 |
| AI314476  | chr14        | 31362348  | 31386884  | Tkt           | 3,286461308 | 0,00050312 | 0,00393272 |
| AK006551  | chr1         | 55109613  | 55128797  | Coq10b        | 3,286290462 | 0,00564139 | 0,00977285 |
| AK007856  | chr4         | 82905101  | 82970143  | Ttc39b        | 3,285766591 | 2,87E-05   | 0,00244744 |
| AK008716  | chr5         | 92053055  | 92055917  | Parm1         | 3,272753626 | 0,00502575 | 0,00918638 |
| NM_025567 | chr15        | 76173961  | 76176690  | Cyc1          | 3,270678607 | 0,00262055 | 0,00662074 |
| NM_010027 | chr10        | 75233974  | 75236133  | Ddt           | 3,265751463 | 0,00017175 | 0,0032003  |
| NM_025337 | chr4         | 138866658 | 138874331 | Akr7a5        | 3,261577705 | 0,00381682 | 0,00789748 |
| BC016270  | chrX         | 132567899 | 132569485 | 6530401D17Rik | 3,250969453 | 0,00135186 | 0,00511581 |
| NM_010468 | chr2         | 74574652  | 74585803  | Hoxd3         | 3,247816222 | 0,00348852 | 0,00755644 |
| NM_013842 | chr11        | 5421033   | 5425873   | Xbp1          | 3,246848344 | 0,00355724 | 0,00763672 |
| BB222675  | chr6         | 71781324  | 71827395  | Ibmt          | 3,237723981 | 6,84E-05   | 0,00299762 |
| NM_022433 | chr7         | 148049564 | 148068208 | Sirt3         | 3,236579632 | 0,00399111 | 0,00806205 |
| BB283832  | chr9         | 48638270  | 48638809  |               | 3,234953557 | 0,00483432 | 0,00897625 |
| BB497484  | chr13        | 97911880  | 97947441  | Gfm2          | 3,228345533 | 0,00216306 | 0,00608825 |
| BQ043509  | chr15        | 101041979 | 101044111 | Acvr1b        | 3,22368326  | 0,00295227 | 0,00701103 |
| BB705380  | chr13_random | 114526    | 132353    | Hmgcs1        | 3,219128128 | 0,00062751 | 0,00413991 |

|           |       |            |           |               |             |            |            |
|-----------|-------|------------|-----------|---------------|-------------|------------|------------|
| NM_134021 | chr11 | 96799136   | 96805323  | Pnpo          | 3,217555424 | 0,0009989  | 0,00461114 |
| BB667201  | chr8  | 1136659566 | 113663679 | Pdpr          | 3,214468025 | 0,00452004 | 0,00862849 |
| AV000569  | chr11 | 97546900   | 97549933  | Cisd3         | 3,213320759 | 0,00519105 | 0,00935078 |
| BC002008  | chr18 | 7581478    | 7582144   | Fabp5, Gm3601 | 3,209903665 | 0,00028103 | 0,00336228 |
| BM945176  | chr10 | 127940556  | 127941293 | LOC100502705  | 3,20563463  | 0,0047948  | 0,00894494 |
| AK004527  | chr8  | 97362316   | 97378795  | Coq9          | 3,203069274 | 0,00184538 | 0,00567597 |
| BM228846  | chr1  | 162970731  | 162987605 | Coqs2         | 3,198310487 | 0,00092671 | 0,00453527 |
| NM_133233 | chr15 | 38821682   | 38824101  | Atad3a        | 3,197457094 | 0,00281146 | 0,00686486 |
| AF023098  | chr14 | 101841576  | 101843380 | Tbc1d4        | 3,196615008 | 0,00010676 | 0,00305957 |
| BB131341  | chr11 | 82689935   | 82690613  | Rad51i3       | 3,196603929 | 0,00397905 | 0,00805807 |
| BE914497  | chr10 | 77450636   | 77451455  | Pfkl          | 3,195385517 | 0,00160068 | 0,00533458 |
| NM_007493 | chr11 | 69906145   | 69919686  | Asgr2         | 3,190450167 | 0,00555809 | 0,00969429 |
| BC003761  | chr19 | 40696265   | 40699089  | Ptp4a1        | 3,187013212 | 0,00335508 | 0,00738151 |
| NM_008826 | chr10 | 77450651   | 77472470  | Pfkl          | 3,183922015 | 0,00245601 | 0,00641784 |
| AK010754  | chr9  | 50674679   | 50689727  | Ppp2r1b       | 3,179434086 | 8,87E-05   | 0,00305957 |
| AI325112  | chr4  | 71818612   | 71858852  | Tle1          | 3,178761993 | 0,00193466 | 0,00579349 |
| AA111360  | NA    | NA         | NA        |               | 3,172972461 | 0,00422835 | 0,00835473 |
| NM_026398 | chr5  | 115685856  | 115690981 | Pop5          | 3,171993907 | 0,00210461 | 0,00602924 |
| BB132602  | chr15 | 83404345   | 83404631  | Tspo          | 3,166853216 | 0,00028808 | 0,00339293 |
| NM_030721 | chr5  | 35925760   | 35955700  | Acoc3         | 3,164724689 | 0,00042239 | 0,00382172 |
| BC019143  | chr14 | 79248990   | 79465077  | 1300010F03Rik | 3,162904509 | 6,79E-05   | 0,00299762 |
| AY039218  | chr19 | 4135809    | 4139608   | Cabp4         | 3,161764688 | 0,0013806  | 0,00512992 |
| BM120298  | chr18 | 68425430   | 68459987  | 4933403F05Rik | 3,159792891 | 0,0044107  | 0,00851363 |
| AK008409  | chr10 | 89174714   | 89195040  | Actr6         | 3,15525149  | 0,00156744 | 0,00527297 |
| AV024351  | chr7  | 117957044  | 117958863 | Rnf141        | 3,151470155 | 0,0009062  | 0,00453233 |
| NM_010023 | chr17 | 24563618   | 24576261  | Dci           | 3,148598934 | 0,00081069 | 0,00445108 |
| BB667090  | chr12 | 85655957   | 85656782  | Ptgr2         | 3,147027968 | 0,00027809 | 0,00335239 |
| BC025104  | chr4  | 107838095  | 107851912 | Echdc2        | 3,145152563 | 3,87E-05   | 0,00273709 |
| NM_007940 | chr14 | 66703209   | 66743322  | Ephx2         | 3,127413539 | 0,00022454 | 0,00332788 |
| AW553435  | chr1  | 187109447  | 187153280 | Iars2         | 3,126004814 | 0,00208643 | 0,0060009  |
| AV110784  | chrX  | 34338405   | 34338770  | Slc25a5       | 3,121749987 | 0,0056778  | 0,00980464 |
| BE333485  | chr12 | 33639061   | 33662398  | Sypl          | 3,115276031 | 0,00438007 | 0,00848845 |
| BB309883  | chr12 | 85714806   | 85715477  | Entpd5        | 3,098338994 | 0,00157846 | 0,00529412 |
| BB795072  | chr14 | 121941260  | 122006102 | Dock9         | 3,096728708 | 0,00111892 | 0,00480623 |
| C77512    | chr5  | 65796565   | 65800411  | Lias          | 3,092074329 | 0,00047375 | 0,00388445 |
| AA034553  | chr15 | 81719722   | 81745864  | Ac02          | 3,089160865 | 0,00014168 | 0,00315752 |
| NM_008212 | chr3  | 130936354  | 130975401 | Hadh          | 3,085693998 | 0,00371487 | 0,00779821 |
| NM_026842 | chr13 | 58278872   | 58282986  | Ubqln1        | 3,084410961 | 0,00074174 | 0,00431242 |
| NM_011256 | chr5  | 124568698  | 124666427 | Pitpnm2       | 3,084250619 | 0,00017036 | 0,0032003  |
| BM219457  | chr18 | 12347094   | 12348431  | 3110002H16Rik | 3,083331485 | 0,0006887  | 0,00422116 |
| AF021031  | chr16 | 18066535   | 18071456  | Dgcr6         | 3,077694429 | 0,00059334 | 0,00410983 |
| BB397062  | chr4  | 82885718   | 82888204  | Ttc39b        | 3,07624413  | 0,00260368 | 0,00660008 |
| AK009046  | chr9  | 63242253   | 63247042  | 2300009A05Rik | 3,074251085 | 0,00079748 | 0,00442254 |
| BB521978  | chr5  | 142960793  | 142961947 | Radil         | 3,072845007 | 0,00585811 | 0,00998343 |
| BB431372  | chr7  | 104211336  | 104212516 | Nars2         | 3,072568128 | 0,00238221 | 0,00634332 |
| NM_008323 | chrX  | 71024301   | 71032302  | Idh3g         | 3,067333427 | 0,0015601  | 0,00527283 |
| AF356876  | chr17 | 13117241   | 13133268  | Acac2, Acac3  | 3,065006216 | 0,00363776 | 0,00772652 |
| AK017451  | chr11 | 94189326   | 94200823  | Ankrd40       | 3,064156534 | 0,00345819 | 0,00753205 |
| BG075002  | chr7  | 127778715  | 127803037 | Uqcrc2        | 3,06394415  | 0,00034297 | 0,00358663 |
| AK017999  | chr6  | 125196422  | 125197499 |               | 3,061980298 | 0,00511766 | 0,00927242 |
| NM_010703 | chr3  | 130816771  | 130926599 | Lef1          | 3,054666756 | 0,00182377 | 0,00562545 |
| BC020004  | chr7  | 126115555  | 126138700 | Gprc5b        | 3,044541546 | 0,00024485 | 0,0033347  |
| BC027307  | chr6  | 120786229  | 120839024 | Bcl2l13       | 3,042611219 | 0,00036672 | 0,00366973 |
| BB113673  | chr7  | 148657055  | 148657378 | Cd151         | 3,03533342  | 0,00523199 | 0,00938172 |
| BB238381  | chr8  | 80193592   | 80194229  | Ednra         | 3,032231705 | 0,00509955 | 0,00925812 |
| BB452660  | chr2  | 84836712   | 84837395  | P2rx3         | 3,027443425 | 0,00472469 | 0,00887131 |
| BE996469  | chr12 | 4247362    | 4248639   | Ncoa1         | 3,021740981 | 0,00154037 | 0,00527283 |
| BC011320  | chr1  | 16655280   | 16668358  | Tmem70        | 3,021175515 | 0,00242191 | 0,00637481 |
| NM_021511 | chr1  | 9535518    | 9537539   | Rrs1          | 3,01775357  | 0,00088658 | 0,00452836 |
| AV104666  | chr2  | 30029263   | 30029563  | Endog         | 3,016028372 | 0,00063169 | 0,00415309 |
| AK019346  | chr16 | 18052952   | 18071725  | Dgcr6         | 3,013197004 | 0,00040419 | 0,00379856 |
| NM_019769 | chr16 | 32408620   | 32411185  | 1500003003Rik | 3,01195455  | 0,00285951 | 0,00692629 |
| AK003786  | chr2  | 155967522  | 155969916 | LOC100045796, | 3,009064434 | 0,00089088 | 0,00452836 |
| BB316456  | chr17 | 73198935   | 73199783  | Ypel5         | 3,007292091 | 0,00079918 | 0,00442254 |
| AB030038  | chr3  | 96962697   | 96980499  | Acp6          | 3,003646434 | 0,00274789 | 0,00679144 |
| AI836168  | chr4  | 154270307  | 154273152 | 2810405K02Rik | 3,001242722 | 0,00483144 | 0,00897474 |
| BB554029  | chr1  | 171879665  | 171879945 | Hsd17b7       | 3,00082669  | 0,00429198 | 0,00841064 |
| AW108044  | chr7  | 107647765  | 107648134 | Ucp2          | 2,99453086  | 0,00490175 | 0,00905991 |
| BC025858  | chr15 | 85637401   | 85641479  | 2210021J22Rik | 2,982536927 | 0,00577315 | 0,00991503 |
| AK014530  | chr5  | 30559212   | 30595519  | Ept1          | 2,971229409 | 0,00415508 | 0,00827777 |
| NM_133201 | chr4  | 147247707  | 147277608 | Mfn2          | 2,967894892 | 0,00043149 | 0,00383219 |
| NM_008591 | chr6  | 17413826   | 17521997  | Met           | 2,964800439 | 0,00255419 | 0,00652903 |
| BC026831  | chr19 | 10257392   | 10271364  | Fads1         | 2,964523021 | 0,00095733 | 0,00457829 |
| BC009118  | chr8  | 63966530   | 63982281  | Cbr4          | 2,964153171 | 0,0009277  | 0,00453527 |
| BG228878  | chr3  | 41548605   | 41560077  | D3Erttd751e   | 2,961914509 | 0,00232476 | 0,00629252 |
| BF660283  | chr19 | 36532862   | 36535460  | Pcgf5         | 2,959533936 | 0,00066532 | 0,00419404 |
| AB045132  | chr14 | 56097633   | 56109177  | Dhrs4         | 2,956755604 | 0,00109252 | 0,00476387 |
| AV092283  | chr7  | 87653105   | 87653273  | Ndufab1       | 2,954327983 | 6,01E-05   | 0,00294864 |
| AK002387  | chr19 | 36486445   | 36531002  | Pcgf5         | 2,953887743 | 0,00318233 | 0,00718159 |
| AV148646  | NA    | NA         | NA        | Acac2         | 2,951585227 | 0,00198691 | 0,0058673  |
| BB318357  | NA    | NA         | NA        |               | 2,94857931  | 0,00354625 | 0,00762443 |
| NM_133666 | chr19 | 4007499    | 4012711   | Ndufv1        | 2,946383044 | 0,00026445 | 0,0033347  |

|           |       |           |           |                |             |            |            |
|-----------|-------|-----------|-----------|----------------|-------------|------------|------------|
| BB035890  | chr14 | 101861788 | 101900325 | Tbc1d4         | 2,944116989 | 0,00296026 | 0,00701521 |
| NM_010911 | chr2  | 155949384 | 155969923 | Nfs1           | 2,942821425 | 0,00542747 | 0,00956334 |
| NM_023041 | chr1  | 174056894 | 174065912 | Pex19          | 2,941811893 | 0,0049218  | 0,00907658 |
| BI739053  | chr8  | 63389196  | 63398342  | Clcn3          | 2,939569729 | 0,00114908 | 0,00486872 |
| BF780381  | chr5  | 149268413 | 149269014 | Immt           | 2,936647292 | 0,00209944 | 0,00602237 |
| AV101079  | chr15 | 83404370  | 83404631  | Tspo           | 2,936555694 | 0,00052687 | 0,00398232 |
| BC027267  | chr3  | 37303903  | 37318518  | Nudt6          | 2,931004128 | 0,00179258 | 0,00557676 |
| BB549252  | chr3  | 95543884  | 95544161  | Tars2          | 2,9089127   | 0,00586328 | 0,00998343 |
| BC016238  | chr4  | 102986423 | 103039039 | Oma1           | 2,908438907 | 0,00556871 | 0,00970359 |
| BC011344  | chr9  | 48303368  | 48304077  | Gm5617         | 2,906776202 | 0,00531408 | 0,00945679 |
| BC019373  | chr8  | 108674258 | 108688615 | Pla2g15        | 2,903383206 | 0,00085759 | 0,00447452 |
| W41078    | chr6  | 91390997  | 91391749  | 1810044D09Rik  | 2,903373143 | 0,00464787 | 0,00877825 |
| AK017405  | chr8  | 18801607  | 18803188  | Mcph1          | 2,901361376 | 0,00046726 | 0,00387701 |
| BG973910  | chr6  | 113416139 | 113420752 | Il17re         | 2,899933867 | 1,14E-05   | 0,00204316 |
| AK011540  | chr3  | 95543898  | 95558785  | Tars2          | 2,897321939 | 0,00101989 | 0,00466253 |
| BC026775  | chr19 | 43827502  | 43843128  | Cutc           | 2,887578165 | 0,00073798 | 0,00430009 |
| AI596377  | chr12 | 4368566   | 4369153   |                | 2,884907376 | 0,00073332 | 0,00428641 |
| NM_011891 | chr11 | 46792284  | 47193024  | Sgcd           | 2,878316022 | 0,00493946 | 0,00909459 |
| AU040849  | chr3  | 41562168  | 41563311  | D3ErtD751e     | 2,875713598 | 0,00061514 | 0,00410983 |
| D11089    | chr18 | 35097064  | 35114004  | Hspa9          | 2,874199094 | 7,08E-05   | 0,00304496 |
| BI076834  |       | NA        | NA        | 1200003I10Rik, | 2,862607754 | 0,00248443 | 0,00644613 |
| AV304745  | chr1  | 9537213   | 9537534   | Rrs1           | 2,862538308 | 0,00117068 | 0,00487257 |
| NM_134420 | chr9  | 108756362 | 108815381 | Slc26a6        | 2,86240934  | 0,00272368 | 0,00677489 |
| NM_053014 | chr10 | 77736355  | 77760923  | Agpat3         | 2,861744753 | 0,00434055 | 0,00844953 |
| BB335028  | chr4  | 119202923 | 119203692 | AA415398       | 2,859335681 | 0,00541458 | 0,00955142 |
| AB052834  | chr11 | 82690986  | 82704103  | Rad51l3        | 2,85918704  | 0,00421019 | 0,00833924 |
| NM_010517 | chr11 | 98902738  | 98913547  | Igfbp4         | 2,853356482 | 0,00499234 | 0,00914456 |
| BC014714  | chr3  | 98084363  | 98114661  | Hmgcs2         | 2,850391329 | 0,00112691 | 0,00482125 |
| AK002609  | chr13 | 43460976  | 43490571  | Sirt5          | 2,848406401 | 0,00108443 | 0,00475246 |
| AK008764  | chr5  | 36004207  | 36014025  | Htra3          | 2,848297813 | 0,00580564 | 0,00994043 |
| NM_024208 | chr2  | 6109510   | 6134079   | Echdc3         | 2,847547682 | 0,00159576 | 0,00532286 |
| NM_007625 | chr11 | 118941470 | 118947551 | Cbx4           | 2,846422856 | 0,00404807 | 0,00813171 |
| BB795103  | chr19 | 7610662   | 7613098   | Ati3           | 2,838846809 | 0,00107704 | 0,00474399 |
| BG070487  | chr9  | 53389450  | 53418455  | Acat1          | 2,838531989 | 0,00323408 | 0,00724554 |
| AW228218  | chr19 | 4007499   | 4007893   | Ndufv1         | 2,832498123 | 0,00077815 | 0,00438329 |
| NM_009640 | chr15 | 42257989  | 42508517  | Angpt1         | 2,832409774 | 0,00266847 | 0,00669471 |
| BC009068  | chr9  | 57392069  | 57400558  | Mpi            | 2,831791409 | 0,00232836 | 0,00629252 |
| BG919998  | chr2  | 68048501  | 68310055  | Stk39          | 2,82976059  | 0,00113244 | 0,00483356 |
| AW049748  | chr2  | 134611913 | 135298158 | Plcb1          | 2,827672427 | 0,00099817 | 0,00461114 |
| AK010307  | chr7  | 87652664  | 87653289  | Ndufab1        | 2,825615183 | 0,00047927 | 0,00388445 |
| BG069296  | chr13 | 15742687  | 15743372  | Syde2          | 2,816337047 | 0,00099588 | 0,00461114 |
| BB308547  | chr18 | 61556049  | 61556712  |                | 2,810798434 | 0,00299937 | 0,00703362 |
| AK002682  | chr2  | 108932456 | 109118447 | Mett5d1        | 2,809522589 | 1,39E-06   | 0,00089557 |
| AK014460  | chr8  | 10924439  | 10928457  | 3930402G23Rik  | 2,804250055 | 0,00586332 | 0,00998343 |
| BB122084  | chr3  | 104667994 | 104729827 | St7l           | 2,801316515 | 0,00501275 | 0,00917091 |
| AW553649  | chr3  | 137752816 | 137794338 | Mtpp           | 2,800840833 | 0,00470907 | 0,00885346 |
| BC003903  | chr10 | 75236863  | 75244159  | Gstt3          | 2,800782592 | 0,00490753 | 0,00906486 |
| AK014587  | chr18 | 33361065  | 33363838  | Stard4         | 2,798987415 | 0,00186889 | 0,00570387 |
| NM_009708 | chr11 | 101330246 | 101333167 | Rnd2           | 2,790492947 | 0,00050165 | 0,00393263 |
| BB046613  | chr6  | 133061624 | 133062319 | 2700089E24Rik  | 2,787351605 | 0,00371595 | 0,00779821 |
| AI323572  | chr10 | 76512800  | 76513177  | Slc19a1        | 2,78652095  | 0,00241428 | 0,00637481 |
| BI135190  | chr11 | 115993134 | 115994721 | Mrpl38         | 2,786501635 | 0,00012535 | 0,00307567 |
| BC010826  | chr16 | 36043928  | 36071642  | Fam162a        | 2,780588007 | 0,00015613 | 0,00319851 |
| BI660196  | chr7  | 133920491 | 133924028 | Ypel3          | 2,776476144 | 0,00266192 | 0,00668414 |
| BI437942  | chr13 | 41734516  | 41736724  | Tmem170b       | 2,774975434 | 0,00069891 | 0,00422755 |
| AV298249  | chrX  | 96142331  | 96144355  | Yipf6          | 2,770113329 | 0,00506014 | 0,00922207 |
| BM206023  | chr8  | 3150932   | 3154857   | Insr           | 2,766659311 | 0,00225924 | 0,00621535 |
| AK016905  | chr14 | 17073137  | 17081690  | Oxsm           | 2,765815651 | 0,00363739 | 0,00772652 |
| AK015888  | chr3  | 106350715 | 106376848 | Dram2          | 2,765336413 | 0,00033626 | 0,00358663 |
| AV317245  | chr3  | 40741395  | 40742058  | 3110057O12Rik  | 2,763429869 | 0,00037999 | 0,00368754 |
| AK006931  | chr7  | 146399180 | 146414907 | Lrrc27         | 2,760357259 | 0,00316809 | 0,00718159 |
| BB399925  |       | NA        | NA        | Hsd17b14       | 2,759678109 | 2,69E-05   | 0,00242681 |
| AV377656  | chr10 | 19861541  | 19862113  | Map3k5         | 2,756829415 | 0,0047928  | 0,00894494 |
| AV066880  | chr3  | 51465158  | 51486596  | Mgst2          | 2,75568312  | 0,00382294 | 0,00789885 |
| NM_025560 | chr11 | 120317917 | 120319377 | 1810049H13Rik  | 2,754336833 | 0,00055268 | 0,00403725 |
| BB085063  | chr15 | 84044480  | 84045454  | Samm50         | 2,752304327 | 0,00066214 | 0,00419404 |
| BB206121  | chr4  | 138874112 | 138874331 | Akr7a5         | 2,751169448 | 1,39E-06   | 0,00089557 |
| AF109918  | chr7  | 20286861  | 20300468  | Tomm40         | 2,750606951 | 0,00428825 | 0,00841064 |
| AA960125  | chr7  | 71537697  | 71557006  | Mcee           | 2,741812661 | 0,00173042 | 0,00550189 |
| NM_025591 | chr6  | 86315677  | 86320051  | Fam136a        | 2,741518103 | 0,00108123 | 0,00475125 |
| AK004820  | chr17 | 56753719  | 56766310  | Lonp1          | 2,740767597 | 0,00212086 | 0,00603596 |
| AV155488  | chr5  | 13121303  | 13121534  | Cyca           | 2,738355969 | 0,00102641 | 0,00467753 |
| NM_133626 | chr2  | 143811598 | 143836999 | Rrbp1          | 2,737853023 | 0,00050806 | 0,00394022 |
| AK010138  | chr12 | 32324915  | 32339691  | Dus4l          | 2,730168512 | 0,00022451 | 0,00332788 |
| NM_026508 | chr16 | 4039819   | 4077824   | Trap1          | 2,727652768 | 0,00017221 | 0,00320003 |
| AW546149  | chr18 | 67564417  | 67575265  | Afg3l2         | 2,727038371 | 0,00339477 | 0,00744245 |
| NM_011122 | chr4  | 147283862 | 147310865 | Plod1          | 2,72676643  | 8,99E-05   | 0,00305957 |
| BG067863  | chr16 | 35107683  | 35109261  | Ptplb          | 2,722864141 | 0,00185974 | 0,00568793 |
| BQ175779  | chr16 | 35109565  | 35110146  |                | 2,721750835 | 0,00382998 | 0,00789885 |
| BI794243  | chr10 | 79146903  | 79151687  | Cdc34          | 2,717019651 | 0,00377127 | 0,00784164 |
| NM_133734 | chr14 | 56179825  | 56188902  | Dcaf11         | 2,713575407 | 0,00427119 | 0,00840218 |
| AK018125  | chr3  | 67234043  | 67280451  | Gfm1           | 2,710858857 | 0,00119845 | 0,00491487 |

|           |       |           |           |               |             |            |            |
|-----------|-------|-----------|-----------|---------------|-------------|------------|------------|
| AY046947  | chr14 | 122933555 | 123289166 | Pcca          | 2,710436109 | 0,00132432 | 0,00508982 |
| BB220521  | chr10 | 127951932 | 127952608 | Esyt1         | 2,707657013 | 0,00039136 | 0,00376032 |
| NM_026389 | chr11 | 78325744  | 78336363  | Poldip2       | 2,706953303 | 0,00095191 | 0,00456813 |
| AK003715  | chr11 | 101115068 | 101120860 | Vps25         | 2,705021386 | 0,00046406 | 0,00387701 |
| BG791555  | chr7  | 31106427  | 31107378  | Sdhaf1        | 2,704777765 | 0,00191824 | 0,00576136 |
| NM_026121 | chr8  | 26877238  | 26895678  | Bag4          | 2,704252754 | 0,00325015 | 0,00725648 |
| BB372567  | chr19 | 29686261  | 29722910  | Ermp1         | 2,699000043 | 0,00189517 | 0,00573878 |
| AV292354  | chr7  | 96560051  | 96561643  | 5430421B17    | 2,696391533 | 0,00360958 | 0,0077077  |
| NM_007931 | chr2  | 30027043  | 30029589  | Endog         | 2,69495279  | 0,00098845 | 0,00460391 |
| BC019978  | chr2  | 322790006 | 32279586  | Slc25a25      | 2,692254883 | 0,00368548 | 0,00777151 |
| BC023089  | chr2  | 84838613  | 84875653  | P2rx3         | 2,691247362 | 0,00310469 | 0,00712668 |
| BB041802  | chr6  | 39094286  | 39094551  | Jhdm1d        | 2,690827672 | 0,00226131 | 0,00621535 |
| BC003432  | chr9  | 55302242  | 55360048  | Etfa          | 2,690529267 | 0,00585366 | 0,00998343 |
| BB526541  | chr1  | 141348435 | 141349582 | Zbtb41        | 2,690491968 | 0,00551782 | 0,00964734 |
| U36502    | chr11 | 100721795 | 100746469 | Stat5a        | 2,689634248 | 0,00011741 | 0,00307187 |
| NM_024478 | chr5  | 36807831  | 36814346  | Hsd17b4       | 2,689447823 | 0,00311837 | 0,00713922 |
| BB032410  | chr18 | 50355596  | 50355841  | Grp1          | 2,686606446 | 0,0002653  | 0,0033347  |
| BB336053  | chr5  | 36199775  | 36227626  | Abliim2       | 2,686327128 | 0,00561251 | 0,00974227 |
| AJ404329  | chr11 | 60231167  | 60258773  | 4933439F18Rik | 2,683386747 | 0,00140779 | 0,00516307 |
| BC006806  | chr3  | 89204909  | 89215762  | Flad1         | 2,679966562 | 0,00301029 | 0,00703572 |
| AK014074  | chr18 | 77215887  | 77286025  | Katnal2       | 2,678378774 | 0,0002443  | 0,0033347  |
| BM230523  | chr14 | 35538402  | 35559573  | Wapal         | 2,674306832 | 0,0006321  | 0,00415309 |
| BC019374  | chr9  | 77602348  | 77642295  | Gc1c          | 2,673963922 | 0,00398172 | 0,00805807 |
| BC002280  | chr1  | 95197799  | 95201686  | Mterfd2       | 2,668187404 | 0,00224285 | 0,00619637 |
| AV154001  | chr2  | 127617115 | 127618222 | 1500011K16Rik | 2,668085687 | 0,00497792 | 0,00912725 |
| BB736240  | chr19 | 43809596  | 43810002  | Cox15         | 2,667438484 | 0,00345666 | 0,00753205 |
| AV208528  | chr18 | 23376114  | 23376319  | Gm1788        | 2,667429239 | 0,00331362 | 0,00733195 |
| AK003189  | chr8  | 119505871 | 119507841 | Gcsh          | 2,665590197 | 0,00034838 | 0,00358878 |
| BB771765  | chr4  | 62021739  | 62051050  | Slc31a1       | 2,663420096 | 0,00444262 | 0,00854109 |
| AI157548  | chr5  | 21242964  | 21262970  | Pmpcb         | 2,663217028 | 0,00470186 | 0,00884673 |
| BC003305  | chr8  | 71404452  | 71430831  | Lpl           | 2,660366483 | 0,00049632 | 0,0039286  |
| NM_013763 | chr5  | 135625554 | 135636924 | Tbl2          | 2,658412534 | 0,00422003 | 0,00835115 |
| AK007417  | chr5  | 130384434 | 130387150 | 4930579G22Rik | 2,658301976 | 0,00128417 | 0,00503101 |
| BE995700  | chr8  | 127432482 | 127472857 | Egln1         | 2,65596291  | 0,00377186 | 0,00784164 |
| BB448458  | chr5  | 130227500 | 130228433 |               | 2,651603386 | 0,00188353 | 0,00572535 |
| NM_011517 | chr10 | 87922331  | 87935981  | Sycp3         | 2,651171502 | 0,00065574 | 0,00419404 |
| AV094898  | chr13 | 59670636  | 59671723  | Kat2b         | 2,646021896 | 0,00012835 | 0,00309688 |
| AA823938  | chrX  | 34336970  | 34338795  | Slc25a5       | 2,643886052 | 5,73E-05   | 0,00294864 |
| AK003232  | chr16 | 93683463  | 93691232  | Cbr3          | 2,640561971 | 0,00073863 | 0,00430009 |
| BF585357  | chr13 | 74459701  | 74482386  | Sdha          | 2,639088992 | 0,00084008 | 0,00446825 |
| BG068103  | chr19 | 56986848  | 56989034  | Afap12        | 2,638393958 | 0,00428871 | 0,00841064 |
| BE652876  | chr19 | 10116059  | 10133511  | Fads3         | 2,635880562 | 0,00156332 | 0,00527283 |
| AW553331  | chr16 | 76354444  | 76355110  |               | 2,635003723 | 0,00550925 | 0,00964008 |
| BB297636  | chr16 | 4039973   | 4040407   | Trap1         | 2,630450679 | 0,00163655 | 0,00539343 |
| AK018322  | chr19 | 33212233  | 33466755  | Rnls          | 2,630259241 | 0,00379314 | 0,00787437 |
| NM_008389 | chr4  | 116202275 | 116210847 | Ipp           | 2,629712351 | 0,00487389 | 0,00902981 |
| NM_013560 | chr5  | 136363808 | 136365428 | Hspb1         | 2,627189015 | 0,00281905 | 0,0068743  |
| BC027248  | chr9  | 114640300 | 114658462 | Cmtm6         | 2,623785898 | 0,00195518 | 0,00582205 |
| BG065238  | chr3  | 41417370  | 41420780  | Phf17         | 2,622167781 | 0,00087369 | 0,00451182 |
| NM_009529 | chrX  | 32607392  | 32630306  | Gm10058, Gm1  | 2,61750084  | 0,00041555 | 0,00381145 |
| BB469300  | chr6  | 95078485  | 95079787  | Kbtbd8        | 2,610787433 | 0,00138591 | 0,00512992 |
| AK004244  | chr5  | 135485168 | 135488040 | Abhd11        | 2,608670989 | 0,00146472 | 0,00522449 |
| AW494626  | chr13 | 81888975  | 81889493  | Mblac2        | 2,60673694  | 0,0015048  | 0,00527107 |
| BI456232  | chr11 | 100337672 | 100389244 | Acly          | 2,606465926 | 0,00100417 | 0,00461982 |
| BB728073  | chr1  | 66877194  | 66904129  | Acadl         | 2,600429634 | 7,03E-06   | 0,00179653 |
| BM232561  | chr10 | 77470354  | 77472495  | Pfkl          | 2,599006064 | 0,00508739 | 0,00925232 |
| AV156352  | chr3  | 130926183 | 130927275 | Lef1          | 2,597682304 | 0,00260478 | 0,00660008 |
| BF017016  | chr7  | 35000223  | 35001285  | LOC676974     | 2,595441553 | 0,00398172 | 0,00805807 |
| NM_025650 | chr10 | 79865742  | 79869514  | Uqcr11        | 2,592915156 | 0,00206001 | 0,00597431 |
| AV307240  | chr13 | 81891526  | 81892271  | Mblac2        | 2,591100547 | 0,00032974 | 0,00357125 |
| BB245373  | chr6  | 59302444  | 59303507  | Gprin3        | 2,586632329 | 0,00347317 | 0,00753996 |
| AV040390  | chr10 | 127105459 | 127105738 | 1700012D01Rik | 2,583881665 | 0,00488761 | 0,00904426 |
| BC016193  | chr6  | 72515918  | 72548396  | Elmod3        | 2,579765623 | 0,00016968 | 0,0032003  |
| AW911807  | chr19 | 21465798  | 21467248  | Gda           | 2,578934264 | 0,00446698 | 0,00857273 |
| NM_138601 | chr10 | 77624615  | 77632513  | D10Jhu81e     | 2,577004399 | 0,00209229 | 0,00600979 |
| NM_010699 | chr7  | 54102181  | 54110997  | Ldha          | 2,575647212 | 0,00314684 | 0,00716661 |
| BC027007  | chr17 | 37095536  | 37102567  | Znrdr1as      | 2,574906418 | 0,00427289 | 0,00840218 |
| BC027558  | chr3  | 96000715  | 96002412  | Bola1         | 2,574371037 | 0,00572522 | 0,00985519 |
| NM_008896 | chr6  | 5214623   | 5248390   | Pon2          | 2,572783394 | 0,00396266 | 0,0080495  |
| AV103412  | chr14 | 31386595  | 31386799  | Tkt           | 2,571268021 | 0,00440824 | 0,00851267 |
| BC025172  | chr15 | 76845916  | 76881098  | Mb            | 2,566967446 | 0,00079198 | 0,00441565 |
| AK013149  | chr9  | 106097237 | 106101595 | Ppm1m         | 2,565179886 | 0,00153445 | 0,00527283 |
| BB494388  | chr15 | 83377226  | 83386126  | Mcat          | 2,56475319  | 0,00053948 | 0,00401508 |
| BG064477  | chrX  | 20095158  | 20097063  | Phf16         | 2,558928789 | 0,00508016 | 0,00924692 |
| NM_012029 | chr9  | 21876689  | 21888655  | Ecsit         | 2,558831237 | 0,00394282 | 0,00803175 |
| NM_025570 | chr4  | 155177709 | 155182940 | Mrlp20        | 2,554870205 | 0,00153471 | 0,00527283 |
| AA038464  | chr10 | 75400121  | 75400491  | Chchd10       | 2,554560316 | 0,00010455 | 0,00305957 |
| BB308952  | chr16 | 43641979  | 43642717  | Zbtb20        | 2,553869842 | 0,00363971 | 0,00772652 |
| BB777713  | chr6  | 5213209   | 5215354   | Pon2          | 2,55340078  | 0,00142817 | 0,00519821 |
| BC005562  | chr5  | 67651897  | 67677768  | Tmem33        | 2,552224079 | 0,0051166  | 0,00927242 |
| NM_025307 | chr10 | 66729436  | 66748053  | Nrbf2         | 2,551985267 | 0,00152937 | 0,00527283 |
| BB755506  | chr7  | 31337571  | 31340462  | Hspb6         | 2,549227272 | 0,00339378 | 0,00744245 |

|           |       |           |           |                  |             |            |            |
|-----------|-------|-----------|-----------|------------------|-------------|------------|------------|
| AK003046  | chr13 | 36817493  | 36826342  | Nrn1             | 2,545598693 | 0,00105893 | 0,0047024  |
| AF098949  | chr7  | 125668575 | 125676827 | Coq7             | 2,541807898 | 0,00104005 | 0,00470106 |
| NM_133900 | chr5  | 130271435 | 130293113 | Sph              | 2,53804034  | 0,00011038 | 0,00305957 |
| NM_009012 | chr11 | 53462931  | 53520819  | Rad50            | 2,537662133 | 0,00513616 | 0,00929431 |
| BB223744  | chr9  | 26781719  | 26807128  | Acad8            | 2,536308085 | 0,00067471 | 0,00422116 |
| NM_019744 | chr12 | 120499420 | 120502748 | Gm6768, Ncoa4    | 2,53542922  | 0,00523995 | 0,00939213 |
| NM_023483 | chr9  | 50571804  | 50576557  | 1110032A03Rik    | 2,532987575 | 0,00137949 | 0,00512992 |
| BG072151  | chr12 | 79638749  | 79639457  |                  | 2,531811506 | 0,0025834  | 0,00658434 |
| BG144467  | chr10 | 87909019  | 87910069  | Gnptab           | 2,529522374 | 1,56E-05   | 0,00209344 |
| BC005606  | chr5  | 114894288 | 114910600 | Mvk              | 2,526569735 | 0,00145406 | 0,00522274 |
| BE944732  | chr10 | 87899185  | 87909305  | Gnptab           | 2,525904335 | 0,00509745 | 0,00925812 |
| BC026973  | chr2  | 30139380  | 30141864  | Dolk             | 2,525125338 | 0,00198999 | 0,0058673  |
| BC006048  | chr1  | 177531215 | 177555723 | Fh1              | 2,525055328 | 0,00469648 | 0,00884126 |
| AI428127  | chr7  | 128730900 | 128732856 | 4933432K03Rik    | 2,52343688  | 0,00213381 | 0,00604917 |
| BB667395  | chr2  | 5817142   | 5818233   | Dhtkd1           | 2,522693616 | 0,00134037 | 0,00510593 |
| AF273691  | chr2  | 143811601 | 143836920 | Rrbp1            | 2,521845689 | 0,00100558 | 0,00462141 |
| AV377318  | chr5  | 130460742 | 130462562 | Vkorc1l1         | 2,519024232 | 0,004805   | 0,00894796 |
| BC003292  | chrX  | 45828120  | 45866740  | Aifm1            | 2,517872099 | 0,00586409 | 0,00998343 |
| NM_023587 | chr16 | 35022513  | 35106663  | Ptplb            | 2,517627775 | 0,00014163 | 0,00315752 |
| BG060909  | chr19 | 44368522  | 44381347  | Scd2             | 2,51374795  | 0,00158104 | 0,00529412 |
| AK003088  | chr6  | 30589396  | 30595361  | Cpa1             | 2,512659188 | 0,00213609 | 0,00604917 |
| NM_026527 | chr11 | 30876650  | 30886347  | Chac2            | 2,512145456 | 0,00044016 | 0,00383854 |
| BB229589  | chr19 | 29038409  | 29041294  | Ppapdc2          | 2,51006548  | 0,00035712 | 0,00361968 |
| AY028963  | chr16 | 43510420  | 43619182  | Zbtb20           | 2,509604463 | 0,00428103 | 0,0084091  |
| BB458460  | chr6  | 89333145  | 89333327  | Chchd6           | 2,505233368 | 0,00038039 | 0,00368754 |
| NM_007620 | chr16 | 93608083  | 93610587  | Chr1             | 2,504000076 | 0,00393944 | 0,00803102 |
| AV310010  | chr15 | 57701056  | 57702283  | Der1             | 2,502985616 | 0,00309583 | 0,00711854 |
| BB453314  | chr15 | 42256212  | 42257118  | Angpt1           | 2,501780124 | 0,00158059 | 0,00529412 |
| BB008667  | chr7  | 126999266 | 127000202 | Dcun1d3          | 2,499085049 | 0,00164669 | 0,0054015  |
| AK002544  | chr2  | 30247935  | 30256049  | Dolpp1           | 2,495328927 | 0,00580678 | 0,00994043 |
| NM_007408 | chr4  | 86302467  | 86315939  | Plin2            | 2,494628525 | 0,00027661 | 0,00335239 |
| AF329969  | chr4  | 151490042 | 151494228 | Tnfrsf25         | 2,49306414  | 0,00289666 | 0,00695193 |
| NM_009572 | chr15 | 57878857  | 57908044  | Zhx1             | 2,492779026 | 0,00503205 | 0,00919402 |
| BB727537  | chr9  | 114808458 | 114843017 | Gpd1l            | 2,491992973 | 0,00072246 | 0,0042683  |
| NM_019703 | chr13 | 6580417   | 6647978   | Pfkip            | 2,491034496 | 8,67E-05   | 0,00305957 |
| BC026495  | chr11 | 22915652  | 22923731  | Fam161a          | 2,488195769 | 0,00509494 | 0,00925812 |
| AK018482  | chr9  | 77943319  | 77956411  | Fbxo9            | 2,488066421 | 0,00532113 | 0,00945679 |
| BE991737  | chr12 | 102321978 | 102326389 | LOC100504016     | 2,486997401 | 0,00224449 | 0,00619639 |
| BB068040  | chr8  | 88051217  | 88051458  | Gpt2             | 2,48454212  | 0,00387552 | 0,00795744 |
| D87965    | chr6  | 128178201 | 128251313 | Tead4            | 2,481426977 | 0,00484903 | 0,00899225 |
| BB276877  | chr11 | 100337666 | 100337914 | Acly             | 2,480051363 | 0,00540629 | 0,00954452 |
| AJ224740  | chr10 | 94637898  | 94786601  | Cradd            | 2,470940036 | 0,00537255 | 0,00950041 |
| AV324744  | chr5  | 114894295 | 114903205 | Mvk              | 2,469287809 | 0,00292432 | 0,00699356 |
| AY029255  | chr11 | 87793033  | 87801020  | Dynll2           | 2,461913375 | 0,0029892  | 0,0070317  |
| BG064890  | chr4  | 24825240  | 24829607  | Ndufaf4          | 2,458954432 | 0,0017592  | 0,00552837 |
| BB221842  | chr3  | 144349874 | 144383296 | Sh3glb1          | 2,457361318 | 0,00123901 | 0,00497083 |
| BF300229  | chr6  | 49023849  | 49034715  | 2410003K15Rik    | 2,453506341 | 0,00240659 | 0,00636218 |
| NM_019781 | chr4  | 148334643 | 148473931 | Pex14            | 2,451823284 | 0,00194065 | 0,00579658 |
| NM_010497 | chr1  | 65205195  | 65225690  | Idh1             | 2,450251774 | 0,0028439  | 0,00690775 |
| NM_007837 | chr10 | 126727829 | 126733344 | Ddit3            | 2,449682881 | 0,0016405  | 0,0053975  |
| BB835379  | chr3  | 137805757 | 137806625 | C230076A16Rik    | 2,44732381  | 0,00385614 | 0,00793332 |
| AF349659  | chr6  | 89593981  | 89625523  | Txnrd3           | 2,445119541 | 0,00245336 | 0,00641784 |
| BC023146  | chr13 | 34129468  | 34165940  | Bph1             | 2,444119798 | 0,00534018 | 0,00947312 |
| AV047320  | chr5  | 21254654  | 21262972  | Pmpcb            | 2,44213     | 0,00360584 | 0,00770677 |
| AF053352  | chr7  | 107621499 | 107635243 | Ucp3             | 2,434364162 | 0,00019096 | 0,00322705 |
| NM_007898 | chrX  | 7762450   | 7770638   | Ebp              | 2,433655568 | 0,00361337 | 0,0077077  |
| BB815335  | chr8  | 41597152  | 41631953  | Vps37a           | 2,431278227 | 0,00035022 | 0,00358878 |
| BB278418  | chr19 | 46836090  | 46953282  | Cnm2             | 2,429997787 | 0,00095092 | 0,00456813 |
| BB703945  | chr18 | 38746101  | 38746679  | Spry4            | 2,428473932 | 0,00419726 | 0,00832602 |
| AV171622  | chr15 | 100135191 | 100144786 | Higd1c, Mettl7a1 | 2,42654733  | 0,00098017 | 0,00460358 |
| BC006937  | chr5  | 73684041  | 73700604  | Ociad1           | 2,426101653 | 0,00061764 | 0,00410983 |
| BB204225  | chr16 | 16309450  | 16309725  | Yars2            | 2,425681278 | 0,00222172 | 0,00617431 |
| NM_025962 | chr4  | 116374881 | 116381011 | Mmachc           | 2,422681916 | 0,00060525 | 0,00410983 |
| NM_134011 | chr11 | 6515601   | 6526069   | LOC100046166,    | 2,421481532 | 0,00462714 | 0,00875246 |
| BC022589  | chr12 | 86114226  | 86116038  | Isca2            | 2,421246561 | 0,004682   | 0,00882079 |
| BC019200  | chr1  | 137159293 | 137180626 | Rnpep            | 2,421179431 | 0,00030974 | 0,00346094 |
| BB703735  | chr12 | 60230759  | 60291207  | Ctage5           | 2,420508231 | 0,00026478 | 0,0033347  |
| BC026638  | chr11 | 50038857  | 50048607  | Mgat4b           | 2,417222037 | 0,00011378 | 0,00305957 |
| NM_010798 | chr3  | 91828409  | 91828971  | Mif              | 2,412660635 | 0,00316001 | 0,00718159 |
| AV090328  | chr5  | 89088153  | 89104691  | Grsf1            | 2,410997241 | 0,00081904 | 0,00446825 |
| BM246706  | chr2  | 132358458 | 132359169 | Gpcpd1           | 2,410930395 | 0,0048527  | 0,00899499 |
| AW049055  | chr7  | 104455988 | 104456769 | Gab2             | 2,407999346 | 0,0056251  | 0,00975241 |
| BC013506  | chr10 | 43244926  | 43260793  | 1700021F05Rik    | 2,40263917  | 0,00017612 | 0,0032003  |
| BB040841  |       | NA        | NA        | Kif13a           | 2,401273945 | 0,0003173  | 0,00349756 |
| BG071386  |       | NA        | NA        |                  | 2,399127782 | 0,00394794 | 0,00803651 |
| NM211104  | chr10 | 126733277 | 126734988 | Mars             | 2,398745334 | 0,00037448 | 0,00368458 |
| NM_025363 | chr6  | 38484822  | 38489449  | 1110001J03Rik    | 2,397382321 | 0,00400962 | 0,0080919  |
| AK020571  | chr7  | 133792056 | 133793073 |                  | 2,394841208 | 0,00389619 | 0,00798543 |
| BB139935  | chr11 | 6516422   | 6516716   | LOC100046166,    | 2,394459444 | 0,00200384 | 0,00589613 |
| AV304074  | chr6  | 146991285 | 147019425 | Mrps35           | 2,394251989 | 1,51E-05   | 0,00209344 |
| NM_008292 | chr18 | 50287854  | 50355920  | Hsd17b4          | 2,390462875 | 0,00023903 | 0,0033347  |
| AK019474  | chr7  | 139427462 | 139508911 | Chst15           | 2,390355176 | 0,0034743  | 0,00753996 |

|           |       |           |           |               |             |            |            |
|-----------|-------|-----------|-----------|---------------|-------------|------------|------------|
| BC008527  | chr4  | 99602039  | 99659899  | Pgm2          | 2,382985214 | 0,00126308 | 0,00500052 |
| NM_010926 | chr8  | 123181731 | 123192473 | Cox4nb        | 2,374674871 | 0,00143066 | 0,00519946 |
| BC021304  | chr1  | 4763286   | 4775812   | Mrpl15        | 2,371368716 | 0,00582446 | 0,00995499 |
| AK004932  | chr15 | 76526960  | 76530104  | Gpt           | 2,369569539 | 0,00118192 | 0,00489188 |
| NM_030686 | chr14 | 56097693  | 56106408  | Dhrs4         | 2,360651379 | 0,00276302 | 0,00681032 |
| BF783030  | chr7  | 96552901  | 96558802  | Fzd4          | 2,359596215 | 0,00576761 | 0,00991245 |
| NM_025324 | chr7  | 4967106   | 4970090   | Zfp524        | 2,359579859 | 0,0034648  | 0,00753889 |
| AW018348  | chr11 | 62271788  | 62272948  | Pigl          | 2,357544495 | 0,00250245 | 0,0064624  |
| NM_030250 | chr10 | 52137374  | 52156838  | Nus1          | 2,356654065 | 0,00334334 | 0,00737062 |
| BB734748  | chr7  | 117115699 | 117116650 | Tmem41b       | 2,356482553 | 0,00338491 | 0,00742833 |
| AF321301  | chr5  | 109123286 | 109135950 | Fgfr11        | 2,35244338  | 0,00237478 | 0,00634084 |
| NM_010726 | chr2  | 4840075   | 4859782   | Phyh          | 2,35109038  | 0,00274825 | 0,00679144 |
| BC025825  | chr2  | 131059840 | 131073761 | Mavs          | 2,350642269 | 0,00319109 | 0,00718159 |
| BB381813  | chrX  | 68617964  | 68672368  | Mtmr1         | 2,346531781 | 0,00090478 | 0,00453233 |
| BC026557  | chr7  | 104698849 | 104713813 | 1810020D17Rik | 2,345743065 | 0,00268497 | 0,00670934 |
| BB138330  | chr6  | 54873942  | 54893447  | Nod1          | 2,342696398 | 0,00228212 | 0,00624279 |
| BQ174376  | chr16 | 43636812  | 43639620  | Zbtb20        | 2,338243213 | 0,00133989 | 0,00510593 |
| AF199010  | chr6  | 50060247  | 50148579  | Mpp6          | 2,337343872 | 0,00548696 | 0,00961792 |
| AK009249  | chr4  | 95246185  | 95593628  | Fggy          | 2,336582538 | 0,00281194 | 0,00686486 |
| AV097965  | chr7  | 133633984 | 133634237 | Tufm          | 2,335861929 | 0,00542796 | 0,00956334 |
| AV026976  | chr14 | 66772098  | 66790949  | Ptk2b         | 2,331534859 | 0,00240419 | 0,00636218 |
| BF303057  | chr2  | 92243802  | 92274200  | Cry2          | 2,330258492 | 0,0021516  | 0,00607172 |
| AF411816  | chr2  | 121220092 | 121239355 | Catsper2      | 2,328934395 | 0,0019842  | 0,0058673  |
| BB515151  | chr11 | 3817195   | 3817475   | Tcn2          | 2,327119022 | 0,00404029 | 0,00812737 |
| NM_025427 | chr14 | 79688556  | 79701640  | 1190002H23Rik | 2,31377728  | 0,00273185 | 0,00678555 |
| BC013503  | chr10 | 79712196  | 79719538  | Ndufs7        | 2,310956334 | 0,00562127 | 0,00975144 |
| BC024518  | chr11 | 4601975   | 4604329   | Uqc10         | 2,310940316 | 0,00418171 | 0,00830794 |
| NM_134105 | chr16 | 11075003  | 11088097  | Txndc11       | 2,309283025 | 0,00542238 | 0,00956127 |
| BF466063  | chr10 | 61158261  | 61165515  | Tysnd1        | 2,308498828 | 0,00139686 | 0,00514117 |
| AK007939  | chr8  | 128949147 | 128952020 | 1810063B05Rik | 2,307818873 | 0,00175665 | 0,00552837 |
| AJ277212  | chr14 | 31692385  | 31694796  | Mustn1        | 2,304637748 | 0,00388671 | 0,00796977 |
| NM_025797 | chr18 | 85020729  | 85049258  | Cyb5          | 2,303567703 | 0,00026027 | 0,00333347 |
| AK003780  | chr1  | 73956806  | 73959532  | Tns1          | 2,302003457 | 0,0001905  | 0,00322705 |
| BB753323  | chr4  | 154441165 | 154446512 | Pex10         | 2,301197806 | 0,00014177 | 0,00315752 |
| BC012697  | chr7  | 107641877 | 107648134 | Ucp2          | 2,296990675 | 0,00148899 | 0,00526086 |
| NM_011498 | chr6  | 108610636 | 108616917 | Bhlhe40       | 2,296306152 | 0,00416229 | 0,00828831 |
| AV235115  | chr3  | 35964977  | 35990838  | Acad9         | 2,294858181 | 0,00252885 | 0,00649272 |
| AW551910  | NA    | NA        | NA        | NA            | 2,294349222 | 0,00024297 | 0,00333347 |
| AK013127  | chr7  | 107307786 | 107309859 | Lipt2         | 2,289559409 | 0,00477354 | 0,00892061 |
| AK008165  | chr2  | 30040645  | 30061365  | Ccbl1         | 2,289551474 | 0,00111798 | 0,00480623 |
| NM_015791 | chr8  | 59029910  | 59071185  | Fbxo8         | 2,289075424 | 0,00470346 | 0,00884673 |
| C78203    | chr1  | 75195133  | 75195955  | Ankzf1        | 2,285658711 | 0,00232228 | 0,00629252 |
| BI150320  | chr4  | 109124825 | 109149280 | Rnf11         | 2,284106626 | 0,00454003 | 0,00864417 |
| BC019967  | chr2  | 25354224  | 25356252  | C8g           | 2,281867465 | 0,00455505 | 0,00866149 |
| NM_133825 | chr1  | 99540481  | 99558542  | D1Erttd622e   | 2,281543246 | 0,00058933 | 0,00410983 |
| BC027270  | chr11 | 58206179  | 58207074  | Ndufs3        | 2,281274416 | 0,00228605 | 0,00624279 |
| NM_019822 | chr2  | 179906241 | 179910990 | Adrm1         | 2,279472493 | 0,00373567 | 0,00782373 |
| NM_033174 | chr7  | 67132296  | 67144301  | Snrpn, Snurf  | 2,277624631 | 0,00029579 | 0,00345047 |
| BC021390  | chr9  | 103152856 | 103190636 | 1300017J02Rik | 2,277277337 | 0,000151   | 0,00527107 |
| BB314772  | chr5  | 89088479  | 89088837  | Grsf1         | 2,275115834 | 0,00104892 | 0,00470106 |
| AV369982  | chr11 | 63777393  | 63777640  | Cox10         | 2,274808342 | 0,00387588 | 0,00795744 |
| C79823    | chr11 | 97177161  | 97190425  | Mrpl45        | 2,269571596 | 0,00433722 | 0,00844953 |
| AI788952  | chr1  | 65205432  | 65205908  | Irdh1         | 2,268966015 | 0,00163706 | 0,00539343 |
| BG868960  | chrX  | 34413894  | 34424221  | Ube2a         | 2,268879516 | 0,00152318 | 0,00527107 |
| BC004037  | chr5  | 114582001 | 114589325 | Ung           | 2,268046156 | 0,00301161 | 0,00703572 |
| BI692487  | chr7  | 50699463  | 50713155  | Etfb          | 2,267818214 | 0,00016486 | 0,0032003  |
| AK019929  | chrX  | 155897056 | 155924555 | Mtap7d2       | 2,262338802 | 0,00344126 | 0,00751403 |
| NM_026187 | chr1  | 75188708  | 75195982  | Ankzf1        | 2,260128814 | 0,00441907 | 0,00852221 |
| U27316    | chr5  | 97693770  | 97695023  | Slc25a5       | 2,257326335 | 0,00316197 | 0,00718159 |
| AY033912  | chr15 | 102007428 | 102019474 | Csad          | 2,254902416 | 0,00059658 | 0,00410983 |
| BB015377  | chr13 | 25084448  | 25110465  | Mrs2          | 2,254277311 | 0,00586168 | 0,00998343 |
| BC019937  | chr4  | 116924555 | 116941486 | Tmem53        | 2,254253873 | 0,001459   | 0,00522378 |
| AK010469  | chr1  | 31672165  | 31673704  | Paox          | 2,25193471  | 0,0015636  | 0,00527283 |
| AK013580  | chr5  | 108337981 | 108416076 | Fam69a        | 2,249111212 | 0,00179838 | 0,00559036 |
| BC018422  | chr2  | 119481180 | 119488563 | Ndufaf1       | 2,246197836 | 0,00280523 | 0,00686486 |
| BB040330  | chr2  | 144096639 | 144106965 | 8430406I07Rik | 2,243505934 | 0,00228911 | 0,00624279 |
| AI843639  | chr18 | 56934801  | 56935269  |               | 2,242440957 | 0,00278101 | 0,00683914 |
| BB025778  | chr1  | 194994242 | 195002756 | A130010J15Rik | 2,241990244 | 0,0053463  | 0,00947372 |
| BB203106  | chr5  | 76639925  | 76733858  | Clock         | 2,24160177  | 0,00317645 | 0,00718159 |
| AK017901  | chr17 | 87055374  | 87057259  | Prkce         | 2,239311145 | 0,00062124 | 0,00411742 |
| AK004034  | chr19 | 11844867  | 11849434  | Mrpl16        | 2,239303384 | 0,00146113 | 0,00522449 |
| BC026847  | chr13 | 58277520  | 58316997  | Ubqln1        | 2,238511919 | 0,00026731 | 0,00333347 |
| BI692446  | chr7  | 133632919 | 133634245 | Tufm          | 2,229182913 | 0,00300342 | 0,00703551 |
| NM_031196 | chr10 | 76495958  | 76513171  | Slc19a1       | 2,227839036 | 0,00391296 | 0,00800471 |
| AI594880  | chr6  | 125142182 | 125145215 | Mrpl51        | 2,22607932  | 3,76E-07   | 0,0008108  |
| AV011848  | chr11 | 21457245  | 21457571  | Mdh1          | 2,225493057 | 0,00190725 | 0,00574242 |
| AK012103  | chr2  | 93872850  | 93998080  | Hsd17b12      | 2,223789143 | 0,0002856  | 0,00338898 |
| NM_008479 | chr6  | 124854377 | 124861723 | Lag3          | 2,221924815 | 0,00375536 | 0,00782998 |
| NM_134118 | chr8  | 86095596  | 86118366  | Tecr          | 2,218608332 | 8,56E-06   | 0,0018591  |
| U95030    | chr16 | 52250638  | 52453108  | Alcam         | 2,217985602 | 0,00093011 | 0,00453527 |
| BI966456  | chrX  | 139720218 | 139720664 | Chrdl1        | 2,217516747 | 0,00356854 | 0,00764965 |
| NM_016685 | chr8  | 72897449  | 72905965  | Comp          | 2,217401147 | 0,00259467 | 0,00658601 |

|           |       |           |           |               |             |            |            |
|-----------|-------|-----------|-----------|---------------|-------------|------------|------------|
| NM_133952 | chr7  | 87470180  | 87485105  | Unc45a        | 2,215726789 | 0,00367519 | 0,00777151 |
| NM_018737 | chrX  | 159340115 | 159469264 | Ctps2         | 2,214160801 | 0,00347571 | 0,00753996 |
| BC011343  | chr15 | 63762177  | 63891997  | Fam49b        | 2,21275696  | 0,00429537 | 0,00841064 |
| BI455861  | chr14 | 8912876   | 8924467   | Rpp14         | 2,206829238 | 0,00520095 | 0,00936473 |
| NM_010635 | chr8  | 87425826  | 87429193  | Klf1          | 2,205147256 | 0,00411557 | 0,00822005 |
| BB553400  | chr4  | 58848943  | 58882351  | AI314180      | 2,202397687 | 0,00528126 | 0,00941806 |
| NM_019879 | chr6  | 73198375  | 73226901  | Suclg1        | 2,200551293 | 0,00072467 | 0,0042683  |
| NM_007953 | chr19 | 6985466   | 6994890   | Esrra         | 2,200543666 | 1,94E-05   | 0,0021404  |
| BC005518  | chr1  | 82335626  | 82441939  | Rhbdd1        | 2,200406394 | 0,00562845 | 0,00975434 |
| BI437883  | chr11 | 78075255  | 78081909  | 2610507B11Rik | 2,200093749 | 0,00262957 | 0,00663966 |
| BQ032508  | chr5  | 111093394 | 111120805 | Ep400         | 0,454338668 | 0,00310195 | 0,00712668 |
| AK004737  | chr1  | 134212726 | 134230043 | Nuak2         | 0,453781595 | 0,00151243 | 0,00527107 |
| BG917242  | chr13 | 94963217  | 94965365  | Lhfp12        | 0,453720264 | 0,00438328 | 0,00848996 |
| NM_080555 | chr4  | 104829951 | 104904012 | Ppap2b        | 0,45325505  | 0,00218225 | 0,00611058 |
| BE980029  | chr17 | 56551849  | 56615804  | Ptprs         | 0,452928429 | 0,00140039 | 0,0051498  |
| NM_008094 | chr3  | 89006849  | 89012594  | Gba           | 0,45172761  | 0,00352177 | 0,00758684 |
| D45203    | chr18 | 33596672  | 33623075  | D0H4S114      | 0,451616468 | 0,00436641 | 0,00846954 |
| NM_024198 | chr4  | 108072994 | 108079319 | Gpx7          | 0,451072113 | 0,00278007 | 0,00683914 |
| BB120903  | chr4  | 21802736  | 21803646  | Sfrs18        | 0,450864242 | 0,0027491  | 0,00679144 |
| AW558066  | chr7  | 108018260 | 108018868 | Arhgef17      | 0,450581504 | 0,00455511 | 0,00866149 |
| BI648497  | chr4  | 147451170 | 147453961 | Agtrap        | 0,450185034 | 0,00550213 | 0,00963539 |
| AK019934  | chr11 | 16951858  | 16953107  | Cnrip1        | 0,450004084 | 0,00436201 | 0,0084648  |
| BI083036  | chr3  | 87924201  | 87924968  | Iqqap3        | 0,449762412 | 0,00397495 | 0,00805807 |
| U21050    | chr12 | 112458020 | 112505359 | Traf3         | 0,449707859 | 0,00473049 | 0,00887665 |
| AB018574  | chr5  | 107393340 | 107413450 | Cdc7          | 0,449595656 | 0,00091527 | 0,00453233 |
| BE852312  | chr8  | 106786666 | 106787347 | Klfl          | 0,449077081 | 0,00092773 | 0,00453527 |
| AK008505  | chr9  | 72308907  | 72339763  | Tex9          | 0,448887242 | 0,00558616 | 0,00971205 |
| AI585679  | chr8  | 19788354  | 19790445  | 2610005L07Rik | 0,448843684 | 0,00279898 | 0,00686391 |
| BG071381  | chr15 | 37295929  | 37389098  | Ncald         | 0,44854045  | 0,0030694  | 0,00710496 |
| BC019138  | chr10 | 80755741  | 80782714  | Pip5k1c       | 0,448503143 | 0,00495114 | 0,00910365 |
| U82470    | chr5  | 138804480 | 138806836 | Got2          | 0,448430092 | 0,00326244 | 0,00726976 |
| BB207363  | chr19 | 28333368  | 28335704  | Glis3         | 0,447450501 | 2,04E-05   | 0,00215958 |
| BB825002  | chr18 | 24738381  | 24762308  | Slc39a6       | 0,447042841 | 0,00528262 | 0,00941806 |
| BB469472  | chr9  | 107157264 | 107158112 | Mapkapk3      | 0,447005659 | 0,0019244  | 0,00577186 |
| BB763680  | chr17 | 41013268  | 41017507  | 9130008F23Rik | 0,44665258  | 0,00447962 | 0,00858377 |
| BB468025  | chr15 | 33012886  | 33524885  | Pgcp          | 0,446389501 | 0,00067273 | 0,00422116 |
| AV254798  | chr15 | 39702134  | 39703853  | Lrp12         | 0,445917894 | 0,0019479  | 0,00581024 |
| AV313111  | chr4  | 42348805  | 42349020  | Gm13305, Gm2l | 0,44587617  | 0,00559439 | 0,00972246 |
| BB125604  | chr11 | 62214753  | 62216154  | Ncor1         | 0,445845265 | 0,0025698  | 0,00656123 |
| AK011896  | chr14 | 104876750 | 104878469 | Rnf219        | 0,445573396 | 0,00155085 | 0,00527283 |
| BM120580  | chr1  | 34870068  | 34899835  | Fam168b       | 0,445559498 | 0,00155782 | 0,00527283 |
| BG071655  | chr10 | 62267318  | 62268314  | Tet1          | 0,444502981 | 0,00198719 | 0,0058673  |
| BB031791  | chr17 | 84583263  | 84585284  | Zfp36l2       | 0,444010285 | 0,005719   | 0,00984837 |
| BF467211  | chr4  | 136877676 | 136913601 | Cdc42         | 0,443804131 | 0,00287891 | 0,00694645 |
| NM_010438 | chr10 | 61731851  | 61842631  | Hk1           | 0,443441285 | 0,00267834 | 0,00670047 |
| BB369687  | chr18 | 73736970  | 73737985  | Mex3c         | 0,443350621 | 0,00176737 | 0,00553594 |
| BM217803  | chr2  | 26251935  | 26264721  | Inpp5e        | 0,443144773 | 0,00546596 | 0,00961239 |
| BB815190  | chr9  | 122985948 | 123022320 | Zdhc3         | 0,442739501 | 0,00071747 | 0,0042683  |
| BG141990  | chr16 | 10424833  | 10425405  |               | 0,442497129 | 0,00226231 | 0,00621535 |
| BM213151  | chr11 | 86536779  | 86537689  | Cltc          | 0,442124626 | 0,00082752 | 0,00446825 |
| BC004701  | chrX  | 99338296  | 99340062  | Ercc6l        | 0,442089385 | 0,00444116 | 0,00854109 |
| AK004894  | chr9  | 107877835 | 107886388 | Cdh29, Uba7   | 0,442058743 | 0,00300616 | 0,00703572 |
| BB231897  | chr3  | 104804832 | 104805803 | Ctnnbp2nl     | 0,441997465 | 0,00292811 | 0,00699492 |
| BG076140  | chr10 | 41615896  | 41628230  | Sesn1         | 0,441936195 | 0,00078862 | 0,00440796 |
| AV345706  | chr10 | 127024682 | 127025772 | Lrp1          | 0,441865746 | 0,00530075 | 0,00944276 |
| AK020665  | chrX  | 72819485  | 72823583  | Rab39b        | 0,441847369 | 0,00020372 | 0,00326825 |
| NM_024186 | chr13 | 91600701  | 91840840  | Ssbp2         | 0,441663648 | 0,00184853 | 0,00567763 |
| BB751120  | chrX  | 45317324  | 45319048  | Ocrl          | 0,441383621 | 0,00532496 | 0,0094586  |
| NM_010580 | chr16 | 33829750  | 33949232  | Itgb5         | 0,441336202 | 0,00091693 | 0,00453233 |
| NM_013819 | chr17 | 37407176  | 37411433  | H2-M3         | 0,440894382 | 0,00019772 | 0,00326825 |
| BM939312  | chr5  | 115747129 | 115748059 | Dynll1        | 0,44081646  | 0,0051619  | 0,00932534 |
| BB125181  | chr4  | 154894974 | 154895601 |               | 0,440272915 | 0,0008483  | 0,00446825 |
| M24849    | chr2  | 13495578  | 13504453  | Vim           | 0,439661466 | 0,00266257 | 0,00668414 |
| NM_011121 | chr5  | 35896363  | 35898903  | Plk1          | 0,439548723 | 0,00184107 | 0,00566673 |
| AI430801  | chr19 | 4270180   | 4270442   | Ankrd13d      | 0,4395472   | 0,00329586 | 0,00731422 |
| BC024454  | chr16 | 97711612  | 97713476  | Gm11847, Gm6: | 0,439292873 | 0,00029882 | 0,00345047 |
| NM_011909 | chr6  | 121195952 | 121220935 | Usp18         | 0,439008263 | 0,00537076 | 0,00950041 |
| AF200346  | chr9  | 45646658  | 45671061  | Bace1         | 0,438926111 | 0,00328948 | 0,00730857 |
| AK005172  | chr1  | 133191795 | 133207642 | Srgap2        | 0,438672143 | 0,00200171 | 0,00589384 |
| BB756069  | chr2  | 84280587  | 84281398  | Tfpi          | 0,438640218 | 0,00091002 | 0,00453233 |
| BM208226  | chr11 | 105784447 | 105785702 | Tanc2         | 0,438623496 | 0,00323792 | 0,00724554 |
| AV225959  | chr16 | 62793504  | 62794625  | Arh13b        | 0,438582454 | 0,0015025  | 0,00527107 |
| NM_008416 | chr8  | 87500808  | 87502647  | Junb          | 0,438500381 | 0,00314126 | 0,00716611 |
| BB631473  | chr2  | 18887139  | 18887709  | A130001G05Rik | 0,4383773   | 0,00190224 | 0,00574242 |
| BC004727  | chr9  | 38525852  | 38550125  | Vwa5a         | 0,438125169 | 0,00105685 | 0,0047024  |
| BF661746  | chr8  | 71840261  | 71841110  |               | 0,437941478 | 0,0038303  | 0,00789885 |
| AK011797  | chr6  | 49117962  | 49164703  | Igf2bp3       | 0,437644092 | 0,00350671 | 0,00757014 |
| AV255657  | chr16 | 43980462  | 43981738  | Gramd1c       | 0,437539448 | 0,00127592 | 0,00502384 |
| BI076733  | chr19 | 3386210   | 3387997   | 4833417J20Rik | 0,43732872  | 0,00552401 | 0,00965423 |
| NM_019467 | chr17 | 35307930  | 35310223  | Aif1          | 0,436607858 | 0,00200998 | 0,00590219 |
| AF038562  | chr7  | 29649487  | 29651228  | Lgals7        | 0,436498923 | 0,00076562 | 0,00436395 |
| BB281667  | chr7  | 50846217  | 50847421  | Zfp719        | 0,436453542 | 0,00110035 | 0,00478641 |

|           |       |           |           |                |             |            |            |
|-----------|-------|-----------|-----------|----------------|-------------|------------|------------|
| AK020120  | chr7  | 52231977  | 52241709  | Prmt1          | 0,435847397 | 0,00346897 | 0,00753996 |
| AW123256  | chr5  | 109073662 | 109074484 | 0710007G10Rik, | 0,435236061 | 0,00018131 | 0,00322705 |
| NM_021891 | chr11 | 11700293  | 11706221  | Fgnl1          | 0,434720489 | 0,00337494 | 0,00741394 |
| NM_023220 | chr2  | 126719566 | 126758971 | 2010106G01Rik  | 0,434520154 | 0,00108785 | 0,00475783 |
| NM_016677 | chr12 | 17697644  | 17798739  | Hpcal1         | 0,433990389 | 0,00339796 | 0,00744568 |
| AF059567  | chr4  | 88952195  | 88956902  | Cdckn2b        | 0,433976853 | 0,00051335 | 0,00395299 |
| AI987925  | chr19 | 3322333   | 3385735   | Cpt1a          | 0,433940757 | 0,0012669  | 0,00500943 |
| BB132493  | chr12 | 27127614  | 27128772  | Rsad2          | 0,43319395  | 0,00229565 | 0,00624688 |
| BB758819  | chr7  | 109590219 | 109617579 | Rrm1           | 0,43277528  | 0,00163802 | 0,00539343 |
| BB703513  | chr17 | 5841288   | 5931958   | Snx9           | 0,432763281 | 0,00149116 | 0,00526086 |
| BB534930  | chr10 | 120808691 | 120809287 | Gns            | 0,430919413 | 0,00430326 | 0,00841092 |
| BC016234  | chr15 | 102289662 | 102293231 | Prr13          | 0,430646198 | 0,00023069 | 0,0033347  |
| NM_009964 | chr9  | 50560862  | 50564792  | Cryab          | 0,429712902 | 0,00246339 | 0,00642461 |
| BG065285  | chr10 | 60225331  | 60225906  | Unc5b          | 0,429656314 | 0,00557704 | 0,00970359 |
| AV328340  | NA    | NA        | NA        | Eif2ak2        | 0,429297596 | 0,00146324 | 0,00522449 |
| BB167125  | chr2  | 106812962 | 106813596 |                | 0,429233624 | 0,00022373 | 0,00332788 |
| NM_025822 | chr3  | 66789597  | 67162320  | Rsrc1          | 0,429217261 | 0,00368387 | 0,00777151 |
| BB367890  | chr4  | 116007962 | 116008597 | Mast2          | 0,42912653  | 0,00062287 | 0,00411742 |
| BB554226  | chr7  | 28091016  | 28092848  | Ltbp4          | 0,428931746 | 0,00218968 | 0,00612349 |
| BM196296  | chr2  | 180701944 | 180717231 | Arfgap1        | 0,428928772 | 0,00427426 | 0,00840218 |
| AK004870  | chr17 | 22561224  | 22593655  | 1300003B13Rik  | 0,428863369 | 0,00513267 | 0,00929186 |
| NM_010592 | chr8  | 73222850  | 73224515  | Jund           | 0,428505314 | 0,00015004 | 0,00317481 |
| BB199681  | chr10 | 26525491  | 26526193  |                | 0,427418127 | 0,0006637  | 0,00419404 |
| AW494389  | NA    | NA        | NA        | 2610524H06Rik  | 0,426450442 | 0,00530771 | 0,00945116 |
| BB042052  | chr19 | 36922186  | 36922905  |                | 0,426231759 | 0,00081501 | 0,00446352 |
| AF016040  | chr11 | 30008753  | 30098246  | Spnb2          | 0,426058961 | 0,00045166 | 0,0038642  |
| BB416907  | chr8  | 98410233  | 98410906  |                | 0,425920183 | 0,00209472 | 0,00601279 |
| AK018397  | chrX  | 104978092 | 104980504 | 2610002M06Rik  | 0,42585819  | 0,00401594 | 0,0081009  |
| BB667188  | chr5  | 39059724  | 39061251  | Zfp518b        | 0,425759315 | 0,00096399 | 0,00458346 |
| AV364676  | chr5  | 65432827  | 65433103  | Fam114a1       | 0,425188653 | 0,00406045 | 0,00814152 |
| BB303199  | chrX  | 150158096 | 150175958 | 2210013O21Rik  | 0,425063416 | 0,00476191 | 0,00890654 |
| AK017218  | chr18 | 35816348  | 35821809  | Spat24         | 0,424502513 | 0,0055749  | 0,00970359 |
| AK005166  | chr9  | 108686126 | 108700728 | Ip6k2          | 0,423999656 | 0,00065242 | 0,00419404 |
| AI642171  | chr8  | 73172975  | 73173753  | Pgpep1         | 0,423940881 | 0,00010412 | 0,00305957 |
| BQ178166  | chr4  | 21927634  | 21928606  | 6230409E13Rik  | 0,42374992  | 0,00203408 | 0,00593921 |
| BM218086  | chr6  | 133989484 | 133990058 |                | 0,423102759 | 0,00164471 | 0,0054015  |
| NM_028232 | chr17 | 53815023  | 53828637  | Sgol1          | 0,42305144  | 0,00097255 | 0,00460358 |
| BB457226  | chr14 | 84851275  | 84876197  | 9630013A20Rik  | 0,423044109 | 0,00199695 | 0,00588381 |
| BB416434  | chr16 | 95942374  | 95942654  | Ets2           | 0,422528336 | 0,00335028 | 0,00737469 |
| BC010248  | chr6  | 87738858  | 87759751  | Rab43          | 0,422297028 | 0,00134022 | 0,00510593 |
| BM114723  | chr1  | 170251332 | 170251884 |                | 0,421741238 | 0,00377797 | 0,00785058 |
| AF042856  | chr5  | 16059312  | 16078530  | Hgf            | 0,421219754 | 0,00560343 | 0,00973427 |
| BB018903  | chr4  | 117541860 | 117545073 | Ccdc24         | 0,4211818   | 0,00459389 | 0,00870589 |
| BB775640  | chr2  | 84440938  | 84441399  | Ctnnd1         | 0,420675586 | 0,00155245 | 0,00527283 |
| BE196832  | chr6  | 149275277 | 149277970 | 2810474O19Rik  | 0,420634766 | 0,00585808 | 0,00998343 |
| BM241271  | chr3  | 142211246 | 142213110 | Gbp6           | 0,419985085 | 0,00096461 | 0,00458346 |
| BM218838  | chr5  | 48495100  | 48495488  |                | 0,419212895 | 0,00273804 | 0,00678727 |
| BB177192  | chr6  | 143137028 | 143138178 | Etnk1          | 0,418600227 | 0,0013879  | 0,00512992 |
| BB258991  | chrX  | 130885962 | 130897181 | Cenpi          | 0,418437774 | 0,00165926 | 0,00542316 |
| NM_008138 | chr9  | 107516919 | 107537658 | Gnai2          | 0,417471611 | 0,00197504 | 0,00584704 |
| BB558917  | chr6  | 124472847 | 124473144 | C1ra, C1rb     | 0,417400722 | 0,00190155 | 0,00574242 |
| NM_019410 | chr3  | 57645821  | 57651679  | Pfn2           | 0,417214152 | 0,00141762 | 0,00518144 |
| BB380335  | chr10 | 118635867 | 118636980 | Cand1          | 0,416920726 | 0,0057899  | 0,00992718 |
| BB113440  | chr8  | 109886601 | 109887274 | Nfat5          | 0,416844152 | 0,0029769  | 0,00702665 |
| AV324314  | chr16 | 87731484  | 87733590  | Bach1          | 0,416777702 | 0,00193763 | 0,00579349 |
| BB425841  | chrX  | 103060790 | 103061608 | Atrx           | 0,416605849 | 0,00072303 | 0,0042683  |
| AK019582  | chr19 | 47944170  | 47959435  | Gsto2          | 0,41588311  | 0,00479758 | 0,00894627 |
| NM_009404 | chr17 | 57244747  | 57247186  | Tnfsf9         | 0,414718698 | 0,00015492 | 0,00319851 |
| BI440651  | chr13 | 94709181  | 94712970  | Arsb           | 0,414609477 | 0,00061679 | 0,00410983 |
| AV340862  | chr8  | 73438665  | 73441429  | Mtap1s         | 0,414487357 | 0,002396   | 0,00634729 |
| AV051525  | chr9  | 65914156  | 65914430  | Ppib           | 0,414322192 | 0,00019643 | 0,00326825 |
| BC024416  | NA    | NA        | NA        | B230354O11Rik  | 0,414241787 | 0,00222015 | 0,00617431 |
| NM_009642 | chr4  | 147454000 | 147462124 | Agtrap         | 0,414136998 | 0,0046647  | 0,00880051 |
| BF021255  | chr2  | 118912303 | 118929847 | Casc5          | 0,414095377 | 0,00145583 | 0,00522274 |
| AI463873  | chr7  | 77497505  | 77505478  | Nr2f2          | 0,413996363 | 0,00223568 | 0,00619627 |
| BB449018  | chr2  | 37243481  | 37244142  | Rc3h2          | 0,4134429   | 0,00167168 | 0,00543419 |
| BB076855  | chr3  | 119421463 | 119486402 | Ptbp2          | 0,413279584 | 0,00381416 | 0,00789748 |
| BQ178970  | chr3  | 89743402  | 89744695  | Atp8b2         | 0,41303473  | 0,00145081 | 0,00522274 |
| NM_010561 | chr9  | 21177937  | 21209805  | Ilf3           | 0,412987494 | 0,00060329 | 0,00410983 |
| AK020159  | chr6  | 127911413 | 127913959 | Tspan9         | 0,412744244 | 0,00145658 | 0,00522274 |
| BE688087  | chr17 | 37210740  | 37212447  | Gabbr1         | 0,412086755 | 0,0003132  | 0,00346998 |
| BM239652  | chr8  | 109902700 | 109903406 | Nfat5          | 0,411888285 | 0,00027303 | 0,0033496  |
| BB000798  | chr14 | 59855309  | 59855591  | Rcbtb1         | 0,411246413 | 0,00222207 | 0,00617431 |
| NM_016921 | chr19 | 3896051   | 3907112   | Tcigr1         | 0,410995642 | 0,00297578 | 0,00702665 |
| BB442341  | chr5  | 151611960 | 151613284 | Pds5b          | 0,410819054 | 0,00320142 | 0,00719657 |
| NM_023130 | chr2  | 154616892 | 154692982 | Raly           | 0,410168896 | 0,00048071 | 0,00388445 |
| BF101721  | chr11 | 75834090  | 75841284  | Fam101b        | 0,410099247 | 0,0048289  | 0,00897474 |
| BF457754  | chr4  | 148892344 | 148940834 | Ctnnbip1       | 0,410063716 | 0,004314   | 0,00842382 |
| BB115446  | chr14 | 76159922  | 76160271  |                | 0,409844914 | 0,00403942 | 0,00812737 |
| NM_025974 | chr9  | 120480633 | 120483770 | Rpl14          | 0,409745497 | 0,00503942 | 0,00919949 |
| BG064675  | chr4  | 155385765 | 155387723 | Sdf4           | 0,409688698 | 0,00011387 | 0,00305957 |
| AW556858  | chr11 | 3230381   | 3242974   | Pik3ip1        | 0,409687278 | 0,00450159 | 0,00860707 |



|           |       |           |           |                |             |            |            |
|-----------|-------|-----------|-----------|----------------|-------------|------------|------------|
| J04620    | chr10 | 127452254 | 127467093 | Prim1          | 0,409685859 | 0,00237136 | 0,00634084 |
| NM_015796 | chr7  | 29501891  | 29523157  | Fbxo17         | 0,409458743 | 0,00105214 | 0,00470106 |
| AK017464  | chr9  | 14080848  | 14130580  | Sesn3          | 0,408891506 | 0,00177881 | 0,00555782 |
| BB251322  | chr7  | 134171242 | 134171630 | Kif22          | 0,40881499  | 0,003932   | 0,00802512 |
| NM_010864 | chr9  | 74919379  | 75067292  | Myo5a          | 0,40874557  | 0,00014727 | 0,00316942 |
| BB200164  | chr19 | 34279973  | 34280614  |                | 0,408684661 | 0,00178329 | 0,00556381 |
| BM220776  | chr9  | 58093056  | 58093820  | Pml            | 0,408510481 | 0,00039036 | 0,00376032 |
| AV227603  | chr4  | 6292828   | 6323429   | Sdcbp          | 0,408500571 | 0,00092825 | 0,00453527 |
| BC026795  | chr5  | 152445330 | 152453767 | Rfc3           | 0,408353359 | 0,00244649 | 0,00640452 |
| AV250971  | chr3  | 115641890 | 115643359 | Slc30a7        | 0,40824157  | 0,00224259 | 0,00619637 |
| BG067888  | chr6  | 86952281  | 86953220  | Aak1           | 0,407719821 | 0,00379459 | 0,00787437 |
| BB292098  | chr19 | 30145635  | 30146103  | Uhrf2          | 0,407495208 | 0,00222533 | 0,00617548 |
| AV264909  | chr14 | 21518201  | 21519419  | Fut11          | 0,40726225  | 0,0006143  | 0,00410983 |
| BB210733  |       | NA        | NA        |                | 0,406624768 | 0,00251812 | 0,00647113 |
| NM_011658 | chr12 | 34642676  | 34644691  | Twist1         | 0,406340199 | 0,00422642 | 0,00835473 |
| BF175246  | chr9  | 90122456  | 90123083  |                | 0,40630781  | 0,00262818 | 0,00413991 |
| NM_023670 | chr6  | 49035517  | 49164792  | Igf2bp3        | 0,406261343 | 1,88E-05   | 0,0021404  |
| AK011474  | chr5  | 138628714 | 138635138 | Cnpy4          | 0,406195173 | 0,0039802  | 0,00805807 |
| AV345051  | chr8  | 14979859  | 15001076  | Arhgef10       | 0,406110716 | 0,00250627 | 0,0064624  |
| BC004617  | chr17 | 35649678  | 35653734  | Tcf19          | 0,405823693 | 0,00239148 | 0,00634729 |
| AK019480  | chrX  | 50596593  | 50622236  | Fam122b        | 0,404327154 | 0,00226308 | 0,00621535 |
| BB457668  | chr2  | 83506960  | 83507874  |                | 0,40422067  | 0,0019175  | 0,00576136 |
| AW545979  | chr8  | 42390634  | 42391510  |                | 0,404011986 | 0,00460162 | 0,00871179 |
| BB250208  | chr5  | 123439974 | 123448348 | A930024E05Rik  | 0,403943382 | 0,00380638 | 0,00789075 |
| AK013095  | chr5  | 152449813 | 152453770 | Rfc3           | 0,403706858 | 0,00432838 | 0,0084448  |
| AW553216  | chr14 | 121705425 | 121706129 |                | 0,403601936 | 0,00019958 | 0,00326825 |
| BB705075  | chr3  | 121160671 | 121161113 | Cnn3           | 0,40351662  | 0,00452385 | 0,00862849 |
| NM_030261 | chr9  | 14135675  | 14137544  | Sesn3          | 0,4033374   | 0,00020476 | 0,00326825 |
| AW549928  | chr12 | 24106303  | 24290627  | LOC100505088   | 0,402582119 | 0,00143705 | 0,00520526 |
| BB432268  | chr8  | 109864786 | 109865394 |                | 0,402420303 | 0,00130201 | 0,0050565  |
| BB815011  | chr18 | 53405402  | 53550574  | Snx24          | 0,401985397 | 0,00311732 | 0,00713922 |
| BF148012  | chr2  | 156923269 | 156924980 | Samhd1         | 0,401963107 | 0,00371419 | 0,00779821 |
| AA409309  | chr4  | 141414059 | 141414703 | Efh2           | 0,401677624 | 0,00212342 | 0,00603931 |
| NM_133859 | chr3  | 103539320 | 103541924 | Olfml3         | 0,401442426 | 0,00333577 | 0,00736142 |
| BC021518  | chr17 | 84911234  | 84971387  | Plekhh2        | 0,40130193  | 0,00034808 | 0,00358878 |
| BB071890  |       | NA        | NA        |                | 0,400983562 | 0,00394887 | 0,00803651 |
| AK006809  | chr17 | 14536066  | 14540594  | Smoc2          | 0,400927977 | 0,00289113 | 0,00695193 |
| AI606403  | chr18 | 35833971  | 35862792  | Dnajc18        | 0,400784883 | 0,00265181 | 0,00668027 |
| BB428710  | chr18 | 70788108  | 70788785  | Mbd2           | 0,400683498 | 7,86E-05   | 0,00305957 |
| AV158645  | chr6  | 42635235  | 42660070  | Fam115a        | 0,400543268 | 0,00097654 | 0,00460358 |
| M29881    | chr17 | 35576133  | 35580713  | H2-Q7          | 0,400132578 | 0,00471606 | 0,00886276 |
| BI149999  | chr6  | 146837115 | 146980545 | Ppfbp1         | 0,399833151 | 0,00239351 | 0,00634729 |
| AJ251462  | chr5  | 123157662 | 123177850 | P2rx4          | 0,399777726 | 0,00299812 | 0,00703362 |
| BB746075  | chr2  | 25207809  | 25208394  | Dpp7           | 0,399464721 | 0,00051179 | 0,00394798 |
| AK003513  | chr1  | 167522308 | 167564662 | Mpzl1          | 0,399319381 | 0,00179952 | 0,00559036 |
| Y07687    | chr4  | 81941636  | 82151671  | Nfib           | 0,399279249 | 0,00145751 | 0,00522274 |
| NM_013519 | chr8  | 123640070 | 123642795 | Foxc2          | 0,399110461 | 0,00488346 | 0,00904043 |
| BC009128  | chr7  | 51788113  | 51804102  | Pold1          | 0,398768954 | 0,0032312  | 0,00724475 |
| BB090901  | chr2  | 52993737  | 52994599  | Prpf40a        | 0,398733023 | 0,00527726 | 0,00941806 |
| BG060248  | chr4  | 108185649 | 108197636 | Zcchc11        | 0,398513361 | 0,0002678  | 0,0033347  |
| BB463610  | chr7  | 100006034 | 100006678 | 4632434I11Rik  | 0,398280016 | 0,00519045 | 0,00935078 |
| NM_026613 | chr2  | 109858242 | 109885006 | Ccdc34         | 0,398155806 | 0,00406285 | 0,00814258 |
| AK007198  | chr11 | 101280127 | 101286642 | 1700113I22Rik, | 0,397627654 | 0,00027599 | 0,00335239 |
| AV121892  | chr1  | 153739451 | 153937377 | 1700025G04Rik  | 0,397572535 | 0,00427271 | 0,00840218 |
| BI788645  | chr12 | 8778166   | 8800517   | Sdc1           | 0,397495381 | 0,00154347 | 0,00527283 |
| BE335894  | chr5  | 134995194 | 134996659 | 2700029L08Rik  | 0,397466452 | 0,00422776 | 0,00835473 |
| BB533980  | chr2  | 73357818  | 73358132  |                | 0,396996997 | 0,00265774 | 0,00668414 |
| BE133150  | chr17 | 35087177  | 35089392  | 1110038B12Rik  | 0,396741165 | 0,00175277 | 0,00552837 |
| AV369536  | chr5  | 5664828   | 5665789   | Steap2         | 0,396578948 | 0,00208529 | 0,0060009  |
| AI893638  | chr12 | 742010595 | 74201016  | Six4           | 0,395730454 | 0,00277515 | 0,0068339  |
| BE992311  | chr7  | 133838942 | 133840858 | Bola2          | 0,395371285 | 0,00214275 | 0,00605606 |
| BB655693  | chr14 | 58507739  | 58509297  | Zdhhc20        | 0,395297298 | 0,00292617 | 0,00699415 |
| BB521695  | chr1  | 178951262 | 178954213 | Akt3           | 0,39516854  | 5,48E-05   | 0,00292118 |
| BB131219  | chr18 | 37641736  | 37642681  | Pcdhb16        | 0,394508968 | 0,00442116 | 0,00852245 |
| X53753    | chr14 | 113713830 | 113715949 | Tpm3           | 0,394444712 | 0,00059512 | 0,00410983 |
| BB800078  | chr7  | 118011783 | 118012232 | Mrv1           | 0,394422839 | 0,00569854 | 0,0098325  |
| BB035643  | chr4  | 120192979 | 120193651 |                | 0,394370898 | 0,0010499  | 0,00470106 |
| NM_018738 | chr11 | 58013131  | 58021094  | Igtp           | 0,394194622 | 0,00248139 | 0,00644613 |
| AV341977  | chr13 | 63346908  | 63347559  |                | 0,393906465 | 0,00511224 | 0,00927242 |
| BG071163  | chr7  | 119824644 | 119825185 |                | 0,39377543  | 0,00402267 | 0,00810343 |
| AV122663  | chr8  | 74659177  | 74677039  | Tpm4           | 0,393124995 | 4,65E-05   | 0,00288253 |
| BM114815  | chr3  | 51319240  | 51321113  | Setd7          | 0,392702857 | 0,00222138 | 0,00617431 |
| AK014134  | chr4  | 120593802 | 120597610 | Dem1           | 0,392555896 | 0,00410372 | 0,00820554 |
| BM120889  | chr3  | 51763786  | 51764461  |                | 0,392451152 | 0,0007247  | 0,0042683  |
| NM_015742 | chr8  | 73796612  | 73884612  | Myo9b          | 0,392100395 | 0,00390689 | 0,00799606 |
| AV246911  | chr2  | 27894007  | 27895034  | Col5a1         | 0,391929209 | 0,00250372 | 0,0064624  |
| BC019711  | chr7  | 152486813 | 152495462 | Mrgprf         | 0,391885745 | 0,00295322 | 0,00701103 |
| AF192558  | chr17 | 29095557  | 29484849  | Mtch1          | 0,391790684 | 0,00151476 | 0,00527107 |
| BB392263  | chr4  | 134118410 | 134140311 | Man1c1         | 0,391764886 | 0,00083702 | 0,00446825 |
| BB036856  | chr6  | 11944676  | 11945309  | Phf14          | 0,391251991 | 0,00548248 | 0,00961786 |
| AV238214  | chr9  | 56764996  | 56773990  | Snx33          | 0,391220805 | 0,00190308 | 0,00574242 |
| AV349116  | chr2  | 113671648 | 113673358 | Arhgap11a      | 0,391150306 | 0,00514586 | 0,00930024 |

|           |       |           |           |               |             |            |            |
|-----------|-------|-----------|-----------|---------------|-------------|------------|------------|
| AK011230  | chr2  | 118752236 | 118754321 | Chst14        | 0,390673418 | 5,88E-05   | 0,00294864 |
| BG072867  | chr7  | 28284342  | 28305233  | Prx           | 0,39067071  | 0,0011954  | 0,0049118  |
| BM224656  | chr5  | 3466330   | 3467016   |               | 0,390520449 | 0,00196421 | 0,00582873 |
| BI106777  | chr5  | 15878038  | 15880329  | Cacna2d1      | 0,38988485  | 0,00193828 | 0,00579349 |
| AI527205  | chr7  | 77496835  | 77497336  | Nr2f2         | 0,38911945  | 0,00574674 | 0,00988439 |
| AV172948  | chr3  | 68833663  | 68838545  | Smc4          | 0,388971134 | 4,09E-05   | 0,00273743 |
| BE943736  | chr15 | 63920180  | 64181476  | Asap1         | 0,388689489 | 0,00537988 | 0,0095095  |
| BB493533  | chr15 | 103174722 | 103197008 | Itga5         | 0,388682754 | 0,00344796 | 0,00752488 |
| AU015121  | chr14 | 9242245   | 9242819   | Ccnb1         | 0,388417471 | 0,00420115 | 0,00832751 |
| BB128849  | chr5  | 65215728  | 65216353  | Klf3          | 0,388124121 | 0,00070833 | 0,00425409 |
| AF212320  | chr15 | 99450927  | 99482062  | Racgap1       | 0,388106634 | 0,00244573 | 0,00640452 |
| BG144294  | chr16 | 31693497  | 31693982  |               | 0,387879383 | 0,00352095 | 0,00758684 |
| BG073473  | chrX  | 50308453  | 50310120  | Phf6          | 0,387734227 | 0,00024917 | 0,0033347  |
| BB104669  | chr4  | 116832251 | 116832569 | Kif2c         | 0,387292374 | 0,00129048 | 0,00503101 |
| BM116703  | chr2  | 23373318  | 23373878  | Spopl         | 0,387140729 | 0,00468357 | 0,00882079 |
| BG063981  | chr4  | 40151881  | 40152602  | Ddx58         | 0,386982438 | 0,00016723 | 0,0032003  |
| AK013495  | chr5  | 112814098 | 112824205 | Asphd2        | 0,386592351 | 0,00267168 | 0,00669471 |
| BB037558  | chr15 | 93070169  | 93072773  | Gxylt1        | 0,385973847 | 0,00036099 | 0,00362912 |
| NM_008362 | chr1  | 40281924  | 40373043  | Il1r1         | 0,385931043 | 0,00182635 | 0,00562942 |
| BB529533  | chr10 | 30520781  | 30521447  | Ncoa7         | 0,385745171 | 0,00282066 | 0,00687437 |
| AV272026  | chrX  | 154003881 | 154004651 | Mbtps2, Yy2   | 0,385293566 | 0,00168477 | 0,00543469 |
| BB396393  | chr10 | 61246892  | 61247568  | Gm2137        | 0,385186755 | 0,00248613 | 0,00644613 |
| BQ176704  | chr2  | 91117984  | 91284834  | 1110051M20Rik | 0,384526518 | 0,00228884 | 0,00624279 |
| BC014822  | chr16 | 21204827  | 21223376  | Ephb3         | 0,3838009   | 0,00069397 | 0,00422116 |
| AW208668  | chr6  | 57608026  | 57615088  | Herc6         | 0,383674556 | 0,00152225 | 0,00527107 |
| AK016470  | chr6  | 22256519  | 22306164  | Fam3c         | 0,383367515 | 0,00136038 | 0,0051197  |
| AK004560  | chr2  | 59679794  | 59684270  | Tanc1         | 0,382522098 | 0,00080367 | 0,00442665 |
| BM217851  | chr18 | 23965360  | 23965903  | Mapre2        | 0,382495585 | 0,00328948 | 0,00730857 |
| BC009096  | chr2  | 119444452 | 119477289 | Nusap1        | 0,381908782 | 0,00196483 | 0,00582873 |
| AV238225  | chr3  | 88285070  | 88285265  | Lmna          | 0,381362528 | 4,84E-05   | 0,00292118 |
| BB125494  | chr15 | 53156573  | 53157159  |               | 0,380752391 | 0,00439941 | 0,00850384 |
| AK020090  | chr9  | 107886553 | 107888216 | 6230427J02Rik | 0,380741834 | 0,00453214 | 0,00864051 |
| BB246182  | chr11 | 116197656 | 116199212 | Rnf157        | 0,38035672  | 0,00500805 | 0,00916947 |
| AV346607  | chr14 | 70481555  | 70482420  | Egr3          | 0,378206221 | 0,00030196 | 0,00346019 |
| NM_010221 | chr11 | 100276870 | 100286154 | Fkbp10        | 0,37770715  | 0,00133445 | 0,00510593 |
| NM_010327 | chr16 | 18620557  | 18621855  | Gp1bb         | 0,376738401 | 0,00442525 | 0,00852589 |
| BB530868  |       | NA        | NA        |               | 0,376618298 | 0,0028136  | 0,00686486 |
| BB540721  | chr9  | 42220399  | 42223608  | Tbcel         | 0,375372535 | 0,00243355 | 0,00639379 |
| AB041034  | chr7  | 94395165  | 94547220  | Nox4          | 0,374987653 | 0,00388271 | 0,00796534 |
| BB385244  |       | NA        | NA        | Pold1         | 0,374665489 | 0,00415435 | 0,00827777 |
| AK004681  | chr6  | 53765377  | 53770477  | 1200009O22Rik | 0,374142562 | 0,00105533 | 0,0047024  |
| J02995    | chr2  | 31615465  | 31659063  | Abl1          | 0,373963663 | 0,00270589 | 0,00674065 |
| AW208927  | chr5  | 117690974 | 117723897 | Taok3         | 0,373164849 | 0,00480364 | 0,00894796 |
| BC022666  | chr11 | 61299017  | 61302380  | Mfap4         | 0,372774479 | 0,00295985 | 0,00701521 |
| BB543167  | chr10 | 120834026 | 120834300 | Gns           | 0,372721514 | 0,00522821 | 0,00938145 |
| BC011462  | chrX  | 147481775 | 147524069 | Fgd1          | 0,372574283 | 0,00130292 | 0,0050565  |
| NM_008926 | chr5  | 99361026  | 99466370  | Prkg2         | 0,372482616 | 0,00066537 | 0,00419404 |
| BE849316  | chr5  | 117724675 | 117725110 | Taok3         | 0,371473191 | 0,0044959  | 0,00860542 |
| AK014938  | chr15 | 91610808  | 91646111  | Lrrk2         | 0,371452592 | 0,00123701 | 0,00497083 |
| NM_053254 | chr10 | 81053649  | 81063645  | Tle6          | 0,371184919 | 0,00501923 | 0,00917832 |
| AF220434  | chr4  | 107236545 | 107307665 | Glis1         | 0,370916152 | 0,00261227 | 0,00661135 |
| BI646741  | chr9  | 63494573  | 63497505  | Smad3         | 0,370787625 | 0,00198942 | 0,0058673  |
| BQ175788  | chr7  | 142300116 | 142365329 | Dock1         | 0,370609046 | 0,00294275 | 0,00701063 |
| BM120952  | chr5  | 111538420 | 111540142 | 8430408J09Rik | 0,370472921 | 0,00273244 | 0,00678555 |
| AK019882  | chr7  | 117365247 | 117426390 | Swap70        | 0,370362517 | 0,0051827  | 0,00935078 |
| AI480643  | chr5  | 107627695 | 107628145 |               | 0,370313744 | 0,00450414 | 0,00860707 |
| BB030482  | chr15 | 96527022  | 96530161  | Slc38a2       | 0,37017901  | 0,0036961  | 0,00778708 |
| BB759260  | chr6  | 42308164  | 42308391  | Zyx           | 0,370100759 | 0,00031712 | 0,00349756 |
| BB308657  | chr10 | 36859243  | 36860722  | 5930403N24Rik | 0,369934049 | 0,00491096 | 0,00906486 |
| BM115354  | chr17 | 80637648  | 80668288  | Dhx57         | 0,369817397 | 0,00084834 | 0,00446825 |
| BG069355  | chr10 | 110183387 | 110224455 | E2f7          | 0,36972769  | 0,00539176 | 0,00952274 |
| AK007283  | chrX  | 156380652 | 156411262 | Sh3kbp1       | 0,369703345 | 0,0024854  | 0,00644613 |
| AK011886  | chr4  | 132088402 | 132089510 | Atpif1        | 0,369280759 | 0,00238709 | 0,00634729 |
| NM_023564 | chr11 | 69660160  | 69664657  | Plscr3        | 0,368909795 | 0,00119356 | 0,0049118  |
| BB249222  | chr5  | 104934565 | 104934838 | Pkd2          | 0,368400009 | 0,00107144 | 0,00473162 |
| AU017373  | chr14 | 62950904  | 62991831  | Rnaseh2b      | 0,368302986 | 0,00137894 | 0,00512992 |
| AK003403  | chr11 | 68884313  | 68886532  | Tmem107       | 0,367605435 | 0,00417117 | 0,0082984  |
| NM_007855 | chr1  | 93698037  | 93744605  | Twist2        | 0,367458951 | 0,00038012 | 0,00368754 |
| BC011208  | chr11 | 80623867  | 80635768  | Tmem98        | 0,367390188 | 0,00155785 | 0,00527283 |
| BI900155  | chr2  | 173411654 | 173413422 | Ppp4r1-ps     | 0,367031299 | 0,00258995 | 0,00658556 |
| BB314358  | chr2  | 156588772 | 156590099 | Dlgap4        | 0,366895216 | 0,00042697 | 0,00382426 |
| BB524113  | chr10 | 125434659 | 125452114 | Lrig3         | 0,366707074 | 0,00065911 | 0,00419404 |
| BC028271  | chr11 | 107072753 | 107074246 | Pitpnc1       | 0,365508028 | 0,00429414 | 0,00841064 |
| BE853371  | chr14 | 79987474  | 80030608  | Sugt1         | 0,365495361 | 0,00159178 | 0,00531776 |
| BC005667  | chr8  | 125098535 | 125100807 | Aprt          | 0,365233246 | 0,00211219 | 0,00603178 |
| NM_021372 | chr11 | 20443289  | 20549148  | Sertad2       | 0,365200337 | 2,04E-06   | 0,00110601 |
| AW557527  | chr1  | 153737977 | 153738979 | 1700025G04Rik | 0,365153509 | 0,00045453 | 0,0038642  |
| AK014680  | chr11 | 88785333  | 88816756  | Scpep1        | 0,364899227 | 0,00017344 | 0,0032003  |
| AV341198  | chr3  | 89554858  | 89557371  | Adar          | 0,364549089 | 0,00152994 | 0,00527283 |
| BB699415  | chr6  | 88833468  | 88834012  | Mcm2          | 0,364328055 | 0,00273266 | 0,00678555 |
| NM_009254 | chr13 | 34009796  | 34105251  | Serpinb6a     | 0,364170256 | 0,00522869 | 0,00938145 |
| NM_022419 | chr8  | 73980603  | 73987563  | Abhd8         | 0,364085704 | 0,00379947 | 0,00788018 |

|           |       |           |           |                 |             |            |            |
|-----------|-------|-----------|-----------|-----------------|-------------|------------|------------|
| AV118079  | chr14 | 76840485  | 76841427  | LOC100503222    | 0,363853603 | 0,00037993 | 0,00368754 |
| NM_009870 | chr10 | 126500629 | 126504451 | Cdk4            | 0,363421329 | 0,0045959  | 0,00870589 |
| BB005556  | chr16 | 44485155  | 44491400  | Boc             | 0,363375989 | 0,00065464 | 0,00419404 |
| AK009425  | chr3  | 123045975 | 123068554 | Sec24d          | 0,36225437  | 0,00033374 | 0,00358663 |
| AF367247  | chrX  | 45462051  | 45490158  | Xpnp2           | 0,361762557 | 0,00498699 | 0,0091386  |
| BB713410  | chr10 | 61731854  | 61732369  | HK1             | 0,361696113 | 9,34E-05   | 0,00305957 |
| BE331859  | chr19 | 34266746  | 34267646  | Stambpl1        | 0,361671043 | 0,00554136 | 0,00967288 |
| C76835    | chr12 | 19301150  | 19303303  | 2610028L16Rik   | 0,361321498 | 0,00097748 | 0,00460358 |
| AV105428  |       | NA        | NA        | Pttg1           | 0,361173763 | 0,00208049 | 0,00599574 |
| AV311925  |       | NA        | NA        | Tpm3            | 0,360874723 | 0,00445239 | 0,0085485  |
| NM_080288 | chr13 | 20203382  | 20697168  | Elmo1           | 0,360678417 | 0,00094053 | 0,00454531 |
| AK007048  | chr17 | 66003018  | 66024393  | Rab31           | 0,360534694 | 0,00155267 | 0,00527283 |
| BE980124  | chr7  | 75097142  | 75372744  | Igf1r           | 0,360397273 | 0,00287402 | 0,00694541 |
| AW494038  | chr11 | 94269709  | 94335039  | Cacna1g         | 0,359863079 | 0,0056649  | 0,00979015 |
| BG072960  | chr12 | 9015420   | 9035652   | Wdr35           | 0,359520265 | 0,00261674 | 0,00661496 |
| AI325255  | chr11 | 100285789 | 100286145 | Kfbp10          | 0,359309753 | 0,00441171 | 0,0085222  |
| AF014010  | chr5  | 104888416 | 104934837 | Pkd2            | 0,358764737 | 0,00138555 | 0,00512992 |
| AW491660  | chr1  | 75210797  | 75215813  | Tuba4a          | 0,358245379 | 0,00527908 | 0,00941806 |
| AK004526  | chr9  | 90096884  | 90099087  | Tbc1d2b         | 0,358148548 | 0,00289644 | 0,00695193 |
| BB371406  | chr11 | 102465768 | 102469624 | Fzd2            | 0,357994667 | 9,66E-05   | 0,00305957 |
| BF165681  | chr15 | 96401848  | 96402577  | Slc38a1         | 0,357959928 | 0,00464637 | 0,00877825 |
| NM_025277 | chr4  | 59047959  | 59054771  | Gng10           | 0,357845812 | 0,00093045 | 0,00453527 |
| BB547181  | chr8  | 107776538 | 107777970 | B3gnt9-ps       | 0,357657351 | 0,00236403 | 0,00632983 |
| BM196656  | chr15 | 80842717  | 80848797  | Mkl1            | 0,357652393 | 0,00115479 | 0,00487049 |
| NM_019777 | chr1  | 133151177 | 133176183 | Ikbke           | 0,357134645 | 0,00145415 | 0,00522274 |
| BI083334  | chr2  | 173410205 | 173411779 | Ppp4r1-ps       | 0,356996046 | 0,00473162 | 0,00887665 |
| BG073383  | chr11 | 96208624  | 96209243  | Hoxb3           | 0,356904501 | 0,00115305 | 0,00487049 |
| BM227237  | chr9  | 56051455  | 56052379  | C23008A1A13Rik  | 0,356768464 | 0,00452347 | 0,00862849 |
| NM_011182 | chr5  | 144383321 | 144471114 | Cyth3           | 0,356368074 | 0,00211662 | 0,00603178 |
| BB087602  | chr18 | 16850862  | 16852015  | 9430011C21Rik   | 0,356365604 | 0,00102217 | 0,004668   |
| BB445684  | chr10 | 120802148 | 120834309 | Gns             | 0,355715316 | 0,00090754 | 0,00453233 |
| BM195033  | chr3  | 119433494 | 119434295 |                 | 0,355595753 | 0,00181519 | 0,00561096 |
| AW542140  | chrX  | 160390544 | 160396252 | Zrsr2           | 0,355508264 | 0,00224056 | 0,00619637 |
| BG063234  | chr8  | 108120629 | 108123201 | AA408456        | 0,353756853 | 0,0021722  | 0,00609772 |
| BM213516  | chr11 | 30007508  | 30098164  | Spnb2           | 0,352212984 | 0,00427143 | 0,00840218 |
| BG068664  | chr13 | 73604697  | 73653870  | Lxcat1          | 0,35151423  | 0,00088817 | 0,00452836 |
| NM_008761 | chr7  | 31817746  | 31826858  | Fcyd5           | 0,351315711 | 0,00300297 | 0,00703551 |
| NM_010590 | chr14 | 55186305  | 55196440  | Jub             | 0,351073498 | 0,00475233 | 0,00889629 |
| AI591480  | chr2  | 164664791 | 164665329 | Pltp            | 0,350926305 | 0,00129037 | 0,00503101 |
| NM_008088 | chr11 | 67416606  | 67498687  | Gas7            | 0,350124519 | 0,00065201 | 0,00419404 |
| AV298377  | chr17 | 24292799  | 24300723  | Amdhd2          | 0,349995918 | 0,00122118 | 0,00493649 |
| AK007560  | chr4  | 60392117  | 60393309  | Efh2            | 0,349917082 | 0,0052146  | 0,00938145 |
| AV156961  | chr4  | 101331624 | 101331967 | Leprot          | 0,349456552 | 0,00093668 | 0,00454525 |
| AK019526  | chr9  | 58150526  | 58152933  |                 | 0,349455341 | 0,00395744 | 0,00804265 |
| AF088862  | chr10 | 127707631 | 127729908 | Stat2           | 0,349419009 | 0,00140279 | 0,0051508  |
| BB256507  | chr5  | 64564941  | 64565499  | Tbc1d1          | 0,349149062 | 0,000311   | 0,00346327 |
| BC013672  | chr8  | 64473211  | 64516498  | Tdx60           | 0,348839424 | 0,00394062 | 0,00803102 |
| AV338483  | chr18 | 23195046  | 23195715  | Nol4            | 0,348747553 | 0,00189199 | 0,00573408 |
| BB338441  | chr15 | 34365804  | 34365996  | Matn2           | 0,348596503 | 0,00037421 | 0,00368458 |
| M11310    | chr8  | 125098532 | 125101600 | Aprt            | 0,34856026  | 0,00283814 | 0,00689763 |
| AV368701  | chr9  | 8994327   | 8996712   | Arhgap42        | 0,348520398 | 0,00582422 | 0,00995499 |
| BG143677  | chr19 | 30140848  | 30141304  |                 | 0,348135297 | 0,00343807 | 0,00751084 |
| BG066200  | chr11 | 115024650 | 115042497 | Slc9a3r1        | 0,347104025 | 0,00275127 | 0,00679293 |
| BC024961  | chr7  | 52785362  | 52809599  | Plekha4         | 0,34708959  | 0,00086742 | 0,00449549 |
| BG070361  | chr1  | 170083662 | 170088059 | Pbx1            | 0,347035462 | 0,00254362 | 0,00651352 |
| BG865910  | chr7  | 25169954  | 25170231  | Kcnn4           | 0,346241366 | 0,00123819 | 0,00497083 |
| NM_023908 | chr7  | 81426741  | 81699666  | Slco3a1         | 0,34559518  | 0,00115795 | 0,00487257 |
| NM_053140 | chr18 | 37633199  | 37635731  | Pcdhb15         | 0,345562842 | 0,00343753 | 0,00751084 |
| NM_009131 | chr7  | 51559144  | 51562301  | Clec11a         | 0,345356911 | 0,00025567 | 0,0033347  |
| AI415371  | chr5  | 65650541  | 65651649  | Wdr19           | 0,345342549 | 0,00285771 | 0,0069258  |
| NM_011336 | chr4  | 42668782  | 42669528  | Ccl27a, Ccl27b, | 0,344884453 | 0,00249829 | 0,0064624  |
| AL359935  | chr9  | 90087978  | 90094938  | Adams7          | 0,343927171 | 0,00177426 | 0,00554838 |
| AV304590  | chr7  | 82897215  | 82899494  | Akap13          | 0,343426911 | 0,00546687 | 0,00961239 |
| BE848253  | chr1  | 191464985 | 191483952 | Cenpf           | 0,343397157 | 0,00247556 | 0,00643795 |
| AW412503  | chr3  | 96405255  | 96428413  | Lix1l           | 0,34291906  | 0,00047512 | 0,00388445 |
| AV075452  | chr2  | 32631309  | 32633114  | Pthr1           | 0,342905987 | 0,00116253 | 0,00487257 |
| BG966339  | chr3  | 148478549 | 148485942 | Lphn2           | 0,342582889 | 0,00484603 | 0,00899225 |
| AK018112  | chr7  | 91081367  | 91083120  | 9930013L23Rik   | 0,342481983 | 0,00555529 | 0,00969329 |
| BB074430  | chr7  | 69494591  | 69494811  | Ndn             | 0,342438069 | 0,0043615  | 0,0084648  |
| AV339681  | chr2  | 34194776  | 34195289  | B930068K11Rik   | 0,342436882 | 0,00122434 | 0,00494173 |
| BG068396  | chr1  | 82877103  | 82877953  | D1Erttd564e     | 0,342203163 | 0,00306108 | 0,00710164 |
| BB464523  | chr5  | 15773670  | 15774425  | Cacna2d1        | 0,341467274 | 0,00340485 | 0,00745327 |
| BB197647  | chr18 | 66217916  | 66218592  | Ccbe1           | 0,34131956  | 0,00419848 | 0,00832602 |
| AK009736  | chr13 | 12709160  | 12742647  | Gpr137b, Gpr13  | 0,341316012 | 0,00285523 | 0,00692389 |
| BE686894  | chr1  | 132343242 | 132344035 | Cd55            | 0,341041687 | 0,00168135 | 0,00543469 |
| NM_011234 | chr2  | 118938549 | 118961809 | Rad51           | 0,340955414 | 0,00104449 | 0,00470106 |
| NM_019971 | chr3  | 80840337  | 81018099  | Pdgfc           | 0,340603461 | 0,00082589 | 0,00446825 |
| BC025084  | chr13 | 101529640 | 101545854 | Cenph           | 0,33947212  | 0,00107314 | 0,00473162 |
| AV350138  | chr1  | 63641919  | 63642850  | Adam23          | 0,339254534 | 0,00183026 | 0,00563746 |
| AV244075  | chr3  | 151460455 | 151461125 | Ptgef           | 0,338528687 | 0,00179072 | 0,0055766  |
| BC016521  | chr15 | 98708208  | 98711752  | Rhebl1          | 0,338500531 | 0,00282853 | 0,00687812 |
| AV220340  | chr3  | 89240632  | 89254866  | Pbxip1          | 0,338443051 | 0,00060209 | 0,00410983 |

|           |       |           |           |                |             |            |            |
|-----------|-------|-----------|-----------|----------------|-------------|------------|------------|
| NM_007472 | chr6  | 55286254  | 55298549  | Aqp1           | 0,33811947  | 0,00099924 | 0,00461114 |
| BB054275  | chr3  | 86882515  | 86883386  | Kirrel         | 0,338046824 | 0,00190071 | 0,00574242 |
| BF228243  | chr4  | 101320329 | 101331969 | Leprot         | 0,337857082 | 0,00323817 | 0,00724554 |
| BQ033755  | chr4  | 145420139 | 145421023 | 1700029I01Rik  | 0,337777468 | 0,00206892 | 0,00597841 |
| NM_007984 | chr5  | 143722042 | 143734862 | Fscn1          | 0,337608937 | 0,00101268 | 0,00464421 |
| NM_024244 | chr10 | 69903657  | 70021678  | Fam13c         | 0,337375005 | 0,00264395 | 0,00666822 |
| L27453    | chr1  | 170088462 | 170361679 | Pbx1           | 0,335280388 | 0,00098905 | 0,00460391 |
| NM_008384 | chr1  | 52846261  | 52874506  | Inpp1          | 0,333844922 | 0,00185567 | 0,00568793 |
| AK003416  | chr2  | 83644570  | 83647071  | Itgav          | 0,333822939 | 0,00210294 | 0,00602843 |
| BB389420  | chr11 | 108040931 | 108041606 |                | 0,333554636 | 0,00152593 | 0,00527283 |
| BB030508  | chr11 | 3232807   | 3233974   | Pik3ip1        | 0,333534985 | 0,00125311 | 0,0049929  |
| BM239828  | chr18 | 60548870  | 60552283  | Iigp1          | 0,333076391 | 0,00512268 | 0,00927765 |
| AV350862  | chr4  | 12092489  | 12093158  | Fam92a         | 0,332894052 | 0,00157965 | 0,00529412 |
| NM_010715 | chr7  | 13862631  | 13896775  | Lig1           | 0,332853675 | 0,00218005 | 0,00610837 |
| BF577853  | chr17 | 24184691  | 24210452  | Kctd5          | 0,332477819 | 0,00078696 | 0,00440434 |
| NM_053142 | chr18 | 37644672  | 37647944  | Pcdhb17        | 0,332459383 | 0,00444734 | 0,00854638 |
| BB008902  | chr6  | 118411967 | 118413221 | Zfp9           | 0,332341878 | 0,00013042 | 0,0031199  |
| BB041150  | chr4  | 118105506 | 118106145 | Cdc20          | 0,332097784 | 9,16E-05   | 0,00305957 |
| AV122249  | chr1  | 138071381 | 138074578 | Kif21b         | 0,331677948 | 0,00457452 | 0,00868712 |
| AV148480  | chr6  | 72907346  | 72907583  | Tmsb10         | 0,331217315 | 0,00026562 | 0,0033347  |
| BB283751  | chr15 | 80042828  | 80045949  | Mgat3          | 0,330842161 | 0,00369922 | 0,00778754 |
| AV291250  | chr4  | 88059648  | 88084832  | Ptplad2        | 0,330639273 | 0,00082913 | 0,00446825 |
| BB174795  | chr18 | 37635393  | 37635994  | Pcdhb15        | 0,33027393  | 0,00382295 | 0,00789885 |
| NM_008892 | chrX  | 90550104  | 90877494  | Pola1          | 0,329599281 | 0,00077211 | 0,00436395 |
| BF682730  | chr2  | 84427255  | 84428271  | D030029J20Rik, | 0,329522755 | 0,0012866  | 0,00503101 |
| BB442784  | chr19 | 53603646  | 53616903  | Dusp5          | 0,329409713 | 0,00186134 | 0,00568882 |
| BG066910  | chr1  | 64160755  | 64161551  | D530037H12Rik  | 0,329171195 | 0,00406589 | 0,0081449  |
| BC024687  | chr3  | 101960620 | 101970896 | Vangl1         | 0,328741387 | 1,97E-05   | 0,0021404  |
| BM220087  | chr10 | 69313010  | 69313475  | Ank3           | 0,328640002 | 0,00100016 | 0,00461114 |
| NM_134090 | chr15 | 79346878  | 79372701  | Kdelr3         | 0,328586474 | 0,00373337 | 0,00782373 |
| AW986176  | chr9  | 61765083  | 61773398  | Kif23          | 0,328386108 | 0,00118347 | 0,00489188 |
| BG793483  | chr9  | 115996809 | 115998926 | Tgfbir2        | 0,327803917 | 0,00201139 | 0,00590233 |
| BB291656  | chr18 | 79273562  | 79274379  |                | 0,327788013 | 3,26E-05   | 0,00252722 |
| BB131963  | chr14 | 64440145  | 64440420  |                | 0,327016424 | 0,0036972  | 0,00778708 |
| BC011103  | chr2  | 130953145 | 130972054 | Hspa12b        | 0,326988091 | 0,00188091 | 0,00572535 |
| BM123508  | chr17 | 81999984  | 82000460  |                | 0,326713959 | 0,00141854 | 0,00518144 |
| AK019611  | chr17 | 83820992  | 83879697  | Eml4           | 0,326357478 | 0,00176798 | 0,00553594 |
| NM_011920 | chr6  | 58590575  | 58642442  | Abcg2          | 0,326312238 | 0,00151372 | 0,00527107 |
| BB261602  | chr11 | 110260435 | 110375010 | Map2k6         | 0,325656968 | 0,001513   | 0,00527107 |
| BB126284  | chr14 | 84858441  | 84859210  | 9630013A20Rik  | 0,325629881 | 0,00299036 | 0,0070317  |
| NM_007910 | chr3  | 89138096  | 89141860  | Efn4           | 0,325570074 | 0,00222518 | 0,00617548 |
| AW049649  | chrX  | 148850832 | 148851243 | 3010001F23Rik  | 0,325368164 | 0,00294803 | 0,00701103 |
| BB257769  | chr8  | 81862299  | 81862549  | Smad1          | 0,325148348 | 0,00068205 | 0,00422116 |
| AK020000  | chr14 | 120798150 | 120800804 | 5830407P18Rik  | 0,324939943 | 0,00417025 | 0,0082984  |
| BB829192  | chr6  | 72047737  | 72104564  | St3gal5        | 0,324431319 | 0,00029171 | 0,00341478 |
| U03425    | chr11 | 16652270  | 16813907  | Egfr           | 0,324324519 | 0,0040733  | 0,00815224 |
| BB726971  | chr13 | 12707323  | 12707668  | Gpr137b, Gpr13 | 0,324041389 | 0,00385855 | 0,00793452 |
| BB259670  | chr5  | 4753839   | 4755597   | Fzd1           | 0,32357454  | 0,00165082 | 0,00541097 |
| BG143445  | chr9  | 71717515  | 71723817  | Tcf12          | 0,323385075 | 0,00365664 | 0,00774672 |
| AK004710  | chr17 | 24776230  | 24787240  | Slc9a3r2       | 0,323159879 | 0,00293215 | 0,00699855 |
| AW744319  | chr2  | 27741929  | 27894243  | Col5a1         | 0,323117322 | 0,00034086 | 0,00358663 |
| BB667197  | chr9  | 58135531  | 58136375  | Loxl1          | 0,322972895 | 0,00320769 | 0,00720683 |
| NM_033075 | chr17 | 35133667  | 35137286  | D17H6S56E-5    | 0,322557887 | 0,00135123 | 0,00511581 |
| AB067535  | chr5  | 121180342 | 121199862 | Oas2           | 0,322051876 | 0,00254149 | 0,00651191 |
| D50563    | chr7  | 52471122  | 52489006  | Tead2          | 0,321921313 | 0,00585725 | 0,00998343 |
| BF147593  | chr3  | 5414495   | 5415856   | Zfhx4          | 0,320614149 | 0,00576567 | 0,00991245 |
| BE853170  | chr2  | 180962323 | 180964492 | BC006779       | 0,320516382 | 0,00314611 | 0,00716661 |
| NM_019731 | chr17 | 26228678  | 26232453  | Nme4           | 0,320385331 | 0,00534656 | 0,00947372 |
| AW543361  | chr12 | 101445549 | 101448027 | Calm1          | 0,320233246 | 0,00314167 | 0,00716611 |
| BB238570  | chr13 | 105282481 | 105283082 |                | 0,319459512 | 0,00361535 | 0,00770775 |
| BB527816  | chr14 | 22319075  | 22491354  | Myst4          | 0,318865518 | 0,0017608  | 0,0055294  |
| NM_013463 | chrX  | 131122894 | 131135505 | Gla            | 0,318722992 | 0,00310455 | 0,00712668 |
| NM_008966 | chr3  | 151462925 | 151500594 | Ptgrfr         | 0,31799368  | 0,00052607 | 0,00398232 |
| BF466442  | chr9  | 60718101  | 60728238  | Uaca           | 0,317571863 | 0,00445168 | 0,0085485  |
| BM242942  | chr2  | 73682670  | 73683574  | Atf2           | 0,316512636 | 0,00150135 | 0,00527107 |
| NM_009684 | chr10 | 90453161  | 90545443  | Apaf1          | 0,315950401 | 0,00371676 | 0,00779821 |
| NM_030887 | chr12 | 86940967  | 86980827  | Jdp2           | 0,315753362 | 0,00409037 | 0,00818262 |
| NM_015776 | chr6  | 122455862 | 122479308 | Mfap5          | 0,315343259 | 0,00153452 | 0,00527283 |
| BG064842  | chr13 | 118009408 | 118062992 | Emb            | 0,313845189 | 0,00511433 | 0,00927242 |
| BB357227  | chr11 | 119146402 | 119146768 | Gaa            | 0,31347776  | 0,00045595 | 0,00386758 |
| BB527979  | chr3  | 86722454  | 86723099  |                | 0,313396289 | 0,00442687 | 0,00852589 |
| BG069767  | chr7  | 106626408 | 106627422 | Rps3           | 0,313305065 | 0,00098755 | 0,00460391 |
| AK009156  | chr11 | 116060190 | 116076632 | 2310004N24Rik  | 0,313071698 | 0,00092248 | 0,00453527 |
| BE989104  | chr15 | 11911090  | 11925744  | Sub1           | 0,313031555 | 0,00171445 | 0,00547087 |
| BB233088  | chr12 | 112692961 | 112693228 | Tnfrif2        | 0,312712761 | 0,00013403 | 0,00312941 |
| AF326545  | chr2  | 32643480  | 32702655  | Stxbp1         | 0,312694338 | 0,00037956 | 0,00368754 |
| BM250739  | chr2  | 59860433  | 59861010  |                | 0,312487416 | 0,002589   | 0,00658556 |
| NM_026667 | chr5  | 65361310  | 65433591  | Fam114a1       | 0,312462508 | 0,00076275 | 0,00436395 |
| BQ176868  | chr2  | 75768704  | 75769407  | Agps           | 0,312343411 | 0,00170072 | 0,00544708 |
| BG072723  | chr8  | 97426768  | 97431709  | Ccdc102a       | 0,312174586 | 0,00270681 | 0,00674065 |
| AW556558  | chr11 | 119338363 | 119348737 | Rnf213         | 0,311760488 | 0,00078568 | 0,00440283 |
| BC024822  | chr6  | 57702255  | 57775119  | Vopp1          | 0,311082685 | 0,00190929 | 0,00574242 |

|           |       |           |           |                 |             |            |            |
|-----------|-------|-----------|-----------|-----------------|-------------|------------|------------|
| AK012980  | chr9  | 87597634  | 87599792  | Tbx18           | 0,311080528 | 0,00070082 | 0,00423321 |
| BM199874  | chr5  | 74931541  | 74994815  | Fip1l1          | 0,311078372 | 0,0051711  | 0,00933808 |
| BE553782  | chr5  | 117803512 | 117805012 | Vsig10          | 0,310824041 | 0,00376839 | 0,00784164 |
| BQ173967  | chr17 | 62953525  | 62956201  | Efna5           | 0,310176222 | 0,00522778 | 0,00938145 |
| BB353853  | chr14 | 78959155  | 78959789  |                 | 0,308362664 | 0,00150761 | 0,00527107 |
| BB528391  | chr2  | 38367246  | 38443561  | Nek6            | 0,30776797  | 0,00144131 | 0,00521482 |
| BC013094  | chr16 | 15623987  | 15637467  | Mcm4            | 0,307592024 | 0,00114692 | 0,00486434 |
| BC011152  | chr13 | 59735989  | 59777146  | Golm1           | 0,307384218 | 0,00131551 | 0,00507697 |
| BB202611  | chr14 | 119314728 | 119315026 | Dzip1           | 0,307122263 | 0,00532933 | 0,00946249 |
| AF288606  | chrX  | 147079852 | 147091942 | Trio            | 0,307090332 | 0,0038169  | 0,00789748 |
| AV321031  | chr5  | 143525480 | 143526147 | Tnrc18          | 0,307048828 | 0,00027024 | 0,00334427 |
| AW743020  | chr7  | 69494505  | 69494811  | Ndn             | 0,306863721 | 0,00022736 | 0,00333347 |
| AK017884  | chr17 | 40252160  | 40254444  | Tgif2           | 0,306678727 | 0,0005189  | 0,00396887 |
| BC006640  | chr6  | 117118552 | 117125087 | Cxcl12          | 0,306437551 | 0,00113989 | 0,00484102 |
| BI964400  | chr1  | 90596244  | 90598718  | Arl4c           | 0,305439807 | 0,00070438 | 0,00424287 |
| BB724741  | chr3  | 121160605 | 121161125 | Cnn3            | 0,304520235 | 1,95E-05   | 0,0021404  |
| C81615    | chr9  | 56139526  | 56140108  | C81615          | 0,304027768 | 0,00251124 | 0,0064624  |
| BM208214  | chr4  | 43970574  | 43992000  | Glipr2          | 0,303749723 | 0,00014283 | 0,00316486 |
| NM_009920 | chr19 | 5092867   | 5098418   | Cnih2           | 0,303505591 | 0,00221921 | 0,00617431 |
| NM_009445 | chr9  | 83729161  | 83765996  | Ttk             | 0,302179983 | 5,41E-05   | 0,00292118 |
| AK017211  | chr13 | 113294909 | 113297049 | Il6st           | 0,302009325 | 0,00172796 | 0,00550186 |
| NM_011777 | chr6  | 42299826  | 42308623  | Zyx             | 0,301639026 | 0,00055047 | 0,00403725 |
| NM_021495 | chr16 | 46446955  | 46497080  | Pvr13           | 0,30142375  | 0,0029068  | 0,00696701 |
| NM_010575 | chr11 | 102314612 | 102331161 | Itga2b          | 0,301219067 | 0,00069319 | 0,00422116 |
| BC006868  | chr4  | 98659318  | 98661649  | Dock7           | 0,300099953 | 0,00049246 | 0,0039286  |
| NM_009517 | chr3  | 32233717  | 32264542  | Zmat3           | 0,299800563 | 0,00571543 | 0,00984614 |
| AV336691  | chr1  | 113755278 | 113757190 | Dsel            | 0,298389774 | 0,0012189  | 0,00493649 |
| AW557006  | chr9  | 35314223  | 35315237  | Cdon            | 0,298105521 | 0,00295422 | 0,00701103 |
| NM_023320 | chr3  | 95792750  | 95800106  | Plekho1         | 0,297952653 | 0,00069704 | 0,00422755 |
| NM_018827 | chr8  | 73017054  | 73027977  | Crlf1           | 0,297944392 | 0,00060854 | 0,00410983 |
| BC016447  | chr2  | 91822484  | 91864302  | Creb31          | 0,297139025 | 0,00257348 | 0,00656675 |
| BB046727  | chr16 | 30955240  | 30957199  | AI480653        | 0,296877569 | 0,00296937 | 0,00702662 |
| AV300794  | chr9  | 106365915 | 106366340 | Pcbp4           | 0,29684156  | 5,16E-05   | 0,00292118 |
| NM_007707 | chr11 | 117827392 | 117830708 | Socs3           | 0,296681115 | 0,00248604 | 0,00644613 |
| AV114522  | chr15 | 99608900  | 99651083  | Lima1           | 0,296473487 | 0,0005072  | 0,00394022 |
| AV228877  | chr15 | 53157378  | 53158121  |                 | 0,295745885 | 0,00275629 | 0,00680146 |
| AK017401  | chr14 | 120796808 | 120798464 | 5830407P18Rik   | 0,295440599 | 0,00023886 | 0,00333347 |
| BG695418  | chr1  | 178950206 | 178951264 | Akt3            | 0,29493215  | 0,00025151 | 0,00333347 |
| BM204832  | chr4  | 106683353 | 106683888 | Ssbp3           | 0,29481156  | 0,00065237 | 0,00419404 |
| BQ174809  | chr7  | 17477395  | 17480785  | Gng8            | 0,294359277 | 0,00483096 | 0,00897474 |
| NM_016715 | chr5  | 109983727 | 109988142 | Crlf2           | 0,294177742 | 0,00510124 | 0,00925812 |
| BI730298  | chr11 | 69499544  | 69509600  | BC096441, Tnfsl | 0,294158372 | 6,43E-05   | 0,00294864 |
| BB504826  | chr1  | 135944491 | 135944736 | Fmod            | 0,294146138 | 0,00106244 | 0,00470833 |
| AV229170  | chr18 | 35830756  | 35831618  | Dnajc18         | 0,293885279 | 9,90E-05   | 0,00305957 |
| BB027682  | chr18 | 37640271  | 37641262  | Pcdhb16         | 0,29355953  | 0,00454976 | 0,0086589  |
| AV326943  | chr6  | 93655540  | 93656090  | Magi1           | 0,293451706 | 0,00193632 | 0,00579349 |
| AV363424  | chr5  | 107641425 | 107642111 |                 | 0,293219916 | 0,00213222 | 0,00604917 |
| BB212341  | chr2  | 118354494 | 118357178 | Bmf             | 0,293103073 | 0,00334797 | 0,00737335 |
| NM_025658 | chr19 | 11611290  | 11633330  | Ms4a4d          | 0,292627042 | 0,00020554 | 0,00326825 |
| BB373962  | chr11 | 16833962  | 16837596  | 2810442I21Rik   | 0,292402996 | 0,00350058 | 0,00756369 |
| BB540053  | chr12 | 66254560  | 66259757  | C79407          | 0,292387796 | 0,00220059 | 0,00614609 |
| NM_008064 | chr11 | 119129276 | 119146768 | Gaa             | 0,292196337 | 0,00049659 | 0,0039286  |
| BE951628  | chr12 | 66233720  | 66249858  | C79407          | 0,292156846 | 0,0035801  | 0,00766308 |
| BE651907  | chr11 | 62592446  | 62597268  | Zfp286          | 0,292120397 | 0,00551784 | 0,00964734 |
| BB703667  | chr16 | 28826261  | 28828667  | 1600021P15Rik   | 0,291187433 | 0,00162169 | 0,00536547 |
| BM205932  | chr1  | 183826518 | 183827073 |                 | 0,291165232 | 0,00550625 | 0,00963871 |
| AK019313  | chr13 | 108606567 | 108606896 | 2900011L18Rik   | 0,291001804 | 0,00150199 | 0,00527107 |
| AW546141  | chr10 | 36853042  | 36858732  | Marcks          | 0,290919115 | 1,91E-07   | 0,0008108  |
| BC019524  | chr2  | 38367333  | 38441284  | Nek6            | 0,29074071  | 0,00480672 | 0,00894796 |
| AK013312  | chr9  | 70255494  | 70269379  | Ccnb2           | 0,290441598 | 0,00061986 | 0,00411626 |
| NM_022417 | chr1  | 87790853  | 87805267  | Itm2c           | 0,289859364 | 0,00361695 | 0,00770775 |
| NM_011369 | chr8  | 4735975   | 4779537   | Shcbp1          | 0,289772984 | 0,00098285 | 0,00460391 |
| BM208058  | chr11 | 3189204   | 3195431   | Patz1           | 0,289549117 | 0,00084415 | 0,00446825 |
| NM_133685 | chr17 | 66001068  | 66122037  | Rab31           | 0,289362526 | 0,00557109 | 0,00970359 |
| AW122203  | chr6  | 36724503  | 36724778  |                 | 0,289121941 | 0,00522968 | 0,00938145 |
| X75483    | chr3  | 36463787  | 36471072  | Ccna2           | 0,289036781 | 0,00331169 | 0,00733195 |
| BQ175052  | chr11 | 62034704  | 62036507  | Specc1          | 0,288734419 | 0,00204194 | 0,00594778 |
| NM_010882 | chr7  | 69491454  | 69494814  | Ndn             | 0,288614362 | 0,00070354 | 0,00424287 |
| NM_008675 | chr4  | 138638205 | 138648892 | Nbl1            | 0,288476359 | 0,00111073 | 0,0047999  |
| AK004359  | chr1  | 134252891 | 134287857 | Tmcc2           | 0,28827847  | 0,0031922  | 0,00718159 |
| BC006935  | chr5  | 114813577 | 114830514 | Kctd10          | 0,288003849 | 0,0016363  | 0,00539343 |
| AV295012  | chr4  | 106584074 | 106722298 | Ssbp3           | 0,287883099 | 0,00346197 | 0,0075365  |
| BG076129  | chr8  | 42418438  | 42419448  | Pcm1            | 0,287614836 | 0,00064288 | 0,00411775 |
| NM_008234 | chr19 | 39005443  | 39042825  | Hells           | 0,287497238 | 5,03E-05   | 0,00292118 |
| BE947500  | chrX  | 71038695  | 71039126  | Pdzd4           | 0,286509524 | 0,00093395 | 0,00453709 |
| NM_009561 | chr7  | 25076063  | 25084609  | Zfp61           | 0,28645293  | 0,00024691 | 0,0033347  |
| BB767243  | chr10 | 12658012  | 12658719  | Stx11           | 0,286329853 | 0,00288356 | 0,00694645 |
| AK014762  | chr19 | 47991749  | 47993692  | Itiprip         | 0,285956975 | 0,00429124 | 0,00841064 |
| NM_030708 | chr3  | 5218661   | 5414656   | Zfhx4           | 0,285723182 | 0,00126121 | 0,00500052 |
| BG066840  | chr14 | 32511962  | 32513174  | Ankrd28         | 0,285520255 | 0,00206755 | 0,00597841 |
| AK017897  | chr10 | 12659786  | 12683888  | Stx11           | 0,285237387 | 0,00505862 | 0,00922207 |
| AK018317  | chr9  | 51660198  | 51661962  | Arhgap20        | 0,284853098 | 0,00431066 | 0,00842159 |

|           |       |           |           |               |             |            |            |
|-----------|-------|-----------|-----------|---------------|-------------|------------|------------|
| BG083485  | chr13 | 29040788  | 29043787  | Sox4          | 0,284598507 | 0,00250167 | 0,0064624  |
| BC014865  | chr4  | 58979388  | 58999987  | Ptgr1         | 0,284527499 | 0,00232806 | 0,00629252 |
| BM235554  | chr5  | 54047535  | 54048600  | Rbpj          | 0,283810526 | 0,00336778 | 0,00740197 |
| AV286396  | chr2  | 59188668  | 59193262  | Pkp4          | 0,283674819 | 0,00217149 | 0,00609772 |
| AI593475  | chr3  | 101959550 | 101960511 | Vangl1        | 0,283540161 | 0,00557616 | 0,00970359 |
| NM_023814 | chr9  | 87599499  | 87626093  | Tbx18         | 0,283276926 | 0,00443379 | 0,00853315 |
| NM_007609 | chr9  | 5308873   | 5336791   | Casp4         | 0,283170916 | 0,0055293  | 0,00965959 |
| BC011068  | chr8  | 122333121 | 122364422 | Cotl1         | 0,282642437 | 0,00578324 | 0,00992358 |
| BB250811  | chr5  | 138046334 | 138046761 | Pcolce        | 0,280632694 | 0,00044293 | 0,00383957 |
| AV021105  | chr6  | 37277254  | 37280598  | Creb3l2       | 0,280573372 | 0,0016956  | 0,00544114 |
| BB364520  | chr18 | 69844765  | 69847579  | Tcf4          | 0,279925535 | 0,00383019 | 0,00789885 |
| NM_016768 | chr2  | 34027428  | 34227556  | Pbx3          | 0,27968698  | 3,03E-05   | 0,00248127 |
| NM_011175 | chr12 | 103632291 | 103678023 | Lgmn          | 0,279238544 | 0,00473699 | 0,00888288 |
| NM_031198 | chr6  | 16783390  | 16848441  | Tcfec         | 0,279063433 | 0,00530082 | 0,00944276 |
| NM_019676 | chr9  | 118980648 | 119002620 | Plcd1         | 0,278903897 | 0,00031393 | 0,0031199  |
| BB612707  | chr17 | 15941318  | 15943205  | Gmb           | 0,278457682 | 0,00192317 | 0,00577186 |
| BQ175287  | chr5  | 143200558 | 143201419 | Tnrc18        | 0,278437417 | 0,00035074 | 0,00358878 |
| NM_009791 | chr1  | 141377545 | 141390668 | Aspm          | 0,27806807  | 0,00375904 | 0,00782998 |
| NM_008512 | chr10 | 126975222 | 127058204 | Lrp1          | 0,277640512 | 0,00238197 | 0,00634332 |
| BB667581  | chr2  | 127985923 | 127986965 | Bcl2l11       | 0,277500062 | 0,0011696  | 0,00487257 |
| BC027080  | chr11 | 98290135  | 98298653  | Erbp2         | 0,27721169  | 0,00084652 | 0,00446825 |
| BC003726  | chr6  | 124791112 | 124807743 | Leprel2       | 0,277125236 | 0,00466776 | 0,00880248 |
| BC004619  | chr4  | 41707067  | 41716349  | Gm13305, Gm2l | 0,27654286  | 0,00067956 | 0,00422116 |
| BB433710  | chr7  | 111489580 | 111493645 | 9230105E10Rik | 0,276167413 | 0,00111778 | 0,00480623 |
| U60884    | chr18 | 32536881  | 32594944  | Bin1          | 0,275998054 | 0,00375808 | 0,00782998 |
| NM_011764 | chr8  | 108939298 | 108949770 | Zfp90         | 0,275396093 | 0,0016861  | 0,00543469 |
| AW047508  | chr6  | 38331468  | 38377647  | Ttc26         | 0,27524724  | 0,00175794 | 0,00552837 |
| BM238675  | chrX  | 160367526 | 160368393 |               | 0,275003141 | 0,00299323 | 0,00703362 |
| NM_008668 | chr10 | 127097974 | 127103734 | Nab2          | 0,274918329 | 0,00039738 | 0,0037847  |
| BB116018  | chr9  | 20711653  | 20711872  | Dnmt1         | 0,27443854  | 0,00154315 | 0,00527283 |
| BB467915  | chr3  | 136373494 | 136374169 |               | 0,274405252 | 0,00032897 | 0,00357125 |
| BB376573  | chr11 | 97702610  | 97705413  | B230217C12Rik | 0,274375772 | 0,00302203 | 0,0070488  |
| AK010420  | chr10 | 80392818  | 80394949  | Gadd45b       | 0,273731809 | 0,00049828 | 0,0039286  |
| AV271901  | chr3  | 28696887  | 28697768  | Eif5a2        | 0,273675843 | 0,00335689 | 0,00738175 |
| NM_010809 | chr9  | 7445821   | 7455972   | Mmp3          | 0,273640751 | 0,00034773 | 0,00358878 |
| AA499047  | chr18 | 61244420  | 61244723  | Pdgfrb        | 0,273514647 | 0,00279143 | 0,00685313 |
| BB449218  | chrX  | 108501487 | 108530752 | Rps6ka6       | 0,273415133 | 0,00047038 | 0,00387701 |
| BB531537  | chr18 | 69794258  | 69794902  |               | 0,272682685 | 0,00289465 | 0,00695193 |
| BB054169  | chr18 | 16929094  | 16929802  |               | 0,27257875  | 0,00583914 | 0,00997224 |
| AV256030  | chr19 | 36693696  | 36695622  | Hectd2        | 0,27232286  | 0,00098644 | 0,00460391 |
| M58566    | chrX  | 35533065  | 35536634  | Zfp3611       | 0,272294548 | 0,00301931 | 0,0070488  |
| BB359162  | chr17 | 83879517  | 83879697  | Eml4          | 0,271946545 | 0,00025221 | 0,0033347  |
| BB361748  | chr17 | 3346621   | 3347209   |               | 0,271814627 | 0,00030859 | 0,00346094 |
| AF357006  | chr9  | 58136407  | 58160991  | Loxl1         | 0,271718556 | 0,00063573 | 0,00415559 |
| AV259620  | chr15 | 9041739   | 9070121   | Skp2          | 0,271602751 | 0,00116574 | 0,00487257 |
| BB529691  | chr14 | 106291163 | 106291820 | Spry2         | 0,271493582 | 0,00425202 | 0,0083915  |
| BB075339  | chr3  | 62333887  | 62334358  | Gpr149        | 0,271182315 | 0,00146924 | 0,0052316  |
| AF291876  | chr3  | 89538759  | 89555097  | Adar          | 0,270693096 | 0,00012418 | 0,00307567 |
| NM_011985 | chr4  | 155024764 | 155027493 | Mmp23         | 0,270534595 | 0,00050023 | 0,0039286  |
| NM_011655 | chr17 | 35971723  | 35975162  | Tubb5         | 0,270422107 | 0,00173398 | 0,00550891 |
| BB283676  | chr3  | 83964360  | 84024796  | Trim2         | 0,270257208 | 0,00195795 | 0,00582205 |
| NM_008903 | chr13 | 113590984 | 113658093 | Ppap2a        | 0,270190714 | 0,00028377 | 0,00338575 |
| BM233746  | chrX  | 71468799  | 71481154  | Flna          | 0,269921163 | 0,00291398 | 0,00697653 |
| BB107412  | chr8  | 36740603  | 36742501  | Mfhas1        | 0,269909938 | 0,00083839 | 0,00446825 |
| AV132173  | chr5  | 30969274  | 30977210  | Cenpa         | 0,269855688 | 0,00326619 | 0,0072744  |
| AW548221  | chr3  | 122241636 | 122243072 | Fnbp1l        | 0,268827941 | 0,00295133 | 0,00701103 |
| NM_138315 | chr10 | 41196119  | 41206834  | Mical1        | 0,2683439   | 0,0046831  | 0,00882079 |
| NM_133978 | chr9  | 114665956 | 114690959 | Cmtm7         | 0,267994445 | 0,00202107 | 0,00592275 |
| BB490338  | chr3  | 121160606 | 121160870 | Cnn3          | 0,267853305 | 0,00021445 | 0,00330265 |
| NM_010135 | chr1  | 183835573 | 183949788 | Enah          | 0,267595359 | 0,00082878 | 0,00446825 |
| BC009151  | chr16 | 35397394  | 35490959  | Pdia5         | 0,267519322 | 0,00118477 | 0,00489188 |
| AV120130  | chr9  | 110523638 | 110526956 | Nradd         | 0,266973787 | 0,00519021 | 0,00935078 |
| NM_023056 | chr6  | 48783706  | 48790987  | Tmem176b      | 0,266921052 | 0,0009317  | 0,0045363  |
| BI903523  | chr5  | 135548772 | 135549560 | Vps37d        | 0,266732403 | 0,00464886 | 0,00877825 |
| AK011311  | chr2  | 152673776 | 152720858 | Tpx2          | 0,266491237 | 0,00014952 | 0,00317481 |
| AV259240  | chr13 | 43218207  | 43231779  | Phactr1       | 0,266232758 | 0,00316154 | 0,00718159 |
| AI639846  | chr18 | 69504170  | 69845346  | Tcf4          | 0,266202311 | 0,00430282 | 0,00841092 |
| BF147705  | chr1  | 156944144 | 156946763 | Ier5          | 0,266162643 | 0,00280239 | 0,00686451 |
| NM_021515 | chr2  | 32485023  | 32490572  | Ak1           | 0,265758916 | 0,00080136 | 0,00442662 |
| C80350    | chr1  | 20793043  | 20793576  | Mcm3          | 0,265323616 | 0,00061392 | 0,00410983 |
| AF083876  | chr16 | 10282933  | 10314060  | Emp2          | 0,265173773 | 0,00349603 | 0,00755831 |
| BI465650  | chr15 | 53146675  | 53147120  |               | 0,264537655 | 0,00019919 | 0,00326825 |
| BB805362  | chr11 | 115042159 | 115042493 | Slc9a3r1      | 0,264520236 | 0,00433818 | 0,00844953 |
| AA500897  | chr7  | 26542292  | 26573574  | Axl           | 0,264412081 | 0,00176351 | 0,00553389 |
| U16321    | chr18 | 69753018  | 69842933  | Tcf4          | 0,264329619 | 0,00298778 | 0,0070317  |
| AV260555  | chr6  | 39412369  | 39439165  | Dennd2a       | 0,26402931  | 0,00119543 | 0,0049118  |
| BG064109  | chr15 | 64021220  | 64022475  |               | 0,263259956 | 0,00361172 | 0,0070777  |
| NM_025863 | chr3  | 68839209  | 68847765  | Trim59        | 0,262780477 | 0,00435502 | 0,0084588  |
| BQ175035  | chr7  | 120714517 | 120715024 | Far1          | 0,262414619 | 0,00312031 | 0,0071399  |
| BM937495  | chr15 | 63918416  | 63919858  |               | 0,262403706 | 0,00355063 | 0,00762631 |
| BB277517  | chr15 | 97623092  | 97674888  | Hdac7         | 0,262346419 | 0,00120982 | 0,0049334  |
| BB398185  | chr1  | 154941165 | 154966396 | Nmnat2        | 0,261316477 | 0,00547862 | 0,00961786 |

|           |       |            |           |               |             |            |            |
|-----------|-------|------------|-----------|---------------|-------------|------------|------------|
| NM_008176 | chr5  | 91320298   | 91322141  | Cxcl1         | 0,260342004 | 0,00514017 | 0,00929769 |
| BC013814  | chr3  | 68696432   | 68777667  | Ift80         | 0,260326665 | 0,00138432 | 0,00512992 |
| NM_012025 | chr15 | 99450955   | 99482031  | Racgap1       | 0,260177841 | 0,00273471 | 0,00678676 |
| BB771515  | chr2  | 125691964  | 125809321 | Galk2         | 0,260027299 | 0,00347454 | 0,00753996 |
| NM_008216 | chr15 | 56497180   | 56526087  | Has2          | 0,259843522 | 0,00069842 | 0,00422755 |
| NM_013726 | chr5  | 8396898    | 8422606   | Dbf4          | 0,259562703 | 0,00458053 | 0,00868874 |
| NM_031257 | chr8  | 26151306   | 26212457  | Plekha2       | 0,259441289 | 0,00149286 | 0,00526257 |
| BB667149  | chr9  | 58064988   | 58065793  | Pml           | 0,259354085 | 0,00286851 | 0,00694035 |
| BB092799  | chr4  | 82141821   | 82143048  | Nfib          | 0,259171682 | 0,00254813 | 0,00652124 |
| BB309795  | chr9  | 74926277   | 74926987  |               | 0,2584971   | 0,00324402 | 0,00724732 |
| AV124445  | chr7  | 69494552   | 69494813  | Ndn           | 0,258118419 | 0,00168684 | 0,00543469 |
| BB513585  | chr5  | 140182646  | 140186178 | Micall2       | 0,257866274 | 0,00211196 | 0,00603178 |
| NM_009877 | chr4  | 88920448   | 88940503  | Cdkn2a        | 0,257167458 | 0,00185268 | 0,00568636 |
| BG073351  | chr9  | 53204037   | 53209973  | Kdelc2        | 0,257046273 | 0,00112294 | 0,00481435 |
| AI448308  | chr17 | 9178994    | 9179513   | Pde10a        | 0,256699075 | 0,00303438 | 0,00706233 |
| NM_019662 | chr8  | 1071551969 | 107155138 | Rrad          | 0,256595006 | 0,00578898 | 0,00992718 |
| BI134721  | chr15 | 84144653   | 84146121  | Parvb         | 0,25659056  | 0,00226573 | 0,00621608 |
| NM_018865 | chr15 | 66722881   | 66754763  | Wisp1         | 0,256196026 | 0,00127545 | 0,00502384 |
| AI553303  | chrX  | 45794658   | 45796288  | 5033418A18Rik | 0,256064649 | 0,00143187 | 0,00519952 |
| BM120925  | chr2  | 127985569  | 127988282 | Bcl2l11       | 0,255999873 | 0,00299908 | 0,00703362 |
| AW558117  | chr6  | 38073175   | 38073780  | D630045J12Rik | 0,255932453 | 0,00122219 | 0,00493649 |
| BB085949  | chr13 | 91844478   | 91845780  | Ssbp2         | 0,255068209 | 0,0029675  | 0,00702662 |
| NM_008566 | chr8  | 77633522   | 77652000  | Mcm5          | 0,254895887 | 0,00298805 | 0,0070317  |
| AF158746  | chr16 | 38742324   | 38768449  | B4galt4       | 0,254850838 | 0,00403548 | 0,00812522 |
| BB103233  | chrX  | 135772121  | 135772874 | Mum11         | 0,254774007 | 0,00070856 | 0,00425409 |
| BQ174518  | chr9  | 75069642   | 75071495  | Myo5a         | 0,254772241 | 0,00155104 | 0,00527283 |
| BB479310  | chr3  | 115975453  | 115976456 | Cdc14a        | 0,254237721 | 0,00351731 | 0,00758474 |
| AK012196  | chr2  | 18763882   | 18919753  | Pip4k2a       | 0,254140816 | 0,00472065 | 0,00886754 |
| NM_011125 | chr2  | 164665020  | 164683127 | Pltp          | 0,25352765  | 0,0034962  | 0,00755831 |
| BB817145  | chr1  | 133182588  | 133185979 | Srgap2        | 0,253405545 | 0,00288486 | 0,00694645 |
| BM224662  | chr15 | 27586024   | 27611270  | Fam105a       | 0,252974698 | 0,00135922 | 0,0051197  |
| BB100920  | chr10 | 36853178   | 36853423  | Marcks        | 0,252211331 | 0,00155103 | 0,00527283 |
| BG069262  | chr5  | 66785038   | 66785854  | AU018552      | 0,25167695  | 0,00525253 | 0,00939915 |
| BB550400  | chr13 | 60275765   | 60278896  | Gas1          | 0,251443297 | 0,00059058 | 0,00410983 |
| BB766215  | chrX  | 156412754  | 156413852 | Sh3kbp1       | 0,250817515 | 0,00054912 | 0,00403725 |
| BB127991  | chr13 | 110341453  | 110342124 |               | 0,250150805 | 0,00281235 | 0,00686486 |
| BB055741  | chr15 | 9041743    | 9042454   | Skp2          | 0,250090125 | 0,00437975 | 0,00848845 |
| BM211413  | chr11 | 98854260   | 98857038  | Top2a         | 0,249899514 | 0,00281179 | 0,00686486 |
| BB375402  |       | NA         | NA        | Ccdc102a      | 0,249857945 | 0,00153413 | 0,00527283 |
| AV172168  | chr3  | 121160798  | 121161123 | Cnn3          | 0,249817249 | 0,00571143 | 0,00984614 |
| BC021314  | chr14 | 24953174   | 24966366  | Dlg5          | 0,249314725 | 0,00085589 | 0,00447452 |
| BC022107  | chr18 | 16747010   | 16967239  | Cdh2          | 0,249031475 | 0,00265863 | 0,00668414 |
| AV024285  | chr13 | 96371736   | 96372000  | F2r           | 0,248678726 | 0,00042026 | 0,00382172 |
| AK002516  | chr6  | 136872046  | 136882296 | Arhgdib       | 0,248544313 | 0,00243858 | 0,00640312 |
| BB266893  | chr9  | 3904398    | 3905785   | 6330407118Rik | 0,248512444 | 0,00368294 | 0,00777151 |
| AY047360  | chr8  | 106774802  | 106787349 | Klfl          | 0,24793262  | 0,00052725 | 0,00398232 |
| AK005223  | chrX  | 160346948  | 160371598 | Ap1s2         | 0,247572847 | 0,00054446 | 0,00402962 |
| AA682050  | chr5  | 64986467   | 64986824  | Gm3716        | 0,247190465 | 0,00492841 | 0,00908493 |
| BI664122  | chr4  | 82140615   | 82141610  |               | 0,247126221 | 0,00405912 | 0,00814152 |
| BB396668  | chr9  | 103086935  | 103087606 | Rab6b         | 0,24703802  | 0,00232062 | 0,00629252 |
| NM_008326 | chr11 | 48678746   | 48684851  | Irgm1         | 0,246746239 | 0,00146522 | 0,00522449 |
| BB203810  | chr11 | 32308821   | 32309473  | Sh3pxd2b      | 0,246724006 | 0,00124841 | 0,00498508 |
| AW542721  | chr5  | 66689589   | 66691463  | Apbb2         | 0,246721441 | 0,00245481 | 0,00641784 |
| BB042558  | chr2  | 52721868   | 52722550  |               | 0,246150914 | 0,0026013  | 0,00659898 |
| NM_080559 | chr4  | 133683320  | 133684704 | Sh3bglr3      | 0,245706001 | 0,00030159 | 0,00346019 |
| NM_009177 | chr15 | 66937848   | 67008266  | St3gal1       | 0,245456623 | 0,00270982 | 0,00674428 |
| NM_007950 | chr5  | 91503647   | 91522675  | Ereg          | 0,245437058 | 0,00571354 | 0,00984614 |
| BG073776  | chr1  | 40423867   | 40424419  | Il1rl2        | 0,245144619 | 0,00402229 | 0,00810343 |
| AV256780  | chr1  | 54702185   | 54703934  | Ankrd44       | 0,245026552 | 0,00433836 | 0,00844953 |
| NM_019631 | chr16 | 56806381   | 56886271  | Tmem45a       | 0,244952683 | 0,00240687 | 0,00636218 |
| AI429655  | chr11 | 51396097   | 51397425  | Col23a1       | 0,244693893 | 0,00233965 | 0,0063034  |
| BI111620  | chr10 | 85763156   | 85812253  | Timp3         | 0,24453197  | 0,00061478 | 0,00410983 |
| L24755    | chr14 | 70874064   | 70919885  | Bmp1          | 0,244140746 | 0,001882   | 0,00572535 |
| BC005686  | chr10 | 92710995   | 92773880  | Elk3          | 0,244102673 | 0,00052046 | 0,00396887 |
| AK003461  | chr10 | 71168418   | 71170616  | Etv5          | 0,243818584 | 0,00345567 | 0,00753205 |
| BC005429  | chr15 | 34236434   | 34366029  | Matn2         | 0,243561836 | 0,00065818 | 0,00419404 |
| NM_053197 | chr19 | 45122105   | 45130872  | Sfxn3         | 0,243459719 | 0,00104408 | 0,00470106 |
| NM_021567 | chr9  | 106356263  | 106366343 | Pcbp4         | 0,243095484 | 0,00380832 | 0,00789101 |
| BC013066  | chr6  | 82980924   | 82983459  | Dok1          | 0,242165458 | 0,00130602 | 0,0050565  |
| BC004702  | chr11 | 117710632  | 117717057 | Birc5         | 0,242086578 | 0,00425087 | 0,0083915  |
| BM119522  | chr9  | 109013978  | 109022427 | Plxnb1        | 0,241919673 | 0,00332074 | 0,0073357  |
| W91617    | chr10 | 79843101   | 79844120  | Mex3d         | 0,241496636 | 0,00293285 | 0,00699855 |
| BG248060  | chr14 | 70879551   | 70891284  | Bmp1          | 0,240067997 | 0,00318873 | 0,00718159 |
| AK004119  | chr5  | 17233524   | 17236085  | Sema3c        | 0,240049694 | 0,0007612  | 0,00436395 |
| BM119343  | chr3  | 38348175   | 38350203  | Ankrd50       | 0,239083256 | 0,00014649 | 0,00316942 |
| AF068749  | chr11 | 116396053  | 116397982 | Sphk1         | 0,238747081 | 0,00010235 | 0,00305957 |
| NM_008809 | chr18 | 61204812   | 61244722  | Pdgfrb        | 0,238740462 | 0,00170401 | 0,0054518  |
| BF227507  | chr6  | 4455713    | 4491535   | Col1a2        | 0,238640366 | 0,00321222 | 0,00720965 |
| BF714880  | chr1  | 155599096  | 155611351 | Rnasel        | 0,238488235 | 0,00109597 | 0,00477414 |
| BC025076  | chr11 | 62462192   | 62478834  | Mmg2t         | 0,237676307 | 0,00124514 | 0,00498205 |
| BB753447  | chr14 | 100265401  | 100265901 | Klf12         | 0,23706096  | 0,00053184 | 0,00400832 |
| NM_011361 | chr10 | 21714494   | 21719709  | Sgk1          | 0,235576086 | 0,00068813 | 0,00422116 |

|           |       |           |           |                 |             |            |            |
|-----------|-------|-----------|-----------|-----------------|-------------|------------|------------|
| AK005167  | chr7  | 31082157  | 31092166  | Clip3           | 0,234413084 | 0,0001901  | 0,00322705 |
| AW553275  | chr9  | 56048937  | 56049923  | C230081A13Rik   | 0,23440924  | 2,74E-05   | 0,00242681 |
| BG963358  | chr2  | 25217010  | 25221169  | Uap1l1          | 0,233466911 | 0,00207782 | 0,00599201 |
| BB185861  | chrX  | 160371150 | 160371299 | Ap1s2           | 0,233401381 | 0,00213488 | 0,00604917 |
| AU021035  | chr15 | 32850477  | 32964690  | Sdc2            | 0,233047348 | 0,00126879 | 0,00500943 |
| BB549503  | chr17 | 87512152  | 87512936  |                 | 0,232160591 | 0,00334054 | 0,0073682  |
| AK010040  | chr6  | 120413247 | 120433749 | Il17ra          | 0,232117146 | 0,00092892 | 0,00453527 |
| BM208224  | chr4  | 155539398 | 155549084 | Agrn            | 0,232010982 | 0,00154351 | 0,00527283 |
| BF580053  | chr1  | 138110100 | 138112698 | 5730559C18Rik   | 0,231583601 | 0,0029822  | 0,00703133 |
| NM_008597 | chr15 | 98676164  | 98679668  | Mgp             | 0,231445593 | 0,00120473 | 0,00492667 |
| NM_023517 | chr11 | 69496078  | 69499031  | BC096441, Tnfsf | 0,231124163 | 0,00156087 | 0,00527283 |
| BB165431  |       | NA        | NA        | Dnmt1           | 0,231048079 | 0,00094149 | 0,00454531 |
| BC010831  | chr6  | 48791492  | 48795364  | Tmem176a        | 0,23103767  | 0,00368574 | 0,00777151 |
| NM_021278 | chrX  | 163645025 | 163645984 | Tmsb4x          | 0,230544955 | 0,00045463 | 0,0038642  |
| BG072806  | chr14 | 117906409 | 117907067 |                 | 0,230455483 | 0,00382524 | 0,00789885 |
| NM_009523 | chr4  | 136833423 | 136852942 | Wnt4            | 0,230305377 | 4,98E-05   | 0,00292118 |
| BE981853  | chr9  | 123168170 | 123170069 | Tmem158         | 0,230040534 | 0,00088975 | 0,00452836 |
| BB022304  | chr15 | 75454565  | 75455723  | Zfp41           | 0,230021401 | 0,0002308  | 0,0033347  |
| AW548716  | chr9  | 49489318  | 49489912  |                 | 0,229941696 | 0,00474489 | 0,00889386 |
| BB145092  | chr6  | 3322256   | 3324308   | Samd9l          | 0,229557107 | 0,00067695 | 0,00422116 |
| NM_011427 | chr2  | 167363704 | 167368314 | Snai1           | 0,229289151 | 0,00527709 | 0,00941806 |
| AV149705  | chr3  | 52845586  | 53065601  | Lhfp            | 0,22913504  | 0,00200891 | 0,00590219 |
| BB367689  | chr6  | 112892162 | 112892805 |                 | 0,228973096 | 0,00148967 | 0,00526086 |
| NM_009808 | chr9  | 5345473   | 5373031   | Casp12          | 0,228639251 | 0,00231923 | 0,00629252 |
| NM_008321 | chr4  | 135699667 | 135701302 | Id3             | 0,227994353 | 0,00124386 | 0,00498205 |
| BB419140  | chr17 | 63208866  | 63209522  | C530014P21Rik   | 0,227988032 | 0,00149026 | 0,00526086 |
| AF205078  | chr8  | 63992042  | 64069936  | Palld           | 0,227848219 | 0,0004822  | 0,00388445 |
| BM122144  | chr12 | 54250951  | 54252000  | Akap6           | 0,227760584 | 9,24E-05   | 0,00305957 |
| AI840824  | chr8  | 72430971  | 72431487  | Gatad2a         | 0,227702968 | 0,00105005 | 0,00470106 |
| AA510713  | chr17 | 875370189 | 875371106 | Socs5           | 0,226840477 | 0,00484915 | 0,00899225 |
| AI549850  | chr5  | 64484178  | 64519572  | Pgm1            | 0,226771305 | 0,00162215 | 0,00536547 |
| AI838132  | chr1  | 63492468  | 63639733  | Adam23          | 0,226372404 | 0,00439926 | 0,00850384 |
| BB480970  | chr1  | 170354571 | 170355250 | Pbx1            | 0,2260118   | 0,00035588 | 0,00358663 |
| AK010452  | chr10 | 126619576 | 126627124 | D10Ert610e      | 0,225847367 | 0,00398808 | 0,00805967 |
| NM_026418 | chr7  | 135517134 | 135561700 | Rgs10           | 0,225668194 | 0,00171008 | 0,00546094 |
| BG070713  | chr7  | 99890204  | 99895626  | Rab30           | 0,225417277 | 0,00357474 | 0,00765916 |
| BC020532  | chr15 | 97575207  | 97598097  | Rapgef3         | 0,225272795 | 0,00079673 | 0,00442254 |
| BB275943  | chr11 | 116667891 | 116668688 | Mxra7           | 0,225185369 | 0,00085977 | 0,00447452 |
| BG064470  | chr6  | 94217841  | 94218494  |                 | 0,225183808 | 0,00310919 | 0,00713323 |
| BM120495  | chr5  | 93522470  | 93604082  | sept-11         | 0,225165079 | 0,00165651 | 0,00542316 |
| BE987651  | chr4  | 21924720  | 21925942  | 6230409E13Rik   | 0,224942785 | 0,00382505 | 0,00789885 |
| BB053254  | chr2  | 34212299  | 34212968  |                 | 0,224183189 | 0,0005353  | 0,00400832 |
| NM_026473 | chr18 | 67550383  | 67562406  | Tubb6           | 0,223982823 | 0,00158875 | 0,00531176 |
| BE571790  | chr16 | 10281841  | 10283712  | Emp2            | 0,22295122  | 0,00165718 | 0,00542316 |
| AK008112  | chr1  | 165177710 | 165192097 | Prrx1           | 0,222740375 | 0,00067852 | 0,00422116 |
| NM_007899 | chr3  | 95538069  | 95543489  | Ecm1            | 0,222268437 | 0,00050403 | 0,00393272 |
| AW536432  | chrX  | 48739813  | 49034558  | Hs6st2          | 0,222123663 | 0,00267295 | 0,00669471 |
| BB833102  | chr3  | 121160772 | 121161113 | Cnn3            | 0,221011754 | 0,00069225 | 0,00422116 |
| BB528896  | chr18 | 69848002  | 69848735  |                 | 0,220722407 | 0,0014221  | 0,00519008 |
| BB817332  | chr12 | 97018450  | 97019339  | Flrt2           | 0,220466292 | 0,00277573 | 0,0068339  |
| AF401530  | chr8  | 106774845 | 106783548 | Cklf            | 0,220427328 | 0,00131763 | 0,00507697 |
| AW123286  | chr15 | 76001403  | 76001755  | Plec            | 0,220236425 | 0,00056786 | 0,00407723 |
| BG073281  | chr17 | 66347262  | 66347771  |                 | 0,220140272 | 0,00375385 | 0,00782998 |
| AV238718  | chr7  | 118615169 | 118699948 | Galnt14         | 0,219858924 | 0,00024129 | 0,0033347  |
| BM211430  | chr7  | 82793803  | 82794575  |                 | 0,218792471 | 0,00538383 | 0,0095126  |
| BB283102  | chrX  | 152005026 | 152005329 | Ptchd1          | 0,21838944  | 0,00274892 | 0,00679144 |
| M74124    | chr1  | 175787340 | 175962187 | Mndal           | 0,218278963 | 0,00118996 | 0,00490781 |
| AV270035  | chr1  | 193361244 | 193362101 | Dtl             | 0,218183665 | 0,00072319 | 0,0042683  |
| BB420529  | chr13 | 108653722 | 108654406 | 9930031P18Rik   | 0,218120156 | 0,00126304 | 0,00500052 |
| BF021001  | chr10 | 83833644  | 83834849  | Nuak1           | 0,21718931  | 0,00493716 | 0,00909459 |
| BM249454  | chr1  | 158354658 | 158355963 |                 | 0,217060633 | 0,00063511 | 0,00415559 |
| NM_054044 | chr8  | 28196044  | 28233906  | Gpr124          | 0,216135057 | 0,00023876 | 0,0033347  |
| AU042744  | chr11 | 69636624  | 69638419  | Nlgn2           | 0,216023475 | 0,00311365 | 0,00713592 |
| AV340788  | chr17 | 81904516  | 81905152  | AI605517        | 0,215821426 | 0,00116129 | 0,00487257 |
| NM_023450 | chrX  | 6989232   | 7000114   | 2010204K13Rik   | 0,215586688 | 0,00164564 | 0,0054015  |
| BB390851  | chr7  | 14208825  | 142089445 |                 | 0,215106049 | 0,00422077 | 0,00835115 |
| U72644    | chr17 | 35322047  | 35325411  | Lst1            | 0,214749995 | 0,00013538 | 0,00314419 |
| BQ044016  | chr1  | 183832577 | 183852189 | Enah            | 0,214688973 | 0,00169636 | 0,00544114 |
| BG069607  | chr14 | 99712636  | 99714254  |                 | 0,214318011 | 0,00053299 | 0,00400832 |
| AF128196  | chr11 | 83388161  | 83392128  | Ccl9            | 0,213903204 | 0,00281202 | 0,00686486 |
| NM_033444 | chr17 | 35187150  | 35195672  | Clic1           | 0,21369351  | 0,00176556 | 0,00553594 |
| U94828    | chr1  | 155587489 | 155592594 | Rgs16           | 0,213629087 | 0,00093344 | 0,00453709 |
| NM_019440 | chr11 | 58028498  | 58036281  | Irgm2           | 0,21349734  | 0,00331398 | 0,00733195 |
| BB291880  | chr7  | 89028846  | 89079359  | Hdgfrp3         | 0,213180887 | 5,60E-07   | 0,0008108  |
| NM_009365 | chr7  | 135391531 | 135397358 | Tgfb1i1         | 0,212817693 | 0,00158876 | 0,00531176 |
| D13695    | chr1  | 40497552  | 40522257  | Il1r1           | 0,212523606 | 0,00082752 | 0,00446825 |
| BB234631  | chr5  | 111883935 | 111886044 | Mn1             | 0,21219977  | 0,00157275 | 0,00528265 |
| BC007478  | chrX  | 132779633 | 132781675 | Wbp5            | 0,212082869 | 0,00273994 | 0,0067881  |
| BF144687  | chr1  | 44608355  | 44853058  | Gulp1           | 0,211991011 | 0,00128848 | 0,00503101 |
| BB219478  | chr8  | 109537459 | 109538130 | Sntb2           | 0,21141725  | 0,00487564 | 0,00902981 |
| BB209438  | chr10 | 41206562  | 41206834  | Mical1          | 0,211064376 | 0,00019525 | 0,00326825 |
| AV113735  | chr18 | 34600224  | 34605212  | Fam13b          | 0,210883774 | 0,00028556 | 0,00338898 |



|           |       |           |           |               |             |            |            |
|-----------|-------|-----------|-----------|---------------|-------------|------------|------------|
| NM_007426 | chr8  | 18691330  | 18741551  | Angpt2        | 0,209530911 | 0,00296083 | 0,00701521 |
| AW553541  | chr7  | 75168747  | 75169876  |               | 0,209354524 | 0,00287441 | 0,00694541 |
| NM_013837 | chr5  | 130577459 | 130611599 | Tpst1         | 0,20933566  | 0,00029152 | 0,00341478 |
| BE943672  | chr2  | 128197845 | 128255086 | Gm14005       | 0,209066672 | 8,23E-05   | 0,00305957 |
| AV162168  | chrX  | 72817383  | 72818632  | Rab39b        | 0,208879093 | 0,00428866 | 0,00841064 |
| BB366156  | chr1  | 183897829 | 183898481 |               | 0,208579605 | 0,00434714 | 0,00845328 |
| AK018128  | chr5  | 150214323 | 150234278 | 6330406115Rik | 0,208546355 | 0,00383767 | 0,00791017 |
| NM_030690 | chr15 | 10498732  | 10643274  | Rai14         | 0,207972546 | 0,00307497 | 0,00710496 |
| NM_011581 | chr17 | 14802498  | 14831242  | Thbs2         | 0,207900481 | 0,00246445 | 0,00642461 |
| NM_023143 | chr6  | 124462421 | 124473458 | C1ra          | 0,207550599 | 0,00144209 | 0,00521482 |
| NM_023132 | chrX  | 71167460  | 71176148  | Renbp         | 0,20725948  | 0,00210853 | 0,00603178 |
| BB079908  | chr11 | 64815540  | 64816601  | AU040829      | 0,207193407 | 0,00317133 | 0,00718159 |
| BC005490  | chr16 | 84954886  | 85083100  | App           | 0,207026162 | 0,00205861 | 0,00597431 |
| NM_009616 | chr11 | 45869493  | 45960845  | Adam19        | 0,206673454 | 0,00255058 | 0,00652365 |
| BG071905  | chr8  | 63990225  | 63992066  | Palld         | 0,206155521 | 0,0005547  | 0,00403725 |
| BM251152  | chr13 | 89794914  | 89881990  | Vcan          | 0,205306328 | 0,00104189 | 0,00470106 |
| AK011936  | chr19 | 57109133  | 57111702  | Ablim1        | 0,204930269 | 0,00557906 | 0,00970359 |
| AK015705  | chr3  | 138523456 | 138565623 | Tspan5        | 0,204577587 | 0,00120157 | 0,00492303 |
| BB053542  | chr14 | 118024267 | 118024976 | Gpc6          | 0,203022989 | 0,00297959 | 0,00702898 |
| BQ176723  | chr1  | 62750278  | 62843555  | Nrp2          | 0,202591423 | 0,00297642 | 0,00702665 |
| BB230275  |       | NA        | NA        | Hectd2        | 0,202565446 | 0,00383943 | 0,00791017 |
| AV290079  | chr15 | 97684855  | 97738728  | Vdr           | 0,202061308 | 0,00397501 | 0,00805807 |
| NM_009014 | chr12 | 80398397  | 80915338  | Rad51l1       | 0,201913601 | 0,0029461  | 0,00701091 |
| BB781435  | chr14 | 20570486  | 20631009  | Nid2          | 0,201824049 | 0,00179017 | 0,00557676 |
| NM_023065 | chr8  | 73286671  | 73290589  | Ifi30         | 0,201774393 | 0,00117355 | 0,00487257 |
| BB183491  | chr7  | 50728276  | 50728834  | Igln5         | 0,201720554 | 0,00565925 | 0,00978428 |
| BB295976  | chr6  | 38237393  | 38238753  | Zc3hav1l      | 0,201452973 | 0,00235568 | 0,00632421 |
| BG068387  | chr3  | 134887991 | 134898097 | Cenpe         | 0,201144612 | 0,00220225 | 0,00614676 |
| AK017798  | chr1  | 44608537  | 44845719  | Gulp1         | 0,201069338 | 0,0029386  | 0,00700458 |
| BB496291  | chr4  | 5726011   | 5727492   | Fam110b       | 0,199922119 | 0,00073098 | 0,0042846  |
| BB008324  | chr16 | 30601215  | 30602883  | Fam43a        | 0,199807134 | 0,00246896 | 0,00642461 |
| NM_010708 | chr11 | 78776896  | 78798356  | Lgals9        | 0,199614026 | 0,00121888 | 0,00493649 |
| BI248650  | chr7  | 108537193 | 108560408 | Arap1         | 0,199599498 | 0,00016058 | 0,0032003  |
| AV329643  | chr2  | 115688810 | 115689010 | Meis2         | 0,19938655  | 0,00206293 | 0,00597431 |
| AF065933  | chr11 | 81849085  | 81850958  | Ccl2          | 0,199294666 | 0,00029924 | 0,00345047 |
| BI248947  | chr6  | 34659484  | 34725466  | Cald1         | 0,199111023 | 1,69E-05   | 0,00209344 |
| BB526903  | chr17 | 12967884  | 12968521  |               | 0,198374707 | 0,00314437 | 0,00716661 |
| AV286717  | chr13 | 105286078 | 105286768 | Adamts6       | 0,198239313 | 0,00095825 | 0,00457829 |
| BE996519  | chrX  | 90994289  | 90995290  | Pcyt1b        | 0,19772744  | 0,00104536 | 0,00470106 |
| NM_008567 | chr1  | 130228172 | 130256276 | Mcm6          | 0,197602075 | 0,00052005 | 0,00396887 |
| BB795075  | chr1  | 171902273 | 171903073 | Ddr2          | 0,197510328 | 0,00325147 | 0,00725648 |
| BB698320  | chr2  | 49627311  | 49630296  | Kif5c         | 0,197120537 | 0,00375676 | 0,00782998 |
| AV332957  | chr3  | 66775216  | 66776307  | Shox2         | 0,197114389 | 0,00078414 | 0,00439991 |
| BB138485  | chr1  | 44853021  | 44853678  | Gulp1         | 0,196789479 | 0,00156516 | 0,00527297 |
| AU040201  | chr6  | 48794664  | 48795363  | Tmem176a      | 0,196713108 | 0,00087734 | 0,0045164  |
| NM_031184 | chr16 | 4608595   | 4615953   | Glis2         | 0,195267669 | 0,00125169 | 0,00499183 |
| BG064061  | chrX  | 139269949 | 139272918 | Tmem164       | 0,194792495 | 0,00033263 | 0,00358582 |
| BB522197  | chr4  | 83919117  | 83919835  | Bnc2          | 0,194507137 | 0,00137741 | 0,00512992 |
| AI314104  | chr3  | 121129419 | 121161125 | Cnn3          | 0,194366973 | 0,00354975 | 0,00762631 |
| AV237721  | chr18 | 69729841  | 69730416  | 4732423E21Rik | 0,193863754 | 0,00100202 | 0,00461483 |
| BB329408  | chr5  | 105948427 | 106037975 | Lrrc8c        | 0,192677498 | 0,00152272 | 0,00527107 |
| AF002823  | chr2  | 127626502 | 127657596 | Bub1          | 0,192174657 | 0,00458132 | 0,00868874 |
| BB439768  | chr18 | 14059048  | 14059694  |               | 0,191717641 | 0,00303188 | 0,00706233 |
| NM_009037 | chr2  | 105226999 | 105239813 | Rcn1          | 0,191243153 | 0,00450469 | 0,00860707 |
| BQ174209  | chr14 | 67421700  | 67423368  | Dpysl2        | 0,190955715 | 0,0002456  | 0,0033347  |
| BB748887  | chr15 | 64118015  | 64119333  | 9130004J05Rik | 0,190893515 | 0,00067651 | 0,00422116 |
| BM208103  | chr8  | 23278618  | 23283807  | Gkcp2         | 0,190839934 | 0,00356691 | 0,00764965 |
| BE951971  | chr15 | 79656237  | 79665118  | Cbx6          | 0,190390051 | 0,00073523 | 0,0042918  |
| BM119078  | chr14 | 118050818 | 118051485 |               | 0,190037363 | 0,00318628 | 0,00718159 |
| AU014694  | chr10 | 126619577 | 126620407 | D10Erttd610e  | 0,189616971 | 0,00242112 | 0,00637481 |
| BC019939  | chr12 | 71991025  | 72003219  | Frmtd6        | 0,188688709 | 0,00288542 | 0,00694645 |
| BB003393  | chr4  | 63659333  | 63660009  | Tnc           | 0,188652745 | 0,0052806  | 0,00941806 |
| BB365661  | chr17 | 12957341  | 12958048  | Airn          | 0,187554918 | 0,00154259 | 0,00527283 |
| NM_138752 | chr7  | 29144623  | 29157642  | Plekkg2       | 0,187321708 | 0,00299536 | 0,00703362 |
| AV245031  | chr13 | 89831953  | 89832164  | Vcan          | 0,187237979 | 0,00234498 | 0,00630994 |
| BC026486  | chr2  | 26175298  | 26203757  | Gpsm1         | 0,18701618  | 0,00491126 | 0,00906486 |
| BG073728  | chr17 | 15955715  | 15957011  | Rgmb          | 0,186961744 | 0,00518641 | 0,00935078 |
| NM_011313 | chr3  | 90417105  | 90418337  | S100a6        | 0,185998127 | 0,00046313 | 0,00387701 |
| NM_026640 | chr19 | 12648003  | 12664258  | Fam111a       | 0,185469003 | 0,00577447 | 0,00991503 |
| AK012411  | chr11 | 75228971  | 75236054  | Serpinf1      | 0,184909339 | 0,00065982 | 0,00419404 |
| NM_008835 | chr9  | 13234580  | 13235958  | Phxr4         | 0,184848469 | 0,00085486 | 0,00447452 |
| BC022679  | chr13 | 117643717 | 117668141 | Parp8         | 0,184717185 | 0,00434829 | 0,00845328 |
| BC019664  | chr13 | 113832960 | 113836620 | Gpx8          | 0,184562326 | 0,00216497 | 0,00608967 |
| NM_021355 | chr1  | 135934036 | 135944863 | Fmod          | 0,184493258 | 0,00521967 | 0,00938145 |
| BM230959  | chr3  | 108970318 | 108971375 | Slc25a24      | 0,184371172 | 0,00125789 | 0,00499819 |
| AW556273  | chr17 | 40254127  | 40255005  | Tgif2         | 0,183831385 | 0,0016958  | 0,00544114 |
| AK004325  | chr14 | 68369984  | 68371519  | Dock5         | 0,183417093 | 0,00018699 | 0,00322705 |
| BG075586  | chr17 | 12944931  | 12945729  | LOC100502594  | 0,183245541 | 0,00041599 | 0,00381145 |
| BI658327  | chr1  | 20792640  | 20810362  | Mcm3          | 0,183047503 | 0,00483084 | 0,00897474 |
| AV292255  | chr16 | 57624368  | 57625104  | Col8a1        | 0,182473643 | 0,00042629 | 0,00382426 |
| BB529332  | chr5  | 5670931   | 5671648   | Steap2        | 0,182278335 | 0,00166515 | 0,00542643 |
| BC025514  | chr9  | 43029985  | 43047994  | Oaf           | 0,181853677 | 0,00127408 | 0,00502384 |

|           |       |           |           |               |             |            |            |
|-----------|-------|-----------|-----------|---------------|-------------|------------|------------|
| BB746807  | chr8  | 90851350  | 90853861  | Adcy7         | 0,181688624 | 0,00393218 | 0,00802512 |
| AW146109  | chr2  | 102651299 | 102652710 | Cd44          | 0,181438183 | 0,00376871 | 0,00784164 |
| BB621938  | chr2  | 103542521 | 103558582 | Abtb2         | 0,181040578 | 3,26E-05   | 0,00252722 |
| M26925    | chr2  | 35257597  | 35316767  | Ggta1         | 0,180994781 | 0,00453729 | 0,00864274 |
| AA822260  | chr6  | 87088731  | 87089152  |               | 0,180913253 | 0,0028989  | 0,00695193 |
| BB482899  | chr4  | 83920998  | 83922163  | Bnc2          | 0,180012625 | 0,00565386 | 0,00978428 |
| NM_133187 | chr3  | 79689877  | 79747306  | Fam198b       | 0,179734591 | 0,00128172 | 0,00503101 |
| AB049755  | chr16 | 23468438  | 23520676  | Masp1         | 0,179131381 | 0,00535906 | 0,00949201 |
| BE133660  | chr18 | 13845517  | 13846292  | Zfp521        | 0,178652747 | 0,00045222 | 0,00386642 |
| AK004377  | chr4  | 151657468 | 151659450 | Gpr153        | 0,178491218 | 0,00228784 | 0,00624279 |
| BB308291  | chr3  | 89548074  | 89549078  | Adar          | 0,177367059 | 0,00353562 | 0,00760912 |
| BG071956  | chrX  | 153881783 | 153882829 | Sms           | 0,176971016 | 0,00291991 | 0,00698686 |
| AK020248  | chr1  | 183886241 | 183949807 | Enah          | 0,176905401 | 0,0045026  | 0,00860707 |
| AV280841  | chr14 | 59967567  | 59972221  | D14Erttd668e  | 0,17643883  | 0,00123956 | 0,00497083 |
| NM_012006 | chr12 | 85350441  | 85358624  | Acot1         | 0,176186465 | 0,00011678 | 0,00307187 |
| NM_007887 | chr7  | 112005528 | 112011179 | Dub1          | 0,176008255 | 0,00546418 | 0,00961239 |
| NM_010730 | chr19 | 20447917  | 20465433  | Anxa1         | 0,175724834 | 0,0011551  | 0,00487049 |
| NM_025367 | chr11 | 116393054 | 116394419 |               | 0,175282637 | 0,00316653 | 0,00718159 |
| NM_011340 | chr11 | 75223270  | 75236126  | Serpinf1      | 0,17471556  | 0,00015438 | 0,00319851 |
| BC009123  | chr17 | 12934239  | 13008423  | Airn          | 0,174575136 | 0,00087894 | 0,0045164  |
| AK013203  | chr5  | 31595258  | 31598280  | Fndc4         | 0,174530369 | 0,00242009 | 0,00637481 |
| BB311718  | chr4  | 147534730 | 147540533 | Fbxo2         | 0,174213702 | 0,00110802 | 0,0047999  |
| BB360125  | chr1  | 11291959  | 11293766  | Prex2         | 0,17411129  | 0,0047504  | 0,00889629 |
| AK017692  | chr9  | 26902821  | 26962997  | Jam3          | 0,173616383 | 0,00171989 | 0,00548016 |
| NM_011905 | chr3  | 83640194  | 83645668  | Tlr2          | 0,173339217 | 0,00014416 | 0,00316942 |
| BC023448  | chr14 | 117324651 | 118375766 | Gpc6          | 0,172838318 | 0,00349392 | 0,00755831 |
| AV154947  | chr2  | 14624694  | 14626344  | Z900072G11Rik | 0,172534287 | 0,00167103 | 0,00543419 |
| BB126796  | chr6  | 119000590 | 119001164 |               | 0,172368733 | 0,00386476 | 0,00794351 |
| BB207647  | chr2  | 115688810 | 115689135 | Meis2         | 0,171980274 | 0,00161982 | 0,00536547 |
| NM_010430 | chr11 | 74978068  | 74983021  | Hic1          | 0,171664068 | 7,47E-05   | 0,00305957 |
| BB312117  | chr10 | 83989050  | 83996520  | Ckap4         | 0,170882907 | 0,00103881 | 0,00470106 |
| BC027199  | chr7  | 73403634  | 73417827  | Lrrk1         | 0,170362534 | 0,00034855 | 0,00358878 |
| AV255921  | chr4  | 11886949  | 11887668  | Pdp1          | 0,169902031 | 0,00395539 | 0,00804265 |
| BG070704  | chr16 | 46436091  | 46496887  | Pvrl3         | 0,169765476 | 0,00548981 | 0,00961792 |
| BB191000  | chr15 | 91098121  | 91099755  | Slc2a13       | 0,169240294 | 0,0040228  | 0,00810343 |
| AI117611  | chrX  | 20281053  | 20297666  | Usp11         | 0,169143542 | 0,00577597 | 0,00991503 |
| BQ174762  | chr11 | 16978471  | 16979376  | Cnrip1        | 0,169047431 | 0,00232275 | 0,00629252 |
| M27130    | chr2  | 102652329 | 102741778 | Cd44          | 0,168224531 | 0,00425275 | 0,0083915  |
| BB472173  | chr12 | 71930243  | 71930914  |               | 0,16768668  | 0,00244435 | 0,00640452 |
| BB464434  |       | NA        | NA        | Sepw1         | 0,16768145  | 0,00168215 | 0,00543469 |
| BC019601  | chr11 | 79052885  | 79055963  | Wsb1          | 0,16760708  | 0,0004856  | 0,00389828 |
| NM_025284 | chr6  | 72907346  | 72908349  | Tmsb10        | 0,166754777 | 0,00104007 | 0,00470106 |
| NM_018764 | chr5  | 58108935  | 58120704  | Pcdh7         | 0,166697572 | 0,00040736 | 0,00379856 |
| BB142324  | chr10 | 56109945  | 56110221  | Gja1          | 0,16661144  | 0,00230674 | 0,0062692  |
| BB645745  | chr11 | 72115166  | 72122239  | Xaf1          | 0,166552625 | 0,00174157 | 0,00552076 |
| BC019942  | chr15 | 79654325  | 79656489  | Cbx6          | 0,166474718 | 0,00111316 | 0,00480136 |
| AV330726  | chr10 | 56110060  | 56110221  | Gja1          | 0,166261957 | 0,00018853 | 0,00322705 |
| NM_130451 | chr2  | 165329407 | 165345417 | Slc2a10       | 0,166090332 | 0,00087069 | 0,00450165 |
| BI793602  | chr17 | 12945642  | 12946580  | LOC100502594  | 0,165393564 | 0,003139   | 0,00716611 |
| NM_007802 | chr3  | 95303167  | 95313307  | Ctsk          | 0,16538382  | 0,00086029 | 0,00447452 |
| AI428101  | chr13 | 29042518  | 29045580  | Sox4          | 0,165315626 | 0,00238132 | 0,00634332 |
| BE990928  | chr2  | 31148735  | 31151509  | Ncs1          | 0,164452176 | 0,00057233 | 0,00408882 |
| NM_026839 | chr6  | 29406327  | 29411888  | Fnc1          | 0,164409435 | 0,00501307 | 0,00917091 |
| BB368203  | chr17 | 13009451  | 13023201  | D17Ertdd663e  | 0,164103737 | 0,00030877 | 0,00346094 |
| AV246296  | chrX  | 94529175  | 94529807  | Eda2r         | 0,163016511 | 0,00082124 | 0,00446825 |
| NM_010790 | chr4  | 44313774  | 44377574  | Melk          | 0,163002387 | 0,00028828 | 0,00339293 |
| L06502    | chr1  | 165175231 | 165243799 | Prrx1         | 0,162942517 | 0,00494203 | 0,00909459 |
| BM228957  | chr17 | 3397189   | 3519396   | Tiam2         | 0,162856138 | 0,00152009 | 0,00527107 |
| BQ174720  | chr7  | 31092272  | 31093385  | Clip3         | 0,162601785 | 0,00016949 | 0,0032003  |
| BB247407  | chr14 | 84859473  | 84876231  | 9630013A20Rik | 0,161889913 | 0,00221119 | 0,00616777 |
| NM_138749 | chr15 | 88985978  | 88997562  | Plxnb2        | 0,161203503 | 7,22E-05   | 0,00304555 |
| BC025198  | chr14 | 120903510 | 120906416 | Rap2a         | 0,160907112 | 0,00013737 | 0,00315651 |
| BQ175154  | chr6  | 3283191   | 3283857   | 9530028C05    | 0,16023431  | 0,00316921 | 0,00718159 |
| NM_008054 | chr10 | 39089581  | 39285187  | Fyn           | 0,160233755 | 0,00057388 | 0,00409256 |
| BM124989  | chr17 | 12959941  | 12960482  | Airn          | 0,159862116 | 0,00315678 | 0,00718159 |
| NM_011653 | chr12 | 4788975   | 4790278   | Tuba1a        | 0,159097713 | 0,00067786 | 0,00422116 |
| NM_008869 | chr1  | 151676747 | 151808417 | Pla2g4a       | 0,158804643 | 0,00039506 | 0,00377921 |
| BM217754  | chr10 | 69487858  | 69490184  | Ank3          | 0,158428633 | 0,00012691 | 0,00309278 |
| BF147024  | chr18 | 14064612  | 14065172  |               | 0,158379773 | 0,00440286 | 0,00850607 |
| BB530515  | chr16 | 4650515   | 4650800   | Vasn          | 0,157980128 | 0,00010214 | 0,00305957 |
| BB817972  | chr5  | 5669453   | 5670625   | Steap2        | 0,1578827   | 0,00025869 | 0,0033347  |
| NM_018750 | chr1  | 133072931 | 133141754 | Rassf5        | 0,157530163 | 0,00333522 | 0,00736142 |
| NM_133983 | chr9  | 58371935  | 58403244  | Cd276         | 0,157463025 | 0,00055799 | 0,00404564 |
| BM211048  | chr1  | 173932700 | 173933956 | Vangl2        | 0,157282493 | 0,002249   | 0,00620152 |
| BC021340  | chr16 | 35832959  | 35845427  | Parp14        | 0,157139742 | 0,00520337 | 0,00936519 |
| NM_009214 | chr3  | 68649906  | 68651817  | Sms           | 0,157073314 | 0,00384566 | 0,00791925 |
| BB484759  | chr16 | 17807721  | 17808386  | Scarf2        | 0,156856802 | 0,002118   | 0,00603178 |
| BC008994  | chr3  | 108187771 | 108189786 | Psirc1        | 0,156279451 | 0,00064447 | 0,0041775  |
| AI315031  | chr11 | 8331660   | 8332257   | Tns3          | 0,155501996 | 0,00044004 | 0,00383854 |
| NM_013813 | chr17 | 69506119  | 69639329  | Epb4.113      | 0,155399094 | 0,00206331 | 0,00597431 |
| BB702754  | chr17 | 56442817  | 56462908  | Uhrf1         | 0,155223619 | 0,00143379 | 0,00520093 |
| AF319976  | chrX  | 147240996 | 147247504 | Maged2        | 0,154984946 | 0,00018339 | 0,00322705 |

|           |       |           |           |                 |             |            |            |
|-----------|-------|-----------|-----------|-----------------|-------------|------------|------------|
| BQ265128  | chrX  | 148778140 | 148778673 | Gpr173          | 0,154911913 | 0,00167919 | 0,00543469 |
| AV022444  | chr6  | 91163900  | 91164222  | Fbln2           | 0,154862528 | 0,00042402 | 0,00382426 |
| AV320517  | chr3  | 52905976  | 52907102  | C130075A20Rik   | 0,154790625 | 0,00479047 | 0,00894454 |
| AK013481  | chr1  | 77363645  | 77365330  | Epha4           | 0,154479253 | 0,00048287 | 0,00388445 |
| AI315673  | chr1  | 54885152  | 54885670  | Ankrd44         | 0,15408411  | 0,0013514  | 0,00511581 |
| BB392869  | chrX  | 131338685 | 131338978 | Armxc2          | 0,154047268 | 0,00020605 | 0,00326825 |
| AF187147  | chr13 | 55575376  | 55589427  | Dbn1            | 0,153921322 | 0,0002158  | 0,00330528 |
| BB503935  | chr5  | 21049281  | 21081718  | Lrrc17          | 0,153351587 | 0,0002591  | 0,00333347 |
| NM_019389 | chr13 | 89796660  | 89871139  | Vcan            | 0,152928585 | 7,66E-05   | 0,00305957 |
| BB045448  | chr16 | 85856425  | 85857463  |                 | 0,152844336 | 0,00011363 | 0,00305957 |
| BC019134  | chr9  | 41392643  | 41394276  |                 | 0,152745311 | 0,00373622 | 0,00782373 |
| BI408855  | chr2  | 84509377  | 84510838  | 2700094K13Rik   | 0,15229706  | 0,00087978 | 0,0045164  |
| AW743924  | chr8  | 95393641  | 95442402  | Lpcat2          | 0,152226349 | 0,0018913  | 0,00573408 |
| BC010581  | chr4  | 134024259 | 134029747 | Stmn1           | 0,151959629 | 6,15E-05   | 0,00294864 |
| BB637972  | chr5  | 20692072  | 20757675  | Pion            | 0,151612436 | 0,0045965  | 0,00870589 |
| BB269897  | chr3  | 55280664  | 55281353  | Dclk1           | 0,150985823 | 0,00481586 | 0,00896114 |
| BF578055  | chr3  | 108926027 | 108970330 | Sic25a24        | 0,150870223 | 0,00534185 | 0,00947312 |
| BG069413  | chr4  | 55540008  | 55545338  | Klf4            | 0,150664351 | 0,00025505 | 0,00333347 |
| BM117918  | chr18 | 23814356  | 23815543  | Dtna            | 0,150543258 | 0,00089739 | 0,00453233 |
| BM122230  | chrX  | 139118850 | 139119428 | Tmem164         | 0,150218562 | 0,00224571 | 0,00619639 |
| BG064656  | chr13 | 60996723  | 60998808  | Ctla2b          | 0,149966275 | 0,00317904 | 0,00718159 |
| AV352983  | chr11 | 104530640 | 104532216 | Itgfb5          | 0,149778245 | 0,00099929 | 0,00461114 |
| BC011310  | chr9  | 49339381  | 49606863  | Ncam1           | 0,149734129 | 0,00303854 | 0,00706824 |
| BB825801  | chr10 | 92710158  | 92711035  | Elk3            | 0,149646973 | 0,00331007 | 0,00733195 |
| BB791906  | chr2  | 125915588 | 125916375 | Fgf7            | 0,149557276 | 0,00078    | 0,00438425 |
| BB080177  | chr15 | 27298686  | 27665260  | Trio            | 0,149321106 | 0,00014052 | 0,00315752 |
| BM213788  | chr6  | 137534863 | 137535625 |                 | 0,149226432 | 0,00524601 | 0,00939523 |
| BB097480  | chr14 | 121667146 | 121682966 | Farp1           | 0,148816871 | 3,91E-05   | 0,00273709 |
| BC026209  | chr5  | 150076342 | 150099729 | Alox5ap         | 0,148563849 | 0,00147397 | 0,00523849 |
| AV020760  | chr7  | 50830245  | 50830831  | Zfp658          | 0,14850259  | 0,00045466 | 0,0038642  |
| NM_019976 | chr3  | 108186760 | 108191149 | Psrc1           | 0,148337473 | 0,0016925  | 0,00544114 |
| BB381558  | chr10 | 80921972  | 80922611  | Celf5           | 0,14804216  | 0,0035685  | 0,00764965 |
| U68384    | chr2  | 115688804 | 115890849 | Meis2           | 0,14792984  | 0,00267466 | 0,00669513 |
| C76969    | chr2  | 73267666  | 73270312  | Wipf1           | 0,147409867 | 0,00054557 | 0,00402962 |
| BM207348  | chr19 | 47968992  | 47971663  | Itrip           | 0,14739352  | 0,00547873 | 0,00961786 |
| BB012037  | chr1  | 180858441 | 180862987 | Kif26b          | 0,147282201 | 0,00137205 | 0,00512992 |
| NM_007494 | chr10 | 61533769  | 61535370  | Ass1            | 0,147077657 | 0,00238968 | 0,00634729 |
| NM_019656 | chrX  | 130425608 | 130432950 | Tspan6          | 0,146923798 | 0,00010847 | 0,00305957 |
| AW491540  | chr4  | 55095421  | 55096435  | Zfp462          | 0,146684669 | 0,00123609 | 0,00497083 |
| BB037433  | chr6  | 34677694  | 34678421  |                 | 0,14657541  | 0,0030481  | 0,00708288 |
| AF378762  | chr6  | 87083846  | 87285815  | Antxr1          | 0,145794177 | 0,00091489 | 0,00453233 |
| AW492145  | chr16 | 84974153  | 84975119  |                 | 0,145685076 | 0,00547755 | 0,00961786 |
| BM117447  | chr9  | 116857044 | 116857619 |                 | 0,145319982 | 0,00064413 | 0,0041775  |
| AW105916  | chr3  | 55046515  | 55273924  | Dclk1           | 0,145224825 | 0,00544927 | 0,00959699 |
| AF481964  | chr6  | 112667964 | 112670977 | Srgap3          | 0,14515287  | 0,00103719 | 0,00470106 |
| BC006583  | chr6  | 29346629  | 29376995  | Cccl136         | 0,145018112 | 0,00132167 | 0,00508416 |
| NM_019391 | chr7  | 149657747 | 149680772 | Lsp1            | 0,144971881 | 0,00077271 | 0,00436395 |
| AW546127  | chr2  | 115861121 | 115861792 |                 | 0,144781583 | 0,00352937 | 0,00759943 |
| BC027120  | chr3  | 124023985 | 124026174 | Tram1l1         | 0,144558966 | 0,0010905  | 0,00476387 |
| L08431    | chr3  | 115825989 | 115832375 | Vcam1           | 0,144426261 | 0,001101   | 0,00478641 |
| AI324988  | chr8  | 77651343  | 77651650  | Mcm5            | 0,144364708 | 0,0024616  | 0,00642461 |
| AF010586  | chr8  | 97296086  | 97306327  | Cx3cl1          | 0,144249178 | 0,0015197  | 0,00527107 |
| BC024358  | chr4  | 43527582  | 43536324  | Tpm2            | 0,144225683 | 0,00368391 | 0,00777151 |
| BB036443  | chr4  | 83916139  | 83916836  |                 | 0,143762071 | 0,00030927 | 0,00346094 |
| BC004724  | chr1  | 71632092  | 71652545  | Fn1             | 0,143747124 | 0,00017324 | 0,0032003  |
| NM_013928 | chr3  | 68376428  | 68430355  | Iqj-schip1, Sch | 0,143548982 | 0,00496014 | 0,00911633 |
| BB333759  | chr5  | 106039477 | 106042038 | Lrrc8c          | 0,143490288 | 0,0050414  | 0,00919949 |
| BM217996  | chr10 | 70387833  | 70622552  | Bicc1           | 0,142963127 | 0,00130582 | 0,00505565 |
| NM_053134 | chr18 | 37560510  | 37563937  | Pcdhb9          | 0,141990863 | 0,00011485 | 0,00305996 |
| BG073335  | chr2  | 115800032 | 115800951 |                 | 0,141793667 | 0,00372389 | 0,0078092  |
| BB138853  | chr15 | 99147652  | 99158325  | Fmnl3           | 0,141292324 | 0,00159547 | 0,00532286 |
| BC026463  | chr6  | 137003339 | 137118227 | Rerg            | 0,141055517 | 0,00105808 | 0,0047024  |
| BC028307  | chrX  | 130442963 | 130466352 | Srpx2           | 0,140992468 | 0,00134853 | 0,00511581 |
| BM123004  | chr11 | 18844815  | 18845402  |                 | 0,140350392 | 0,00397649 | 0,00805807 |
| NM_008608 | chr14 | 55050356  | 55060122  | Mmp14           | 0,139880814 | 0,00013097 | 0,0031199  |
| BC016574  | chr9  | 60435035  | 60535925  | Lrrc49          | 0,139712693 | 0,00140921 | 0,00516307 |
| C76322    | chr1  | 174430179 | 174437507 | Tagln2          | 0,139271793 | 0,00105213 | 0,00470106 |
| AV212626  | chr1  | 174437228 | 174437510 | Tagln2          | 0,139217261 | 0,00037499 | 0,00368458 |
| X17502    | chr6  | 144947672 | 145024601 | Bcat1           | 0,139163715 | 0,0018151  | 0,00561096 |
| AK020118  | chr14 | 118377230 | 118378750 | Gpc6            | 0,139032108 | 0,00092187 | 0,00453527 |
| AV321547  | chr10 | 96946399  | 96947077  | Dcn             | 0,138681284 | 0,00069646 | 0,00422755 |
| AK012006  | chr18 | 35893336  | 35900208  | Tmem173         | 0,138170353 | 0,00046109 | 0,00387701 |
| NM_016765 | chr17 | 35195996  | 35199468  | Ddah2           | 0,137934476 | 0,00034341 | 0,00358663 |
| BB099487  | chr1  | 130228172 | 130228492 | Mcm6            | 0,137343449 | 0,00121432 | 0,0049334  |
| BB311687  | chr13 | 15820930  | 15821859  | Gli3            | 0,137289196 | 0,00489803 | 0,00905968 |
| BB542096  | chr1  | 164151141 | 164153836 | Dnm3os          | 0,13710138  | 0,00175855 | 0,00552837 |
| Z25469    | chr16 | 62854157  | 62929172  | Prosl           | 0,136236011 | 0,0001011  | 0,00305957 |
| BB409477  | chr1  | 62845205  | 62845886  |                 | 0,135904959 | 0,00113299 | 0,00483356 |
| NM_007792 | chr10 | 110357244 | 110376550 | Csrp2           | 0,135434294 | 0,00026797 | 0,00333347 |
| NM_007599 | chr6  | 72494530  | 72512966  | Capg            | 0,135241047 | 0,0006392  | 0,00416196 |
| NM_010164 | chr1  | 14160723  | 14294651  | Eya1            | 0,134947953 | 0,0043516  | 0,00845593 |
| AW495413  | chr5  | 111458506 | 111459017 |                 | 0,134865664 | 0,00035838 | 0,00361968 |

|           |       |           |           |                |             |            |            |
|-----------|-------|-----------|-----------|----------------|-------------|------------|------------|
| BC021308  | chr3  | 108482007 | 108525101 | Gpsm2          | 0,134304542 | 0,00073321 | 0,00428641 |
| BM236743  | chr5  | 103978795 | 104027370 | Ptpn13         | 0,133932686 | 0,00071698 | 0,0042683  |
| NM_007833 | chr10 | 96942185  | 96980797  | Dcn            | 0,133817157 | 0,00128481 | 0,00503101 |
| AV329519  | chr1  | 183840838 | 183841632 | Enah           | 0,133513266 | 0,00562229 | 0,00975144 |
| BB732340  | chr16 | 23468653  | 23469093  | Masp1          | 0,133371286 | 0,00564825 | 0,00978084 |
| BQ176681  | chr8  | 121847350 | 121848829 | Cdh13          | 0,132827889 | 0,00143466 | 0,00520093 |
| AW547821  | chr11 | 18780430  | 18918960  | Meis1          | 0,13211535  | 0,00458145 | 0,00868874 |
| BB121406  | chr13 | 48356456  | 48360229  | Id4            | 0,13210253  | 0,00213803 | 0,00604917 |
| NM_013599 | chr2  | 164773721 | 164781348 | Mmp9           | 0,132100241 | 0,00307195 | 0,00710496 |
| NM_013655 | chr6  | 117118595 | 117131385 | Cxcl12         | 0,132064993 | 8,94E-05   | 0,00305957 |
| NM_010501 | chr19 | 34658020  | 34663526  | Ifit3          | 0,131707098 | 0,00056667 | 0,00407723 |
| BB343142  | chr6  | 34665956  | 34666660  | LOC100503921   | 0,131566582 | 0,00083158 | 0,00446825 |
| BE989096  | chr12 | 36182645  | 36219576  | Ahr            | 0,13104598  | 0,00328214 | 0,00730243 |
| AV378441  | chr7  | 117773098 | 117773333 | Adm            | 0,130334868 | 0,00181649 | 0,00561096 |
| NM_010101 | chr13 | 51504122  | 51515990  | S1pr3          | 0,129862789 | 0,00116444 | 0,00487257 |
| NM_010212 | chr1  | 43179915  | 43220742  | Fhl2           | 0,129802043 | 0,00091836 | 0,00453233 |
| AK008108  | chr2  | 165899655 | 165981105 | Sulf2          | 0,129753917 | 0,0003191  | 0,00349957 |
| AK015015  | chr5  | 5671723   | 5677285   | Steap2         | 0,129652327 | 0,00169989 | 0,00544708 |
| NM_016678 | chr4  | 43888401  | 43957677  | Reck           | 0,128167733 | 0,00349635 | 0,00755831 |
| BB493031  | chr14 | 118375118 | 118376296 | Gpc6           | 0,12739495  | 2,14E-05   | 0,00218426 |
| NM_008515 | chr1  | 92950083  | 93025521  | Lrrfip1        | 0,127143534 | 0,00184742 | 0,00567763 |
| BB536078  | chr3  | 38910579  | 38910905  | Fat4           | 0,127045748 | 4,48E-05   | 0,00283532 |
| AK018466  | chr9  | 116481866 | 116483060 | Rbms3          | 0,126903609 | 0,00228237 | 0,00624279 |
| BB484576  | chr3  | 101265603 | 101266983 | Igfb3          | 0,126664575 | 0,00113995 | 0,00484102 |
| BB111712  | chr8  | 81716407  | 81717171  | Zfp827         | 0,1264146   | 0,00096763 | 0,00459279 |
| AF022889  | chr17 | 75404814  | 75791106  | Ltbp1          | 0,126231161 | 0,00466087 | 0,00879711 |
| BQ175824  | chr9  | 36698564  | 36700318  | Pknox2         | 0,12537964  | 0,00041106 | 0,0038065  |
| NM_013592 | chr2  | 164215145 | 164227464 | Matn4          | 0,125072802 | 0,00330916 | 0,00733195 |
| BC019124  | chr6  | 112223751 | 112280422 | Lmcd1          | 0,12484587  | 0,00088381 | 0,00452426 |
| BG067986  | chr5  | 58523775  | 58524474  | Pcdh7          | 0,124698412 | 0,00136356 | 0,00512602 |
| NM_009946 | chr13 | 54479945  | 54481604  | Cplx2          | 0,124418248 | 0,00570072 | 0,0098325  |
| BB491008  | chr4  | 129192932 | 129193224 | Marcks1        | 0,124143876 | 0,00548169 | 0,00961786 |
| AU020235  | chr2  | 165899411 | 165899712 | Sulf2          | 0,124060865 | 0,00013218 | 0,0031199  |
| BB535404  | chr14 | 55060064  | 55061103  | Mmp14          | 0,124006272 | 0,00253639 | 0,00650651 |
| BB096368  | chr7  | 25647280  | 25647690  | Tmsb10         | 0,12390317  | 0,00076683 | 0,00436395 |
| BB766818  | chr4  | 129725119 | 129776521 | Col16a1        | 0,123538275 | 0,00130349 | 0,0050565  |
| NM_031192 | chr1  | 135247086 | 135256902 | Ren1, Ren2     | 0,122852149 | 0,00504681 | 0,00920549 |
| NM_010496 | chr12 | 25778663  | 25780954  | Id2            | 0,122767024 | 0,00153979 | 0,00527283 |
| AW492556  | chr2  | 115697263 | 115697706 |                | 0,122645397 | 0,00194941 | 0,00581077 |
| NM_009398 | chr2  | 51893632  | 51912206  | Tnfrsf10       | 0,122637322 | 0,00167776 | 0,00543469 |
| AI506234  | chr11 | 67500757  | 67502492  | Gas7           | 0,12251455  | 0,00556379 | 0,00970034 |
| BB055155  | chr11 | 18909786  | 18910414  | Meis1          | 0,122499265 | 0,0033194  | 0,0073357  |
| BB023775  | chr16 | 85155435  | 85156608  |                | 0,122488652 | 0,00340022 | 0,0074512  |
| NM_007945 | chr6  | 137426191 | 137597790 | Eps8           | 0,120568923 | 0,00058412 | 0,00410983 |
| NM_026139 | chrX  | 131338680 | 131343525 | Armxc2         | 0,120508766 | 0,00076909 | 0,00436395 |
| AF297615  | chr2  | 35255700  | 35316969  | Ggt1           | 0,120469513 | 0,0001726  | 0,0032003  |
| BB378317  | chr12 | 114010403 | 114011532 | Ahnak2         | 0,120442378 | 0,0032093  | 0,00720683 |
| BB783125  | chr19 | 8927674   | 8928399   | Lrrn4cl        | 0,12017011  | 8,66E-05   | 0,00305957 |
| BB051738  | chr1  | 165185409 | 165186637 | Prrx1          | 0,120130551 | 0,00068508 | 0,00422116 |
| AW490544  | chr6  | 54456944  | 54516402  | Scrn1          | 0,120118478 | 0,00166554 | 0,00542643 |
| AF177146  | chr17 | 69557221  | 69638455  | Epb4.1l3       | 0,119849434 | 0,00170881 | 0,0054609  |
| NM_133746 | chr19 | 47206272  | 47212781  | Calhm2         | 0,119454243 | 0,00116652 | 0,00487257 |
| BB496399  | chrX  | 6213766   | 6214566   | Shroom4        | 0,119365266 | 0,00061242 | 0,00410983 |
| BM232314  | chr3  | 55342256  | 55342990  | Dclk1          | 0,119218084 | 0,00476641 | 0,00891111 |
| NM_008788 | chr5  | 138046328 | 138052626 | Pcolce         | 0,118754163 | 0,00130633 | 0,0050565  |
| BB053468  | chr11 | 18797401  | 18798055  |                | 0,11840156  | 0,00011834 | 0,00307567 |
| NM_008594 | chr7  | 86278654  | 86293893  | Mfge8          | 0,118310908 | 0,00111994 | 0,00480623 |
| AV264768  | chr18 | 66216508  | 66217239  | Ccbe1          | 0,118066371 | 0,00197347 | 0,00584638 |
| NM_008008 | chr2  | 125860708 | 125915297 | Fgf7           | 0,117962483 | 0,00319215 | 0,00718159 |
| NM_016863 | chr12 | 4839980   | 4848416   | Fkbp1b         | 0,117921607 | 0,00026205 | 0,0033347  |
| BB273882  | chr6  | 13785091  | 13785381  | Gpr85          | 0,117621606 | 0,0009788  | 0,00460358 |
| BB250384  | chr3  | 115812868 | 115832604 | Vcam1          | 0,117062021 | 0,00026487 | 0,0033347  |
| BC022123  | chr6  | 124480362 | 124492320 | C1s            | 0,117051068 | 0,00044162 | 0,00383957 |
| BC010291  | chr7  | 148195487 | 148196621 | Ifitm3         | 0,116759755 | 0,00059471 | 0,00410983 |
| NM_022814 | chr4  | 58055323  | 58219731  | Svep1          | 0,11665257  | 1,18E-05   | 0,00204316 |
| NM_007796 | chr13 | 61036133  | 61037927  | Ctla2a, Ctla2b | 0,115693924 | 0,00317171 | 0,00718159 |
| BM232388  | chr9  | 66875780  | 66878178  | Tpm1           | 0,115526041 | 0,00085857 | 0,00447452 |
| BB698413  | chr9  | 49310238  | 49328239  | Ncam1          | 0,115331219 | 0,00021814 | 0,00331252 |
| BB468437  | chr4  | 99771652  | 99772779  |                | 0,115234531 | 8,76E-05   | 0,00305957 |
| BB732603  | chr6  | 127902599 | 127903049 | Tspan11        | 0,115190209 | 0,00082526 | 0,00446825 |
| BM119387  | chr17 | 6942392   | 6987110   | Ezr            | 0,115179031 | 0,00021134 | 0,00327926 |
| AF263458  | chr5  | 100982744 | 101001244 | Plac8          | 0,115142712 | 0,00072374 | 0,0042683  |
| BM240719  | chr7  | 11557539  | 111613702 | Trim30a        | 0,115087257 | 1,64E-05   | 0,00209344 |
| D67076    | chr16 | 85794071  | 85803356  | Adamts1        | 0,114871276 | 0,0005774  | 0,0040998  |
| AW555664  | chr12 | 97022627  | 97023425  | Flrt2          | 0,114838636 | 0,00365356 | 0,00774672 |
| BM231903  | chr14 | 102333141 | 102333925 | Lmo7           | 0,114397307 | 7,85E-05   | 0,00305957 |
| AF316999  | chr11 | 100556197 | 100565566 | Dhx58          | 0,114054874 | 0,00091382 | 0,00453233 |
| BM234433  | chr11 | 32326168  | 32328184  | Sh3pdx2b       | 0,113885817 | 8,96E-05   | 0,00305957 |
| BB212184  | chr2  | 115821805 | 115822447 | Meis2          | 0,11377575  | 0,00097708 | 0,00460358 |
| BB794635  | chr18 | 44584714  | 44585818  | Mcc            | 0,113743421 | 0,00156376 | 0,00527283 |
| AF309564  | chr12 | 76409365  | 76502443  | Rhoj           | 0,113455622 | 0,0003383  | 0,00358663 |
| NM_019759 | chr1  | 166726774 | 166754405 | Dpt            | 0,113368363 | 0,00031865 | 0,00349957 |

|           |       |           |           |               |             |            |            |
|-----------|-------|-----------|-----------|---------------|-------------|------------|------------|
| AK004767  | chr19 | 10092717  | 10110266  | Rab3il1       | 0,11336797  | 0,0009161  | 0,00453233 |
| NM_023118 | chr15 | 6336600   | 6389598   | Dab2          | 0,113259188 | 0,0004995  | 0,0039286  |
| BB470225  | chr3  | 66024204  | 66025352  | Ptx3          | 0,113167374 | 0,00044255 | 0,00383957 |
| NM_016719 | chr2  | 64750530  | 64860803  | Grb14         | 0,112797735 | 0,00169129 | 0,00544114 |
| BI407690  | chrX  | 132804874 | 132806675 | Ngfrap1       | 0,112752396 | 0,00306801 | 0,00710496 |
| BC019745  | chr19 | 21883764  | 21932850  | Tmem2         | 0,112662945 | 0,0014834  | 0,00525054 |
| AV337593  | chr1  | 66485979  | 66489157  | Mtap2         | 0,112200421 | 2,94E-05   | 0,00245415 |
| NM_010052 | chr12 | 110691715 | 110698835 | Dlk1          | 0,111812237 | 0,00081452 | 0,00446352 |
| BE956581  | chr7  | 52213850  | 52215599  | Cpt1c         | 0,111560252 | 0,00014742 | 0,00316942 |
| BB024472  | chr11 | 50624585  | 50626509  | Zfp354c       | 0,111493383 | 0,00237482 | 0,00634084 |
| BB458819  | chr17 | 68192045  | 68193191  | Arhgap28      | 0,111219372 | 0,00363862 | 0,00772652 |
| U12147    | chr10 | 26701093  | 27336738  | Lama2         | 0,11105067  | 0,00071616 | 0,0042683  |
| BC016890  | chr6  | 137427181 | 137519586 | Eps8          | 0,110985645 | 0,00103852 | 0,00470106 |
| BC026975  | chr6  | 13784406  | 13787241  | Gpr85         | 0,110897981 | 0,00324024 | 0,00724554 |
| AV339304  | chrX  | 120258356 | 120259263 | 3110007F17Rik | 0,110859169 | 0,00027948 | 0,00335304 |
| BB036542  | chr17 | 69620566  | 69621252  | Snai2         | 0,110617765 | 0,00368338 | 0,00777151 |
| NM_011415 | chr16 | 14705935  | 14709481  | Snai2         | 0,110177001 | 0,00364414 | 0,00773155 |
| NM_008610 | chr8  | 95351195  | 95377319  | Mmp2          | 0,110156001 | 0,00040846 | 0,00379856 |
| AK007400  | chr17 | 73289665  | 73291286  | Lbh           | 0,110144167 | 0,00120936 | 0,0049334  |
| BM942851  | chr1  | 148748855 | 148749602 | Fam5c         | 0,109561665 | 0,00318295 | 0,00718159 |
| BM220421  | chr9  | 41399639  | 41400912  | 2610203C20Rik | 0,109559007 | 0,00188286 | 0,00572535 |
| AI509011  | chr14 | 119274741 | 119311728 | Dzip1         | 0,10948499  | 0,00258826 | 0,00658556 |
| NM_018763 | chr9  | 95303926  | 95307679  | Chst2         | 0,109429984 | 0,00138465 | 0,00512992 |
| AV014577  | chr6  | 29411637  | 29411881  | Finc          | 0,109321192 | 0,0028269  | 0,00687812 |
| BB443585  | chr1  | 173180551 | 173190078 | Adamts4       | 0,108640957 | 0,00344972 | 0,00752493 |
| BQ177191  | chr6  | 92320885  | 92322572  | Prickle2      | 0,108372078 | 0,00050445 | 0,00393272 |
| NM_010743 | chr1  | 40496606  | 40504988  | Il1rl1        | 0,108289105 | 0,00397125 | 0,00805807 |
| BB811311  | chrX  | 8844101   | 8845212   | Lancl3        | 0,10805854  | 0,00066442 | 0,00419404 |
| BB038914  | chr3  | 38909789  | 38910909  | Fat4          | 0,107769437 | 0,0030756  | 0,00710496 |
| NM_133903 | chr5  | 33556580  | 33560887  | Spon2         | 0,107503833 | 0,00020132 | 0,00326825 |
| AV319882  | chr16 | 34559623  | 34560462  |               | 0,107118903 | 0,00288086 | 0,00694645 |
| AY043488  | chr11 | 3414880   | 3417354   | Selm          | 0,106930106 | 0,00392851 | 0,00802512 |
| AV223039  | chr14 | 70554211  | 70556294  | 9930012K11Rik | 0,106826761 | 0,00385156 | 0,00792764 |
| AI327078  | chr8  | 122333121 | 122334183 | Cotl1         | 0,106600418 | 0,00185637 | 0,00568793 |
| BB776961  | chr8  | 120807510 | 121847713 | Cdh13         | 0,106583425 | 0,00581996 | 0,00995499 |
| BI110565  | chr3  | 54165031  | 54194963  | Postn         | 0,106533569 | 0,00046079 | 0,00387701 |
| BC024958  | chr11 | 112643503 | 112648598 | Sox9          | 0,106523231 | 1,06E-05   | 0,00204316 |
| NM_009156 | chr7  | 16502556  | 16507685  | Sepw1         | 0,106424336 | 0,00536325 | 0,00949425 |
| BB532532  | chr13 | 51515747  | 51517498  | S1pr3         | 0,106150642 | 0,00169396 | 0,00544114 |
| BB475194  | chr16 | 85859677  | 85861772  | Adamts5       | 0,106047683 | 0,00133364 | 0,00510593 |
| BI452727  | chr16 | 37777124  | 37836606  | Fstl1         | 0,105825558 | 0,00175842 | 0,00552837 |
| NM_010422 | chr13 | 97946147  | 97968322  | Hexb          | 0,105756629 | 0,00042707 | 0,00382426 |
| NM_024169 | chr15 | 98554798  | 98558614  | Fkbp11        | 0,105647095 | 0,00392957 | 0,00802512 |
| NM_008328 | chr1  | 175850530 | 175872523 | Ifi203        | 0,105335234 | 0,00370735 | 0,00779711 |
| AV311104  | chr2  | 121759497 | 121761723 | Casc4         | 0,104589143 | 0,00081961 | 0,00446825 |
| BG073622  | chr1  | 167255549 | 167256870 |               | 0,10361358  | 0,00045132 | 0,0038642  |
| NM_009062 | chr1  | 171671609 | 171677773 | Rgs4          | 0,103539991 | 0,00139184 | 0,00513572 |
| BF147716  | chr8  | 95376459  | 95377318  | Mmp2          | 0,102541869 | 0,00119736 | 0,00491487 |
| BB039269  | chr10 | 56110005  | 56110221  | Gja1          | 0,1024417   | 0,00083936 | 0,00446825 |
| BB155713  | chr5  | 93534979  | 93535797  |               | 0,102055087 | 0,00497566 | 0,00912725 |
| U48235    | chr4  | 58449909  | 58512240  | Lpar1         | 0,102014066 | 0,00390121 | 0,00799196 |
| AV308092  | chr16 | 38598191  | 38599988  | Arhgap31      | 0,101812387 | 2,16E-05   | 0,00218426 |
| AK012169  | chr16 | 4639966   | 4650796   | Vasn          | 0,10181027  | 0,00155983 | 0,00527283 |
| AK018057  | chr16 | 38623275  | 38713012  | Arhgap31      | 0,101527327 | 0,00010512 | 0,00305957 |
| AV215438  | chr4  | 129192857 | 129193219 | Marcks11      | 0,10095855  | 0,00016419 | 0,0032003  |
| BB701578  | chr2  | 4529043   | 4535087   | Frm4a         | 0,100399222 | 0,00037108 | 0,00368458 |
| BC002065  | chr12 | 105474358 | 105480149 | Serpina3g     | 0,100078224 | 0,00227572 | 0,00623955 |
| NM_010237 | chr10 | 34203325  | 34328382  | Frk           | 0,099698458 | 0,00069133 | 0,00422116 |
| NM_013691 | chr3  | 89019128  | 89030757  | Thbs3         | 0,099594508 | 0,00135346 | 0,00511581 |
| BB221015  | chr5  | 75579228  | 75579544  | Pdgfra        | 0,09947653  | 0,00203607 | 0,00593921 |
| BF228318  | chr6  | 91183055  | 91222533  | Fbln2         | 0,099461707 | 0,00049362 | 0,0039286  |
| NM_007631 | chr7  | 152115835 | 152126195 | Ccmd1         | 0,099068828 | 0,00049619 | 0,0039286  |
| BG064671  | chr1  | 173190010 | 173190768 | Adamts4       | 0,098808571 | 0,00084121 | 0,00446825 |
| NM_007825 | chr3  | 17972140  | 18143288  | Cyp7b1        | 0,098735315 | 0,00052223 | 0,00397202 |
| AV225808  | chr13 | 97946286  | 97946811  | Hexb          | 0,098676134 | 1,93E-05   | 0,0021404  |
| AK019971  | chr2  | 30690491  | 30736742  | Prrx2         | 0,097952424 | 0,00039395 | 0,00377684 |
| BB051952  | chr9  | 49496850  | 49497544  |               | 0,097585797 | 0,00457459 | 0,00868712 |
| NM_009866 | chr8  | 105156833 | 105309011 | Cdh11         | 0,096969174 | 0,00052022 | 0,00396887 |
| BE952757  | chr3  | 95974512  | 95975639  | Mtmr11        | 0,09684625  | 0,00579681 | 0,00993203 |
| NM_134072 | chr13 | 4048278   | 4090066   | Akr1c14       | 0,096685275 | 0,00107211 | 0,00473162 |
| D78264    | chr2  | 28048511  | 28085982  | Olfm1         | 0,095797379 | 0,00350965 | 0,00757199 |
| BM124348  | chr2  | 115871952 | 115872579 |               | 0,095500361 | 0,00229296 | 0,00624406 |
| BB658835  | chr16 | 85861605  | 85900597  | Adamts5       | 0,095209543 | 0,00164484 | 0,0054015  |
| BB427399  | chr16 | 31305632  | 31306425  |               | 0,094941654 | 0,00012422 | 0,00307567 |
| BM233698  | chr3  | 107543972 | 107563140 | Csf1          | 0,094675504 | 0,0001215  | 0,00307567 |
| NM_009152 | chr5  | 13399308  | 13603485  | Sema3a        | 0,093983415 | 0,00087067 | 0,00450165 |
| BB197591  | chr5  | 58522090  | 58523170  | Pcdh7         | 0,093727421 | 7,72E-06   | 0,0018591  |
| M63801    | chr10 | 56097078  | 56110229  | Gja1          | 0,093506794 | 0,00185886 | 0,00568793 |
| BB128517  | chr1  | 133585271 | 133610044 | 5430435G22Rik | 0,092917233 | 0,000108   | 0,00305957 |
| BB831042  | chr10 | 34330295  | 34331034  | Frk           | 0,092858964 | 0,00267    | 0,00669471 |
| D14636    | chr17 | 44740937  | 44873597  | Runx2         | 0,092812311 | 0,00083146 | 0,00446825 |
| BG076276  | chr6  | 100755491 | 100756662 |               | 0,09277372  | 0,0030868  | 0,00711546 |

|           |       |           |           |                   |             |            |            |
|-----------|-------|-----------|-----------|-------------------|-------------|------------|------------|
| BC010197  | chr8  | 67071338  | 67171983  | Cpe               | 0,092455951 | 0,00293815 | 0,00700458 |
| BI794771  | chr11 | 94813923  | 94814360  | Col1a1            | 0,091706322 | 0,00053991 | 0,00401508 |
| AF031524  | chr13 | 88961102  | 89460155  | Edil3             | 0,091605625 | 0,00341061 | 0,00746211 |
| BC024141  | chr1  | 192771524 | 192802877 | Vash2             | 0,09160499  | 0,003939   | 0,00803102 |
| BB040443  | chr16 | 14709184  | 14709475  | Snai2             | 0,089080595 | 0,00064985 | 0,00419404 |
| AY083458  | chr9  | 78463352  | 78563144  | Cd109             | 0,08871673  | 0,00137325 | 0,00512992 |
| NM_013512 | chr18 | 33956607  | 34166859  | Epb4.1l4a         | 0,088683222 | 0,00108318 | 0,00475177 |
| AU067681  | chr10 | 81050200  | 81053218  | Tle2              | 0,088159509 | 0,00029952 | 0,00345047 |
| AV246882  | chr9  | 78562728  | 78564067  | Cd109             | 0,086971709 | 0,0025007  | 0,0064624  |
| BG072085  | chr4  | 13711928  | 13818307  | Runx1t1           | 0,086256082 | 0,00153952 | 0,00527283 |
| BG065737  | chr19 | 10111922  | 10112578  | Rab3il1           | 0,08616137  | 0,00239396 | 0,00634729 |
| NM_008607 | chr9  | 7272527   | 7283333   | Mmp13             | 0,086135693 | 0,00289708 | 0,00695193 |
| AK004179  | chr8  | 42011563  | 42076139  | Pdgfrl            | 0,086057814 | 0,00131722 | 0,00507697 |
| AV229143  | chr1  | 175892699 | 175892942 | Ifi202b           | 0,085817757 | 0,00055003 | 0,00403725 |
| AF047838  | chr3  | 144392640 | 144423919 | Clca1             | 0,084607244 | 0,00119107 | 0,00490781 |
| AV224446  | chr10 | 24492212  | 24528000  | Enpp3             | 0,084119553 | 0,00016202 | 0,0032003  |
| NM_026235 | chr9  | 60560923  | 60586630  | Larp6             | 0,084085159 | 0,00166079 | 0,00542316 |
| AW537708  | chr5  | 75548360  | 75594231  | Pdgfra            | 0,083691505 | 0,00230493 | 0,00626821 |
| BM119567  | chr1  | 180868585 | 180869330 | A730054J21Rik     | 0,083505209 | 0,00069396 | 0,00422116 |
| BB732600  | chrX  | 130216630 | 130220168 | Pcdh19            | 0,083141351 | 0,00242279 | 0,00637481 |
| NM_080553 | chr17 | 27247526  | 27259167  | Itrp3             | 0,083044015 | 9,54E-05   | 0,00305957 |
| AV238324  | chr13 | 51517303  | 51517499  | S1pr3             | 0,082856001 | 0,00024868 | 0,0033347  |
| BB524346  | chr5  | 65193263  | 65195229  | LOC100504048      | 0,082491827 | 0,0057973  | 0,00993203 |
| BC008532  | chr17 | 32350615  | 32362569  | Bst2              | 0,082488396 | 0,0019725  | 0,00584638 |
| BB748621  | chr2  | 178221624 | 178222072 | Cdh26             | 0,08239982  | 0,00040344 | 0,00379856 |
| BM238658  | chr6  | 115739680 | 115755284 | Cand2             | 0,081974272 | 0,00251604 | 0,0064696  |
| AK011545  | chr15 | 25292897  | 25343480  | Basp1             | 0,081627552 | 0,0004158  | 0,00381145 |
| BC028528  | chr3  | 95687895  | 95695884  | BC028528          | 0,081504018 | 0,00235611 | 0,00632421 |
| BB003660  | chr2  | 32185109  | 32185726  |                   | 0,080640869 | 0,00548995 | 0,00961792 |
| AV271771  | chr8  | 107904393 | 107906760 | Plekhh4           | 0,080315096 | 0,00087601 | 0,0045164  |
| BC001999  | chr7  | 53173396  | 53176774  | Emp3              | 0,080043885 | 0,00045396 | 0,0038642  |
| X75557    | chr13 | 13275040  | 13284103  | Prl2c2, Prl2c3, P | 0,079957102 | 0,00050529 | 0,00393272 |
| BB546141  | chr6  | 127900196 | 127901018 | Tspan11           | 0,079939923 | 0,00477571 | 0,00892082 |
| BB757120  | chr3  | 55274689  | 55275239  | Dclk1             | 0,07947225  | 0,00045095 | 0,0038642  |
| BM201198  | chr9  | 49449694  | 49450226  | Ncam1             | 0,079104852 | 0,00235574 | 0,00632421 |
| AF220015  | chr7  | 11557541  | 115656286 | Trim30a           | 0,078677504 | 0,00071343 | 0,00426781 |
| AI594683  | chr7  | 74877486  | 74878317  | Synn              | 0,077501068 | 0,00496461 | 0,00911889 |
| BF466917  | chr6  | 54455883  | 54456899  | Scrn1             | 0,077433679 | 0,00236393 | 0,00632983 |
| L31397    | chr2  | 32163990  | 32208801  | Dnm1              | 0,076739065 | 0,0034669  | 0,00753968 |
| BB084936  | chr3  | 126141540 | 126143293 | Arsj              | 0,076348837 | 0,00125489 | 0,00499328 |
| BB458645  | chr9  | 96723757  | 96724018  | Acpl2             | 0,076267383 | 0,00068566 | 0,00422116 |
| M22479    | chr9  | 66870396  | 66897142  | Tpm1              | 0,075868246 | 0,00072531 | 0,0042683  |
| BB787292  | chr10 | 34203204  | 34330134  | Frk               | 0,074866546 | 0,00286686 | 0,00694023 |
| BB540658  | chr16 | 37777160  | 37794628  |                   | 0,074525864 | 0,00024398 | 0,0033347  |
| BM125019  | chr11 | 50602155  | 50617856  | Adamts2           | 0,074361259 | 0,00035341 | 0,00359447 |
| BB752129  | chr1  | 62864242  | 62865266  | Nrp2              | 0,073978507 | 0,00125551 | 0,00499328 |
| U80888    | chrX  | 141883235 | 141885825 | Arsj              | 0,073892154 | 0,00208373 | 0,0060009  |
| AW120464  | chr12 | 110701009 | 110701546 | Dlk1              | 0,072926653 | 0,00013622 | 0,00314692 |
| BB760085  | chr1  | 14159034  | 14159517  | Eya1              | 0,072437221 | 0,00012425 | 0,00307567 |
| BM232966  | chr19 | 17297784  | 17298424  | Prune2            | 0,072400828 | 0,00042935 | 0,00382629 |
| BC025602  | chr7  | 52338282  | 52347542  | Rcn3              | 0,071724012 | 0,00210849 | 0,00603178 |
| BG068242  | chr7  | 111619663 | 111621052 | Trim30d           | 0,071699904 | 0,00144801 | 0,00522274 |
| BC025600  | chr5  | 114243737 | 114250481 | Tmem119           | 0,069737091 | 0,0002993  | 0,00345047 |
| AV323033  | chr18 | 22851319  | 22853492  | Nol4              | 0,069227785 | 0,00347923 | 0,00754378 |
| BC002064  | chr6  | 36664927  | 36761361  | Ptn               | 0,068950986 | 0,00024306 | 0,0033347  |
| NM_054042 | chr19 | 5068108   | 5070643   | Cd248             | 0,068815149 | 0,00232661 | 0,00629252 |
| NM_007581 | chr15 | 98465491  | 98474960  | Cacnb3            | 0,068495594 | 0,00236128 | 0,00632983 |
| AK019325  | chr17 | 46543871  | 46545118  | Gm9706, Isg15     | 0,068293875 | 0,00024072 | 0,0033347  |
| NM_008332 | chr19 | 34625401  | 34651024  | Ifit2             | 0,068162403 | 0,00244182 | 0,00640387 |
| BI555209  | chr19 | 37973528  | 38017968  | Myof              | 0,067988757 | 0,00030975 | 0,00346094 |
| U70622    | chr4  | 58447855  | 58566425  | Lpar1             | 0,066998843 | 0,00092644 | 0,00453527 |
| BC005569  | chr14 | 51710772  | 51725822  | Rnase4            | 0,066644055 | 0,00050917 | 0,00394174 |
| AK014140  | chr3  | 49556342  | 49559386  | Pcdh18            | 0,06598537  | 0,00250962 | 0,0064624  |
| AI837704  | chr8  | 98238379  | 98238856  | Ndrp4             | 0,065648916 | 0,00224189 | 0,00619637 |
| NM_007392 | chr19 | 34315413  | 34329810  | Acta2             | 0,065552972 | 0,00137635 | 0,00512992 |
| BC010465  | chr6  | 17015162  | 17055823  | Tes               | 0,065293356 | 0,00054354 | 0,00402962 |
| AK007972  | chr2  | 156601166 | 156607394 | Myl9              | 0,065284984 | 0,00097736 | 0,00460358 |
| BQ033138  | chr5  | 115347521 | 115362239 | Oasl2             | 0,064850432 | 0,00077574 | 0,00437538 |
| AV300631  | chr8  | 105155994 | 105156627 |                   | 0,063925041 | 0,00569445 | 0,00982948 |
| AW550878  | chr4  | 13818087  | 13819770  | Runx1t1           | 0,063654221 | 0,00421091 | 0,00833924 |
| BC015254  | chr1  | 92100574  | 92112863  | Cxcr7             | 0,063341946 | 0,00405254 | 0,00813391 |
| NM_010807 | chr4  | 129190874 | 129193223 | Marcks1           | 0,063339092 | 0,00285533 | 0,00692389 |
| AV028402  | chr9  | 43853761  | 43856662  | Thy1              | 0,063258142 | 0,00141014 | 0,00516307 |
| AK014780  | chr9  | 50889219  | 50910067  | 4833427G06Rik     | 0,062175499 | 0,00046789 | 0,00387701 |
| AV352375  | chr8  | 118225331 | 118226437 | Maf               | 0,061759505 | 0,00061561 | 0,00410983 |
| AV312368  |       | NA        | NA        |                   | 0,060734707 | 0,00080893 | 0,00444707 |
| NM_053123 | chrX  | 45162876  | 45245719  | Smarca1           | 0,060475097 | 0,00139425 | 0,00514025 |
| BC024872  | chr16 | 23601814  | 23614303  | Rtp4              | 0,060435707 | 0,00188468 | 0,00572535 |
| U88064    | chr7  | 89111539  | 89137178  | Bnc1              | 0,060191142 | 0,00141114 | 0,00516307 |
| AV327778  | chr4  | 13818007  | 13818310  | Runx1t1           | 0,059821587 | 0,00096329 | 0,00458346 |
| NM_011940 | chr1  | 175892745 | 175912845 | Ifi202b           | 0,059767707 | 8,63E-05   | 0,00305957 |
| NM_013586 | chr6  | 82984166  | 83001396  | Lox13             | 0,059394164 | 0,00022899 | 0,0033347  |

|           |       |           |           |                |             |            |            |
|-----------|-------|-----------|-----------|----------------|-------------|------------|------------|
| D00208    | chr3  | 90405825  | 90409967  | S100a4         | 0,058871166 | 0,00027391 | 0,00335093 |
| BB298032  | chr1  | 14291282  | 14291951  | Eya1           | 0,058493698 | 0,00010832 | 0,00305957 |
| BB820441  | chr17 | 45699669  | 45700115  | Nfkbie         | 0,058319615 | 0,00411912 | 0,00822119 |
| BB398886  | chr10 | 107769147 | 107851902 | Pawr           | 0,058289305 | 0,00278273 | 0,00683949 |
| BB160417  | chr8  | 122333121 | 122333386 | Cotl1          | 0,057700195 | 0,00251175 | 0,0064624  |
| X79989    | chr4  | 13670582  | 13817297  | Runx1t1        | 0,057559585 | 8,04E-05   | 0,00305957 |
| BB426294  | chr18 | 60753636  | 60760149  | Synp           | 0,057299446 | 0,00017243 | 0,0032003  |
| AK003144  | chr9  | 20770395  | 20772039  | S1pr2          | 0,057227603 | 0,00011017 | 0,00305957 |
| BC017540  | chr10 | 34017230  | 34021126  | Tspyl4         | 0,057005503 | 0,00069342 | 0,00422116 |
| BM234765  | chr13 | 111185267 | 111191048 | Plk2           | 0,056551731 | 0,00532176 | 0,00945679 |
| BC015293  | chr2  | 113588831 | 113598803 | Grem1          | 0,056230045 | 0,00096934 | 0,0045959  |
| AK007603  | chr3  | 134944190 | 134967390 | Bdh2           | 0,055969319 | 0,00066396 | 0,00419404 |
| AK002271  | chr9  | 66875699  | 66896951  | Tpm1           | 0,055706327 | 0,0004083  | 0,00379856 |
| AV300716  |       | NA        | NA        | Tmem173        | 0,055434195 | 0,00049869 | 0,0039286  |
| BC011193  | chr15 | 5183399   | 5194186   | Ptger4         | 0,055202982 | 0,00205023 | 0,00596394 |
| BI663014  | chr10 | 79451373  | 79458131  | Cnn2           | 0,054979973 | 0,00032594 | 0,00355665 |
| NM_009636 | chr11 | 5761949   | 5772242   | Aebp1          | 0,054143051 | 0,00174534 | 0,00552076 |
| D85596    | chr7  | 117911719 | 117955919 | Ampd3          | 0,053885839 | 0,0012892  | 0,00503101 |
| BB550907  | chrX  | 97931678  | 97934233  | Gdpd2          | 0,053638214 | 0,00015728 | 0,0032003  |
| NM_024217 | chr8  | 106864573 | 106872145 | Cmtm3          | 0,053538851 | 0,0005794  | 0,00410335 |
| BM115577  | chrX  | 130117410 | 130119293 | Pcdh19         | 0,053390801 | 0,00362614 | 0,00771976 |
| NM_027052 | chr15 | 96826890  | 96861644  | Slc38a4        | 0,053254971 | 0,00452052 | 0,00862849 |
| NM_007993 | chr2  | 125125860 | 125333729 | Fbn1           | 0,052276088 | 0,00358916 | 0,00767868 |
| BM240385  | chr7  | 89026135  | 89026702  | Hdgfrp3        | 0,052117258 | 5,08E-05   | 0,00292118 |
| AK014019  | chrX  | 120217167 | 120257246 | 3110007F17Rik  | 0,051697381 | 0,0004651  | 0,00387701 |
| BC008107  | chrX  | 20447389  | 20451859  | Timp1          | 0,051425046 | 0,00325313 | 0,00725648 |
| AV110584  | chr4  | 129192921 | 129193218 | Marcks1        | 0,050707045 | 0,00126785 | 0,00500943 |
| AV296474  | chr6  | 36689456  | 36690131  | Ptn            | 0,050423497 | 0,00061514 | 0,00410983 |
| U73910    | chrX  | 153596617 | 153853218 | PheX           | 0,050335149 | 0,00162145 | 0,00536547 |
| BI155559  | chr8  | 4257645   | 4259273   | Ctxn1          | 0,050199437 | 0,00074922 | 0,00432122 |
| BF019883  | chr12 | 25778723  | 25779703  | Id2            | 0,049534586 | 0,00273798 | 0,00678727 |
| BB039510  | chr10 | 24492887  | 24493211  | Enpp3          | 0,049329005 | 0,00328995 | 0,00730857 |
| NM_007470 | chr16 | 31297034  | 31314877  | Apod           | 0,047794387 | 0,00061713 | 0,00410983 |
| BC024556  | chr14 | 70564034  | 70575235  | Pdlim2         | 0,047654458 | 0,00056783 | 0,00407723 |
| U08020    | chr11 | 94797566  | 94813523  | Col1a1         | 0,047441716 | 0,00013385 | 0,00312941 |
| AV278332  | chr6  | 100737202 | 100755072 | Gmylt2         | 0,047259396 | 0,00202719 | 0,00593667 |
| BG067039  | chrX  | 141880965 | 141883551 | Axol1          | 0,047221085 | 0,00015059 | 0,00317481 |
| BB532202  | chr1  | 135944511 | 135944738 | Fmod           | 0,047091484 | 0,00040606 | 0,00379856 |
| BQ177170  | chr3  | 57091027  | 57099115  | Tm4sf1         | 0,047085283 | 0,00259438 | 0,00658601 |
| NM_008087 | chr7  | 59134519  | 59249885  | Gas2           | 0,046734767 | 0,00079938 | 0,00442254 |
| AF007248  | chr2  | 125127171 | 125332168 | Fbn1           | 0,046732175 | 0,00438475 | 0,00848996 |
| AY061807  | chr9  | 62705901  | 62723728  | Calml4         | 0,04491045  | 1,28E-05   | 0,00209344 |
| AK019472  | chr16 | 57549363  | 57573235  | Filip1l        | 0,043844661 | 0,00370436 | 0,00779459 |
| AW702161  | chr5  | 97222433  | 97274987  | Anxa3          | 0,043213923 | 0,00269545 | 0,00672004 |
| NM_011171 | chr2  | 155576998 | 155581196 | Procr          | 0,043182034 | 0,00307375 | 0,00710496 |
| BB535262  | chr6  | 127837606 | 127900237 | Tspan11        | 0,043065911 | 0,00010979 | 0,00305957 |
| BF168458  | chr11 | 118162374 | 118163734 | Timp2          | 0,043045911 | 0,00061654 | 0,00410983 |
| NM_008331 | chr19 | 34715360  | 34724499  | Ifit1          | 0,041614353 | 0,00268905 | 0,00671547 |
| NM_009255 | chr1  | 79790803  | 79855252  | Serpine2       | 0,040881162 | 0,00194378 | 0,00580195 |
| BB053591  | chrX  | 130121674 | 130122948 | Pcdh19         | 0,040792281 | 0,00228386 | 0,00624279 |
| AK012666  | chr14 | 27919446  | 27920470  | Il17rd         | 0,040024994 | 0,00055548 | 0,00403725 |
| NM_012043 | chr9  | 58004073  | 58006990  | Isir           | 0,039923444 | 0,00022952 | 0,00333347 |
| BB487754  | chr1  | 95197585  | 95197642  | Sned1          | 0,039367666 | 0,00063726 | 0,00415559 |
| BM241342  | chr3  | 20106727  | 20107731  | Trim30d        | 0,038698193 | 0,0001817  | 0,00322705 |
| BM240693  | chr8  | 118206838 | 118207570 | Maf            | 0,036815319 | 0,00043751 | 0,00383854 |
| BC021376  | chr18 | 13846135  | 14131144  | Zfp521         | 0,036436419 | 0,000538   | 0,0040147  |
| X58380    | chr1  | 178765656 | 178768819 | Hmga2          | 0,035769159 | 0,00319311 | 0,00718159 |
| BB344065  | chrX  | 120902832 | 120903578 | LOC552908      | 0,035501161 | 0,00131863 | 0,00507697 |
| AK005158  | chr17 | 43705663  | 43744585  | Pla2g7         | 0,035016532 | 0,00020445 | 0,00326825 |
| M65143    | chr18 | 52675715  | 52689414  | Lox            | 0,034551448 | 0,00055554 | 0,00403725 |
| BB520073  | chr2  | 36086010  | 36107790  | Ptgs1          | 0,034457098 | 0,00012265 | 0,00307567 |
| BB628935  | chr10 | 68996913  | 69488293  | Ank3           | 0,034221339 | 0,00307321 | 0,00710496 |
| NM_009468 | chr18 | 43483653  | 43553033  | Dpysl3         | 0,033791753 | 0,00018894 | 0,00322705 |
| NM_009263 | chr5  | 104864160 | 104870069 | Spp1           | 0,033749501 | 9,95E-07   | 0,00089557 |
| NM_023123 | chr7  | 149761435 | 149764027 | H19            | 0,0328016   | 0,00461838 | 0,0087397  |
| BG963150  | chr5  | 48376031  | 48697706  | Slit2          | 0,032759338 | 0,00094216 | 0,00454531 |
| BB329808  | chr3  | 151393888 | 151412911 | Ifi44          | 0,032691854 | 0,0002365  | 0,0033347  |
| BB377340  | chr13 | 89461492  | 89462469  | Edil3          | 0,032613769 | 0,00036638 | 0,00366973 |
| BB328287  | chr6  | 100760087 | 100760907 | AI256396, LOC1 | 0,031854257 | 0,00046598 | 0,00387701 |
| NM_011607 | chr4  | 63620821  | 63708015  | Tnc            | 0,031693922 | 0,00306744 | 0,00710496 |
| BC027319  | chr1  | 166367239 | 166388662 | Atp1b1         | 0,031104562 | 0,00020611 | 0,00326825 |
| AK009847  | chr7  | 96657618  | 96666049  | Prss23         | 0,030510402 | 0,00223999 | 0,00619637 |
| M93954    | chr11 | 118163131 | 118216687 | Timp2          | 0,030454411 | 0,00020722 | 0,0032726  |
| AV162270  | chr18 | 43480642  | 43483678  | Dpysl3         | 0,030140873 | 0,00042597 | 0,00382426 |
| BB378796  | chr7  | 96657609  | 96657905  | Prss23         | 0,029519048 | 0,00117308 | 0,00487257 |
| NM_009721 | chr1  | 166368205 | 166387985 | Atp1b1         | 0,029394193 | 0,00305977 | 0,00710164 |
| BQ177165  | chr9  | 85735986  | 85740662  | Tpbp           | 0,027133331 | 0,00017476 | 0,0032003  |
| AV323441  | chr8  | 118206838 | 118207077 | Maf            | 0,026856591 | 0,00091457 | 0,00453233 |
| NM_008872 | chr8  | 23868213  | 23893320  | Plat           | 0,026424958 | 0,00024949 | 0,0033347  |
| BB011882  | chr16 | 65865765  | 65866611  | Vgll3          | 0,026324957 | 2,33E-05   | 0,00228372 |
| BB542051  | chr13 | 49703358  | 49719873  | Ogn            | 0,026151908 | 0,00011576 | 0,00306551 |
| BB444134  | chr13 | 115242470 | 115243548 | Fst            | 0,026008374 | 0,0009106  | 0,00453233 |

|           |       |           |           |         |             |            |            |
|-----------|-------|-----------|-----------|---------|-------------|------------|------------|
| NM_010329 | chr4  | 142857330 | 142889382 | Pdpm    | 0,025757922 | 0,00206343 | 0,00597431 |
| AK003626  | chr15 | 96825242  | 96826810  | Slc38a4 | 0,025180313 | 0,00022427 | 0,00332788 |
| BB037474  | chr6  | 87528586  | 87529649  | Prokr1  | 0,024425129 | 0,00167022 | 0,00543419 |
| NM_008987 | chr3  | 66023828  | 66029727  | Ptx3    | 0,023834084 | 0,00215665 | 0,00608202 |
| AV253284  | chr16 | 45746342  | 45772390  | Phldb2  | 0,02374611  | 0,00163206 | 0,00539013 |
| AA833146  | chr2  | 36107248  | 36107792  | Ptgs1   | 0,022917365 | 0,0002653  | 0,0033347  |
| BG066866  | chr16 | 65828857  | 65862220  | Vgll3   | 0,022890218 | 2,29E-06   | 0,00110601 |
| NM_009141 | chr5  | 91188403  | 91190650  | Cxcl5   | 0,020328957 | 0,00087799 | 0,0045164  |
| BB363188  | chr5  | 99360240  | 99360966  | Prkg2   | 0,018453202 | 0,00030619 | 0,00346094 |
| NM_008046 | chr13 | 115243551 | 115249157 | Fst     | 0,015655409 | 0,00128307 | 0,00503101 |
| NM_011859 | chr12 | 9581279   | 9588305   | Osr1    | 0,011865404 | 0,00105195 | 0,00470106 |
| AV152334  | chr1  | 166367276 | 166368410 | Atp1b1  | 0,00693629  | 0,00055272 | 0,00403725 |
| BB823350  | chr5  | 99358719  | 99360237  | Prkg2   | 0,006209875 | 0,0001803  | 0,00322705 |
