# Supplementary material for: Dynamic hydroxymethylation of deoxyribonucleic acid marks differentiation-associated enhancers
Source: PubMed Central journal article supplement — Nucleic Acids Res. 2012 Jun 21;40(17):8255–65. doi: 10.1093/nar/gks595 (PMC3458548; doi:10.1093/nar/gks595), 2012-06-21
Supplement: supp_gks595_nar-01065-v-2012-File007.pdf [file supp_gks595_nar-01065-v-2012-File007.pdf]

Supplementary Table 4: 5hmC-up regions in P19 cells treated with RA for 48 hrs (mm8)

| chr  | Start    | Stop     |
|------|----------|----------|
| chr7 | 4462891  | 4462976  |
| chr7 | 4498301  | 4498436  |
| chr7 | 5884381  | 5884656  |
| chr7 | 5884691  | 5884796  |
| chr7 | 5890791  | 5890866  |
| chr7 | 6378041  | 6378146  |
| chr7 | 6388331  | 6388516  |
| chr7 | 6388811  | 6388956  |
| chr7 | 6403311  | 6403406  |
| chr7 | 6417741  | 6417846  |
| chr7 | 6419191  | 6419316  |
| chr7 | 6426811  | 6426936  |
| chr7 | 6442181  | 6442426  |
| chr7 | 6454581  | 6454726  |
| chr7 | 6460041  | 6460446  |
| chr7 | 6463101  | 6463306  |
| chr7 | 6499561  | 6499686  |
| chr7 | 6514541  | 6514696  |
| chr7 | 6514771  | 6514996  |
| chr7 | 6517951  | 6518096  |
| chr7 | 6537311  | 6537456  |
| chr7 | 10734321 | 10734456 |
| chr7 | 11910741 | 11910906 |
| chr7 | 15329541 | 15329646 |
| chr7 | 15890731 | 15890846 |
| chr7 | 15913691 | 15913816 |
| chr7 | 15914201 | 15914506 |
| chr7 | 18118381 | 18118506 |
| chr7 | 24171761 | 24171926 |
| chr7 | 24528771 | 24528866 |
| chr7 | 24660061 | 24660206 |
| chr7 | 24661261 | 24661406 |
| chr7 | 24662301 | 24662436 |
| chr7 | 24758461 | 24758606 |
| chr7 | 24797251 | 24797556 |
| chr7 | 24797601 | 24797876 |
| chr7 | 24798751 | 24798906 |
| chr7 | 24858521 | 24858656 |
| chr7 | 24859171 | 24859426 |
| chr7 | 24862361 | 24862536 |
| chr7 | 24983441 | 24983636 |
| chr7 | 25159041 | 25159236 |
| chr7 | 25335281 | 25335386 |
| chr7 | 25616021 | 25616116 |
| chr7 | 27141761 | 27141856 |
| chr7 | 27215871 | 27215956 |
| chr7 | 27315761 | 27315886 |
| chr7 | 27316151 | 27316416 |
| chr7 | 27905471 | 27905646 |

|      |          |          |
|------|----------|----------|
| chr7 | 28401511 | 28401626 |
| chr7 | 28511331 | 28511426 |
| chr7 | 28511681 | 28511806 |
| chr7 | 28627361 | 28627546 |
| chr7 | 28632791 | 28632926 |
| chr7 | 29000321 | 29000616 |
| chr7 | 29205111 | 29205176 |
| chr7 | 29875261 | 29875496 |
| chr7 | 29905021 | 29905236 |
| chr7 | 30037151 | 30037246 |
| chr7 | 30040331 | 30040556 |
| chr7 | 30067861 | 30068016 |
| chr7 | 30202201 | 30202296 |
| chr7 | 30321761 | 30321876 |
| chr7 | 30439351 | 30439456 |
| chr7 | 30520651 | 30520806 |
| chr7 | 30563541 | 30563646 |
| chr7 | 30667001 | 30667196 |
| chr7 | 30854301 | 30854526 |
| chr7 | 30854711 | 30854916 |
| chr7 | 33979041 | 33979176 |
| chr7 | 34049351 | 34049526 |
| chr7 | 34303351 | 34303456 |
| chr7 | 34315651 | 34315756 |
| chr7 | 34403761 | 34403856 |
| chr7 | 34411611 | 34411816 |
| chr7 | 34425461 | 34425556 |
| chr7 | 34430711 | 34430786 |
| chr7 | 34430791 | 34430916 |
| chr7 | 34460631 | 34460756 |
| chr7 | 34461091 | 34461296 |
| chr7 | 34461361 | 34461496 |
| chr7 | 34506871 | 34507046 |
| chr7 | 34513531 | 34513676 |
| chr7 | 34578731 | 34578846 |
| chr7 | 34619201 | 34619356 |
| chr7 | 34647421 | 34647566 |
| chr7 | 34648171 | 34648306 |
| chr7 | 34648551 | 34648976 |
| chr7 | 35072021 | 35072176 |
| chr7 | 35079801 | 35080016 |
| chr7 | 35220861 | 35221016 |
| chr7 | 35629691 | 35629876 |
| chr7 | 35630211 | 35630306 |
| chr7 | 35631861 | 35632016 |
| chr7 | 35647091 | 35647216 |
| chr7 | 35647311 | 35647436 |
| chr7 | 35679191 | 35679286 |
| chr7 | 35725781 | 35726176 |
| chr7 | 35783031 | 35783156 |
| chr7 | 35842801 | 35842976 |
| chr7 | 35859761 | 35859886 |
| chr7 | 35860101 | 35860266 |

|      |          |          |
|------|----------|----------|
| chr7 | 35861621 | 35861766 |
| chr7 | 36038511 | 36038606 |
| chr7 | 36256821 | 36256976 |
| chr7 | 36409201 | 36409356 |
| chr7 | 36415641 | 36415746 |
| chr7 | 36416191 | 36416416 |
| chr7 | 36416601 | 36417216 |
| chr7 | 36417401 | 36417526 |
| chr7 | 36419171 | 36419416 |
| chr7 | 36440261 | 36440396 |
| chr7 | 36585191 | 36585326 |
| chr7 | 36585411 | 36585596 |
| chr7 | 36586571 | 36586676 |
| chr7 | 36599471 | 36599606 |
| chr7 | 36650011 | 36650126 |
| chr7 | 36681981 | 36682106 |
| chr7 | 36682271 | 36682366 |
| chr7 | 36853331 | 36853476 |
| chr7 | 36877781 | 36877966 |
| chr7 | 36888681 | 36888876 |
| chr7 | 36889361 | 36889596 |
| chr7 | 37051491 | 37051596 |
| chr7 | 37051911 | 37052046 |
| chr7 | 37070691 | 37070786 |
| chr7 | 37072761 | 37072866 |
| chr7 | 37073351 | 37073446 |
| chr7 | 37085071 | 37085206 |
| chr7 | 37086761 | 37086926 |
| chr7 | 37140351 | 37140466 |
| chr7 | 37141991 | 37142156 |
| chr7 | 37182511 | 37182786 |
| chr7 | 37182791 | 37182926 |
| chr7 | 37253041 | 37253186 |
| chr7 | 37272701 | 37272856 |
| chr7 | 37273411 | 37273776 |
| chr7 | 37274841 | 37275046 |
| chr7 | 37397951 | 37398206 |
| chr7 | 37398491 | 37398606 |
| chr7 | 37399371 | 37399496 |
| chr7 | 37399531 | 37399666 |
| chr7 | 37454931 | 37455076 |
| chr7 | 37455291 | 37455466 |
| chr7 | 37680021 | 37680126 |
| chr7 | 37821351 | 37821506 |
| chr7 | 39428231 | 39428386 |
| chr7 | 39502331 | 39502446 |
| chr7 | 41285871 | 41285996 |
| chr7 | 43350191 | 43350296 |
| chr7 | 43491991 | 43492226 |
| chr7 | 43728761 | 43728876 |
| chr7 | 44131441 | 44131656 |
| chr7 | 44155951 | 44156096 |
| chr7 | 44225231 | 44225496 |

|      |          |          |
|------|----------|----------|
| chr7 | 44962281 | 44962526 |
| chr7 | 45154461 | 45154596 |
| chr7 | 45154691 | 45154806 |
| chr7 | 45328971 | 45329316 |
| chr7 | 45329621 | 45329806 |
| chr7 | 45459991 | 45460086 |
| chr7 | 45576291 | 45576376 |
| chr7 | 45931131 | 45931256 |
| chr7 | 45991011 | 45991156 |
| chr7 | 45996521 | 45996606 |
| chr7 | 46006491 | 46006646 |
| chr7 | 46022981 | 46023106 |
| chr7 | 46029761 | 46029866 |
| chr7 | 46045681 | 46045816 |
| chr7 | 46055351 | 46055476 |
| chr7 | 46372631 | 46372756 |
| chr7 | 46529771 | 46529896 |
| chr7 | 46530061 | 46530126 |
| chr7 | 46545091 | 46545236 |
| chr7 | 46790371 | 46790476 |
| chr7 | 48746011 | 48746136 |
| chr7 | 48746301 | 48746426 |
| chr7 | 48761571 | 48761716 |
| chr7 | 48815241 | 48815456 |
| chr7 | 48815571 | 48815776 |
| chr7 | 48831841 | 48832006 |
| chr7 | 48860051 | 48860166 |
| chr7 | 48863281 | 48863396 |
| chr7 | 48881661 | 48881826 |
| chr7 | 48886661 | 48886886 |
| chr7 | 48937321 | 48937536 |
| chr7 | 48937571 | 48937806 |
| chr7 | 48937971 | 48938086 |
| chr7 | 48940781 | 48940926 |
| chr7 | 48988371 | 48988506 |
| chr7 | 49068071 | 49068246 |
| chr7 | 49166771 | 49166896 |
| chr7 | 49202611 | 49202706 |
| chr7 | 49211371 | 49211476 |
| chr7 | 49211691 | 49211856 |
| chr7 | 49243651 | 49243756 |
| chr7 | 49258121 | 49258236 |
| chr7 | 49304641 | 49304746 |
| chr7 | 49306001 | 49306236 |
| chr7 | 49317561 | 49317656 |
| chr7 | 49318371 | 49318446 |
| chr7 | 49343501 | 49343596 |
| chr7 | 49395881 | 49396006 |
| chr7 | 49403091 | 49403256 |
| chr7 | 49413251 | 49413406 |
| chr7 | 49529981 | 49530096 |
| chr7 | 49567841 | 49568166 |
| chr7 | 49572491 | 49572656 |

|      |          |          |
|------|----------|----------|
| chr7 | 49573481 | 49573696 |
| chr7 | 49577771 | 49577966 |
| chr7 | 49578051 | 49578206 |
| chr7 | 49655271 | 49655386 |
| chr7 | 49702161 | 49702266 |
| chr7 | 49791531 | 49791666 |
| chr7 | 49973691 | 49973846 |
| chr7 | 50154331 | 50154496 |
| chr7 | 50160721 | 50160816 |
| chr7 | 50188381 | 50188536 |
| chr7 | 51590671 | 51590886 |
| chr7 | 51592101 | 51592316 |
| chr7 | 51622461 | 51622576 |
| chr7 | 56466441 | 56466596 |
| chr7 | 56545201 | 56545326 |
| chr7 | 58656511 | 58656616 |
| chr7 | 61187341 | 61187466 |
| chr7 | 61819131 | 61819266 |
| chr7 | 62140811 | 62141076 |
| chr7 | 62988521 | 62988636 |
| chr7 | 64105581 | 64105656 |
| chr7 | 64397951 | 64398056 |
| chr7 | 64505501 | 64505766 |
| chr7 | 64618301 | 64618656 |
| chr7 | 64683161 | 64683286 |
| chr7 | 64951951 | 64952106 |
| chr7 | 65036221 | 65036326 |
| chr7 | 65158391 | 65158486 |
| chr7 | 65272731 | 65272996 |
| chr7 | 65294681 | 65294796 |
| chr7 | 65344741 | 65344866 |
| chr7 | 65348761 | 65348896 |
| chr7 | 65424761 | 65424946 |
| chr7 | 65460281 | 65460406 |
| chr7 | 65743521 | 65743646 |
| chr7 | 65995671 | 65995936 |
| chr7 | 66659401 | 66659576 |
| chr7 | 66755281 | 66755416 |
| chr7 | 67021421 | 67021566 |
| chr7 | 67021611 | 67021706 |
| chr7 | 67023741 | 67023906 |
| chr7 | 67090421 | 67090536 |
| chr7 | 67090941 | 67091126 |
| chr7 | 67342471 | 67342656 |
| chr7 | 67577851 | 67578036 |
| chr7 | 67589801 | 67589916 |
| chr7 | 67598711 | 67598836 |
| chr7 | 67670721 | 67670866 |
| chr7 | 67842031 | 67842206 |
| chr7 | 67846771 | 67847036 |
| chr7 | 67852831 | 67852986 |
| chr7 | 67938271 | 67938456 |
| chr7 | 68022291 | 68022456 |

|      |          |          |
|------|----------|----------|
| chr7 | 68140591 | 68140816 |
| chr7 | 68283731 | 68283976 |
| chr7 | 68314471 | 68314596 |
| chr7 | 68445361 | 68445496 |
| chr7 | 68445621 | 68445736 |
| chr7 | 69452491 | 69452676 |
| chr7 | 69455371 | 69455516 |
| chr7 | 69681721 | 69681856 |
| chr7 | 69718621 | 69718716 |
| chr7 | 69823811 | 69823956 |
| chr7 | 69929351 | 69929456 |
| chr7 | 69992081 | 69992366 |
| chr7 | 70046031 | 70046236 |
| chr7 | 70281661 | 70281806 |
| chr7 | 70302671 | 70302806 |
| chr7 | 70370431 | 70370636 |
| chr7 | 70379531 | 70379676 |
| chr7 | 70388721 | 70388846 |
| chr7 | 70388891 | 70388976 |
| chr7 | 70389291 | 70389386 |
| chr7 | 70491971 | 70492126 |
| chr7 | 70507151 | 70507436 |
| chr7 | 70643331 | 70643516 |
| chr7 | 70669601 | 70669776 |
| chr7 | 70687191 | 70687286 |
| chr7 | 70719401 | 70719506 |
| chr7 | 70721251 | 70721436 |
| chr7 | 70721761 | 70721976 |
| chr7 | 70803471 | 70803756 |
| chr7 | 70845211 | 70845366 |
| chr7 | 70897141 | 70897556 |
| chr7 | 70938621 | 70938756 |
| chr7 | 71012471 | 71012666 |
| chr7 | 71063711 | 71063806 |
| chr7 | 71224761 | 71224916 |
| chr7 | 71253891 | 71254366 |
| chr7 | 71256921 | 71257256 |
| chr7 | 71257311 | 71257406 |
| chr7 | 71375281 | 71375416 |
| chr7 | 71496641 | 71496936 |
| chr7 | 71703291 | 71703466 |
| chr7 | 72024441 | 72024636 |
| chr7 | 72091711 | 72091836 |
| chr7 | 72103511 | 72103736 |
| chr7 | 72611921 | 72612156 |
| chr7 | 73019311 | 73019446 |
| chr7 | 73019611 | 73019726 |
| chr7 | 73070521 | 73070676 |
| chr7 | 73182451 | 73182596 |
| chr7 | 73209981 | 73210166 |
| chr7 | 73222261 | 73222436 |
| chr7 | 73449761 | 73449916 |
| chr7 | 73452721 | 73452836 |

|      |          |          |
|------|----------|----------|
| chr7 | 73457961 | 73458116 |
| chr7 | 73463231 | 73463396 |
| chr7 | 73504261 | 73504446 |
| chr7 | 73604051 | 73604166 |
| chr7 | 73764151 | 73764276 |
| chr7 | 74164601 | 74164696 |
| chr7 | 74290631 | 74290756 |
| chr7 | 74561501 | 74561636 |
| chr7 | 75118671 | 75118836 |
| chr7 | 75169121 | 75169196 |
| chr7 | 75170531 | 75170626 |
| chr7 | 75287511 | 75287606 |
| chr7 | 75289231 | 75289316 |
| chr7 | 75330211 | 75330346 |
| chr7 | 75516101 | 75516256 |
| chr7 | 75626121 | 75626276 |
| chr7 | 75626371 | 75626486 |
| chr7 | 75660711 | 75660816 |
| chr7 | 75856801 | 75856916 |
| chr7 | 75856961 | 75857086 |
| chr7 | 76267101 | 76267276 |
| chr7 | 76282641 | 76282856 |
| chr7 | 76289801 | 76289936 |
| chr7 | 76359731 | 76359856 |
| chr7 | 76828771 | 76829066 |
| chr7 | 78231121 | 78231216 |
| chr7 | 78418341 | 78418506 |
| chr7 | 78875701 | 78875846 |
| chr7 | 79040631 | 79040816 |
| chr7 | 79174331 | 79174416 |
| chr7 | 79187161 | 79187496 |
| chr7 | 79189531 | 79189896 |
| chr7 | 79232221 | 79232416 |
| chr7 | 79233571 | 79233976 |
| chr7 | 79268041 | 79268326 |
| chr7 | 79315571 | 79315706 |
| chr7 | 79399531 | 79399666 |
| chr7 | 79482941 | 79483066 |
| chr7 | 79741911 | 79742186 |
| chr7 | 79987491 | 79987676 |
| chr7 | 80058221 | 80058386 |
| chr7 | 80062761 | 80062896 |
| chr7 | 80207541 | 80207756 |
| chr7 | 80316141 | 80316306 |
| chr7 | 80931101 | 80931316 |
| chr7 | 81370071 | 81370236 |
| chr7 | 81386771 | 81386896 |
| chr7 | 81388671 | 81388816 |
| chr7 | 81886131 | 81886386 |
| chr7 | 82110361 | 82110506 |
| chr7 | 82687541 | 82687666 |
| chr7 | 82970171 | 82970416 |
| chr7 | 83080361 | 83080476 |

|      |          |          |
|------|----------|----------|
| chr7 | 83319801 | 83319926 |
| chr7 | 83328151 | 83328276 |
| chr7 | 83328681 | 83328806 |
| chr7 | 83329381 | 83329546 |
| chr7 | 83359061 | 83359186 |
| chr7 | 83746201 | 83746306 |
| chr7 | 83752751 | 83752876 |
| chr7 | 84288901 | 84289026 |
| chr7 | 84528311 | 84528406 |
| chr7 | 86346901 | 86346996 |
| chr7 | 88354161 | 88354286 |
| chr7 | 89085761 | 89085916 |
| chr7 | 89189711 | 89189826 |
| chr7 | 89345821 | 89345986 |
| chr7 | 89395741 | 89396056 |
| chr7 | 89397531 | 89397646 |
| chr7 | 89533011 | 89533146 |
| chr7 | 89615021 | 89615146 |
| chr7 | 89727771 | 89727896 |
| chr7 | 89758891 | 89759046 |
| chr7 | 89904471 | 89904596 |
| chr7 | 90179391 | 90179516 |
| chr7 | 90211111 | 90211206 |
| chr7 | 90262751 | 90262936 |
| chr7 | 90444621 | 90444796 |
| chr7 | 92110661 | 92110826 |
| chr7 | 93917311 | 93917456 |
| chr7 | 95359811 | 95359906 |
| chr7 | 95564031 | 95564266 |
| chr7 | 95808701 | 95808806 |
| chr7 | 96142661 | 96142826 |
| chr7 | 96212721 | 96212896 |
| chr7 | 96430701 | 96430836 |
| chr7 | 96474051 | 96474186 |
| chr7 | 96485091 | 96485196 |
| chr7 | 96683101 | 96683246 |
| chr7 | 96683381 | 96683516 |
| chr7 | 96692021 | 96692106 |
| chr7 | 96707921 | 96708066 |
| chr7 | 96740701 | 96740976 |
| chr7 | 96777311 | 96777426 |
| chr7 | 96847731 | 96847926 |
| chr7 | 96861061 | 96861236 |
| chr7 | 97327421 | 97327596 |
| chr7 | 97974211 | 97974406 |
| chr7 | 98019681 | 98020046 |
| chr7 | 98035791 | 98035896 |
| chr7 | 98040751 | 98040846 |
| chr7 | 98054291 | 98054356 |
| chr7 | 98065041 | 98065166 |
| chr7 | 98399161 | 98399376 |
| chr7 | 98631301 | 98631406 |
| chr7 | 98669111 | 98669346 |



|      |           |           |
|------|-----------|-----------|
| chr7 | 98679661  | 98679796  |
| chr7 | 98680851  | 98680966  |
| chr7 | 98822671  | 98822776  |
| chr7 | 98919301  | 98919486  |
| chr7 | 98920661  | 98920796  |
| chr7 | 98940791  | 98940986  |
| chr7 | 99179241  | 99179496  |
| chr7 | 99179511  | 99179646  |
| chr7 | 99199041  | 99199156  |
| chr7 | 99203801  | 99203976  |
| chr7 | 99413451  | 99413616  |
| chr7 | 99522861  | 99522966  |
| chr7 | 99544271  | 99544516  |
| chr7 | 100000861 | 100000986 |
| chr7 | 100064521 | 100064636 |
| chr7 | 100196871 | 100197026 |
| chr7 | 100597491 | 100597836 |
| chr7 | 100659591 | 100659716 |
| chr7 | 100690381 | 100690526 |
| chr7 | 100800761 | 100800906 |
| chr7 | 100830891 | 100831026 |
| chr7 | 100916301 | 100916456 |
| chr7 | 101251941 | 101252076 |
| chr7 | 101389231 | 101389426 |
| chr7 | 101497061 | 101497226 |
| chr7 | 101742051 | 101742156 |
| chr7 | 101742421 | 101742596 |
| chr7 | 101743151 | 101743246 |
| chr7 | 101973621 | 101974206 |
| chr7 | 105493611 | 105493726 |
| chr7 | 107494031 | 107494126 |
| chr7 | 108906191 | 108906256 |
| chr7 | 108906261 | 108906486 |
| chr7 | 108982801 | 108983316 |
| chr7 | 109641271 | 109641396 |
| chr7 | 109644221 | 109644356 |
| chr7 | 109748961 | 109749066 |
| chr7 | 109882901 | 109883036 |
| chr7 | 109888431 | 109888606 |
| chr7 | 110088461 | 110088666 |
| chr7 | 110464481 | 110464676 |
| chr7 | 110612391 | 110612636 |
| chr7 | 110813251 | 110813416 |
| chr7 | 110814821 | 110814946 |
| chr7 | 110816261 | 110816356 |
| chr7 | 111074121 | 111074246 |
| chr7 | 111093131 | 111093256 |
| chr7 | 111385431 | 111385566 |
| chr7 | 111934281 | 111934426 |
| chr7 | 111961571 | 111961926 |
| chr7 | 112004631 | 112004796 |
| chr7 | 112236081 | 112236266 |
| chr7 | 112285261 | 112285366 |

|      |           |           |
|------|-----------|-----------|
| chr7 | 112291321 | 112291576 |
| chr7 | 112293471 | 112293626 |
| chr7 | 112447501 | 112447656 |
| chr7 | 112486601 | 112486736 |
| chr7 | 112511361 | 112511506 |
| chr7 | 112511561 | 112511716 |
| chr7 | 112511771 | 112512086 |
| chr7 | 112532961 | 112533166 |
| chr7 | 112534301 | 112534496 |
| chr7 | 112553721 | 112553856 |
| chr7 | 112562031 | 112562186 |
| chr7 | 112563931 | 112564076 |
| chr7 | 112564131 | 112564286 |
| chr7 | 112579481 | 112579686 |
| chr7 | 112617471 | 112617836 |
| chr7 | 112642791 | 112642996 |
| chr7 | 112722011 | 112722156 |
| chr7 | 112740571 | 112740686 |
| chr7 | 112885201 | 112885366 |
| chr7 | 112931561 | 112931696 |
| chr7 | 113110371 | 113110516 |
| chr7 | 113524311 | 113524436 |
| chr7 | 113535371 | 113535566 |
| chr7 | 113611001 | 113611126 |
| chr7 | 113807501 | 113807646 |
| chr7 | 113884791 | 113884936 |
| chr7 | 114083911 | 114084026 |
| chr7 | 114354361 | 114354676 |
| chr7 | 115015091 | 115015216 |
| chr7 | 115103791 | 115103876 |
| chr7 | 115165341 | 115165496 |
| chr7 | 115188431 | 115188836 |
| chr7 | 115195341 | 115195476 |
| chr7 | 115201741 | 115201966 |
| chr7 | 115206841 | 115206916 |
| chr7 | 115241741 | 115241896 |
| chr7 | 115268051 | 115268376 |
| chr7 | 115359521 | 115359666 |
| chr7 | 115407191 | 115407286 |
| chr7 | 115457981 | 115458106 |
| chr7 | 115458341 | 115458466 |
| chr7 | 115464131 | 115464266 |
| chr7 | 115541581 | 115541696 |
| chr7 | 115615491 | 115615696 |
| chr7 | 115658731 | 115658946 |
| chr7 | 115732951 | 115733046 |
| chr7 | 116027951 | 116028046 |
| chr7 | 116035781 | 116036016 |
| chr7 | 116071921 | 116072066 |
| chr7 | 116073911 | 116074156 |
| chr7 | 116077941 | 116078096 |
| chr7 | 116096221 | 116096326 |
| chr7 | 117020791 | 117020986 |

|      |           |           |
|------|-----------|-----------|
| chr7 | 117324541 | 117324676 |
| chr7 | 117411711 | 117412046 |
| chr7 | 118254601 | 118254806 |
| chr7 | 118258001 | 118258116 |
| chr7 | 118596331 | 118596456 |
| chr7 | 118680351 | 118680446 |
| chr7 | 118734441 | 118734696 |
| chr7 | 118764141 | 118764266 |
| chr7 | 118764331 | 118764536 |
| chr7 | 119122141 | 119122266 |
| chr7 | 119289391 | 119289536 |
| chr7 | 119529381 | 119529476 |
| chr7 | 119551921 | 119552066 |
| chr7 | 120656431 | 120656536 |
| chr7 | 120735251 | 120735376 |
| chr7 | 121022961 | 121023056 |
| chr7 | 121043641 | 121043736 |
| chr7 | 121044011 | 121044206 |
| chr7 | 121414201 | 121414446 |
| chr7 | 121611661 | 121611806 |
| chr7 | 121730291 | 121730426 |
| chr7 | 121804221 | 121804386 |
| chr7 | 121804811 | 121804886 |
| chr7 | 121805511 | 121805656 |
| chr7 | 121805691 | 121805826 |
| chr7 | 121806371 | 121806576 |
| chr7 | 121806821 | 121807186 |
| chr7 | 121807331 | 121807496 |
| chr7 | 122079771 | 122079896 |
| chr7 | 122172461 | 122172616 |
| chr7 | 122172681 | 122172906 |
| chr7 | 122197711 | 122197986 |
| chr7 | 122273441 | 122273666 |
| chr7 | 122273801 | 122274006 |
| chr7 | 122279221 | 122279446 |
| chr7 | 122280401 | 122280576 |
| chr7 | 122288791 | 122288876 |
| chr7 | 122357271 | 122357406 |
| chr7 | 123105151 | 123105226 |
| chr7 | 123105491 | 123105636 |
| chr7 | 123177171 | 123177266 |
| chr7 | 123236771 | 123236906 |
| chr7 | 123278261 | 123278376 |
| chr7 | 123316971 | 123317066 |
| chr7 | 123317081 | 123317366 |
| chr7 | 123521861 | 123521966 |
| chr7 | 125003101 | 125003176 |
| chr7 | 125131791 | 125131956 |
| chr7 | 125356641 | 125356806 |
| chr7 | 125356951 | 125357096 |
| chr7 | 125357111 | 125357376 |
| chr7 | 125656541 | 125656756 |
| chr7 | 125877761 | 125877966 |

|      |           |           |
|------|-----------|-----------|
| chr7 | 126022081 | 126022236 |
| chr7 | 126414191 | 126414416 |
| chr7 | 126454881 | 126455016 |
| chr7 | 127473531 | 127473686 |
| chr7 | 127478401 | 127478496 |
| chr7 | 128068601 | 128068706 |
| chr7 | 128080281 | 128080346 |
| chr7 | 128095541 | 128095686 |
| chr7 | 128148971 | 128149066 |
| chr7 | 128180291 | 128180446 |
| chr7 | 128194441 | 128194626 |
| chr7 | 128320861 | 128320956 |
| chr7 | 128322351 | 128322566 |
| chr7 | 128369801 | 128369956 |
| chr7 | 128378861 | 128378936 |
| chr7 | 128382681 | 128382866 |
| chr7 | 128456281 | 128456416 |
| chr7 | 128463691 | 128463826 |
| chr7 | 129172031 | 129172106 |
| chr7 | 129443071 | 129443236 |
| chr7 | 129444631 | 129444736 |
| chr7 | 129469611 | 129469866 |
| chr7 | 129535511 | 129535846 |
| chr7 | 129753941 | 129754066 |
| chr7 | 129755601 | 129755696 |
| chr7 | 129775761 | 129775916 |
| chr7 | 129779111 | 129779226 |
| chr7 | 129810221 | 129810366 |
| chr7 | 129838851 | 129839026 |
| chr7 | 129865241 | 129865396 |
| chr7 | 129865441 | 129865506 |
| chr7 | 129889681 | 129889866 |
| chr7 | 129889971 | 129890136 |
| chr7 | 129894371 | 129894596 |
| chr7 | 129913731 | 129913826 |
| chr7 | 129920491 | 129920856 |
| chr7 | 129920941 | 129921006 |
| chr7 | 129961291 | 129961486 |
| chr7 | 129973571 | 129973966 |
| chr7 | 130006981 | 130007146 |
| chr7 | 130022751 | 130022876 |
| chr7 | 130059731 | 130059936 |
| chr7 | 130060371 | 130060516 |
| chr7 | 130081871 | 130081976 |
| chr7 | 130101171 | 130101356 |
| chr7 | 130159951 | 130160196 |
| chr7 | 130263801 | 130263996 |
| chr7 | 130440491 | 130440626 |
| chr7 | 130460541 | 130460706 |
| chr7 | 130485071 | 130485246 |
| chr7 | 130541321 | 130541576 |
| chr7 | 130541911 | 130542146 |
| chr7 | 130542911 | 130543176 |

|      |           |           |
|------|-----------|-----------|
| chr7 | 130620631 | 130620796 |
| chr7 | 130629041 | 130629276 |
| chr7 | 130637481 | 130637576 |
| chr7 | 130652101 | 130652246 |
| chr7 | 130653021 | 130653176 |
| chr7 | 130677221 | 130677336 |
| chr7 | 130749791 | 130749926 |
| chr7 | 130767451 | 130767706 |
| chr7 | 131268401 | 131268596 |
| chr7 | 131373461 | 131373596 |
| chr7 | 131482491 | 131482666 |
| chr7 | 131482721 | 131482866 |
| chr7 | 131517971 | 131518126 |
| chr7 | 131614611 | 131614826 |
| chr7 | 131616211 | 131616436 |
| chr7 | 131616531 | 131616666 |
| chr7 | 131617061 | 131617256 |
| chr7 | 131684441 | 131684566 |
| chr7 | 131684571 | 131684706 |
| chr7 | 131685051 | 131685176 |
| chr7 | 132097161 | 132097256 |
| chr7 | 132211191 | 132211306 |
| chr7 | 132223201 | 132223296 |
| chr7 | 132224301 | 132224466 |
| chr7 | 132224831 | 132224966 |
| chr7 | 132251501 | 132251606 |
| chr7 | 132397171 | 132397346 |
| chr7 | 132475811 | 132476036 |
| chr7 | 132550441 | 132550766 |
| chr7 | 132706941 | 132707076 |
| chr7 | 133144111 | 133144226 |
| chr7 | 133319861 | 133319966 |
| chr7 | 133769951 | 133770076 |
| chr7 | 134526861 | 134527136 |
| chr7 | 134538471 | 134538576 |
| chr7 | 134543261 | 134543386 |
| chr7 | 134591621 | 134591846 |
| chr7 | 134591931 | 134592026 |
| chr7 | 134722021 | 134722116 |
| chr7 | 135229501 | 135229636 |
| chr7 | 135303871 | 135304026 |
| chr7 | 135307091 | 135307206 |
| chr7 | 135319581 | 135319736 |
| chr7 | 135386961 | 135387106 |
| chr7 | 135387171 | 135387336 |
| chr7 | 135441371 | 135441556 |
| chr7 | 135699231 | 135699386 |
| chr7 | 135714071 | 135714216 |
| chr7 | 135727421 | 135727586 |
| chr7 | 135739551 | 135739716 |
| chr7 | 135959361 | 135959546 |
| chr7 | 135993931 | 135994066 |
| chr7 | 136051801 | 136051906 |

|      |           |           |
|------|-----------|-----------|
| chr7 | 136143821 | 136143966 |
| chr7 | 136268461 | 136268676 |
| chr7 | 136318931 | 136319096 |
| chr7 | 136340621 | 136340756 |
| chr7 | 136420411 | 136420516 |
| chr7 | 136420521 | 136420686 |
| chr7 | 136478741 | 136478866 |
| chr7 | 136512601 | 136512746 |
| chr7 | 136665301 | 136665546 |
| chr7 | 136683911 | 136684016 |
| chr7 | 136749981 | 136750076 |
| chr7 | 136763361 | 136763536 |
| chr7 | 136764541 | 136764896 |
| chr7 | 136770121 | 136770216 |
| chr7 | 136879511 | 136879656 |
| chr7 | 136958341 | 136958456 |
| chr7 | 137030321 | 137030486 |
| chr7 | 137040691 | 137040826 |
| chr7 | 137046101 | 137046226 |
| chr7 | 137046241 | 137046386 |
| chr7 | 137065781 | 137065966 |
| chr7 | 137091691 | 137091916 |
| chr7 | 137134821 | 137135166 |
| chr7 | 137135551 | 137135736 |
| chr7 | 137136171 | 137136546 |
| chr7 | 137145601 | 137145736 |
| chr7 | 137414911 | 137415016 |
| chr7 | 137523871 | 137523976 |
| chr7 | 137536941 | 137537106 |
| chr7 | 137679951 | 137680046 |
| chr7 | 137704071 | 137704206 |
| chr7 | 137844241 | 137844336 |
| chr7 | 137899611 | 137899806 |
| chr7 | 138038061 | 138038226 |
| chr7 | 138038311 | 138038406 |
| chr7 | 138213941 | 138214066 |
| chr7 | 138218531 | 138218676 |
| chr7 | 138220381 | 138220536 |
| chr7 | 138287101 | 138287196 |
| chr7 | 138287291 | 138287386 |
| chr7 | 138334351 | 138334556 |
| chr7 | 138376461 | 138376546 |
| chr7 | 138585171 | 138585306 |
| chr7 | 138926741 | 138927136 |
| chr7 | 138991571 | 138991686 |
| chr7 | 139214391 | 139214546 |
| chr7 | 139216221 | 139216446 |
| chr7 | 139370541 | 139370706 |
| chr7 | 139380131 | 139380346 |
| chr7 | 139852521 | 139852616 |
| chr7 | 139973001 | 139973136 |
| chr7 | 140760421 | 140760546 |
| chr7 | 140764671 | 140764786 |

|      |           |           |
|------|-----------|-----------|
| chr7 | 140785911 | 140786036 |
| chr7 | 140811411 | 140811576 |
| chr7 | 142126821 | 142126946 |
| chr7 | 142136581 | 142136696 |
| chr7 | 142281571 | 142281746 |
| chr7 | 142318921 | 142319176 |
| chr7 | 142319481 | 142319676 |
| chr7 | 142329421 | 142329556 |
| chr7 | 142333081 | 142333266 |
| chr7 | 142348141 | 142348376 |
| chr7 | 142349521 | 142349636 |
| chr7 | 142370631 | 142370876 |
| chr7 | 142374771 | 142374896 |
| chr7 | 142381951 | 142382086 |
| chr7 | 142474331 | 142474456 |
| chr7 | 143115031 | 143115146 |
| chr7 | 143182411 | 143182536 |
| chr7 | 143190041 | 143190286 |
| chr7 | 143198641 | 143198796 |
| chr7 | 143727631 | 143727726 |
| chr7 | 143804621 | 143804726 |
| chr7 | 143832191 | 143832296 |
| chr7 | 143833171 | 143833336 |
| chr7 | 143841851 | 143841946 |
| chr7 | 144221971 | 144222066 |
| chr7 | 144825001 | 144825196 |
| chr7 | 145021051 | 145021296 |
| chr6 | 4091001   | 4091086   |
| chr6 | 4347741   | 4347866   |
| chr6 | 4368581   | 4368696   |
| chr6 | 4412291   | 4412476   |
| chr6 | 4435351   | 4435466   |
| chr6 | 4438031   | 4438196   |
| chr6 | 4450391   | 4450516   |
| chr6 | 4500251   | 4500386   |
| chr6 | 4511161   | 4511396   |
| chr6 | 4534521   | 4534656   |
| chr6 | 4617601   | 4617756   |
| chr6 | 4617771   | 4617866   |
| chr6 | 4643561   | 4643886   |
| chr6 | 4673591   | 4673776   |
| chr6 | 4674201   | 4674286   |
| chr6 | 4674501   | 4674566   |
| chr6 | 4675671   | 4675746   |
| chr6 | 4684711   | 4684816   |
| chr6 | 4698771   | 4698896   |
| chr6 | 4842271   | 4842396   |
| chr6 | 4842441   | 4842756   |
| chr6 | 4843391   | 4843546   |
| chr6 | 4860351   | 4860536   |
| chr6 | 4926581   | 4926706   |
| chr6 | 4931351   | 4931446   |
| chr6 | 4950851   | 4951136   |

|      |          |          |
|------|----------|----------|
| chr6 | 4955451  | 4955686  |
| chr6 | 4957691  | 4957836  |
| chr6 | 4958771  | 4959006  |
| chr6 | 4960651  | 4960806  |
| chr6 | 4960831  | 4960946  |
| chr6 | 4968401  | 4968526  |
| chr6 | 4979131  | 4979266  |
| chr6 | 4979681  | 4979846  |
| chr6 | 5047561  | 5047706  |
| chr6 | 5050471  | 5050626  |
| chr6 | 5058631  | 5058786  |
| chr6 | 5063081  | 5063226  |
| chr6 | 5128311  | 5128396  |
| chr6 | 5228191  | 5228316  |
| chr6 | 5232461  | 5232696  |
| chr6 | 5330601  | 5330906  |
| chr6 | 5333701  | 5333846  |
| chr6 | 5345071  | 5345286  |
| chr6 | 5549961  | 5550086  |
| chr6 | 5708101  | 5708216  |
| chr6 | 5919371  | 5919476  |
| chr6 | 5954871  | 5954976  |
| chr6 | 5955911  | 5956056  |
| chr6 | 5965741  | 5965986  |
| chr6 | 6042581  | 6042806  |
| chr6 | 6158211  | 6158416  |
| chr6 | 6339021  | 6339256  |
| chr6 | 6502041  | 6502236  |
| chr6 | 7419581  | 7419676  |
| chr6 | 7469481  | 7469626  |
| chr6 | 7952451  | 7952646  |
| chr6 | 8128681  | 8128806  |
| chr6 | 8174561  | 8174756  |
| chr6 | 8705871  | 8706016  |
| chr6 | 8706091  | 8706236  |
| chr6 | 8814391  | 8814546  |
| chr6 | 8827801  | 8827986  |
| chr6 | 8944811  | 8945076  |
| chr6 | 8945191  | 8945546  |
| chr6 | 11966281 | 11966436 |
| chr6 | 12209761 | 12209916 |
| chr6 | 12356661 | 12356736 |
| chr6 | 12417911 | 12418096 |
| chr6 | 12505611 | 12505736 |
| chr6 | 12578971 | 12579096 |
| chr6 | 13202081 | 13202226 |
| chr6 | 13556321 | 13556446 |
| chr6 | 13625001 | 13625186 |
| chr6 | 15136771 | 15136976 |
| chr6 | 15137341 | 15137446 |
| chr6 | 15147381 | 15147476 |
| chr6 | 15207521 | 15207656 |
| chr6 | 15320321 | 15320576 |



|      |          |          |
|------|----------|----------|
| chr6 | 15328531 | 15328686 |
| chr6 | 15355021 | 15355256 |
| chr6 | 15355441 | 15355666 |
| chr6 | 15360061 | 15360236 |
| chr6 | 15360281 | 15360416 |
| chr6 | 15363851 | 15364006 |
| chr6 | 15390301 | 15390476 |
| chr6 | 15672331 | 15672586 |
| chr6 | 15739721 | 15739846 |
| chr6 | 15792001 | 15792096 |
| chr6 | 16127411 | 16127556 |
| chr6 | 16128121 | 16128256 |
| chr6 | 16283871 | 16284066 |
| chr6 | 16498951 | 16499076 |
| chr6 | 16499821 | 16499956 |
| chr6 | 16557451 | 16557636 |
| chr6 | 16557761 | 16557876 |
| chr6 | 16677321 | 16677596 |
| chr6 | 16677631 | 16677806 |
| chr6 | 17006231 | 17006366 |
| chr6 | 17012561 | 17012796 |
| chr6 | 17019291 | 17019476 |
| chr6 | 17027641 | 17027796 |
| chr6 | 17029541 | 17029676 |
| chr6 | 17029851 | 17029966 |
| chr6 | 17425061 | 17425256 |
| chr6 | 17434641 | 17434796 |
| chr6 | 17448851 | 17448956 |
| chr6 | 17495551 | 17495766 |
| chr6 | 17496481 | 17496616 |
| chr6 | 17534071 | 17534186 |
| chr6 | 17953431 | 17953526 |
| chr6 | 18395921 | 18396126 |
| chr6 | 18590131 | 18590246 |
| chr6 | 18606801 | 18606936 |
| chr6 | 18638911 | 18639036 |
| chr6 | 18650021 | 18650136 |
| chr6 | 21737851 | 21737966 |
| chr6 | 21755031 | 21755146 |
| chr6 | 21772991 | 21773146 |
| chr6 | 21773241 | 21773376 |
| chr6 | 21780101 | 21780266 |
| chr6 | 21789521 | 21789726 |
| chr6 | 21789871 | 21790076 |
| chr6 | 21790281 | 21790426 |
| chr6 | 21909651 | 21909796 |
| chr6 | 21949271 | 21949386 |
| chr6 | 21950221 | 21950346 |
| chr6 | 21975931 | 21976096 |
| chr6 | 22029041 | 22029166 |
| chr6 | 22054401 | 22054586 |
| chr6 | 22296361 | 22296526 |
| chr6 | 22311261 | 22311496 |

|      |          |          |
|------|----------|----------|
| chr6 | 22353431 | 22353646 |
| chr6 | 22362181 | 22362296 |
| chr6 | 22540491 | 22540606 |
| chr6 | 22824611 | 22824786 |
| chr6 | 22985061 | 22985136 |
| chr6 | 23138351 | 23138506 |
| chr6 | 23152931 | 23153026 |
| chr6 | 23231061 | 23231126 |
| chr6 | 23242881 | 23243016 |
| chr6 | 23308101 | 23308246 |
| chr6 | 23332311 | 23332546 |
| chr6 | 23580411 | 23580566 |
| chr6 | 23682401 | 23682586 |
| chr6 | 23684381 | 23684486 |
| chr6 | 24607741 | 24607866 |
| chr6 | 27799171 | 27799356 |
| chr6 | 27900821 | 27900986 |
| chr6 | 28053041 | 28053236 |
| chr6 | 28138911 | 28139056 |
| chr6 | 28414821 | 28415046 |
| chr6 | 28580071 | 28580186 |
| chr6 | 28668021 | 28668176 |
| chr6 | 28769851 | 28770026 |
| chr6 | 28778721 | 28778856 |
| chr6 | 28804591 | 28804836 |
| chr6 | 28847081 | 28847226 |
| chr6 | 28909311 | 28909506 |
| chr6 | 29096051 | 29096236 |
| chr6 | 29463351 | 29463496 |
| chr6 | 29610721 | 29610896 |
| chr6 | 29798831 | 29798976 |
| chr6 | 30257751 | 30258006 |
| chr6 | 30302911 | 30303086 |
| chr6 | 30413541 | 30413626 |
| chr6 | 30476781 | 30477016 |
| chr6 | 30493971 | 30494166 |
| chr6 | 30496941 | 30497106 |
| chr6 | 30499231 | 30499366 |
| chr6 | 30499701 | 30499836 |
| chr6 | 30522821 | 30522956 |
| chr6 | 30522971 | 30523066 |
| chr6 | 30532471 | 30532596 |
| chr6 | 30548241 | 30548486 |
| chr6 | 30564321 | 30564436 |
| chr6 | 30567931 | 30568136 |
| chr6 | 30568341 | 30568456 |
| chr6 | 30568571 | 30568736 |
| chr6 | 30568751 | 30568916 |
| chr6 | 30602711 | 30602856 |
| chr6 | 30603041 | 30603216 |
| chr6 | 30608701 | 30608946 |
| chr6 | 30614991 | 30615146 |
| chr6 | 30616171 | 30616326 |

|      |          |          |
|------|----------|----------|
| chr6 | 30624221 | 30624576 |
| chr6 | 30629621 | 30629816 |
| chr6 | 30659231 | 30659396 |
| chr6 | 30660701 | 30660856 |
| chr6 | 30976591 | 30976866 |
| chr6 | 30977281 | 30977476 |
| chr6 | 31018831 | 31018966 |
| chr6 | 31030621 | 31030756 |
| chr6 | 31051251 | 31051396 |
| chr6 | 31216451 | 31216696 |
| chr6 | 31248031 | 31248176 |
| chr6 | 31488731 | 31488876 |
| chr6 | 31526741 | 31527026 |
| chr6 | 31527301 | 31527416 |
| chr6 | 31530381 | 31530486 |
| chr6 | 31560071 | 31560236 |
| chr6 | 31567001 | 31567096 |
| chr6 | 31567221 | 31567586 |
| chr6 | 31567601 | 31567766 |
| chr6 | 31568431 | 31568576 |
| chr6 | 31647911 | 31648016 |
| chr6 | 31741011 | 31741106 |
| chr6 | 31760941 | 31761036 |
| chr6 | 31791301 | 31791446 |
| chr6 | 31792291 | 31792406 |
| chr6 | 31817111 | 31817256 |
| chr6 | 32488911 | 32489186 |
| chr6 | 32489251 | 32489386 |
| chr6 | 32920251 | 32920456 |
| chr6 | 32921671 | 32921796 |
| chr6 | 33008531 | 33008636 |
| chr6 | 33025021 | 33025146 |
| chr6 | 33025151 | 33025266 |
| chr6 | 33102561 | 33102716 |
| chr6 | 33157741 | 33157856 |
| chr6 | 33265191 | 33265356 |
| chr6 | 33368501 | 33368616 |
| chr6 | 33612141 | 33612296 |
| chr6 | 33803521 | 33803736 |
| chr6 | 33919991 | 33920126 |
| chr6 | 33922391 | 33922516 |
| chr6 | 33922671 | 33922846 |
| chr6 | 33922911 | 33923056 |
| chr6 | 33924001 | 33924196 |
| chr6 | 34040811 | 34041076 |
| chr6 | 34061501 | 34061606 |
| chr6 | 34133701 | 34133816 |
| chr6 | 34146921 | 34147056 |
| chr6 | 34150171 | 34150426 |
| chr6 | 34428141 | 34428256 |
| chr6 | 34434621 | 34434856 |
| chr6 | 34435041 | 34435146 |
| chr6 | 34473891 | 34474206 |

|      |          |          |
|------|----------|----------|
| chr6 | 34484511 | 34484716 |
| chr6 | 34570551 | 34570686 |
| chr6 | 34615761 | 34615916 |
| chr6 | 34796221 | 34796366 |
| chr6 | 34797191 | 34797336 |
| chr6 | 34798781 | 34798916 |
| chr6 | 34798971 | 34799276 |
| chr6 | 35284751 | 35284896 |
| chr6 | 35300971 | 35301166 |
| chr6 | 35437231 | 35437326 |
| chr6 | 35555251 | 35555366 |
| chr6 | 35638881 | 35639056 |
| chr6 | 35639091 | 35639216 |
| chr6 | 36438291 | 36438436 |
| chr6 | 36705871 | 36706146 |
| chr6 | 36714801 | 36714966 |
| chr6 | 36718791 | 36719216 |
| chr6 | 36738651 | 36738846 |
| chr6 | 36743361 | 36743496 |
| chr6 | 36810781 | 36810886 |
| chr6 | 36820531 | 36820696 |
| chr6 | 36959131 | 36959216 |
| chr6 | 37140961 | 37141266 |
| chr6 | 37155101 | 37155216 |
| chr6 | 37284471 | 37284626 |
| chr6 | 37318371 | 37318556 |
| chr6 | 37329841 | 37330046 |
| chr6 | 37333621 | 37333776 |
| chr6 | 37335501 | 37335586 |
| chr6 | 37335641 | 37335816 |
| chr6 | 37335841 | 37335976 |
| chr6 | 37344831 | 37345006 |
| chr6 | 37360641 | 37360866 |
| chr6 | 37413001 | 37413146 |
| chr6 | 37508061 | 37508176 |
| chr6 | 37523461 | 37523656 |
| chr6 | 37546701 | 37546796 |
| chr6 | 37573721 | 37573796 |
| chr6 | 37575231 | 37575416 |
| chr6 | 37588021 | 37588146 |
| chr6 | 37610921 | 37611036 |
| chr6 | 37653011 | 37653126 |
| chr6 | 38110871 | 38111036 |
| chr6 | 38182591 | 38182696 |
| chr6 | 38690001 | 38690206 |
| chr6 | 38691021 | 38691256 |
| chr6 | 38800881 | 38800986 |
| chr6 | 38826771 | 38827256 |
| chr6 | 38891081 | 38891266 |
| chr6 | 39225531 | 39225666 |
| chr6 | 39241121 | 39241256 |
| chr6 | 39274901 | 39275466 |
| chr6 | 39276681 | 39277086 |

|      |          |          |
|------|----------|----------|
| chr6 | 39302571 | 39302676 |
| chr6 | 39302931 | 39303076 |
| chr6 | 39445391 | 39445576 |
| chr6 | 39472511 | 39472676 |
| chr6 | 39805021 | 39805356 |
| chr6 | 39921741 | 39921876 |
| chr6 | 40318361 | 40318476 |
| chr6 | 43177041 | 43177166 |
| chr6 | 45474171 | 45474326 |
| chr6 | 45474341 | 45474506 |
| chr6 | 46306081 | 46306156 |
| chr6 | 46895611 | 46895726 |
| chr6 | 47131631 | 47131776 |
| chr6 | 47178721 | 47178856 |
| chr6 | 47248561 | 47248706 |
| chr6 | 47258881 | 47259016 |
| chr6 | 47266771 | 47266916 |
| chr6 | 47320131 | 47320266 |
| chr6 | 47320321 | 47320436 |
| chr6 | 48295931 | 48296066 |
| chr6 | 48471211 | 48471376 |
| chr6 | 48507531 | 48507686 |
| chr6 | 48508591 | 48508706 |
| chr6 | 49122381 | 49122546 |
| chr6 | 49152321 | 49152476 |
| chr6 | 49155071 | 49155266 |
| chr6 | 49155941 | 49156066 |
| chr6 | 49287401 | 49287536 |
| chr6 | 49536301 | 49536436 |
| chr6 | 49709251 | 49709446 |
| chr6 | 49712081 | 49712216 |
| chr6 | 49733901 | 49734056 |
| chr6 | 50038721 | 50038866 |
| chr6 | 50320171 | 50320316 |
| chr6 | 50374881 | 50375046 |
| chr6 | 50578211 | 50578326 |
| chr6 | 50650041 | 50650206 |
| chr6 | 50696071 | 50696256 |
| chr6 | 50696311 | 50696526 |
| chr6 | 50706341 | 50706516 |
| chr6 | 50706701 | 50706866 |
| chr6 | 50706911 | 50707006 |
| chr6 | 50729171 | 50729326 |
| chr6 | 50739321 | 50739466 |
| chr6 | 50752731 | 50752916 |
| chr6 | 50753071 | 50753216 |
| chr6 | 50753411 | 50753616 |
| chr6 | 50820251 | 50820816 |
| chr6 | 50859261 | 50859406 |
| chr6 | 50868621 | 50868716 |
| chr6 | 50889571 | 50889696 |
| chr6 | 50994501 | 50994606 |
| chr6 | 50994811 | 50994996 |

|      |          |          |
|------|----------|----------|
| chr6 | 50999861 | 51000016 |
| chr6 | 51006951 | 51007086 |
| chr6 | 51145421 | 51145596 |
| chr6 | 51149261 | 51149366 |
| chr6 | 51307581 | 51307776 |
| chr6 | 51321491 | 51321656 |
| chr6 | 51510511 | 51510666 |
| chr6 | 51525001 | 51525066 |
| chr6 | 51543391 | 51543506 |
| chr6 | 51549431 | 51549576 |
| chr6 | 51565851 | 51566036 |
| chr6 | 51604991 | 51605156 |
| chr6 | 51614311 | 51614466 |
| chr6 | 51632761 | 51632946 |
| chr6 | 51639031 | 51639236 |
| chr6 | 51645211 | 51645376 |
| chr6 | 51647361 | 51647466 |
| chr6 | 51701101 | 51701346 |
| chr6 | 51720231 | 51720416 |
| chr6 | 51736871 | 51736996 |
| chr6 | 51762661 | 51762766 |
| chr6 | 51773701 | 51773916 |
| chr6 | 51778481 | 51778826 |
| chr6 | 51779321 | 51779496 |
| chr6 | 51804661 | 51804876 |
| chr6 | 51811941 | 51812176 |
| chr6 | 51812231 | 51812356 |
| chr6 | 51862861 | 51863006 |
| chr6 | 51932331 | 51932486 |
| chr6 | 51967221 | 51967416 |
| chr6 | 51972101 | 51972246 |
| chr6 | 51977291 | 51977386 |
| chr6 | 52009331 | 52009486 |
| chr6 | 52020821 | 52020966 |
| chr6 | 52030811 | 52031076 |
| chr6 | 52031491 | 52031596 |
| chr6 | 52031791 | 52032176 |
| chr6 | 52032391 | 52032596 |
| chr6 | 52036431 | 52036586 |
| chr6 | 52042761 | 52043166 |
| chr6 | 52048321 | 52048476 |
| chr6 | 52048951 | 52049116 |
| chr6 | 52076111 | 52076256 |
| chr6 | 52114951 | 52115066 |
| chr6 | 52117041 | 52117196 |
| chr6 | 52126531 | 52126596 |
| chr6 | 52252561 | 52252916 |
| chr6 | 52298351 | 52298656 |
| chr6 | 52346601 | 52346846 |
| chr6 | 52347091 | 52347256 |
| chr6 | 52348121 | 52348336 |
| chr6 | 52443421 | 52443596 |
| chr6 | 52497031 | 52497106 |

|      |          |          |
|------|----------|----------|
| chr6 | 52514051 | 52514306 |
| chr6 | 52523401 | 52523556 |
| chr6 | 52571761 | 52571946 |
| chr6 | 52759521 | 52759666 |
| chr6 | 52759791 | 52759986 |
| chr6 | 52760251 | 52760376 |
| chr6 | 52769101 | 52769306 |
| chr6 | 52770141 | 52770386 |
| chr6 | 52770611 | 52770776 |
| chr6 | 52770811 | 52770926 |
| chr6 | 52951051 | 52951166 |
| chr6 | 52961181 | 52961326 |
| chr6 | 53137511 | 53137636 |
| chr6 | 53185701 | 53185846 |
| chr6 | 53202691 | 53202866 |
| chr6 | 53253831 | 53254006 |
| chr6 | 53266911 | 53267356 |
| chr6 | 53328381 | 53328546 |
| chr6 | 53378891 | 53379076 |
| chr6 | 53503821 | 53503986 |
| chr6 | 53513041 | 53513206 |
| chr6 | 53513341 | 53513436 |
| chr6 | 53556531 | 53556686 |
| chr6 | 53584091 | 53584266 |
| chr6 | 53592861 | 53592956 |
| chr6 | 53635151 | 53635316 |
| chr6 | 53642651 | 53642776 |
| chr6 | 53736191 | 53736276 |
| chr6 | 53770461 | 53770596 |
| chr6 | 53880191 | 53880306 |
| chr6 | 53991071 | 53991226 |
| chr6 | 54123601 | 54123736 |
| chr6 | 54420751 | 54420856 |
| chr6 | 54420911 | 54421046 |
| chr6 | 54488181 | 54488336 |
| chr6 | 54491751 | 54491886 |
| chr6 | 54707331 | 54707526 |
| chr6 | 54711331 | 54711466 |
| chr6 | 54711701 | 54711946 |
| chr6 | 54891651 | 54891786 |
| chr6 | 55281441 | 55281646 |
| chr6 | 55321541 | 55321696 |
| chr6 | 55442871 | 55443166 |
| chr6 | 55734971 | 55735066 |
| chr6 | 60972391 | 60972676 |
| chr6 | 61225901 | 61225986 |
| chr6 | 65240731 | 65240806 |
| chr6 | 65607911 | 65607996 |
| chr6 | 66007081 | 66007176 |
| chr6 | 66049541 | 66049706 |
| chr6 | 66856051 | 66856186 |
| chr6 | 66859461 | 66859626 |
| chr6 | 66957371 | 66957636 |

|      |          |          |
|------|----------|----------|
| chr6 | 66960781 | 66960916 |
| chr6 | 66965061 | 66965386 |
| chr6 | 67032511 | 67032696 |
| chr6 | 67158401 | 67158726 |
| chr6 | 67835881 | 67836046 |
| chr6 | 68095241 | 68095376 |
| chr6 | 70524171 | 70524286 |
| chr6 | 70801671 | 70801846 |
| chr6 | 70807721 | 70807876 |
| chr6 | 70980331 | 70980506 |
| chr6 | 70980541 | 70980746 |
| chr6 | 71155011 | 71155156 |
| chr6 | 71199871 | 71200076 |
| chr6 | 71665041 | 71665176 |
| chr6 | 72146101 | 72146226 |
| chr6 | 72146271 | 72146416 |
| chr6 | 72153501 | 72153616 |
| chr6 | 72169731 | 72169906 |
| chr6 | 72174401 | 72174576 |
| chr6 | 72262711 | 72262856 |
| chr6 | 72442051 | 72442196 |
| chr6 | 72549511 | 72549606 |
| chr6 | 72562801 | 72562906 |
| chr6 | 72571261 | 72571366 |
| chr6 | 72584821 | 72585016 |
| chr6 | 72608301 | 72608516 |
| chr6 | 72629351 | 72629486 |
| chr6 | 72634081 | 72634156 |
| chr6 | 72641291 | 72641526 |
| chr6 | 72643991 | 72644156 |
| chr6 | 72654651 | 72654766 |
| chr6 | 72659951 | 72660366 |
| chr6 | 72660401 | 72660566 |
| chr6 | 72693251 | 72693416 |
| chr6 | 72705451 | 72705796 |
| chr6 | 72732971 | 72733126 |
| chr6 | 72891201 | 72891386 |
| chr6 | 72891971 | 72892096 |
| chr6 | 75637171 | 75637296 |
| chr6 | 76980281 | 76980386 |
| chr6 | 77005041 | 77005196 |
| chr6 | 77145011 | 77145126 |
| chr6 | 77466961 | 77467066 |
| chr6 | 77467161 | 77467296 |
| chr6 | 77740921 | 77741046 |
| chr6 | 81555641 | 81555766 |
| chr6 | 82366231 | 82366486 |
| chr6 | 82690371 | 82690556 |
| chr6 | 82763771 | 82763906 |
| chr6 | 82800931 | 82801116 |
| chr6 | 82822191 | 82822286 |
| chr6 | 82857261 | 82857436 |
| chr6 | 82953131 | 82953306 |



|      |          |          |
|------|----------|----------|
| chr6 | 83010011 | 83010166 |
| chr6 | 83010481 | 83010706 |
| chr6 | 83205161 | 83205346 |
| chr6 | 83514151 | 83514316 |
| chr6 | 83754431 | 83754536 |
| chr6 | 84071581 | 84071726 |
| chr6 | 84232491 | 84232616 |
| chr6 | 84272381 | 84272486 |
| chr6 | 84459151 | 84459356 |
| chr6 | 84463811 | 84463916 |
| chr6 | 84606501 | 84606606 |
| chr6 | 84663441 | 84663596 |
| chr6 | 84745481 | 84745656 |
| chr6 | 84761841 | 84762026 |
| chr6 | 84889381 | 84889536 |
| chr6 | 85230601 | 85230736 |
| chr6 | 85230991 | 85231136 |
| chr6 | 85279591 | 85279786 |
| chr6 | 85988591 | 85988716 |
| chr6 | 86114281 | 86114386 |
| chr6 | 86309771 | 86309916 |
| chr6 | 86354291 | 86354576 |
| chr6 | 86897591 | 86897716 |
| chr6 | 86944621 | 86944766 |
| chr6 | 87185631 | 87185736 |
| chr6 | 87363841 | 87363976 |
| chr6 | 87418631 | 87418766 |
| chr6 | 87421271 | 87421436 |
| chr6 | 87449491 | 87449626 |
| chr6 | 87485581 | 87485696 |
| chr6 | 87490491 | 87490716 |
| chr6 | 87505661 | 87505766 |
| chr6 | 87998201 | 87998296 |
| chr6 | 88156471 | 88156736 |
| chr6 | 88510791 | 88510946 |
| chr6 | 88510981 | 88511146 |
| chr6 | 88732001 | 88732106 |
| chr6 | 88939421 | 88939556 |
| chr6 | 88939571 | 88939706 |
| chr6 | 89201281 | 89201566 |
| chr6 | 89204481 | 89204576 |
| chr6 | 89204691 | 89204876 |
| chr6 | 89208581 | 89208726 |
| chr6 | 89211321 | 89211416 |
| chr6 | 89247361 | 89247546 |
| chr6 | 90889121 | 90889296 |
| chr6 | 90902951 | 90903076 |
| chr6 | 91209731 | 91209836 |
| chr6 | 91210051 | 91210336 |
| chr6 | 91211481 | 91211626 |
| chr6 | 91264411 | 91264596 |
| chr6 | 91290331 | 91290446 |
| chr6 | 91290501 | 91290676 |

|      |          |          |
|------|----------|----------|
| chr6 | 91650881 | 91651026 |
| chr6 | 91666511 | 91666656 |
| chr6 | 91672731 | 91672806 |
| chr6 | 91672941 | 91673046 |
| chr6 | 91686221 | 91686316 |
| chr6 | 91695381 | 91695706 |
| chr6 | 91711881 | 91712096 |
| chr6 | 91810651 | 91810826 |
| chr6 | 91877891 | 91878006 |
| chr6 | 91929101 | 91929266 |
| chr6 | 92217571 | 92217716 |
| chr6 | 92217781 | 92218026 |
| chr6 | 92429271 | 92429516 |
| chr6 | 92429561 | 92429806 |
| chr6 | 92475931 | 92476086 |
| chr6 | 92589881 | 92589986 |
| chr6 | 92634711 | 92634916 |
| chr6 | 92642021 | 92642366 |
| chr6 | 92663621 | 92663816 |
| chr6 | 92707571 | 92707746 |
| chr6 | 92743781 | 92743976 |
| chr6 | 92743991 | 92744096 |
| chr6 | 92752251 | 92752446 |
| chr6 | 92805251 | 92805426 |
| chr6 | 92835221 | 92835786 |
| chr6 | 92871571 | 92871666 |
| chr6 | 92871721 | 92871826 |
| chr6 | 93029111 | 93029316 |
| chr6 | 93032131 | 93032496 |
| chr6 | 93190031 | 93190196 |
| chr6 | 93263621 | 93263786 |
| chr6 | 93356791 | 93357046 |
| chr6 | 93361541 | 93361766 |
| chr6 | 93411091 | 93411216 |
| chr6 | 93622731 | 93622996 |
| chr6 | 93666981 | 93667116 |
| chr6 | 93685121 | 93685236 |
| chr6 | 93735561 | 93735696 |
| chr6 | 93757861 | 93758036 |
| chr6 | 93952441 | 93952586 |
| chr6 | 93953131 | 93953346 |
| chr6 | 93994021 | 93994226 |
| chr6 | 94012461 | 94012556 |
| chr6 | 94026201 | 94026326 |
| chr6 | 94030541 | 94030666 |
| chr6 | 94033371 | 94033506 |
| chr6 | 94044471 | 94044596 |
| chr6 | 94116441 | 94116686 |
| chr6 | 94128711 | 94128956 |
| chr6 | 94189231 | 94189336 |
| chr6 | 94195481 | 94195586 |
| chr6 | 94199711 | 94199836 |
| chr6 | 94199981 | 94200106 |

|      |          |          |
|------|----------|----------|
| chr6 | 94204771 | 94204906 |
| chr6 | 94225011 | 94225236 |
| chr6 | 94242541 | 94242606 |
| chr6 | 94256911 | 94257016 |
| chr6 | 94366731 | 94367026 |
| chr6 | 94557911 | 94558126 |
| chr6 | 94558221 | 94558476 |
| chr6 | 94563941 | 94564086 |
| chr6 | 94621661 | 94621986 |
| chr6 | 94633801 | 94633976 |
| chr6 | 94642041 | 94642286 |
| chr6 | 94647111 | 94647226 |
| chr6 | 94658081 | 94658216 |
| chr6 | 94659061 | 94659186 |
| chr6 | 94695321 | 94695516 |
| chr6 | 94721041 | 94721186 |
| chr6 | 94732451 | 94732716 |
| chr6 | 94738031 | 94738196 |
| chr6 | 94738341 | 94738456 |
| chr6 | 94739111 | 94739306 |
| chr6 | 94739641 | 94739756 |
| chr6 | 94774511 | 94774596 |
| chr6 | 94937471 | 94937636 |
| chr6 | 94987511 | 94987616 |
| chr6 | 94989831 | 94989956 |
| chr6 | 95221911 | 95222056 |
| chr6 | 95278971 | 95279116 |
| chr6 | 95460871 | 95461006 |
| chr6 | 95479921 | 95480046 |
| chr6 | 95480881 | 95481056 |
| chr6 | 95599231 | 95599356 |
| chr6 | 95678831 | 95679026 |
| chr6 | 96364381 | 96364506 |
| chr6 | 96818231 | 96818396 |
| chr6 | 96874431 | 96874606 |
| chr6 | 97028991 | 97029106 |
| chr6 | 97070091 | 97070186 |
| chr6 | 97109871 | 97110006 |
| chr6 | 97276321 | 97276476 |
| chr6 | 97312191 | 97312336 |
| chr6 | 97314801 | 97314976 |
| chr6 | 97317891 | 97318036 |
| chr6 | 97320371 | 97320536 |
| chr6 | 97320561 | 97320796 |
| chr6 | 97321951 | 97322066 |
| chr6 | 97368431 | 97368526 |
| chr6 | 97368541 | 97368666 |
| chr6 | 97476311 | 97476446 |
| chr6 | 97485231 | 97485326 |
| chr6 | 97494721 | 97494926 |
| chr6 | 97517441 | 97517706 |
| chr6 | 97584241 | 97584566 |
| chr6 | 97631611 | 97631766 |

|      |          |          |
|------|----------|----------|
| chr6 | 97632791 | 97632926 |
| chr6 | 97649521 | 97649676 |
| chr6 | 97724581 | 97724766 |
| chr6 | 97842501 | 97842596 |
| chr6 | 97843171 | 97843266 |
| chr6 | 97848511 | 97848696 |
| chr6 | 97921901 | 97922016 |
| chr6 | 98007431 | 98007566 |
| chr6 | 98007721 | 98007906 |
| chr6 | 98014401 | 98014646 |
| chr6 | 98014771 | 98014926 |
| chr6 | 98554631 | 98554746 |
| chr6 | 98596831 | 98596956 |
| chr6 | 98597721 | 98597836 |
| chr6 | 98603011 | 98603086 |
| chr6 | 98603241 | 98603366 |
| chr6 | 98655841 | 98655976 |
| chr6 | 98903951 | 98904096 |
| chr6 | 98956461 | 98956626 |
| chr6 | 98970651 | 98971006 |
| chr6 | 98978621 | 98978826 |
| chr6 | 98979421 | 98979606 |
| chr6 | 98980661 | 98980956 |
| chr6 | 98984841 | 98985016 |
| chr6 | 98990161 | 98990316 |
| chr6 | 98990331 | 98990546 |
| chr6 | 98996861 | 98996976 |
| chr6 | 98997031 | 98997336 |
| chr6 | 98997391 | 98997606 |
| chr6 | 98997731 | 98997896 |
| chr6 | 98998641 | 98998796 |
| chr6 | 98998891 | 98999046 |
| chr6 | 99001711 | 99001816 |
| chr6 | 99008871 | 99009076 |
| chr6 | 99039141 | 99039316 |
| chr6 | 99046651 | 99046826 |
| chr6 | 99060181 | 99060406 |
| chr6 | 99061601 | 99061876 |
| chr6 | 99062491 | 99062596 |
| chr6 | 99062771 | 99062936 |
| chr6 | 99098691 | 99098826 |
| chr6 | 99099331 | 99099626 |
| chr6 | 99101451 | 99101716 |
| chr6 | 99103461 | 99103606 |
| chr6 | 99121291 | 99121426 |
| chr6 | 99121541 | 99121636 |
| chr6 | 99138791 | 99138966 |
| chr6 | 99139311 | 99139456 |
| chr6 | 99148201 | 99148306 |
| chr6 | 99155471 | 99155616 |
| chr6 | 99168761 | 99168886 |
| chr6 | 99169571 | 99169866 |
| chr6 | 99170561 | 99170726 |

|      |           |           |
|------|-----------|-----------|
| chr6 | 99189491  | 99189626  |
| chr6 | 99197281  | 99197436  |
| chr6 | 99197881  | 99198126  |
| chr6 | 99200531  | 99200666  |
| chr6 | 99233611  | 99233736  |
| chr6 | 99233781  | 99233926  |
| chr6 | 99241231  | 99241326  |
| chr6 | 99241651  | 99242076  |
| chr6 | 99255011  | 99255196  |
| chr6 | 99275441  | 99275586  |
| chr6 | 99276081  | 99276246  |
| chr6 | 99285491  | 99285606  |
| chr6 | 99293141  | 99293486  |
| chr6 | 99304701  | 99304866  |
| chr6 | 99313311  | 99313566  |
| chr6 | 99365311  | 99365546  |
| chr6 | 99375721  | 99375846  |
| chr6 | 99417121  | 99417326  |
| chr6 | 99417381  | 99417726  |
| chr6 | 99432561  | 99432936  |
| chr6 | 99434641  | 99434926  |
| chr6 | 99435601  | 99435826  |
| chr6 | 99475011  | 99475166  |
| chr6 | 99475311  | 99475456  |
| chr6 | 99477481  | 99477596  |
| chr6 | 99558591  | 99558776  |
| chr6 | 99580671  | 99580796  |
| chr6 | 99582201  | 99582376  |
| chr6 | 99602161  | 99602346  |
| chr6 | 99611951  | 99612156  |
| chr6 | 99734011  | 99734166  |
| chr6 | 99770491  | 99770776  |
| chr6 | 99890301  | 99890426  |
| chr6 | 99893451  | 99893606  |
| chr6 | 99945121  | 99945356  |
| chr6 | 99962111  | 99962306  |
| chr6 | 99965561  | 99965706  |
| chr6 | 99977311  | 99977576  |
| chr6 | 100011661 | 100011986 |
| chr6 | 100012071 | 100012206 |
| chr6 | 100020061 | 100020186 |
| chr6 | 100029491 | 100029646 |
| chr6 | 100044761 | 100044946 |
| chr6 | 100058601 | 100058776 |
| chr6 | 100084531 | 100084736 |
| chr6 | 100092461 | 100092576 |
| chr6 | 100092821 | 100093086 |
| chr6 | 100109911 | 100110016 |
| chr6 | 100125951 | 100126076 |
| chr6 | 100159241 | 100159366 |
| chr6 | 100183401 | 100183496 |
| chr6 | 100197811 | 100197966 |
| chr6 | 100277381 | 100277536 |

|      |           |           |
|------|-----------|-----------|
| chr6 | 100346091 | 100346216 |
| chr6 | 100387221 | 100387426 |
| chr6 | 100398181 | 100398506 |
| chr6 | 100398751 | 100398946 |
| chr6 | 100399041 | 100399226 |
| chr6 | 100402601 | 100402716 |
| chr6 | 100417731 | 100417966 |
| chr6 | 100464751 | 100464826 |
| chr6 | 100465941 | 100466456 |
| chr6 | 100483961 | 100484106 |
| chr6 | 100492451 | 100492616 |
| chr6 | 100516961 | 100517076 |
| chr6 | 100517691 | 100517876 |
| chr6 | 100533841 | 100533976 |
| chr6 | 100566991 | 100567236 |
| chr6 | 100766811 | 100766906 |
| chr6 | 100768911 | 100769096 |
| chr6 | 100848881 | 100848986 |
| chr6 | 100861361 | 100861606 |
| chr6 | 100873281 | 100873416 |
| chr6 | 100877931 | 100878076 |
| chr6 | 100878101 | 100878496 |
| chr6 | 100925291 | 100925456 |
| chr6 | 100937691 | 100937856 |
| chr6 | 100939321 | 100939516 |
| chr6 | 100939551 | 100939656 |
| chr6 | 100942521 | 100942626 |
| chr6 | 100943491 | 100943686 |
| chr6 | 100970861 | 100970976 |
| chr6 | 100971041 | 100971156 |
| chr6 | 101058331 | 101058516 |
| chr6 | 101064621 | 101064786 |
| chr6 | 101141311 | 101141496 |
| chr6 | 101150551 | 101150736 |
| chr6 | 101160571 | 101160686 |
| chr6 | 101164421 | 101164946 |
| chr6 | 101165041 | 101165226 |
| chr6 | 101171981 | 101172086 |
| chr6 | 101181491 | 101181686 |
| chr6 | 101193521 | 101193666 |
| chr6 | 101200411 | 101200616 |
| chr6 | 101200731 | 101201006 |
| chr6 | 101202381 | 101202606 |
| chr6 | 101203601 | 101203676 |
| chr6 | 101216391 | 101216546 |
| chr6 | 101221621 | 101221846 |
| chr6 | 101229161 | 101229376 |
| chr6 | 101237921 | 101238426 |
| chr6 | 101250721 | 101250856 |
| chr6 | 101274491 | 101274666 |
| chr6 | 101295651 | 101295806 |
| chr6 | 101295811 | 101295986 |
| chr6 | 101296731 | 101296876 |

|      |           |           |
|------|-----------|-----------|
| chr6 | 101299791 | 101299926 |
| chr6 | 101319791 | 101319916 |
| chr6 | 101340851 | 101341036 |
| chr6 | 101368211 | 101368366 |
| chr6 | 101378091 | 101378216 |
| chr6 | 101399081 | 101399296 |
| chr6 | 101400241 | 101400356 |
| chr6 | 101498721 | 101498826 |
| chr6 | 101847411 | 101847546 |
| chr6 | 103343841 | 103343936 |
| chr6 | 103463981 | 103464076 |
| chr6 | 103568051 | 103568226 |
| chr6 | 103658291 | 103658446 |
| chr6 | 103715261 | 103715396 |
| chr6 | 105459571 | 105459706 |
| chr6 | 106202891 | 106203106 |
| chr6 | 106203361 | 106203626 |
| chr6 | 106253801 | 106253926 |
| chr6 | 106559471 | 106559736 |
| chr6 | 106560041 | 106560186 |
| chr6 | 106571811 | 106571956 |
| chr6 | 106572031 | 106572186 |
| chr6 | 106710901 | 106711066 |
| chr6 | 106716141 | 106716276 |
| chr6 | 106762371 | 106762476 |
| chr6 | 106916801 | 106916956 |
| chr6 | 106978931 | 106979156 |
| chr6 | 106979291 | 106979426 |
| chr6 | 107780301 | 107780406 |
| chr6 | 108214931 | 108215126 |
| chr6 | 108224111 | 108224226 |
| chr6 | 108226191 | 108226386 |
| chr6 | 108496681 | 108496836 |
| chr6 | 108535181 | 108535296 |
| chr6 | 108536061 | 108536256 |
| chr6 | 108545801 | 108545926 |
| chr6 | 108628341 | 108628506 |
| chr6 | 108666401 | 108666936 |
| chr6 | 108668051 | 108668176 |
| chr6 | 108670481 | 108670786 |
| chr6 | 108671771 | 108672016 |
| chr6 | 108685191 | 108685336 |
| chr6 | 109840641 | 109840816 |
| chr6 | 111415731 | 111415856 |
| chr6 | 111418201 | 111418386 |
| chr6 | 112297021 | 112297266 |
| chr6 | 112518951 | 112519086 |
| chr6 | 112575121 | 112575236 |
| chr6 | 112775671 | 112775896 |
| chr6 | 112886511 | 112886826 |
| chr6 | 112898491 | 112898626 |
| chr6 | 112909521 | 112909626 |
| chr6 | 112909631 | 112909766 |

|      |           |           |
|------|-----------|-----------|
| chr6 | 112937981 | 112938156 |
| chr6 | 112938211 | 112938406 |
| chr6 | 112938611 | 112938796 |
| chr6 | 112938841 | 112939416 |
| chr6 | 112940511 | 112940626 |
| chr6 | 112983471 | 112983576 |
| chr6 | 112993181 | 112993376 |
| chr6 | 112996681 | 112996836 |
| chr6 | 113004391 | 113004556 |
| chr6 | 113004581 | 113004696 |
| chr6 | 113370901 | 113371026 |
| chr6 | 113411281 | 113411466 |
| chr6 | 113443221 | 113443466 |
| chr6 | 113453091 | 113453286 |
| chr6 | 113634411 | 113634576 |
| chr6 | 113655651 | 113656056 |
| chr6 | 113656731 | 113656886 |
| chr6 | 113951311 | 113951456 |
| chr6 | 113978461 | 113978646 |
| chr6 | 114128511 | 114128656 |
| chr6 | 114295471 | 114295606 |
| chr6 | 114313511 | 114313676 |
| chr6 | 114369221 | 114369366 |
| chr6 | 114390991 | 114391236 |
| chr6 | 114641931 | 114642046 |
| chr6 | 114752131 | 114752276 |
| chr6 | 114807731 | 114807846 |
| chr6 | 114840171 | 114840266 |
| chr6 | 114850601 | 114850746 |
| chr6 | 114854531 | 114854686 |
| chr6 | 114854731 | 114854976 |
| chr6 | 114866931 | 114867236 |
| chr6 | 114981211 | 114981386 |
| chr6 | 115008391 | 115008456 |
| chr6 | 115044941 | 115045036 |
| chr6 | 115431641 | 115431846 |
| chr6 | 115525051 | 115525456 |
| chr6 | 115610121 | 115610216 |
| chr6 | 115856821 | 115856946 |
| chr6 | 115893221 | 115893366 |
| chr6 | 116393971 | 116394086 |
| chr6 | 116455791 | 116456116 |
| chr6 | 116616251 | 116616436 |
| chr6 | 116632011 | 116632156 |
| chr6 | 116914021 | 116914156 |
| chr6 | 116998211 | 116998366 |
| chr6 | 117096341 | 117096516 |
| chr6 | 117124351 | 117124456 |
| chr6 | 117126051 | 117126206 |
| chr6 | 117176351 | 117176516 |
| chr6 | 117372481 | 117372576 |
| chr6 | 117373161 | 117373366 |
| chr6 | 117393241 | 117393576 |



|      |           |           |
|------|-----------|-----------|
| chr6 | 117474241 | 117474366 |
| chr6 | 117474691 | 117474826 |
| chr6 | 117492241 | 117492426 |
| chr6 | 117582851 | 117582976 |
| chr6 | 117766461 | 117766576 |
| chr6 | 117985851 | 117985976 |
| chr6 | 118152721 | 118152896 |
| chr6 | 118170981 | 118171096 |
| chr6 | 118229571 | 118229696 |
| chr6 | 118229711 | 118229886 |
| chr6 | 118230781 | 118230916 |
| chr6 | 118433181 | 118433326 |
| chr6 | 118688131 | 118688296 |
| chr6 | 118722471 | 118722826 |
| chr6 | 118798941 | 118799036 |
| chr6 | 118830461 | 118830736 |
| chr6 | 118887151 | 118887216 |
| chr6 | 119105291 | 119105476 |
| chr6 | 119349141 | 119349266 |
| chr6 | 119385131 | 119385316 |
| chr6 | 119403761 | 119404016 |
| chr6 | 119409081 | 119409316 |
| chr6 | 119458341 | 119458756 |
| chr6 | 119471111 | 119471476 |
| chr6 | 119609651 | 119609746 |
| chr6 | 119701021 | 119701206 |
| chr6 | 120201671 | 120201756 |
| chr6 | 120284331 | 120284436 |
| chr6 | 120489061 | 120489306 |
| chr6 | 120519231 | 120519376 |
| chr6 | 120590871 | 120591016 |
| chr6 | 120665801 | 120665956 |
| chr6 | 120814971 | 120815116 |
| chr6 | 120824001 | 120824166 |
| chr6 | 120941751 | 120941916 |
| chr6 | 120942411 | 120942536 |
| chr6 | 120942711 | 120943046 |
| chr6 | 120952701 | 120953036 |
| chr6 | 120953241 | 120953346 |
| chr6 | 120953611 | 120953716 |
| chr6 | 120991261 | 120991376 |
| chr6 | 120991991 | 120992266 |
| chr6 | 121011041 | 121011226 |
| chr6 | 121014191 | 121014336 |
| chr6 | 121074421 | 121074586 |
| chr6 | 121104211 | 121104426 |
| chr6 | 121110981 | 121111136 |
| chr6 | 121111191 | 121111336 |
| chr6 | 121111521 | 121111836 |
| chr6 | 121112721 | 121112986 |
| chr6 | 121113361 | 121113476 |
| chr6 | 121126021 | 121126176 |
| chr6 | 121128411 | 121128536 |

|      |           |           |
|------|-----------|-----------|
| chr6 | 121131731 | 121131916 |
| chr6 | 121132181 | 121132336 |
| chr6 | 121190701 | 121190866 |
| chr6 | 121265751 | 121265916 |
| chr6 | 121266321 | 121266456 |
| chr6 | 121311181 | 121311336 |
| chr6 | 121461601 | 121461756 |
| chr6 | 122460351 | 122460516 |
| chr6 | 122461321 | 122461506 |
| chr6 | 122627131 | 122627236 |
| chr6 | 122629501 | 122629726 |
| chr6 | 122710971 | 122711126 |
| chr6 | 122738431 | 122738596 |
| chr6 | 122746791 | 122746956 |
| chr6 | 122786971 | 122787086 |
| chr6 | 122789761 | 122790346 |
| chr6 | 122809571 | 122809706 |
| chr6 | 122885511 | 122885666 |
| chr6 | 123664561 | 123664726 |
| chr6 | 124411461 | 124411576 |
| chr6 | 124465951 | 124466146 |
| chr6 | 124653151 | 124653266 |
| chr6 | 124882101 | 124882316 |
| chr6 | 124960851 | 124960966 |
| chr6 | 125040001 | 125040126 |
| chr6 | 125123051 | 125123186 |
| chr6 | 125249971 | 125250096 |
| chr6 | 125386351 | 125386526 |
| chr6 | 125393141 | 125393346 |
| chr6 | 125421451 | 125421586 |
| chr6 | 125421841 | 125421986 |
| chr6 | 125421991 | 125422176 |
| chr6 | 125451431 | 125451556 |
| chr6 | 125562721 | 125562836 |
| chr6 | 125562851 | 125562996 |
| chr6 | 125769191 | 125769476 |
| chr6 | 126013711 | 126013826 |
| chr6 | 126153011 | 126153216 |
| chr6 | 126498861 | 126498976 |
| chr6 | 126499151 | 126499276 |
| chr6 | 126760541 | 126760646 |
| chr6 | 126760721 | 126760876 |
| chr6 | 127194201 | 127194346 |
| chr6 | 127212541 | 127212726 |
| chr6 | 127213241 | 127213346 |
| chr6 | 127216621 | 127216886 |
| chr6 | 127285001 | 127285106 |
| chr6 | 127297671 | 127297756 |
| chr6 | 127301091 | 127301416 |
| chr6 | 127306501 | 127306646 |
| chr6 | 127306811 | 127307056 |
| chr6 | 127315191 | 127315546 |
| chr6 | 127370131 | 127370376 |

|      |           |           |
|------|-----------|-----------|
| chr6 | 127515061 | 127515346 |
| chr6 | 127547771 | 127547876 |
| chr6 | 127548041 | 127548186 |
| chr6 | 127593191 | 127593356 |
| chr6 | 127666831 | 127667026 |
| chr6 | 127683401 | 127683626 |
| chr6 | 127722481 | 127722886 |
| chr6 | 127779481 | 127779566 |
| chr6 | 127821681 | 127821846 |
| chr6 | 127939631 | 127939866 |
| chr6 | 127984961 | 127985096 |
| chr6 | 127998351 | 127998506 |
| chr6 | 128008391 | 128008596 |
| chr6 | 128023691 | 128024106 |
| chr6 | 128024371 | 128024526 |
| chr6 | 128059631 | 128059776 |
| chr6 | 128099891 | 128100006 |
| chr6 | 128223031 | 128223236 |
| chr6 | 128431731 | 128431936 |
| chr6 | 128443861 | 128444046 |
| chr6 | 128562751 | 128562926 |
| chr6 | 129015341 | 129015506 |
| chr6 | 129507641 | 129507776 |
| chr6 | 129507821 | 129507996 |
| chr6 | 134007571 | 134007676 |
| chr6 | 134007821 | 134008036 |
| chr6 | 134009421 | 134009586 |
| chr6 | 134011851 | 134012116 |
| chr6 | 134013131 | 134013306 |
| chr6 | 134083331 | 134083466 |
| chr6 | 134121711 | 134121956 |
| chr6 | 134137431 | 134137556 |
| chr6 | 134173651 | 134173806 |
| chr6 | 134188371 | 134188636 |
| chr6 | 134397361 | 134397466 |
| chr6 | 134404951 | 134405216 |
| chr6 | 134416551 | 134416756 |
| chr6 | 134470631 | 134470766 |
| chr6 | 134531401 | 134531526 |
| chr6 | 134576171 | 134576576 |
| chr6 | 134828881 | 134829026 |
| chr6 | 134909361 | 134909486 |
| chr6 | 134927801 | 134928006 |
| chr6 | 134941561 | 134941696 |
| chr6 | 135041661 | 135041856 |
| chr6 | 135041991 | 135042166 |
| chr6 | 135104661 | 135104776 |
| chr6 | 135157501 | 135157656 |
| chr6 | 135195671 | 135195836 |
| chr6 | 135328221 | 135328386 |
| chr6 | 135426171 | 135426336 |
| chr6 | 135498441 | 135498646 |
| chr6 | 136396121 | 136396346 |

|      |           |           |
|------|-----------|-----------|
| chr6 | 136433271 | 136433436 |
| chr6 | 136507601 | 136507696 |
| chr6 | 136514921 | 136515076 |
| chr6 | 136921451 | 136921636 |
| chr6 | 137079701 | 137079766 |
| chr6 | 137091031 | 137091206 |
| chr6 | 137091471 | 137091726 |
| chr6 | 137099671 | 137099786 |
| chr6 | 137100031 | 137100146 |
| chr6 | 137152771 | 137153126 |
| chr6 | 137242001 | 137242116 |
| chr6 | 137313111 | 137313226 |
| chr6 | 137401971 | 137402126 |
| chr6 | 137402151 | 137402356 |
| chr6 | 137402471 | 137402656 |
| chr6 | 137639881 | 137640016 |
| chr6 | 137910851 | 137910936 |
| chr6 | 139551191 | 139551386 |
| chr6 | 139552711 | 139553036 |
| chr6 | 139554231 | 139554406 |
| chr6 | 139555421 | 139555556 |
| chr6 | 139557981 | 139558086 |
| chr6 | 139580441 | 139580606 |
| chr6 | 139928631 | 139928746 |
| chr6 | 139988981 | 139989426 |
| chr6 | 140008441 | 140008636 |
| chr6 | 140074651 | 140074776 |
| chr6 | 140201881 | 140202016 |
| chr6 | 140241361 | 140241506 |
| chr6 | 140241511 | 140241666 |
| chr6 | 140263271 | 140263416 |
| chr6 | 140338091 | 140338266 |
| chr6 | 140454571 | 140454686 |
| chr6 | 140471441 | 140471646 |
| chr6 | 140471721 | 140471916 |
| chr6 | 140508991 | 140509056 |
| chr6 | 140509371 | 140509556 |
| chr6 | 140510491 | 140510646 |
| chr6 | 140539451 | 140539626 |
| chr6 | 140641171 | 140641296 |
| chr6 | 140645291 | 140645506 |
| chr6 | 140693601 | 140693736 |
| chr6 | 140731331 | 140731546 |
| chr6 | 140731591 | 140732016 |
| chr6 | 140773421 | 140773606 |
| chr6 | 140779271 | 140779406 |
| chr6 | 140851171 | 140851356 |
| chr6 | 140924581 | 140924696 |
| chr6 | 140924701 | 140924876 |
| chr6 | 140977351 | 140977526 |
| chr6 | 141073871 | 141074076 |
| chr6 | 141343601 | 141343696 |
| chr6 | 141343941 | 141344126 |

|      |           |           |
|------|-----------|-----------|
| chr6 | 142002821 | 142002966 |
| chr6 | 142561271 | 142561426 |
| chr6 | 142770501 | 142770616 |
| chr6 | 142788551 | 142788706 |
| chr6 | 142813731 | 142813866 |
| chr6 | 142824881 | 142824976 |
| chr6 | 142833791 | 142834006 |
| chr6 | 142895781 | 142895926 |
| chr6 | 142937271 | 142937496 |
| chr6 | 142951371 | 142951476 |
| chr6 | 143109621 | 143109936 |
| chr6 | 143122321 | 143122466 |
| chr6 | 143136211 | 143136346 |
| chr6 | 143178411 | 143178506 |
| chr6 | 143181431 | 143181576 |
| chr6 | 143216661 | 143216786 |
| chr6 | 143217311 | 143217466 |
| chr6 | 143217561 | 143217726 |
| chr6 | 143217841 | 143218046 |
| chr6 | 143218481 | 143218746 |
| chr6 | 143219031 | 143219176 |
| chr6 | 143221851 | 143222006 |
| chr6 | 143246291 | 143246426 |
| chr6 | 143246471 | 143246646 |
| chr6 | 143251901 | 143252096 |
| chr6 | 143325951 | 143326096 |
| chr6 | 143332381 | 143332476 |
| chr6 | 143812911 | 143813096 |
| chr6 | 143813121 | 143813246 |
| chr6 | 143875951 | 143876056 |
| chr6 | 143996591 | 143996686 |
| chr6 | 143997271 | 143997426 |
| chr6 | 143999371 | 143999606 |
| chr6 | 144108371 | 144108516 |
| chr6 | 144112281 | 144112626 |
| chr6 | 144123381 | 144123576 |
| chr6 | 144166751 | 144166876 |
| chr6 | 144167781 | 144168006 |
| chr6 | 144168071 | 144168226 |
| chr6 | 144174631 | 144174756 |
| chr6 | 144209111 | 144209316 |
| chr6 | 144209641 | 144209776 |
| chr6 | 144221451 | 144221606 |
| chr6 | 144235751 | 144235936 |
| chr6 | 144423991 | 144424086 |
| chr6 | 144441401 | 144441536 |
| chr6 | 144441841 | 144442036 |
| chr6 | 144449061 | 144449236 |
| chr6 | 144536691 | 144536866 |
| chr6 | 144564461 | 144564586 |
| chr6 | 144705761 | 144705866 |
| chr6 | 144860411 | 144860626 |
| chr6 | 144874541 | 144874676 |

|      |           |           |
|------|-----------|-----------|
| chr6 | 144902451 | 144902546 |
| chr6 | 144959431 | 144959526 |
| chr6 | 144979571 | 144979766 |
| chr6 | 145008211 | 145008356 |
| chr6 | 145338471 | 145338576 |
| chr6 | 145422521 | 145422646 |
| chr6 | 145430981 | 145431146 |
| chr6 | 145496471 | 145496566 |
| chr6 | 145496691 | 145496886 |
| chr6 | 145551261 | 145551416 |
| chr6 | 145551461 | 145551646 |
| chr6 | 145637931 | 145638086 |
| chr6 | 145668621 | 145668726 |
| chr6 | 145670521 | 145670616 |
| chr6 | 145788011 | 145788136 |
| chr6 | 145815811 | 145816026 |
| chr6 | 146037991 | 146038106 |
| chr6 | 146068401 | 146068606 |
| chr6 | 146178681 | 146178826 |
| chr6 | 146295431 | 146295586 |
| chr6 | 146317501 | 146317596 |
| chr6 | 146418301 | 146418396 |
| chr6 | 146840951 | 146841106 |
| chr6 | 146890561 | 146890686 |
| chr6 | 146922501 | 146922626 |
| chr6 | 146936871 | 146937036 |
| chr6 | 146990331 | 146990436 |
| chr6 | 147103141 | 147103246 |
| chr6 | 147190081 | 147190186 |
| chr6 | 147349071 | 147349236 |
| chr6 | 147384291 | 147384386 |
| chr6 | 147532501 | 147532636 |
| chr6 | 147783221 | 147783356 |
| chr6 | 148211781 | 148211916 |
| chr6 | 148216391 | 148216586 |
| chr6 | 148349441 | 148349556 |
| chr6 | 148425091 | 148425206 |
| chr6 | 149209411 | 149209566 |
| chr6 | 149313121 | 149313276 |
| chr5 | 3507551   | 3507876   |
| chr5 | 3508751   | 3508866   |
| chr5 | 4263211   | 4263366   |
| chr5 | 4315961   | 4316096   |
| chr5 | 4318711   | 4319006   |
| chr5 | 4332441   | 4332666   |
| chr5 | 4348041   | 4348186   |
| chr5 | 4502641   | 4502846   |
| chr5 | 4567741   | 4567836   |
| chr5 | 4840861   | 4841016   |
| chr5 | 4976741   | 4976966   |
| chr5 | 5098901   | 5099006   |
| chr5 | 5268021   | 5268176   |
| chr5 | 5271461   | 5271606   |

|      |          |          |
|------|----------|----------|
| chr5 | 5271941  | 5272066  |
| chr5 | 5513681  | 5513926  |
| chr5 | 5679571  | 5679736  |
| chr5 | 5683451  | 5683556  |
| chr5 | 7977721  | 7977876  |
| chr5 | 8844181  | 8844326  |
| chr5 | 9049211  | 9049346  |
| chr5 | 12513741 | 12513866 |
| chr5 | 12601171 | 12601236 |
| chr5 | 12640551 | 12640656 |
| chr5 | 12981241 | 12981456 |
| chr5 | 13131321 | 13131456 |
| chr5 | 13150811 | 13150916 |
| chr5 | 13204071 | 13204286 |
| chr5 | 13320011 | 13320176 |
| chr5 | 13320271 | 13320396 |
| chr5 | 13324821 | 13324906 |
| chr5 | 13408451 | 13408556 |
| chr5 | 13474911 | 13475176 |
| chr5 | 13998911 | 13999066 |
| chr5 | 13999081 | 13999226 |
| chr5 | 14046311 | 14046466 |
| chr5 | 14098831 | 14098966 |
| chr5 | 14134111 | 14134256 |
| chr5 | 14222451 | 14222566 |
| chr5 | 15304751 | 15304906 |
| chr5 | 15497021 | 15497166 |
| chr5 | 15505101 | 15505276 |
| chr5 | 15514261 | 15514516 |
| chr5 | 15633161 | 15633446 |
| chr5 | 15982351 | 15982596 |
| chr5 | 16087861 | 16088026 |
| chr5 | 16090211 | 16090416 |
| chr5 | 16158381 | 16158536 |
| chr5 | 16948201 | 16948276 |
| chr5 | 17239301 | 17239396 |
| chr5 | 17239411 | 17239476 |
| chr5 | 17259201 | 17259316 |
| chr5 | 17350411 | 17350526 |
| chr5 | 17400581 | 17400776 |
| chr5 | 19149971 | 19150156 |
| chr5 | 19191771 | 19191906 |
| chr5 | 19235581 | 19235676 |
| chr5 | 19259171 | 19259296 |
| chr5 | 19262021 | 19262136 |
| chr5 | 19912701 | 19912816 |
| chr5 | 20021561 | 20021706 |
| chr5 | 20024301 | 20024556 |
| chr5 | 20067101 | 20067256 |
| chr5 | 20095091 | 20095256 |
| chr5 | 20102021 | 20102126 |
| chr5 | 20121561 | 20121636 |
| chr5 | 20193641 | 20193976 |

|      |          |          |
|------|----------|----------|
| chr5 | 20391871 | 20392016 |
| chr5 | 20441391 | 20441496 |
| chr5 | 20447711 | 20447876 |
| chr5 | 20553071 | 20553236 |
| chr5 | 20893901 | 20894066 |
| chr5 | 21038981 | 21039396 |
| chr5 | 21040351 | 21040506 |
| chr5 | 21040601 | 21040716 |
| chr5 | 21185151 | 21185396 |
| chr5 | 21186801 | 21187006 |
| chr5 | 21236771 | 21236956 |
| chr5 | 21244801 | 21244986 |
| chr5 | 21446721 | 21446886 |
| chr5 | 21534461 | 21534606 |
| chr5 | 21547131 | 21547336 |
| chr5 | 21560571 | 21560676 |
| chr5 | 21584461 | 21584606 |
| chr5 | 21605071 | 21605186 |
| chr5 | 21707201 | 21707416 |
| chr5 | 21964771 | 21964986 |
| chr5 | 22897671 | 22897836 |
| chr5 | 22925931 | 22926096 |
| chr5 | 23280801 | 23280976 |
| chr5 | 23281011 | 23281166 |
| chr5 | 23418511 | 23418656 |
| chr5 | 23506141 | 23506296 |
| chr5 | 23839651 | 23840016 |
| chr5 | 24009351 | 24009446 |
| chr5 | 24126201 | 24126386 |
| chr5 | 24178111 | 24178216 |
| chr5 | 24194761 | 24194896 |
| chr5 | 24388461 | 24388616 |
| chr5 | 24388661 | 24388746 |
| chr5 | 24445831 | 24445996 |
| chr5 | 24516291 | 24516496 |
| chr5 | 24757701 | 24757776 |
| chr5 | 26623091 | 26623286 |
| chr5 | 27238151 | 27238326 |
| chr5 | 27263221 | 27263406 |
| chr5 | 28039091 | 28039226 |
| chr5 | 29274301 | 29274696 |
| chr5 | 29274891 | 29275026 |
| chr5 | 29279191 | 29279376 |
| chr5 | 29811941 | 29812156 |
| chr5 | 29827681 | 29827776 |
| chr5 | 29827881 | 29828106 |
| chr5 | 30586861 | 30587006 |
| chr5 | 31026701 | 31026856 |
| chr5 | 31189881 | 31190056 |
| chr5 | 31276881 | 31277026 |
| chr5 | 31332491 | 31332636 |
| chr5 | 31359661 | 31359846 |
| chr5 | 31538681 | 31538836 |



|      |          |          |
|------|----------|----------|
| chr5 | 31538871 | 31539026 |
| chr5 | 31853441 | 31853696 |
| chr5 | 31904511 | 31904626 |
| chr5 | 31904741 | 31904896 |
| chr5 | 31995551 | 31995666 |
| chr5 | 32087521 | 32087656 |
| chr5 | 32087811 | 32087936 |
| chr5 | 32392111 | 32392266 |
| chr5 | 32403651 | 32403826 |
| chr5 | 32417741 | 32417836 |
| chr5 | 32472501 | 32472806 |
| chr5 | 32589681 | 32589766 |
| chr5 | 32699031 | 32699166 |
| chr5 | 32702271 | 32702376 |
| chr5 | 32721911 | 32722186 |
| chr5 | 32771101 | 32771216 |
| chr5 | 32974271 | 32974416 |
| chr5 | 33220531 | 33220856 |
| chr5 | 33360281 | 33360426 |
| chr5 | 33360431 | 33360656 |
| chr5 | 33419811 | 33419926 |
| chr5 | 33536031 | 33536166 |
| chr5 | 33610741 | 33610976 |
| chr5 | 33611111 | 33611286 |
| chr5 | 33812461 | 33812656 |
| chr5 | 33822731 | 33822836 |
| chr5 | 33828891 | 33829016 |
| chr5 | 33844811 | 33845636 |
| chr5 | 33846311 | 33846446 |
| chr5 | 33873291 | 33873766 |
| chr5 | 33874831 | 33874956 |
| chr5 | 33875061 | 33875336 |
| chr5 | 33884741 | 33884886 |
| chr5 | 33904551 | 33904696 |
| chr5 | 34009281 | 34009446 |
| chr5 | 34011891 | 34012046 |
| chr5 | 34021061 | 34021166 |
| chr5 | 34022491 | 34022736 |
| chr5 | 34040891 | 34041056 |
| chr5 | 34899801 | 34899916 |
| chr5 | 35742081 | 35742386 |
| chr5 | 35771181 | 35771376 |
| chr5 | 35810681 | 35810856 |
| chr5 | 35810861 | 35811096 |
| chr5 | 35812921 | 35813176 |
| chr5 | 35813281 | 35813556 |
| chr5 | 35814501 | 35814636 |
| chr5 | 35822111 | 35822296 |
| chr5 | 35987111 | 35987266 |
| chr5 | 36225061 | 36225296 |
| chr5 | 36238981 | 36239146 |
| chr5 | 36371751 | 36371936 |
| chr5 | 36405581 | 36405686 |

|      |          |          |
|------|----------|----------|
| chr5 | 36430051 | 36430216 |
| chr5 | 36545941 | 36546126 |
| chr5 | 36547611 | 36547846 |
| chr5 | 36630951 | 36631186 |
| chr5 | 36635231 | 36635386 |
| chr5 | 36635491 | 36635646 |
| chr5 | 36647611 | 36647766 |
| chr5 | 36647921 | 36648226 |
| chr5 | 36690541 | 36690796 |
| chr5 | 36690841 | 36690996 |
| chr5 | 36693141 | 36693296 |
| chr5 | 36693461 | 36693586 |
| chr5 | 36702311 | 36702486 |
| chr5 | 37000551 | 37000706 |
| chr5 | 37002131 | 37002366 |
| chr5 | 37173161 | 37173296 |
| chr5 | 37176101 | 37176236 |
| chr5 | 37385841 | 37386026 |
| chr5 | 37510011 | 37510236 |
| chr5 | 37938931 | 37939036 |
| chr5 | 37939261 | 37939406 |
| chr5 | 38139731 | 38139916 |
| chr5 | 38140011 | 38140146 |
| chr5 | 38146481 | 38146606 |
| chr5 | 38180461 | 38180696 |
| chr5 | 38184411 | 38184526 |
| chr5 | 38206521 | 38206606 |
| chr5 | 38256331 | 38256566 |
| chr5 | 38263311 | 38263536 |
| chr5 | 38295261 | 38295536 |
| chr5 | 38321231 | 38321456 |
| chr5 | 38352961 | 38353226 |
| chr5 | 38364751 | 38364896 |
| chr5 | 38370981 | 38371126 |
| chr5 | 38373011 | 38373236 |
| chr5 | 38373781 | 38373966 |
| chr5 | 38487251 | 38487376 |
| chr5 | 38574141 | 38574326 |
| chr5 | 38591151 | 38591336 |
| chr5 | 38676721 | 38676996 |
| chr5 | 38768831 | 38768996 |
| chr5 | 39076531 | 39076626 |
| chr5 | 39143311 | 39143476 |
| chr5 | 41866621 | 41866756 |
| chr5 | 43072131 | 43072226 |
| chr5 | 43405141 | 43405206 |
| chr5 | 43405241 | 43405366 |
| chr5 | 43405381 | 43405446 |
| chr5 | 43641711 | 43642166 |
| chr5 | 44271861 | 44272046 |
| chr5 | 44341411 | 44341556 |
| chr5 | 44772611 | 44772856 |
| chr5 | 44803271 | 44803446 |

|      |          |          |
|------|----------|----------|
| chr5 | 44805731 | 44805816 |
| chr5 | 44826421 | 44826556 |
| chr5 | 44844521 | 44844616 |
| chr5 | 44915901 | 44915996 |
| chr5 | 44932061 | 44932186 |
| chr5 | 44942661 | 44942876 |
| chr5 | 45010631 | 45010766 |
| chr5 | 45011131 | 45011306 |
| chr5 | 45570541 | 45570666 |
| chr5 | 45570931 | 45571076 |
| chr5 | 45656821 | 45656936 |
| chr5 | 45852551 | 45852666 |
| chr5 | 45861271 | 45861386 |
| chr5 | 46439411 | 46439606 |
| chr5 | 46609541 | 46609676 |
| chr5 | 46733621 | 46733806 |
| chr5 | 46954651 | 46954866 |
| chr5 | 47119181 | 47119316 |
| chr5 | 47404281 | 47404406 |
| chr5 | 47561981 | 47562186 |
| chr5 | 48061311 | 48061466 |
| chr5 | 48292481 | 48292646 |
| chr5 | 48297291 | 48297446 |
| chr5 | 48470321 | 48470496 |
| chr5 | 48629531 | 48629666 |
| chr5 | 48778271 | 48778376 |
| chr5 | 49089571 | 49089686 |
| chr5 | 51766861 | 51767016 |
| chr5 | 51782941 | 51783066 |
| chr5 | 51786281 | 51786496 |
| chr5 | 51832591 | 51832736 |
| chr5 | 51840851 | 51840966 |
| chr5 | 51873691 | 51873916 |
| chr5 | 52279281 | 52279436 |
| chr5 | 52620581 | 52620736 |
| chr5 | 52645971 | 52646126 |
| chr5 | 52652961 | 52653176 |
| chr5 | 52679321 | 52679466 |
| chr5 | 52932191 | 52932336 |
| chr5 | 52932411 | 52932526 |
| chr5 | 53347091 | 53347216 |
| chr5 | 53497951 | 53498056 |
| chr5 | 53528161 | 53528386 |
| chr5 | 53554181 | 53554336 |
| chr5 | 53576101 | 53576236 |
| chr5 | 53647101 | 53647316 |
| chr5 | 53709791 | 53709946 |
| chr5 | 53759581 | 53759696 |
| chr5 | 53807981 | 53808196 |
| chr5 | 53813951 | 53814086 |
| chr5 | 53814151 | 53814236 |
| chr5 | 53840261 | 53840426 |
| chr5 | 53958281 | 53958376 |

|      |          |          |
|------|----------|----------|
| chr5 | 54305501 | 54305656 |
| chr5 | 54446581 | 54446846 |
| chr5 | 54469651 | 54469806 |
| chr5 | 54488601 | 54488736 |
| chr5 | 54521421 | 54521556 |
| chr5 | 54542341 | 54542526 |
| chr5 | 54559481 | 54559656 |
| chr5 | 54567691 | 54567876 |
| chr5 | 54578641 | 54578706 |
| chr5 | 54578761 | 54579016 |
| chr5 | 55012781 | 55012916 |
| chr5 | 56514361 | 56514516 |
| chr5 | 58157031 | 58157116 |
| chr5 | 58395251 | 58395376 |
| chr5 | 58407571 | 58407806 |
| chr5 | 58546781 | 58546846 |
| chr5 | 59035971 | 59036226 |
| chr5 | 62961221 | 62961326 |
| chr5 | 63813251 | 63813476 |
| chr5 | 64154081 | 64154286 |
| chr5 | 64159271 | 64159436 |
| chr5 | 64225381 | 64225536 |
| chr5 | 64229991 | 64230096 |
| chr5 | 64246581 | 64246726 |
| chr5 | 64249411 | 64249616 |
| chr5 | 64326121 | 64326336 |
| chr5 | 64422741 | 64422886 |
| chr5 | 64464461 | 64464586 |
| chr5 | 64485141 | 64485266 |
| chr5 | 64486131 | 64486286 |
| chr5 | 64520191 | 64520316 |
| chr5 | 64522651 | 64523126 |
| chr5 | 64523881 | 64524026 |
| chr5 | 64530721 | 64530846 |
| chr5 | 64532861 | 64533006 |
| chr5 | 64533071 | 64533286 |
| chr5 | 64533581 | 64533676 |
| chr5 | 64548891 | 64549046 |
| chr5 | 64593591 | 64593756 |
| chr5 | 64614331 | 64614626 |
| chr5 | 64624411 | 64624716 |
| chr5 | 64677531 | 64677656 |
| chr5 | 64681231 | 64681346 |
| chr5 | 64702361 | 64702636 |
| chr5 | 64727091 | 64727256 |
| chr5 | 64815471 | 64815856 |
| chr5 | 64816031 | 64816336 |
| chr5 | 64855101 | 64855206 |
| chr5 | 64856491 | 64856626 |
| chr5 | 64876271 | 64876456 |
| chr5 | 64885251 | 64885346 |
| chr5 | 64897971 | 64898126 |
| chr5 | 65018441 | 65018646 |

|      |          |          |
|------|----------|----------|
| chr5 | 65036011 | 65036156 |
| chr5 | 65087391 | 65087496 |
| chr5 | 65095921 | 65096016 |
| chr5 | 65110331 | 65110466 |
| chr5 | 65146411 | 65146656 |
| chr5 | 65157421 | 65157546 |
| chr5 | 65307281 | 65307506 |
| chr5 | 65308641 | 65308856 |
| chr5 | 65382021 | 65382126 |
| chr5 | 65410201 | 65410396 |
| chr5 | 65424361 | 65424476 |
| chr5 | 65627271 | 65627956 |
| chr5 | 65638591 | 65638716 |
| chr5 | 65764901 | 65765156 |
| chr5 | 66010691 | 66010786 |
| chr5 | 66322041 | 66322196 |
| chr5 | 66424441 | 66424576 |
| chr5 | 66453431 | 66453596 |
| chr5 | 66453741 | 66453876 |
| chr5 | 66479301 | 66479406 |
| chr5 | 66625181 | 66625286 |
| chr5 | 66706911 | 66707076 |
| chr5 | 66755731 | 66756086 |
| chr5 | 66814811 | 66814956 |
| chr5 | 66852401 | 66852616 |
| chr5 | 66990511 | 66990656 |
| chr5 | 67079481 | 67079686 |
| chr5 | 67197641 | 67197796 |
| chr5 | 67244721 | 67245026 |
| chr5 | 67247141 | 67247626 |
| chr5 | 67417801 | 67417956 |
| chr5 | 67418841 | 67419016 |
| chr5 | 67428641 | 67428786 |
| chr5 | 67430161 | 67430286 |
| chr5 | 67484631 | 67484716 |
| chr5 | 67492261 | 67492586 |
| chr5 | 67494251 | 67494436 |
| chr5 | 67494761 | 67494926 |
| chr5 | 67501951 | 67502206 |
| chr5 | 67508101 | 67508236 |
| chr5 | 67535021 | 67535126 |
| chr5 | 67592381 | 67592546 |
| chr5 | 67690711 | 67690806 |
| chr5 | 67724831 | 67724976 |
| chr5 | 67757211 | 67757486 |
| chr5 | 67767081 | 67767356 |
| chr5 | 67823301 | 67823406 |
| chr5 | 67823591 | 67823786 |
| chr5 | 67886061 | 67886156 |
| chr5 | 67934951 | 67935106 |
| chr5 | 67936031 | 67936146 |
| chr5 | 68032431 | 68032576 |
| chr5 | 68094881 | 68095076 |

|      |          |          |
|------|----------|----------|
| chr5 | 68101791 | 68101946 |
| chr5 | 68143391 | 68143476 |
| chr5 | 68490381 | 68490536 |
| chr5 | 68591121 | 68591296 |
| chr5 | 68631071 | 68631206 |
| chr5 | 69014511 | 69014616 |
| chr5 | 72543481 | 72543846 |
| chr5 | 72559411 | 72559596 |
| chr5 | 72608711 | 72608816 |
| chr5 | 72609881 | 72610056 |
| chr5 | 72646901 | 72647066 |
| chr5 | 72690991 | 72691156 |
| chr5 | 73050711 | 73050806 |
| chr5 | 73063241 | 73063466 |
| chr5 | 73090271 | 73090596 |
| chr5 | 73274711 | 73274836 |
| chr5 | 73371421 | 73371716 |
| chr5 | 73372861 | 73373046 |
| chr5 | 73417031 | 73417176 |
| chr5 | 73447961 | 73448126 |
| chr5 | 73544771 | 73544916 |
| chr5 | 73662801 | 73662936 |
| chr5 | 73777791 | 73777936 |
| chr5 | 74222321 | 74222416 |
| chr5 | 74222511 | 74222636 |
| chr5 | 74462061 | 74462306 |
| chr5 | 74511151 | 74511356 |
| chr5 | 74523451 | 74523576 |
| chr5 | 74609051 | 74609156 |
| chr5 | 74646631 | 74646766 |
| chr5 | 74714571 | 74714796 |
| chr5 | 74867511 | 74867656 |
| chr5 | 75107321 | 75107496 |
| chr5 | 75161471 | 75161586 |
| chr5 | 75186711 | 75186846 |
| chr5 | 75187311 | 75187456 |
| chr5 | 75202401 | 75202556 |
| chr5 | 75214011 | 75214136 |
| chr5 | 75239071 | 75239176 |
| chr5 | 75261931 | 75262136 |
| chr5 | 75324681 | 75324836 |
| chr5 | 75456301 | 75456436 |
| chr5 | 75521111 | 75521326 |
| chr5 | 75659131 | 75659296 |
| chr5 | 75659321 | 75659496 |
| chr5 | 75749831 | 75749926 |
| chr5 | 75760811 | 75760946 |
| chr5 | 75765741 | 75765926 |
| chr5 | 75819861 | 75819956 |
| chr5 | 75878021 | 75878176 |
| chr5 | 75881461 | 75881646 |
| chr5 | 75881671 | 75881836 |
| chr5 | 75882641 | 75882766 |

|      |          |          |
|------|----------|----------|
| chr5 | 75884411 | 75884616 |
| chr5 | 75892161 | 75892306 |
| chr5 | 75943901 | 75943996 |
| chr5 | 75944251 | 75944386 |
| chr5 | 75950321 | 75950656 |
| chr5 | 76112201 | 76112306 |
| chr5 | 76188171 | 76188326 |
| chr5 | 76203331 | 76203706 |
| chr5 | 77251811 | 77251926 |
| chr5 | 77415861 | 77415976 |
| chr5 | 77733531 | 77733646 |
| chr5 | 77739481 | 77739656 |
| chr5 | 77740231 | 77740486 |
| chr5 | 77889991 | 77890186 |
| chr5 | 78185161 | 78185256 |
| chr5 | 78185351 | 78185546 |
| chr5 | 78320481 | 78320846 |
| chr5 | 78320951 | 78321096 |
| chr5 | 78332201 | 78332326 |
| chr5 | 78527101 | 78527206 |
| chr5 | 78552651 | 78552746 |
| chr5 | 78621001 | 78621116 |
| chr5 | 78802661 | 78802746 |
| chr5 | 82098441 | 82098736 |
| chr5 | 82098771 | 82098866 |
| chr5 | 82417791 | 82417946 |
| chr5 | 82438751 | 82438876 |
| chr5 | 82484381 | 82484626 |
| chr5 | 82583681 | 82583816 |
| chr5 | 82599111 | 82599386 |
| chr5 | 82610691 | 82610786 |
| chr5 | 82610801 | 82610886 |
| chr5 | 82669241 | 82669496 |
| chr5 | 82669981 | 82670106 |
| chr5 | 84109011 | 84109176 |
| chr5 | 84971421 | 84971576 |
| chr5 | 86798571 | 86798666 |
| chr5 | 86818881 | 86818976 |
| chr5 | 86855661 | 86855916 |
| chr5 | 87497031 | 87497136 |
| chr5 | 87974511 | 87974626 |
| chr5 | 88769411 | 88769596 |
| chr5 | 89658721 | 89658846 |
| chr5 | 89662151 | 89662306 |
| chr5 | 89745671 | 89745806 |
| chr5 | 89871201 | 89871336 |
| chr5 | 89871451 | 89871586 |
| chr5 | 89871921 | 89872086 |
| chr5 | 90005361 | 90005556 |
| chr5 | 90043611 | 90043736 |
| chr5 | 90173001 | 90173106 |
| chr5 | 90222131 | 90222306 |
| chr5 | 90657061 | 90657216 |

|      |          |          |
|------|----------|----------|
| chr5 | 90687331 | 90687506 |
| chr5 | 91404671 | 91404806 |
| chr5 | 91506441 | 91506606 |
| chr5 | 91542631 | 91542836 |
| chr5 | 91574981 | 91575086 |
| chr5 | 91644801 | 91644946 |
| chr5 | 91955801 | 91955906 |
| chr5 | 92090411 | 92090676 |
| chr5 | 92633281 | 92633406 |
| chr5 | 92766301 | 92766446 |
| chr5 | 92769111 | 92769216 |
| chr5 | 92814801 | 92814906 |
| chr5 | 93332781 | 93332906 |
| chr5 | 93338761 | 93339016 |
| chr5 | 93428951 | 93429076 |
| chr5 | 93452341 | 93452436 |
| chr5 | 93469221 | 93469346 |
| chr5 | 93759291 | 93759416 |
| chr5 | 93767501 | 93767676 |
| chr5 | 93767701 | 93767846 |
| chr5 | 93773611 | 93773806 |
| chr5 | 93773831 | 93774016 |
| chr5 | 93777031 | 93777156 |
| chr5 | 93821201 | 93821356 |
| chr5 | 93827671 | 93827846 |
| chr5 | 93859661 | 93859806 |
| chr5 | 93880901 | 93881056 |
| chr5 | 93892341 | 93892566 |
| chr5 | 93898421 | 93898856 |
| chr5 | 93916731 | 93916806 |
| chr5 | 93917731 | 93917976 |
| chr5 | 93919361 | 93919516 |
| chr5 | 93935811 | 93935996 |
| chr5 | 93936021 | 93936166 |
| chr5 | 93942311 | 93942426 |
| chr5 | 93946351 | 93946506 |
| chr5 | 93957771 | 93958256 |
| chr5 | 94006571 | 94006726 |
| chr5 | 94081521 | 94081646 |
| chr5 | 94102671 | 94102776 |
| chr5 | 94172481 | 94172636 |
| chr5 | 94173091 | 94173436 |
| chr5 | 94174191 | 94174386 |
| chr5 | 94176561 | 94176756 |
| chr5 | 94177131 | 94177236 |
| chr5 | 94209061 | 94209226 |
| chr5 | 94219031 | 94219266 |
| chr5 | 94372101 | 94372256 |
| chr5 | 96707101 | 96707176 |
| chr5 | 96712441 | 96712556 |
| chr5 | 96875441 | 96875706 |
| chr5 | 96943131 | 96943286 |
| chr5 | 96943551 | 96943826 |



|      |           |           |
|------|-----------|-----------|
| chr5 | 97042491  | 97042626  |
| chr5 | 97042641  | 97042836  |
| chr5 | 97111381  | 97111566  |
| chr5 | 97194451  | 97194576  |
| chr5 | 97209051  | 97209186  |
| chr5 | 97209191  | 97209356  |
| chr5 | 97220231  | 97220426  |
| chr5 | 97297431  | 97297546  |
| chr5 | 97318091  | 97318216  |
| chr5 | 97343801  | 97344006  |
| chr5 | 97435311  | 97435486  |
| chr5 | 97435781  | 97435906  |
| chr5 | 97463421  | 97463606  |
| chr5 | 97540061  | 97540146  |
| chr5 | 98617051  | 98617146  |
| chr5 | 98756631  | 98756796  |
| chr5 | 98972431  | 98972656  |
| chr5 | 99048241  | 99048516  |
| chr5 | 99067681  | 99068006  |
| chr5 | 99082711  | 99082946  |
| chr5 | 99317601  | 99317726  |
| chr5 | 99324341  | 99324556  |
| chr5 | 99431311  | 99431416  |
| chr5 | 99477591  | 99477736  |
| chr5 | 99487501  | 99487646  |
| chr5 | 99491711  | 99491886  |
| chr5 | 99519811  | 99519936  |
| chr5 | 99626111  | 99626306  |
| chr5 | 99641211  | 99641356  |
| chr5 | 99642741  | 99643066  |
| chr5 | 99709631  | 99709766  |
| chr5 | 99709921  | 99710056  |
| chr5 | 99715381  | 99715476  |
| chr5 | 99719701  | 99719796  |
| chr5 | 99763261  | 99763416  |
| chr5 | 99793151  | 99793286  |
| chr5 | 99810211  | 99810356  |
| chr5 | 99842671  | 99842796  |
| chr5 | 99853501  | 99853666  |
| chr5 | 99853691  | 99853936  |
| chr5 | 99854251  | 99854486  |
| chr5 | 99866261  | 99866366  |
| chr5 | 99910521  | 99910696  |
| chr5 | 99978741  | 99978836  |
| chr5 | 100027631 | 100027706 |
| chr5 | 100089461 | 100089546 |
| chr5 | 100100391 | 100100636 |
| chr5 | 100117841 | 100118066 |
| chr5 | 100281731 | 100281886 |
| chr5 | 100336651 | 100336776 |
| chr5 | 100575061 | 100575216 |
| chr5 | 101403381 | 101403626 |
| chr5 | 101404241 | 101404416 |

|      |           |           |
|------|-----------|-----------|
| chr5 | 101537501 | 101537626 |
| chr5 | 101563561 | 101563926 |
| chr5 | 101600421 | 101600636 |
| chr5 | 101737751 | 101737986 |
| chr5 | 101764261 | 101764436 |
| chr5 | 101783121 | 101783286 |
| chr5 | 101783661 | 101783786 |
| chr5 | 101783981 | 101784056 |
| chr5 | 101784141 | 101784326 |
| chr5 | 101819661 | 101819816 |
| chr5 | 101819861 | 101820126 |
| chr5 | 101830751 | 101830896 |
| chr5 | 101831091 | 101831356 |
| chr5 | 101981311 | 101981416 |
| chr5 | 102208531 | 102208646 |
| chr5 | 102292821 | 102292956 |
| chr5 | 102293131 | 102293316 |
| chr5 | 102295141 | 102295276 |
| chr5 | 102353581 | 102353756 |
| chr5 | 102506811 | 102506926 |
| chr5 | 102755611 | 102755826 |
| chr5 | 102755861 | 102756066 |
| chr5 | 103009121 | 103009226 |
| chr5 | 103050931 | 103051006 |
| chr5 | 103053591 | 103053826 |
| chr5 | 103053981 | 103054116 |
| chr5 | 103058081 | 103058196 |
| chr5 | 103096261 | 103096366 |
| chr5 | 103144501 | 103144716 |
| chr5 | 103576991 | 103577136 |
| chr5 | 103581001 | 103581146 |
| chr5 | 103581181 | 103581396 |
| chr5 | 103596061 | 103596156 |
| chr5 | 103597611 | 103597826 |
| chr5 | 103607611 | 103607726 |
| chr5 | 103634121 | 103634266 |
| chr5 | 103638411 | 103638526 |
| chr5 | 103652481 | 103652616 |
| chr5 | 103661931 | 103662076 |
| chr5 | 103676681 | 103676776 |
| chr5 | 103677671 | 103677786 |
| chr5 | 103705061 | 103705216 |
| chr5 | 103739871 | 103740056 |
| chr5 | 103977531 | 103977656 |
| chr5 | 104002051 | 104002146 |
| chr5 | 104002181 | 104002326 |
| chr5 | 104011691 | 104011976 |
| chr5 | 104018761 | 104018876 |
| chr5 | 104020321 | 104020516 |
| chr5 | 104048001 | 104048176 |
| chr5 | 104142431 | 104142666 |
| chr5 | 104242961 | 104243096 |
| chr5 | 104348891 | 104349086 |

|      |           |           |
|------|-----------|-----------|
| chr5 | 104350671 | 104350816 |
| chr5 | 104352271 | 104352446 |
| chr5 | 104353691 | 104353846 |
| chr5 | 104477071 | 104477226 |
| chr5 | 104477671 | 104477786 |
| chr5 | 104545111 | 104545216 |
| chr5 | 104639731 | 104639836 |
| chr5 | 104668171 | 104668276 |
| chr5 | 105702231 | 105702376 |
| chr5 | 105735581 | 105735726 |
| chr5 | 105925371 | 105925556 |
| chr5 | 105931231 | 105931366 |
| chr5 | 105946051 | 105946196 |
| chr5 | 106002581 | 106002716 |
| chr5 | 106006741 | 106006926 |
| chr5 | 106017451 | 106017656 |
| chr5 | 106031471 | 106031626 |
| chr5 | 106040631 | 106040916 |
| chr5 | 106041521 | 106041876 |
| chr5 | 106048621 | 106048786 |
| chr5 | 106100421 | 106100546 |
| chr5 | 106143111 | 106143206 |
| chr5 | 106162391 | 106162536 |
| chr5 | 106537131 | 106537406 |
| chr5 | 106555581 | 106555746 |
| chr5 | 106563191 | 106563356 |
| chr5 | 106743381 | 106743546 |
| chr5 | 106798071 | 106798346 |
| chr5 | 106846251 | 106846416 |
| chr5 | 106849521 | 106849646 |
| chr5 | 106980151 | 106980246 |
| chr5 | 107138281 | 107138386 |
| chr5 | 107307881 | 107308086 |
| chr5 | 107319531 | 107319956 |
| chr5 | 107320461 | 107320576 |
| chr5 | 107372571 | 107372696 |
| chr5 | 107406351 | 107406506 |
| chr5 | 107416671 | 107416806 |
| chr5 | 107436521 | 107436656 |
| chr5 | 107543801 | 107544036 |
| chr5 | 107738001 | 107738106 |
| chr5 | 107800891 | 107801086 |
| chr5 | 110626731 | 110626876 |
| chr5 | 110656891 | 110657036 |
| chr5 | 110726981 | 110727076 |
| chr5 | 110738381 | 110738846 |
| chr5 | 111109581 | 111109726 |
| chr5 | 111200381 | 111200516 |
| chr5 | 111251471 | 111251686 |
| chr5 | 111284021 | 111284116 |
| chr5 | 111297061 | 111297176 |
| chr5 | 111339131 | 111339246 |
| chr5 | 111339421 | 111339516 |

|      |           |           |
|------|-----------|-----------|
| chr5 | 111361311 | 111361416 |
| chr5 | 111394731 | 111395076 |
| chr5 | 111395091 | 111395296 |
| chr5 | 111404541 | 111404666 |
| chr5 | 111435841 | 111435936 |
| chr5 | 111445181 | 111445406 |
| chr5 | 111484051 | 111484236 |
| chr5 | 111633621 | 111633786 |
| chr5 | 111634461 | 111634636 |
| chr5 | 111649021 | 111649176 |
| chr5 | 111653701 | 111653806 |
| chr5 | 111746711 | 111747086 |
| chr5 | 111749321 | 111749526 |
| chr5 | 111752541 | 111752746 |
| chr5 | 111763231 | 111763386 |
| chr5 | 111769371 | 111769796 |
| chr5 | 111771701 | 111771776 |
| chr5 | 111776301 | 111776706 |
| chr5 | 111790041 | 111790146 |
| chr5 | 111790161 | 111790396 |
| chr5 | 111795521 | 111795646 |
| chr5 | 111810771 | 111810996 |
| chr5 | 111811071 | 111811546 |
| chr5 | 111821481 | 111821996 |
| chr5 | 111822011 | 111822126 |
| chr5 | 111835941 | 111836046 |
| chr5 | 111866331 | 111866586 |
| chr5 | 111880211 | 111880356 |
| chr5 | 111889501 | 111889656 |
| chr5 | 111965241 | 111965396 |
| chr5 | 111971191 | 111971316 |
| chr5 | 112030901 | 112031186 |
| chr5 | 112045991 | 112046476 |
| chr5 | 112093151 | 112093256 |
| chr5 | 112242031 | 112242176 |
| chr5 | 112242391 | 112242496 |
| chr5 | 112317321 | 112317486 |
| chr5 | 112317541 | 112317736 |
| chr5 | 112407381 | 112407496 |
| chr5 | 112511381 | 112511546 |
| chr5 | 112521411 | 112521526 |
| chr5 | 112633841 | 112634016 |
| chr5 | 112652511 | 112652606 |
| chr5 | 112699341 | 112699436 |
| chr5 | 112699661 | 112699806 |
| chr5 | 112719171 | 112719586 |
| chr5 | 112722221 | 112722636 |
| chr5 | 112761931 | 112762056 |
| chr5 | 112843931 | 112844046 |
| chr5 | 112892301 | 112892416 |
| chr5 | 112901171 | 112901476 |
| chr5 | 112901481 | 112901626 |
| chr5 | 112988521 | 112988626 |

|      |           |           |
|------|-----------|-----------|
| chr5 | 112995931 | 112996176 |
| chr5 | 113009621 | 113009946 |
| chr5 | 113010031 | 113010166 |
| chr5 | 113010651 | 113010746 |
| chr5 | 113091761 | 113091906 |
| chr5 | 113206811 | 113207066 |
| chr5 | 113268821 | 113268946 |
| chr5 | 113361661 | 113361806 |
| chr5 | 113362891 | 113363026 |
| chr5 | 113398151 | 113398256 |
| chr5 | 113457451 | 113457636 |
| chr5 | 113460221 | 113460416 |
| chr5 | 113460431 | 113460586 |
| chr5 | 113460731 | 113460986 |
| chr5 | 113467201 | 113467356 |
| chr5 | 113536231 | 113536326 |
| chr5 | 113660841 | 113660986 |
| chr5 | 113688611 | 113688706 |
| chr5 | 113688831 | 113689006 |
| chr5 | 113744521 | 113744656 |
| chr5 | 113964851 | 113964966 |
| chr5 | 114053231 | 114053456 |
| chr5 | 114058981 | 114059076 |
| chr5 | 114146041 | 114146206 |
| chr5 | 114150211 | 114150326 |
| chr5 | 114163821 | 114163956 |
| chr5 | 114166901 | 114167026 |
| chr5 | 114179721 | 114179826 |
| chr5 | 114219991 | 114220186 |
| chr5 | 114407021 | 114407276 |
| chr5 | 114452801 | 114453086 |
| chr5 | 114560461 | 114560656 |
| chr5 | 114631311 | 114631496 |
| chr5 | 114692181 | 114692326 |
| chr5 | 114735921 | 114736306 |
| chr5 | 114743601 | 114744066 |
| chr5 | 114768441 | 114768566 |
| chr5 | 114770751 | 114770886 |
| chr5 | 114814991 | 114815156 |
| chr5 | 114833941 | 114834056 |
| chr5 | 114836061 | 114836216 |
| chr5 | 114836281 | 114836396 |
| chr5 | 114839241 | 114839386 |
| chr5 | 114845411 | 114845576 |
| chr5 | 114850001 | 114850226 |
| chr5 | 114850431 | 114850636 |
| chr5 | 114851301 | 114851426 |
| chr5 | 114852241 | 114852416 |
| chr5 | 114865821 | 114865986 |
| chr5 | 115056451 | 115056856 |
| chr5 | 115057281 | 115057406 |
| chr5 | 115229251 | 115229556 |
| chr5 | 115229761 | 115229916 |

|      |           |           |
|------|-----------|-----------|
| chr5 | 115230601 | 115230756 |
| chr5 | 115413791 | 115413906 |
| chr5 | 115445661 | 115445786 |
| chr5 | 115452901 | 115452996 |
| chr5 | 115453251 | 115453476 |
| chr5 | 115464681 | 115464806 |
| chr5 | 115465801 | 115465926 |
| chr5 | 115467371 | 115467476 |
| chr5 | 115624101 | 115624356 |
| chr5 | 115634421 | 115634546 |
| chr5 | 115654601 | 115654726 |
| chr5 | 115769921 | 115770026 |
| chr5 | 115829621 | 115829946 |
| chr5 | 116168551 | 116168706 |
| chr5 | 116171631 | 116171856 |
| chr5 | 116171961 | 116172086 |
| chr5 | 116420131 | 116420286 |
| chr5 | 116470051 | 116470396 |
| chr5 | 116470431 | 116470566 |
| chr5 | 116570281 | 116570416 |
| chr5 | 116573501 | 116573756 |
| chr5 | 116696311 | 116696426 |
| chr5 | 116699091 | 116699246 |
| chr5 | 116709781 | 116710026 |
| chr5 | 116756541 | 116756816 |
| chr5 | 116842691 | 116842856 |
| chr5 | 116934001 | 116934136 |
| chr5 | 116962261 | 116962376 |
| chr5 | 117005551 | 117005686 |
| chr5 | 117147911 | 117148056 |
| chr5 | 117384491 | 117384656 |
| chr5 | 117396591 | 117396846 |
| chr5 | 117396991 | 117397286 |
| chr5 | 117398181 | 117398426 |
| chr5 | 117574611 | 117574896 |
| chr5 | 117574961 | 117575336 |
| chr5 | 117621261 | 117621456 |
| chr5 | 117779361 | 117779486 |
| chr5 | 117883361 | 117883606 |
| chr5 | 117912401 | 117912566 |
| chr5 | 117912611 | 117912876 |
| chr5 | 117920871 | 117921046 |
| chr5 | 117967731 | 117968016 |
| chr5 | 118339781 | 118339906 |
| chr5 | 118348071 | 118348346 |
| chr5 | 118464051 | 118464166 |
| chr5 | 118484221 | 118484336 |
| chr5 | 118484371 | 118484506 |
| chr5 | 118537811 | 118537976 |
| chr5 | 118593351 | 118593636 |
| chr5 | 118640301 | 118640456 |
| chr5 | 118720821 | 118720936 |
| chr5 | 118793441 | 118793516 |

|      |           |           |
|------|-----------|-----------|
| chr5 | 118817341 | 118817436 |
| chr5 | 118828951 | 118829036 |
| chr5 | 118831441 | 118831666 |
| chr5 | 118835401 | 118835486 |
| chr5 | 118927661 | 118927816 |
| chr5 | 118927931 | 118928126 |
| chr5 | 118928931 | 118929106 |
| chr5 | 118930271 | 118930396 |
| chr5 | 118931191 | 118931306 |
| chr5 | 118963781 | 118963906 |
| chr5 | 119019071 | 119019206 |
| chr5 | 119079591 | 119079726 |
| chr5 | 119090521 | 119090746 |
| chr5 | 119093591 | 119093746 |
| chr5 | 119093781 | 119094036 |
| chr5 | 119118041 | 119118526 |
| chr5 | 119138111 | 119138246 |
| chr5 | 119191161 | 119191396 |
| chr5 | 119191401 | 119191556 |
| chr5 | 119221751 | 119221906 |
| chr5 | 119233861 | 119234016 |
| chr5 | 119313231 | 119313366 |
| chr5 | 119396451 | 119396586 |
| chr5 | 119396621 | 119396776 |
| chr5 | 119398811 | 119398996 |
| chr5 | 119399031 | 119399176 |
| chr5 | 119439611 | 119439746 |
| chr5 | 119444311 | 119444446 |
| chr5 | 119454981 | 119455406 |
| chr5 | 119455411 | 119455716 |
| chr5 | 119631331 | 119631656 |
| chr5 | 119631671 | 119631886 |
| chr5 | 119634821 | 119634956 |
| chr5 | 119645791 | 119645916 |
| chr5 | 119661391 | 119661576 |
| chr5 | 119824201 | 119824286 |
| chr5 | 119848771 | 119849026 |
| chr5 | 119858871 | 119858986 |
| chr5 | 119859101 | 119859216 |
| chr5 | 119866161 | 119866366 |
| chr5 | 119869221 | 119869376 |
| chr5 | 119869541 | 119869796 |
| chr5 | 119870151 | 119870306 |
| chr5 | 119876441 | 119876666 |
| chr5 | 119886291 | 119886506 |
| chr5 | 119898951 | 119899086 |
| chr5 | 119902111 | 119902236 |
| chr5 | 119912281 | 119912496 |
| chr5 | 119924231 | 119924326 |
| chr5 | 119925171 | 119925346 |
| chr5 | 119928681 | 119928776 |
| chr5 | 119928941 | 119929136 |
| chr5 | 119941551 | 119941676 |

|      |           |           |
|------|-----------|-----------|
| chr5 | 119947841 | 119948016 |
| chr5 | 119955391 | 119955526 |
| chr5 | 119955661 | 119956056 |
| chr5 | 119978191 | 119978346 |
| chr5 | 120009091 | 120009746 |
| chr5 | 120009801 | 120010096 |
| chr5 | 120198001 | 120198076 |
| chr5 | 120219831 | 120219976 |
| chr5 | 120233721 | 120233916 |
| chr5 | 120234001 | 120234206 |
| chr5 | 120238721 | 120239136 |
| chr5 | 120343521 | 120343806 |
| chr5 | 120348071 | 120348216 |
| chr5 | 120391591 | 120391746 |
| chr5 | 120431231 | 120431326 |
| chr5 | 120486061 | 120486536 |
| chr5 | 120489711 | 120490106 |
| chr5 | 120495711 | 120495806 |
| chr5 | 120505071 | 120505236 |
| chr5 | 120505291 | 120505486 |
| chr5 | 120541071 | 120541186 |
| chr5 | 120545741 | 120546016 |
| chr5 | 120565161 | 120565276 |
| chr5 | 120654711 | 120654876 |
| chr5 | 120655101 | 120655226 |
| chr5 | 120708221 | 120708386 |
| chr5 | 120715111 | 120715376 |
| chr5 | 120715391 | 120715606 |
| chr5 | 120808901 | 120809016 |
| chr5 | 120821651 | 120821766 |
| chr5 | 120821961 | 120822086 |
| chr5 | 120825571 | 120825976 |
| chr5 | 120839061 | 120839176 |
| chr5 | 120839271 | 120839376 |
| chr5 | 120861721 | 120861856 |
| chr5 | 120895751 | 120895876 |
| chr5 | 120967201 | 120967326 |
| chr5 | 121228301 | 121228416 |
| chr5 | 121228451 | 121228606 |
| chr5 | 121449551 | 121449746 |
| chr5 | 121486991 | 121487146 |
| chr5 | 121586901 | 121587056 |
| chr5 | 121587121 | 121587246 |
| chr5 | 122096271 | 122096436 |
| chr5 | 122155371 | 122155596 |
| chr5 | 122155911 | 122156006 |
| chr5 | 122156281 | 122156466 |
| chr5 | 122161951 | 122162056 |
| chr5 | 122163451 | 122163586 |
| chr5 | 122164021 | 122164176 |
| chr5 | 122164431 | 122164556 |
| chr5 | 122170261 | 122170456 |
| chr5 | 122185121 | 122185276 |



|      |           |           |
|------|-----------|-----------|
| chr5 | 122185331 | 122185486 |
| chr5 | 122185841 | 122185996 |
| chr5 | 122186841 | 122186976 |
| chr5 | 122189041 | 122189316 |
| chr5 | 122189341 | 122189526 |
| chr5 | 122190911 | 122191066 |
| chr5 | 122191211 | 122191306 |
| chr5 | 122191371 | 122191516 |
| chr5 | 122192691 | 122192826 |
| chr5 | 122192991 | 122193206 |
| chr5 | 122195311 | 122195526 |
| chr5 | 122195581 | 122195776 |
| chr5 | 122195871 | 122196016 |
| chr5 | 122199081 | 122199266 |
| chr5 | 122209061 | 122209216 |
| chr5 | 122209431 | 122209696 |
| chr5 | 122233331 | 122233656 |
| chr5 | 122233681 | 122233756 |
| chr5 | 122234091 | 122234176 |
| chr5 | 122234291 | 122234456 |
| chr5 | 122242481 | 122242756 |
| chr5 | 122277761 | 122277836 |
| chr5 | 122323141 | 122323286 |
| chr5 | 122323301 | 122323456 |
| chr5 | 122369871 | 122370216 |
| chr5 | 122529751 | 122530086 |
| chr5 | 122534361 | 122534546 |
| chr5 | 122551861 | 122552006 |
| chr5 | 122563001 | 122563126 |
| chr5 | 122710461 | 122710796 |
| chr5 | 122770321 | 122770496 |
| chr5 | 122779101 | 122779266 |
| chr5 | 122811231 | 122811486 |
| chr5 | 122811511 | 122811736 |
| chr5 | 122827501 | 122827626 |
| chr5 | 122881991 | 122882136 |
| chr5 | 122951261 | 122951496 |
| chr5 | 122954071 | 122954316 |
| chr5 | 123016921 | 123017206 |
| chr5 | 123044771 | 123044876 |
| chr5 | 123045251 | 123045376 |
| chr5 | 123086581 | 123086726 |
| chr5 | 123257971 | 123258066 |
| chr5 | 123374841 | 123375146 |
| chr5 | 123381071 | 123381326 |
| chr5 | 123381571 | 123381736 |
| chr5 | 123560591 | 123560836 |
| chr5 | 123573731 | 123573856 |
| chr5 | 123925031 | 123925196 |
| chr5 | 123934501 | 123934626 |
| chr5 | 123935471 | 123935606 |
| chr5 | 123935921 | 123936116 |
| chr5 | 124238331 | 124238546 |

|      |           |           |
|------|-----------|-----------|
| chr5 | 124275431 | 124275626 |
| chr5 | 124305971 | 124306426 |
| chr5 | 124312561 | 124312656 |
| chr5 | 124425411 | 124425616 |
| chr5 | 124471371 | 124471626 |
| chr5 | 124471711 | 124471836 |
| chr5 | 124491211 | 124491326 |
| chr5 | 124501861 | 124502106 |
| chr5 | 124502411 | 124502596 |
| chr5 | 125179591 | 125179746 |
| chr5 | 125189421 | 125189526 |
| chr5 | 125220261 | 125220366 |
| chr5 | 125249741 | 125249836 |
| chr5 | 125356741 | 125356996 |
| chr5 | 125357421 | 125357686 |
| chr5 | 125357771 | 125357936 |
| chr5 | 125374161 | 125374326 |
| chr5 | 125436581 | 125436716 |
| chr5 | 125439901 | 125440146 |
| chr5 | 125440161 | 125440306 |
| chr5 | 125440661 | 125441046 |
| chr5 | 125441091 | 125441426 |
| chr5 | 125441501 | 125441616 |
| chr5 | 125448491 | 125448616 |
| chr5 | 125465661 | 125466016 |
| chr5 | 125506861 | 125506996 |
| chr5 | 125553621 | 125554146 |
| chr5 | 125556261 | 125556596 |
| chr5 | 125556731 | 125556906 |
| chr5 | 125690411 | 125690516 |
| chr5 | 125795691 | 125795806 |
| chr5 | 125853071 | 125853186 |
| chr5 | 127608291 | 127608476 |
| chr5 | 127608711 | 127608826 |
| chr5 | 127608921 | 127609056 |
| chr5 | 127609231 | 127609356 |
| chr5 | 127613131 | 127613256 |
| chr5 | 127613461 | 127613616 |
| chr5 | 127774071 | 127774226 |
| chr5 | 127980971 | 127981076 |
| chr5 | 128786671 | 128786776 |
| chr5 | 128797411 | 128797506 |
| chr5 | 128872901 | 128873046 |
| chr5 | 128935351 | 128935556 |
| chr5 | 129011761 | 129011876 |
| chr5 | 129208051 | 129208146 |
| chr5 | 129214861 | 129215086 |
| chr5 | 129218101 | 129218246 |
| chr5 | 129219891 | 129220116 |
| chr5 | 129252251 | 129252346 |
| chr5 | 129470861 | 129471016 |
| chr5 | 129471151 | 129471296 |
| chr5 | 129479051 | 129479196 |

|      |           |           |
|------|-----------|-----------|
| chr5 | 129498161 | 129498306 |
| chr5 | 129498331 | 129498466 |
| chr5 | 129512141 | 129512256 |
| chr5 | 129575301 | 129575486 |
| chr5 | 129581411 | 129581516 |
| chr5 | 129583271 | 129583576 |
| chr5 | 129597461 | 129597706 |
| chr5 | 129612491 | 129612616 |
| chr5 | 129658901 | 129658966 |
| chr5 | 129724771 | 129724946 |
| chr5 | 129804741 | 129804926 |
| chr5 | 131142421 | 131142576 |
| chr5 | 131223111 | 131223266 |
| chr5 | 131408531 | 131408656 |
| chr5 | 131442661 | 131442826 |
| chr5 | 131450491 | 131450626 |
| chr5 | 131548961 | 131549136 |
| chr5 | 131777001 | 131777146 |
| chr5 | 131833851 | 131834206 |
| chr5 | 131865941 | 131866166 |
| chr5 | 131866301 | 131866466 |
| chr5 | 131870231 | 131870776 |
| chr5 | 131886691 | 131886866 |
| chr5 | 131887201 | 131887376 |
| chr5 | 131909221 | 131909316 |
| chr5 | 131928221 | 131928586 |
| chr5 | 131930621 | 131930896 |
| chr5 | 131931161 | 131931386 |
| chr5 | 132002281 | 132002456 |
| chr5 | 132007281 | 132007436 |
| chr5 | 132007501 | 132007586 |
| chr5 | 132054061 | 132054246 |
| chr5 | 132054541 | 132054666 |
| chr5 | 132087411 | 132087506 |
| chr5 | 132117821 | 132118226 |
| chr5 | 132124421 | 132124586 |
| chr5 | 132136461 | 132136646 |
| chr5 | 132136771 | 132137066 |
| chr5 | 132137101 | 132137206 |
| chr5 | 132140121 | 132140436 |
| chr5 | 132189091 | 132189206 |
| chr5 | 132189251 | 132189476 |
| chr5 | 132240901 | 132241096 |
| chr5 | 132359101 | 132359276 |
| chr5 | 132359571 | 132359736 |
| chr5 | 132368811 | 132368936 |
| chr5 | 132520271 | 132520396 |
| chr5 | 132575271 | 132575376 |
| chr5 | 132575871 | 132576046 |
| chr5 | 132653401 | 132653666 |
| chr5 | 132676791 | 132676956 |
| chr5 | 132733211 | 132733336 |
| chr5 | 132751651 | 132751846 |

|      |           |           |
|------|-----------|-----------|
| chr5 | 132753001 | 132753176 |
| chr5 | 132764081 | 132764396 |
| chr5 | 132928071 | 132928156 |
| chr5 | 132928311 | 132928466 |
| chr5 | 132932431 | 132932576 |
| chr5 | 133598911 | 133599056 |
| chr5 | 133967781 | 133967876 |
| chr5 | 134031111 | 134031206 |
| chr5 | 134335551 | 134335686 |
| chr5 | 134358131 | 134358236 |
| chr5 | 134386081 | 134386246 |
| chr5 | 134460451 | 134460546 |
| chr5 | 134494641 | 134494906 |
| chr5 | 134517401 | 134517556 |
| chr5 | 134517861 | 134517996 |
| chr5 | 134519791 | 134519956 |
| chr5 | 134610821 | 134610916 |
| chr5 | 134634601 | 134634816 |
| chr5 | 134730621 | 134730716 |
| chr5 | 134751071 | 134751346 |
| chr5 | 135038821 | 135038956 |
| chr5 | 135064051 | 135064146 |
| chr5 | 135082571 | 135082916 |
| chr5 | 135236451 | 135236546 |
| chr5 | 135274031 | 135274156 |
| chr5 | 135285451 | 135285576 |
| chr5 | 135286091 | 135286196 |
| chr5 | 135403561 | 135403686 |
| chr5 | 135769791 | 135769886 |
| chr5 | 135769901 | 135770026 |
| chr5 | 135800851 | 135801056 |
| chr5 | 135812801 | 135813116 |
| chr5 | 135959031 | 135959146 |
| chr5 | 135998491 | 135998726 |
| chr5 | 136169341 | 136169416 |
| chr5 | 136252521 | 136252686 |
| chr5 | 136336291 | 136336596 |
| chr5 | 136757981 | 136758136 |
| chr5 | 136758651 | 136758776 |
| chr5 | 136807861 | 136807996 |
| chr5 | 136866541 | 136866676 |
| chr5 | 136882261 | 136882496 |
| chr5 | 137087521 | 137087646 |
| chr5 | 137198541 | 137198646 |
| chr5 | 137251251 | 137251436 |
| chr5 | 137335441 | 137335636 |
| chr5 | 137335691 | 137336046 |
| chr5 | 137685911 | 137686056 |
| chr5 | 137711701 | 137711986 |
| chr5 | 138974081 | 138974226 |
| chr5 | 139010241 | 139010336 |
| chr5 | 139010341 | 139010486 |
| chr5 | 139118531 | 139118816 |

|      |           |           |
|------|-----------|-----------|
| chr5 | 139188221 | 139188426 |
| chr5 | 139210431 | 139210596 |
| chr5 | 139231861 | 139232016 |
| chr5 | 139347121 | 139347206 |
| chr5 | 139382311 | 139382476 |
| chr5 | 139688581 | 139688716 |
| chr5 | 139872891 | 139873186 |
| chr5 | 139873231 | 139873336 |
| chr5 | 139892921 | 139893076 |
| chr5 | 139975811 | 139975966 |
| chr5 | 140045941 | 140046046 |
| chr5 | 140049561 | 140049656 |
| chr5 | 140182761 | 140182896 |
| chr5 | 140486151 | 140486306 |
| chr5 | 140636231 | 140636526 |
| chr5 | 140761831 | 140761926 |
| chr5 | 140767431 | 140767556 |
| chr5 | 140801571 | 140801746 |
| chr5 | 140802221 | 140802326 |
| chr5 | 140802441 | 140802566 |
| chr5 | 140816821 | 140816936 |
| chr5 | 140818061 | 140818206 |
| chr5 | 141105181 | 141105356 |
| chr5 | 141105441 | 141105606 |
| chr5 | 141108591 | 141108906 |
| chr5 | 141132721 | 141132846 |
| chr5 | 141362011 | 141362156 |
| chr5 | 141633161 | 141633316 |
| chr5 | 141634201 | 141634376 |
| chr5 | 141746231 | 141746356 |
| chr5 | 141757671 | 141757906 |
| chr5 | 141758271 | 141758446 |
| chr5 | 141772101 | 141772206 |
| chr5 | 141777501 | 141777686 |
| chr5 | 141973811 | 141973976 |
| chr5 | 142076941 | 142077056 |
| chr5 | 142372281 | 142372406 |
| chr5 | 142372461 | 142372676 |
| chr5 | 142380671 | 142380916 |
| chr5 | 142409951 | 142410086 |
| chr5 | 142431991 | 142432156 |
| chr5 | 142454371 | 142454556 |
| chr5 | 142491161 | 142491356 |
| chr5 | 142616581 | 142616746 |
| chr5 | 142637451 | 142637656 |
| chr5 | 142670371 | 142670716 |
| chr5 | 142708811 | 142708956 |
| chr5 | 142710061 | 142710236 |
| chr5 | 142850111 | 142850246 |
| chr5 | 142868881 | 142869096 |
| chr5 | 143063301 | 143063456 |
| chr5 | 143076061 | 143076186 |
| chr5 | 143077131 | 143077386 |

|      |           |           |
|------|-----------|-----------|
| chr5 | 143077811 | 143077896 |
| chr5 | 143239941 | 143240056 |
| chr5 | 143249571 | 143249726 |
| chr5 | 143265291 | 143265406 |
| chr5 | 143325711 | 143325796 |
| chr5 | 143910631 | 143910766 |
| chr5 | 144366081 | 144366196 |
| chr5 | 144444791 | 144444956 |
| chr5 | 144517001 | 144517106 |
| chr5 | 144566941 | 144567096 |
| chr5 | 144575281 | 144575436 |
| chr5 | 144609331 | 144609456 |
| chr5 | 144609661 | 144609906 |
| chr5 | 144624641 | 144624786 |
| chr5 | 144654351 | 144654496 |
| chr5 | 144677751 | 144677976 |
| chr5 | 144695431 | 144695566 |
| chr5 | 144904751 | 144904886 |
| chr5 | 145008891 | 145009056 |
| chr5 | 145188321 | 145188466 |
| chr5 | 145471311 | 145471436 |
| chr5 | 145476371 | 145476556 |
| chr5 | 146606711 | 146606836 |
| chr5 | 146706621 | 146706816 |
| chr5 | 146712531 | 146712786 |
| chr5 | 146716821 | 146716936 |
| chr5 | 146902411 | 146902706 |
| chr5 | 146907651 | 146907826 |
| chr5 | 146914031 | 146914156 |
| chr5 | 146921381 | 146921686 |
| chr5 | 146938141 | 146938266 |
| chr5 | 146958171 | 146958386 |
| chr5 | 146958391 | 146958506 |
| chr5 | 146986961 | 146987216 |
| chr5 | 146989561 | 146989626 |
| chr5 | 146991001 | 146991226 |
| chr5 | 146993521 | 146993706 |
| chr5 | 146997971 | 146998096 |
| chr5 | 146998141 | 146998796 |
| chr5 | 147011201 | 147011356 |
| chr5 | 147222651 | 147222776 |
| chr5 | 147222781 | 147222986 |
| chr5 | 147242711 | 147242826 |
| chr5 | 147316821 | 147316936 |
| chr5 | 147352691 | 147352816 |
| chr5 | 147352951 | 147353286 |
| chr5 | 147353541 | 147353686 |
| chr5 | 147353721 | 147353846 |
| chr5 | 147362021 | 147362146 |
| chr5 | 147433431 | 147433646 |
| chr5 | 147438961 | 147439116 |
| chr5 | 147446431 | 147446596 |
| chr5 | 147546161 | 147546336 |

|      |           |           |
|------|-----------|-----------|
| chr5 | 147572631 | 147572876 |
| chr5 | 147649291 | 147649496 |
| chr5 | 147911861 | 147912136 |
| chr5 | 147922401 | 147922496 |
| chr5 | 147968341 | 147968476 |
| chr5 | 148019041 | 148019196 |
| chr5 | 148052971 | 148053146 |
| chr5 | 148073571 | 148073726 |
| chr5 | 148075331 | 148075456 |
| chr5 | 148143341 | 148143626 |
| chr5 | 148660081 | 148660196 |
| chr5 | 148710551 | 148710646 |
| chr5 | 148764121 | 148764326 |
| chr5 | 148880951 | 148881106 |
| chr5 | 148885961 | 148886106 |
| chr5 | 148935381 | 148935496 |
| chr5 | 149110441 | 149110536 |
| chr5 | 149123221 | 149123356 |
| chr5 | 149131151 | 149131216 |
| chr5 | 149158631 | 149158736 |
| chr5 | 149244931 | 149245146 |
| chr5 | 149254041 | 149254176 |
| chr5 | 149254361 | 149254616 |
| chr5 | 149260421 | 149260676 |
| chr5 | 149305541 | 149305726 |
| chr5 | 149376571 | 149376656 |
| chr5 | 149427941 | 149428066 |
| chr5 | 149555061 | 149555216 |
| chr5 | 149568101 | 149568316 |
| chr5 | 149568511 | 149568716 |
| chr5 | 149569481 | 149569736 |
| chr5 | 149621631 | 149621806 |
| chr5 | 149645471 | 149645756 |
| chr5 | 149659961 | 149660286 |
| chr5 | 149660621 | 149660756 |
| chr5 | 149765311 | 149765416 |
| chr5 | 149778711 | 149778856 |
| chr5 | 149782491 | 149782686 |
| chr5 | 149796771 | 149796876 |
| chr5 | 149890731 | 149890876 |
| chr5 | 149915101 | 149915246 |
| chr5 | 149955941 | 149956036 |
| chr5 | 150136361 | 150136526 |
| chr5 | 150137171 | 150137336 |
| chr5 | 150177641 | 150177846 |
| chr5 | 150177941 | 150178006 |
| chr5 | 150205811 | 150206076 |
| chr5 | 150285311 | 150285496 |
| chr5 | 150287081 | 150287526 |
| chr5 | 150288501 | 150288626 |
| chr5 | 150465631 | 150465776 |
| chr5 | 150557691 | 150557866 |
| chr5 | 150562841 | 150562956 |

|      |           |           |
|------|-----------|-----------|
| chr5 | 150601531 | 150601686 |
| chr5 | 150601701 | 150601976 |
| chr5 | 150653201 | 150653446 |
| chr5 | 150678041 | 150678196 |
| chr5 | 150686731 | 150686856 |
| chr5 | 150726781 | 150726986 |
| chr5 | 151040151 | 151040456 |
| chr5 | 151040831 | 151041026 |
| chr5 | 151147631 | 151147746 |
| chr5 | 151187051 | 151187216 |
| chr5 | 151239571 | 151239716 |
| chr5 | 151245911 | 151246026 |
| chr5 | 151246081 | 151246156 |
| chr5 | 151322831 | 151322956 |
| chr5 | 151324761 | 151325006 |
| chr5 | 151376991 | 151377186 |
| chr5 | 151410711 | 151410916 |
| chr5 | 151411321 | 151411536 |
| chr5 | 151418001 | 151418356 |
| chr5 | 151448851 | 151449006 |
| chr5 | 151465421 | 151465566 |
| chr5 | 151564711 | 151564846 |
| chr5 | 151564881 | 151564956 |
| chr5 | 151568321 | 151568456 |
| chr5 | 151662721 | 151662856 |
| chr5 | 151664251 | 151664346 |
| chr4 | 4561941   | 4562096   |
| chr4 | 5651661   | 5651806   |
| chr4 | 6288301   | 6288416   |
| chr4 | 6409921   | 6410026   |
| chr4 | 6645361   | 6645456   |
| chr4 | 6914461   | 6914576   |
| chr4 | 7382331   | 7382596   |
| chr4 | 7508751   | 7508876   |
| chr4 | 8308641   | 8308986   |
| chr4 | 8351111   | 8351256   |
| chr4 | 8503951   | 8504086   |
| chr4 | 8504751   | 8504846   |
| chr4 | 8594351   | 8594706   |
| chr4 | 8623561   | 8623656   |
| chr4 | 8678031   | 8678336   |
| chr4 | 8726811   | 8726906   |
| chr4 | 8738341   | 8738486   |
| chr4 | 8777641   | 8777796   |
| chr4 | 8779061   | 8779256   |
| chr4 | 8783731   | 8783896   |
| chr4 | 8847441   | 8847566   |
| chr4 | 8915071   | 8915186   |
| chr4 | 8933161   | 8933426   |
| chr4 | 8938291   | 8938536   |
| chr4 | 8954691   | 8954846   |
| chr4 | 8958231   | 8958326   |
| chr4 | 8975451   | 8975586   |



|      |          |          |
|------|----------|----------|
| chr4 | 8987411  | 8987576  |
| chr4 | 9021671  | 9021896  |
| chr4 | 9031261  | 9031336  |
| chr4 | 9031461  | 9031586  |
| chr4 | 9043081  | 9043316  |
| chr4 | 9045441  | 9045656  |
| chr4 | 9050901  | 9051086  |
| chr4 | 9088821  | 9089076  |
| chr4 | 9245701  | 9245846  |
| chr4 | 9264671  | 9265086  |
| chr4 | 9569881  | 9570056  |
| chr4 | 9758571  | 9758756  |
| chr4 | 10880371 | 10880526 |
| chr4 | 10900131 | 10900396 |
| chr4 | 10922731 | 10922886 |
| chr4 | 10933051 | 10933186 |
| chr4 | 11119871 | 11120006 |
| chr4 | 11455861 | 11455996 |
| chr4 | 11456401 | 11456516 |
| chr4 | 11491351 | 11491536 |
| chr4 | 11841861 | 11841996 |
| chr4 | 12169991 | 12170136 |
| chr4 | 12190371 | 12190606 |
| chr4 | 12585951 | 12586046 |
| chr4 | 12955471 | 12955636 |
| chr4 | 13020901 | 13020986 |
| chr4 | 13033081 | 13033246 |
| chr4 | 13326331 | 13326596 |
| chr4 | 13335551 | 13335736 |
| chr4 | 13513881 | 13514026 |
| chr4 | 13520411 | 13520556 |
| chr4 | 13527631 | 13527756 |
| chr4 | 13683091 | 13683206 |
| chr4 | 13708581 | 13708716 |
| chr4 | 13708821 | 13709046 |
| chr4 | 13710541 | 13710736 |
| chr4 | 13712031 | 13712216 |
| chr4 | 13713121 | 13713276 |
| chr4 | 13717441 | 13717596 |
| chr4 | 13720191 | 13720336 |
| chr4 | 13726641 | 13726766 |
| chr4 | 13746031 | 13746166 |
| chr4 | 13764591 | 13764786 |
| chr4 | 13764871 | 13765076 |
| chr4 | 14473931 | 14474046 |
| chr4 | 14784491 | 14784696 |
| chr4 | 20373731 | 20373856 |
| chr4 | 21895921 | 21896056 |
| chr4 | 21969741 | 21969916 |
| chr4 | 22202041 | 22202176 |
| chr4 | 22243281 | 22243446 |
| chr4 | 22926781 | 22927056 |
| chr4 | 23049671 | 23049806 |

|      |          |          |
|------|----------|----------|
| chr4 | 23090031 | 23090336 |
| chr4 | 23823401 | 23823536 |
| chr4 | 23844861 | 23844966 |
| chr4 | 24868211 | 24868326 |
| chr4 | 27595871 | 27595996 |
| chr4 | 28078621 | 28078776 |
| chr4 | 28468791 | 28469306 |
| chr4 | 28619871 | 28619986 |
| chr4 | 28993751 | 28993826 |
| chr4 | 29044881 | 29045066 |
| chr4 | 29057621 | 29057796 |
| chr4 | 29088381 | 29088566 |
| chr4 | 29261801 | 29261946 |
| chr4 | 29287581 | 29287766 |
| chr4 | 31474431 | 31474566 |
| chr4 | 31593891 | 31594176 |
| chr4 | 31945701 | 31945816 |
| chr4 | 32071061 | 32071166 |
| chr4 | 32158881 | 32159226 |
| chr4 | 32163301 | 32163486 |
| chr4 | 32202051 | 32202196 |
| chr4 | 32205731 | 32205946 |
| chr4 | 32207291 | 32207486 |
| chr4 | 32251871 | 32251976 |
| chr4 | 32252941 | 32253126 |
| chr4 | 32265451 | 32265586 |
| chr4 | 32370481 | 32370706 |
| chr4 | 32403261 | 32403416 |
| chr4 | 32403711 | 32403886 |
| chr4 | 32517871 | 32517966 |
| chr4 | 32562741 | 32562896 |
| chr4 | 32569741 | 32570016 |
| chr4 | 32572051 | 32572216 |
| chr4 | 32575571 | 32575766 |
| chr4 | 32579371 | 32579516 |
| chr4 | 32633281 | 32633416 |
| chr4 | 32634021 | 32634156 |
| chr4 | 32641121 | 32641306 |
| chr4 | 32655151 | 32655526 |
| chr4 | 32666201 | 32666596 |
| chr4 | 32678691 | 32678786 |
| chr4 | 32679861 | 32680266 |
| chr4 | 32697151 | 32697286 |
| chr4 | 32757481 | 32757636 |
| chr4 | 32761081 | 32761236 |
| chr4 | 32849551 | 32849686 |
| chr4 | 32859241 | 32859336 |
| chr4 | 32859551 | 32859686 |
| chr4 | 32860121 | 32860316 |
| chr4 | 32862551 | 32862646 |
| chr4 | 32888931 | 32889076 |
| chr4 | 32893131 | 32893306 |
| chr4 | 33192241 | 33192536 |

|      |          |          |
|------|----------|----------|
| chr4 | 33192721 | 33192866 |
| chr4 | 33213291 | 33213406 |
| chr4 | 33244651 | 33244846 |
| chr4 | 33265721 | 33265846 |
| chr4 | 33280281 | 33280436 |
| chr4 | 33280891 | 33281016 |
| chr4 | 33281211 | 33281406 |
| chr4 | 33281521 | 33281656 |
| chr4 | 33515451 | 33515636 |
| chr4 | 33536801 | 33536976 |
| chr4 | 33550601 | 33550736 |
| chr4 | 33756391 | 33756496 |
| chr4 | 33757761 | 33757906 |
| chr4 | 33839231 | 33839456 |
| chr4 | 33917981 | 33918156 |
| chr4 | 34092421 | 34092546 |
| chr4 | 34221191 | 34221366 |
| chr4 | 34406791 | 34407006 |
| chr4 | 34443041 | 34443206 |
| chr4 | 34770931 | 34771066 |
| chr4 | 34805001 | 34805166 |
| chr4 | 35106401 | 35106626 |
| chr4 | 35195801 | 35195906 |
| chr4 | 35201761 | 35201926 |
| chr4 | 35238471 | 35238596 |
| chr4 | 35241311 | 35241426 |
| chr4 | 35310221 | 35310346 |
| chr4 | 35315721 | 35315826 |
| chr4 | 35320961 | 35321136 |
| chr4 | 35594641 | 35594766 |
| chr4 | 36224081 | 36224166 |
| chr4 | 36477571 | 36477766 |
| chr4 | 36477871 | 36478056 |
| chr4 | 40239761 | 40239886 |
| chr4 | 40376981 | 40377126 |
| chr4 | 40410771 | 40410936 |
| chr4 | 40427451 | 40427626 |
| chr4 | 40428181 | 40428466 |
| chr4 | 40428511 | 40428666 |
| chr4 | 40814531 | 40814726 |
| chr4 | 40860581 | 40860696 |
| chr4 | 40860701 | 40860776 |
| chr4 | 41007261 | 41007356 |
| chr4 | 41011971 | 41012096 |
| chr4 | 41243911 | 41244076 |
| chr4 | 41509781 | 41509916 |
| chr4 | 41683351 | 41683456 |
| chr4 | 41716701 | 41716856 |
| chr4 | 41744311 | 41744446 |
| chr4 | 41762731 | 41762836 |
| chr4 | 41763661 | 41763756 |
| chr4 | 41764681 | 41765126 |
| chr4 | 41778451 | 41778566 |

|      |          |          |
|------|----------|----------|
| chr4 | 41851431 | 41851646 |
| chr4 | 41852601 | 41852806 |
| chr4 | 41896621 | 41896866 |
| chr4 | 41896941 | 41897076 |
| chr4 | 41915511 | 41915926 |
| chr4 | 43062111 | 43062256 |
| chr4 | 43331041 | 43331106 |
| chr4 | 43415891 | 43416016 |
| chr4 | 43420041 | 43420416 |
| chr4 | 43438781 | 43438916 |
| chr4 | 43441081 | 43441276 |
| chr4 | 43532391 | 43532556 |
| chr4 | 43532871 | 43533006 |
| chr4 | 43579191 | 43579296 |
| chr4 | 43905461 | 43905586 |
| chr4 | 43920461 | 43920586 |
| chr4 | 44092701 | 44092806 |
| chr4 | 44208511 | 44208716 |
| chr4 | 44529151 | 44529266 |
| chr4 | 44529651 | 44530046 |
| chr4 | 44582341 | 44582486 |
| chr4 | 44612671 | 44612806 |
| chr4 | 44612861 | 44613076 |
| chr4 | 44643991 | 44644096 |
| chr4 | 44654961 | 44655166 |
| chr4 | 44655331 | 44655546 |
| chr4 | 44663011 | 44663126 |
| chr4 | 44663391 | 44663616 |
| chr4 | 44846711 | 44846836 |
| chr4 | 44855361 | 44855456 |
| chr4 | 44901471 | 44901586 |
| chr4 | 45228731 | 45228836 |
| chr4 | 45275331 | 45275426 |
| chr4 | 45415421 | 45415586 |
| chr4 | 45426461 | 45426606 |
| chr4 | 45457431 | 45457546 |
| chr4 | 45460441 | 45460586 |
| chr4 | 45488311 | 45488426 |
| chr4 | 45512981 | 45513096 |
| chr4 | 45514561 | 45514706 |
| chr4 | 45515191 | 45515486 |
| chr4 | 45519931 | 45520146 |
| chr4 | 45520811 | 45521156 |
| chr4 | 45543521 | 45543666 |
| chr4 | 45594371 | 45594626 |
| chr4 | 45598271 | 45598586 |
| chr4 | 45661821 | 45661976 |
| chr4 | 45748591 | 45748806 |
| chr4 | 45779531 | 45779686 |
| chr4 | 45789121 | 45789286 |
| chr4 | 45840701 | 45840846 |
| chr4 | 46063821 | 46064056 |
| chr4 | 46122311 | 46122576 |

|      |          |          |
|------|----------|----------|
| chr4 | 46206551 | 46206796 |
| chr4 | 46523821 | 46523976 |
| chr4 | 46524061 | 46524246 |
| chr4 | 46524741 | 46525116 |
| chr4 | 47445551 | 47445696 |
| chr4 | 47456931 | 47457116 |
| chr4 | 47471201 | 47471506 |
| chr4 | 47679231 | 47679326 |
| chr4 | 48077541 | 48077796 |
| chr4 | 48424421 | 48424526 |
| chr4 | 48746781 | 48746936 |
| chr4 | 48800801 | 48800956 |
| chr4 | 49011491 | 49011616 |
| chr4 | 49085801 | 49085916 |
| chr4 | 49099961 | 49100076 |
| chr4 | 49337731 | 49337876 |
| chr4 | 49414151 | 49414276 |
| chr4 | 52127211 | 52127356 |
| chr4 | 52449691 | 52449776 |
| chr4 | 52450711 | 52450936 |
| chr4 | 52619391 | 52619496 |
| chr4 | 53212841 | 53212956 |
| chr4 | 53248881 | 53249046 |
| chr4 | 53249101 | 53249166 |
| chr4 | 53365761 | 53365896 |
| chr4 | 53463531 | 53463626 |
| chr4 | 53472781 | 53473046 |
| chr4 | 53474321 | 53474436 |
| chr4 | 53507341 | 53507466 |
| chr4 | 53587491 | 53587616 |
| chr4 | 53616541 | 53616806 |
| chr4 | 53921661 | 53921856 |
| chr4 | 54042821 | 54042966 |
| chr4 | 54050301 | 54050446 |
| chr4 | 54053491 | 54053626 |
| chr4 | 54328401 | 54328626 |
| chr4 | 54392811 | 54392996 |
| chr4 | 54395551 | 54395706 |
| chr4 | 54408741 | 54409016 |
| chr4 | 54622751 | 54622916 |
| chr4 | 54622931 | 54623066 |
| chr4 | 54623121 | 54623256 |
| chr4 | 54978521 | 54978656 |
| chr4 | 54987421 | 54987526 |
| chr4 | 54990971 | 54991086 |
| chr4 | 54994571 | 54994726 |
| chr4 | 55026601 | 55026786 |
| chr4 | 55026901 | 55027156 |
| chr4 | 55087601 | 55087876 |
| chr4 | 55098711 | 55098786 |
| chr4 | 55099591 | 55099686 |
| chr4 | 55103271 | 55103456 |
| chr4 | 55139191 | 55139346 |

|      |          |          |
|------|----------|----------|
| chr4 | 55143131 | 55143326 |
| chr4 | 55167811 | 55167926 |
| chr4 | 55315391 | 55315506 |
| chr4 | 55315541 | 55315696 |
| chr4 | 55537411 | 55537546 |
| chr4 | 55604801 | 55604936 |
| chr4 | 55732641 | 55732766 |
| chr4 | 55733011 | 55733156 |
| chr4 | 56733221 | 56733466 |
| chr4 | 56796411 | 56796656 |
| chr4 | 57235381 | 57235526 |
| chr4 | 57280411 | 57280536 |
| chr4 | 57298221 | 57298346 |
| chr4 | 57317421 | 57317566 |
| chr4 | 57343221 | 57343656 |
| chr4 | 57348741 | 57349096 |
| chr4 | 57352871 | 57353076 |
| chr4 | 57399811 | 57400086 |
| chr4 | 57429431 | 57429706 |
| chr4 | 57700361 | 57700486 |
| chr4 | 57772101 | 57772456 |
| chr4 | 57916081 | 57916216 |
| chr4 | 57925571 | 57925776 |
| chr4 | 58016551 | 58016726 |
| chr4 | 58128781 | 58128956 |
| chr4 | 58279071 | 58279186 |
| chr4 | 58300881 | 58301046 |
| chr4 | 58366551 | 58366886 |
| chr4 | 58547031 | 58547206 |
| chr4 | 58612711 | 58612846 |
| chr4 | 58615241 | 58615396 |
| chr4 | 58628131 | 58628746 |
| chr4 | 58640331 | 58640546 |
| chr4 | 58640621 | 58640806 |
| chr4 | 58642151 | 58642256 |
| chr4 | 58764671 | 58764846 |
| chr4 | 58764871 | 58765006 |
| chr4 | 58765901 | 58766006 |
| chr4 | 59075561 | 59075926 |
| chr4 | 59333431 | 59333716 |
| chr4 | 59409611 | 59409976 |
| chr4 | 59417401 | 59417506 |
| chr4 | 59468911 | 59469036 |
| chr4 | 59478841 | 59479046 |
| chr4 | 59481891 | 59481986 |
| chr4 | 59482411 | 59482626 |
| chr4 | 59729881 | 59730016 |
| chr4 | 59769121 | 59769326 |
| chr4 | 59778001 | 59778086 |
| chr4 | 59866101 | 59866306 |
| chr4 | 59908311 | 59908396 |
| chr4 | 59932821 | 59932986 |
| chr4 | 59967451 | 59967626 |

|      |          |          |
|------|----------|----------|
| chr4 | 61734431 | 61734556 |
| chr4 | 61761541 | 61761776 |
| chr4 | 61994831 | 61994956 |
| chr4 | 62099731 | 62099826 |
| chr4 | 62145601 | 62146036 |
| chr4 | 62149731 | 62149866 |
| chr4 | 62152651 | 62152756 |
| chr4 | 62229141 | 62229276 |
| chr4 | 62310081 | 62310236 |
| chr4 | 62356881 | 62356986 |
| chr4 | 62464851 | 62465016 |
| chr4 | 62465031 | 62465236 |
| chr4 | 62521091 | 62521386 |
| chr4 | 62522121 | 62522276 |
| chr4 | 62522381 | 62522536 |
| chr4 | 62538571 | 62538706 |
| chr4 | 62543091 | 62543226 |
| chr4 | 62543471 | 62543656 |
| chr4 | 62545331 | 62545576 |
| chr4 | 62735341 | 62735486 |
| chr4 | 62906741 | 62906866 |
| chr4 | 62912801 | 62913036 |
| chr4 | 62953031 | 62953196 |
| chr4 | 62953521 | 62953636 |
| chr4 | 62953801 | 62954126 |
| chr4 | 62954141 | 62954246 |
| chr4 | 62954401 | 62954506 |
| chr4 | 62969711 | 62969856 |
| chr4 | 62970211 | 62970386 |
| chr4 | 62979801 | 62979926 |
| chr4 | 62986551 | 62986856 |
| chr4 | 62986871 | 62986946 |
| chr4 | 63030491 | 63030636 |
| chr4 | 63213181 | 63213406 |
| chr4 | 64703221 | 64703326 |
| chr4 | 64728831 | 64728986 |
| chr4 | 64764851 | 64765036 |
| chr4 | 64765151 | 64765306 |
| chr4 | 64783411 | 64783816 |
| chr4 | 65545481 | 65545626 |
| chr4 | 65662261 | 65662606 |
| chr4 | 65965341 | 65965466 |
| chr4 | 66315111 | 66315256 |
| chr4 | 66674611 | 66674736 |
| chr4 | 67806181 | 67806316 |
| chr4 | 69267661 | 69267816 |
| chr4 | 69308701 | 69308846 |
| chr4 | 69378451 | 69378576 |
| chr4 | 69466971 | 69467096 |
| chr4 | 69513251 | 69513516 |
| chr4 | 69866041 | 69866186 |
| chr4 | 69866671 | 69866806 |
| chr4 | 69893341 | 69893446 |

|      |          |          |
|------|----------|----------|
| chr4 | 70971841 | 70971936 |
| chr4 | 71535971 | 71536176 |
| chr4 | 71646501 | 71646876 |
| chr4 | 71683851 | 71684046 |
| chr4 | 73756691 | 73756896 |
| chr4 | 75033731 | 75033886 |
| chr4 | 75235911 | 75236066 |
| chr4 | 75331431 | 75331576 |
| chr4 | 75467181 | 75467296 |
| chr4 | 75484881 | 75484996 |
| chr4 | 75718061 | 75718226 |
| chr4 | 75743861 | 75744016 |
| chr4 | 75886571 | 75886706 |
| chr4 | 75914791 | 75914876 |
| chr4 | 80649031 | 80649146 |
| chr4 | 80781221 | 80781356 |
| chr4 | 81088521 | 81088706 |
| chr4 | 81214431 | 81214576 |
| chr4 | 81215391 | 81215546 |
| chr4 | 81216041 | 81216466 |
| chr4 | 81879841 | 81880156 |
| chr4 | 82080581 | 82080726 |
| chr4 | 82085221 | 82085426 |
| chr4 | 82088901 | 82089066 |
| chr4 | 82092751 | 82092886 |
| chr4 | 82163341 | 82163506 |
| chr4 | 82234651 | 82234966 |
| chr4 | 82385981 | 82386096 |
| chr4 | 82387791 | 82387916 |
| chr4 | 82454671 | 82454766 |
| chr4 | 82492531 | 82492636 |
| chr4 | 82516561 | 82516766 |
| chr4 | 82522301 | 82522626 |
| chr4 | 82551711 | 82551826 |
| chr4 | 82617081 | 82617226 |
| chr4 | 82755771 | 82755946 |
| chr4 | 82785311 | 82785526 |
| chr4 | 82993551 | 82993666 |
| chr4 | 83052551 | 83052666 |
| chr4 | 83126721 | 83126946 |
| chr4 | 83127811 | 83127926 |
| chr4 | 83128091 | 83128196 |
| chr4 | 83165491 | 83165616 |
| chr4 | 83214191 | 83214326 |
| chr4 | 83272951 | 83273096 |
| chr4 | 83397651 | 83397906 |
| chr4 | 83415241 | 83415486 |
| chr4 | 83447481 | 83447696 |
| chr4 | 83461811 | 83462036 |
| chr4 | 83581281 | 83581426 |
| chr4 | 83581621 | 83581806 |
| chr4 | 83598181 | 83598256 |
| chr4 | 83623521 | 83623666 |



|      |          |          |
|------|----------|----------|
| chr4 | 83757861 | 83758106 |
| chr4 | 83779641 | 83779746 |
| chr4 | 83789391 | 83789656 |
| chr4 | 83821111 | 83821216 |
| chr4 | 83827781 | 83827996 |
| chr4 | 84000771 | 84000916 |
| chr4 | 84105931 | 84106096 |
| chr4 | 84109001 | 84109096 |
| chr4 | 84113971 | 84114126 |
| chr4 | 84143541 | 84143706 |
| chr4 | 85497461 | 85497596 |
| chr4 | 85501691 | 85501836 |
| chr4 | 85501851 | 85501936 |
| chr4 | 85502411 | 85502716 |
| chr4 | 85642151 | 85642276 |
| chr4 | 85721041 | 85721116 |
| chr4 | 86143091 | 86143196 |
| chr4 | 86370561 | 86370706 |
| chr4 | 86857571 | 86857816 |
| chr4 | 86872721 | 86872806 |
| chr4 | 86922371 | 86922486 |
| chr4 | 87042011 | 87042126 |
| chr4 | 87305391 | 87305486 |
| chr4 | 87437151 | 87437336 |
| chr4 | 87484151 | 87484276 |
| chr4 | 87489111 | 87489276 |
| chr4 | 88008571 | 88008696 |
| chr4 | 88383601 | 88383736 |
| chr4 | 88841921 | 88842056 |
| chr4 | 88962061 | 88962196 |
| chr4 | 89000861 | 89000976 |
| chr4 | 89433411 | 89433566 |
| chr4 | 90574791 | 90574936 |
| chr4 | 90731251 | 90731346 |
| chr4 | 90866121 | 90866256 |
| chr4 | 91087871 | 91087996 |
| chr4 | 91553241 | 91553306 |
| chr4 | 91614981 | 91615076 |
| chr4 | 93853311 | 93853446 |
| chr4 | 93858321 | 93858476 |
| chr4 | 93863271 | 93863426 |
| chr4 | 93863491 | 93863656 |
| chr4 | 94084321 | 94084446 |
| chr4 | 94347371 | 94347486 |
| chr4 | 94609901 | 94610066 |
| chr4 | 94625951 | 94626096 |
| chr4 | 94770831 | 94771056 |
| chr4 | 94877671 | 94877846 |
| chr4 | 94926821 | 94927016 |
| chr4 | 94936741 | 94936836 |
| chr4 | 95225681 | 95225966 |
| chr4 | 95233001 | 95233146 |
| chr4 | 95235131 | 95235316 |

|      |           |           |
|------|-----------|-----------|
| chr4 | 95251161  | 95251346  |
| chr4 | 95311201  | 95311336  |
| chr4 | 95322711  | 95322856  |
| chr4 | 95353231  | 95353356  |
| chr4 | 95383661  | 95383786  |
| chr4 | 95388541  | 95388646  |
| chr4 | 95873921  | 95874056  |
| chr4 | 96978431  | 96978626  |
| chr4 | 97167921  | 97168056  |
| chr4 | 97332421  | 97332516  |
| chr4 | 97431731  | 97431896  |
| chr4 | 97586441  | 97586776  |
| chr4 | 97600661  | 97600906  |
| chr4 | 97658541  | 97658666  |
| chr4 | 97683701  | 97683836  |
| chr4 | 97932151  | 97932296  |
| chr4 | 98060991  | 98061286  |
| chr4 | 98180131  | 98180376  |
| chr4 | 98180651  | 98180866  |
| chr4 | 98185781  | 98186016  |
| chr4 | 98277121  | 98277326  |
| chr4 | 98348591  | 98348726  |
| chr4 | 98349081  | 98349206  |
| chr4 | 98699411  | 98699506  |
| chr4 | 98865911  | 98866046  |
| chr4 | 98868971  | 98869086  |
| chr4 | 98869241  | 98869346  |
| chr4 | 98877391  | 98877646  |
| chr4 | 98951501  | 98951716  |
| chr4 | 98951751  | 98951876  |
| chr4 | 98995451  | 98995626  |
| chr4 | 98995701  | 98995916  |
| chr4 | 99047501  | 99047626  |
| chr4 | 99066151  | 99066526  |
| chr4 | 99067101  | 99067306  |
| chr4 | 99467431  | 99467546  |
| chr4 | 99669401  | 99669556  |
| chr4 | 99706161  | 99706286  |
| chr4 | 99721291  | 99721436  |
| chr4 | 99745891  | 99745986  |
| chr4 | 99746031  | 99746146  |
| chr4 | 99784151  | 99784306  |
| chr4 | 99819931  | 99820136  |
| chr4 | 99847271  | 99847436  |
| chr4 | 99907651  | 99907826  |
| chr4 | 100017061 | 100017266 |
| chr4 | 100024071 | 100024186 |
| chr4 | 100287851 | 100287946 |
| chr4 | 100299431 | 100299526 |
| chr4 | 100326861 | 100327096 |
| chr4 | 100335311 | 100335466 |
| chr4 | 100377441 | 100377576 |
| chr4 | 100384141 | 100384696 |

|      |           |           |
|------|-----------|-----------|
| chr4 | 100388381 | 100388506 |
| chr4 | 100408001 | 100408116 |
| chr4 | 100408721 | 100408856 |
| chr4 | 100471911 | 100472056 |
| chr4 | 100580541 | 100580666 |
| chr4 | 100580711 | 100580796 |
| chr4 | 100750941 | 100751076 |
| chr4 | 100787451 | 100787566 |
| chr4 | 101082601 | 101082806 |
| chr4 | 101082911 | 101083096 |
| chr4 | 102009551 | 102009786 |
| chr4 | 102063871 | 102064066 |
| chr4 | 102089341 | 102089436 |
| chr4 | 102091651 | 102091796 |
| chr4 | 102360831 | 102361016 |
| chr4 | 102361191 | 102361306 |
| chr4 | 102472411 | 102472536 |
| chr4 | 102473601 | 102473696 |
| chr4 | 102474681 | 102474866 |
| chr4 | 102476001 | 102476096 |
| chr4 | 102476351 | 102476456 |
| chr4 | 102491431 | 102491606 |
| chr4 | 102503261 | 102503436 |
| chr4 | 102505121 | 102505236 |
| chr4 | 102537171 | 102537316 |
| chr4 | 102761871 | 102762116 |
| chr4 | 102823051 | 102823376 |
| chr4 | 102827411 | 102827536 |
| chr4 | 103162371 | 103162536 |
| chr4 | 103467901 | 103468196 |
| chr4 | 103537581 | 103537886 |
| chr4 | 103587301 | 103587406 |
| chr4 | 103881951 | 103882086 |
| chr4 | 103882771 | 103882916 |
| chr4 | 104103281 | 104103386 |
| chr4 | 104104891 | 104105086 |
| chr4 | 104208361 | 104208456 |
| chr4 | 104211401 | 104211636 |
| chr4 | 104211661 | 104211766 |
| chr4 | 104308921 | 104309216 |
| chr4 | 104560671 | 104561026 |
| chr4 | 104591201 | 104591346 |
| chr4 | 104652041 | 104652146 |
| chr4 | 104699001 | 104699266 |
| chr4 | 104699281 | 104699466 |
| chr4 | 104738151 | 104738296 |
| chr4 | 104773731 | 104774046 |
| chr4 | 104774171 | 104774436 |
| chr4 | 104779951 | 104780246 |
| chr4 | 104821261 | 104821376 |
| chr4 | 104845931 | 104846136 |
| chr4 | 104904731 | 104904926 |
| chr4 | 104905181 | 104905306 |

|      |           |           |
|------|-----------|-----------|
| chr4 | 105040571 | 105040696 |
| chr4 | 105130631 | 105130766 |
| chr4 | 105141091 | 105141236 |
| chr4 | 105414281 | 105414456 |
| chr4 | 105517431 | 105517556 |
| chr4 | 105518351 | 105518486 |
| chr4 | 105698321 | 105698446 |
| chr4 | 105733571 | 105733686 |
| chr4 | 105879071 | 105879296 |
| chr4 | 106043801 | 106043996 |
| chr4 | 106356401 | 106356546 |
| chr4 | 106398541 | 106398696 |
| chr4 | 106398731 | 106398946 |
| chr4 | 106427951 | 106428126 |
| chr4 | 106454531 | 106454646 |
| chr4 | 106474071 | 106474336 |
| chr4 | 106476291 | 106476606 |
| chr4 | 106484201 | 106484466 |
| chr4 | 106513931 | 106514326 |
| chr4 | 106606231 | 106606676 |
| chr4 | 106783761 | 106783906 |
| chr4 | 106936391 | 106936636 |
| chr4 | 106941381 | 106941526 |
| chr4 | 106966281 | 106966466 |
| chr4 | 107000271 | 107000396 |
| chr4 | 107021751 | 107021906 |
| chr4 | 107036201 | 107036296 |
| chr4 | 107042241 | 107042336 |
| chr4 | 107148611 | 107148726 |
| chr4 | 107186191 | 107186516 |
| chr4 | 107254131 | 107254416 |
| chr4 | 107280611 | 107280746 |
| chr4 | 107280791 | 107280896 |
| chr4 | 107332891 | 107333076 |
| chr4 | 107333191 | 107333356 |
| chr4 | 107333391 | 107333586 |
| chr4 | 107846591 | 107846716 |
| chr4 | 107848681 | 107849026 |
| chr4 | 107852441 | 107852546 |
| chr4 | 107862021 | 107862226 |
| chr4 | 107905761 | 107905886 |
| chr4 | 107945921 | 107946016 |
| chr4 | 108398371 | 108398556 |
| chr4 | 108585581 | 108585846 |
| chr4 | 109458291 | 109458476 |
| chr4 | 109516901 | 109517026 |
| chr4 | 109549951 | 109550086 |
| chr4 | 109618891 | 109619036 |
| chr4 | 109784881 | 109785006 |
| chr4 | 109787811 | 109787976 |
| chr4 | 109788051 | 109788366 |
| chr4 | 109808421 | 109808626 |
| chr4 | 110642881 | 110643016 |

|      |           |           |
|------|-----------|-----------|
| chr4 | 110917261 | 110917376 |
| chr4 | 110941261 | 110941416 |
| chr4 | 113837831 | 113838086 |
| chr4 | 113990181 | 113990356 |
| chr4 | 113994841 | 113995086 |
| chr4 | 113998181 | 113998286 |
| chr4 | 113998441 | 113998506 |
| chr4 | 114014111 | 114014246 |
| chr4 | 114048791 | 114048936 |
| chr4 | 114049381 | 114049496 |
| chr4 | 114058761 | 114058916 |
| chr4 | 114081581 | 114081726 |
| chr4 | 114141781 | 114141926 |
| chr4 | 114148881 | 114149006 |
| chr4 | 114186191 | 114186756 |
| chr4 | 114186881 | 114186976 |
| chr4 | 114210321 | 114210506 |
| chr4 | 114237411 | 114237586 |
| chr4 | 114278321 | 114278466 |
| chr4 | 114368031 | 114368456 |
| chr4 | 114427281 | 114427476 |
| chr4 | 114585101 | 114585216 |
| chr4 | 115361851 | 115362036 |
| chr4 | 115402381 | 115402676 |
| chr4 | 115663801 | 115663956 |
| chr4 | 115903911 | 115904016 |
| chr4 | 115962681 | 115962826 |
| chr4 | 116312801 | 116313076 |
| chr4 | 116537931 | 116538056 |
| chr4 | 116628881 | 116629096 |
| chr4 | 116634021 | 116634266 |
| chr4 | 116636801 | 116636916 |
| chr4 | 116770451 | 116770646 |
| chr4 | 116776631 | 116776756 |
| chr4 | 116779141 | 116779396 |
| chr4 | 116809711 | 116809826 |
| chr4 | 116810461 | 116810566 |
| chr4 | 116810631 | 116810806 |
| chr4 | 116813031 | 116813156 |
| chr4 | 116814891 | 116815516 |
| chr4 | 116815741 | 116816286 |
| chr4 | 116819931 | 116820376 |
| chr4 | 116820911 | 116821036 |
| chr4 | 116858861 | 116858966 |
| chr4 | 116904561 | 116904696 |
| chr4 | 116925561 | 116925966 |
| chr4 | 116979111 | 116979286 |
| chr4 | 117034471 | 117034566 |
| chr4 | 117054331 | 117054616 |
| chr4 | 117079671 | 117079876 |
| chr4 | 117099531 | 117099736 |
| chr4 | 117103691 | 117103946 |
| chr4 | 117109481 | 117109606 |

|      |           |           |
|------|-----------|-----------|
| chr4 | 117135181 | 117135416 |
| chr4 | 117149751 | 117149936 |
| chr4 | 117153291 | 117153446 |
| chr4 | 117153461 | 117153766 |
| chr4 | 117156731 | 117157096 |
| chr4 | 117441511 | 117441626 |
| chr4 | 117515061 | 117515236 |
| chr4 | 117595341 | 117595436 |
| chr4 | 117596101 | 117596316 |
| chr4 | 117620881 | 117621146 |
| chr4 | 117747291 | 117747446 |
| chr4 | 117772481 | 117772586 |
| chr4 | 117772671 | 117772786 |
| chr4 | 117779761 | 117779886 |
| chr4 | 117796001 | 117796136 |
| chr4 | 117963991 | 117964156 |
| chr4 | 118241911 | 118242016 |
| chr4 | 118270781 | 118270876 |
| chr4 | 118506881 | 118507036 |
| chr4 | 118526271 | 118526416 |
| chr4 | 118526951 | 118527056 |
| chr4 | 118720671 | 118720806 |
| chr4 | 119215481 | 119215546 |
| chr4 | 119314331 | 119314486 |
| chr4 | 119430421 | 119430656 |
| chr4 | 119430811 | 119430986 |
| chr4 | 119556991 | 119557096 |
| chr4 | 119668041 | 119668236 |
| chr4 | 119697071 | 119697296 |
| chr4 | 119771401 | 119771686 |
| chr4 | 119771761 | 119771876 |
| chr4 | 119930331 | 119930476 |
| chr4 | 120377341 | 120377436 |
| chr4 | 120383341 | 120383476 |
| chr4 | 120383551 | 120383806 |
| chr4 | 120539151 | 120539316 |
| chr4 | 122949181 | 122949356 |
| chr4 | 123101381 | 123101596 |
| chr4 | 123404291 | 123404596 |
| chr4 | 123493121 | 123493536 |
| chr4 | 123493711 | 123493846 |
| chr4 | 123505071 | 123505216 |
| chr4 | 123508791 | 123508906 |
| chr4 | 123522231 | 123522356 |
| chr4 | 123536221 | 123536406 |
| chr4 | 123538791 | 123538936 |
| chr4 | 123540761 | 123540966 |
| chr4 | 123550561 | 123551116 |
| chr4 | 123601581 | 123601746 |
| chr4 | 123602961 | 123603106 |
| chr4 | 123691691 | 123691916 |
| chr4 | 123692071 | 123692216 |
| chr4 | 123698981 | 123699476 |

|      |           |           |
|------|-----------|-----------|
| chr4 | 123759451 | 123759636 |
| chr4 | 123812951 | 123813116 |
| chr4 | 123967971 | 123968086 |
| chr4 | 123974711 | 123975016 |
| chr4 | 123980211 | 123980316 |
| chr4 | 123980371 | 123980716 |
| chr4 | 123980761 | 123980896 |
| chr4 | 123985101 | 123985486 |
| chr4 | 124009101 | 124009316 |
| chr4 | 124117741 | 124117916 |
| chr4 | 124118081 | 124118226 |
| chr4 | 124128771 | 124128916 |
| chr4 | 124133871 | 124134026 |
| chr4 | 124169151 | 124169276 |
| chr4 | 124314021 | 124314196 |
| chr4 | 124481831 | 124482076 |
| chr4 | 124613521 | 124613706 |
| chr4 | 124677051 | 124677276 |
| chr4 | 124688571 | 124688686 |
| chr4 | 124697041 | 124697196 |
| chr4 | 124697211 | 124697366 |
| chr4 | 124720131 | 124720256 |
| chr4 | 124785301 | 124785386 |
| chr4 | 124785431 | 124785546 |
| chr4 | 124953161 | 124953236 |
| chr4 | 124981381 | 124981526 |
| chr4 | 124987881 | 124988036 |
| chr4 | 124988251 | 124988356 |
| chr4 | 124996791 | 124996946 |
| chr4 | 125047241 | 125047406 |
| chr4 | 125047671 | 125047766 |
| chr4 | 125068901 | 125069106 |
| chr4 | 125075591 | 125075776 |
| chr4 | 125090041 | 125090136 |
| chr4 | 125103071 | 125103286 |
| chr4 | 125138581 | 125138756 |
| chr4 | 125153911 | 125154026 |
| chr4 | 125220661 | 125221006 |
| chr4 | 125230881 | 125231066 |
| chr4 | 125282321 | 125282466 |
| chr4 | 125283341 | 125283446 |
| chr4 | 125312081 | 125312336 |
| chr4 | 125358651 | 125358886 |
| chr4 | 125413511 | 125413806 |
| chr4 | 125413861 | 125414416 |
| chr4 | 125424861 | 125425046 |
| chr4 | 125425731 | 125425896 |
| chr4 | 125431571 | 125431696 |
| chr4 | 125432991 | 125433426 |
| chr4 | 125434481 | 125434666 |
| chr4 | 125461751 | 125461866 |
| chr4 | 125461951 | 125462156 |
| chr4 | 125476421 | 125476726 |

|      |           |           |
|------|-----------|-----------|
| chr4 | 125487271 | 125487646 |
| chr4 | 125491501 | 125491666 |
| chr4 | 125508901 | 125509086 |
| chr4 | 125658311 | 125658416 |
| chr4 | 125730671 | 125730746 |
| chr4 | 125804101 | 125804226 |
| chr4 | 126176331 | 126176556 |
| chr4 | 126507851 | 126507986 |
| chr4 | 126729551 | 126730146 |
| chr4 | 126771851 | 126772026 |
| chr4 | 126794641 | 126794846 |
| chr4 | 126831321 | 126831426 |
| chr4 | 126892041 | 126892366 |
| chr4 | 126921551 | 126922036 |
| chr4 | 126922081 | 126922246 |
| chr4 | 126943231 | 126943376 |
| chr4 | 126983201 | 126983356 |
| chr4 | 127150411 | 127150586 |
| chr4 | 127178241 | 127178466 |
| chr4 | 127198431 | 127198576 |
| chr4 | 127534911 | 127534996 |
| chr4 | 127575051 | 127575166 |
| chr4 | 127620301 | 127620466 |
| chr4 | 127726901 | 127726996 |
| chr4 | 127727011 | 127727076 |
| chr4 | 127730291 | 127730396 |
| chr4 | 128144201 | 128144596 |
| chr4 | 128149171 | 128149336 |
| chr4 | 128180961 | 128181106 |
| chr4 | 128191071 | 128191206 |
| chr4 | 128219211 | 128219346 |
| chr4 | 128222581 | 128222716 |
| chr4 | 128223871 | 128223996 |
| chr4 | 128229251 | 128229366 |
| chr4 | 128235711 | 128235856 |
| chr4 | 128301431 | 128301696 |
| chr4 | 128400421 | 128400576 |
| chr4 | 128400701 | 128400806 |
| chr4 | 128514201 | 128514316 |
| chr4 | 128555681 | 128555886 |
| chr4 | 128614681 | 128614826 |
| chr4 | 128617191 | 128617266 |
| chr4 | 128617351 | 128617556 |
| chr4 | 128908751 | 128908866 |
| chr4 | 129204791 | 129204926 |
| chr4 | 129470561 | 129470656 |
| chr4 | 129483951 | 129484086 |
| chr4 | 129484141 | 129484286 |
| chr4 | 129599221 | 129599376 |
| chr4 | 129603701 | 129603966 |
| chr4 | 129604931 | 129605066 |
| chr4 | 129940251 | 129940436 |
| chr4 | 130021781 | 130021916 |



|      |           |           |
|------|-----------|-----------|
| chr4 | 130144511 | 130144636 |
| chr4 | 130148261 | 130148496 |
| chr4 | 130159561 | 130159746 |
| chr4 | 130279461 | 130279696 |
| chr4 | 130426011 | 130426136 |
| chr4 | 130463581 | 130463766 |
| chr4 | 130466021 | 130466176 |
| chr4 | 130466211 | 130466386 |
| chr4 | 130466431 | 130466626 |
| chr4 | 130663161 | 130663286 |
| chr4 | 130704701 | 130704866 |
| chr4 | 130704891 | 130704996 |
| chr4 | 130756391 | 130756506 |
| chr4 | 130976901 | 130977116 |
| chr4 | 131096641 | 131096876 |
| chr4 | 131187161 | 131187486 |
| chr4 | 131190781 | 131190976 |
| chr4 | 131222031 | 131222126 |
| chr4 | 131254811 | 131254946 |
| chr4 | 131297791 | 131297916 |
| chr4 | 131302581 | 131302656 |
| chr4 | 131310211 | 131310606 |
| chr4 | 131335111 | 131335266 |
| chr4 | 131335371 | 131335576 |
| chr4 | 131356511 | 131356646 |
| chr4 | 131369971 | 131370106 |
| chr4 | 131438721 | 131438906 |
| chr4 | 131448591 | 131448906 |
| chr4 | 131453841 | 131454016 |
| chr4 | 131700171 | 131700586 |
| chr4 | 131709981 | 131710366 |
| chr4 | 131790351 | 131790506 |
| chr4 | 131919481 | 131919616 |
| chr4 | 132066411 | 132066626 |
| chr4 | 132297821 | 132298046 |
| chr4 | 132313871 | 132313996 |
| chr4 | 132314221 | 132314336 |
| chr4 | 132319241 | 132319506 |
| chr4 | 132320061 | 132320186 |
| chr4 | 132388311 | 132388456 |
| chr4 | 132448521 | 132448766 |
| chr4 | 132457551 | 132457836 |
| chr4 | 132470731 | 132470906 |
| chr4 | 132515761 | 132515926 |
| chr4 | 132651281 | 132651466 |
| chr4 | 132680221 | 132680386 |
| chr4 | 132753681 | 132753896 |
| chr4 | 132758031 | 132758256 |
| chr4 | 132829541 | 132830006 |
| chr4 | 132876961 | 132877116 |
| chr4 | 132898291 | 132898476 |
| chr4 | 132942531 | 132942696 |
| chr4 | 133101251 | 133101416 |

|      |           |           |
|------|-----------|-----------|
| chr4 | 133283241 | 133283346 |
| chr4 | 133283621 | 133283786 |
| chr4 | 133298811 | 133298966 |
| chr4 | 133321121 | 133321266 |
| chr4 | 133905911 | 133906066 |
| chr4 | 133931851 | 133932496 |
| chr4 | 133932531 | 133932606 |
| chr4 | 133932681 | 133932966 |
| chr4 | 133933061 | 133933186 |
| chr4 | 133943741 | 133943866 |
| chr4 | 133947821 | 133948046 |
| chr4 | 133954971 | 133955196 |
| chr4 | 133956011 | 133956176 |
| chr4 | 133972251 | 133972606 |
| chr4 | 134211991 | 134212106 |
| chr4 | 134218661 | 134218816 |
| chr4 | 134262031 | 134262176 |
| chr4 | 134262231 | 134262346 |
| chr4 | 134281851 | 134281946 |
| chr4 | 134476811 | 134476926 |
| chr4 | 134559291 | 134559426 |
| chr4 | 134564581 | 134564966 |
| chr4 | 134585561 | 134585696 |
| chr4 | 134607871 | 134608116 |
| chr4 | 134658121 | 134658226 |
| chr4 | 134709681 | 134709796 |
| chr4 | 134757041 | 134757366 |
| chr4 | 134765821 | 134765936 |
| chr4 | 134787021 | 134787126 |
| chr4 | 134839781 | 134839886 |
| chr4 | 134880221 | 134880316 |
| chr4 | 135016191 | 135016346 |
| chr4 | 135016891 | 135016986 |
| chr4 | 135392261 | 135392436 |
| chr4 | 135491071 | 135491216 |
| chr4 | 135528001 | 135528096 |
| chr4 | 135674051 | 135674206 |
| chr4 | 135674591 | 135674806 |
| chr4 | 135674821 | 135674956 |
| chr4 | 135723741 | 135723816 |
| chr4 | 135724021 | 135724336 |
| chr4 | 135725001 | 135725116 |
| chr4 | 136048481 | 136048776 |
| chr4 | 136056181 | 136056376 |
| chr4 | 136070021 | 136070276 |
| chr4 | 136089981 | 136090116 |
| chr4 | 136129121 | 136129306 |
| chr4 | 136170181 | 136170516 |
| chr4 | 136234031 | 136234196 |
| chr4 | 136309691 | 136309846 |
| chr4 | 136332471 | 136332636 |
| chr4 | 136393781 | 136393906 |
| chr4 | 136394011 | 136394136 |

|      |           |           |
|------|-----------|-----------|
| chr4 | 136400311 | 136400666 |
| chr4 | 136403021 | 136403176 |
| chr4 | 136405931 | 136406046 |
| chr4 | 136408071 | 136408176 |
| chr4 | 136414561 | 136414836 |
| chr4 | 136578411 | 136578556 |
| chr4 | 136732841 | 136732986 |
| chr4 | 136742591 | 136742706 |
| chr4 | 136752611 | 136752746 |
| chr4 | 136752781 | 136753056 |
| chr4 | 136753681 | 136753766 |
| chr4 | 136753891 | 136754056 |
| chr4 | 136754091 | 136754216 |
| chr4 | 136754391 | 136754516 |
| chr4 | 136756081 | 136756286 |
| chr4 | 136757571 | 136757936 |
| chr4 | 136758741 | 136758896 |
| chr4 | 136760121 | 136760306 |
| chr4 | 136911311 | 136911456 |
| chr4 | 137054241 | 137054346 |
| chr4 | 137056061 | 137056206 |
| chr4 | 137060721 | 137060886 |
| chr4 | 137079411 | 137079566 |
| chr4 | 137202771 | 137202936 |
| chr4 | 137202951 | 137203456 |
| chr4 | 137343651 | 137343806 |
| chr4 | 137410041 | 137410146 |
| chr4 | 137734831 | 137735086 |
| chr4 | 137782131 | 137782396 |
| chr4 | 137796011 | 137796156 |
| chr4 | 137846791 | 137846986 |
| chr4 | 137868911 | 137869196 |
| chr4 | 137881241 | 137881356 |
| chr4 | 137884541 | 137884706 |
| chr4 | 137886301 | 137886836 |
| chr4 | 137887421 | 137887606 |
| chr4 | 137954561 | 137954676 |
| chr4 | 137965731 | 137965886 |
| chr4 | 137996041 | 137996256 |
| chr4 | 137996261 | 137996486 |
| chr4 | 138049931 | 138050046 |
| chr4 | 138077571 | 138077706 |
| chr4 | 138240851 | 138241086 |
| chr4 | 138415141 | 138415256 |
| chr4 | 138503391 | 138503486 |
| chr4 | 138513931 | 138514056 |
| chr4 | 138555221 | 138555386 |
| chr4 | 138658931 | 138659206 |
| chr4 | 138659431 | 138659616 |
| chr4 | 138659811 | 138659916 |
| chr4 | 138807201 | 138807356 |
| chr4 | 138883671 | 138883856 |
| chr4 | 138911811 | 138912396 |

|      |           |           |
|------|-----------|-----------|
| chr4 | 138969561 | 138969686 |
| chr4 | 139039311 | 139039546 |
| chr4 | 139039601 | 139039696 |
| chr4 | 139063611 | 139063706 |
| chr4 | 139076051 | 139076236 |
| chr4 | 139081371 | 139081576 |
| chr4 | 139081591 | 139081736 |
| chr4 | 139116221 | 139116356 |
| chr4 | 139125231 | 139125376 |
| chr4 | 139148301 | 139148396 |
| chr4 | 139164891 | 139164986 |
| chr4 | 139239781 | 139240006 |
| chr4 | 139246711 | 139246956 |
| chr4 | 139251051 | 139251246 |
| chr4 | 139269671 | 139269866 |
| chr4 | 139353101 | 139353346 |
| chr4 | 139356481 | 139356616 |
| chr4 | 139445111 | 139445206 |
| chr4 | 139446231 | 139446356 |
| chr4 | 139486501 | 139486816 |
| chr4 | 139496161 | 139496306 |
| chr4 | 139500281 | 139500706 |
| chr4 | 139506861 | 139507086 |
| chr4 | 139507251 | 139507416 |
| chr4 | 139629061 | 139629236 |
| chr4 | 139639481 | 139639576 |
| chr4 | 139706931 | 139707096 |
| chr4 | 139707101 | 139707276 |
| chr4 | 139769231 | 139769376 |
| chr4 | 139770071 | 139770256 |
| chr4 | 139808341 | 139808586 |
| chr4 | 139865271 | 139865386 |
| chr4 | 140025571 | 140025796 |
| chr4 | 140052071 | 140052486 |
| chr4 | 140052541 | 140052636 |
| chr4 | 140245611 | 140245776 |
| chr4 | 140245901 | 140246056 |
| chr4 | 140403851 | 140404016 |
| chr4 | 140404211 | 140404286 |
| chr4 | 140407331 | 140407456 |
| chr4 | 140431451 | 140431586 |
| chr4 | 140551551 | 140551686 |
| chr4 | 140553411 | 140553536 |
| chr4 | 140559941 | 140560176 |
| chr4 | 140565051 | 140565206 |
| chr4 | 140565251 | 140565606 |
| chr4 | 140568781 | 140568936 |
| chr4 | 140578421 | 140578626 |
| chr4 | 140582491 | 140582656 |
| chr4 | 140610241 | 140610606 |
| chr4 | 140643991 | 140644126 |
| chr4 | 140651761 | 140651926 |
| chr4 | 140692141 | 140692256 |

|      |           |           |
|------|-----------|-----------|
| chr4 | 140775331 | 140775476 |
| chr4 | 140786321 | 140786686 |
| chr4 | 140814141 | 140814236 |
| chr4 | 140842171 | 140842396 |
| chr4 | 140843531 | 140843706 |
| chr4 | 140940191 | 140940316 |
| chr4 | 140956091 | 140956206 |
| chr4 | 141137681 | 141137816 |
| chr4 | 141214501 | 141214716 |
| chr4 | 141214781 | 141214846 |
| chr4 | 141271971 | 141272076 |
| chr4 | 141315521 | 141315676 |
| chr4 | 141324621 | 141324726 |
| chr4 | 141446411 | 141446666 |
| chr4 | 141588681 | 141588836 |
| chr4 | 141612471 | 141612646 |
| chr4 | 141620581 | 141620696 |
| chr4 | 141650761 | 141650896 |
| chr4 | 141885831 | 141886036 |
| chr4 | 142039731 | 142040006 |
| chr4 | 142040621 | 142040766 |
| chr4 | 142043491 | 142043636 |
| chr4 | 142251121 | 142251296 |
| chr4 | 142311951 | 142312086 |
| chr4 | 142312201 | 142312326 |
| chr4 | 142358731 | 142358896 |
| chr4 | 142459731 | 142459866 |
| chr4 | 142486031 | 142486196 |
| chr4 | 142486221 | 142486376 |
| chr4 | 142504991 | 142505126 |
| chr4 | 142529541 | 142529696 |
| chr4 | 142546451 | 142546616 |
| chr4 | 142591881 | 142592006 |
| chr4 | 144171861 | 144172006 |
| chr4 | 144172131 | 144172356 |
| chr4 | 144207861 | 144208216 |
| chr4 | 144266611 | 144267106 |
| chr4 | 144301421 | 144301616 |
| chr4 | 144317501 | 144317596 |
| chr4 | 144599211 | 144599396 |
| chr4 | 146350771 | 146350886 |
| chr4 | 146910451 | 146910576 |
| chr4 | 146951761 | 146951956 |
| chr4 | 146970161 | 146970356 |
| chr4 | 147064461 | 147064586 |
| chr4 | 147080481 | 147080876 |
| chr4 | 147150431 | 147150546 |
| chr4 | 147157701 | 147157856 |
| chr4 | 147158431 | 147158596 |
| chr4 | 147233621 | 147233786 |
| chr4 | 147241731 | 147241826 |
| chr4 | 147290441 | 147290566 |
| chr4 | 147348431 | 147348586 |

|      |           |           |
|------|-----------|-----------|
| chr4 | 147367271 | 147367416 |
| chr4 | 147367561 | 147367656 |
| chr4 | 147428681 | 147428836 |
| chr4 | 147494841 | 147495136 |
| chr4 | 147500521 | 147500756 |
| chr4 | 147504101 | 147504206 |
| chr4 | 147520791 | 147521096 |
| chr4 | 147556451 | 147556596 |
| chr4 | 147557331 | 147557476 |
| chr4 | 147565651 | 147565786 |
| chr4 | 147589671 | 147589826 |
| chr4 | 147653681 | 147653846 |
| chr4 | 147654051 | 147654166 |
| chr4 | 147654681 | 147654976 |
| chr4 | 147660381 | 147660556 |
| chr4 | 147661141 | 147661306 |
| chr4 | 147688871 | 147688956 |
| chr4 | 147704121 | 147704236 |
| chr4 | 147715681 | 147715836 |
| chr4 | 147722591 | 147722736 |
| chr4 | 147734191 | 147734336 |
| chr4 | 147738481 | 147738606 |
| chr4 | 147752371 | 147752536 |
| chr4 | 147765261 | 147765436 |
| chr4 | 147765471 | 147765786 |
| chr4 | 147765851 | 147766386 |
| chr4 | 147767141 | 147767306 |
| chr4 | 147769821 | 147770226 |
| chr4 | 147784461 | 147784766 |
| chr4 | 147811251 | 147811466 |
| chr4 | 147880441 | 147880676 |
| chr4 | 147883471 | 147883736 |
| chr4 | 147893171 | 147893366 |
| chr4 | 147893951 | 147894076 |
| chr4 | 147906661 | 147906836 |
| chr4 | 147913411 | 147913636 |
| chr4 | 147969111 | 147969326 |
| chr4 | 147972191 | 147972336 |
| chr4 | 148020911 | 148021026 |
| chr4 | 148064001 | 148064106 |
| chr4 | 148064441 | 148064646 |
| chr4 | 148098991 | 148099206 |
| chr4 | 148099481 | 148099676 |
| chr4 | 148126061 | 148126276 |
| chr4 | 148127741 | 148127896 |
| chr4 | 148228851 | 148229016 |
| chr4 | 148236581 | 148236756 |
| chr4 | 148237331 | 148237516 |
| chr4 | 148245121 | 148245266 |
| chr4 | 148245471 | 148245656 |
| chr4 | 148247261 | 148247446 |
| chr4 | 148249561 | 148249776 |
| chr4 | 148264361 | 148264596 |

|      |           |           |
|------|-----------|-----------|
| chr4 | 148406441 | 148406546 |
| chr4 | 148418261 | 148418406 |
| chr4 | 148485401 | 148485656 |
| chr4 | 148523281 | 148523386 |
| chr4 | 148596281 | 148596406 |
| chr4 | 148619911 | 148620086 |
| chr4 | 148624661 | 148624836 |
| chr4 | 148640751 | 148640866 |
| chr4 | 148646091 | 148646246 |
| chr4 | 148721741 | 148721876 |
| chr4 | 148730691 | 148731136 |
| chr4 | 148733761 | 148733906 |
| chr4 | 148737481 | 148737636 |
| chr4 | 148737681 | 148737806 |
| chr4 | 148750741 | 148750916 |
| chr4 | 148751131 | 148751226 |
| chr4 | 148764621 | 148764736 |
| chr4 | 148788251 | 148788396 |
| chr4 | 148789081 | 148789306 |
| chr4 | 148789721 | 148789866 |
| chr4 | 148833051 | 148833206 |
| chr4 | 148912341 | 148912456 |
| chr4 | 148920161 | 148920226 |
| chr4 | 149104081 | 149104256 |
| chr4 | 149110571 | 149110726 |
| chr4 | 149113901 | 149114026 |
| chr4 | 149116621 | 149116756 |
| chr4 | 149217671 | 149217846 |
| chr4 | 149218561 | 149218696 |
| chr4 | 149240671 | 149240836 |
| chr4 | 149259351 | 149259486 |
| chr4 | 149269251 | 149269436 |
| chr4 | 149270591 | 149270756 |
| chr4 | 149290511 | 149290606 |
| chr4 | 149305321 | 149305486 |
| chr4 | 149316601 | 149316706 |
| chr4 | 149332041 | 149332256 |
| chr4 | 149435281 | 149435366 |
| chr4 | 149505601 | 149505826 |
| chr4 | 149505861 | 149505966 |
| chr4 | 149592201 | 149592366 |
| chr4 | 149602561 | 149602686 |
| chr4 | 149626661 | 149626816 |
| chr4 | 149642651 | 149642806 |
| chr4 | 149667451 | 149667746 |
| chr4 | 149984391 | 149984676 |
| chr4 | 149991401 | 149991676 |
| chr4 | 150014641 | 150014836 |
| chr4 | 150070431 | 150070536 |
| chr4 | 150088841 | 150088936 |
| chr4 | 150199481 | 150199706 |
| chr4 | 150199821 | 150199896 |
| chr4 | 150237971 | 150238126 |

|      |           |           |
|------|-----------|-----------|
| chr4 | 150282461 | 150282666 |
| chr4 | 150307881 | 150307976 |
| chr4 | 150430041 | 150430146 |
| chr4 | 150562851 | 150562996 |
| chr4 | 150563011 | 150563126 |
| chr4 | 150586321 | 150586446 |
| chr4 | 150875611 | 150875716 |
| chr4 | 151136591 | 151136806 |
| chr4 | 151282871 | 151282966 |
| chr4 | 151392611 | 151392716 |
| chr4 | 151444431 | 151444646 |
| chr4 | 151517921 | 151518096 |
| chr4 | 151535641 | 151535846 |
| chr4 | 151677591 | 151677756 |
| chr4 | 151715961 | 151716106 |
| chr4 | 151760311 | 151760556 |
| chr4 | 151760791 | 151760946 |
| chr4 | 152044651 | 152044776 |
| chr4 | 152045031 | 152045246 |
| chr4 | 152051601 | 152051776 |
| chr4 | 152072011 | 152072116 |
| chr4 | 152091581 | 152091716 |
| chr4 | 152091721 | 152091866 |
| chr4 | 152162941 | 152163066 |
| chr4 | 152205061 | 152205166 |
| chr4 | 152258681 | 152258826 |
| chr4 | 152404751 | 152404856 |
| chr4 | 152478111 | 152478206 |
| chr4 | 152571161 | 152571276 |
| chr4 | 152650221 | 152650366 |
| chr4 | 152650451 | 152650616 |
| chr4 | 152694161 | 152694256 |
| chr4 | 152962561 | 152962706 |
| chr4 | 153190491 | 153190886 |
| chr4 | 153285071 | 153285196 |
| chr4 | 153298191 | 153298316 |
| chr4 | 153308571 | 153308716 |
| chr4 | 153315211 | 153315656 |
| chr4 | 153315851 | 153316016 |
| chr4 | 153316551 | 153316706 |
| chr4 | 153317011 | 153317146 |
| chr4 | 153317671 | 153318016 |
| chr4 | 153337011 | 153337096 |
| chr4 | 153342931 | 153343236 |
| chr4 | 153343651 | 153343886 |
| chr4 | 153347231 | 153347386 |
| chr4 | 153350651 | 153350916 |
| chr4 | 153350931 | 153351046 |
| chr4 | 153358081 | 153358216 |
| chr4 | 153360261 | 153360356 |
| chr4 | 153360481 | 153360636 |
| chr4 | 153360811 | 153360976 |
| chr4 | 153367721 | 153367946 |



|      |           |           |
|------|-----------|-----------|
| chr4 | 153372131 | 153372256 |
| chr4 | 153372311 | 153372476 |
| chr4 | 153383471 | 153383566 |
| chr4 | 153387741 | 153388076 |
| chr4 | 153412521 | 153412636 |
| chr4 | 153412821 | 153412946 |
| chr4 | 153414241 | 153414526 |
| chr4 | 153414921 | 153415066 |
| chr4 | 153438481 | 153438616 |
| chr4 | 153438661 | 153438976 |
| chr4 | 153443871 | 153444126 |
| chr4 | 153447771 | 153447946 |
| chr4 | 153625361 | 153625526 |
| chr4 | 153671921 | 153672026 |
| chr4 | 153772181 | 153772286 |
| chr4 | 153800501 | 153800756 |
| chr4 | 153969121 | 153969246 |
| chr4 | 154014881 | 154015086 |
| chr4 | 154033341 | 154033466 |
| chr4 | 154034171 | 154034476 |
| chr4 | 154061551 | 154061706 |
| chr4 | 154064201 | 154064356 |
| chr4 | 154077771 | 154077986 |
| chr4 | 154168371 | 154168526 |
| chr4 | 154779691 | 154779866 |
| chr3 | 3493501   | 3493646   |
| chr3 | 5332381   | 5332546   |
| chr3 | 5435861   | 5435966   |
| chr3 | 5509731   | 5509846   |
| chr3 | 7348761   | 7348986   |
| chr3 | 8652641   | 8652756   |
| chr3 | 8681451   | 8681986   |
| chr3 | 8719271   | 8719476   |
| chr3 | 8848481   | 8848666   |
| chr3 | 8848821   | 8848926   |
| chr3 | 8849211   | 8849326   |
| chr3 | 8850191   | 8850326   |
| chr3 | 8931981   | 8932116   |
| chr3 | 8964801   | 8964986   |
| chr3 | 9010891   | 9011146   |
| chr3 | 9011291   | 9011386   |
| chr3 | 9016811   | 9017366   |
| chr3 | 9093931   | 9094086   |
| chr3 | 9337841   | 9338066   |
| chr3 | 9341261   | 9341626   |
| chr3 | 9480711   | 9481016   |
| chr3 | 9496851   | 9496986   |
| chr3 | 9497081   | 9497186   |
| chr3 | 9503641   | 9503766   |
| chr3 | 9505291   | 9505506   |
| chr3 | 9506711   | 9506826   |
| chr3 | 9509201   | 9509526   |
| chr3 | 9527981   | 9528076   |

|      |          |          |
|------|----------|----------|
| chr3 | 9536121  | 9536236  |
| chr3 | 9649131  | 9649276  |
| chr3 | 9735291  | 9735416  |
| chr3 | 9740261  | 9740536  |
| chr3 | 9813821  | 9814046  |
| chr3 | 10075321 | 10075436 |
| chr3 | 10140481 | 10140576 |
| chr3 | 10193231 | 10193356 |
| chr3 | 10259931 | 10260086 |
| chr3 | 10285341 | 10285436 |
| chr3 | 10364121 | 10364246 |
| chr3 | 10425661 | 10425776 |
| chr3 | 10758921 | 10759056 |
| chr3 | 13928861 | 13929006 |
| chr3 | 14558141 | 14558346 |
| chr3 | 16371511 | 16371636 |
| chr3 | 17039531 | 17039656 |
| chr3 | 17054261 | 17054406 |
| chr3 | 17977821 | 17977956 |
| chr3 | 18244061 | 18244186 |
| chr3 | 18378721 | 18378816 |
| chr3 | 19199321 | 19199426 |
| chr3 | 19481061 | 19481256 |
| chr3 | 19498191 | 19498306 |
| chr3 | 19759251 | 19759476 |
| chr3 | 20149081 | 20149286 |
| chr3 | 20270701 | 20270786 |
| chr3 | 20470731 | 20470866 |
| chr3 | 21684661 | 21684806 |
| chr3 | 22129411 | 22129586 |
| chr3 | 22153721 | 22153786 |
| chr3 | 22215461 | 22215686 |
| chr3 | 22291511 | 22291646 |
| chr3 | 22493351 | 22493486 |
| chr3 | 23858831 | 23858956 |
| chr3 | 26832541 | 26832716 |
| chr3 | 27128051 | 27128306 |
| chr3 | 27216591 | 27216656 |
| chr3 | 27720341 | 27720456 |
| chr3 | 27814161 | 27814386 |
| chr3 | 27829911 | 27830076 |
| chr3 | 27847961 | 27848106 |
| chr3 | 27854611 | 27854736 |
| chr3 | 27915411 | 27915666 |
| chr3 | 27915671 | 27915796 |
| chr3 | 27919361 | 27919546 |
| chr3 | 27970241 | 27970386 |
| chr3 | 27971071 | 27971246 |
| chr3 | 28050221 | 28050436 |
| chr3 | 28050471 | 28050616 |
| chr3 | 28077741 | 28078066 |
| chr3 | 28079791 | 28079926 |
| chr3 | 28375721 | 28375806 |

|      |          |          |
|------|----------|----------|
| chr3 | 28739281 | 28739526 |
| chr3 | 28782411 | 28782576 |
| chr3 | 28782611 | 28782706 |
| chr3 | 28873171 | 28873266 |
| chr3 | 28886941 | 28887086 |
| chr3 | 28889971 | 28890146 |
| chr3 | 28912921 | 28913106 |
| chr3 | 28952501 | 28952626 |
| chr3 | 29231101 | 29231256 |
| chr3 | 29325771 | 29326116 |
| chr3 | 29424981 | 29425106 |
| chr3 | 29426831 | 29426916 |
| chr3 | 29427851 | 29427976 |
| chr3 | 29558101 | 29558226 |
| chr3 | 29899931 | 29900066 |
| chr3 | 30195901 | 30196056 |
| chr3 | 30196241 | 30196366 |
| chr3 | 30209331 | 30209696 |
| chr3 | 30257281 | 30257476 |
| chr3 | 30296021 | 30296136 |
| chr3 | 30297421 | 30297546 |
| chr3 | 30383571 | 30383796 |
| chr3 | 30396641 | 30396746 |
| chr3 | 30409971 | 30410136 |
| chr3 | 30418081 | 30418196 |
| chr3 | 30419061 | 30419226 |
| chr3 | 30445251 | 30445376 |
| chr3 | 30445381 | 30445536 |
| chr3 | 30492171 | 30492266 |
| chr3 | 30495371 | 30495506 |
| chr3 | 30505181 | 30505356 |
| chr3 | 30512931 | 30513136 |
| chr3 | 30514501 | 30514606 |
| chr3 | 30540691 | 30540826 |
| chr3 | 30570881 | 30571036 |
| chr3 | 30611331 | 30611516 |
| chr3 | 30644811 | 30645106 |
| chr3 | 30672631 | 30672756 |
| chr3 | 30672991 | 30673106 |
| chr3 | 30737281 | 30737596 |
| chr3 | 30979571 | 30979746 |
| chr3 | 31188411 | 31188566 |
| chr3 | 31214131 | 31214306 |
| chr3 | 31229781 | 31229896 |
| chr3 | 31269091 | 31269236 |
| chr3 | 31284061 | 31284206 |
| chr3 | 31289061 | 31289166 |
| chr3 | 31382281 | 31382436 |
| chr3 | 31382441 | 31382566 |
| chr3 | 31382581 | 31382686 |
| chr3 | 31399511 | 31399616 |
| chr3 | 31399931 | 31400236 |
| chr3 | 31403711 | 31403876 |

|      |          |          |
|------|----------|----------|
| chr3 | 31451521 | 31451656 |
| chr3 | 31519431 | 31519606 |
| chr3 | 32073721 | 32073836 |
| chr3 | 32808581 | 32808716 |
| chr3 | 33169391 | 33169526 |
| chr3 | 33591061 | 33591266 |
| chr3 | 34079031 | 34079336 |
| chr3 | 34096521 | 34096646 |
| chr3 | 34096761 | 34096916 |
| chr3 | 34096981 | 34097236 |
| chr3 | 34226191 | 34226346 |
| chr3 | 34233661 | 34233806 |
| chr3 | 34307411 | 34307586 |
| chr3 | 34404201 | 34404316 |
| chr3 | 34522641 | 34522866 |
| chr3 | 34523161 | 34523386 |
| chr3 | 34673381 | 34673776 |
| chr3 | 34677621 | 34677786 |
| chr3 | 34788971 | 34789356 |
| chr3 | 34848421 | 34848886 |
| chr3 | 34852731 | 34852906 |
| chr3 | 34853001 | 34853206 |
| chr3 | 34864291 | 34864436 |
| chr3 | 34870411 | 34870626 |
| chr3 | 34939191 | 34939386 |
| chr3 | 34945201 | 34945386 |
| chr3 | 34995941 | 34996096 |
| chr3 | 35001221 | 35001456 |
| chr3 | 35004721 | 35004856 |
| chr3 | 35005201 | 35005356 |
| chr3 | 35060701 | 35060966 |
| chr3 | 35080181 | 35080326 |
| chr3 | 35104471 | 35104616 |
| chr3 | 35114921 | 35115036 |
| chr3 | 35143191 | 35143336 |
| chr3 | 35143491 | 35143586 |
| chr3 | 35150771 | 35150946 |
| chr3 | 35196071 | 35196226 |
| chr3 | 35196591 | 35196706 |
| chr3 | 35231571 | 35231726 |
| chr3 | 35252181 | 35252406 |
| chr3 | 35279831 | 35280006 |
| chr3 | 35280021 | 35280196 |
| chr3 | 35280291 | 35280446 |
| chr3 | 35296581 | 35296786 |
| chr3 | 35302801 | 35302956 |
| chr3 | 35345961 | 35346076 |
| chr3 | 35417031 | 35417336 |
| chr3 | 35440751 | 35440966 |
| chr3 | 35536591 | 35536706 |
| chr3 | 35545171 | 35545266 |
| chr3 | 35545551 | 35545656 |
| chr3 | 35548721 | 35549086 |

|      |          |          |
|------|----------|----------|
| chr3 | 35591861 | 35592126 |
| chr3 | 35751531 | 35751756 |
| chr3 | 35921141 | 35921326 |
| chr3 | 35938581 | 35938716 |
| chr3 | 36121491 | 36121686 |
| chr3 | 36216041 | 36216176 |
| chr3 | 36320481 | 36320616 |
| chr3 | 36551381 | 36551506 |
| chr3 | 36723621 | 36723926 |
| chr3 | 37833381 | 37833596 |
| chr3 | 37845161 | 37845466 |
| chr3 | 37850041 | 37850226 |
| chr3 | 37858351 | 37858496 |
| chr3 | 37878011 | 37878166 |
| chr3 | 37914741 | 37914936 |
| chr3 | 37915331 | 37915516 |
| chr3 | 37971781 | 37971966 |
| chr3 | 37972331 | 37972526 |
| chr3 | 38051681 | 38051896 |
| chr3 | 38099141 | 38099376 |
| chr3 | 38108631 | 38108726 |
| chr3 | 38108741 | 38109026 |
| chr3 | 38127841 | 38127996 |
| chr3 | 38179591 | 38179716 |
| chr3 | 38200891 | 38201046 |
| chr3 | 39105191 | 39105426 |
| chr3 | 39803381 | 39803466 |
| chr3 | 40250441 | 40250566 |
| chr3 | 40718691 | 40718836 |
| chr3 | 40783501 | 40783636 |
| chr3 | 41381381 | 41381636 |
| chr3 | 41507361 | 41507526 |
| chr3 | 41677681 | 41677776 |
| chr3 | 41678151 | 41678296 |
| chr3 | 47986031 | 47986146 |
| chr3 | 49964121 | 49964316 |
| chr3 | 50005351 | 50005486 |
| chr3 | 50490501 | 50490636 |
| chr3 | 50818861 | 50818966 |
| chr3 | 50819131 | 50819276 |
| chr3 | 50993221 | 50993396 |
| chr3 | 50999521 | 50999626 |
| chr3 | 51124811 | 51125146 |
| chr3 | 51125161 | 51125276 |
| chr3 | 51180631 | 51180766 |
| chr3 | 51184031 | 51184426 |
| chr3 | 51197081 | 51197236 |
| chr3 | 51199831 | 51199986 |
| chr3 | 51245151 | 51245426 |
| chr3 | 51595581 | 51595826 |
| chr3 | 51641031 | 51641176 |
| chr3 | 51832501 | 51832656 |
| chr3 | 51837821 | 51837996 |

|      |          |          |
|------|----------|----------|
| chr3 | 51849791 | 51850006 |
| chr3 | 51866721 | 51866936 |
| chr3 | 51867031 | 51867156 |
| chr3 | 51876531 | 51876666 |
| chr3 | 51876781 | 51877336 |
| chr3 | 51884801 | 51885076 |
| chr3 | 51886361 | 51886506 |
| chr3 | 51893541 | 51893716 |
| chr3 | 51912771 | 51913006 |
| chr3 | 51921051 | 51921246 |
| chr3 | 51995541 | 51995686 |
| chr3 | 52015121 | 52015256 |
| chr3 | 52023171 | 52023336 |
| chr3 | 52056591 | 52056726 |
| chr3 | 52072911 | 52073156 |
| chr3 | 52083381 | 52083596 |
| chr3 | 52108721 | 52108856 |
| chr3 | 52117681 | 52117916 |
| chr3 | 52118101 | 52118536 |
| chr3 | 52129921 | 52130226 |
| chr3 | 52176521 | 52176776 |
| chr3 | 52177021 | 52177156 |
| chr3 | 52266571 | 52266866 |
| chr3 | 52275201 | 52275286 |
| chr3 | 52285781 | 52285936 |
| chr3 | 52375751 | 52375906 |
| chr3 | 52539331 | 52539636 |
| chr3 | 52551871 | 52552186 |
| chr3 | 52555341 | 52555496 |
| chr3 | 52619761 | 52619846 |
| chr3 | 52629131 | 52629386 |
| chr3 | 52629671 | 52629866 |
| chr3 | 52768571 | 52768726 |
| chr3 | 52799191 | 52799336 |
| chr3 | 52909411 | 52909556 |
| chr3 | 53189091 | 53189286 |
| chr3 | 53290431 | 53290516 |
| chr3 | 53420251 | 53420396 |
| chr3 | 53429251 | 53429536 |
| chr3 | 53632201 | 53632356 |
| chr3 | 53662091 | 53662196 |
| chr3 | 53686371 | 53686596 |
| chr3 | 53818461 | 53818616 |
| chr3 | 54063191 | 54063286 |
| chr3 | 54310271 | 54310366 |
| chr3 | 54446451 | 54446716 |
| chr3 | 54761511 | 54761636 |
| chr3 | 54811901 | 54812086 |
| chr3 | 54841101 | 54841216 |
| chr3 | 54848821 | 54849006 |
| chr3 | 55124411 | 55124516 |
| chr3 | 55154701 | 55154876 |
| chr3 | 55186961 | 55187196 |

|      |          |          |
|------|----------|----------|
| chr3 | 55202841 | 55202996 |
| chr3 | 55435631 | 55435746 |
| chr3 | 55441871 | 55442176 |
| chr3 | 55442331 | 55442506 |
| chr3 | 55455361 | 55455496 |
| chr3 | 55625041 | 55625176 |
| chr3 | 55630851 | 55630976 |
| chr3 | 55675661 | 55675766 |
| chr3 | 55723791 | 55723916 |
| chr3 | 55773691 | 55773816 |
| chr3 | 55817921 | 55818086 |
| chr3 | 55818231 | 55818406 |
| chr3 | 55838761 | 55838926 |
| chr3 | 55843801 | 55843906 |
| chr3 | 55844031 | 55844206 |
| chr3 | 55844221 | 55844526 |
| chr3 | 56053881 | 56054096 |
| chr3 | 56185221 | 56185346 |
| chr3 | 56275571 | 56275726 |
| chr3 | 56559861 | 56559956 |
| chr3 | 57432191 | 57432326 |
| chr3 | 57871301 | 57871386 |
| chr3 | 58043371 | 58043486 |
| chr3 | 58091121 | 58091286 |
| chr3 | 58146081 | 58146396 |
| chr3 | 58200381 | 58200686 |
| chr3 | 58791091 | 58791176 |
| chr3 | 58913951 | 58914096 |
| chr3 | 58949291 | 58949486 |
| chr3 | 58970871 | 58971036 |
| chr3 | 59164681 | 59164826 |
| chr3 | 59209611 | 59209706 |
| chr3 | 59227001 | 59227146 |
| chr3 | 60620781 | 60620926 |
| chr3 | 60651211 | 60651356 |
| chr3 | 60750171 | 60750276 |
| chr3 | 61099801 | 61099866 |
| chr3 | 61570881 | 61570956 |
| chr3 | 62442691 | 62442796 |
| chr3 | 62468231 | 62468346 |
| chr3 | 62468371 | 62468506 |
| chr3 | 62482421 | 62482616 |
| chr3 | 62497681 | 62497906 |
| chr3 | 63378891 | 63378996 |
| chr3 | 63670201 | 63670316 |
| chr3 | 63700781 | 63700906 |
| chr3 | 63731251 | 63731326 |
| chr3 | 63910991 | 63911146 |
| chr3 | 63937761 | 63937886 |
| chr3 | 63937961 | 63938166 |
| chr3 | 63939301 | 63939506 |
| chr3 | 64015151 | 64015246 |
| chr3 | 64128191 | 64128336 |

|      |          |          |
|------|----------|----------|
| chr3 | 64289571 | 64289706 |
| chr3 | 65309771 | 65309876 |
| chr3 | 65629511 | 65629676 |
| chr3 | 65652251 | 65652396 |
| chr3 | 65722851 | 65722966 |
| chr3 | 65723931 | 65724226 |
| chr3 | 65744681 | 65744806 |
| chr3 | 65744871 | 65745076 |
| chr3 | 65946731 | 65947036 |
| chr3 | 65949171 | 65949336 |
| chr3 | 65949381 | 65949476 |
| chr3 | 65950361 | 65950516 |
| chr3 | 65952001 | 65952356 |
| chr3 | 66083241 | 66083326 |
| chr3 | 66380581 | 66380706 |
| chr3 | 66623921 | 66624046 |
| chr3 | 66680271 | 66680386 |
| chr3 | 67027721 | 67027896 |
| chr3 | 67397961 | 67398096 |
| chr3 | 68290871 | 68290996 |
| chr3 | 68294311 | 68294496 |
| chr3 | 68463241 | 68463386 |
| chr3 | 68557171 | 68557326 |
| chr3 | 68600431 | 68600616 |
| chr3 | 68600811 | 68600926 |
| chr3 | 68671281 | 68671426 |
| chr3 | 68671491 | 68671646 |
| chr3 | 68675871 | 68675986 |
| chr3 | 68678511 | 68678626 |
| chr3 | 68696921 | 68697036 |
| chr3 | 68869101 | 68869236 |
| chr3 | 69409451 | 69409606 |
| chr3 | 69558191 | 69558326 |
| chr3 | 69564371 | 69564486 |
| chr3 | 69592621 | 69592836 |
| chr3 | 69599931 | 69600096 |
| chr3 | 69624121 | 69624236 |
| chr3 | 70127221 | 70127346 |
| chr3 | 70386081 | 70386186 |
| chr3 | 70570561 | 70570756 |
| chr3 | 75223361 | 75223466 |
| chr3 | 75807671 | 75807816 |
| chr3 | 78148871 | 78148996 |
| chr3 | 79215181 | 79215296 |
| chr3 | 79255421 | 79255616 |
| chr3 | 79309231 | 79309416 |
| chr3 | 79356981 | 79357146 |
| chr3 | 79362231 | 79362326 |
| chr3 | 79415711 | 79415816 |
| chr3 | 79429091 | 79429246 |
| chr3 | 79495931 | 79496116 |
| chr3 | 79527291 | 79527416 |
| chr3 | 79538721 | 79538916 |



|      |          |          |
|------|----------|----------|
| chr3 | 79541581 | 79541886 |
| chr3 | 79541911 | 79542156 |
| chr3 | 79617671 | 79617796 |
| chr3 | 79904161 | 79904366 |
| chr3 | 79971911 | 79972376 |
| chr3 | 79999921 | 80000056 |
| chr3 | 80075381 | 80075536 |
| chr3 | 80738311 | 80738446 |
| chr3 | 81328991 | 81329146 |
| chr3 | 81744781 | 81744886 |
| chr3 | 82147841 | 82147966 |
| chr3 | 82360651 | 82360866 |
| chr3 | 83668891 | 83669006 |
| chr3 | 83669441 | 83669586 |
| chr3 | 83803871 | 83804056 |
| chr3 | 84052991 | 84053106 |
| chr3 | 84067191 | 84067416 |
| chr3 | 84080281 | 84080486 |
| chr3 | 84171471 | 84171626 |
| chr3 | 84240351 | 84240496 |
| chr3 | 84316091 | 84316186 |
| chr3 | 84317041 | 84317286 |
| chr3 | 84317361 | 84317506 |
| chr3 | 84356221 | 84356436 |
| chr3 | 84368041 | 84368286 |
| chr3 | 84368331 | 84368486 |
| chr3 | 84420821 | 84420896 |
| chr3 | 84497521 | 84497716 |
| chr3 | 84498541 | 84498686 |
| chr3 | 84498871 | 84499196 |
| chr3 | 84499521 | 84499736 |
| chr3 | 84547001 | 84547266 |
| chr3 | 84547841 | 84547976 |
| chr3 | 84564031 | 84564216 |
| chr3 | 84564271 | 84564406 |
| chr3 | 84573691 | 84573846 |
| chr3 | 84583791 | 84583926 |
| chr3 | 84740891 | 84741036 |
| chr3 | 84818181 | 84818426 |
| chr3 | 84820581 | 84820716 |
| chr3 | 84821771 | 84821936 |
| chr3 | 84860271 | 84860426 |
| chr3 | 84911991 | 84912256 |
| chr3 | 84914571 | 84914736 |
| chr3 | 84969851 | 84969976 |
| chr3 | 85037981 | 85038226 |
| chr3 | 85038271 | 85038456 |
| chr3 | 85091821 | 85091926 |
| chr3 | 85197011 | 85197126 |
| chr3 | 85206771 | 85206946 |
| chr3 | 85289551 | 85289886 |
| chr3 | 85290351 | 85290506 |
| chr3 | 85427501 | 85427706 |

|      |          |          |
|------|----------|----------|
| chr3 | 85585671 | 85585826 |
| chr3 | 85602671 | 85602806 |
| chr3 | 85602981 | 85603236 |
| chr3 | 85687781 | 85687906 |
| chr3 | 85690641 | 85690776 |
| chr3 | 85838861 | 85839046 |
| chr3 | 85842191 | 85842346 |
| chr3 | 85850451 | 85850656 |
| chr3 | 85851141 | 85851276 |
| chr3 | 85918221 | 85918356 |
| chr3 | 85918491 | 85918586 |
| chr3 | 85918641 | 85918806 |
| chr3 | 85950351 | 85950456 |
| chr3 | 85992741 | 85992996 |
| chr3 | 85993101 | 85993346 |
| chr3 | 86205301 | 86205456 |
| chr3 | 86247581 | 86247776 |
| chr3 | 86502361 | 86502466 |
| chr3 | 86625631 | 86625786 |
| chr3 | 86625901 | 86626006 |
| chr3 | 86637101 | 86637176 |
| chr3 | 86669911 | 86670046 |
| chr3 | 86845881 | 86846046 |
| chr3 | 86846421 | 86846556 |
| chr3 | 86887591 | 86887706 |
| chr3 | 86905881 | 86906066 |
| chr3 | 86906431 | 86906586 |
| chr3 | 86907051 | 86907156 |
| chr3 | 86943881 | 86944006 |
| chr3 | 87134461 | 87134616 |
| chr3 | 87159231 | 87159386 |
| chr3 | 87235371 | 87235506 |
| chr3 | 87246511 | 87246636 |
| chr3 | 87246711 | 87246876 |
| chr3 | 87279401 | 87279536 |
| chr3 | 87634811 | 87634906 |
| chr3 | 87904341 | 87904486 |
| chr3 | 87999081 | 87999256 |
| chr3 | 88031751 | 88032036 |
| chr3 | 88044411 | 88044566 |
| chr3 | 88044611 | 88044726 |
| chr3 | 88045341 | 88045526 |
| chr3 | 88521581 | 88521806 |
| chr3 | 88533861 | 88534026 |
| chr3 | 88556951 | 88557146 |
| chr3 | 88557181 | 88557316 |
| chr3 | 88557411 | 88557556 |
| chr3 | 88615671 | 88615826 |
| chr3 | 88627011 | 88627146 |
| chr3 | 88710711 | 88710866 |
| chr3 | 88712471 | 88712616 |
| chr3 | 89006181 | 89006306 |
| chr3 | 89178361 | 89178456 |

|      |          |          |
|------|----------|----------|
| chr3 | 89305621 | 89305786 |
| chr3 | 89306061 | 89306246 |
| chr3 | 89579161 | 89579276 |
| chr3 | 89607591 | 89607716 |
| chr3 | 89612611 | 89612716 |
| chr3 | 89655851 | 89656026 |
| chr3 | 89672491 | 89672646 |
| chr3 | 89700031 | 89700156 |
| chr3 | 89739171 | 89739276 |
| chr3 | 89885451 | 89885576 |
| chr3 | 89889121 | 89889236 |
| chr3 | 89981861 | 89982026 |
| chr3 | 89982161 | 89982436 |
| chr3 | 89982561 | 89982686 |
| chr3 | 90533121 | 90533286 |
| chr3 | 90534661 | 90534816 |
| chr3 | 90537631 | 90537836 |
| chr3 | 93516201 | 93516406 |
| chr3 | 93516441 | 93516536 |
| chr3 | 94561711 | 94561866 |
| chr3 | 94766341 | 94766436 |
| chr3 | 94887241 | 94887366 |
| chr3 | 95139921 | 95140036 |
| chr3 | 95215001 | 95215156 |
| chr3 | 95320991 | 95321136 |
| chr3 | 95597321 | 95597466 |
| chr3 | 95600951 | 95601066 |
| chr3 | 95721791 | 95721936 |
| chr3 | 95751731 | 95751846 |
| chr3 | 95752861 | 95752956 |
| chr3 | 95753391 | 95753546 |
| chr3 | 95753591 | 95753866 |
| chr3 | 95754241 | 95754366 |
| chr3 | 95760371 | 95760586 |
| chr3 | 95781741 | 95781936 |
| chr3 | 95782041 | 95782316 |
| chr3 | 96179031 | 96179266 |
| chr3 | 96506481 | 96506596 |
| chr3 | 96661691 | 96662046 |
| chr3 | 96759881 | 96760126 |
| chr3 | 96843171 | 96843366 |
| chr3 | 96843371 | 96843506 |
| chr3 | 96920121 | 96920256 |
| chr3 | 97018841 | 97018986 |
| chr3 | 97063831 | 97063976 |
| chr3 | 97065731 | 97065836 |
| chr3 | 97111021 | 97111176 |
| chr3 | 97384361 | 97384486 |
| chr3 | 97401981 | 97402156 |
| chr3 | 97409721 | 97409826 |
| chr3 | 97410231 | 97410436 |
| chr3 | 97420341 | 97420506 |
| chr3 | 97592801 | 97592946 |

|      |           |           |
|------|-----------|-----------|
| chr3 | 97671061  | 97671206  |
| chr3 | 97671381  | 97671516  |
| chr3 | 97676801  | 97676906  |
| chr3 | 97741181  | 97741316  |
| chr3 | 97747001  | 97747216  |
| chr3 | 97897611  | 97897866  |
| chr3 | 97961771  | 97961916  |
| chr3 | 97963351  | 97963476  |
| chr3 | 98017651  | 98017856  |
| chr3 | 98022871  | 98022996  |
| chr3 | 98025981  | 98026146  |
| chr3 | 98104481  | 98104746  |
| chr3 | 98111771  | 98111976  |
| chr3 | 98113001  | 98113136  |
| chr3 | 98113641  | 98113826  |
| chr3 | 98114671  | 98114856  |
| chr3 | 98115381  | 98115566  |
| chr3 | 98120281  | 98120666  |
| chr3 | 98121281  | 98121406  |
| chr3 | 98122951  | 98123096  |
| chr3 | 98123671  | 98123806  |
| chr3 | 98124771  | 98124876  |
| chr3 | 98124901  | 98125076  |
| chr3 | 98125091  | 98125256  |
| chr3 | 98136851  | 98137186  |
| chr3 | 98138591  | 98138686  |
| chr3 | 98147371  | 98147546  |
| chr3 | 98160451  | 98160646  |
| chr3 | 98190321  | 98190546  |
| chr3 | 98283631  | 98283916  |
| chr3 | 98290501  | 98290616  |
| chr3 | 98322131  | 98322236  |
| chr3 | 98322371  | 98322546  |
| chr3 | 98324981  | 98325086  |
| chr3 | 98328221  | 98328316  |
| chr3 | 98331351  | 98331546  |
| chr3 | 98331551  | 98331686  |
| chr3 | 98332451  | 98332646  |
| chr3 | 98441091  | 98441496  |
| chr3 | 98464721  | 98465176  |
| chr3 | 98492611  | 98492766  |
| chr3 | 99304081  | 99304286  |
| chr3 | 99340241  | 99340456  |
| chr3 | 99794531  | 99794666  |
| chr3 | 99795141  | 99795266  |
| chr3 | 99947161  | 99947366  |
| chr3 | 100011041 | 100011186 |
| chr3 | 100735921 | 100736016 |
| chr3 | 100810671 | 100810796 |
| chr3 | 100810861 | 100811066 |
| chr3 | 100851491 | 100851606 |
| chr3 | 100876611 | 100876736 |
| chr3 | 100902301 | 100902596 |

|      |           |           |
|------|-----------|-----------|
| chr3 | 100962431 | 100962836 |
| chr3 | 100985291 | 100985416 |
| chr3 | 101111151 | 101111386 |
| chr3 | 101118471 | 101118866 |
| chr3 | 101122881 | 101122976 |
| chr3 | 101179131 | 101179246 |
| chr3 | 101223781 | 101223946 |
| chr3 | 101228921 | 101229036 |
| chr3 | 101274701 | 101274856 |
| chr3 | 101290791 | 101290916 |
| chr3 | 101291741 | 101291896 |
| chr3 | 101292291 | 101292556 |
| chr3 | 101294501 | 101294696 |
| chr3 | 101366601 | 101366836 |
| chr3 | 101515631 | 101515926 |
| chr3 | 101525761 | 101525966 |
| chr3 | 101526031 | 101526256 |
| chr3 | 101530341 | 101530486 |
| chr3 | 101530671 | 101530896 |
| chr3 | 101531131 | 101531216 |
| chr3 | 101534751 | 101534906 |
| chr3 | 101535211 | 101535356 |
| chr3 | 101590881 | 101591086 |
| chr3 | 101593481 | 101593606 |
| chr3 | 101642601 | 101642846 |
| chr3 | 101645791 | 101645946 |
| chr3 | 101673271 | 101673456 |
| chr3 | 101725501 | 101725616 |
| chr3 | 101726351 | 101726546 |
| chr3 | 101790261 | 101790616 |
| chr3 | 101821131 | 101821276 |
| chr3 | 101827791 | 101827916 |
| chr3 | 101834171 | 101834286 |
| chr3 | 101842631 | 101842726 |
| chr3 | 101932481 | 101932716 |
| chr3 | 101933481 | 101933836 |
| chr3 | 101934111 | 101934276 |
| chr3 | 101934551 | 101934896 |
| chr3 | 101958601 | 101958756 |
| chr3 | 102006661 | 102006786 |
| chr3 | 102154281 | 102154516 |
| chr3 | 102178251 | 102178436 |
| chr3 | 102181271 | 102181386 |
| chr3 | 102185121 | 102185366 |
| chr3 | 102186401 | 102186536 |
| chr3 | 102275141 | 102275326 |
| chr3 | 102318381 | 102318546 |
| chr3 | 102323211 | 102323376 |
| chr3 | 102323681 | 102323816 |
| chr3 | 102325101 | 102325226 |
| chr3 | 102327671 | 102327766 |
| chr3 | 102482921 | 102483086 |
| chr3 | 102637701 | 102637816 |

|      |           |           |
|------|-----------|-----------|
| chr3 | 103275651 | 103275836 |
| chr3 | 103385181 | 103385366 |
| chr3 | 103504701 | 103504826 |
| chr3 | 103508691 | 103508816 |
| chr3 | 103769481 | 103769746 |
| chr3 | 103786831 | 103786936 |
| chr3 | 103837691 | 103837846 |
| chr3 | 103837981 | 103838106 |
| chr3 | 103845391 | 103845656 |
| chr3 | 103862371 | 103862556 |
| chr3 | 103863111 | 103863246 |
| chr3 | 103870301 | 103870426 |
| chr3 | 103958421 | 103958576 |
| chr3 | 104117251 | 104117386 |
| chr3 | 104408641 | 104408806 |
| chr3 | 104424261 | 104424416 |
| chr3 | 104448131 | 104448326 |
| chr3 | 104570121 | 104570216 |
| chr3 | 104677481 | 104677626 |
| chr3 | 104677661 | 104677766 |
| chr3 | 104690761 | 104690936 |
| chr3 | 104692401 | 104692546 |
| chr3 | 104708341 | 104708486 |
| chr3 | 104728831 | 104728946 |
| chr3 | 104728971 | 104729166 |
| chr3 | 104788761 | 104788896 |
| chr3 | 104919091 | 104919386 |
| chr3 | 104921101 | 104921236 |
| chr3 | 105068981 | 105069196 |
| chr3 | 105072961 | 105073306 |
| chr3 | 105190561 | 105190726 |
| chr3 | 105320051 | 105320236 |
| chr3 | 105337291 | 105337456 |
| chr3 | 105488321 | 105488446 |
| chr3 | 105620901 | 105620986 |
| chr3 | 105623111 | 105623286 |
| chr3 | 105658801 | 105658956 |
| chr3 | 105755551 | 105755686 |
| chr3 | 105908991 | 105909076 |
| chr3 | 107304751 | 107304906 |
| chr3 | 107453731 | 107453826 |
| chr3 | 107459031 | 107459296 |
| chr3 | 107673871 | 107674006 |
| chr3 | 107674231 | 107674456 |
| chr3 | 107842951 | 107843126 |
| chr3 | 107895871 | 107896026 |
| chr3 | 107896511 | 107896726 |
| chr3 | 107896991 | 107897166 |
| chr3 | 107924721 | 107924836 |
| chr3 | 107947441 | 107947596 |
| chr3 | 107997391 | 107997496 |
| chr3 | 108180311 | 108180426 |
| chr3 | 108293141 | 108293306 |

|      |           |           |
|------|-----------|-----------|
| chr3 | 108418411 | 108418526 |
| chr3 | 108604981 | 108605126 |
| chr3 | 108605321 | 108605456 |
| chr3 | 108605471 | 108605626 |
| chr3 | 109009191 | 109009636 |
| chr3 | 109171701 | 109171836 |
| chr3 | 109672261 | 109672476 |
| chr3 | 109674711 | 109674846 |
| chr3 | 109707051 | 109707196 |
| chr3 | 109908781 | 109908986 |
| chr3 | 110150951 | 110151496 |
| chr3 | 115633611 | 115633706 |
| chr3 | 115658681 | 115658806 |
| chr3 | 115756921 | 115757036 |
| chr3 | 115814571 | 115814646 |
| chr3 | 115875891 | 115876036 |
| chr3 | 115985081 | 115985256 |
| chr3 | 116096941 | 116097176 |
| chr3 | 116140261 | 116140636 |
| chr3 | 116273391 | 116273556 |
| chr3 | 116274601 | 116274716 |
| chr3 | 116367971 | 116368126 |
| chr3 | 116372531 | 116372626 |
| chr3 | 116380951 | 116381166 |
| chr3 | 116391811 | 116391906 |
| chr3 | 116392541 | 116392736 |
| chr3 | 116403021 | 116403226 |
| chr3 | 116413131 | 116413286 |
| chr3 | 116915411 | 116915566 |
| chr3 | 116934821 | 116935026 |
| chr3 | 116960661 | 116961046 |
| chr3 | 116980821 | 116981036 |
| chr3 | 116993741 | 116993906 |
| chr3 | 117493521 | 117493636 |
| chr3 | 117640691 | 117640906 |
| chr3 | 117721611 | 117721766 |
| chr3 | 117859131 | 117859286 |
| chr3 | 119013281 | 119013446 |
| chr3 | 119940971 | 119941316 |
| chr3 | 119941661 | 119941786 |
| chr3 | 119941841 | 119942036 |
| chr3 | 120862601 | 120862736 |
| chr3 | 120876231 | 120876406 |
| chr3 | 120876421 | 120876596 |
| chr3 | 121016921 | 121017196 |
| chr3 | 121108781 | 121108966 |
| chr3 | 121333751 | 121333906 |
| chr3 | 121337311 | 121337636 |
| chr3 | 121438531 | 121438756 |
| chr3 | 121440041 | 121440286 |
| chr3 | 121440341 | 121440556 |
| chr3 | 121440571 | 121440806 |
| chr3 | 121475531 | 121476146 |

|      |           |           |
|------|-----------|-----------|
| chr3 | 121523061 | 121523276 |
| chr3 | 121526581 | 121526816 |
| chr3 | 121526881 | 121526966 |
| chr3 | 121569021 | 121569156 |
| chr3 | 121609531 | 121609666 |
| chr3 | 121610391 | 121610536 |
| chr3 | 121637661 | 121637806 |
| chr3 | 121731631 | 121731886 |
| chr3 | 121785391 | 121785516 |
| chr3 | 121883531 | 121883666 |
| chr3 | 121889241 | 121889406 |
| chr3 | 121942181 | 121942336 |
| chr3 | 121942381 | 121942516 |
| chr3 | 122027161 | 122027386 |
| chr3 | 122038281 | 122038696 |
| chr3 | 122039591 | 122039696 |
| chr3 | 122045941 | 122046086 |
| chr3 | 122046131 | 122046226 |
| chr3 | 122074461 | 122074616 |
| chr3 | 122077861 | 122078056 |
| chr3 | 122080371 | 122080496 |
| chr3 | 122080521 | 122080626 |
| chr3 | 122095831 | 122096036 |
| chr3 | 122198201 | 122198456 |
| chr3 | 122205691 | 122205896 |
| chr3 | 122306091 | 122306216 |
| chr3 | 122306661 | 122306776 |
| chr3 | 122335621 | 122335826 |
| chr3 | 122368441 | 122368626 |
| chr3 | 122406181 | 122406356 |
| chr3 | 122449381 | 122449486 |
| chr3 | 122454521 | 122454766 |
| chr3 | 122458431 | 122458606 |
| chr3 | 122475051 | 122475246 |
| chr3 | 122485351 | 122485596 |
| chr3 | 122532481 | 122532666 |
| chr3 | 122557491 | 122557586 |
| chr3 | 122627361 | 122627516 |
| chr3 | 122929331 | 122929426 |
| chr3 | 122962051 | 122962216 |
| chr3 | 123017741 | 123017896 |
| chr3 | 123020891 | 123021176 |
| chr3 | 123029351 | 123029506 |
| chr3 | 123070251 | 123070416 |
| chr3 | 123070521 | 123070586 |
| chr3 | 123114771 | 123114916 |
| chr3 | 123288741 | 123288946 |
| chr3 | 124133501 | 124133636 |
| chr3 | 124644301 | 124644476 |
| chr3 | 125330401 | 125330496 |
| chr3 | 125396111 | 125396456 |
| chr3 | 126036491 | 126036616 |
| chr3 | 126592141 | 126592416 |



|      |           |           |
|------|-----------|-----------|
| chr3 | 126602241 | 126602486 |
| chr3 | 126687481 | 126687986 |
| chr3 | 126691521 | 126691706 |
| chr3 | 126763111 | 126763326 |
| chr3 | 126980261 | 126980426 |
| chr3 | 127122541 | 127122666 |
| chr3 | 127287151 | 127287286 |
| chr3 | 127294321 | 127294436 |
| chr3 | 127348401 | 127348586 |
| chr3 | 127379191 | 127379356 |
| chr3 | 127379371 | 127379506 |
| chr3 | 127522691 | 127522816 |
| chr3 | 127697561 | 127697696 |
| chr3 | 127721171 | 127721456 |
| chr3 | 127721621 | 127721836 |
| chr3 | 127750451 | 127750586 |
| chr3 | 127797261 | 127797366 |
| chr3 | 127866311 | 127866416 |
| chr3 | 127866661 | 127866796 |
| chr3 | 128184521 | 128184616 |
| chr3 | 128187581 | 128187756 |
| chr3 | 128421031 | 128421216 |
| chr3 | 129214531 | 129214636 |
| chr3 | 129219111 | 129219266 |
| chr3 | 129281671 | 129281796 |
| chr3 | 129284881 | 129285186 |
| chr3 | 129530121 | 129530256 |
| chr3 | 129530491 | 129530586 |
| chr3 | 129540211 | 129540356 |
| chr3 | 129611371 | 129611576 |
| chr3 | 129611631 | 129611726 |
| chr3 | 129839561 | 129839706 |
| chr3 | 130161851 | 130162126 |
| chr3 | 130316641 | 130316866 |
| chr3 | 130327781 | 130327876 |
| chr3 | 130329171 | 130329316 |
| chr3 | 130358711 | 130358836 |
| chr3 | 130358851 | 130359156 |
| chr3 | 130430241 | 130430386 |
| chr3 | 130481971 | 130482156 |
| chr3 | 130660641 | 130660796 |
| chr3 | 130726891 | 130727066 |
| chr3 | 130727211 | 130727326 |
| chr3 | 130747641 | 130748136 |
| chr3 | 130856301 | 130856456 |
| chr3 | 131003731 | 131003946 |
| chr3 | 131008921 | 131009136 |
| chr3 | 131126561 | 131126796 |
| chr3 | 131316541 | 131316696 |
| chr3 | 131320951 | 131321026 |
| chr3 | 131323971 | 131324086 |
| chr3 | 131435811 | 131436016 |
| chr3 | 131575021 | 131575286 |

|      |           |           |
|------|-----------|-----------|
| chr3 | 131855191 | 131855326 |
| chr3 | 131904651 | 131904866 |
| chr3 | 131944331 | 131944456 |
| chr3 | 131955021 | 131955316 |
| chr3 | 131955361 | 131955466 |
| chr3 | 131958081 | 131958186 |
| chr3 | 132040721 | 132040846 |
| chr3 | 132075721 | 132075816 |
| chr3 | 132185071 | 132185196 |
| chr3 | 132709451 | 132709656 |
| chr3 | 132731971 | 132732066 |
| chr3 | 132796131 | 132796386 |
| chr3 | 132798031 | 132798176 |
| chr3 | 132801541 | 132801696 |
| chr3 | 132881761 | 132881856 |
| chr3 | 132885781 | 132885956 |
| chr3 | 132918391 | 132918576 |
| chr3 | 133223961 | 133224056 |
| chr3 | 133319481 | 133319646 |
| chr3 | 133473121 | 133473316 |
| chr3 | 133551521 | 133551616 |
| chr3 | 133691731 | 133691866 |
| chr3 | 134127571 | 134127706 |
| chr3 | 134240111 | 134240316 |
| chr3 | 134240941 | 134241076 |
| chr3 | 134788741 | 134788886 |
| chr3 | 134965771 | 134965946 |
| chr3 | 135172981 | 135173136 |
| chr3 | 135348571 | 135348776 |
| chr3 | 135349281 | 135349596 |
| chr3 | 135573871 | 135574286 |
| chr3 | 135579051 | 135579176 |
| chr3 | 135618851 | 135618956 |
| chr3 | 135626361 | 135626566 |
| chr3 | 135629261 | 135629426 |
| chr3 | 135752091 | 135752226 |
| chr3 | 135752351 | 135752476 |
| chr3 | 135806581 | 135806756 |
| chr3 | 135824831 | 135824926 |
| chr3 | 135825361 | 135825496 |
| chr3 | 136179071 | 136179176 |
| chr3 | 136611881 | 136612026 |
| chr3 | 136642001 | 136642116 |
| chr3 | 136859631 | 136859746 |
| chr3 | 136924071 | 136924216 |
| chr3 | 137259801 | 137260026 |
| chr3 | 137674691 | 137675106 |
| chr3 | 137765181 | 137765536 |
| chr3 | 137988221 | 137988476 |
| chr3 | 137990661 | 137990806 |
| chr3 | 138062351 | 138062566 |
| chr3 | 138062711 | 138062816 |
| chr3 | 138068651 | 138068796 |

|      |           |           |
|------|-----------|-----------|
| chr3 | 138191571 | 138191706 |
| chr3 | 138192751 | 138192936 |
| chr3 | 138223081 | 138223226 |
| chr3 | 138437671 | 138437886 |
| chr3 | 138592161 | 138592516 |
| chr3 | 138690691 | 138690906 |
| chr3 | 138690941 | 138691116 |
| chr3 | 138715301 | 138715456 |
| chr3 | 138715541 | 138715716 |
| chr3 | 138754941 | 138755026 |
| chr3 | 138761351 | 138761626 |
| chr3 | 138764021 | 138764146 |
| chr3 | 138787471 | 138787706 |
| chr3 | 138788631 | 138788976 |
| chr3 | 138789751 | 138789916 |
| chr3 | 138792081 | 138792266 |
| chr3 | 138792331 | 138792476 |
| chr3 | 138797931 | 138798046 |
| chr3 | 138798481 | 138798596 |
| chr3 | 138831251 | 138831406 |
| chr3 | 139480731 | 139480956 |
| chr3 | 139794381 | 139794536 |
| chr3 | 139798481 | 139798706 |
| chr3 | 140950861 | 140950956 |
| chr3 | 141538491 | 141538756 |
| chr3 | 141557041 | 141557156 |
| chr3 | 141597941 | 141598156 |
| chr3 | 141671441 | 141671576 |
| chr3 | 141872091 | 141872246 |
| chr3 | 141873931 | 141874416 |
| chr3 | 141874471 | 141874596 |
| chr3 | 141908491 | 141908676 |
| chr3 | 142001271 | 142001616 |
| chr3 | 142002601 | 142002916 |
| chr3 | 142045221 | 142045316 |
| chr3 | 142047381 | 142047466 |
| chr3 | 142047551 | 142047736 |
| chr3 | 142067141 | 142067376 |
| chr3 | 142248011 | 142248146 |
| chr3 | 142361021 | 142361196 |
| chr3 | 142361261 | 142361386 |
| chr3 | 142372331 | 142372486 |
| chr3 | 142694551 | 142694696 |
| chr3 | 142907621 | 142907716 |
| chr3 | 142907781 | 142907946 |
| chr3 | 142908451 | 142908516 |
| chr3 | 142912741 | 142912916 |
| chr3 | 143028351 | 143028556 |
| chr3 | 143042001 | 143042196 |
| chr3 | 143126451 | 143126606 |
| chr3 | 143389111 | 143389206 |
| chr3 | 143503371 | 143503476 |
| chr3 | 143507351 | 143507546 |

|      |           |           |
|------|-----------|-----------|
| chr3 | 143568781 | 143568896 |
| chr3 | 143802291 | 143802486 |
| chr3 | 143803111 | 143803346 |
| chr3 | 143803431 | 143803646 |
| chr3 | 143884961 | 143885096 |
| chr3 | 143918571 | 143918776 |
| chr3 | 143948101 | 143948206 |
| chr3 | 143949111 | 143949336 |
| chr3 | 143962991 | 143963136 |
| chr3 | 143963271 | 143963396 |
| chr3 | 143987101 | 143987226 |
| chr3 | 144134881 | 144135006 |
| chr3 | 144294101 | 144294166 |
| chr3 | 144408551 | 144408686 |
| chr3 | 144491411 | 144491616 |
| chr3 | 144552111 | 144552226 |
| chr3 | 144601801 | 144602206 |
| chr3 | 144602371 | 144602616 |
| chr3 | 145539991 | 145540086 |
| chr3 | 145560481 | 145560586 |
| chr3 | 145571771 | 145571926 |
| chr3 | 145634661 | 145634756 |
| chr3 | 145640331 | 145640456 |
| chr3 | 145703651 | 145703726 |
| chr3 | 145736191 | 145736466 |
| chr3 | 145736491 | 145736586 |
| chr3 | 145742871 | 145742966 |
| chr3 | 145765081 | 145765276 |
| chr3 | 145765311 | 145765526 |
| chr3 | 145800101 | 145800236 |
| chr3 | 145947751 | 145947916 |
| chr3 | 145949641 | 145949746 |
| chr3 | 145982591 | 145982766 |
| chr3 | 146136271 | 146136406 |
| chr3 | 146142691 | 146143146 |
| chr3 | 146145391 | 146145606 |
| chr3 | 146173871 | 146173986 |
| chr3 | 146194981 | 146195106 |
| chr3 | 146213451 | 146213636 |
| chr3 | 146275251 | 146275476 |
| chr3 | 146312841 | 146312966 |
| chr3 | 146317281 | 146317416 |
| chr3 | 146707981 | 146708076 |
| chr3 | 147036701 | 147036836 |
| chr3 | 147054941 | 147055116 |
| chr3 | 147820951 | 147821036 |
| chr3 | 147903981 | 147904066 |
| chr3 | 147969851 | 147970006 |
| chr3 | 148216511 | 148216586 |
| chr3 | 148355661 | 148355806 |
| chr3 | 148379301 | 148379366 |
| chr3 | 148379541 | 148379736 |
| chr3 | 148569211 | 148569416 |

|      |           |           |
|------|-----------|-----------|
| chr3 | 148670791 | 148670886 |
| chr3 | 148682451 | 148682606 |
| chr3 | 148706481 | 148706606 |
| chr3 | 148750041 | 148750256 |
| chr3 | 148751081 | 148751236 |
| chr3 | 148789921 | 148790236 |
| chr3 | 148791751 | 148791976 |
| chr3 | 148833671 | 148833836 |
| chr3 | 148874461 | 148874566 |
| chr3 | 148876781 | 148876896 |
| chr3 | 148879611 | 148879696 |
| chr3 | 148880271 | 148880436 |
| chr3 | 148886151 | 148886266 |
| chr3 | 148895541 | 148895806 |
| chr3 | 148914571 | 148914716 |
| chr3 | 148914781 | 148914896 |
| chr3 | 148943301 | 148943496 |
| chr3 | 149117581 | 149117806 |
| chr3 | 149127591 | 149127696 |
| chr3 | 149127771 | 149127876 |
| chr3 | 149142491 | 149142586 |
| chr3 | 149189361 | 149189456 |
| chr3 | 149189991 | 149190196 |
| chr3 | 149232671 | 149232896 |
| chr3 | 149251851 | 149252056 |
| chr3 | 149252521 | 149252676 |
| chr3 | 149256081 | 149256236 |
| chr3 | 149269121 | 149269236 |
| chr3 | 149382781 | 149382946 |
| chr3 | 149422661 | 149422796 |
| chr3 | 149506571 | 149506686 |
| chr3 | 149513421 | 149513686 |
| chr3 | 149657761 | 149657946 |
| chr3 | 149764331 | 149764606 |
| chr3 | 149774351 | 149774496 |
| chr3 | 149827781 | 149827886 |
| chr3 | 150937731 | 150937916 |
| chr3 | 151090931 | 151091006 |
| chr3 | 151829141 | 151829396 |
| chr3 | 152012991 | 152013066 |
| chr3 | 152131831 | 152131926 |
| chr3 | 152201981 | 152202096 |
| chr3 | 152202261 | 152202356 |
| chr3 | 152202391 | 152202506 |
| chr3 | 152241971 | 152242116 |
| chr3 | 152407931 | 152408056 |
| chr3 | 152527941 | 152528066 |
| chr3 | 152735001 | 152735136 |
| chr3 | 152767311 | 152767426 |
| chr3 | 152803521 | 152803706 |
| chr3 | 152861101 | 152861326 |
| chr3 | 152916921 | 152917066 |
| chr3 | 153022651 | 153022786 |

|      |           |           |
|------|-----------|-----------|
| chr3 | 153022881 | 153023016 |
| chr3 | 153542651 | 153542776 |
| chr3 | 153542891 | 153543106 |
| chr3 | 153543181 | 153543246 |
| chr3 | 153639901 | 153640076 |
| chr3 | 153675931 | 153676156 |
| chr3 | 153721681 | 153721816 |
| chr3 | 153955201 | 153955316 |
| chr3 | 154062661 | 154062876 |
| chr3 | 154062901 | 154063116 |
| chr3 | 154115611 | 154115766 |
| chr3 | 154137811 | 154138006 |
| chr3 | 154138101 | 154138286 |
| chr3 | 154403011 | 154403106 |
| chr3 | 154484261 | 154484356 |
| chr3 | 154484361 | 154484476 |
| chr3 | 154486361 | 154486466 |
| chr3 | 154505371 | 154505496 |
| chr3 | 154710751 | 154710916 |
| chr3 | 154746481 | 154746666 |
| chr3 | 155618861 | 155619046 |
| chr3 | 156239471 | 156239596 |
| chr3 | 156915581 | 156915766 |
| chr3 | 157203671 | 157203826 |
| chr3 | 157248271 | 157248386 |
| chr3 | 158097031 | 158097146 |
| chr3 | 159723381 | 159723476 |
| chr2 | 3052401   | 3052506   |
| chr2 | 3054951   | 3055036   |
| chr2 | 3060821   | 3060976   |
| chr2 | 3535211   | 3535346   |
| chr2 | 3600151   | 3600286   |
| chr2 | 3620111   | 3620216   |
| chr2 | 3647951   | 3648096   |
| chr2 | 3791051   | 3791186   |
| chr2 | 3804371   | 3804576   |
| chr2 | 3805011   | 3805426   |
| chr2 | 3806091   | 3806216   |
| chr2 | 3808091   | 3808236   |
| chr2 | 3959601   | 3959746   |
| chr2 | 4070051   | 4070266   |
| chr2 | 4070441   | 4070706   |
| chr2 | 4070731   | 4070866   |
| chr2 | 4160811   | 4160966   |
| chr2 | 4161501   | 4161686   |
| chr2 | 4161731   | 4161996   |
| chr2 | 4167121   | 4167276   |
| chr2 | 4178031   | 4178296   |
| chr2 | 4216051   | 4216486   |
| chr2 | 4216551   | 4216686   |
| chr2 | 4324201   | 4324316   |
| chr2 | 4369891   | 4370016   |
| chr2 | 4441111   | 4441246   |

|      |          |          |
|------|----------|----------|
| chr2 | 4470721  | 4470826  |
| chr2 | 4513651  | 4513816  |
| chr2 | 4633981  | 4634166  |
| chr2 | 5232611  | 5232746  |
| chr2 | 5615671  | 5615766  |
| chr2 | 5647901  | 5648056  |
| chr2 | 6015121  | 6015296  |
| chr2 | 6096111  | 6096336  |
| chr2 | 6096471  | 6096596  |
| chr2 | 6130491  | 6130636  |
| chr2 | 6197091  | 6197196  |
| chr2 | 6269871  | 6269966  |
| chr2 | 6276111  | 6276266  |
| chr2 | 6423351  | 6423806  |
| chr2 | 6464501  | 6464646  |
| chr2 | 6782821  | 6782956  |
| chr2 | 6850481  | 6850676  |
| chr2 | 7125821  | 7125956  |
| chr2 | 7137121  | 7137236  |
| chr2 | 7755831  | 7755966  |
| chr2 | 8736051  | 8736176  |
| chr2 | 9255451  | 9255596  |
| chr2 | 9448691  | 9448886  |
| chr2 | 9482701  | 9482846  |
| chr2 | 9535441  | 9535556  |
| chr2 | 9550891  | 9551066  |
| chr2 | 9551131  | 9551266  |
| chr2 | 9770801  | 9771166  |
| chr2 | 9771341  | 9771446  |
| chr2 | 9792921  | 9793036  |
| chr2 | 9810481  | 9810636  |
| chr2 | 9814141  | 9814326  |
| chr2 | 9815811  | 9815996  |
| chr2 | 9904171  | 9904266  |
| chr2 | 9908141  | 9908226  |
| chr2 | 10160951 | 10161286 |
| chr2 | 10215871 | 10216066 |
| chr2 | 10339071 | 10339206 |
| chr2 | 10349521 | 10349716 |
| chr2 | 10592471 | 10592606 |
| chr2 | 10619221 | 10619436 |
| chr2 | 10619451 | 10619586 |
| chr2 | 10654511 | 10654666 |
| chr2 | 11382361 | 11382536 |
| chr2 | 11978331 | 11978436 |
| chr2 | 12887991 | 12888156 |
| chr2 | 12896071 | 12896176 |
| chr2 | 13002241 | 13002396 |
| chr2 | 13047321 | 13047416 |
| chr2 | 13047431 | 13047576 |
| chr2 | 13047761 | 13047866 |
| chr2 | 13093551 | 13093746 |
| chr2 | 13113491 | 13113666 |

|      |          |          |
|------|----------|----------|
| chr2 | 13121091 | 13121186 |
| chr2 | 13158581 | 13158846 |
| chr2 | 13407491 | 13407656 |
| chr2 | 13418301 | 13418446 |
| chr2 | 13419551 | 13419726 |
| chr2 | 13494011 | 13494156 |
| chr2 | 13625761 | 13625896 |
| chr2 | 13755061 | 13755186 |
| chr2 | 13853741 | 13853826 |
| chr2 | 13873391 | 13873486 |
| chr2 | 13961591 | 13961726 |
| chr2 | 14657501 | 14657606 |
| chr2 | 14742331 | 14742456 |
| chr2 | 14791661 | 14791876 |
| chr2 | 14825021 | 14825116 |
| chr2 | 16489001 | 16489106 |
| chr2 | 16656111 | 16656276 |
| chr2 | 16742251 | 16742356 |
| chr2 | 17441911 | 17441976 |
| chr2 | 17517691 | 17517886 |
| chr2 | 17553321 | 17553536 |
| chr2 | 17587741 | 17587916 |
| chr2 | 17607251 | 17607376 |
| chr2 | 17739991 | 17740116 |
| chr2 | 17785911 | 17786106 |
| chr2 | 17786141 | 17786346 |
| chr2 | 17787071 | 17787236 |
| chr2 | 17798891 | 17798996 |
| chr2 | 17799341 | 17799436 |
| chr2 | 17850511 | 17850686 |
| chr2 | 17948401 | 17948626 |
| chr2 | 17952481 | 17952586 |
| chr2 | 18078861 | 18079016 |
| chr2 | 18149011 | 18149146 |
| chr2 | 18290231 | 18290406 |
| chr2 | 18547851 | 18547976 |
| chr2 | 18649631 | 18649796 |
| chr2 | 18672401 | 18672696 |
| chr2 | 18696081 | 18696196 |
| chr2 | 18696261 | 18696446 |
| chr2 | 18739241 | 18739356 |
| chr2 | 18739451 | 18739536 |
| chr2 | 18739691 | 18739806 |
| chr2 | 18740701 | 18740906 |
| chr2 | 18842131 | 18842226 |
| chr2 | 18856971 | 18857126 |
| chr2 | 19305191 | 19305396 |
| chr2 | 19940361 | 19940536 |
| chr2 | 19940601 | 19940746 |
| chr2 | 19990531 | 19990596 |
| chr2 | 20267251 | 20267406 |
| chr2 | 20293041 | 20293186 |
| chr2 | 20335231 | 20335326 |



|      |          |          |
|------|----------|----------|
| chr2 | 20335771 | 20335936 |
| chr2 | 20337891 | 20338066 |
| chr2 | 20361841 | 20361906 |
| chr2 | 20394621 | 20394746 |
| chr2 | 20451731 | 20451876 |
| chr2 | 20464431 | 20464566 |
| chr2 | 20481041 | 20481146 |
| chr2 | 20560781 | 20560946 |
| chr2 | 20567401 | 20567516 |
| chr2 | 20589431 | 20589566 |
| chr2 | 20589801 | 20589956 |
| chr2 | 20607181 | 20607346 |
| chr2 | 20797791 | 20797936 |
| chr2 | 20834051 | 20834176 |
| chr2 | 20837871 | 20838176 |
| chr2 | 20850881 | 20851116 |
| chr2 | 20873141 | 20873386 |
| chr2 | 20883481 | 20883666 |
| chr2 | 20896641 | 20896796 |
| chr2 | 21827281 | 21827456 |
| chr2 | 21836381 | 21836476 |
| chr2 | 21856941 | 21857126 |
| chr2 | 22023111 | 22023386 |
| chr2 | 22088071 | 22088176 |
| chr2 | 22837411 | 22837606 |
| chr2 | 23189701 | 23189866 |
| chr2 | 23386571 | 23386686 |
| chr2 | 23870811 | 23870966 |
| chr2 | 24250411 | 24250566 |
| chr2 | 24301031 | 24301186 |
| chr2 | 24376071 | 24376256 |
| chr2 | 24727451 | 24727556 |
| chr2 | 24840001 | 24840166 |
| chr2 | 24840221 | 24840366 |
| chr2 | 24898231 | 24898336 |
| chr2 | 24948011 | 24948546 |
| chr2 | 24992061 | 24992166 |
| chr2 | 25302181 | 25302306 |
| chr2 | 25808711 | 25808896 |
| chr2 | 25835241 | 25835336 |
| chr2 | 25900391 | 25900516 |
| chr2 | 25926931 | 25927086 |
| chr2 | 25969891 | 25970036 |
| chr2 | 25997351 | 25997686 |
| chr2 | 26108501 | 26108766 |
| chr2 | 26111771 | 26111906 |
| chr2 | 26309481 | 26309576 |
| chr2 | 26322611 | 26322746 |
| chr2 | 26397021 | 26397156 |
| chr2 | 26483551 | 26483676 |
| chr2 | 26974781 | 26974976 |
| chr2 | 27152831 | 27152976 |
| chr2 | 27166101 | 27166236 |

|      |          |          |
|------|----------|----------|
| chr2 | 27183901 | 27184196 |
| chr2 | 27185811 | 27186076 |
| chr2 | 27426681 | 27426786 |
| chr2 | 27517191 | 27517346 |
| chr2 | 27595081 | 27595206 |
| chr2 | 27624681 | 27624776 |
| chr2 | 27680411 | 27680506 |
| chr2 | 27693131 | 27693296 |
| chr2 | 27779381 | 27779526 |
| chr2 | 27912521 | 27912636 |
| chr2 | 27939791 | 27939986 |
| chr2 | 27940011 | 27940136 |
| chr2 | 27940201 | 27940286 |
| chr2 | 28033911 | 28034126 |
| chr2 | 28060481 | 28060626 |
| chr2 | 28064211 | 28064326 |
| chr2 | 28074731 | 28074886 |
| chr2 | 28075201 | 28075306 |
| chr2 | 28095231 | 28095516 |
| chr2 | 28247341 | 28247486 |
| chr2 | 28452051 | 28452146 |
| chr2 | 28549851 | 28549966 |
| chr2 | 28550031 | 28550326 |
| chr2 | 28619391 | 28619766 |
| chr2 | 28715711 | 28715886 |
| chr2 | 28727601 | 28727696 |
| chr2 | 28766011 | 28766186 |
| chr2 | 28774991 | 28775146 |
| chr2 | 28838341 | 28838436 |
| chr2 | 28838441 | 28838546 |
| chr2 | 28838671 | 28838996 |
| chr2 | 28856091 | 28856256 |
| chr2 | 28856421 | 28856836 |
| chr2 | 28857761 | 28858116 |
| chr2 | 28861201 | 28861376 |
| chr2 | 29244111 | 29244276 |
| chr2 | 29262261 | 29262396 |
| chr2 | 29303461 | 29303566 |
| chr2 | 29335441 | 29335566 |
| chr2 | 29336581 | 29336736 |
| chr2 | 29396191 | 29396346 |
| chr2 | 29396441 | 29396636 |
| chr2 | 29408261 | 29408406 |
| chr2 | 29668341 | 29668636 |
| chr2 | 29677421 | 29677586 |
| chr2 | 30221011 | 30221286 |
| chr2 | 30221451 | 30221556 |
| chr2 | 30363821 | 30363926 |
| chr2 | 30428651 | 30429106 |
| chr2 | 30469721 | 30469796 |
| chr2 | 30474651 | 30474766 |
| chr2 | 30481171 | 30481466 |
| chr2 | 30489551 | 30489836 |

|      |          |          |
|------|----------|----------|
| chr2 | 30492161 | 30492556 |
| chr2 | 30582781 | 30582876 |
| chr2 | 30601771 | 30601936 |
| chr2 | 30658751 | 30658856 |
| chr2 | 30664661 | 30664846 |
| chr2 | 30669011 | 30669146 |
| chr2 | 30669191 | 30669356 |
| chr2 | 30696481 | 30696926 |
| chr2 | 30698071 | 30698196 |
| chr2 | 30698231 | 30698406 |
| chr2 | 30715241 | 30715486 |
| chr2 | 30728061 | 30728196 |
| chr2 | 30740791 | 30740916 |
| chr2 | 30820951 | 30821086 |
| chr2 | 30923691 | 30923856 |
| chr2 | 30959251 | 30959346 |
| chr2 | 31245251 | 31245416 |
| chr2 | 31316441 | 31316606 |
| chr2 | 31316991 | 31317206 |
| chr2 | 31317391 | 31317576 |
| chr2 | 31317831 | 31317976 |
| chr2 | 31318131 | 31318236 |
| chr2 | 31321991 | 31322136 |
| chr2 | 31335381 | 31335496 |
| chr2 | 31432201 | 31432356 |
| chr2 | 31438821 | 31438966 |
| chr2 | 31566101 | 31566266 |
| chr2 | 31571211 | 31571386 |
| chr2 | 31583721 | 31583866 |
| chr2 | 31672191 | 31672356 |
| chr2 | 31696471 | 31696626 |
| chr2 | 31975541 | 31975626 |
| chr2 | 31986721 | 31986816 |
| chr2 | 32151071 | 32151286 |
| chr2 | 32151331 | 32151516 |
| chr2 | 32261271 | 32261516 |
| chr2 | 32412381 | 32412906 |
| chr2 | 32459731 | 32460056 |
| chr2 | 32475821 | 32475916 |
| chr2 | 32475971 | 32476146 |
| chr2 | 32476651 | 32476756 |
| chr2 | 32476921 | 32477016 |
| chr2 | 32580761 | 32580956 |
| chr2 | 32639141 | 32639516 |
| chr2 | 32645341 | 32645576 |
| chr2 | 32646311 | 32646436 |
| chr2 | 32646471 | 32646596 |
| chr2 | 32691081 | 32691226 |
| chr2 | 33026361 | 33026566 |
| chr2 | 33138511 | 33138686 |
| chr2 | 33258001 | 33258166 |
| chr2 | 33258181 | 33258456 |
| chr2 | 33260131 | 33260326 |

|      |          |          |
|------|----------|----------|
| chr2 | 33407251 | 33407446 |
| chr2 | 33417241 | 33417336 |
| chr2 | 33425151 | 33425326 |
| chr2 | 33425331 | 33425476 |
| chr2 | 33523221 | 33523356 |
| chr2 | 33537161 | 33537276 |
| chr2 | 33574831 | 33575056 |
| chr2 | 33607501 | 33607646 |
| chr2 | 33607741 | 33607936 |
| chr2 | 33660591 | 33660736 |
| chr2 | 33692441 | 33692536 |
| chr2 | 33698781 | 33698886 |
| chr2 | 33928371 | 33928676 |
| chr2 | 33928731 | 33929146 |
| chr2 | 33997841 | 33997996 |
| chr2 | 34057981 | 34058076 |
| chr2 | 34068241 | 34068356 |
| chr2 | 34109761 | 34109886 |
| chr2 | 34110641 | 34110866 |
| chr2 | 34124921 | 34125076 |
| chr2 | 34169311 | 34169416 |
| chr2 | 34177851 | 34178006 |
| chr2 | 34395581 | 34395706 |
| chr2 | 34413761 | 34413966 |
| chr2 | 34422871 | 34423096 |
| chr2 | 34424161 | 34424426 |
| chr2 | 34424491 | 34424586 |
| chr2 | 34425771 | 34426016 |
| chr2 | 34496901 | 34497006 |
| chr2 | 35081751 | 35081906 |
| chr2 | 35092631 | 35092746 |
| chr2 | 35199841 | 35199956 |
| chr2 | 35233891 | 35234066 |
| chr2 | 35254051 | 35254376 |
| chr2 | 35254681 | 35254826 |
| chr2 | 35309391 | 35309526 |
| chr2 | 35325511 | 35325656 |
| chr2 | 35331401 | 35331616 |
| chr2 | 35426501 | 35426636 |
| chr2 | 35429531 | 35429776 |
| chr2 | 35586251 | 35586666 |
| chr2 | 35589901 | 35590056 |
| chr2 | 35666991 | 35667116 |
| chr2 | 35673801 | 35673976 |
| chr2 | 35673981 | 35674236 |
| chr2 | 35674241 | 35674376 |
| chr2 | 35675001 | 35675136 |
| chr2 | 35682531 | 35682706 |
| chr2 | 35706401 | 35706586 |
| chr2 | 35733121 | 35733316 |
| chr2 | 37580331 | 37580436 |
| chr2 | 37640861 | 37640996 |
| chr2 | 37664281 | 37664456 |

|      |          |          |
|------|----------|----------|
| chr2 | 37668671 | 37668776 |
| chr2 | 37710051 | 37710176 |
| chr2 | 37760421 | 37760546 |
| chr2 | 37959221 | 37959396 |
| chr2 | 38358451 | 38358616 |
| chr2 | 38359751 | 38359846 |
| chr2 | 38374231 | 38374326 |
| chr2 | 38401461 | 38401606 |
| chr2 | 38443641 | 38443766 |
| chr2 | 38519481 | 38519756 |
| chr2 | 38606411 | 38606626 |
| chr2 | 38608361 | 38608486 |
| chr2 | 38644961 | 38645326 |
| chr2 | 38645971 | 38646266 |
| chr2 | 38924291 | 38924436 |
| chr2 | 39147781 | 39147936 |
| chr2 | 40850321 | 40850546 |
| chr2 | 43335921 | 43336156 |
| chr2 | 43546791 | 43546886 |
| chr2 | 44040401 | 44040566 |
| chr2 | 44121221 | 44121406 |
| chr2 | 44126701 | 44126856 |
| chr2 | 44127111 | 44127226 |
| chr2 | 44127391 | 44127516 |
| chr2 | 44127541 | 44127646 |
| chr2 | 44169771 | 44169946 |
| chr2 | 44217151 | 44217306 |
| chr2 | 44326461 | 44326576 |
| chr2 | 44390251 | 44390406 |
| chr2 | 44823821 | 44823976 |
| chr2 | 44846041 | 44846166 |
| chr2 | 44866891 | 44867056 |
| chr2 | 44867991 | 44868066 |
| chr2 | 44885371 | 44885586 |
| chr2 | 44886151 | 44886276 |
| chr2 | 44889311 | 44889476 |
| chr2 | 44917041 | 44917216 |
| chr2 | 44920111 | 44920306 |
| chr2 | 44922911 | 44923026 |
| chr2 | 44923921 | 44924036 |
| chr2 | 44926881 | 44927066 |
| chr2 | 44951491 | 44951836 |
| chr2 | 44993831 | 44994036 |
| chr2 | 45049311 | 45049476 |
| chr2 | 45191811 | 45191936 |
| chr2 | 45341701 | 45341806 |
| chr2 | 46346851 | 46347026 |
| chr2 | 46347391 | 46347576 |
| chr2 | 46624911 | 46625076 |
| chr2 | 48139741 | 48139896 |
| chr2 | 48139961 | 48140156 |
| chr2 | 48140821 | 48140996 |
| chr2 | 48141011 | 48141186 |

|      |          |          |
|------|----------|----------|
| chr2 | 48237291 | 48237556 |
| chr2 | 48246801 | 48246996 |
| chr2 | 48247501 | 48247796 |
| chr2 | 48263751 | 48263876 |
| chr2 | 48264121 | 48264216 |
| chr2 | 48264221 | 48264416 |
| chr2 | 48268331 | 48268436 |
| chr2 | 48360941 | 48361106 |
| chr2 | 48361121 | 48361426 |
| chr2 | 48420311 | 48420416 |
| chr2 | 48456681 | 48456806 |
| chr2 | 48501771 | 48501986 |
| chr2 | 48553101 | 48553186 |
| chr2 | 49094431 | 49094586 |
| chr2 | 49189611 | 49189786 |
| chr2 | 49322571 | 49322696 |
| chr2 | 49384181 | 49384316 |
| chr2 | 49433391 | 49433526 |
| chr2 | 49455291 | 49455736 |
| chr2 | 49471331 | 49471416 |
| chr2 | 49482101 | 49482206 |
| chr2 | 49501441 | 49501566 |
| chr2 | 49519871 | 49520026 |
| chr2 | 49542051 | 49542316 |
| chr2 | 49543051 | 49543246 |
| chr2 | 49544361 | 49544566 |
| chr2 | 49545041 | 49545176 |
| chr2 | 49633611 | 49633796 |
| chr2 | 49649441 | 49649646 |
| chr2 | 49682581 | 49682796 |
| chr2 | 49700231 | 49700346 |
| chr2 | 49739501 | 49739706 |
| chr2 | 49739711 | 49739856 |
| chr2 | 49740751 | 49740836 |
| chr2 | 49759801 | 49759916 |
| chr2 | 49824161 | 49824346 |
| chr2 | 49998311 | 49998496 |
| chr2 | 50095581 | 50095726 |
| chr2 | 50219421 | 50219556 |
| chr2 | 50342511 | 50342656 |
| chr2 | 50537771 | 50537876 |
| chr2 | 50538261 | 50538396 |
| chr2 | 50793771 | 50793876 |
| chr2 | 50869661 | 50869766 |
| chr2 | 50903551 | 50903666 |
| chr2 | 50904761 | 50904906 |
| chr2 | 50909581 | 50909756 |
| chr2 | 50912231 | 50912396 |
| chr2 | 50917411 | 50917616 |
| chr2 | 50959861 | 50960016 |
| chr2 | 51002031 | 51002136 |
| chr2 | 51058761 | 51058856 |
| chr2 | 51058971 | 51059086 |

|      |          |          |
|------|----------|----------|
| chr2 | 51060711 | 51060976 |
| chr2 | 51061191 | 51061326 |
| chr2 | 51149201 | 51149346 |
| chr2 | 51156511 | 51156596 |
| chr2 | 51244481 | 51244656 |
| chr2 | 51353051 | 51353236 |
| chr2 | 51353311 | 51353446 |
| chr2 | 51479941 | 51480016 |
| chr2 | 51509381 | 51509496 |
| chr2 | 51527301 | 51527396 |
| chr2 | 51574121 | 51574346 |
| chr2 | 51672671 | 51672786 |
| chr2 | 51676981 | 51677106 |
| chr2 | 51811901 | 51812016 |
| chr2 | 52189071 | 52189306 |
| chr2 | 52193571 | 52193756 |
| chr2 | 52266181 | 52266276 |
| chr2 | 52331941 | 52332096 |
| chr2 | 52332131 | 52332336 |
| chr2 | 52457791 | 52457926 |
| chr2 | 52542271 | 52542426 |
| chr2 | 52542591 | 52542796 |
| chr2 | 52749761 | 52750006 |
| chr2 | 52750121 | 52750276 |
| chr2 | 52777141 | 52777296 |
| chr2 | 52810021 | 52810126 |
| chr2 | 52851851 | 52851966 |
| chr2 | 52861031 | 52861196 |
| chr2 | 52908151 | 52908276 |
| chr2 | 53323771 | 53323906 |
| chr2 | 53324011 | 53324136 |
| chr2 | 53504831 | 53504976 |
| chr2 | 53530091 | 53530186 |
| chr2 | 53895021 | 53895136 |
| chr2 | 53954051 | 53954156 |
| chr2 | 56272141 | 56272256 |
| chr2 | 56356431 | 56356576 |
| chr2 | 56356611 | 56356846 |
| chr2 | 56384671 | 56384756 |
| chr2 | 57088021 | 57088156 |
| chr2 | 57190031 | 57190146 |
| chr2 | 57193431 | 57193546 |
| chr2 | 57428691 | 57428876 |
| chr2 | 57429941 | 57430106 |
| chr2 | 57432231 | 57432596 |
| chr2 | 57868191 | 57868356 |
| chr2 | 58105291 | 58105406 |
| chr2 | 58345401 | 58345706 |
| chr2 | 58348691 | 58348876 |
| chr2 | 58349381 | 58349526 |
| chr2 | 58364461 | 58364626 |
| chr2 | 58365061 | 58365266 |
| chr2 | 58365301 | 58365456 |

|      |          |          |
|------|----------|----------|
| chr2 | 58380501 | 58380636 |
| chr2 | 58656701 | 58656896 |
| chr2 | 58671501 | 58671666 |
| chr2 | 58764331 | 58764476 |
| chr2 | 58857671 | 58857896 |
| chr2 | 58968791 | 58968876 |
| chr2 | 58970541 | 58970706 |
| chr2 | 58976841 | 58977036 |
| chr2 | 59047771 | 59047896 |
| chr2 | 59050981 | 59051256 |
| chr2 | 59102631 | 59102796 |
| chr2 | 59114311 | 59114436 |
| chr2 | 59217731 | 59217886 |
| chr2 | 59217921 | 59218056 |
| chr2 | 59294371 | 59294526 |
| chr2 | 59344641 | 59344766 |
| chr2 | 59345061 | 59345226 |
| chr2 | 59345271 | 59345416 |
| chr2 | 59363821 | 59364046 |
| chr2 | 59394511 | 59394636 |
| chr2 | 59395071 | 59395296 |
| chr2 | 59399201 | 59399316 |
| chr2 | 59400511 | 59400666 |
| chr2 | 59400781 | 59400966 |
| chr2 | 59401111 | 59401316 |
| chr2 | 59401351 | 59401496 |
| chr2 | 59401531 | 59401676 |
| chr2 | 59466231 | 59466386 |
| chr2 | 59489761 | 59490056 |
| chr2 | 59492041 | 59492166 |
| chr2 | 59607081 | 59607206 |
| chr2 | 59631171 | 59631276 |
| chr2 | 59641121 | 59641266 |
| chr2 | 59653901 | 59654046 |
| chr2 | 59676391 | 59676536 |
| chr2 | 59679241 | 59679386 |
| chr2 | 59737221 | 59737436 |
| chr2 | 59764021 | 59764166 |
| chr2 | 59789251 | 59789366 |
| chr2 | 59828531 | 59828676 |
| chr2 | 59854501 | 59854696 |
| chr2 | 59881891 | 59882156 |
| chr2 | 59890461 | 59890616 |
| chr2 | 59891261 | 59891416 |
| chr2 | 60129261 | 60129396 |
| chr2 | 60138761 | 60139146 |
| chr2 | 60144501 | 60144626 |
| chr2 | 60447991 | 60448136 |
| chr2 | 60448531 | 60448686 |
| chr2 | 60451221 | 60451366 |
| chr2 | 60489961 | 60490076 |
| chr2 | 60493231 | 60493376 |
| chr2 | 60504331 | 60504456 |



|      |          |          |
|------|----------|----------|
| chr2 | 60514711 | 60514946 |
| chr2 | 60515251 | 60515436 |
| chr2 | 60529771 | 60529966 |
| chr2 | 60531871 | 60532036 |
| chr2 | 60587251 | 60587376 |
| chr2 | 60587401 | 60587556 |
| chr2 | 60601351 | 60601526 |
| chr2 | 60602071 | 60602336 |
| chr2 | 60610251 | 60610396 |
| chr2 | 60729951 | 60730046 |
| chr2 | 60814061 | 60814316 |
| chr2 | 60859541 | 60859666 |
| chr2 | 60947581 | 60947786 |
| chr2 | 60976031 | 60976166 |
| chr2 | 60982441 | 60982576 |
| chr2 | 61044851 | 61044956 |
| chr2 | 61202561 | 61202696 |
| chr2 | 61848371 | 61848466 |
| chr2 | 62156531 | 62156676 |
| chr2 | 62184151 | 62184246 |
| chr2 | 62432911 | 62433036 |
| chr2 | 62892911 | 62893006 |
| chr2 | 62960641 | 62960746 |
| chr2 | 63374001 | 63374076 |
| chr2 | 63376341 | 63376496 |
| chr2 | 63502721 | 63502926 |
| chr2 | 63667531 | 63667636 |
| chr2 | 63764221 | 63764436 |
| chr2 | 63771981 | 63772266 |
| chr2 | 63778051 | 63778196 |
| chr2 | 63875691 | 63875796 |
| chr2 | 63876021 | 63876116 |
| chr2 | 63880681 | 63880836 |
| chr2 | 63973381 | 63973506 |
| chr2 | 64252641 | 64252726 |
| chr2 | 64619011 | 64619206 |
| chr2 | 64975921 | 64976036 |
| chr2 | 64992231 | 64992386 |
| chr2 | 65130811 | 65130946 |
| chr2 | 65302261 | 65302386 |
| chr2 | 65353501 | 65353616 |
| chr2 | 65417131 | 65417236 |
| chr2 | 65422351 | 65422486 |
| chr2 | 65684651 | 65684766 |
| chr2 | 65721721 | 65721866 |
| chr2 | 65730961 | 65731176 |
| chr2 | 65756131 | 65756296 |
| chr2 | 65829691 | 65829866 |
| chr2 | 65831411 | 65831576 |
| chr2 | 65831681 | 65831856 |
| chr2 | 65901411 | 65901556 |
| chr2 | 65904651 | 65904796 |
| chr2 | 65905071 | 65905136 |

|      |          |          |
|------|----------|----------|
| chr2 | 66397181 | 66397296 |
| chr2 | 67950931 | 67951216 |
| chr2 | 68011101 | 68011266 |
| chr2 | 68046301 | 68046526 |
| chr2 | 68146361 | 68146486 |
| chr2 | 68205551 | 68205746 |
| chr2 | 68207521 | 68207886 |
| chr2 | 68208551 | 68208806 |
| chr2 | 68210681 | 68210816 |
| chr2 | 68595461 | 68595656 |
| chr2 | 68607281 | 68607596 |
| chr2 | 68607611 | 68607676 |
| chr2 | 68664541 | 68664706 |
| chr2 | 68687711 | 68687846 |
| chr2 | 68733591 | 68733716 |
| chr2 | 68779141 | 68779316 |
| chr2 | 68779531 | 68779606 |
| chr2 | 68779791 | 68779996 |
| chr2 | 68783001 | 68783176 |
| chr2 | 68872611 | 68872736 |
| chr2 | 68929251 | 68929346 |
| chr2 | 68933601 | 68933746 |
| chr2 | 68935781 | 68936166 |
| chr2 | 68945861 | 68946016 |
| chr2 | 68963441 | 68963536 |
| chr2 | 68970191 | 68970326 |
| chr2 | 68971271 | 68971416 |
| chr2 | 69015131 | 69015256 |
| chr2 | 69023791 | 69023906 |
| chr2 | 69027671 | 69027786 |
| chr2 | 69029601 | 69029746 |
| chr2 | 69049491 | 69049586 |
| chr2 | 69078661 | 69078816 |
| chr2 | 69122391 | 69122516 |
| chr2 | 69128101 | 69128246 |
| chr2 | 69196891 | 69197016 |
| chr2 | 69225821 | 69225916 |
| chr2 | 69344921 | 69345016 |
| chr2 | 69360971 | 69361056 |
| chr2 | 69367221 | 69367336 |
| chr2 | 69371431 | 69371636 |
| chr2 | 69430061 | 69430206 |
| chr2 | 69430241 | 69430446 |
| chr2 | 69484041 | 69484146 |
| chr2 | 69628981 | 69629356 |
| chr2 | 69835951 | 69836096 |
| chr2 | 69839951 | 69840146 |
| chr2 | 69906191 | 69906756 |
| chr2 | 69960481 | 69960616 |
| chr2 | 70002571 | 70002726 |
| chr2 | 70085471 | 70085596 |
| chr2 | 70093501 | 70093666 |
| chr2 | 70542991 | 70543116 |

|      |          |          |
|------|----------|----------|
| chr2 | 70611501 | 70611636 |
| chr2 | 70774111 | 70774176 |
| chr2 | 70790251 | 70790466 |
| chr2 | 70982921 | 70983096 |
| chr2 | 70992581 | 70992766 |
| chr2 | 71128511 | 71128626 |
| chr2 | 71304491 | 71304626 |
| chr2 | 71427481 | 71427766 |
| chr2 | 71427791 | 71428016 |
| chr2 | 71428131 | 71428266 |
| chr2 | 71448321 | 71448506 |
| chr2 | 71453061 | 71453186 |
| chr2 | 71469851 | 71469996 |
| chr2 | 71498491 | 71498626 |
| chr2 | 71499871 | 71500076 |
| chr2 | 71519851 | 71520206 |
| chr2 | 71532711 | 71532826 |
| chr2 | 71535871 | 71536096 |
| chr2 | 71540551 | 71540676 |
| chr2 | 71550331 | 71550586 |
| chr2 | 71550821 | 71551136 |
| chr2 | 71551141 | 71551316 |
| chr2 | 71559591 | 71559826 |
| chr2 | 71576151 | 71576256 |
| chr2 | 71595481 | 71595636 |
| chr2 | 71606781 | 71606876 |
| chr2 | 71612051 | 71612196 |
| chr2 | 71615261 | 71615436 |
| chr2 | 71615741 | 71615866 |
| chr2 | 71625021 | 71625176 |
| chr2 | 71697871 | 71698136 |
| chr2 | 71698391 | 71698616 |
| chr2 | 71720021 | 71720306 |
| chr2 | 71847421 | 71847526 |
| chr2 | 71876031 | 71876206 |
| chr2 | 71908321 | 71908476 |
| chr2 | 71918461 | 71918576 |
| chr2 | 71946991 | 71947196 |
| chr2 | 71958581 | 71958706 |
| chr2 | 71961161 | 71961336 |
| chr2 | 71974831 | 71975016 |
| chr2 | 72227121 | 72227316 |
| chr2 | 72227861 | 72228046 |
| chr2 | 72292581 | 72292786 |
| chr2 | 72307911 | 72308196 |
| chr2 | 72309221 | 72309466 |
| chr2 | 72474261 | 72474406 |
| chr2 | 72509401 | 72509516 |
| chr2 | 72542101 | 72542216 |
| chr2 | 72642691 | 72642816 |
| chr2 | 73124111 | 73124296 |
| chr2 | 73152521 | 73152656 |
| chr2 | 73229801 | 73229986 |

|      |          |          |
|------|----------|----------|
| chr2 | 73460881 | 73460986 |
| chr2 | 73461131 | 73461256 |
| chr2 | 73753311 | 73753496 |
| chr2 | 73767611 | 73767736 |
| chr2 | 73792691 | 73792976 |
| chr2 | 73920061 | 73920246 |
| chr2 | 73920531 | 73920736 |
| chr2 | 73920911 | 73921066 |
| chr2 | 73930101 | 73930256 |
| chr2 | 73930741 | 73930866 |
| chr2 | 73930911 | 73930996 |
| chr2 | 74000851 | 74000986 |
| chr2 | 74058051 | 74058206 |
| chr2 | 74099251 | 74099386 |
| chr2 | 74227521 | 74228036 |
| chr2 | 74251491 | 74251596 |
| chr2 | 74448421 | 74448546 |
| chr2 | 74515941 | 74516116 |
| chr2 | 74525571 | 74525686 |
| chr2 | 74526161 | 74526416 |
| chr2 | 74532291 | 74532456 |
| chr2 | 74538361 | 74538436 |
| chr2 | 74539451 | 74539906 |
| chr2 | 74541321 | 74541996 |
| chr2 | 74562691 | 74563026 |
| chr2 | 74586731 | 74586956 |
| chr2 | 74719111 | 74719226 |
| chr2 | 74728561 | 74728696 |
| chr2 | 74771861 | 74772016 |
| chr2 | 74822851 | 74822956 |
| chr2 | 74861561 | 74861726 |
| chr2 | 74861821 | 74861946 |
| chr2 | 74862021 | 74862126 |
| chr2 | 74891471 | 74891556 |
| chr2 | 74915361 | 74915496 |
| chr2 | 75010781 | 75010896 |
| chr2 | 75011071 | 75011386 |
| chr2 | 75041421 | 75041576 |
| chr2 | 75045251 | 75045386 |
| chr2 | 75045581 | 75045766 |
| chr2 | 75070411 | 75070556 |
| chr2 | 75116291 | 75116366 |
| chr2 | 75117301 | 75117526 |
| chr2 | 75186531 | 75186626 |
| chr2 | 75200841 | 75200976 |
| chr2 | 75224861 | 75225006 |
| chr2 | 75225331 | 75225546 |
| chr2 | 75225841 | 75226176 |
| chr2 | 75226431 | 75226626 |
| chr2 | 75226731 | 75226926 |
| chr2 | 75239291 | 75239396 |
| chr2 | 75252851 | 75253006 |
| chr2 | 75263121 | 75263266 |

|      |          |          |
|------|----------|----------|
| chr2 | 75282741 | 75282896 |
| chr2 | 75311121 | 75311316 |
| chr2 | 75338771 | 75338906 |
| chr2 | 75414291 | 75414356 |
| chr2 | 75494071 | 75494236 |
| chr2 | 75496761 | 75497046 |
| chr2 | 75506101 | 75506256 |
| chr2 | 75724941 | 75725146 |
| chr2 | 75726551 | 75726726 |
| chr2 | 75726741 | 75726856 |
| chr2 | 75760221 | 75760496 |
| chr2 | 75786821 | 75787026 |
| chr2 | 75789481 | 75789596 |
| chr2 | 75792961 | 75793086 |
| chr2 | 75798641 | 75799186 |
| chr2 | 75799681 | 75799786 |
| chr2 | 75800541 | 75800896 |
| chr2 | 75801341 | 75801456 |
| chr2 | 75803691 | 75804176 |
| chr2 | 75806741 | 75806926 |
| chr2 | 75814801 | 75814936 |
| chr2 | 75817811 | 75818006 |
| chr2 | 75831091 | 75831196 |
| chr2 | 75854711 | 75854916 |
| chr2 | 75854941 | 75855116 |
| chr2 | 75858531 | 75858686 |
| chr2 | 75859251 | 75859366 |
| chr2 | 75859661 | 75859896 |
| chr2 | 75864361 | 75864496 |
| chr2 | 75869141 | 75869296 |
| chr2 | 75870121 | 75870256 |
| chr2 | 75878691 | 75879066 |
| chr2 | 75899091 | 75899266 |
| chr2 | 75899301 | 75899606 |
| chr2 | 75902711 | 75902966 |
| chr2 | 75908131 | 75908236 |
| chr2 | 75946501 | 75946666 |
| chr2 | 76021341 | 76021486 |
| chr2 | 76224801 | 76224896 |
| chr2 | 76243551 | 76243666 |
| chr2 | 76325621 | 76325776 |
| chr2 | 76336901 | 76337036 |
| chr2 | 76365561 | 76365716 |
| chr2 | 76399171 | 76399296 |
| chr2 | 76483411 | 76483566 |
| chr2 | 76489081 | 76489366 |
| chr2 | 76500651 | 76500766 |
| chr2 | 76500841 | 76500966 |
| chr2 | 76607881 | 76608026 |
| chr2 | 76784581 | 76784686 |
| chr2 | 76857191 | 76857406 |
| chr2 | 76954931 | 76955056 |
| chr2 | 76973051 | 76973226 |

|      |          |          |
|------|----------|----------|
| chr2 | 76999191 | 76999326 |
| chr2 | 77047071 | 77047236 |
| chr2 | 77051421 | 77051596 |
| chr2 | 77176231 | 77176396 |
| chr2 | 77219201 | 77219506 |
| chr2 | 77273341 | 77273626 |
| chr2 | 77290611 | 77290706 |
| chr2 | 77313691 | 77313806 |
| chr2 | 77320381 | 77320536 |
| chr2 | 77448541 | 77448736 |
| chr2 | 77482721 | 77482826 |
| chr2 | 77489741 | 77489996 |
| chr2 | 77491271 | 77491406 |
| chr2 | 77492871 | 77492976 |
| chr2 | 77566371 | 77566526 |
| chr2 | 77578241 | 77578446 |
| chr2 | 77578771 | 77578996 |
| chr2 | 77590841 | 77590966 |
| chr2 | 77627391 | 77627576 |
| chr2 | 77642501 | 77642626 |
| chr2 | 77735361 | 77735486 |
| chr2 | 77762551 | 77762696 |
| chr2 | 77865231 | 77865476 |
| chr2 | 77897661 | 77897776 |
| chr2 | 78457181 | 78457266 |
| chr2 | 78761971 | 78762126 |
| chr2 | 78839701 | 78839916 |
| chr2 | 78938781 | 78938956 |
| chr2 | 79179351 | 79179446 |
| chr2 | 79376051 | 79376186 |
| chr2 | 79412141 | 79412256 |
| chr2 | 79462431 | 79462626 |
| chr2 | 79698711 | 79698836 |
| chr2 | 79927791 | 79927946 |
| chr2 | 79929781 | 79930016 |
| chr2 | 80197071 | 80197186 |
| chr2 | 80236381 | 80236456 |
| chr2 | 80944541 | 80944736 |
| chr2 | 81435241 | 81435436 |
| chr2 | 82423931 | 82424066 |
| chr2 | 83411581 | 83411786 |
| chr2 | 83493611 | 83493806 |
| chr2 | 83495011 | 83495126 |
| chr2 | 83511041 | 83511166 |
| chr2 | 83511211 | 83511356 |
| chr2 | 83515651 | 83515836 |
| chr2 | 83560101 | 83560386 |
| chr2 | 83584401 | 83584496 |
| chr2 | 83598801 | 83598966 |
| chr2 | 83599091 | 83599246 |
| chr2 | 83599371 | 83599636 |
| chr2 | 83611781 | 83611926 |
| chr2 | 83614981 | 83615086 |

|      |          |          |
|------|----------|----------|
| chr2 | 83622571 | 83622686 |
| chr2 | 83985601 | 83985786 |
| chr2 | 84061681 | 84061796 |
| chr2 | 84067071 | 84067206 |
| chr2 | 84188111 | 84188246 |
| chr2 | 84192541 | 84192666 |
| chr2 | 84265921 | 84266066 |
| chr2 | 84276841 | 84277046 |
| chr2 | 84320481 | 84320576 |
| chr2 | 84352481 | 84352576 |
| chr2 | 84427521 | 84427746 |
| chr2 | 84576331 | 84576536 |
| chr2 | 84940971 | 84941166 |
| chr2 | 84998961 | 84999476 |
| chr2 | 90291691 | 90291796 |
| chr2 | 90337471 | 90337586 |
| chr2 | 90847871 | 90847966 |
| chr2 | 91129041 | 91129116 |
| chr2 | 91263551 | 91263776 |
| chr2 | 91263881 | 91263976 |
| chr2 | 91276761 | 91276866 |
| chr2 | 91276881 | 91276976 |
| chr2 | 91660391 | 91660546 |
| chr2 | 91705471 | 91705626 |
| chr2 | 91737561 | 91737816 |
| chr2 | 91751101 | 91751226 |
| chr2 | 91781031 | 91781176 |
| chr2 | 91916261 | 91916426 |
| chr2 | 92238401 | 92238536 |
| chr2 | 92476211 | 92476306 |
| chr2 | 92645931 | 92646046 |
| chr2 | 92646401 | 92646546 |
| chr2 | 92672221 | 92672336 |
| chr2 | 92748271 | 92748356 |
| chr2 | 92749141 | 92749286 |
| chr2 | 92749341 | 92749496 |
| chr2 | 92749951 | 92750026 |
| chr2 | 92900431 | 92900586 |
| chr2 | 93027601 | 93027696 |
| chr2 | 93114741 | 93114896 |
| chr2 | 93255241 | 93255526 |
| chr2 | 93289731 | 93290216 |
| chr2 | 93425991 | 93426136 |
| chr2 | 93463231 | 93463366 |
| chr2 | 93463521 | 93463796 |
| chr2 | 93530391 | 93530616 |
| chr2 | 93541561 | 93541766 |
| chr2 | 93546021 | 93546196 |
| chr2 | 93559951 | 93560106 |
| chr2 | 93985141 | 93985406 |
| chr2 | 94089121 | 94089226 |
| chr2 | 94565851 | 94565976 |
| chr2 | 95033401 | 95033556 |

|      |           |           |
|------|-----------|-----------|
| chr2 | 96509321  | 96509416  |
| chr2 | 101393101 | 101393416 |
| chr2 | 101438781 | 101438936 |
| chr2 | 101630961 | 101631076 |
| chr2 | 101692051 | 101692396 |
| chr2 | 101756611 | 101756766 |
| chr2 | 101757251 | 101757386 |
| chr2 | 101768171 | 101768556 |
| chr2 | 101804401 | 101804556 |
| chr2 | 101806641 | 101806776 |
| chr2 | 101837781 | 101837896 |
| chr2 | 101839111 | 101839356 |
| chr2 | 101849751 | 101849916 |
| chr2 | 101850761 | 101850876 |
| chr2 | 101929851 | 101929996 |
| chr2 | 101938691 | 101938826 |
| chr2 | 101943751 | 101943896 |
| chr2 | 101955331 | 101955446 |
| chr2 | 102006691 | 102006866 |
| chr2 | 102024301 | 102024456 |
| chr2 | 102024581 | 102024736 |
| chr2 | 102027391 | 102027556 |
| chr2 | 102208391 | 102208506 |
| chr2 | 102258901 | 102259016 |
| chr2 | 102456921 | 102457046 |
| chr2 | 102470551 | 102470736 |
| chr2 | 102470761 | 102470926 |
| chr2 | 102537211 | 102537346 |
| chr2 | 102546571 | 102546736 |
| chr2 | 102742301 | 102742466 |
| chr2 | 103127961 | 103128086 |
| chr2 | 103149191 | 103149366 |
| chr2 | 103214451 | 103214606 |
| chr2 | 103240821 | 103241106 |
| chr2 | 103381921 | 103382096 |
| chr2 | 103382431 | 103382626 |
| chr2 | 103423851 | 103424116 |
| chr2 | 103426081 | 103426386 |
| chr2 | 103426671 | 103426846 |
| chr2 | 103460981 | 103461136 |
| chr2 | 103491451 | 103491586 |
| chr2 | 103504921 | 103505046 |
| chr2 | 103692241 | 103692396 |
| chr2 | 103695261 | 103695386 |
| chr2 | 103737261 | 103737506 |
| chr2 | 104020631 | 104020736 |
| chr2 | 104114041 | 104114146 |
| chr2 | 104126341 | 104126496 |
| chr2 | 104373691 | 104373886 |
| chr2 | 104405701 | 104405866 |
| chr2 | 104506091 | 104506206 |
| chr2 | 104544281 | 104544416 |
| chr2 | 104836821 | 104837036 |



|      |           |           |
|------|-----------|-----------|
| chr2 | 104921221 | 104921386 |
| chr2 | 104942371 | 104942506 |
| chr2 | 105001161 | 105001386 |
| chr2 | 105007581 | 105007856 |
| chr2 | 105007971 | 105008176 |
| chr2 | 105011161 | 105011376 |
| chr2 | 105036391 | 105036526 |
| chr2 | 105043841 | 105043986 |
| chr2 | 105112861 | 105112996 |
| chr2 | 105137281 | 105137416 |
| chr2 | 105137481 | 105137926 |
| chr2 | 105149841 | 105149966 |
| chr2 | 105323011 | 105323186 |
| chr2 | 105412921 | 105413126 |
| chr2 | 105413201 | 105413486 |
| chr2 | 105493941 | 105494086 |
| chr2 | 105521081 | 105521206 |
| chr2 | 105887111 | 105887346 |
| chr2 | 105983151 | 105983416 |
| chr2 | 105996121 | 105996256 |
| chr2 | 106336691 | 106336856 |
| chr2 | 106521661 | 106521776 |
| chr2 | 106547841 | 106547966 |
| chr2 | 106555701 | 106555776 |
| chr2 | 106557021 | 106557196 |
| chr2 | 106557201 | 106557466 |
| chr2 | 106557621 | 106557806 |
| chr2 | 106558321 | 106558476 |
| chr2 | 106570361 | 106570516 |
| chr2 | 106572881 | 106573026 |
| chr2 | 106575011 | 106575256 |
| chr2 | 106575421 | 106575786 |
| chr2 | 106598791 | 106598936 |
| chr2 | 106599681 | 106599806 |
| chr2 | 106616431 | 106616566 |
| chr2 | 106622311 | 106622436 |
| chr2 | 106629821 | 106630216 |
| chr2 | 106637491 | 106637646 |
| chr2 | 106645851 | 106645956 |
| chr2 | 106650411 | 106650506 |
| chr2 | 106650531 | 106650706 |
| chr2 | 106655581 | 106655886 |
| chr2 | 106656051 | 106656326 |
| chr2 | 106656901 | 106657306 |
| chr2 | 106657611 | 106657776 |
| chr2 | 106662251 | 106662496 |
| chr2 | 106663941 | 106664096 |
| chr2 | 106667741 | 106667896 |
| chr2 | 106684301 | 106684476 |
| chr2 | 106684681 | 106684816 |
| chr2 | 108037251 | 108037376 |
| chr2 | 108492211 | 108492296 |
| chr2 | 108628261 | 108628696 |

|      |           |           |
|------|-----------|-----------|
| chr2 | 108850611 | 108850726 |
| chr2 | 109422601 | 109422766 |
| chr2 | 109737551 | 109737786 |
| chr2 | 109742961 | 109743116 |
| chr2 | 109745351 | 109745456 |
| chr2 | 109770801 | 109770996 |
| chr2 | 109787511 | 109787766 |
| chr2 | 109790721 | 109790886 |
| chr2 | 109793411 | 109793556 |
| chr2 | 109797361 | 109797596 |
| chr2 | 109801811 | 109801926 |
| chr2 | 109968771 | 109968836 |
| chr2 | 109974601 | 109974916 |
| chr2 | 109980751 | 109981316 |
| chr2 | 109987261 | 109987436 |
| chr2 | 109992131 | 109992256 |
| chr2 | 109992851 | 109993176 |
| chr2 | 112418011 | 112418186 |
| chr2 | 113241171 | 113241376 |
| chr2 | 113241481 | 113241616 |
| chr2 | 113377151 | 113377316 |
| chr2 | 113607581 | 113607726 |
| chr2 | 113619191 | 113619326 |
| chr2 | 113624261 | 113624396 |
| chr2 | 113799121 | 113799296 |
| chr2 | 113799441 | 113799576 |
| chr2 | 113952731 | 113952916 |
| chr2 | 114291431 | 114291626 |
| chr2 | 114469931 | 114470086 |
| chr2 | 114782081 | 114782296 |
| chr2 | 115029771 | 115029876 |
| chr2 | 115068831 | 115068926 |
| chr2 | 115071671 | 115071786 |
| chr2 | 115071831 | 115071946 |
| chr2 | 115076331 | 115076456 |
| chr2 | 115083251 | 115083386 |
| chr2 | 115085351 | 115085486 |
| chr2 | 115085971 | 115086116 |
| chr2 | 115108981 | 115109136 |
| chr2 | 115109261 | 115109466 |
| chr2 | 115110171 | 115110306 |
| chr2 | 115184491 | 115184646 |
| chr2 | 115201071 | 115201426 |
| chr2 | 115204391 | 115204546 |
| chr2 | 115205401 | 115205586 |
| chr2 | 115270961 | 115271266 |
| chr2 | 115288641 | 115288806 |
| chr2 | 115292281 | 115292476 |
| chr2 | 115293611 | 115293856 |
| chr2 | 115322551 | 115322916 |
| chr2 | 115348321 | 115348566 |
| chr2 | 115378281 | 115378446 |
| chr2 | 115379861 | 115379976 |

|      |           |           |
|------|-----------|-----------|
| chr2 | 115393141 | 115393306 |
| chr2 | 115394031 | 115394306 |
| chr2 | 115395261 | 115395386 |
| chr2 | 115398351 | 115398506 |
| chr2 | 115415751 | 115415956 |
| chr2 | 115449241 | 115449506 |
| chr2 | 115450211 | 115450326 |
| chr2 | 115468421 | 115468516 |
| chr2 | 115477281 | 115477466 |
| chr2 | 115499941 | 115500096 |
| chr2 | 115505021 | 115505176 |
| chr2 | 115544131 | 115544216 |
| chr2 | 115560791 | 115560916 |
| chr2 | 115567621 | 115567746 |
| chr2 | 115600861 | 115600956 |
| chr2 | 115607651 | 115607736 |
| chr2 | 115614901 | 115615076 |
| chr2 | 115634581 | 115634686 |
| chr2 | 115689171 | 115689386 |
| chr2 | 115693241 | 115693436 |
| chr2 | 115701991 | 115702146 |
| chr2 | 115710721 | 115710856 |
| chr2 | 115711521 | 115711686 |
| chr2 | 115713281 | 115713406 |
| chr2 | 115736551 | 115736816 |
| chr2 | 115738971 | 115739066 |
| chr2 | 115739081 | 115739206 |
| chr2 | 115747441 | 115747616 |
| chr2 | 115750201 | 115750336 |
| chr2 | 115787451 | 115787646 |
| chr2 | 116451271 | 116451426 |
| chr2 | 116460001 | 116460166 |
| chr2 | 116510941 | 116511036 |
| chr2 | 116663851 | 116664016 |
| chr2 | 117131401 | 117131536 |
| chr2 | 117344521 | 117344716 |
| chr2 | 117569511 | 117569576 |
| chr2 | 117619771 | 117619856 |
| chr2 | 117728841 | 117729186 |
| chr2 | 117802141 | 117802296 |
| chr2 | 117851961 | 117852156 |
| chr2 | 117854061 | 117854286 |
| chr2 | 117900231 | 117900366 |
| chr2 | 118224651 | 118224806 |
| chr2 | 118231291 | 118231426 |
| chr2 | 118232381 | 118232566 |
| chr2 | 118302781 | 118302896 |
| chr2 | 118353551 | 118353746 |
| chr2 | 118543311 | 118543466 |
| chr2 | 118710181 | 118710606 |
| chr2 | 119677471 | 119677656 |
| chr2 | 119845081 | 119845216 |
| chr2 | 120736701 | 120736866 |

|      |           |           |
|------|-----------|-----------|
| chr2 | 121044701 | 121044886 |
| chr2 | 121175211 | 121175436 |
| chr2 | 121267481 | 121267596 |
| chr2 | 121270461 | 121270666 |
| chr2 | 121300181 | 121300326 |
| chr2 | 121301621 | 121302046 |
| chr2 | 121302201 | 121302366 |
| chr2 | 121548591 | 121548696 |
| chr2 | 122597521 | 122597646 |
| chr2 | 123762931 | 123763056 |
| chr2 | 123926681 | 123926806 |
| chr2 | 123926831 | 123926976 |
| chr2 | 124197861 | 124197996 |
| chr2 | 124303861 | 124304006 |
| chr2 | 124304231 | 124304366 |
| chr2 | 124305161 | 124305236 |
| chr2 | 124416591 | 124416736 |
| chr2 | 124640221 | 124640386 |
| chr2 | 124784891 | 124784956 |
| chr2 | 124842771 | 124842956 |
| chr2 | 125146391 | 125146526 |
| chr2 | 125183771 | 125183906 |
| chr2 | 125184161 | 125184346 |
| chr2 | 125312031 | 125312126 |
| chr2 | 125312231 | 125312386 |
| chr2 | 125622791 | 125622916 |
| chr2 | 125629161 | 125629266 |
| chr2 | 125706371 | 125706506 |
| chr2 | 125706531 | 125706656 |
| chr2 | 126052631 | 126052756 |
| chr2 | 127410661 | 127410796 |
| chr2 | 127619771 | 127620036 |
| chr2 | 127723871 | 127723996 |
| chr2 | 127778021 | 127778176 |
| chr2 | 127866191 | 127866276 |
| chr2 | 127871511 | 127871656 |
| chr2 | 128055441 | 128055566 |
| chr2 | 128056801 | 128056936 |
| chr2 | 128164421 | 128164556 |
| chr2 | 128420661 | 128420816 |
| chr2 | 128507041 | 128507256 |
| chr2 | 128507271 | 128507446 |
| chr2 | 128896171 | 128896346 |
| chr2 | 129221081 | 129221296 |
| chr2 | 129221341 | 129221526 |
| chr2 | 129241051 | 129241216 |
| chr2 | 129295681 | 129295776 |
| chr2 | 129585011 | 129585206 |
| chr2 | 129653001 | 129653166 |
| chr2 | 130207431 | 130207556 |
| chr2 | 130924881 | 130925036 |
| chr2 | 130952021 | 130952166 |
| chr2 | 131448771 | 131448896 |

|      |           |           |
|------|-----------|-----------|
| chr2 | 131453291 | 131453426 |
| chr2 | 131693221 | 131693386 |
| chr2 | 131790571 | 131790766 |
| chr2 | 131796921 | 131797016 |
| chr2 | 131841331 | 131841436 |
| chr2 | 131844331 | 131844446 |
| chr2 | 131924091 | 131924276 |
| chr2 | 131925551 | 131925746 |
| chr2 | 131925801 | 131926136 |
| chr2 | 131964321 | 131964486 |
| chr2 | 131987121 | 131987416 |
| chr2 | 132198621 | 132198906 |
| chr2 | 132389131 | 132389266 |
| chr2 | 132389381 | 132389646 |
| chr2 | 132406981 | 132407066 |
| chr2 | 132417081 | 132417196 |
| chr2 | 132576241 | 132576426 |
| chr2 | 132874721 | 132874986 |
| chr2 | 133023481 | 133023636 |
| chr2 | 133037751 | 133037886 |
| chr2 | 133175451 | 133175586 |
| chr2 | 133175631 | 133175736 |
| chr2 | 133238751 | 133238876 |
| chr2 | 133322581 | 133322706 |
| chr2 | 133407881 | 133408036 |
| chr2 | 133418781 | 133418886 |
| chr2 | 133418991 | 133419156 |
| chr2 | 133453081 | 133453216 |
| chr2 | 133695041 | 133695166 |
| chr2 | 134517201 | 134517416 |
| chr2 | 134544811 | 134544946 |
| chr2 | 134602371 | 134602526 |
| chr2 | 134622181 | 134622316 |
| chr2 | 134681311 | 134681426 |
| chr2 | 134743411 | 134743606 |
| chr2 | 134831991 | 134832276 |
| chr2 | 134832301 | 134832426 |
| chr2 | 134832541 | 134832716 |
| chr2 | 134843651 | 134843896 |
| chr2 | 135425861 | 135426036 |
| chr2 | 135441751 | 135441976 |
| chr2 | 135442201 | 135442536 |
| chr2 | 135443601 | 135443796 |
| chr2 | 135557961 | 135558116 |
| chr2 | 135612101 | 135612236 |
| chr2 | 135619531 | 135619686 |
| chr2 | 135631111 | 135631276 |
| chr2 | 135631471 | 135631606 |
| chr2 | 135813421 | 135813606 |
| chr2 | 136202581 | 136202716 |
| chr2 | 136362351 | 136362466 |
| chr2 | 136364581 | 136364686 |
| chr2 | 136401561 | 136401696 |

|      |           |           |
|------|-----------|-----------|
| chr2 | 136438601 | 136438706 |
| chr2 | 136765581 | 136765796 |
| chr2 | 136771341 | 136771466 |
| chr2 | 136781891 | 136782066 |
| chr2 | 136784501 | 136784676 |
| chr2 | 136789141 | 136789396 |
| chr2 | 136844611 | 136844786 |
| chr2 | 136844831 | 136845076 |
| chr2 | 136855451 | 136855546 |
| chr2 | 136866601 | 136866726 |
| chr2 | 136866771 | 136867026 |
| chr2 | 137396451 | 137396636 |
| chr2 | 137630631 | 137630776 |
| chr2 | 137897111 | 137897206 |
| chr2 | 137972041 | 137972206 |
| chr2 | 137981671 | 137981796 |
| chr2 | 138029631 | 138029836 |
| chr2 | 139300421 | 139300806 |
| chr2 | 139399131 | 139399236 |
| chr2 | 140346201 | 140346326 |
| chr2 | 140346661 | 140346806 |
| chr2 | 140370241 | 140370366 |
| chr2 | 140395921 | 140396176 |
| chr2 | 140531001 | 140531116 |
| chr2 | 140663661 | 140663796 |
| chr2 | 140697911 | 140698026 |
| chr2 | 140839121 | 140839346 |
| chr2 | 140922531 | 140922686 |
| chr2 | 140977741 | 140977816 |
| chr2 | 141035801 | 141035896 |
| chr2 | 141491141 | 141491376 |
| chr2 | 141550441 | 141550576 |
| chr2 | 141807671 | 141807866 |
| chr2 | 142124761 | 142124866 |
| chr2 | 142281441 | 142281636 |
| chr2 | 142488911 | 142489006 |
| chr2 | 142672351 | 142672436 |
| chr2 | 142781371 | 142781506 |
| chr2 | 143332841 | 143333006 |
| chr2 | 143333161 | 143333476 |
| chr2 | 143443991 | 143444136 |
| chr2 | 143498141 | 143498266 |
| chr2 | 143764151 | 143764316 |
| chr2 | 143849721 | 143849836 |
| chr2 | 143851421 | 143851626 |
| chr2 | 143886571 | 143886686 |
| chr2 | 143907131 | 143907246 |
| chr2 | 143977071 | 143977256 |
| chr2 | 143983441 | 143983586 |
| chr2 | 144127181 | 144127316 |
| chr2 | 144483271 | 144483436 |
| chr2 | 145088311 | 145088516 |
| chr2 | 145089371 | 145089456 |

|      |           |           |
|------|-----------|-----------|
| chr2 | 145089641 | 145089786 |
| chr2 | 145096331 | 145096466 |
| chr2 | 145148591 | 145148726 |
| chr2 | 145303711 | 145303856 |
| chr2 | 145303891 | 145304066 |
| chr2 | 145312681 | 145312976 |
| chr2 | 145344151 | 145344326 |
| chr2 | 145376321 | 145376466 |
| chr2 | 145405801 | 145405986 |
| chr2 | 145439371 | 145439536 |
| chr2 | 145461671 | 145461846 |
| chr2 | 145474991 | 145475116 |
| chr2 | 145476041 | 145476186 |
| chr2 | 145479071 | 145479226 |
| chr2 | 145479371 | 145479476 |
| chr2 | 145641881 | 145641986 |
| chr2 | 145707211 | 145707366 |
| chr2 | 145781431 | 145781546 |
| chr2 | 145832331 | 145832446 |
| chr2 | 145861011 | 145861176 |
| chr2 | 145951781 | 145951916 |
| chr2 | 145970991 | 145971196 |
| chr2 | 146006271 | 146006536 |
| chr2 | 146015281 | 146015446 |
| chr2 | 146016401 | 146016696 |
| chr2 | 146018851 | 146019016 |
| chr2 | 146022151 | 146022456 |
| chr2 | 146057631 | 146057896 |
| chr2 | 146402081 | 146402236 |
| chr2 | 146402251 | 146402356 |
| chr2 | 146414141 | 146414276 |
| chr2 | 146416801 | 146416896 |
| chr2 | 146998061 | 146998206 |
| chr2 | 146998251 | 146998346 |
| chr2 | 146998691 | 146998896 |
| chr2 | 147522081 | 147522186 |
| chr2 | 147568131 | 147568476 |
| chr2 | 147568491 | 147568696 |
| chr2 | 147568701 | 147569056 |
| chr2 | 147569491 | 147569636 |
| chr2 | 147569931 | 147570096 |
| chr2 | 147577891 | 147578006 |
| chr2 | 147596921 | 147597096 |
| chr2 | 147597841 | 147598216 |
| chr2 | 147598861 | 147599026 |
| chr2 | 147641051 | 147641216 |
| chr2 | 147653181 | 147653326 |
| chr2 | 147660041 | 147660236 |
| chr2 | 147660341 | 147660486 |
| chr2 | 147676181 | 147676416 |
| chr2 | 147683821 | 147683966 |
| chr2 | 147696701 | 147696866 |
| chr2 | 147714731 | 147715206 |

|      |           |           |
|------|-----------|-----------|
| chr2 | 147715811 | 147715986 |
| chr2 | 147720861 | 147721096 |
| chr2 | 147769571 | 147769666 |
| chr2 | 149487671 | 149487816 |
| chr2 | 149705311 | 149705416 |
| chr2 | 150341431 | 150341706 |
| chr2 | 150358321 | 150358526 |
| chr2 | 150427151 | 150427316 |
| chr2 | 150427851 | 150428026 |
| chr2 | 150532471 | 150532616 |
| chr2 | 151320831 | 151320986 |
| chr2 | 151592621 | 151592916 |
| chr2 | 151607731 | 151607926 |
| chr2 | 151651631 | 151651896 |
| chr2 | 151812331 | 151812476 |
| chr2 | 152150841 | 152151236 |
| chr2 | 152231011 | 152231106 |
| chr2 | 152325191 | 152325316 |
| chr2 | 152365701 | 152365916 |
| chr2 | 152390531 | 152390686 |
| chr2 | 152409081 | 152409236 |
| chr2 | 152456161 | 152456416 |
| chr2 | 152477251 | 152477416 |
| chr2 | 152519721 | 152519926 |
| chr2 | 152643361 | 152643636 |
| chr2 | 152758641 | 152758766 |
| chr2 | 153117631 | 153117726 |
| chr2 | 153124121 | 153124416 |
| chr2 | 153146751 | 153146886 |
| chr2 | 153185921 | 153186066 |
| chr2 | 153188511 | 153188666 |
| chr2 | 153343851 | 153343986 |
| chr2 | 153344931 | 153345086 |
| chr2 | 154026661 | 154026756 |
| chr2 | 154066801 | 154066936 |
| chr2 | 154441331 | 154441456 |
| chr2 | 154674841 | 154675036 |
| chr2 | 154711801 | 154711926 |
| chr2 | 154766341 | 154766456 |
| chr2 | 155061051 | 155061216 |
| chr2 | 155321041 | 155321196 |
| chr2 | 155499051 | 155499146 |
| chr2 | 155563231 | 155563336 |
| chr2 | 155584591 | 155584776 |
| chr2 | 155585571 | 155585716 |
| chr2 | 155633881 | 155634166 |
| chr2 | 155640911 | 155641266 |
| chr2 | 155641371 | 155641466 |
| chr2 | 156131541 | 156131676 |
| chr2 | 156331181 | 156331336 |
| chr2 | 156375601 | 156375736 |
| chr2 | 156376261 | 156376486 |
| chr2 | 156413921 | 156414016 |



|      |           |           |
|------|-----------|-----------|
| chr2 | 156428361 | 156428676 |
| chr2 | 156505791 | 156505956 |
| chr2 | 156505971 | 156506126 |
| chr2 | 156757281 | 156757406 |
| chr2 | 156760131 | 156760256 |
| chr2 | 156767781 | 156767906 |
| chr2 | 156795741 | 156795856 |
| chr2 | 156861691 | 156861826 |
| chr2 | 157067881 | 157068056 |
| chr2 | 157114421 | 157114656 |
| chr2 | 157138961 | 157139106 |
| chr2 | 157166911 | 157167036 |
| chr2 | 157190011 | 157190166 |
| chr2 | 157339711 | 157339846 |
| chr2 | 157368811 | 157368986 |
| chr2 | 157407181 | 157407516 |
| chr2 | 157454181 | 157454396 |
| chr2 | 157479711 | 157479916 |
| chr2 | 157480281 | 157480396 |
| chr2 | 157483431 | 157483546 |
| chr2 | 157511731 | 157511856 |
| chr2 | 157528751 | 157528926 |
| chr2 | 157532681 | 157532816 |
| chr2 | 157533831 | 157533996 |
| chr2 | 157572781 | 157572906 |
| chr2 | 157573351 | 157573836 |
| chr2 | 157578861 | 157579016 |
| chr2 | 157650561 | 157650716 |
| chr2 | 157680371 | 157680546 |
| chr2 | 157846091 | 157846366 |
| chr2 | 157849161 | 157849366 |
| chr2 | 157851281 | 157851396 |
| chr2 | 157906761 | 157906996 |
| chr2 | 157969331 | 157969616 |
| chr2 | 158073901 | 158074076 |
| chr2 | 158244431 | 158244666 |
| chr2 | 158286791 | 158286926 |
| chr2 | 158294061 | 158294506 |
| chr2 | 158298131 | 158298366 |
| chr2 | 158412411 | 158412556 |
| chr2 | 158584821 | 158585096 |
| chr2 | 158590201 | 158590326 |
| chr2 | 158648431 | 158648526 |
| chr2 | 158694291 | 158694606 |
| chr2 | 159136471 | 159136606 |
| chr2 | 159143021 | 159143116 |
| chr2 | 159205501 | 159205636 |
| chr2 | 159231741 | 159231916 |
| chr2 | 159274561 | 159274746 |
| chr2 | 159298981 | 159299076 |
| chr2 | 159379181 | 159379306 |
| chr2 | 159757671 | 159757786 |
| chr2 | 159912171 | 159912306 |

|      |           |           |
|------|-----------|-----------|
| chr2 | 160040251 | 160040526 |
| chr2 | 160073671 | 160073846 |
| chr2 | 160074061 | 160074316 |
| chr2 | 160090651 | 160090766 |
| chr2 | 160110801 | 160110926 |
| chr2 | 160164391 | 160164526 |
| chr2 | 160164761 | 160164896 |
| chr2 | 160165031 | 160165156 |
| chr2 | 160176981 | 160177116 |
| chr2 | 160193901 | 160193976 |
| chr2 | 160195171 | 160195296 |
| chr2 | 160195481 | 160195866 |
| chr2 | 160199341 | 160199756 |
| chr2 | 160217551 | 160217696 |
| chr2 | 160217971 | 160218166 |
| chr2 | 160221831 | 160222016 |
| chr2 | 160222361 | 160222476 |
| chr2 | 160222501 | 160222636 |
| chr2 | 160222701 | 160222876 |
| chr2 | 160228781 | 160228886 |
| chr2 | 160229141 | 160229246 |
| chr2 | 160229311 | 160229546 |
| chr2 | 160240121 | 160240236 |
| chr2 | 160243841 | 160244046 |
| chr2 | 160244131 | 160244246 |
| chr2 | 160268371 | 160268576 |
| chr2 | 160496341 | 160496486 |
| chr2 | 160875561 | 160875676 |
| chr2 | 160958031 | 160958136 |
| chr2 | 161125321 | 161125426 |
| chr2 | 161125441 | 161125656 |
| chr2 | 161951061 | 161951216 |
| chr2 | 161951271 | 161951406 |
| chr2 | 162003391 | 162003546 |
| chr2 | 162100521 | 162100636 |
| chr2 | 162121611 | 162121806 |
| chr2 | 162223291 | 162223416 |
| chr2 | 162502021 | 162502126 |
| chr2 | 162591821 | 162591966 |
| chr2 | 162664261 | 162664486 |
| chr2 | 162665091 | 162665376 |
| chr2 | 162748001 | 162748126 |
| chr2 | 162751051 | 162751166 |
| chr2 | 162927441 | 162927646 |
| chr2 | 162976401 | 162976526 |
| chr2 | 162976911 | 162977046 |
| chr2 | 162980621 | 162980756 |
| chr2 | 162982041 | 162982266 |
| chr2 | 162982541 | 162982706 |
| chr2 | 162990161 | 162990686 |
| chr2 | 163173311 | 163173446 |
| chr2 | 163205611 | 163205786 |
| chr2 | 163246861 | 163246956 |

|      |           |           |
|------|-----------|-----------|
| chr2 | 163246981 | 163247196 |
| chr2 | 163278301 | 163278406 |
| chr2 | 163515521 | 163515636 |
| chr2 | 163829051 | 163829166 |
| chr2 | 163868891 | 163869046 |
| chr2 | 164096381 | 164096506 |
| chr2 | 164133131 | 164133256 |
| chr2 | 164185111 | 164185336 |
| chr2 | 164197161 | 164197236 |
| chr2 | 164210441 | 164210596 |
| chr2 | 164282421 | 164282526 |
| chr2 | 164540461 | 164540586 |
| chr2 | 164608701 | 164608886 |
| chr2 | 164675451 | 164675596 |
| chr2 | 164681051 | 164681156 |
| chr2 | 164734271 | 164734706 |
| chr2 | 164769741 | 164769916 |
| chr2 | 164822781 | 164822906 |
| chr2 | 164826721 | 164826846 |
| chr2 | 164830741 | 164830916 |
| chr2 | 164882381 | 164882776 |
| chr2 | 164887001 | 164887236 |
| chr2 | 164894681 | 164894836 |
| chr2 | 164896251 | 164896456 |
| chr2 | 164903681 | 164903826 |
| chr2 | 164903961 | 164904156 |
| chr2 | 164906351 | 164906566 |
| chr2 | 164926591 | 164926736 |
| chr2 | 164957941 | 164958076 |
| chr2 | 165008441 | 165008736 |
| chr2 | 165034891 | 165034996 |
| chr2 | 165201631 | 165201816 |
| chr2 | 165203741 | 165203946 |
| chr2 | 165250121 | 165250256 |
| chr2 | 165289511 | 165289636 |
| chr2 | 165292941 | 165293096 |
| chr2 | 165333411 | 165333526 |
| chr2 | 165342191 | 165342366 |
| chr2 | 165342401 | 165342556 |
| chr2 | 165345711 | 165345806 |
| chr2 | 165364631 | 165364776 |
| chr2 | 165409151 | 165409366 |
| chr2 | 165482891 | 165483026 |
| chr2 | 165545391 | 165545506 |
| chr2 | 165552681 | 165553416 |
| chr2 | 165560121 | 165560296 |
| chr2 | 165565871 | 165565976 |
| chr2 | 165586241 | 165586336 |
| chr2 | 165619261 | 165619376 |
| chr2 | 165646261 | 165646386 |
| chr2 | 165650991 | 165651226 |
| chr2 | 165659841 | 165659966 |
| chr2 | 165660741 | 165660866 |

|      |           |           |
|------|-----------|-----------|
| chr2 | 165698521 | 165698626 |
| chr2 | 165709291 | 165709406 |
| chr2 | 165721601 | 165721986 |
| chr2 | 165743761 | 165743936 |
| chr2 | 165796991 | 165797146 |
| chr2 | 165803391 | 165803646 |
| chr2 | 165872021 | 165872146 |
| chr2 | 165878571 | 165878686 |
| chr2 | 165906641 | 165906786 |
| chr2 | 165921691 | 165921786 |
| chr2 | 165928781 | 165928886 |
| chr2 | 165928901 | 165929016 |
| chr2 | 165929241 | 165929566 |
| chr2 | 165931261 | 165931426 |
| chr2 | 165940401 | 165940496 |
| chr2 | 165940611 | 165940736 |
| chr2 | 165962841 | 165962976 |
| chr2 | 165964541 | 165964806 |
| chr2 | 165964961 | 165965176 |
| chr2 | 165979121 | 165979306 |
| chr2 | 165979331 | 165979496 |
| chr2 | 165982731 | 165982896 |
| chr2 | 166021691 | 166022036 |
| chr2 | 166035311 | 166035466 |
| chr2 | 166036971 | 166037166 |
| chr2 | 166037641 | 166037866 |
| chr2 | 166037891 | 166038056 |
| chr2 | 166039871 | 166040226 |
| chr2 | 166045201 | 166045346 |
| chr2 | 166085801 | 166086046 |
| chr2 | 166118201 | 166118416 |
| chr2 | 166165721 | 166166136 |
| chr2 | 166206241 | 166206466 |
| chr2 | 166209501 | 166209646 |
| chr2 | 166226921 | 166227056 |
| chr2 | 166232831 | 166233106 |
| chr2 | 166250741 | 166250936 |
| chr2 | 166250971 | 166251116 |
| chr2 | 166311851 | 166312006 |
| chr2 | 166328651 | 166328786 |
| chr2 | 166362341 | 166362486 |
| chr2 | 166392491 | 166392586 |
| chr2 | 166418161 | 166418316 |
| chr2 | 166421681 | 166421786 |
| chr2 | 166426971 | 166427086 |
| chr2 | 166730651 | 166730766 |
| chr2 | 166777691 | 166777816 |
| chr2 | 166990121 | 166990306 |
| chr2 | 167009311 | 167009426 |
| chr2 | 167009461 | 167009586 |
| chr2 | 167024841 | 167024986 |
| chr2 | 167220051 | 167220206 |
| chr2 | 167278291 | 167278636 |

|      |           |           |
|------|-----------|-----------|
| chr2 | 167282561 | 167282926 |
| chr2 | 167350041 | 167350186 |
| chr2 | 167429561 | 167429716 |
| chr2 | 167514731 | 167515086 |
| chr2 | 167549581 | 167549726 |
| chr2 | 167650551 | 167650686 |
| chr2 | 167708541 | 167708736 |
| chr2 | 167747161 | 167747526 |
| chr2 | 167764211 | 167764366 |
| chr2 | 167858161 | 167858286 |
| chr2 | 168026261 | 168026376 |
| chr2 | 168223481 | 168223616 |
| chr2 | 168244631 | 168244886 |
| chr2 | 168291801 | 168291926 |
| chr2 | 168385781 | 168385926 |
| chr2 | 168495141 | 168495346 |
| chr2 | 168498181 | 168498296 |
| chr2 | 168522701 | 168523286 |
| chr2 | 168523431 | 168523676 |
| chr2 | 168552131 | 168552456 |
| chr2 | 168563481 | 168563646 |
| chr2 | 168642781 | 168643046 |
| chr2 | 168826101 | 168826216 |
| chr2 | 168882771 | 168882956 |
| chr2 | 168895531 | 168895846 |
| chr2 | 168989051 | 168989516 |
| chr2 | 169079471 | 169079576 |
| chr2 | 169206141 | 169206246 |
| chr2 | 169301291 | 169301426 |
| chr2 | 169312521 | 169312796 |
| chr2 | 169350021 | 169350106 |
| chr2 | 169357411 | 169357546 |
| chr2 | 169415141 | 169415256 |
| chr2 | 169446681 | 169446866 |
| chr2 | 169457561 | 169457686 |
| chr2 | 169474091 | 169474356 |
| chr2 | 169474431 | 169474786 |
| chr2 | 169481201 | 169481306 |
| chr2 | 169483971 | 169484116 |
| chr2 | 169525911 | 169526086 |
| chr2 | 169565261 | 169565446 |
| chr2 | 169571661 | 169571786 |
| chr2 | 169571821 | 169571946 |
| chr2 | 169583911 | 169584056 |
| chr2 | 169597461 | 169597586 |
| chr2 | 169597631 | 169598006 |
| chr2 | 169690491 | 169690556 |
| chr2 | 169731271 | 169731396 |
| chr2 | 169761771 | 169762056 |
| chr2 | 169763311 | 169763466 |
| chr2 | 169779091 | 169779266 |
| chr2 | 169804151 | 169804316 |
| chr2 | 169839031 | 169839186 |

|      |           |           |
|------|-----------|-----------|
| chr2 | 169853751 | 169853896 |
| chr2 | 169865401 | 169865566 |
| chr2 | 169873201 | 169873356 |
| chr2 | 169886961 | 169887066 |
| chr2 | 169896451 | 169896576 |
| chr2 | 169898261 | 169898436 |
| chr2 | 169937231 | 169937366 |
| chr2 | 169937441 | 169937626 |
| chr2 | 170003981 | 170004116 |
| chr2 | 170004341 | 170004496 |
| chr2 | 170004931 | 170005056 |
| chr2 | 170036051 | 170036426 |
| chr2 | 170096231 | 170096416 |
| chr2 | 170103061 | 170103226 |
| chr2 | 170238781 | 170239056 |
| chr2 | 170249231 | 170249356 |
| chr2 | 170249381 | 170249546 |
| chr2 | 170250101 | 170250216 |
| chr2 | 170341851 | 170341946 |
| chr2 | 170347161 | 170347256 |
| chr2 | 170350471 | 170350566 |
| chr2 | 170351241 | 170351386 |
| chr2 | 170411651 | 170411746 |
| chr2 | 170415451 | 170415636 |
| chr2 | 170422281 | 170422436 |
| chr2 | 170422441 | 170422596 |
| chr2 | 170435541 | 170435766 |
| chr2 | 170435831 | 170435976 |
| chr2 | 170448291 | 170448836 |
| chr2 | 170448871 | 170449026 |
| chr2 | 170450071 | 170450216 |
| chr2 | 170501781 | 170501976 |
| chr2 | 170518101 | 170518416 |
| chr2 | 170520181 | 170520296 |
| chr2 | 170520321 | 170520566 |
| chr2 | 170520601 | 170520796 |
| chr2 | 170521211 | 170521456 |
| chr2 | 170522201 | 170522276 |
| chr2 | 170528691 | 170528886 |
| chr2 | 170529621 | 170529876 |
| chr2 | 170550381 | 170550476 |
| chr2 | 170553821 | 170554176 |
| chr2 | 170946531 | 170946746 |
| chr2 | 170977391 | 170977516 |
| chr2 | 170988691 | 170988856 |
| chr2 | 171025641 | 171025766 |
| chr2 | 171420061 | 171420216 |
| chr2 | 171429421 | 171429536 |
| chr2 | 171521351 | 171521486 |
| chr2 | 171564161 | 171564656 |
| chr2 | 171580421 | 171580486 |
| chr2 | 171694911 | 171695086 |
| chr2 | 171695111 | 171695236 |

|      |           |           |
|------|-----------|-----------|
| chr2 | 171695391 | 171695516 |
| chr2 | 171738591 | 171738736 |
| chr2 | 171769571 | 171769716 |
| chr2 | 171796681 | 171796816 |
| chr2 | 171796961 | 171797076 |
| chr2 | 171998451 | 171998576 |
| chr2 | 171999341 | 171999516 |
| chr2 | 172015741 | 172015906 |
| chr2 | 172016371 | 172016496 |
| chr2 | 172016501 | 172016616 |
| chr2 | 172091151 | 172091356 |
| chr2 | 172176391 | 172176536 |
| chr2 | 172182201 | 172182386 |
| chr2 | 172207341 | 172207486 |
| chr2 | 172210931 | 172211096 |
| chr2 | 172374551 | 172374816 |
| chr2 | 172455571 | 172455786 |
| chr2 | 172489551 | 172489646 |
| chr2 | 172510301 | 172510456 |
| chr2 | 172522411 | 172522596 |
| chr2 | 172544221 | 172544536 |
| chr2 | 172549441 | 172549586 |
| chr2 | 172574151 | 172574366 |
| chr2 | 172576541 | 172576776 |
| chr2 | 172577761 | 172577916 |
| chr2 | 172578071 | 172578656 |
| chr2 | 172775591 | 172775716 |
| chr2 | 172779581 | 172779676 |
| chr2 | 172781671 | 172781866 |
| chr2 | 172781981 | 172782106 |
| chr2 | 172814451 | 172814886 |
| chr2 | 172815051 | 172815216 |
| chr2 | 172879931 | 172880046 |
| chr2 | 172883901 | 172884176 |
| chr2 | 172884191 | 172884536 |
| chr2 | 172889411 | 172889546 |
| chr2 | 172896591 | 172896716 |
| chr2 | 172896741 | 172897246 |
| chr2 | 172897311 | 172897496 |
| chr2 | 172901521 | 172901836 |
| chr2 | 172909391 | 172909526 |
| chr2 | 173020901 | 173021006 |
| chr2 | 173052561 | 173052716 |
| chr2 | 173116341 | 173116636 |
| chr2 | 173178951 | 173179056 |
| chr2 | 173182981 | 173183106 |
| chr2 | 173235721 | 173235926 |
| chr2 | 173253881 | 173254286 |
| chr2 | 173259261 | 173259456 |
| chr2 | 173283661 | 173283776 |
| chr2 | 173292411 | 173292536 |
| chr2 | 173292791 | 173292936 |
| chr2 | 173293481 | 173293626 |

|      |           |           |
|------|-----------|-----------|
| chr2 | 173296491 | 173296646 |
| chr2 | 173296761 | 173296936 |
| chr2 | 173355721 | 173356046 |
| chr2 | 173367491 | 173367606 |
| chr2 | 173368131 | 173368316 |
| chr2 | 173368471 | 173368696 |
| chr2 | 173373481 | 173373916 |
| chr2 | 173374011 | 173374166 |
| chr2 | 173384961 | 173385236 |
| chr2 | 173573801 | 173574086 |
| chr2 | 173580641 | 173580796 |
| chr2 | 173620331 | 173620506 |
| chr2 | 173621471 | 173621586 |
| chr2 | 173651371 | 173651666 |
| chr2 | 173664461 | 173664636 |
| chr2 | 173693121 | 173693326 |
| chr2 | 173693881 | 173694186 |
| chr2 | 173704001 | 173704126 |
| chr2 | 173724031 | 173724266 |
| chr2 | 173726061 | 173726176 |
| chr2 | 173732051 | 173732216 |
| chr2 | 173732331 | 173732536 |
| chr2 | 173843601 | 173843756 |
| chr2 | 173882151 | 173882266 |
| chr2 | 173882341 | 173882526 |
| chr2 | 173932171 | 173932266 |
| chr2 | 174350801 | 174350946 |
| chr2 | 178072421 | 178072596 |
| chr2 | 178525821 | 178525986 |
| chr2 | 178730931 | 178731186 |
| chr2 | 178911701 | 178911816 |
| chr2 | 179026241 | 179026446 |
| chr2 | 179038791 | 179038946 |
| chr2 | 179050521 | 179050676 |
| chr2 | 179137001 | 179137136 |
| chr2 | 179203361 | 179203456 |
| chr2 | 179233341 | 179233436 |
| chr2 | 179236641 | 179236816 |
| chr2 | 179236871 | 179237016 |
| chr2 | 179247871 | 179247966 |
| chr2 | 179560191 | 179560366 |
| chr2 | 179716641 | 179716796 |
| chr2 | 179750961 | 179751146 |
| chr2 | 179785581 | 179785716 |
| chr2 | 179842361 | 179842486 |
| chr2 | 179904241 | 179904426 |
| chr2 | 180222531 | 180222626 |
| chr2 | 180252101 | 180252376 |
| chr2 | 180834871 | 180834996 |
| chr2 | 180872491 | 180872556 |
| chr2 | 181158391 | 181158546 |
| chr2 | 181171321 | 181171656 |
| chr2 | 181173151 | 181173276 |



|      |          |          |
|------|----------|----------|
| chr1 | 3538971  | 3539116  |
| chr1 | 3539271  | 3539396  |
| chr1 | 4218551  | 4218716  |
| chr1 | 4588841  | 4588966  |
| chr1 | 4602051  | 4602186  |
| chr1 | 4658021  | 4658126  |
| chr1 | 4662471  | 4662736  |
| chr1 | 6750821  | 6750976  |
| chr1 | 7299401  | 7299576  |
| chr1 | 8467411  | 8467546  |
| chr1 | 9274941  | 9275196  |
| chr1 | 9512081  | 9512176  |
| chr1 | 9563571  | 9563706  |
| chr1 | 9569391  | 9569536  |
| chr1 | 9586381  | 9586516  |
| chr1 | 9586641  | 9586766  |
| chr1 | 9586941  | 9587146  |
| chr1 | 9634121  | 9634356  |
| chr1 | 9644041  | 9644166  |
| chr1 | 9644191  | 9644566  |
| chr1 | 9836061  | 9836216  |
| chr1 | 9974051  | 9974116  |
| chr1 | 10101261 | 10101446 |
| chr1 | 10270521 | 10270826 |
| chr1 | 10382391 | 10382496 |
| chr1 | 10582061 | 10582266 |
| chr1 | 11074821 | 11075016 |
| chr1 | 12383411 | 12383556 |
| chr1 | 12383841 | 12383966 |
| chr1 | 12395531 | 12395646 |
| chr1 | 12656121 | 12656416 |
| chr1 | 12656451 | 12656546 |
| chr1 | 12683221 | 12683326 |
| chr1 | 12762061 | 12762346 |
| chr1 | 12780301 | 12780446 |
| chr1 | 12819781 | 12819946 |
| chr1 | 12857211 | 12857486 |
| chr1 | 12864401 | 12864566 |
| chr1 | 12991051 | 12991146 |
| chr1 | 13004111 | 13004226 |
| chr1 | 13085971 | 13086276 |
| chr1 | 13299401 | 13299636 |
| chr1 | 13335441 | 13335596 |
| chr1 | 13626411 | 13626506 |
| chr1 | 13701251 | 13701356 |
| chr1 | 14148571 | 14148676 |
| chr1 | 14151361 | 14151446 |
| chr1 | 14178011 | 14178086 |
| chr1 | 14193451 | 14193716 |
| chr1 | 14283171 | 14283336 |
| chr1 | 14288771 | 14288876 |
| chr1 | 14289811 | 14290056 |
| chr1 | 14450111 | 14450236 |

|      |          |          |
|------|----------|----------|
| chr1 | 15391281 | 15391426 |
| chr1 | 15468881 | 15469066 |
| chr1 | 16112171 | 16112436 |
| chr1 | 16112511 | 16112616 |
| chr1 | 16112971 | 16113556 |
| chr1 | 16213681 | 16213826 |
| chr1 | 16214861 | 16215166 |
| chr1 | 16220111 | 16220266 |
| chr1 | 16220491 | 16220706 |
| chr1 | 16221241 | 16221396 |
| chr1 | 16234131 | 16234286 |
| chr1 | 16234391 | 16234596 |
| chr1 | 16530211 | 16530356 |
| chr1 | 18584261 | 18584466 |
| chr1 | 18942221 | 18942406 |
| chr1 | 18946761 | 18946926 |
| chr1 | 19202641 | 19202736 |
| chr1 | 19207011 | 19207136 |
| chr1 | 19207231 | 19207326 |
| chr1 | 19444411 | 19444536 |
| chr1 | 19666411 | 19666726 |
| chr1 | 19853761 | 19854066 |
| chr1 | 19884121 | 19884256 |
| chr1 | 20175581 | 20175686 |
| chr1 | 20287771 | 20288006 |
| chr1 | 20413681 | 20413836 |
| chr1 | 20455991 | 20456146 |
| chr1 | 20459181 | 20459346 |
| chr1 | 20830161 | 20830316 |
| chr1 | 20830681 | 20830816 |
| chr1 | 20849091 | 20849276 |
| chr1 | 20853421 | 20853536 |
| chr1 | 20883691 | 20883826 |
| chr1 | 20883871 | 20884016 |
| chr1 | 20884631 | 20884766 |
| chr1 | 20897411 | 20897506 |
| chr1 | 21874451 | 21874606 |
| chr1 | 22214241 | 22214376 |
| chr1 | 22277961 | 22278106 |
| chr1 | 22360841 | 22361046 |
| chr1 | 22533921 | 22534036 |
| chr1 | 23225871 | 23226036 |
| chr1 | 23644041 | 23644236 |
| chr1 | 23660851 | 23660986 |
| chr1 | 23673291 | 23673486 |
| chr1 | 23714531 | 23714676 |
| chr1 | 23997411 | 23997556 |
| chr1 | 24051981 | 24052106 |
| chr1 | 24061741 | 24061896 |
| chr1 | 24184921 | 24185096 |
| chr1 | 24200171 | 24200316 |
| chr1 | 24240671 | 24240886 |
| chr1 | 24246551 | 24246716 |

|      |          |          |
|------|----------|----------|
| chr1 | 24493701 | 24493876 |
| chr1 | 24622421 | 24622556 |
| chr1 | 25020661 | 25021096 |
| chr1 | 25125301 | 25125396 |
| chr1 | 25174061 | 25174196 |
| chr1 | 25181271 | 25181436 |
| chr1 | 25374881 | 25375066 |
| chr1 | 25375091 | 25375196 |
| chr1 | 25481581 | 25481696 |
| chr1 | 25517091 | 25517276 |
| chr1 | 30791701 | 30791816 |
| chr1 | 30792831 | 30792976 |
| chr1 | 30794511 | 30794626 |
| chr1 | 32505471 | 32505596 |
| chr1 | 33210281 | 33210356 |
| chr1 | 33465021 | 33465166 |
| chr1 | 33477921 | 33478056 |
| chr1 | 33842931 | 33843016 |
| chr1 | 33876441 | 33876566 |
| chr1 | 33914811 | 33914966 |
| chr1 | 33923961 | 33924116 |
| chr1 | 33934371 | 33934516 |
| chr1 | 33947491 | 33947696 |
| chr1 | 33961341 | 33961506 |
| chr1 | 33974481 | 33974626 |
| chr1 | 33975171 | 33975296 |
| chr1 | 33977521 | 33977686 |
| chr1 | 33977901 | 33978026 |
| chr1 | 33981481 | 33981616 |
| chr1 | 33985831 | 33986086 |
| chr1 | 34004981 | 34005316 |
| chr1 | 34007501 | 34007736 |
| chr1 | 34049421 | 34049556 |
| chr1 | 34051321 | 34051506 |
| chr1 | 34065681 | 34065996 |
| chr1 | 34072441 | 34072586 |
| chr1 | 34088211 | 34088336 |
| chr1 | 34095301 | 34095436 |
| chr1 | 34095481 | 34095636 |
| chr1 | 34103421 | 34103586 |
| chr1 | 34128891 | 34129036 |
| chr1 | 34738681 | 34738806 |
| chr1 | 34783831 | 34784006 |
| chr1 | 34822211 | 34822366 |
| chr1 | 34963511 | 34963656 |
| chr1 | 35195211 | 35195296 |
| chr1 | 35330171 | 35330446 |
| chr1 | 35472591 | 35472726 |
| chr1 | 35574201 | 35574336 |
| chr1 | 35587221 | 35587506 |
| chr1 | 35639711 | 35640106 |
| chr1 | 35755571 | 35755756 |
| chr1 | 35768801 | 35769266 |

|      |          |          |
|------|----------|----------|
| chr1 | 35834581 | 35834776 |
| chr1 | 35886111 | 35886436 |
| chr1 | 35886461 | 35886756 |
| chr1 | 35887771 | 35887906 |
| chr1 | 35888011 | 35888156 |
| chr1 | 35888411 | 35888666 |
| chr1 | 35888881 | 35888976 |
| chr1 | 35902641 | 35902736 |
| chr1 | 35948261 | 35948486 |
| chr1 | 35960341 | 35960496 |
| chr1 | 35961461 | 35961606 |
| chr1 | 36069171 | 36069286 |
| chr1 | 36069891 | 36070056 |
| chr1 | 36082391 | 36082516 |
| chr1 | 36082761 | 36082986 |
| chr1 | 36186511 | 36186736 |
| chr1 | 36200431 | 36200576 |
| chr1 | 36218011 | 36218256 |
| chr1 | 36254291 | 36254406 |
| chr1 | 36410341 | 36410436 |
| chr1 | 36414131 | 36414266 |
| chr1 | 36429001 | 36429146 |
| chr1 | 36498971 | 36499146 |
| chr1 | 36585061 | 36585166 |
| chr1 | 36749011 | 36749166 |
| chr1 | 36798701 | 36798886 |
| chr1 | 36833781 | 36833896 |
| chr1 | 36837731 | 36837946 |
| chr1 | 36858941 | 36859336 |
| chr1 | 36932911 | 36933006 |
| chr1 | 36971671 | 36971816 |
| chr1 | 37245461 | 37245636 |
| chr1 | 37479831 | 37480026 |
| chr1 | 37488921 | 37489056 |
| chr1 | 37556531 | 37556686 |
| chr1 | 37561211 | 37561356 |
| chr1 | 38144641 | 38144736 |
| chr1 | 38181781 | 38181886 |
| chr1 | 38189111 | 38189356 |
| chr1 | 38192611 | 38193056 |
| chr1 | 38207931 | 38208066 |
| chr1 | 38212801 | 38213056 |
| chr1 | 38213241 | 38213416 |
| chr1 | 38274221 | 38274346 |
| chr1 | 38281221 | 38281356 |
| chr1 | 38329111 | 38329316 |
| chr1 | 38339771 | 38340196 |
| chr1 | 38380871 | 38380996 |
| chr1 | 38381141 | 38381296 |
| chr1 | 38383131 | 38383376 |
| chr1 | 38385781 | 38385926 |
| chr1 | 38390821 | 38390946 |
| chr1 | 38456711 | 38456906 |

|      |          |          |
|------|----------|----------|
| chr1 | 38456921 | 38457096 |
| chr1 | 38458901 | 38459006 |
| chr1 | 38481571 | 38481716 |
| chr1 | 38483021 | 38483156 |
| chr1 | 38489111 | 38489296 |
| chr1 | 38490291 | 38490446 |
| chr1 | 38494731 | 38494976 |
| chr1 | 38506891 | 38507416 |
| chr1 | 38510441 | 38510596 |
| chr1 | 38580321 | 38580446 |
| chr1 | 38596741 | 38596926 |
| chr1 | 38602731 | 38602856 |
| chr1 | 38711321 | 38711456 |
| chr1 | 38711491 | 38711836 |
| chr1 | 38734641 | 38734836 |
| chr1 | 38838171 | 38838386 |
| chr1 | 39049951 | 39050136 |
| chr1 | 39050981 | 39051126 |
| chr1 | 39182461 | 39182586 |
| chr1 | 39251331 | 39251476 |
| chr1 | 39647331 | 39647466 |
| chr1 | 39674521 | 39674666 |
| chr1 | 39676131 | 39676226 |
| chr1 | 39676311 | 39676516 |
| chr1 | 39680931 | 39681066 |
| chr1 | 39757751 | 39757846 |
| chr1 | 39879321 | 39879436 |
| chr1 | 39927691 | 39927826 |
| chr1 | 39962591 | 39962876 |
| chr1 | 40169581 | 40169676 |
| chr1 | 40169681 | 40169926 |
| chr1 | 41100801 | 41100966 |
| chr1 | 41101051 | 41101206 |
| chr1 | 41101501 | 41101766 |
| chr1 | 41101841 | 41101976 |
| chr1 | 41102281 | 41102566 |
| chr1 | 41102751 | 41102986 |
| chr1 | 41103011 | 41103136 |
| chr1 | 41187621 | 41187896 |
| chr1 | 41303721 | 41303916 |
| chr1 | 41549571 | 41549786 |
| chr1 | 41596501 | 41596696 |
| chr1 | 41938631 | 41938726 |
| chr1 | 42097601 | 42097776 |
| chr1 | 42177791 | 42178056 |
| chr1 | 42178131 | 42178216 |
| chr1 | 42185831 | 42185966 |
| chr1 | 42187051 | 42187576 |
| chr1 | 42188511 | 42188626 |
| chr1 | 42202391 | 42202556 |
| chr1 | 42202671 | 42202836 |
| chr1 | 42292201 | 42292416 |
| chr1 | 42360881 | 42360996 |

|      |          |          |
|------|----------|----------|
| chr1 | 42361181 | 42361336 |
| chr1 | 42472301 | 42472436 |
| chr1 | 42483861 | 42484006 |
| chr1 | 42484011 | 42484296 |
| chr1 | 42484691 | 42484846 |
| chr1 | 42573401 | 42573746 |
| chr1 | 42821971 | 42822146 |
| chr1 | 42832901 | 42833526 |
| chr1 | 42889151 | 42889266 |
| chr1 | 43122981 | 43123136 |
| chr1 | 43137151 | 43137366 |
| chr1 | 43302841 | 43302996 |
| chr1 | 43304931 | 43305206 |
| chr1 | 43306291 | 43306396 |
| chr1 | 43316051 | 43316206 |
| chr1 | 43372041 | 43372206 |
| chr1 | 43467961 | 43468116 |
| chr1 | 44484831 | 44484946 |
| chr1 | 44559831 | 44559976 |
| chr1 | 44627271 | 44627366 |
| chr1 | 45831531 | 45831676 |
| chr1 | 46830641 | 46830856 |
| chr1 | 46832491 | 46832636 |
| chr1 | 51093241 | 51093406 |
| chr1 | 51093431 | 51093856 |
| chr1 | 51097431 | 51097686 |
| chr1 | 51287541 | 51287716 |
| chr1 | 51453261 | 51453406 |
| chr1 | 51453851 | 51454006 |
| chr1 | 51542051 | 51542256 |
| chr1 | 51581171 | 51581496 |
| chr1 | 51581551 | 51581646 |
| chr1 | 51588351 | 51588476 |
| chr1 | 51642051 | 51642426 |
| chr1 | 51690951 | 51691096 |
| chr1 | 51755041 | 51755176 |
| chr1 | 51794201 | 51794306 |
| chr1 | 51801311 | 51801436 |
| chr1 | 51838361 | 51838506 |
| chr1 | 51840701 | 51840826 |
| chr1 | 51852791 | 51852926 |
| chr1 | 51954141 | 51954226 |
| chr1 | 52094181 | 52094246 |
| chr1 | 52401221 | 52401386 |
| chr1 | 52446301 | 52446546 |
| chr1 | 52912341 | 52912516 |
| chr1 | 52960361 | 52960526 |
| chr1 | 53030691 | 53030806 |
| chr1 | 53574621 | 53574846 |
| chr1 | 53655031 | 53655246 |
| chr1 | 53808661 | 53808766 |
| chr1 | 53884991 | 53885146 |
| chr1 | 54137801 | 54137916 |

|      |          |          |
|------|----------|----------|
| chr1 | 54256171 | 54256316 |
| chr1 | 54677841 | 54678016 |
| chr1 | 54768781 | 54768946 |
| chr1 | 54778361 | 54778486 |
| chr1 | 54833051 | 54833206 |
| chr1 | 54841061 | 54841256 |
| chr1 | 55047901 | 55048116 |
| chr1 | 55048121 | 55048266 |
| chr1 | 55436901 | 55437036 |
| chr1 | 55473431 | 55473566 |
| chr1 | 55551041 | 55551156 |
| chr1 | 55554391 | 55554556 |
| chr1 | 55619121 | 55619376 |
| chr1 | 55645331 | 55645496 |
| chr1 | 55646721 | 55646926 |
| chr1 | 55650681 | 55650806 |
| chr1 | 55695281 | 55695396 |
| chr1 | 55832121 | 55832326 |
| chr1 | 56231141 | 56231316 |
| chr1 | 56231341 | 56231536 |
| chr1 | 56777881 | 56778056 |
| chr1 | 56843271 | 56843736 |
| chr1 | 57150001 | 57150186 |
| chr1 | 57162681 | 57162826 |
| chr1 | 57163191 | 57163346 |
| chr1 | 57374401 | 57374656 |
| chr1 | 57417731 | 57417886 |
| chr1 | 57430121 | 57430306 |
| chr1 | 57473501 | 57473656 |
| chr1 | 57551731 | 57551836 |
| chr1 | 57567201 | 57567326 |
| chr1 | 57567341 | 57567506 |
| chr1 | 57629671 | 57629786 |
| chr1 | 57686381 | 57686546 |
| chr1 | 57727181 | 57727326 |
| chr1 | 57769611 | 57769676 |
| chr1 | 57789921 | 57790106 |
| chr1 | 57806791 | 57806906 |
| chr1 | 57810731 | 57810896 |
| chr1 | 57813351 | 57813516 |
| chr1 | 57834211 | 57834386 |
| chr1 | 57834431 | 57834646 |
| chr1 | 57885051 | 57885196 |
| chr1 | 57886281 | 57886556 |
| chr1 | 57906581 | 57906686 |
| chr1 | 57974511 | 57974666 |
| chr1 | 57975141 | 57975236 |
| chr1 | 58064691 | 58064786 |
| chr1 | 58141781 | 58141996 |
| chr1 | 58234481 | 58234646 |
| chr1 | 58286271 | 58286366 |
| chr1 | 58303451 | 58303706 |
| chr1 | 58745121 | 58745286 |

|      |          |          |
|------|----------|----------|
| chr1 | 59213691 | 59213786 |
| chr1 | 59253751 | 59253866 |
| chr1 | 59271541 | 59271666 |
| chr1 | 59277711 | 59277796 |
| chr1 | 59278751 | 59278916 |
| chr1 | 59285921 | 59286046 |
| chr1 | 59339211 | 59339566 |
| chr1 | 59339641 | 59339796 |
| chr1 | 59403201 | 59403366 |
| chr1 | 59408061 | 59408196 |
| chr1 | 59408761 | 59409096 |
| chr1 | 59415051 | 59415236 |
| chr1 | 59424231 | 59424326 |
| chr1 | 59461131 | 59461276 |
| chr1 | 59465111 | 59465306 |
| chr1 | 59477591 | 59477726 |
| chr1 | 59515581 | 59515726 |
| chr1 | 59519131 | 59519296 |
| chr1 | 59523401 | 59523546 |
| chr1 | 59524471 | 59524586 |
| chr1 | 59524731 | 59524906 |
| chr1 | 59535201 | 59535346 |
| chr1 | 59720461 | 59720596 |
| chr1 | 59778391 | 59778516 |
| chr1 | 59888501 | 59888596 |
| chr1 | 60352001 | 60352116 |
| chr1 | 60509351 | 60509516 |
| chr1 | 60586291 | 60586356 |
| chr1 | 60606851 | 60607036 |
| chr1 | 60607041 | 60607216 |
| chr1 | 60607301 | 60607476 |
| chr1 | 60612581 | 60612696 |
| chr1 | 60796891 | 60797016 |
| chr1 | 60797071 | 60797286 |
| chr1 | 60798711 | 60798866 |
| chr1 | 60807411 | 60807596 |
| chr1 | 61005221 | 61005316 |
| chr1 | 61082671 | 61082826 |
| chr1 | 61090511 | 61090696 |
| chr1 | 61245731 | 61246016 |
| chr1 | 61250931 | 61251126 |
| chr1 | 61303621 | 61303866 |
| chr1 | 61351881 | 61351996 |
| chr1 | 61405101 | 61405306 |
| chr1 | 61576341 | 61576506 |
| chr1 | 61618161 | 61618356 |
| chr1 | 61876871 | 61877016 |
| chr1 | 61954781 | 61954906 |
| chr1 | 62105701 | 62105866 |
| chr1 | 62259581 | 62259666 |
| chr1 | 62305951 | 62306236 |
| chr1 | 62317071 | 62317396 |
| chr1 | 62317611 | 62317736 |



|      |          |          |
|------|----------|----------|
| chr1 | 62399841 | 62400016 |
| chr1 | 62423271 | 62423406 |
| chr1 | 62423801 | 62423866 |
| chr1 | 62423901 | 62424006 |
| chr1 | 62570991 | 62571076 |
| chr1 | 62582241 | 62582556 |
| chr1 | 62582991 | 62583106 |
| chr1 | 62634341 | 62634456 |
| chr1 | 62650851 | 62651026 |
| chr1 | 62651091 | 62651356 |
| chr1 | 62655291 | 62655426 |
| chr1 | 62671851 | 62672036 |
| chr1 | 62672531 | 62672676 |
| chr1 | 62682071 | 62682246 |
| chr1 | 62682341 | 62682496 |
| chr1 | 62684031 | 62684236 |
| chr1 | 62701011 | 62701136 |
| chr1 | 62701261 | 62701416 |
| chr1 | 62701761 | 62701986 |
| chr1 | 62711721 | 62712096 |
| chr1 | 62714421 | 62714786 |
| chr1 | 62718161 | 62718336 |
| chr1 | 62747101 | 62747216 |
| chr1 | 62761831 | 62762076 |
| chr1 | 62785691 | 62786046 |
| chr1 | 62821901 | 62822106 |
| chr1 | 62866861 | 62866996 |
| chr1 | 62927171 | 62927296 |
| chr1 | 62939331 | 62939656 |
| chr1 | 63149101 | 63149246 |
| chr1 | 63187381 | 63187536 |
| chr1 | 63302461 | 63302596 |
| chr1 | 63327061 | 63327176 |
| chr1 | 63352241 | 63352406 |
| chr1 | 63410591 | 63410726 |
| chr1 | 63410841 | 63410976 |
| chr1 | 63468681 | 63468906 |
| chr1 | 63938291 | 63938386 |
| chr1 | 63995041 | 63995136 |
| chr1 | 64022521 | 64022786 |
| chr1 | 64033201 | 64033406 |
| chr1 | 64040731 | 64040896 |
| chr1 | 64376801 | 64376946 |
| chr1 | 64655521 | 64655646 |
| chr1 | 64674731 | 64674856 |
| chr1 | 64722251 | 64722386 |
| chr1 | 64755011 | 64755166 |
| chr1 | 64782521 | 64782666 |
| chr1 | 64803081 | 64803256 |
| chr1 | 64909891 | 64909996 |
| chr1 | 64912751 | 64912886 |
| chr1 | 64985401 | 64985706 |
| chr1 | 64998521 | 64998696 |

|      |          |          |
|------|----------|----------|
| chr1 | 64998721 | 64998846 |
| chr1 | 65047111 | 65047296 |
| chr1 | 65469991 | 65470176 |
| chr1 | 65937241 | 65937366 |
| chr1 | 65937501 | 65937716 |
| chr1 | 66168891 | 66169106 |
| chr1 | 66178881 | 66179076 |
| chr1 | 66262311 | 66262466 |
| chr1 | 66322001 | 66322096 |
| chr1 | 66340791 | 66340916 |
| chr1 | 66604581 | 66604716 |
| chr1 | 66753451 | 66753756 |
| chr1 | 66765211 | 66765406 |
| chr1 | 66766691 | 66766826 |
| chr1 | 66873251 | 66873396 |
| chr1 | 66935631 | 66935736 |
| chr1 | 67574181 | 67574286 |
| chr1 | 67980601 | 67980776 |
| chr1 | 68111891 | 68112066 |
| chr1 | 68121601 | 68121756 |
| chr1 | 68958291 | 68958426 |
| chr1 | 69366761 | 69366906 |
| chr1 | 69367321 | 69367476 |
| chr1 | 69432231 | 69432466 |
| chr1 | 69447081 | 69447276 |
| chr1 | 69543791 | 69543896 |
| chr1 | 69590221 | 69590516 |
| chr1 | 69591601 | 69591716 |
| chr1 | 69609291 | 69609456 |
| chr1 | 69702121 | 69702306 |
| chr1 | 69720621 | 69720906 |
| chr1 | 69723971 | 69724326 |
| chr1 | 70375491 | 70375616 |
| chr1 | 70893691 | 70893846 |
| chr1 | 70981751 | 70981886 |
| chr1 | 71355301 | 71355466 |
| chr1 | 71491431 | 71491736 |
| chr1 | 71501601 | 71501786 |
| chr1 | 71564231 | 71564326 |
| chr1 | 71770281 | 71770756 |
| chr1 | 71770801 | 71770926 |
| chr1 | 71770951 | 71771366 |
| chr1 | 71819461 | 71819596 |
| chr1 | 71820111 | 71820376 |
| chr1 | 71853681 | 71853976 |
| chr1 | 71928951 | 71929086 |
| chr1 | 71929361 | 71929526 |
| chr1 | 72032731 | 72032936 |
| chr1 | 72116481 | 72116736 |
| chr1 | 72130791 | 72130936 |
| chr1 | 72137361 | 72137456 |
| chr1 | 72152451 | 72152546 |
| chr1 | 72189051 | 72189216 |

|      |          |          |
|------|----------|----------|
| chr1 | 72276971 | 72277186 |
| chr1 | 72511691 | 72511946 |
| chr1 | 72539521 | 72539626 |
| chr1 | 72539661 | 72539836 |
| chr1 | 72669611 | 72669756 |
| chr1 | 72688781 | 72688986 |
| chr1 | 72712241 | 72712376 |
| chr1 | 72738301 | 72738406 |
| chr1 | 72742521 | 72742616 |
| chr1 | 72756341 | 72756476 |
| chr1 | 72885131 | 72885276 |
| chr1 | 72893831 | 72894026 |
| chr1 | 72979271 | 72979426 |
| chr1 | 73023061 | 73023236 |
| chr1 | 73140721 | 73140886 |
| chr1 | 73185171 | 73185296 |
| chr1 | 73192891 | 73193056 |
| chr1 | 73204061 | 73204216 |
| chr1 | 73296931 | 73297096 |
| chr1 | 73299041 | 73299206 |
| chr1 | 73332671 | 73332766 |
| chr1 | 73367111 | 73367276 |
| chr1 | 73393551 | 73393706 |
| chr1 | 73524601 | 73524766 |
| chr1 | 73525291 | 73525416 |
| chr1 | 73528211 | 73528486 |
| chr1 | 73697951 | 73698056 |
| chr1 | 73840601 | 73840736 |
| chr1 | 73933501 | 73933606 |
| chr1 | 73987291 | 73987586 |
| chr1 | 74036711 | 74036946 |
| chr1 | 74037031 | 74037186 |
| chr1 | 74276251 | 74276426 |
| chr1 | 74371401 | 74371556 |
| chr1 | 74697421 | 74697526 |
| chr1 | 74898151 | 74898306 |
| chr1 | 75222861 | 75222986 |
| chr1 | 75325811 | 75325936 |
| chr1 | 75327051 | 75327206 |
| chr1 | 75339021 | 75339356 |
| chr1 | 75348431 | 75348696 |
| chr1 | 75391441 | 75391556 |
| chr1 | 75396411 | 75396516 |
| chr1 | 75401391 | 75401576 |
| chr1 | 75488391 | 75488556 |
| chr1 | 75525421 | 75525576 |
| chr1 | 75546061 | 75546186 |
| chr1 | 75563791 | 75563946 |
| chr1 | 75566871 | 75567016 |
| chr1 | 75567191 | 75567286 |
| chr1 | 75576341 | 75576536 |
| chr1 | 75725091 | 75725236 |
| chr1 | 75809391 | 75809546 |

|      |          |          |
|------|----------|----------|
| chr1 | 75892671 | 75892796 |
| chr1 | 75924311 | 75924506 |
| chr1 | 75924761 | 75924846 |
| chr1 | 75954131 | 75954316 |
| chr1 | 75954681 | 75954826 |
| chr1 | 75974251 | 75974376 |
| chr1 | 75974481 | 75974616 |
| chr1 | 75981341 | 75981466 |
| chr1 | 76129681 | 76129846 |
| chr1 | 76277371 | 76277516 |
| chr1 | 76277901 | 76278136 |
| chr1 | 76559991 | 76560086 |
| chr1 | 76789711 | 76789896 |
| chr1 | 76859061 | 76859216 |
| chr1 | 76893751 | 76893976 |
| chr1 | 76967791 | 76967886 |
| chr1 | 77110281 | 77110486 |
| chr1 | 77149901 | 77150016 |
| chr1 | 77223291 | 77223406 |
| chr1 | 77329661 | 77329846 |
| chr1 | 77340771 | 77340936 |
| chr1 | 77350331 | 77350426 |
| chr1 | 77367541 | 77367666 |
| chr1 | 77376901 | 77377086 |
| chr1 | 77378181 | 77378356 |
| chr1 | 77378951 | 77379256 |
| chr1 | 77394101 | 77394206 |
| chr1 | 77423131 | 77423326 |
| chr1 | 77429021 | 77429136 |
| chr1 | 77475331 | 77475466 |
| chr1 | 77500771 | 77500956 |
| chr1 | 77524431 | 77524606 |
| chr1 | 77812601 | 77812906 |
| chr1 | 77812991 | 77813116 |
| chr1 | 77964941 | 77965066 |
| chr1 | 77993491 | 77993646 |
| chr1 | 78024901 | 78025006 |
| chr1 | 78048861 | 78048996 |
| chr1 | 78050651 | 78051116 |
| chr1 | 78051151 | 78051286 |
| chr1 | 78051331 | 78051436 |
| chr1 | 78064271 | 78064466 |
| chr1 | 78071031 | 78071236 |
| chr1 | 78205491 | 78205636 |
| chr1 | 78205801 | 78205946 |
| chr1 | 78205971 | 78206226 |
| chr1 | 78247401 | 78247526 |
| chr1 | 78253491 | 78253586 |
| chr1 | 78259651 | 78259766 |
| chr1 | 78259931 | 78260176 |
| chr1 | 78269201 | 78269346 |
| chr1 | 78274081 | 78274176 |
| chr1 | 78420911 | 78421106 |

|      |          |          |
|------|----------|----------|
| chr1 | 78470161 | 78470316 |
| chr1 | 78493751 | 78493876 |
| chr1 | 79329671 | 79329746 |
| chr1 | 79460551 | 79460696 |
| chr1 | 79512181 | 79512396 |
| chr1 | 79557361 | 79557716 |
| chr1 | 79557831 | 79558046 |
| chr1 | 79902921 | 79903156 |
| chr1 | 80086261 | 80086376 |
| chr1 | 80086451 | 80086646 |
| chr1 | 80288831 | 80288896 |
| chr1 | 80872231 | 80872436 |
| chr1 | 80974991 | 80975166 |
| chr1 | 81114191 | 81114336 |
| chr1 | 81389701 | 81389886 |
| chr1 | 81783201 | 81783396 |
| chr1 | 81829151 | 81829286 |
| chr1 | 81986371 | 81986516 |
| chr1 | 81991721 | 81991916 |
| chr1 | 82029951 | 82030106 |
| chr1 | 82203101 | 82203256 |
| chr1 | 82244371 | 82244516 |
| chr1 | 82268491 | 82268616 |
| chr1 | 82321881 | 82322046 |
| chr1 | 82324871 | 82324966 |
| chr1 | 82325201 | 82325316 |
| chr1 | 82344411 | 82344746 |
| chr1 | 82354351 | 82354476 |
| chr1 | 82354921 | 82355066 |
| chr1 | 82422871 | 82422946 |
| chr1 | 82476311 | 82476536 |
| chr1 | 82543321 | 82543456 |
| chr1 | 82695121 | 82695246 |
| chr1 | 83164961 | 83165086 |
| chr1 | 83241181 | 83241356 |
| chr1 | 84097751 | 84097906 |
| chr1 | 84760601 | 84760706 |
| chr1 | 84761601 | 84761746 |
| chr1 | 84825891 | 84826016 |
| chr1 | 84826661 | 84826826 |
| chr1 | 87728971 | 87729326 |
| chr1 | 87763741 | 87763916 |
| chr1 | 87764111 | 87764296 |
| chr1 | 87765751 | 87765916 |
| chr1 | 87838921 | 87839016 |
| chr1 | 87865601 | 87865706 |
| chr1 | 88049151 | 88049306 |
| chr1 | 88049501 | 88049656 |
| chr1 | 88067611 | 88067786 |
| chr1 | 88067861 | 88068026 |
| chr1 | 88087061 | 88087276 |
| chr1 | 88136571 | 88136796 |
| chr1 | 88140121 | 88140246 |

|      |          |          |
|------|----------|----------|
| chr1 | 88140831 | 88140976 |
| chr1 | 88319881 | 88320026 |
| chr1 | 88454261 | 88454456 |
| chr1 | 88454541 | 88454686 |
| chr1 | 88458721 | 88458826 |
| chr1 | 88484401 | 88484516 |
| chr1 | 88491971 | 88492036 |
| chr1 | 88824011 | 88824236 |
| chr1 | 88833841 | 88833996 |
| chr1 | 89001541 | 89001706 |
| chr1 | 89001751 | 89001956 |
| chr1 | 89003571 | 89003936 |
| chr1 | 89070451 | 89070586 |
| chr1 | 89125931 | 89126076 |
| chr1 | 89225851 | 89226016 |
| chr1 | 89314631 | 89314776 |
| chr1 | 89394281 | 89394426 |
| chr1 | 89417341 | 89417596 |
| chr1 | 89517671 | 89517836 |
| chr1 | 90306611 | 90306996 |
| chr1 | 90339141 | 90339246 |
| chr1 | 90391841 | 90392006 |
| chr1 | 90470781 | 90470926 |
| chr1 | 90471161 | 90471336 |
| chr1 | 90471591 | 90471786 |
| chr1 | 90474801 | 90474996 |
| chr1 | 90588401 | 90588526 |
| chr1 | 90639771 | 90639956 |
| chr1 | 90669861 | 90670186 |
| chr1 | 90678871 | 90679046 |
| chr1 | 90679071 | 90679186 |
| chr1 | 90706521 | 90706846 |
| chr1 | 90710141 | 90710286 |
| chr1 | 90732101 | 90732416 |
| chr1 | 90770961 | 90771136 |
| chr1 | 90774281 | 90774416 |
| chr1 | 90791061 | 90791246 |
| chr1 | 90870741 | 90870926 |
| chr1 | 90900641 | 90900806 |
| chr1 | 90904561 | 90904666 |
| chr1 | 90924011 | 90924206 |
| chr1 | 90939891 | 90940126 |
| chr1 | 90941111 | 90941346 |
| chr1 | 90947471 | 90947566 |
| chr1 | 90978981 | 90979116 |
| chr1 | 91103821 | 91103976 |
| chr1 | 91231911 | 91232046 |
| chr1 | 91232051 | 91232246 |
| chr1 | 91327651 | 91327786 |
| chr1 | 91341891 | 91342046 |
| chr1 | 91348891 | 91349206 |
| chr1 | 91349231 | 91349296 |
| chr1 | 91351231 | 91351346 |

|      |          |          |
|------|----------|----------|
| chr1 | 91372301 | 91372446 |
| chr1 | 91372451 | 91372666 |
| chr1 | 91397731 | 91397866 |
| chr1 | 91478911 | 91479186 |
| chr1 | 91501611 | 91501736 |
| chr1 | 91502251 | 91502496 |
| chr1 | 91502631 | 91502896 |
| chr1 | 91504181 | 91504406 |
| chr1 | 91520141 | 91520396 |
| chr1 | 91533891 | 91534076 |
| chr1 | 91534281 | 91534436 |
| chr1 | 91534551 | 91534956 |
| chr1 | 91539461 | 91539616 |
| chr1 | 91540141 | 91540486 |
| chr1 | 91541201 | 91541446 |
| chr1 | 91541461 | 91541586 |
| chr1 | 91541661 | 91541756 |
| chr1 | 91561151 | 91561276 |
| chr1 | 91581801 | 91581956 |
| chr1 | 91582101 | 91582556 |
| chr1 | 91582651 | 91582746 |
| chr1 | 91586721 | 91586896 |
| chr1 | 91598161 | 91598326 |
| chr1 | 91655041 | 91655146 |
| chr1 | 91655631 | 91655756 |
| chr1 | 91677421 | 91677586 |
| chr1 | 91678671 | 91678866 |
| chr1 | 91679671 | 91679876 |
| chr1 | 91680011 | 91680216 |
| chr1 | 91680401 | 91680536 |
| chr1 | 91701661 | 91701766 |
| chr1 | 91702141 | 91702346 |
| chr1 | 91711451 | 91711646 |
| chr1 | 91715561 | 91715686 |
| chr1 | 91716701 | 91716986 |
| chr1 | 91717391 | 91717506 |
| chr1 | 91723561 | 91723826 |
| chr1 | 91730921 | 91731176 |
| chr1 | 91743601 | 91743926 |
| chr1 | 91756911 | 91757116 |
| chr1 | 91757211 | 91757366 |
| chr1 | 91793541 | 91793706 |
| chr1 | 91795691 | 91795796 |
| chr1 | 91795891 | 91796046 |
| chr1 | 91802041 | 91802236 |
| chr1 | 91832361 | 91832576 |
| chr1 | 91881241 | 91881546 |
| chr1 | 91881671 | 91881816 |
| chr1 | 91882591 | 91882696 |
| chr1 | 91910331 | 91910506 |
| chr1 | 91950361 | 91950566 |
| chr1 | 91963641 | 91963816 |
| chr1 | 91964081 | 91964186 |

|      |          |          |
|------|----------|----------|
| chr1 | 91965941 | 91966046 |
| chr1 | 91997701 | 91997906 |
| chr1 | 92001121 | 92001226 |
| chr1 | 92020541 | 92020676 |
| chr1 | 92021811 | 92021906 |
| chr1 | 92051601 | 92051846 |
| chr1 | 92052871 | 92053036 |
| chr1 | 92053081 | 92053286 |
| chr1 | 92053361 | 92053596 |
| chr1 | 92053621 | 92053836 |
| chr1 | 92057151 | 92057266 |
| chr1 | 92059701 | 92059836 |
| chr1 | 92062961 | 92063096 |
| chr1 | 92077391 | 92077896 |
| chr1 | 92099431 | 92099556 |
| chr1 | 92099691 | 92099856 |
| chr1 | 92129171 | 92129316 |
| chr1 | 92151501 | 92151786 |
| chr1 | 92151831 | 92151986 |
| chr1 | 92166601 | 92166846 |
| chr1 | 92184231 | 92184376 |
| chr1 | 92184531 | 92184676 |
| chr1 | 92184691 | 92184956 |
| chr1 | 92235891 | 92235986 |
| chr1 | 92255111 | 92255266 |
| chr1 | 92255431 | 92255596 |
| chr1 | 92255851 | 92256016 |
| chr1 | 92281491 | 92281796 |
| chr1 | 92305341 | 92305496 |
| chr1 | 92305691 | 92305876 |
| chr1 | 92307051 | 92307206 |
| chr1 | 92337021 | 92337466 |
| chr1 | 92349061 | 92349346 |
| chr1 | 92349531 | 92349776 |
| chr1 | 92374001 | 92374176 |
| chr1 | 92374741 | 92374816 |
| chr1 | 92374991 | 92375196 |
| chr1 | 92375511 | 92375686 |
| chr1 | 92805391 | 92805546 |
| chr1 | 92862791 | 92862886 |
| chr1 | 92890091 | 92890266 |
| chr1 | 93011891 | 93012076 |
| chr1 | 93058421 | 93058606 |
| chr1 | 93093081 | 93093246 |
| chr1 | 93286281 | 93286526 |
| chr1 | 93523771 | 93523956 |
| chr1 | 93527321 | 93527426 |
| chr1 | 93559881 | 93560016 |
| chr1 | 93578051 | 93578316 |
| chr1 | 93581131 | 93581276 |
| chr1 | 93587811 | 93587936 |
| chr1 | 93587951 | 93588016 |
| chr1 | 93590561 | 93590686 |



|      |           |           |
|------|-----------|-----------|
| chr1 | 93635021  | 93635206  |
| chr1 | 93647011  | 93647146  |
| chr1 | 93701651  | 93701746  |
| chr1 | 93702751  | 93703026  |
| chr1 | 93872781  | 93872876  |
| chr1 | 94004771  | 94004896  |
| chr1 | 94116451  | 94116586  |
| chr1 | 94146611  | 94146786  |
| chr1 | 94196781  | 94196876  |
| chr1 | 94232131  | 94232296  |
| chr1 | 94232441  | 94232536  |
| chr1 | 94350831  | 94350936  |
| chr1 | 94511411  | 94511506  |
| chr1 | 94517491  | 94517636  |
| chr1 | 95527961  | 95528106  |
| chr1 | 96243531  | 96243706  |
| chr1 | 96378681  | 96378816  |
| chr1 | 96990411  | 96990556  |
| chr1 | 97824131  | 97824266  |
| chr1 | 99371101  | 99371256  |
| chr1 | 99677751  | 99677906  |
| chr1 | 99679041  | 99679216  |
| chr1 | 99693761  | 99693856  |
| chr1 | 99709901  | 99710146  |
| chr1 | 99748971  | 99749166  |
| chr1 | 99805351  | 99805526  |
| chr1 | 99878151  | 99878376  |
| chr1 | 99908621  | 99908766  |
| chr1 | 99917351  | 99917496  |
| chr1 | 101226061 | 101226206 |
| chr1 | 102610181 | 102610256 |
| chr1 | 107006641 | 107006716 |
| chr1 | 107671141 | 107671276 |
| chr1 | 107831731 | 107831826 |
| chr1 | 108018871 | 108018946 |
| chr1 | 108020531 | 108020676 |
| chr1 | 108021981 | 108022086 |
| chr1 | 108035301 | 108035516 |
| chr1 | 109476681 | 109476796 |
| chr1 | 112293571 | 112293706 |
| chr1 | 112626781 | 112626926 |
| chr1 | 120250451 | 120250626 |
| chr1 | 120262641 | 120262806 |
| chr1 | 120262871 | 120263016 |
| chr1 | 120284531 | 120284766 |
| chr1 | 120417341 | 120417476 |
| chr1 | 120470671 | 120470826 |
| chr1 | 120499711 | 120499856 |
| chr1 | 120653211 | 120653376 |
| chr1 | 120706681 | 120706986 |
| chr1 | 120707081 | 120707256 |
| chr1 | 120708431 | 120708576 |
| chr1 | 120714761 | 120714896 |

|      |           |           |
|------|-----------|-----------|
| chr1 | 120734891 | 120735046 |
| chr1 | 120739011 | 120739116 |
| chr1 | 120741461 | 120741836 |
| chr1 | 120810721 | 120810856 |
| chr1 | 120853481 | 120853646 |
| chr1 | 120862611 | 120862746 |
| chr1 | 120898751 | 120898936 |
| chr1 | 121162871 | 121162986 |
| chr1 | 121300231 | 121300386 |
| chr1 | 121469821 | 121470236 |
| chr1 | 121471001 | 121471086 |
| chr1 | 121696711 | 121696846 |
| chr1 | 121714221 | 121714296 |
| chr1 | 121852231 | 121852326 |
| chr1 | 121999111 | 121999276 |
| chr1 | 122294451 | 122294586 |
| chr1 | 122599191 | 122599356 |
| chr1 | 122738551 | 122738756 |
| chr1 | 122739951 | 122740076 |
| chr1 | 122841441 | 122841646 |
| chr1 | 122841781 | 122841946 |
| chr1 | 122874091 | 122874176 |
| chr1 | 122928941 | 122929046 |
| chr1 | 123004871 | 123005066 |
| chr1 | 123054531 | 123054676 |
| chr1 | 123199031 | 123199336 |
| chr1 | 123216371 | 123216476 |
| chr1 | 123218191 | 123218336 |
| chr1 | 123529731 | 123529876 |
| chr1 | 125932061 | 125932156 |
| chr1 | 127115311 | 127115496 |
| chr1 | 127258431 | 127258616 |
| chr1 | 127504351 | 127504706 |
| chr1 | 127730541 | 127730706 |
| chr1 | 128339861 | 128340056 |
| chr1 | 128364791 | 128364886 |
| chr1 | 128645231 | 128645446 |
| chr1 | 128693351 | 128693716 |
| chr1 | 128724641 | 128724776 |
| chr1 | 128799551 | 128799746 |
| chr1 | 129166151 | 129166276 |
| chr1 | 129166661 | 129166826 |
| chr1 | 129210751 | 129210976 |
| chr1 | 129224981 | 129225136 |
| chr1 | 129228361 | 129228736 |
| chr1 | 129247981 | 129248176 |
| chr1 | 129358571 | 129358686 |
| chr1 | 129358831 | 129358906 |
| chr1 | 129358961 | 129359266 |
| chr1 | 129383921 | 129384076 |
| chr1 | 129404201 | 129404806 |
| chr1 | 129607801 | 129607976 |
| chr1 | 129691431 | 129691536 |

|      |           |           |
|------|-----------|-----------|
| chr1 | 130171871 | 130172086 |
| chr1 | 130222341 | 130222436 |
| chr1 | 130299791 | 130299946 |
| chr1 | 130400401 | 130400556 |
| chr1 | 130424881 | 130425036 |
| chr1 | 130514841 | 130515036 |
| chr1 | 130520041 | 130520226 |
| chr1 | 130534411 | 130534556 |
| chr1 | 130538891 | 130539046 |
| chr1 | 132638931 | 132639146 |
| chr1 | 132911941 | 132912176 |
| chr1 | 132935531 | 132935686 |
| chr1 | 133067561 | 133067736 |
| chr1 | 133410521 | 133410596 |
| chr1 | 133574251 | 133574476 |
| chr1 | 133579761 | 133579956 |
| chr1 | 133745091 | 133745356 |
| chr1 | 133770241 | 133770366 |
| chr1 | 134040561 | 134040736 |
| chr1 | 134040761 | 134040946 |
| chr1 | 134048471 | 134048606 |
| chr1 | 134060581 | 134060676 |
| chr1 | 134060681 | 134060796 |
| chr1 | 134068881 | 134069026 |
| chr1 | 134091871 | 134092016 |
| chr1 | 134110641 | 134111016 |
| chr1 | 134118901 | 134119306 |
| chr1 | 134119911 | 134120126 |
| chr1 | 134126031 | 134126126 |
| chr1 | 134131271 | 134131476 |
| chr1 | 134132121 | 134132356 |
| chr1 | 134132501 | 134132646 |
| chr1 | 134162991 | 134163186 |
| chr1 | 134212941 | 134213136 |
| chr1 | 134387781 | 134387966 |
| chr1 | 134389861 | 134390196 |
| chr1 | 134390291 | 134390396 |
| chr1 | 134475731 | 134475846 |
| chr1 | 134593521 | 134593696 |
| chr1 | 134745111 | 134745306 |
| chr1 | 134755921 | 134756236 |
| chr1 | 134773471 | 134773636 |
| chr1 | 134775371 | 134775506 |
| chr1 | 134838861 | 134838986 |
| chr1 | 134904471 | 134904626 |
| chr1 | 135073651 | 135073826 |
| chr1 | 135079431 | 135079546 |
| chr1 | 135082301 | 135082436 |
| chr1 | 135082641 | 135082766 |
| chr1 | 135092991 | 135093196 |
| chr1 | 135095351 | 135095596 |
| chr1 | 135126061 | 135126206 |
| chr1 | 135137331 | 135137426 |

|      |           |           |
|------|-----------|-----------|
| chr1 | 135194581 | 135194726 |
| chr1 | 135215491 | 135215616 |
| chr1 | 135223131 | 135223346 |
| chr1 | 135226961 | 135227106 |
| chr1 | 135236351 | 135236476 |
| chr1 | 135237081 | 135237216 |
| chr1 | 135240491 | 135240656 |
| chr1 | 135280401 | 135280596 |
| chr1 | 135303581 | 135303786 |
| chr1 | 135307431 | 135307556 |
| chr1 | 135328541 | 135328796 |
| chr1 | 135340651 | 135340766 |
| chr1 | 135345081 | 135345216 |
| chr1 | 135346541 | 135346656 |
| chr1 | 135353281 | 135353436 |
| chr1 | 135508731 | 135508886 |
| chr1 | 135512311 | 135512416 |
| chr1 | 135527241 | 135527376 |
| chr1 | 135583781 | 135583876 |
| chr1 | 135642281 | 135642376 |
| chr1 | 135659871 | 135660166 |
| chr1 | 135661131 | 135661536 |
| chr1 | 135672771 | 135672936 |
| chr1 | 135675771 | 135676006 |
| chr1 | 135676311 | 135676736 |
| chr1 | 135701131 | 135701536 |
| chr1 | 135882871 | 135883106 |
| chr1 | 135886931 | 135887046 |
| chr1 | 135888041 | 135888266 |
| chr1 | 136043421 | 136043566 |
| chr1 | 136164421 | 136164516 |
| chr1 | 136370931 | 136371076 |
| chr1 | 136423291 | 136423376 |
| chr1 | 136529871 | 136530036 |
| chr1 | 136589721 | 136589946 |
| chr1 | 136822161 | 136822316 |
| chr1 | 137291751 | 137291826 |
| chr1 | 137308881 | 137309076 |
| chr1 | 137321311 | 137321426 |
| chr1 | 137328951 | 137329096 |
| chr1 | 137331771 | 137331916 |
| chr1 | 137332271 | 137332596 |
| chr1 | 137374561 | 137374676 |
| chr1 | 137452831 | 137453006 |
| chr1 | 137483811 | 137484026 |
| chr1 | 137507951 | 137508096 |
| chr1 | 137510891 | 137511056 |
| chr1 | 137596721 | 137596866 |
| chr1 | 137597391 | 137597566 |
| chr1 | 137605181 | 137605396 |
| chr1 | 137610801 | 137611066 |
| chr1 | 137637591 | 137637716 |
| chr1 | 137959411 | 137959536 |

|      |           |           |
|------|-----------|-----------|
| chr1 | 137989911 | 137990006 |
| chr1 | 138045561 | 138045806 |
| chr1 | 138048071 | 138048266 |
| chr1 | 138233321 | 138233446 |
| chr1 | 138378451 | 138378676 |
| chr1 | 138379611 | 138379886 |
| chr1 | 138394601 | 138394876 |
| chr1 | 138400461 | 138400566 |
| chr1 | 138452211 | 138452336 |
| chr1 | 138470901 | 138471086 |
| chr1 | 138477941 | 138478146 |
| chr1 | 138478331 | 138478486 |
| chr1 | 138523581 | 138523676 |
| chr1 | 138531621 | 138531756 |
| chr1 | 138531901 | 138531996 |
| chr1 | 138534301 | 138534486 |
| chr1 | 138534701 | 138534856 |
| chr1 | 138541801 | 138542026 |
| chr1 | 138553971 | 138554126 |
| chr1 | 138592701 | 138593156 |
| chr1 | 138593761 | 138594136 |
| chr1 | 138598211 | 138598436 |
| chr1 | 138598751 | 138599016 |
| chr1 | 138599181 | 138599406 |
| chr1 | 138726811 | 138726946 |
| chr1 | 138728481 | 138728606 |
| chr1 | 138783091 | 138783236 |
| chr1 | 138868071 | 138868186 |
| chr1 | 138950241 | 138950366 |
| chr1 | 138958651 | 138958936 |
| chr1 | 138990541 | 138990716 |
| chr1 | 138990791 | 138990926 |
| chr1 | 139011591 | 139011686 |
| chr1 | 139038141 | 139038556 |
| chr1 | 139190221 | 139190366 |
| chr1 | 139222141 | 139222266 |
| chr1 | 139457391 | 139457476 |
| chr1 | 139716581 | 139717016 |
| chr1 | 139744441 | 139744596 |
| chr1 | 139782921 | 139783056 |
| chr1 | 139827421 | 139827526 |
| chr1 | 139839131 | 139839266 |
| chr1 | 139846131 | 139846256 |
| chr1 | 140201991 | 140202126 |
| chr1 | 140316001 | 140316166 |
| chr1 | 140316631 | 140316756 |
| chr1 | 140316761 | 140316986 |
| chr1 | 140320991 | 140321186 |
| chr1 | 140364361 | 140364536 |
| chr1 | 140388241 | 140388446 |
| chr1 | 140388601 | 140388756 |
| chr1 | 140407451 | 140407706 |
| chr1 | 140552901 | 140553056 |

|      |           |           |
|------|-----------|-----------|
| chr1 | 140584301 | 140584466 |
| chr1 | 142001141 | 142001246 |
| chr1 | 145780991 | 145781096 |
| chr1 | 148287051 | 148287206 |
| chr1 | 151646931 | 151647046 |
| chr1 | 151658781 | 151658916 |
| chr1 | 152660371 | 152660496 |
| chr1 | 152763121 | 152763396 |
| chr1 | 152800891 | 152801206 |
| chr1 | 152803141 | 152803266 |
| chr1 | 152803331 | 152803456 |
| chr1 | 152809011 | 152809256 |
| chr1 | 152848621 | 152849006 |
| chr1 | 152850861 | 152850976 |
| chr1 | 152854411 | 152854546 |
| chr1 | 152858521 | 152858656 |
| chr1 | 152862831 | 152862996 |
| chr1 | 152900711 | 152900836 |
| chr1 | 152906401 | 152906546 |
| chr1 | 152922521 | 152922736 |
| chr1 | 152928271 | 152928516 |
| chr1 | 152928551 | 152928666 |
| chr1 | 152929901 | 152930006 |
| chr1 | 153233681 | 153233846 |
| chr1 | 153392231 | 153392436 |
| chr1 | 153706401 | 153706516 |
| chr1 | 153781421 | 153781676 |
| chr1 | 153806711 | 153806966 |
| chr1 | 153839521 | 153839696 |
| chr1 | 153935411 | 153935506 |
| chr1 | 154032661 | 154032836 |
| chr1 | 154347951 | 154348096 |
| chr1 | 154365951 | 154366106 |
| chr1 | 154371881 | 154372056 |
| chr1 | 154443281 | 154443426 |
| chr1 | 154443441 | 154443606 |
| chr1 | 154465281 | 154465416 |
| chr1 | 154519251 | 154519346 |
| chr1 | 154553841 | 154553976 |
| chr1 | 154555761 | 154555976 |
| chr1 | 154579321 | 154579456 |
| chr1 | 154609751 | 154609936 |
| chr1 | 154681641 | 154681846 |
| chr1 | 154735281 | 154735466 |
| chr1 | 154735671 | 154735856 |
| chr1 | 154794361 | 154794536 |
| chr1 | 154795331 | 154795466 |
| chr1 | 154815901 | 154816026 |
| chr1 | 154821721 | 154822036 |
| chr1 | 154825021 | 154825116 |
| chr1 | 154860751 | 154861016 |
| chr1 | 154861081 | 154861216 |
| chr1 | 154897071 | 154897246 |

|      |           |           |
|------|-----------|-----------|
| chr1 | 154934691 | 154934826 |
| chr1 | 154955291 | 154955456 |
| chr1 | 154962041 | 154962146 |
| chr1 | 154964491 | 154964666 |
| chr1 | 155036961 | 155037086 |
| chr1 | 155040401 | 155040516 |
| chr1 | 155079191 | 155079466 |
| chr1 | 155081951 | 155082076 |
| chr1 | 155120841 | 155120996 |
| chr1 | 155140941 | 155141076 |
| chr1 | 155361901 | 155362036 |
| chr1 | 155404361 | 155404496 |
| chr1 | 155427261 | 155427506 |
| chr1 | 155431361 | 155431556 |
| chr1 | 155525191 | 155525316 |
| chr1 | 155709251 | 155709496 |
| chr1 | 155740881 | 155740976 |
| chr1 | 155748791 | 155748966 |
| chr1 | 155749001 | 155749116 |
| chr1 | 155759281 | 155759426 |
| chr1 | 155759831 | 155759976 |
| chr1 | 155778411 | 155778526 |
| chr1 | 155799221 | 155799376 |
| chr1 | 156413591 | 156413746 |
| chr1 | 156793151 | 156793336 |
| chr1 | 156841041 | 156841236 |
| chr1 | 156870891 | 156871056 |
| chr1 | 156975721 | 156975856 |
| chr1 | 157073971 | 157074096 |
| chr1 | 157150971 | 157151256 |
| chr1 | 157225751 | 157225916 |
| chr1 | 157253641 | 157254116 |
| chr1 | 157254181 | 157254266 |
| chr1 | 157292991 | 157293116 |
| chr1 | 157368551 | 157368666 |
| chr1 | 157512931 | 157513076 |
| chr1 | 157523571 | 157523696 |
| chr1 | 157870751 | 157870916 |
| chr1 | 158067461 | 158067626 |
| chr1 | 158068601 | 158068766 |
| chr1 | 158307071 | 158307196 |
| chr1 | 158307351 | 158307556 |
| chr1 | 158419691 | 158419836 |
| chr1 | 158587161 | 158587326 |
| chr1 | 158588751 | 158589096 |
| chr1 | 158589131 | 158589316 |
| chr1 | 158591501 | 158591706 |
| chr1 | 158595281 | 158595416 |
| chr1 | 158615861 | 158616176 |
| chr1 | 158617281 | 158617636 |
| chr1 | 158617661 | 158617816 |
| chr1 | 158617961 | 158618316 |
| chr1 | 158625971 | 158626166 |

|      |           |           |
|------|-----------|-----------|
| chr1 | 158626601 | 158626806 |
| chr1 | 158645031 | 158645246 |
| chr1 | 158662701 | 158662766 |
| chr1 | 158662831 | 158662926 |
| chr1 | 158665691 | 158665816 |
| chr1 | 158675561 | 158675706 |
| chr1 | 158698441 | 158698596 |
| chr1 | 158769151 | 158769326 |
| chr1 | 158853311 | 158853646 |
| chr1 | 158876631 | 158876786 |
| chr1 | 158876971 | 158877106 |
| chr1 | 158885021 | 158885206 |
| chr1 | 158891981 | 158892186 |
| chr1 | 158900621 | 158900826 |
| chr1 | 159067811 | 159068036 |
| chr1 | 159291921 | 159292066 |
| chr1 | 159482431 | 159482556 |
| chr1 | 159521151 | 159521336 |
| chr1 | 159583341 | 159583486 |
| chr1 | 159748381 | 159748476 |
| chr1 | 159891681 | 159891816 |
| chr1 | 160029761 | 160030006 |
| chr1 | 160052321 | 160052456 |
| chr1 | 160137471 | 160137746 |
| chr1 | 160336871 | 160337046 |
| chr1 | 160338731 | 160338876 |
| chr1 | 160737621 | 160737736 |
| chr1 | 160964591 | 160964706 |
| chr1 | 161375771 | 161375886 |
| chr1 | 161388131 | 161388306 |
| chr1 | 161388641 | 161388766 |
| chr1 | 161417141 | 161417236 |
| chr1 | 161487911 | 161488046 |
| chr1 | 161507411 | 161507726 |
| chr1 | 161574241 | 161574396 |
| chr1 | 162188541 | 162188676 |
| chr1 | 162486831 | 162487026 |
| chr1 | 163353291 | 163353456 |
| chr1 | 163810771 | 163810966 |
| chr1 | 163827531 | 163827666 |
| chr1 | 163828211 | 163828376 |
| chr1 | 163828731 | 163828856 |
| chr1 | 163874651 | 163874776 |
| chr1 | 163874811 | 163874936 |
| chr1 | 163998941 | 163999136 |
| chr1 | 163999161 | 163999286 |
| chr1 | 164046401 | 164046546 |
| chr1 | 164048301 | 164048416 |
| chr1 | 164052551 | 164052686 |
| chr1 | 164054171 | 164054266 |
| chr1 | 164091191 | 164091306 |
| chr1 | 164198821 | 164198966 |
| chr1 | 164262961 | 164263056 |



|      |           |           |
|------|-----------|-----------|
| chr1 | 164275381 | 164275666 |
| chr1 | 164345951 | 164346066 |
| chr1 | 164427461 | 164427566 |
| chr1 | 164753401 | 164753626 |
| chr1 | 164988681 | 164988826 |
| chr1 | 165098541 | 165098646 |
| chr1 | 165413221 | 165413356 |
| chr1 | 165539651 | 165539736 |
| chr1 | 165745231 | 165745436 |
| chr1 | 165885501 | 165885666 |
| chr1 | 166051031 | 166051126 |
| chr1 | 166055191 | 166055296 |
| chr1 | 166154141 | 166154316 |
| chr1 | 166244541 | 166244686 |
| chr1 | 166244931 | 166245096 |
| chr1 | 166245901 | 166246066 |
| chr1 | 166250681 | 166250826 |
| chr1 | 166270731 | 166270966 |
| chr1 | 166272881 | 166273066 |
| chr1 | 166278191 | 166278316 |
| chr1 | 166309181 | 166309376 |
| chr1 | 166830991 | 166831076 |
| chr1 | 166883711 | 166883776 |
| chr1 | 167117391 | 167117576 |
| chr1 | 167453791 | 167454086 |
| chr1 | 167466181 | 167466476 |
| chr1 | 167476261 | 167476396 |
| chr1 | 167529461 | 167529706 |
| chr1 | 167530411 | 167530556 |
| chr1 | 167537091 | 167537266 |
| chr1 | 167538391 | 167538626 |
| chr1 | 167573331 | 167573426 |
| chr1 | 167579461 | 167579706 |
| chr1 | 167584761 | 167585146 |
| chr1 | 167630621 | 167630776 |
| chr1 | 167650961 | 167651096 |
| chr1 | 167651271 | 167651796 |
| chr1 | 167653991 | 167654206 |
| chr1 | 167669951 | 167670196 |
| chr1 | 167671171 | 167671366 |
| chr1 | 167671461 | 167671626 |
| chr1 | 167673251 | 167673486 |
| chr1 | 167837211 | 167837356 |
| chr1 | 167884851 | 167884996 |
| chr1 | 167890111 | 167890266 |
| chr1 | 167968101 | 167968246 |
| chr1 | 167976591 | 167976696 |
| chr1 | 168040951 | 168041096 |
| chr1 | 168539301 | 168539416 |
| chr1 | 168631501 | 168631836 |
| chr1 | 168784841 | 168785036 |
| chr1 | 168785541 | 168785636 |
| chr1 | 168918831 | 168918996 |

|      |           |           |
|------|-----------|-----------|
| chr1 | 168955631 | 168955746 |
| chr1 | 169077231 | 169077436 |
| chr1 | 169086031 | 169086226 |
| chr1 | 169093451 | 169093776 |
| chr1 | 169093831 | 169093906 |
| chr1 | 169115921 | 169116176 |
| chr1 | 169388871 | 169388976 |
| chr1 | 169554111 | 169554266 |
| chr1 | 169570991 | 169571096 |
| chr1 | 169571281 | 169571686 |
| chr1 | 169591561 | 169591746 |
| chr1 | 169591791 | 169591956 |
| chr1 | 169594851 | 169594976 |
| chr1 | 169598471 | 169598916 |
| chr1 | 169625681 | 169625806 |
| chr1 | 169625871 | 169626136 |
| chr1 | 169626271 | 169626386 |
| chr1 | 169639091 | 169639286 |
| chr1 | 169642941 | 169643216 |
| chr1 | 170000331 | 170000446 |
| chr1 | 170016561 | 170016676 |
| chr1 | 170016831 | 170016936 |
| chr1 | 170051831 | 170051956 |
| chr1 | 170078441 | 170078586 |
| chr1 | 170102571 | 170102706 |
| chr1 | 170102751 | 170102846 |
| chr1 | 170125681 | 170125836 |
| chr1 | 170155741 | 170155966 |
| chr1 | 170156701 | 170156846 |
| chr1 | 170191731 | 170191876 |
| chr1 | 170228911 | 170229156 |
| chr1 | 170239201 | 170239306 |
| chr1 | 170239641 | 170239776 |
| chr1 | 170240031 | 170240156 |
| chr1 | 170241891 | 170242006 |
| chr1 | 170247291 | 170247656 |
| chr1 | 170263141 | 170263266 |
| chr1 | 170374261 | 170374406 |
| chr1 | 170377661 | 170377756 |
| chr1 | 170434941 | 170435056 |
| chr1 | 170435141 | 170435276 |
| chr1 | 170545171 | 170545366 |
| chr1 | 170545381 | 170545536 |
| chr1 | 170545621 | 170545756 |
| chr1 | 170546011 | 170546226 |
| chr1 | 170806261 | 170806486 |
| chr1 | 170888191 | 170888516 |
| chr1 | 170956371 | 170956506 |
| chr1 | 170997741 | 170997846 |
| chr1 | 171054021 | 171054156 |
| chr1 | 171075321 | 171075646 |
| chr1 | 171181051 | 171181126 |
| chr1 | 171204701 | 171204806 |

|      |           |           |
|------|-----------|-----------|
| chr1 | 171220531 | 171220666 |
| chr1 | 171295781 | 171295936 |
| chr1 | 171496291 | 171496506 |
| chr1 | 171845161 | 171845276 |
| chr1 | 171894411 | 171894596 |
| chr1 | 172238661 | 172238796 |
| chr1 | 172253041 | 172253176 |
| chr1 | 172294491 | 172294736 |
| chr1 | 172316271 | 172316416 |
| chr1 | 172321491 | 172321626 |
| chr1 | 172321981 | 172322066 |
| chr1 | 172323071 | 172323196 |
| chr1 | 172332351 | 172332826 |
| chr1 | 172336741 | 172336856 |
| chr1 | 172339411 | 172339566 |
| chr1 | 172339731 | 172339996 |
| chr1 | 172340111 | 172340206 |
| chr1 | 172511121 | 172511246 |
| chr1 | 172949541 | 172949666 |
| chr1 | 173066041 | 173066246 |
| chr1 | 173066341 | 173066486 |
| chr1 | 173272021 | 173272236 |
| chr1 | 173272361 | 173272506 |
| chr1 | 173327571 | 173327876 |
| chr1 | 173785501 | 173785636 |
| chr1 | 173849461 | 173849746 |
| chr1 | 173932001 | 173932216 |
| chr1 | 174144651 | 174144916 |
| chr1 | 174174771 | 174174916 |
| chr1 | 174177481 | 174177596 |
| chr1 | 174181681 | 174181826 |
| chr1 | 174187181 | 174187376 |
| chr1 | 174187391 | 174187576 |
| chr1 | 174228841 | 174229006 |
| chr1 | 174229011 | 174229156 |
| chr1 | 174242841 | 174243026 |
| chr1 | 174243071 | 174243316 |
| chr1 | 174294321 | 174294426 |
| chr1 | 174347321 | 174347426 |
| chr1 | 174347501 | 174347656 |
| chr1 | 174454111 | 174454326 |
| chr1 | 176865701 | 176865946 |
| chr1 | 177167141 | 177167296 |
| chr1 | 177222441 | 177222536 |
| chr1 | 177284721 | 177284846 |
| chr1 | 177348121 | 177348236 |
| chr1 | 177444741 | 177444906 |
| chr1 | 177453091 | 177453196 |
| chr1 | 177506871 | 177507016 |
| chr1 | 177515771 | 177515976 |
| chr1 | 178064491 | 178064616 |
| chr1 | 178464161 | 178464346 |
| chr1 | 178829311 | 178829486 |

|      |           |           |
|------|-----------|-----------|
| chr1 | 178986981 | 178987246 |
| chr1 | 179212151 | 179212336 |
| chr1 | 179260151 | 179260346 |
| chr1 | 179290671 | 179290776 |
| chr1 | 179354651 | 179354926 |
| chr1 | 179355131 | 179355276 |
| chr1 | 179398991 | 179399246 |
| chr1 | 179459131 | 179459226 |
| chr1 | 179460291 | 179460406 |
| chr1 | 179460511 | 179460746 |
| chr1 | 180410801 | 180410946 |
| chr1 | 180475331 | 180475436 |
| chr1 | 180476841 | 180476986 |
| chr1 | 180511381 | 180511536 |
| chr1 | 180513861 | 180514046 |
| chr1 | 180514111 | 180514306 |
| chr1 | 180544621 | 180544796 |
| chr1 | 180942971 | 180943116 |
| chr1 | 180943121 | 180943316 |
| chr1 | 180944241 | 180944406 |
| chr1 | 180945501 | 180945666 |
| chr1 | 180957071 | 180957176 |
| chr1 | 181014661 | 181014916 |
| chr1 | 181044141 | 181044296 |
| chr1 | 181049061 | 181049206 |
| chr1 | 181053931 | 181054056 |
| chr1 | 181064711 | 181064816 |
| chr1 | 181178071 | 181178226 |
| chr1 | 181239191 | 181239326 |
| chr1 | 181310581 | 181311106 |
| chr1 | 181312891 | 181313046 |
| chr1 | 181320591 | 181320816 |
| chr1 | 181384911 | 181385006 |
| chr1 | 181684041 | 181684256 |
| chr1 | 181702401 | 181702576 |
| chr1 | 181788351 | 181788466 |
| chr1 | 181906461 | 181906566 |
| chr1 | 181992471 | 181992616 |
| chr1 | 182012591 | 182012756 |
| chr1 | 182180501 | 182180626 |
| chr1 | 182665711 | 182665846 |
| chr1 | 182714921 | 182715256 |
| chr1 | 182720091 | 182720256 |
| chr1 | 182720501 | 182720666 |
| chr1 | 182721241 | 182721406 |
| chr1 | 182755541 | 182756136 |
| chr1 | 182774411 | 182774526 |
| chr1 | 182788831 | 182789076 |
| chr1 | 183083591 | 183083686 |
| chr1 | 183284851 | 183285006 |
| chr1 | 183362871 | 183362996 |
| chr1 | 183371751 | 183371876 |
| chr1 | 183469071 | 183469186 |

|      |           |           |
|------|-----------|-----------|
| chr1 | 183578711 | 183578886 |
| chr1 | 183592821 | 183593076 |
| chr1 | 183675451 | 183675626 |
| chr1 | 183675961 | 183676196 |
| chr1 | 183758941 | 183759146 |
| chr1 | 183771811 | 183772026 |
| chr1 | 183889721 | 183889906 |
| chr1 | 183918621 | 183919066 |
| chr1 | 183928041 | 183928156 |
| chr1 | 183928631 | 183928886 |
| chr1 | 184168591 | 184168716 |
| chr1 | 184302401 | 184302516 |
| chr1 | 184527721 | 184527876 |
| chr1 | 184536411 | 184536646 |
| chr1 | 184536781 | 184536886 |
| chr1 | 184537901 | 184538016 |
| chr1 | 184616271 | 184616396 |
| chr1 | 184745031 | 184745316 |
| chr1 | 185753211 | 185753376 |
| chr1 | 185842071 | 185842196 |
| chr1 | 185879561 | 185879716 |
| chr1 | 186142451 | 186142896 |
| chr1 | 186220281 | 186220556 |
| chr1 | 186237031 | 186237166 |
| chr1 | 186322821 | 186323036 |
| chr1 | 186364401 | 186364606 |
| chr1 | 186376441 | 186376596 |
| chr1 | 186389661 | 186389836 |
| chr1 | 186393241 | 186393356 |
| chr1 | 186409611 | 186409716 |
| chr1 | 186456281 | 186456816 |
| chr1 | 186482921 | 186483236 |
| chr1 | 186690501 | 186690606 |
| chr1 | 186698441 | 186698756 |
| chr1 | 186772501 | 186772616 |
| chr1 | 186792881 | 186793016 |
| chr1 | 186901831 | 186902166 |
| chr1 | 187182851 | 187183046 |
| chr1 | 187289021 | 187289166 |
| chr1 | 187518611 | 187519076 |
| chr1 | 187547951 | 187548166 |
| chr1 | 187552471 | 187552596 |
| chr1 | 187883301 | 187883426 |
| chr1 | 187883541 | 187883706 |
| chr1 | 188136061 | 188136366 |
| chr1 | 188136531 | 188136666 |
| chr1 | 188170401 | 188170636 |
| chr1 | 188214961 | 188215076 |
| chr1 | 188247831 | 188247976 |
| chr1 | 188256511 | 188256616 |
| chr1 | 188443111 | 188443266 |
| chr1 | 188496001 | 188496166 |
| chr1 | 188520371 | 188520706 |

|      |           |           |
|------|-----------|-----------|
| chr1 | 188535381 | 188535506 |
| chr1 | 188536571 | 188536916 |
| chr1 | 188543531 | 188543936 |
| chr1 | 188610031 | 188610236 |
| chr1 | 188623971 | 188624146 |
| chr1 | 188626301 | 188626566 |
| chr1 | 188627511 | 188627676 |
| chr1 | 188631851 | 188632056 |
| chr1 | 188644661 | 188644776 |
| chr1 | 188646171 | 188646376 |
| chr1 | 188646411 | 188646546 |
| chr1 | 188689121 | 188689226 |
| chr1 | 188778331 | 188778596 |
| chr1 | 188921711 | 188921866 |
| chr1 | 188927361 | 188927466 |
| chr1 | 188927481 | 188927566 |
| chr1 | 188931491 | 188931676 |
| chr1 | 188978191 | 188978536 |
| chr1 | 188978611 | 188978896 |
| chr1 | 188980401 | 188980506 |
| chr1 | 188987831 | 188987956 |
| chr1 | 188988091 | 188988316 |
| chr1 | 189056981 | 189057096 |
| chr1 | 189079121 | 189079306 |
| chr1 | 189206181 | 189206416 |
| chr1 | 189465641 | 189465776 |
| chr1 | 189488421 | 189488516 |
| chr1 | 189496821 | 189496916 |
| chr1 | 189508761 | 189508906 |
| chr1 | 189522341 | 189522506 |
| chr1 | 189640081 | 189640236 |
| chr1 | 189682971 | 189683086 |
| chr1 | 189705581 | 189705736 |
| chr1 | 189707961 | 189708156 |
| chr1 | 189708531 | 189708666 |
| chr1 | 189709411 | 189709536 |
| chr1 | 189744181 | 189744366 |
| chr1 | 189802711 | 189802916 |
| chr1 | 189806051 | 189806176 |
| chr1 | 189868311 | 189868456 |
| chr1 | 189885741 | 189885876 |
| chr1 | 189885891 | 189886046 |
| chr1 | 189886481 | 189886586 |
| chr1 | 189896871 | 189897156 |
| chr1 | 189897211 | 189897386 |
| chr1 | 189962881 | 189962986 |
| chr1 | 190250641 | 190250776 |
| chr1 | 190357001 | 190357136 |
| chr1 | 190361831 | 190361906 |
| chr1 | 190638211 | 190638336 |
| chr1 | 190643681 | 190643816 |
| chr1 | 190695591 | 190695756 |
| chr1 | 190698111 | 190698336 |

|      |           |           |
|------|-----------|-----------|
| chr1 | 190715571 | 190715696 |
| chr1 | 191103271 | 191103426 |
| chr1 | 191195711 | 191195996 |
| chr1 | 191278981 | 191279086 |
| chr1 | 191333951 | 191334056 |
| chr1 | 191408431 | 191408606 |
| chr1 | 191457551 | 191457806 |
| chr1 | 191468621 | 191468756 |
| chr1 | 191468761 | 191468926 |
| chr1 | 191478001 | 191478166 |
| chr1 | 191488401 | 191488556 |
| chr1 | 191490701 | 191490806 |
| chr1 | 191556111 | 191556266 |
| chr1 | 191585871 | 191586026 |
| chr1 | 191590101 | 191590276 |
| chr1 | 191620311 | 191620436 |
| chr1 | 191630371 | 191630446 |
| chr1 | 191633031 | 191633336 |
| chr1 | 191679311 | 191679566 |
| chr1 | 191768141 | 191768366 |
| chr1 | 191768391 | 191768526 |
| chr1 | 191828801 | 191828916 |
| chr1 | 191829721 | 191829836 |
| chr1 | 191830271 | 191830486 |
| chr1 | 191849091 | 191849436 |
| chr1 | 191849761 | 191849876 |
| chr1 | 191850021 | 191850226 |
| chr1 | 191850261 | 191850596 |
| chr1 | 191856821 | 191856986 |
| chr1 | 191891001 | 191891176 |
| chr1 | 191891351 | 191891536 |
| chr1 | 191892341 | 191892526 |
| chr1 | 191892571 | 191892706 |
| chr1 | 191892731 | 191892876 |
| chr1 | 191964821 | 191964946 |
| chr1 | 191987231 | 191987366 |
| chr1 | 192007551 | 192007686 |
| chr1 | 192048541 | 192048676 |
| chr1 | 192064431 | 192064556 |
| chr1 | 192158251 | 192158426 |
| chr1 | 192226531 | 192226636 |
| chr1 | 192233881 | 192233996 |
| chr1 | 192265311 | 192265446 |
| chr1 | 192283081 | 192283416 |
| chr1 | 192509401 | 192509656 |
| chr1 | 192509721 | 192509826 |
| chr1 | 192879061 | 192879286 |
| chr1 | 192879461 | 192879636 |
| chr1 | 192978321 | 192978676 |
| chr1 | 193077921 | 193078116 |
| chr1 | 193317021 | 193317236 |
| chr1 | 193329141 | 193329336 |
| chr1 | 193332501 | 193332596 |

|      |           |           |
|------|-----------|-----------|
| chr1 | 193345191 | 193345296 |
| chr1 | 193346631 | 193346756 |
| chr1 | 193363591 | 193363776 |
| chr1 | 193364401 | 193364556 |
| chr1 | 193405251 | 193405386 |
| chr1 | 193485711 | 193486086 |
| chr1 | 193540121 | 193540286 |
| chr1 | 193648591 | 193648696 |
| chr1 | 194014141 | 194014266 |
| chr1 | 194220251 | 194220336 |
| chr1 | 194221781 | 194221916 |
| chr1 | 194223391 | 194223496 |
| chr1 | 194524011 | 194524166 |
| chr1 | 194531141 | 194531306 |
| chr1 | 194531431 | 194531566 |
| chr1 | 194953311 | 194953436 |
| chr1 | 195006131 | 195006436 |
| chr1 | 195062101 | 195062206 |
| chr1 | 195108331 | 195108516 |
| chr1 | 195124411 | 195124656 |
| chr1 | 195124731 | 195124976 |
| chr1 | 195131541 | 195131686 |
| chr1 | 195186111 | 195186446 |
| chr1 | 195197741 | 195197816 |
| chr1 | 195207331 | 195207506 |
| chr1 | 195269441 | 195269596 |
| chr1 | 195328201 | 195328426 |
| chr1 | 195328441 | 195328566 |
| chr1 | 195355761 | 195355976 |
| chr1 | 195356001 | 195356146 |
| chr1 | 195366731 | 195366896 |
| chr1 | 195373141 | 195373296 |
| chr1 | 195590901 | 195590986 |
| chr1 | 195597561 | 195597926 |
| chr1 | 195597971 | 195598096 |
| chr1 | 195690031 | 195690186 |
| chr1 | 195742751 | 195742876 |
| chr1 | 195861821 | 195861976 |
| chr1 | 196155871 | 196155996 |
| chr1 | 196173501 | 196173656 |
| chr1 | 196322651 | 196322786 |
| chr1 | 196338311 | 196338616 |
| chr9 | 4420161   | 4420276   |
| chr9 | 7659561   | 7659676   |
| chr9 | 7958861   | 7958986   |
| chr9 | 7959131   | 7959226   |
| chr9 | 7961911   | 7962126   |
| chr9 | 9086451   | 9086536   |
| chr9 | 10275571  | 10275676  |
| chr9 | 10362131  | 10362256  |
| chr9 | 13246661  | 13246806  |
| chr9 | 13286301  | 13286456  |
| chr9 | 13316051  | 13316306  |



|      |          |          |
|------|----------|----------|
| chr9 | 13332811 | 13332976 |
| chr9 | 13334471 | 13334616 |
| chr9 | 13353751 | 13353896 |
| chr9 | 13362871 | 13363056 |
| chr9 | 13403081 | 13403216 |
| chr9 | 13415451 | 13415596 |
| chr9 | 13439681 | 13439806 |
| chr9 | 13440611 | 13440856 |
| chr9 | 13448471 | 13448596 |
| chr9 | 13606261 | 13606356 |
| chr9 | 13664251 | 13664566 |
| chr9 | 13682491 | 13682636 |
| chr9 | 13729451 | 13729606 |
| chr9 | 13804551 | 13804636 |
| chr9 | 13831811 | 13831906 |
| chr9 | 13885341 | 13885546 |
| chr9 | 13926001 | 13926156 |
| chr9 | 13983721 | 13983916 |
| chr9 | 14034181 | 14034336 |
| chr9 | 14384671 | 14384806 |
| chr9 | 14480141 | 14480256 |
| chr9 | 14652431 | 14652646 |
| chr9 | 14754581 | 14754736 |
| chr9 | 14760661 | 14760826 |
| chr9 | 14938901 | 14938996 |
| chr9 | 15171481 | 15171596 |
| chr9 | 15172311 | 15172456 |
| chr9 | 15172521 | 15172656 |
| chr9 | 15253911 | 15253976 |
| chr9 | 15256131 | 15256246 |
| chr9 | 15265921 | 15266056 |
| chr9 | 15408761 | 15409106 |
| chr9 | 15420811 | 15421026 |
| chr9 | 15482611 | 15482736 |
| chr9 | 15858161 | 15858276 |
| chr9 | 16095371 | 16095486 |
| chr9 | 16150001 | 16150236 |
| chr9 | 20440501 | 20440626 |
| chr9 | 20440711 | 20440846 |
| chr9 | 20471511 | 20471656 |
| chr9 | 20702041 | 20702136 |
| chr9 | 20775721 | 20775846 |
| chr9 | 20967001 | 20967166 |
| chr9 | 21537881 | 21538056 |
| chr9 | 21714101 | 21714226 |
| chr9 | 21977421 | 21977566 |
| chr9 | 22267641 | 22267796 |
| chr9 | 22308211 | 22308306 |
| chr9 | 22440611 | 22440926 |
| chr9 | 22457381 | 22457506 |
| chr9 | 22457791 | 22457906 |
| chr9 | 22598041 | 22598176 |
| chr9 | 22632171 | 22632266 |

|      |          |          |
|------|----------|----------|
| chr9 | 22753791 | 22753916 |
| chr9 | 22754181 | 22754376 |
| chr9 | 22754441 | 22754576 |
| chr9 | 22755231 | 22755326 |
| chr9 | 22755631 | 22755806 |
| chr9 | 22756091 | 22756266 |
| chr9 | 22758131 | 22758596 |
| chr9 | 22760041 | 22760286 |
| chr9 | 22761721 | 22761976 |
| chr9 | 22762551 | 22762706 |
| chr9 | 22784261 | 22784596 |
| chr9 | 22792031 | 22792196 |
| chr9 | 22792611 | 22792836 |
| chr9 | 22829621 | 22829746 |
| chr9 | 22994391 | 22994506 |
| chr9 | 23288661 | 23288786 |
| chr9 | 24004671 | 24004826 |
| chr9 | 24086001 | 24086116 |
| chr9 | 24583971 | 24584116 |
| chr9 | 24611481 | 24611606 |
| chr9 | 24611621 | 24611706 |
| chr9 | 24625031 | 24625196 |
| chr9 | 24706231 | 24706436 |
| chr9 | 24707071 | 24707346 |
| chr9 | 24865511 | 24865626 |
| chr9 | 25324731 | 25324906 |
| chr9 | 25340921 | 25341116 |
| chr9 | 26172651 | 26172796 |
| chr9 | 26856581 | 26856736 |
| chr9 | 26891091 | 26891186 |
| chr9 | 26898791 | 26898916 |
| chr9 | 27199311 | 27199516 |
| chr9 | 27272901 | 27273086 |
| chr9 | 27396581 | 27396736 |
| chr9 | 27408981 | 27409176 |
| chr9 | 27420051 | 27420326 |
| chr9 | 27562931 | 27563066 |
| chr9 | 27674971 | 27675066 |
| chr9 | 27695001 | 27695196 |
| chr9 | 27695371 | 27695446 |
| chr9 | 27761301 | 27761406 |
| chr9 | 27903551 | 27903706 |
| chr9 | 28086211 | 28086356 |
| chr9 | 28214841 | 28214986 |
| chr9 | 28528341 | 28528456 |
| chr9 | 28600731 | 28600826 |
| chr9 | 29061761 | 29061976 |
| chr9 | 29102231 | 29102676 |
| chr9 | 29177951 | 29178046 |
| chr9 | 29264091 | 29264266 |
| chr9 | 29264371 | 29264476 |
| chr9 | 29391181 | 29391356 |
| chr9 | 29394891 | 29395036 |

|      |          |          |
|------|----------|----------|
| chr9 | 29405401 | 29405486 |
| chr9 | 29408231 | 29408366 |
| chr9 | 29551881 | 29552046 |
| chr9 | 29615161 | 29615296 |
| chr9 | 29615371 | 29615466 |
| chr9 | 29615731 | 29615886 |
| chr9 | 29615981 | 29616086 |
| chr9 | 29687471 | 29687616 |
| chr9 | 30174661 | 30174776 |
| chr9 | 30195011 | 30195106 |
| chr9 | 30514931 | 30515046 |
| chr9 | 30558311 | 30558426 |
| chr9 | 30558791 | 30558926 |
| chr9 | 30560731 | 30560886 |
| chr9 | 30666041 | 30666136 |
| chr9 | 30870891 | 30871036 |
| chr9 | 30931251 | 30931436 |
| chr9 | 30962251 | 30962366 |
| chr9 | 31005741 | 31005856 |
| chr9 | 31023421 | 31023646 |
| chr9 | 31086051 | 31086226 |
| chr9 | 31433241 | 31433386 |
| chr9 | 31434441 | 31434616 |
| chr9 | 31437521 | 31437666 |
| chr9 | 31437751 | 31438076 |
| chr9 | 31438271 | 31438406 |
| chr9 | 31447531 | 31447686 |
| chr9 | 31514581 | 31514736 |
| chr9 | 31745441 | 31745536 |
| chr9 | 32041371 | 32041556 |
| chr9 | 32052521 | 32052666 |
| chr9 | 32224901 | 32225086 |
| chr9 | 32234621 | 32234906 |
| chr9 | 32308311 | 32308436 |
| chr9 | 32459671 | 32459796 |
| chr9 | 32465401 | 32465716 |
| chr9 | 32466171 | 32466296 |
| chr9 | 32481371 | 32481496 |
| chr9 | 32538201 | 32538306 |
| chr9 | 32538951 | 32539086 |
| chr9 | 32584961 | 32585116 |
| chr9 | 32690731 | 32690866 |
| chr9 | 32750501 | 32750686 |
| chr9 | 32971881 | 32972206 |
| chr9 | 32983481 | 32983636 |
| chr9 | 33608221 | 33608376 |
| chr9 | 33651301 | 33651466 |
| chr9 | 33806671 | 33806846 |
| chr9 | 33952321 | 33952456 |
| chr9 | 33953691 | 33953866 |
| chr9 | 33953871 | 33954026 |
| chr9 | 34016921 | 34017086 |
| chr9 | 34209851 | 34209976 |

|      |          |          |
|------|----------|----------|
| chr9 | 34269941 | 34270216 |
| chr9 | 34270281 | 34270366 |
| chr9 | 34275811 | 34275936 |
| chr9 | 34388121 | 34388256 |
| chr9 | 34454121 | 34454286 |
| chr9 | 34472221 | 34472356 |
| chr9 | 34510761 | 34510906 |
| chr9 | 34525841 | 34525946 |
| chr9 | 34545771 | 34545916 |
| chr9 | 34547901 | 34547996 |
| chr9 | 34574251 | 34574416 |
| chr9 | 34889971 | 34890116 |
| chr9 | 35066661 | 35066826 |
| chr9 | 35067031 | 35067216 |
| chr9 | 35067311 | 35067446 |
| chr9 | 35068241 | 35068406 |
| chr9 | 35068621 | 35068716 |
| chr9 | 35076421 | 35076556 |
| chr9 | 35078581 | 35078756 |
| chr9 | 35081001 | 35081176 |
| chr9 | 35094091 | 35094216 |
| chr9 | 35096271 | 35096446 |
| chr9 | 35111481 | 35111606 |
| chr9 | 35122021 | 35122336 |
| chr9 | 35150401 | 35150556 |
| chr9 | 35192311 | 35192446 |
| chr9 | 35193451 | 35193686 |
| chr9 | 35217191 | 35217346 |
| chr9 | 35217571 | 35217806 |
| chr9 | 35243151 | 35243316 |
| chr9 | 36690671 | 36690806 |
| chr9 | 36691031 | 36691246 |
| chr9 | 36723071 | 36723186 |
| chr9 | 36725181 | 36725376 |
| chr9 | 36751661 | 36751846 |
| chr9 | 36751991 | 36752166 |
| chr9 | 36757861 | 36758066 |
| chr9 | 36760611 | 36760796 |
| chr9 | 36761651 | 36761846 |
| chr9 | 36778311 | 36778506 |
| chr9 | 36779251 | 36779446 |
| chr9 | 36799491 | 36799676 |
| chr9 | 36800731 | 36800886 |
| chr9 | 36839541 | 36839666 |
| chr9 | 36843061 | 36843216 |
| chr9 | 36844021 | 36844266 |
| chr9 | 36850931 | 36851086 |
| chr9 | 36953721 | 36953856 |
| chr9 | 37109441 | 37109636 |
| chr9 | 37317831 | 37317956 |
| chr9 | 37794841 | 37794956 |
| chr9 | 39979981 | 39980136 |
| chr9 | 40063471 | 40063596 |

|      |          |          |
|------|----------|----------|
| chr9 | 40071781 | 40071916 |
| chr9 | 40083791 | 40084076 |
| chr9 | 40097381 | 40097476 |
| chr9 | 40122201 | 40122366 |
| chr9 | 40217421 | 40217576 |
| chr9 | 40368201 | 40368376 |
| chr9 | 40368631 | 40368796 |
| chr9 | 40368801 | 40368966 |
| chr9 | 40377711 | 40377866 |
| chr9 | 40378321 | 40378506 |
| chr9 | 40389411 | 40389566 |
| chr9 | 40472141 | 40472296 |
| chr9 | 40521521 | 40521696 |
| chr9 | 40678761 | 40678896 |
| chr9 | 40762791 | 40762916 |
| chr9 | 40881241 | 40881336 |
| chr9 | 40918191 | 40918366 |
| chr9 | 40978591 | 40978786 |
| chr9 | 41024611 | 41024736 |
| chr9 | 41078061 | 41078206 |
| chr9 | 41079721 | 41079836 |
| chr9 | 41086321 | 41086446 |
| chr9 | 41116321 | 41116436 |
| chr9 | 41116441 | 41116646 |
| chr9 | 41152161 | 41152266 |
| chr9 | 41336341 | 41336456 |
| chr9 | 41357811 | 41357936 |
| chr9 | 41361701 | 41361906 |
| chr9 | 41363551 | 41363766 |
| chr9 | 41364381 | 41364496 |
| chr9 | 41406871 | 41407016 |
| chr9 | 41555431 | 41555536 |
| chr9 | 41641671 | 41641806 |
| chr9 | 41686691 | 41686816 |
| chr9 | 41686821 | 41687026 |
| chr9 | 41687031 | 41687206 |
| chr9 | 41687371 | 41687476 |
| chr9 | 41804091 | 41804226 |
| chr9 | 41804541 | 41804746 |
| chr9 | 41867721 | 41867846 |
| chr9 | 41961381 | 41961536 |
| chr9 | 41970231 | 41970346 |
| chr9 | 41981991 | 41982186 |
| chr9 | 41982201 | 41982336 |
| chr9 | 41982511 | 41982676 |
| chr9 | 42106971 | 42107126 |
| chr9 | 42107241 | 42107326 |
| chr9 | 42157421 | 42157626 |
| chr9 | 42179781 | 42179906 |
| chr9 | 42218581 | 42218696 |
| chr9 | 42281661 | 42281826 |
| chr9 | 42285031 | 42285196 |
| chr9 | 42337611 | 42337766 |

|      |          |          |
|------|----------|----------|
| chr9 | 42388241 | 42388326 |
| chr9 | 42505891 | 42506116 |
| chr9 | 42511201 | 42511416 |
| chr9 | 42527081 | 42527316 |
| chr9 | 42527891 | 42528206 |
| chr9 | 42529021 | 42529246 |
| chr9 | 42529911 | 42530296 |
| chr9 | 42530391 | 42530486 |
| chr9 | 42536261 | 42536436 |
| chr9 | 42541401 | 42541546 |
| chr9 | 42637381 | 42637576 |
| chr9 | 42640641 | 42640776 |
| chr9 | 42647841 | 42648036 |
| chr9 | 42659681 | 42659856 |
| chr9 | 42678381 | 42678506 |
| chr9 | 42693611 | 42693886 |
| chr9 | 42708051 | 42708216 |
| chr9 | 42836371 | 42836516 |
| chr9 | 42983271 | 42983546 |
| chr9 | 43033211 | 43033346 |
| chr9 | 43033361 | 43033566 |
| chr9 | 43072381 | 43072516 |
| chr9 | 43110161 | 43110336 |
| chr9 | 43300551 | 43300716 |
| chr9 | 43368541 | 43368916 |
| chr9 | 43412351 | 43412476 |
| chr9 | 43412871 | 43412966 |
| chr9 | 43442781 | 43442906 |
| chr9 | 43450691 | 43450806 |
| chr9 | 43476061 | 43476186 |
| chr9 | 43505571 | 43505806 |
| chr9 | 43505851 | 43506046 |
| chr9 | 43615021 | 43615196 |
| chr9 | 43655001 | 43655236 |
| chr9 | 43668651 | 43668866 |
| chr9 | 43680191 | 43680336 |
| chr9 | 43685151 | 43685336 |
| chr9 | 43696611 | 43696706 |
| chr9 | 43744641 | 43744886 |
| chr9 | 43819021 | 43819166 |
| chr9 | 43870931 | 43871116 |
| chr9 | 44250901 | 44251176 |
| chr9 | 44316761 | 44316926 |
| chr9 | 44346011 | 44346136 |
| chr9 | 44934101 | 44934186 |
| chr9 | 45022081 | 45022216 |
| chr9 | 45131441 | 45131566 |
| chr9 | 45208261 | 45208426 |
| chr9 | 45415821 | 45416286 |
| chr9 | 45416301 | 45416456 |
| chr9 | 45417221 | 45417406 |
| chr9 | 45417481 | 45417746 |
| chr9 | 45441781 | 45441876 |

|      |          |          |
|------|----------|----------|
| chr9 | 45752051 | 45752186 |
| chr9 | 45802731 | 45802826 |
| chr9 | 45805261 | 45805366 |
| chr9 | 45831691 | 45831776 |
| chr9 | 45861761 | 45861916 |
| chr9 | 45866991 | 45867196 |
| chr9 | 46103511 | 46103706 |
| chr9 | 46103791 | 46103956 |
| chr9 | 46182081 | 46182176 |
| chr9 | 46218331 | 46218546 |
| chr9 | 46227541 | 46227676 |
| chr9 | 46246461 | 46246606 |
| chr9 | 46250501 | 46250626 |
| chr9 | 46361591 | 46361836 |
| chr9 | 46363361 | 46363526 |
| chr9 | 46592461 | 46592656 |
| chr9 | 46720031 | 46720286 |
| chr9 | 46917381 | 46917546 |
| chr9 | 46987171 | 46987326 |
| chr9 | 47058861 | 47059026 |
| chr9 | 47084101 | 47084236 |
| chr9 | 47139001 | 47139166 |
| chr9 | 47151461 | 47151616 |
| chr9 | 47256911 | 47257356 |
| chr9 | 47289691 | 47289836 |
| chr9 | 47290621 | 47290826 |
| chr9 | 47296661 | 47296796 |
| chr9 | 47297231 | 47297436 |
| chr9 | 47372431 | 47372736 |
| chr9 | 47392081 | 47392196 |
| chr9 | 47433771 | 47433916 |
| chr9 | 47474201 | 47474316 |
| chr9 | 47513891 | 47514106 |
| chr9 | 47516221 | 47516326 |
| chr9 | 47589551 | 47589706 |
| chr9 | 47590511 | 47590686 |
| chr9 | 47599141 | 47599306 |
| chr9 | 47599971 | 47600126 |
| chr9 | 47602171 | 47602436 |
| chr9 | 47607561 | 47607726 |
| chr9 | 47645241 | 47645406 |
| chr9 | 47645791 | 47645986 |
| chr9 | 47646051 | 47646456 |
| chr9 | 47646491 | 47646596 |
| chr9 | 47652981 | 47653096 |
| chr9 | 47676381 | 47676476 |
| chr9 | 47699891 | 47700076 |
| chr9 | 47725141 | 47725496 |
| chr9 | 47865411 | 47865596 |
| chr9 | 48400821 | 48400986 |
| chr9 | 48401411 | 48401576 |
| chr9 | 48414981 | 48415096 |
| chr9 | 48415151 | 48415276 |

|      |          |          |
|------|----------|----------|
| chr9 | 48426401 | 48426646 |
| chr9 | 48426741 | 48426906 |
| chr9 | 48444811 | 48445016 |
| chr9 | 48446611 | 48446806 |
| chr9 | 48446821 | 48446986 |
| chr9 | 48447511 | 48447676 |
| chr9 | 48448771 | 48449056 |
| chr9 | 48452641 | 48452766 |
| chr9 | 48453041 | 48453216 |
| chr9 | 48459551 | 48459666 |
| chr9 | 48485821 | 48485916 |
| chr9 | 48492521 | 48492626 |
| chr9 | 48509421 | 48509556 |
| chr9 | 48509661 | 48509846 |
| chr9 | 48510211 | 48510356 |
| chr9 | 48534681 | 48534856 |
| chr9 | 48548311 | 48548456 |
| chr9 | 48548501 | 48548776 |
| chr9 | 48571571 | 48571726 |
| chr9 | 48590021 | 48590176 |
| chr9 | 48714211 | 48714356 |
| chr9 | 48775871 | 48775996 |
| chr9 | 48839271 | 48839396 |
| chr9 | 48861151 | 48861276 |
| chr9 | 49279871 | 49280026 |
| chr9 | 49388271 | 49388406 |
| chr9 | 49417431 | 49417516 |
| chr9 | 49428821 | 49428976 |
| chr9 | 49437551 | 49437726 |
| chr9 | 49653191 | 49653296 |
| chr9 | 49676331 | 49676456 |
| chr9 | 49702621 | 49702886 |
| chr9 | 49714901 | 49715126 |
| chr9 | 49783761 | 49783936 |
| chr9 | 50006321 | 50006436 |
| chr9 | 50065311 | 50065486 |
| chr9 | 50228151 | 50228276 |
| chr9 | 50445001 | 50445096 |
| chr9 | 50449231 | 50449376 |
| chr9 | 50509231 | 50509336 |
| chr9 | 50606141 | 50606256 |
| chr9 | 50606321 | 50606816 |
| chr9 | 51065241 | 51065406 |
| chr9 | 51116431 | 51116556 |
| chr9 | 51194131 | 51194276 |
| chr9 | 51406401 | 51406596 |
| chr9 | 51487691 | 51487806 |
| chr9 | 51680501 | 51680626 |
| chr9 | 51781141 | 51781296 |
| chr9 | 51905781 | 51905926 |
| chr9 | 51917431 | 51917686 |
| chr9 | 51992961 | 51993086 |
| chr9 | 52037641 | 52037826 |



|      |          |          |
|------|----------|----------|
| chr9 | 52177881 | 52177986 |
| chr9 | 52511611 | 52511796 |
| chr9 | 53103501 | 53103686 |
| chr9 | 53280041 | 53280306 |
| chr9 | 53592871 | 53593016 |
| chr9 | 53593331 | 53593506 |
| chr9 | 53729171 | 53729386 |
| chr9 | 54543971 | 54544386 |
| chr9 | 54550321 | 54550546 |
| chr9 | 54550671 | 54551486 |
| chr9 | 54552171 | 54552286 |
| chr9 | 54608401 | 54608556 |
| chr9 | 54651681 | 54651866 |
| chr9 | 54653871 | 54654076 |
| chr9 | 54866861 | 54867016 |
| chr9 | 54881321 | 54881436 |
| chr9 | 54881821 | 54881926 |
| chr9 | 54890281 | 54890416 |
| chr9 | 54898981 | 54899186 |
| chr9 | 55153491 | 55153626 |
| chr9 | 55222361 | 55222516 |
| chr9 | 55222611 | 55222796 |
| chr9 | 55222851 | 55222986 |
| chr9 | 55246251 | 55246386 |
| chr9 | 55363981 | 55364076 |
| chr9 | 55406941 | 55407186 |
| chr9 | 55899331 | 55899476 |
| chr9 | 55903021 | 55903426 |
| chr9 | 56012131 | 56012236 |
| chr9 | 56012251 | 56012396 |
| chr9 | 56101031 | 56101146 |
| chr9 | 56101601 | 56101746 |
| chr9 | 56263041 | 56263406 |
| chr9 | 56263421 | 56263646 |
| chr9 | 56371021 | 56371156 |
| chr9 | 56410971 | 56411086 |
| chr9 | 56420891 | 56421116 |
| chr9 | 56569631 | 56569756 |
| chr9 | 56739301 | 56739406 |
| chr9 | 57063241 | 57063426 |
| chr9 | 57065761 | 57065916 |
| chr9 | 57066311 | 57066476 |
| chr9 | 57068531 | 57068686 |
| chr9 | 57077031 | 57077456 |
| chr9 | 57081941 | 57082146 |
| chr9 | 57231061 | 57231166 |
| chr9 | 57295381 | 57295576 |
| chr9 | 57299141 | 57299276 |
| chr9 | 57300061 | 57300196 |
| chr9 | 57300321 | 57300446 |
| chr9 | 57494211 | 57494356 |
| chr9 | 57597181 | 57597276 |
| chr9 | 57602021 | 57602156 |

|      |          |          |
|------|----------|----------|
| chr9 | 57837071 | 57837256 |
| chr9 | 57840801 | 57841006 |
| chr9 | 57843021 | 57843346 |
| chr9 | 57849851 | 57850236 |
| chr9 | 57879271 | 57879376 |
| chr9 | 57926551 | 57926696 |
| chr9 | 57927071 | 57927246 |
| chr9 | 57927291 | 57927586 |
| chr9 | 57929971 | 57930256 |
| chr9 | 57932431 | 57932616 |
| chr9 | 57932931 | 57933026 |
| chr9 | 58092801 | 58092996 |
| chr9 | 58144131 | 58144236 |
| chr9 | 58144581 | 58145086 |
| chr9 | 58172351 | 58172456 |
| chr9 | 58237981 | 58238156 |
| chr9 | 58481671 | 58481836 |
| chr9 | 58515501 | 58515586 |
| chr9 | 58863671 | 58863886 |
| chr9 | 58951181 | 58951306 |
| chr9 | 58961191 | 58961326 |
| chr9 | 58961731 | 58961926 |
| chr9 | 58987261 | 58987616 |
| chr9 | 59058101 | 59058236 |
| chr9 | 59058251 | 59058366 |
| chr9 | 59069861 | 59070046 |
| chr9 | 59533511 | 59533636 |
| chr9 | 59535241 | 59535396 |
| chr9 | 59938591 | 59938726 |
| chr9 | 59958781 | 59958916 |
| chr9 | 59989931 | 59990046 |
| chr9 | 59990261 | 59990326 |
| chr9 | 60030191 | 60030286 |
| chr9 | 60078021 | 60078336 |
| chr9 | 60079361 | 60079546 |
| chr9 | 60083371 | 60083516 |
| chr9 | 60145211 | 60145336 |
| chr9 | 60162271 | 60162726 |
| chr9 | 60311231 | 60311826 |
| chr9 | 60315281 | 60315386 |
| chr9 | 60315741 | 60315856 |
| chr9 | 60316071 | 60316176 |
| chr9 | 60324651 | 60324966 |
| chr9 | 60360511 | 60360676 |
| chr9 | 60408281 | 60408426 |
| chr9 | 60497921 | 60498236 |
| chr9 | 60541441 | 60541556 |
| chr9 | 60611771 | 60611966 |
| chr9 | 60675071 | 60675196 |
| chr9 | 60697461 | 60697586 |
| chr9 | 60749461 | 60749586 |
| chr9 | 60814951 | 60815076 |
| chr9 | 60846841 | 60846986 |

|      |          |          |
|------|----------|----------|
| chr9 | 60868931 | 60869206 |
| chr9 | 60900641 | 60900806 |
| chr9 | 60909701 | 60909856 |
| chr9 | 60910161 | 60910336 |
| chr9 | 61018121 | 61018236 |
| chr9 | 61025681 | 61026036 |
| chr9 | 61039741 | 61039886 |
| chr9 | 61055411 | 61055506 |
| chr9 | 61057861 | 61058016 |
| chr9 | 61059421 | 61059576 |
| chr9 | 61060041 | 61060166 |
| chr9 | 61060171 | 61060546 |
| chr9 | 61077441 | 61077576 |
| chr9 | 61087721 | 61087866 |
| chr9 | 61113501 | 61113746 |
| chr9 | 61113761 | 61113986 |
| chr9 | 61123871 | 61124046 |
| chr9 | 61124321 | 61124446 |
| chr9 | 61124451 | 61124566 |
| chr9 | 61135171 | 61135536 |
| chr9 | 61150221 | 61150356 |
| chr9 | 61163981 | 61164136 |
| chr9 | 61175811 | 61176066 |
| chr9 | 61176271 | 61176426 |
| chr9 | 61176511 | 61176776 |
| chr9 | 61176961 | 61177136 |
| chr9 | 61187291 | 61187406 |
| chr9 | 61187431 | 61187576 |
| chr9 | 61270071 | 61270276 |
| chr9 | 61326851 | 61326936 |
| chr9 | 61371421 | 61371536 |
| chr9 | 61371721 | 61372016 |
| chr9 | 61372211 | 61372346 |
| chr9 | 61467831 | 61467916 |
| chr9 | 61493411 | 61493646 |
| chr9 | 61493701 | 61493836 |
| chr9 | 61515001 | 61515176 |
| chr9 | 61606521 | 61606696 |
| chr9 | 61607101 | 61607306 |
| chr9 | 61639491 | 61639666 |
| chr9 | 61670401 | 61670546 |
| chr9 | 61671611 | 61671676 |
| chr9 | 61702231 | 61702516 |
| chr9 | 61750201 | 61750476 |
| chr9 | 61811411 | 61811526 |
| chr9 | 61819601 | 61819786 |
| chr9 | 61978831 | 61978926 |
| chr9 | 62020601 | 62020856 |
| chr9 | 62035641 | 62035816 |
| chr9 | 62038251 | 62038366 |
| chr9 | 62041991 | 62042166 |
| chr9 | 62161751 | 62161916 |
| chr9 | 62162031 | 62162266 |

|      |          |          |
|------|----------|----------|
| chr9 | 62162931 | 62163056 |
| chr9 | 62165941 | 62166076 |
| chr9 | 62167471 | 62167596 |
| chr9 | 62267161 | 62267296 |
| chr9 | 62355171 | 62355326 |
| chr9 | 62497091 | 62497236 |
| chr9 | 62523401 | 62523506 |
| chr9 | 62655991 | 62656126 |
| chr9 | 62669491 | 62669686 |
| chr9 | 62775221 | 62775406 |
| chr9 | 62872961 | 62873166 |
| chr9 | 62873421 | 62873496 |
| chr9 | 62889371 | 62889616 |
| chr9 | 62913631 | 62913846 |
| chr9 | 62956911 | 62957126 |
| chr9 | 62991451 | 62991546 |
| chr9 | 62994221 | 62994376 |
| chr9 | 62995251 | 62995456 |
| chr9 | 62995921 | 62996126 |
| chr9 | 63015971 | 63016076 |
| chr9 | 63028291 | 63028476 |
| chr9 | 63032501 | 63032706 |
| chr9 | 63038741 | 63038846 |
| chr9 | 63040101 | 63040236 |
| chr9 | 63091721 | 63092046 |
| chr9 | 63092201 | 63092436 |
| chr9 | 63154351 | 63154596 |
| chr9 | 63328851 | 63329016 |
| chr9 | 63348131 | 63348266 |
| chr9 | 63370051 | 63370206 |
| chr9 | 63387231 | 63387366 |
| chr9 | 63409351 | 63409476 |
| chr9 | 63411341 | 63411476 |
| chr9 | 63513631 | 63513776 |
| chr9 | 63514661 | 63514996 |
| chr9 | 63543031 | 63543096 |
| chr9 | 63546091 | 63546176 |
| chr9 | 63547801 | 63547936 |
| chr9 | 63548341 | 63548516 |
| chr9 | 63548591 | 63548796 |
| chr9 | 63690371 | 63690526 |
| chr9 | 63690751 | 63690856 |
| chr9 | 63694641 | 63694796 |
| chr9 | 63761111 | 63761246 |
| chr9 | 63763501 | 63763856 |
| chr9 | 63763921 | 63764116 |
| chr9 | 63767351 | 63767496 |
| chr9 | 63778401 | 63778586 |
| chr9 | 63814111 | 63814256 |
| chr9 | 63814301 | 63814446 |
| chr9 | 63843071 | 63843226 |
| chr9 | 64111871 | 64112026 |
| chr9 | 64112111 | 64112266 |

|      |          |          |
|------|----------|----------|
| chr9 | 64113331 | 64113436 |
| chr9 | 64114211 | 64114336 |
| chr9 | 64114371 | 64114516 |
| chr9 | 64169651 | 64169836 |
| chr9 | 64259491 | 64259806 |
| chr9 | 64271051 | 64271546 |
| chr9 | 64305911 | 64306066 |
| chr9 | 64328241 | 64328516 |
| chr9 | 64331851 | 64331956 |
| chr9 | 64341121 | 64341456 |
| chr9 | 64360181 | 64360376 |
| chr9 | 64372841 | 64372966 |
| chr9 | 64374251 | 64374406 |
| chr9 | 64389891 | 64389986 |
| chr9 | 64392321 | 64392516 |
| chr9 | 64417551 | 64417686 |
| chr9 | 64431871 | 64432066 |
| chr9 | 64442041 | 64442336 |
| chr9 | 64455901 | 64456206 |
| chr9 | 64457391 | 64457666 |
| chr9 | 64485501 | 64485596 |
| chr9 | 64517631 | 64517716 |
| chr9 | 64518251 | 64518386 |
| chr9 | 64943951 | 64944116 |
| chr9 | 64949001 | 64949096 |
| chr9 | 64970901 | 64971016 |
| chr9 | 64978441 | 64978576 |
| chr9 | 64978651 | 64978796 |
| chr9 | 64978821 | 64978976 |
| chr9 | 65161721 | 65162046 |
| chr9 | 65184611 | 65184826 |
| chr9 | 65265761 | 65265856 |
| chr9 | 65574471 | 65574616 |
| chr9 | 65672821 | 65672956 |
| chr9 | 65984551 | 65984656 |
| chr9 | 66074831 | 66074996 |
| chr9 | 66418951 | 66419196 |
| chr9 | 66733271 | 66733446 |
| chr9 | 66733691 | 66733866 |
| chr9 | 66808151 | 66808266 |
| chr9 | 66899081 | 66899206 |
| chr9 | 66901171 | 66901296 |
| chr9 | 66905041 | 66905226 |
| chr9 | 66906151 | 66906306 |
| chr9 | 66913231 | 66913426 |
| chr9 | 66913961 | 66914166 |
| chr9 | 67006561 | 67006666 |
| chr9 | 67333741 | 67333916 |
| chr9 | 67339071 | 67339246 |
| chr9 | 67406721 | 67406876 |
| chr9 | 67407041 | 67407136 |
| chr9 | 67427801 | 67427956 |
| chr9 | 67428681 | 67428776 |

|      |          |          |
|------|----------|----------|
| chr9 | 67598591 | 67598736 |
| chr9 | 67676331 | 67676516 |
| chr9 | 67837661 | 67837776 |
| chr9 | 67837861 | 67838036 |
| chr9 | 67884221 | 67884376 |
| chr9 | 67935251 | 67935386 |
| chr9 | 68418621 | 68418756 |
| chr9 | 68494431 | 68494536 |
| chr9 | 68533541 | 68533656 |
| chr9 | 68612441 | 68612626 |
| chr9 | 68735091 | 68735316 |
| chr9 | 68747201 | 68747316 |
| chr9 | 68903791 | 68903916 |
| chr9 | 68983181 | 68983346 |
| chr9 | 69011761 | 69011886 |
| chr9 | 69017451 | 69017556 |
| chr9 | 69031541 | 69031716 |
| chr9 | 69042891 | 69043176 |
| chr9 | 69074531 | 69074666 |
| chr9 | 69123231 | 69123306 |
| chr9 | 69144851 | 69144976 |
| chr9 | 69162111 | 69162296 |
| chr9 | 69266551 | 69266706 |
| chr9 | 69367941 | 69368066 |
| chr9 | 69374601 | 69374776 |
| chr9 | 69374811 | 69374966 |
| chr9 | 69504691 | 69504796 |
| chr9 | 69512361 | 69512516 |
| chr9 | 69514601 | 69514826 |
| chr9 | 69517811 | 69518056 |
| chr9 | 69533551 | 69533686 |
| chr9 | 69601781 | 69601906 |
| chr9 | 69601941 | 69602146 |
| chr9 | 69688441 | 69688546 |
| chr9 | 69690321 | 69690416 |
| chr9 | 69706551 | 69707196 |
| chr9 | 69847131 | 69847266 |
| chr9 | 69852111 | 69852316 |
| chr9 | 69854981 | 69855116 |
| chr9 | 69962261 | 69962356 |
| chr9 | 70040751 | 70040866 |
| chr9 | 70115501 | 70115606 |
| chr9 | 70607081 | 70607246 |
| chr9 | 70646821 | 70646976 |
| chr9 | 70692611 | 70692806 |
| chr9 | 70715661 | 70715826 |
| chr9 | 70770681 | 70770836 |
| chr9 | 70816781 | 70816876 |
| chr9 | 70967211 | 70967426 |
| chr9 | 71026811 | 71026986 |
| chr9 | 71028661 | 71028956 |
| chr9 | 71040711 | 71040856 |
| chr9 | 71042901 | 71043076 |

|      |          |          |
|------|----------|----------|
| chr9 | 71044061 | 71044166 |
| chr9 | 71047081 | 71047226 |
| chr9 | 71058941 | 71059056 |
| chr9 | 71105781 | 71105886 |
| chr9 | 71159411 | 71159486 |
| chr9 | 71188771 | 71188906 |
| chr9 | 71291341 | 71291716 |
| chr9 | 71326031 | 71326186 |
| chr9 | 71427791 | 71427936 |
| chr9 | 71473241 | 71473446 |
| chr9 | 71475671 | 71475796 |
| chr9 | 71555641 | 71555786 |
| chr9 | 71602721 | 71602886 |
| chr9 | 71633771 | 71633906 |
| chr9 | 71662021 | 71662206 |
| chr9 | 71662741 | 71662906 |
| chr9 | 71774671 | 71774906 |
| chr9 | 71800071 | 71800196 |
| chr9 | 71816421 | 71816566 |
| chr9 | 71954491 | 71954596 |
| chr9 | 72249901 | 72250076 |
| chr9 | 72464321 | 72464446 |
| chr9 | 72557351 | 72557626 |
| chr9 | 72572781 | 72573026 |
| chr9 | 72577791 | 72577926 |
| chr9 | 72578741 | 72578936 |
| chr9 | 72578991 | 72579496 |
| chr9 | 72580351 | 72580506 |
| chr9 | 72587591 | 72587796 |
| chr9 | 72590381 | 72590546 |
| chr9 | 72590601 | 72590786 |
| chr9 | 72599441 | 72599606 |
| chr9 | 72608211 | 72608396 |
| chr9 | 72609641 | 72609736 |
| chr9 | 72610761 | 72610946 |
| chr9 | 72611921 | 72612116 |
| chr9 | 72631521 | 72631656 |
| chr9 | 72671481 | 72671586 |
| chr9 | 72675151 | 72675516 |
| chr9 | 72678721 | 72678816 |
| chr9 | 72917841 | 72917926 |
| chr9 | 73059981 | 73060076 |
| chr9 | 73247971 | 73248126 |
| chr9 | 73468971 | 73469136 |
| chr9 | 73763541 | 73763686 |
| chr9 | 73945851 | 73945966 |
| chr9 | 73984071 | 73984216 |
| chr9 | 74073061 | 74073176 |
| chr9 | 74075271 | 74075366 |
| chr9 | 74077901 | 74078086 |
| chr9 | 74098671 | 74098806 |
| chr9 | 74128351 | 74128456 |
| chr9 | 74242161 | 74242326 |

|      |          |          |
|------|----------|----------|
| chr9 | 74653371 | 74653526 |
| chr9 | 75047131 | 75047376 |
| chr9 | 75210831 | 75211076 |
| chr9 | 75350781 | 75350996 |
| chr9 | 77126141 | 77126346 |
| chr9 | 77160221 | 77160366 |
| chr9 | 77163801 | 77163916 |
| chr9 | 77212921 | 77213086 |
| chr9 | 77213121 | 77213756 |
| chr9 | 77224571 | 77224666 |
| chr9 | 77224701 | 77224836 |
| chr9 | 77238751 | 77239066 |
| chr9 | 77288381 | 77288596 |
| chr9 | 77288781 | 77288916 |
| chr9 | 77295011 | 77295106 |
| chr9 | 77298001 | 77298176 |
| chr9 | 77683611 | 77683776 |
| chr9 | 77707191 | 77707476 |
| chr9 | 77713231 | 77713366 |
| chr9 | 77806961 | 77807216 |
| chr9 | 77832461 | 77832566 |
| chr9 | 77836111 | 77836246 |
| chr9 | 77901281 | 77901426 |
| chr9 | 77901541 | 77901706 |
| chr9 | 77912541 | 77912696 |
| chr9 | 77921391 | 77921486 |
| chr9 | 78292291 | 78292446 |
| chr9 | 78324101 | 78324266 |
| chr9 | 78424941 | 78425086 |
| chr9 | 78843581 | 78843776 |
| chr9 | 79476001 | 79476196 |
| chr9 | 79570281 | 79570446 |
| chr9 | 79609271 | 79609446 |
| chr9 | 79615851 | 79616106 |
| chr9 | 79661221 | 79661376 |
| chr9 | 79661441 | 79661756 |
| chr9 | 79661891 | 79661986 |
| chr9 | 79665881 | 79666076 |
| chr9 | 79676741 | 79676876 |
| chr9 | 79704791 | 79704926 |
| chr9 | 79752511 | 79752706 |
| chr9 | 79763511 | 79763616 |
| chr9 | 79958111 | 79958216 |
| chr9 | 79996051 | 79996176 |
| chr9 | 80465551 | 80465686 |
| chr9 | 82628631 | 82628756 |
| chr9 | 82661681 | 82661836 |
| chr9 | 82895421 | 82895516 |
| chr9 | 82993961 | 82994106 |
| chr9 | 83123461 | 83123696 |
| chr9 | 83333411 | 83333546 |
| chr9 | 83399011 | 83399146 |
| chr9 | 83402921 | 83403076 |



|      |          |          |
|------|----------|----------|
| chr9 | 83461431 | 83461496 |
| chr9 | 83483241 | 83483776 |
| chr9 | 83737931 | 83738066 |
| chr9 | 83738191 | 83738366 |
| chr9 | 83764451 | 83764606 |
| chr9 | 83807591 | 83807706 |
| chr9 | 83829331 | 83829796 |
| chr9 | 84205631 | 84205736 |
| chr9 | 85122211 | 85122536 |
| chr9 | 85207561 | 85207706 |
| chr9 | 85254381 | 85254516 |
| chr9 | 85254561 | 85254626 |
| chr9 | 85293561 | 85293816 |
| chr9 | 85470711 | 85470876 |
| chr9 | 85886851 | 85887036 |
| chr9 | 85984591 | 85984826 |
| chr9 | 86067011 | 86067166 |
| chr9 | 86597201 | 86597346 |
| chr9 | 87501421 | 87501556 |
| chr9 | 88041311 | 88041436 |
| chr9 | 89202751 | 89202876 |
| chr9 | 89294691 | 89294986 |
| chr9 | 90058491 | 90058636 |
| chr9 | 90490891 | 90491116 |
| chr9 | 90635091 | 90635236 |
| chr9 | 91150771 | 91151076 |
| chr9 | 91214021 | 91214146 |
| chr9 | 91218521 | 91218626 |
| chr9 | 91275581 | 91275726 |
| chr9 | 92059061 | 92059156 |
| chr9 | 92070631 | 92070726 |
| chr9 | 92355571 | 92355676 |
| chr9 | 92401551 | 92401706 |
| chr9 | 93905681 | 93905786 |
| chr9 | 94217531 | 94217686 |
| chr9 | 94218131 | 94218366 |
| chr9 | 94219941 | 94220086 |
| chr9 | 94264741 | 94264836 |
| chr9 | 94265511 | 94265676 |
| chr9 | 94501041 | 94501206 |
| chr9 | 94501731 | 94501846 |
| chr9 | 94882161 | 94882316 |
| chr9 | 94883111 | 94883316 |
| chr9 | 95590031 | 95590236 |
| chr9 | 95611181 | 95611356 |
| chr9 | 96007811 | 96007916 |
| chr9 | 96069261 | 96069416 |
| chr9 | 96302711 | 96302806 |
| chr9 | 96315701 | 96316026 |
| chr9 | 96562101 | 96562236 |
| chr9 | 96691121 | 96691216 |
| chr9 | 96701051 | 96701216 |
| chr9 | 96788891 | 96788996 |

|      |           |           |
|------|-----------|-----------|
| chr9 | 96789201  | 96789326  |
| chr9 | 96790381  | 96790666  |
| chr9 | 96796471  | 96796726  |
| chr9 | 96799041  | 96799276  |
| chr9 | 97131551  | 97131666  |
| chr9 | 97229911  | 97230036  |
| chr9 | 97411051  | 97411206  |
| chr9 | 97451271  | 97451416  |
| chr9 | 97482121  | 97482356  |
| chr9 | 98161821  | 98161886  |
| chr9 | 98183731  | 98183966  |
| chr9 | 98184251  | 98184666  |
| chr9 | 98221011  | 98221176  |
| chr9 | 98239001  | 98239156  |
| chr9 | 98306731  | 98306856  |
| chr9 | 98308041  | 98308286  |
| chr9 | 98504601  | 98504736  |
| chr9 | 98504791  | 98504936  |
| chr9 | 98772121  | 98772316  |
| chr9 | 98907891  | 98908006  |
| chr9 | 98908011  | 98908186  |
| chr9 | 99020441  | 99020626  |
| chr9 | 99203761  | 99204006  |
| chr9 | 99607001  | 99607116  |
| chr9 | 99608571  | 99608886  |
| chr9 | 99609001  | 99609216  |
| chr9 | 99794161  | 99794256  |
| chr9 | 99803621  | 99803726  |
| chr9 | 99803811  | 99804016  |
| chr9 | 99804771  | 99804916  |
| chr9 | 100076481 | 100076646 |
| chr9 | 100081941 | 100082126 |
| chr9 | 100297821 | 100297976 |
| chr9 | 100388261 | 100388416 |
| chr9 | 100392181 | 100392346 |
| chr9 | 100426451 | 100426626 |
| chr9 | 100427941 | 100428056 |
| chr9 | 100826841 | 100827416 |
| chr9 | 100855601 | 100855716 |
| chr9 | 101213121 | 101213326 |
| chr9 | 101281771 | 101281896 |
| chr9 | 101357641 | 101357876 |
| chr9 | 101358021 | 101358156 |
| chr9 | 101459341 | 101459446 |
| chr9 | 101778291 | 101778416 |
| chr9 | 101801691 | 101801806 |
| chr9 | 101820451 | 101820566 |
| chr9 | 101998111 | 101998306 |
| chr9 | 102054141 | 102054226 |
| chr9 | 102117821 | 102118096 |
| chr9 | 102166831 | 102166966 |
| chr9 | 102291201 | 102291376 |
| chr9 | 102451271 | 102451416 |

|      |           |           |
|------|-----------|-----------|
| chr9 | 102499481 | 102500006 |
| chr9 | 102506021 | 102506406 |
| chr9 | 102506641 | 102506806 |
| chr9 | 102586311 | 102586446 |
| chr9 | 102614601 | 102614836 |
| chr9 | 102621881 | 102622076 |
| chr9 | 102636111 | 102636216 |
| chr9 | 102637691 | 102637846 |
| chr9 | 102697991 | 102698156 |
| chr9 | 102699481 | 102699606 |
| chr9 | 102838201 | 102838366 |
| chr9 | 102851201 | 102851306 |
| chr9 | 102865881 | 102866066 |
| chr9 | 102972601 | 102972746 |
| chr9 | 103226881 | 103227136 |
| chr9 | 103236871 | 103236976 |
| chr9 | 103237351 | 103237726 |
| chr9 | 103256861 | 103257016 |
| chr9 | 103271621 | 103271716 |
| chr9 | 103281221 | 103281446 |
| chr9 | 103301291 | 103301526 |
| chr9 | 103301711 | 103301886 |
| chr9 | 103302031 | 103302276 |
| chr9 | 103343931 | 103344056 |
| chr9 | 103381361 | 103381516 |
| chr9 | 103405881 | 103405986 |
| chr9 | 103409221 | 103409376 |
| chr9 | 103409551 | 103409666 |
| chr9 | 103486811 | 103487006 |
| chr9 | 103487051 | 103487426 |
| chr9 | 103511301 | 103511416 |
| chr9 | 103512311 | 103512526 |
| chr9 | 103639671 | 103639776 |
| chr9 | 103719341 | 103719566 |
| chr9 | 103748741 | 103748866 |
| chr9 | 103817071 | 103817176 |
| chr9 | 103959241 | 103959436 |
| chr9 | 103977101 | 103977346 |
| chr9 | 103981771 | 103981956 |
| chr9 | 103982171 | 103982256 |
| chr9 | 103982531 | 103982666 |
| chr9 | 104214081 | 104214246 |
| chr9 | 104264751 | 104264906 |
| chr9 | 104346841 | 104347006 |
| chr9 | 104489081 | 104489226 |
| chr9 | 104759521 | 104759676 |
| chr9 | 105347781 | 105347876 |
| chr9 | 105560151 | 105560316 |
| chr9 | 105560451 | 105560556 |
| chr9 | 106160661 | 106160836 |
| chr9 | 106229961 | 106230126 |
| chr9 | 106315161 | 106315306 |
| chr9 | 106424561 | 106424826 |

|      |           |           |
|------|-----------|-----------|
| chr9 | 107225461 | 107225656 |
| chr9 | 107228511 | 107228616 |
| chr9 | 107247841 | 107248006 |
| chr9 | 107255971 | 107256076 |
| chr9 | 107284621 | 107284846 |
| chr9 | 107307441 | 107307606 |
| chr9 | 107339541 | 107339696 |
| chr9 | 107399161 | 107399346 |
| chr9 | 107488231 | 107488346 |
| chr9 | 107490091 | 107490246 |
| chr9 | 107507071 | 107507206 |
| chr9 | 107581591 | 107581696 |
| chr9 | 107586041 | 107586206 |
| chr9 | 108561141 | 108561286 |
| chr9 | 108639471 | 108639606 |
| chr9 | 108640171 | 108640316 |
| chr9 | 108640491 | 108640586 |
| chr9 | 108814391 | 108814516 |
| chr9 | 108947831 | 108948266 |
| chr9 | 109799231 | 109799366 |
| chr9 | 109846831 | 109846996 |
| chr9 | 109864531 | 109864716 |
| chr9 | 109898611 | 109898736 |
| chr9 | 110100561 | 110100806 |
| chr9 | 110100861 | 110100956 |
| chr9 | 110138771 | 110138886 |
| chr9 | 110527251 | 110527386 |
| chr9 | 110580381 | 110580506 |
| chr9 | 110694881 | 110695026 |
| chr9 | 111052251 | 111052506 |
| chr9 | 111348381 | 111348496 |
| chr9 | 111478531 | 111478686 |
| chr9 | 111577391 | 111577486 |
| chr9 | 111662901 | 111662996 |
| chr9 | 111826621 | 111826706 |
| chr9 | 111868481 | 111868606 |
| chr9 | 111890261 | 111890436 |
| chr9 | 111976851 | 111976996 |
| chr9 | 112031391 | 112031496 |
| chr9 | 112032471 | 112032796 |
| chr9 | 113100621 | 113100726 |
| chr9 | 113227171 | 113227266 |
| chr9 | 113233481 | 113233746 |
| chr9 | 113237091 | 113237226 |
| chr9 | 113677521 | 113677666 |
| chr9 | 114379581 | 114379796 |
| chr9 | 114392691 | 114392796 |
| chr9 | 114393031 | 114393206 |
| chr9 | 114395651 | 114395866 |
| chr9 | 114397001 | 114397186 |
| chr9 | 114402271 | 114402456 |
| chr9 | 114403251 | 114403446 |
| chr9 | 114404351 | 114404486 |

|      |           |           |
|------|-----------|-----------|
| chr9 | 114453011 | 114453206 |
| chr9 | 114498471 | 114498566 |
| chr9 | 114647741 | 114647826 |
| chr9 | 114648321 | 114648476 |
| chr9 | 114656211 | 114656556 |
| chr9 | 114659851 | 114660046 |
| chr9 | 114704011 | 114704176 |
| chr9 | 114771151 | 114771266 |
| chr9 | 114883441 | 114883686 |
| chr9 | 114887091 | 114887166 |
| chr9 | 114937421 | 114937556 |
| chr9 | 114965971 | 114966066 |
| chr9 | 114966121 | 114966246 |
| chr9 | 114996521 | 114996796 |
| chr9 | 115060931 | 115061106 |
| chr9 | 115144941 | 115145056 |
| chr9 | 115240411 | 115240516 |
| chr9 | 115530561 | 115530676 |
| chr9 | 115537361 | 115537466 |
| chr9 | 115557231 | 115557386 |
| chr9 | 115655161 | 115655376 |
| chr9 | 116232061 | 116232336 |
| chr9 | 116232391 | 116232486 |
| chr9 | 116237701 | 116237866 |
| chr9 | 116618401 | 116618536 |
| chr9 | 116655701 | 116655876 |
| chr9 | 116768321 | 116768806 |
| chr9 | 116928101 | 116928266 |
| chr9 | 116928341 | 116928466 |
| chr9 | 116951201 | 116951456 |
| chr9 | 117005211 | 117005336 |
| chr9 | 117009831 | 117010016 |
| chr9 | 117011721 | 117011786 |
| chr9 | 117016041 | 117016176 |
| chr9 | 117021281 | 117021416 |
| chr9 | 117022851 | 117022996 |
| chr9 | 117066761 | 117066896 |
| chr9 | 117084111 | 117084286 |
| chr9 | 117092031 | 117092156 |
| chr9 | 117099351 | 117099476 |
| chr9 | 117213511 | 117213606 |
| chr9 | 117213651 | 117213796 |
| chr9 | 117221031 | 117221116 |
| chr9 | 117229051 | 117229266 |
| chr9 | 118242481 | 118242626 |
| chr9 | 118272111 | 118272256 |
| chr9 | 118293571 | 118293716 |
| chr9 | 118296281 | 118296406 |
| chr9 | 118304801 | 118305006 |
| chr9 | 118456411 | 118456536 |
| chr9 | 118537191 | 118537296 |
| chr9 | 118549821 | 118549946 |
| chr9 | 118663031 | 118663206 |

|      |           |           |
|------|-----------|-----------|
| chr9 | 118686711 | 118686836 |
| chr9 | 118709461 | 118709656 |
| chr9 | 118753281 | 118753436 |
| chr9 | 118777521 | 118777616 |
| chr9 | 118778261 | 118778556 |
| chr9 | 118788261 | 118788446 |
| chr9 | 118823961 | 118824086 |
| chr9 | 118824281 | 118824376 |
| chr9 | 118854051 | 118854206 |
| chr9 | 118870031 | 118870136 |
| chr9 | 118901301 | 118901466 |
| chr9 | 118903231 | 118903336 |
| chr9 | 119156221 | 119156356 |
| chr9 | 119224501 | 119224656 |
| chr9 | 119224771 | 119224866 |
| chr9 | 119267431 | 119267556 |
| chr9 | 119326491 | 119326696 |
| chr9 | 119396221 | 119396376 |
| chr9 | 119684571 | 119684656 |
| chr9 | 119998051 | 119998196 |
| chr9 | 120006031 | 120006166 |
| chr9 | 120007081 | 120007276 |
| chr9 | 120064511 | 120064636 |
| chr9 | 120064931 | 120065086 |
| chr9 | 120065451 | 120065716 |
| chr9 | 120068211 | 120068326 |
| chr9 | 120108491 | 120108776 |
| chr9 | 120121871 | 120121996 |
| chr9 | 120124441 | 120124706 |
| chr9 | 120124791 | 120124956 |
| chr9 | 120450651 | 120450906 |
| chr9 | 120501971 | 120502136 |
| chr9 | 120502351 | 120502626 |
| chr9 | 120502701 | 120502856 |
| chr9 | 120508901 | 120509036 |
| chr9 | 120602481 | 120602606 |
| chr9 | 120759451 | 120759576 |
| chr9 | 120775721 | 120775896 |
| chr9 | 120781281 | 120781426 |
| chr9 | 120954561 | 120954706 |
| chr9 | 121148691 | 121148916 |
| chr9 | 121150591 | 121150726 |
| chr9 | 121168411 | 121168646 |
| chr9 | 121183331 | 121183506 |
| chr9 | 121200131 | 121200356 |
| chr9 | 121201131 | 121201316 |
| chr9 | 121249081 | 121249256 |
| chr9 | 121249341 | 121249596 |
| chr9 | 121252011 | 121252236 |
| chr9 | 121252561 | 121252786 |
| chr9 | 121254701 | 121254876 |
| chr9 | 121266161 | 121266286 |
| chr9 | 121523111 | 121523206 |

|      |           |           |
|------|-----------|-----------|
| chr9 | 121730961 | 121731126 |
| chr9 | 121739351 | 121739546 |
| chr9 | 121972211 | 121972336 |
| chr9 | 122137261 | 122137376 |
| chr9 | 122163631 | 122163776 |
| chr9 | 122163851 | 122164006 |
| chr9 | 122508831 | 122509016 |
| chr9 | 123107551 | 123107656 |
| chr9 | 123157971 | 123158116 |
| chr9 | 123386961 | 123387186 |
| chr9 | 123776871 | 123776986 |
| chr8 | 3348441   | 3348566   |
| chr8 | 3351011   | 3351106   |
| chr8 | 3417391   | 3417546   |
| chr8 | 3554291   | 3554426   |
| chr8 | 4582281   | 4582416   |
| chr8 | 6142791   | 6142886   |
| chr8 | 6566141   | 6566286   |
| chr8 | 6729541   | 6729746   |
| chr8 | 7472251   | 7472356   |
| chr8 | 8101941   | 8102106   |
| chr8 | 8185951   | 8186026   |
| chr8 | 8237151   | 8237336   |
| chr8 | 8258361   | 8258596   |
| chr8 | 8282141   | 8282256   |
| chr8 | 8325921   | 8326086   |
| chr8 | 8328411   | 8328566   |
| chr8 | 8335631   | 8335776   |
| chr8 | 8337781   | 8338026   |
| chr8 | 8347591   | 8347716   |
| chr8 | 8362151   | 8362306   |
| chr8 | 8438831   | 8438976   |
| chr8 | 8468451   | 8468576   |
| chr8 | 8476281   | 8476586   |
| chr8 | 8498681   | 8498836   |
| chr8 | 8575191   | 8575366   |
| chr8 | 8596321   | 8596456   |
| chr8 | 8597511   | 8597636   |
| chr8 | 8644581   | 8644656   |
| chr8 | 8654051   | 8654216   |
| chr8 | 8657201   | 8657306   |
| chr8 | 8704991   | 8705126   |
| chr8 | 8810621   | 8810736   |
| chr8 | 8851531   | 8851666   |
| chr8 | 8852991   | 8853156   |
| chr8 | 8867461   | 8867576   |
| chr8 | 8871271   | 8871376   |
| chr8 | 8871491   | 8871616   |
| chr8 | 8947971   | 8948186   |
| chr8 | 8994841   | 8994986   |
| chr8 | 9030101   | 9030306   |
| chr8 | 9030821   | 9031036   |
| chr8 | 9128191   | 9128296   |

|      |          |          |
|------|----------|----------|
| chr8 | 9157351  | 9157756  |
| chr8 | 9288071  | 9288206  |
| chr8 | 9288441  | 9288556  |
| chr8 | 9426431  | 9426546  |
| chr8 | 10499911 | 10500046 |
| chr8 | 10517591 | 10517696 |
| chr8 | 10805781 | 10805926 |
| chr8 | 10857351 | 10857616 |
| chr8 | 10859781 | 10859926 |
| chr8 | 10862551 | 10862646 |
| chr8 | 10866031 | 10866406 |
| chr8 | 10866871 | 10867096 |
| chr8 | 10921611 | 10921776 |
| chr8 | 10922051 | 10922186 |
| chr8 | 10946211 | 10946376 |
| chr8 | 10961321 | 10961386 |
| chr8 | 10965351 | 10965516 |
| chr8 | 10968761 | 10968936 |
| chr8 | 11193111 | 11193246 |
| chr8 | 11308741 | 11309036 |
| chr8 | 11375901 | 11376116 |
| chr8 | 11382471 | 11382616 |
| chr8 | 11382631 | 11382786 |
| chr8 | 11656621 | 11656756 |
| chr8 | 11710481 | 11710616 |
| chr8 | 11770781 | 11770976 |
| chr8 | 11771031 | 11771206 |
| chr8 | 11902561 | 11902686 |
| chr8 | 11912191 | 11912316 |
| chr8 | 11977241 | 11977756 |
| chr8 | 12051291 | 12051446 |
| chr8 | 12063151 | 12063276 |
| chr8 | 12171091 | 12171306 |
| chr8 | 12171381 | 12171486 |
| chr8 | 12175451 | 12175526 |
| chr8 | 12175591 | 12175756 |
| chr8 | 12234191 | 12234406 |
| chr8 | 12264151 | 12264306 |
| chr8 | 12268241 | 12268506 |
| chr8 | 12325011 | 12325326 |
| chr8 | 12407821 | 12407896 |
| chr8 | 12410221 | 12410346 |
| chr8 | 12427801 | 12427896 |
| chr8 | 12457311 | 12457406 |
| chr8 | 12482171 | 12482296 |
| chr8 | 12501231 | 12501336 |
| chr8 | 12513181 | 12513356 |
| chr8 | 12538661 | 12538816 |
| chr8 | 12548241 | 12548406 |
| chr8 | 12548521 | 12548616 |
| chr8 | 12548801 | 12548966 |
| chr8 | 12568771 | 12568906 |
| chr8 | 12576241 | 12576346 |



|      |          |          |
|------|----------|----------|
| chr8 | 12708531 | 12708636 |
| chr8 | 12708651 | 12708866 |
| chr8 | 12730891 | 12731016 |
| chr8 | 12821701 | 12821866 |
| chr8 | 12823961 | 12824086 |
| chr8 | 12883051 | 12883206 |
| chr8 | 12931661 | 12931816 |
| chr8 | 13292801 | 13292936 |
| chr8 | 13648721 | 13648956 |
| chr8 | 13649431 | 13649546 |
| chr8 | 13692281 | 13692456 |
| chr8 | 13913901 | 13914036 |
| chr8 | 14285611 | 14285736 |
| chr8 | 14768811 | 14768956 |
| chr8 | 14773131 | 14773296 |
| chr8 | 14950031 | 14950376 |
| chr8 | 15071411 | 15071636 |
| chr8 | 15326751 | 15326876 |
| chr8 | 15493931 | 15494066 |
| chr8 | 16272561 | 16272916 |
| chr8 | 16825191 | 16825276 |
| chr8 | 17656921 | 17657046 |
| chr8 | 17948491 | 17948576 |
| chr8 | 18648931 | 18649096 |
| chr8 | 18657361 | 18657696 |
| chr8 | 18666791 | 18666956 |
| chr8 | 18694211 | 18694446 |
| chr8 | 18793161 | 18793246 |
| chr8 | 18794931 | 18795086 |
| chr8 | 20431751 | 20431876 |
| chr8 | 23505111 | 23505206 |
| chr8 | 23509391 | 23509656 |
| chr8 | 23509811 | 23509976 |
| chr8 | 23911761 | 23911896 |
| chr8 | 23974351 | 23974656 |
| chr8 | 23974671 | 23974846 |
| chr8 | 24224011 | 24224216 |
| chr8 | 24503631 | 24503736 |
| chr8 | 24503761 | 24503886 |
| chr8 | 24503911 | 24504106 |
| chr8 | 24547531 | 24547686 |
| chr8 | 24664451 | 24664606 |
| chr8 | 24853241 | 24853516 |
| chr8 | 24935821 | 24935936 |
| chr8 | 24948071 | 24948176 |
| chr8 | 25148071 | 25148246 |
| chr8 | 25148291 | 25148476 |
| chr8 | 25588271 | 25588366 |
| chr8 | 25731591 | 25731696 |
| chr8 | 25743051 | 25743176 |
| chr8 | 25817601 | 25817696 |
| chr8 | 25817761 | 25817966 |
| chr8 | 25897521 | 25897686 |

|      |          |          |
|------|----------|----------|
| chr8 | 25904341 | 25904626 |
| chr8 | 25950281 | 25950426 |
| chr8 | 25968781 | 25968936 |
| chr8 | 25987631 | 25987746 |
| chr8 | 26041841 | 26041956 |
| chr8 | 26333411 | 26333546 |
| chr8 | 26532981 | 26533146 |
| chr8 | 26533421 | 26533506 |
| chr8 | 26535951 | 26536206 |
| chr8 | 26718341 | 26718456 |
| chr8 | 26740031 | 26740136 |
| chr8 | 26741461 | 26741626 |
| chr8 | 26895451 | 26895606 |
| chr8 | 26905681 | 26905776 |
| chr8 | 26905831 | 26906086 |
| chr8 | 26916501 | 26916576 |
| chr8 | 26927341 | 26927526 |
| chr8 | 27000591 | 27000756 |
| chr8 | 27000891 | 27001086 |
| chr8 | 27002821 | 27003006 |
| chr8 | 27003051 | 27003426 |
| chr8 | 27012651 | 27012756 |
| chr8 | 27013731 | 27013826 |
| chr8 | 27103641 | 27103856 |
| chr8 | 27240491 | 27240636 |
| chr8 | 27730561 | 27730936 |
| chr8 | 27731901 | 27732136 |
| chr8 | 27734521 | 27734696 |
| chr8 | 27734731 | 27734856 |
| chr8 | 27738961 | 27739146 |
| chr8 | 27770211 | 27770336 |
| chr8 | 27770671 | 27770776 |
| chr8 | 27886121 | 27886416 |
| chr8 | 27897681 | 27897746 |
| chr8 | 27904271 | 27904346 |
| chr8 | 27904451 | 27904646 |
| chr8 | 27937511 | 27937686 |
| chr8 | 27969731 | 27969896 |
| chr8 | 27973181 | 27973586 |
| chr8 | 27974111 | 27974246 |
| chr8 | 27991601 | 27991756 |
| chr8 | 27992121 | 27992456 |
| chr8 | 27996951 | 27997096 |
| chr8 | 28060641 | 28060756 |
| chr8 | 28088091 | 28088196 |
| chr8 | 28088211 | 28088506 |
| chr8 | 28091791 | 28092016 |
| chr8 | 28092071 | 28092146 |
| chr8 | 28093231 | 28093316 |
| chr8 | 28121361 | 28121496 |
| chr8 | 28138141 | 28138346 |
| chr8 | 28138591 | 28138746 |
| chr8 | 28142991 | 28143206 |

|      |          |          |
|------|----------|----------|
| chr8 | 28213331 | 28213476 |
| chr8 | 28213691 | 28213866 |
| chr8 | 28236321 | 28236496 |
| chr8 | 28236591 | 28236926 |
| chr8 | 28273481 | 28273676 |
| chr8 | 28274771 | 28275026 |
| chr8 | 28278001 | 28278446 |
| chr8 | 28300861 | 28301116 |
| chr8 | 28301131 | 28301346 |
| chr8 | 28303621 | 28303766 |
| chr8 | 28306581 | 28306706 |
| chr8 | 28309711 | 28309876 |
| chr8 | 28310191 | 28310296 |
| chr8 | 28310581 | 28310736 |
| chr8 | 28312571 | 28312906 |
| chr8 | 28312951 | 28313186 |
| chr8 | 28314381 | 28314636 |
| chr8 | 28314951 | 28315246 |
| chr8 | 28320521 | 28320696 |
| chr8 | 28320891 | 28321066 |
| chr8 | 28331011 | 28331126 |
| chr8 | 28361101 | 28361216 |
| chr8 | 28374071 | 28374346 |
| chr8 | 28425471 | 28425606 |
| chr8 | 28437691 | 28437866 |
| chr8 | 28439451 | 28439626 |
| chr8 | 28439931 | 28440146 |
| chr8 | 28440171 | 28440426 |
| chr8 | 28440531 | 28440796 |
| chr8 | 28450361 | 28450626 |
| chr8 | 28450701 | 28450936 |
| chr8 | 28460231 | 28460386 |
| chr8 | 28465281 | 28465496 |
| chr8 | 28474671 | 28474816 |
| chr8 | 28474851 | 28475166 |
| chr8 | 28523831 | 28523996 |
| chr8 | 28524041 | 28524276 |
| chr8 | 28526061 | 28526156 |
| chr8 | 28527781 | 28528086 |
| chr8 | 28534421 | 28534576 |
| chr8 | 28553431 | 28553646 |
| chr8 | 28555381 | 28555496 |
| chr8 | 28570191 | 28570466 |
| chr8 | 28573491 | 28573616 |
| chr8 | 28621501 | 28621636 |
| chr8 | 28632791 | 28632966 |
| chr8 | 28633481 | 28633606 |
| chr8 | 28853751 | 28853876 |
| chr8 | 29718981 | 29719126 |
| chr8 | 29970351 | 29970506 |
| chr8 | 30171461 | 30171626 |
| chr8 | 30171701 | 30171896 |
| chr8 | 30321261 | 30321356 |

|      |          |          |
|------|----------|----------|
| chr8 | 30545071 | 30545206 |
| chr8 | 32036791 | 32036896 |
| chr8 | 32732561 | 32732726 |
| chr8 | 32921141 | 32921256 |
| chr8 | 33287671 | 33287776 |
| chr8 | 33351671 | 33351816 |
| chr8 | 33496801 | 33496926 |
| chr8 | 33510971 | 33511076 |
| chr8 | 33524911 | 33525176 |
| chr8 | 33534611 | 33534776 |
| chr8 | 33534871 | 33535136 |
| chr8 | 33535171 | 33535356 |
| chr8 | 33543371 | 33543556 |
| chr8 | 34155571 | 34155716 |
| chr8 | 34274571 | 34274706 |
| chr8 | 34645511 | 34645826 |
| chr8 | 34767581 | 34767696 |
| chr8 | 35068291 | 35068386 |
| chr8 | 35265461 | 35265656 |
| chr8 | 35273741 | 35273886 |
| chr8 | 35315611 | 35315836 |
| chr8 | 35342561 | 35342706 |
| chr8 | 35350991 | 35351116 |
| chr8 | 35354611 | 35354706 |
| chr8 | 35365661 | 35365836 |
| chr8 | 35371671 | 35371816 |
| chr8 | 35372011 | 35372176 |
| chr8 | 35372201 | 35372336 |
| chr8 | 35374331 | 35374426 |
| chr8 | 35375331 | 35375526 |
| chr8 | 35386891 | 35387046 |
| chr8 | 35399301 | 35399496 |
| chr8 | 35399501 | 35399666 |
| chr8 | 35444431 | 35444546 |
| chr8 | 35447041 | 35447226 |
| chr8 | 35453151 | 35453416 |
| chr8 | 35458931 | 35459296 |
| chr8 | 35543341 | 35543476 |
| chr8 | 35543481 | 35543886 |
| chr8 | 35548481 | 35548656 |
| chr8 | 35548821 | 35549366 |
| chr8 | 35609241 | 35609476 |
| chr8 | 35657571 | 35657756 |
| chr8 | 35706051 | 35706206 |
| chr8 | 35769011 | 35769156 |
| chr8 | 35832291 | 35832546 |
| chr8 | 35845781 | 35845946 |
| chr8 | 35849191 | 35849486 |
| chr8 | 35861161 | 35861286 |
| chr8 | 35886641 | 35886866 |
| chr8 | 36018181 | 36018336 |
| chr8 | 36042321 | 36042406 |
| chr8 | 36200121 | 36200386 |

|      |          |          |
|------|----------|----------|
| chr8 | 36221571 | 36221666 |
| chr8 | 36283121 | 36283396 |
| chr8 | 36359151 | 36359446 |
| chr8 | 36412501 | 36412666 |
| chr8 | 36431131 | 36431266 |
| chr8 | 36462071 | 36462216 |
| chr8 | 36462271 | 36462436 |
| chr8 | 36464461 | 36464766 |
| chr8 | 36474851 | 36474996 |
| chr8 | 36478771 | 36478846 |
| chr8 | 36582611 | 36582826 |
| chr8 | 36586231 | 36586396 |
| chr8 | 36669981 | 36670216 |
| chr8 | 36690301 | 36690426 |
| chr8 | 36762211 | 36762466 |
| chr8 | 36791871 | 36791986 |
| chr8 | 36853831 | 36853996 |
| chr8 | 37060741 | 37060886 |
| chr8 | 37074811 | 37074966 |
| chr8 | 37075631 | 37075716 |
| chr8 | 37075871 | 37076246 |
| chr8 | 37411991 | 37412166 |
| chr8 | 37412181 | 37412366 |
| chr8 | 37417291 | 37417526 |
| chr8 | 37425241 | 37425336 |
| chr8 | 37587331 | 37587476 |
| chr8 | 37587521 | 37587676 |
| chr8 | 37589841 | 37589996 |
| chr8 | 37590091 | 37590196 |
| chr8 | 37610591 | 37610796 |
| chr8 | 37664221 | 37664336 |
| chr8 | 37664401 | 37664566 |
| chr8 | 37759661 | 37759926 |
| chr8 | 37929321 | 37929476 |
| chr8 | 37996601 | 37996766 |
| chr8 | 38043601 | 38043826 |
| chr8 | 38049761 | 38049876 |
| chr8 | 38066841 | 38066986 |
| chr8 | 38069341 | 38069436 |
| chr8 | 38071771 | 38071896 |
| chr8 | 38182611 | 38182706 |
| chr8 | 38192631 | 38192776 |
| chr8 | 38196051 | 38196146 |
| chr8 | 38198891 | 38199086 |
| chr8 | 40193851 | 40193996 |
| chr8 | 41137011 | 41137146 |
| chr8 | 41933581 | 41933736 |
| chr8 | 42071981 | 42072116 |
| chr8 | 42104181 | 42104346 |
| chr8 | 42139411 | 42139586 |
| chr8 | 42426411 | 42426576 |
| chr8 | 42462061 | 42462396 |
| chr8 | 42463251 | 42463406 |

|      |          |          |
|------|----------|----------|
| chr8 | 42573251 | 42573386 |
| chr8 | 42613231 | 42613366 |
| chr8 | 42654181 | 42654276 |
| chr8 | 43326621 | 43326736 |
| chr8 | 45557731 | 45557856 |
| chr8 | 45874341 | 45874446 |
| chr8 | 46075961 | 46076156 |
| chr8 | 46195061 | 46195216 |
| chr8 | 46233551 | 46233836 |
| chr8 | 46285741 | 46285896 |
| chr8 | 46311271 | 46311416 |
| chr8 | 46338691 | 46338786 |
| chr8 | 46455861 | 46455976 |
| chr8 | 46458191 | 46458346 |
| chr8 | 46459371 | 46459496 |
| chr8 | 46463981 | 46464146 |
| chr8 | 46473981 | 46474316 |
| chr8 | 46482451 | 46482596 |
| chr8 | 46490931 | 46491386 |
| chr8 | 46497591 | 46497836 |
| chr8 | 46503261 | 46503406 |
| chr8 | 46512931 | 46513076 |
| chr8 | 46819501 | 46819646 |
| chr8 | 46823161 | 46823286 |
| chr8 | 47113751 | 47113916 |
| chr8 | 47129911 | 47130056 |
| chr8 | 47140021 | 47140146 |
| chr8 | 47160811 | 47160936 |
| chr8 | 47643871 | 47643966 |
| chr8 | 47945141 | 47945286 |
| chr8 | 47957371 | 47957496 |
| chr8 | 47983431 | 47983556 |
| chr8 | 47987181 | 47987296 |
| chr8 | 48099871 | 48100036 |
| chr8 | 48215131 | 48215226 |
| chr8 | 48241061 | 48241266 |
| chr8 | 48248301 | 48248446 |
| chr8 | 48347891 | 48348046 |
| chr8 | 48684301 | 48684636 |
| chr8 | 48705561 | 48705706 |
| chr8 | 48716821 | 48717086 |
| chr8 | 48739181 | 48739466 |
| chr8 | 48789931 | 48790076 |
| chr8 | 48837541 | 48837696 |
| chr8 | 48838951 | 48839136 |
| chr8 | 48854971 | 48855156 |
| chr8 | 48886051 | 48886276 |
| chr8 | 48891971 | 48892056 |
| chr8 | 49057361 | 49057576 |
| chr8 | 49111981 | 49112126 |
| chr8 | 49133741 | 49133916 |
| chr8 | 49149321 | 49149496 |
| chr8 | 49151341 | 49151536 |

|      |          |          |
|------|----------|----------|
| chr8 | 49151581 | 49151736 |
| chr8 | 49244921 | 49245066 |
| chr8 | 49263081 | 49263236 |
| chr8 | 49263271 | 49263586 |
| chr8 | 49305311 | 49305646 |
| chr8 | 49373681 | 49373876 |
| chr8 | 49373961 | 49374226 |
| chr8 | 49430831 | 49431176 |
| chr8 | 49431241 | 49431366 |
| chr8 | 49431501 | 49431686 |
| chr8 | 49432641 | 49432896 |
| chr8 | 49432921 | 49433106 |
| chr8 | 49435261 | 49435366 |
| chr8 | 49608061 | 49608226 |
| chr8 | 49623201 | 49623386 |
| chr8 | 49625931 | 49626016 |
| chr8 | 49629201 | 49629446 |
| chr8 | 49629461 | 49629576 |
| chr8 | 49719711 | 49719916 |
| chr8 | 49788531 | 49788646 |
| chr8 | 49797601 | 49797736 |
| chr8 | 49797781 | 49797876 |
| chr8 | 49798311 | 49798546 |
| chr8 | 49798961 | 49799186 |
| chr8 | 49803351 | 49803456 |
| chr8 | 49808041 | 49808156 |
| chr8 | 49899621 | 49899766 |
| chr8 | 49936481 | 49936616 |
| chr8 | 49948831 | 49948966 |
| chr8 | 49966991 | 49967116 |
| chr8 | 49973811 | 49973946 |
| chr8 | 50008161 | 50008376 |
| chr8 | 50039921 | 50040016 |
| chr8 | 50049361 | 50049446 |
| chr8 | 50062081 | 50062266 |
| chr8 | 50062601 | 50062726 |
| chr8 | 50110031 | 50110266 |
| chr8 | 50111821 | 50111976 |
| chr8 | 50113011 | 50113106 |
| chr8 | 50116881 | 50116946 |
| chr8 | 50154471 | 50154616 |
| chr8 | 50247531 | 50247686 |
| chr8 | 50284391 | 50284716 |
| chr8 | 50303501 | 50303646 |
| chr8 | 50308631 | 50308746 |
| chr8 | 50349121 | 50349266 |
| chr8 | 50349271 | 50349416 |
| chr8 | 50387231 | 50387346 |
| chr8 | 50390151 | 50390576 |
| chr8 | 50430181 | 50430386 |
| chr8 | 50480711 | 50480866 |
| chr8 | 50505761 | 50505936 |
| chr8 | 50741861 | 50741996 |

|      |          |          |
|------|----------|----------|
| chr8 | 50781331 | 50781496 |
| chr8 | 50844901 | 50845006 |
| chr8 | 50939011 | 50939116 |
| chr8 | 50960851 | 50961196 |
| chr8 | 51126931 | 51127036 |
| chr8 | 51163021 | 51163136 |
| chr8 | 51400401 | 51400736 |
| chr8 | 51401021 | 51401126 |
| chr8 | 51431031 | 51431156 |
| chr8 | 51791571 | 51791726 |
| chr8 | 55455181 | 55455286 |
| chr8 | 55985311 | 55985586 |
| chr8 | 56453581 | 56453686 |
| chr8 | 59185801 | 59185936 |
| chr8 | 59498551 | 59498726 |
| chr8 | 59511611 | 59511726 |
| chr8 | 59514701 | 59514926 |
| chr8 | 59598671 | 59598766 |
| chr8 | 59768381 | 59768546 |
| chr8 | 59816341 | 59816446 |
| chr8 | 59824811 | 59824946 |
| chr8 | 59871661 | 59871836 |
| chr8 | 59876071 | 59876206 |
| chr8 | 60293451 | 60293616 |
| chr8 | 60293681 | 60293866 |
| chr8 | 60297001 | 60297176 |
| chr8 | 60297371 | 60297536 |
| chr8 | 60391111 | 60391256 |
| chr8 | 60439771 | 60440046 |
| chr8 | 60464421 | 60464566 |
| chr8 | 60468421 | 60468576 |
| chr8 | 60479951 | 60480186 |
| chr8 | 60486521 | 60486616 |
| chr8 | 60503871 | 60504066 |
| chr8 | 60519991 | 60520086 |
| chr8 | 60539531 | 60539646 |
| chr8 | 60658221 | 60658546 |
| chr8 | 60665081 | 60665206 |
| chr8 | 60665261 | 60665456 |
| chr8 | 60708431 | 60708576 |
| chr8 | 60708581 | 60708746 |
| chr8 | 60811571 | 60811726 |
| chr8 | 60815841 | 60816026 |
| chr8 | 60865481 | 60865626 |
| chr8 | 61110211 | 61110376 |
| chr8 | 61972181 | 61972286 |
| chr8 | 63622671 | 63622786 |
| chr8 | 63628401 | 63628476 |
| chr8 | 63648341 | 63648496 |
| chr8 | 63666461 | 63666566 |
| chr8 | 63754821 | 63754946 |
| chr8 | 63804861 | 63804996 |
| chr8 | 64118091 | 64118216 |



|      |          |          |
|------|----------|----------|
| chr8 | 64128811 | 64128916 |
| chr8 | 64139371 | 64139556 |
| chr8 | 64139561 | 64139706 |
| chr8 | 64154121 | 64154196 |
| chr8 | 64162271 | 64162436 |
| chr8 | 64166811 | 64166986 |
| chr8 | 64167341 | 64167516 |
| chr8 | 64175051 | 64175356 |
| chr8 | 64175981 | 64176196 |
| chr8 | 64200851 | 64200986 |
| chr8 | 64201941 | 64202066 |
| chr8 | 64214751 | 64214916 |
| chr8 | 64214931 | 64215056 |
| chr8 | 64216711 | 64216866 |
| chr8 | 64235671 | 64235836 |
| chr8 | 64270641 | 64270706 |
| chr8 | 64278861 | 64279136 |
| chr8 | 64280001 | 64280126 |
| chr8 | 64280571 | 64280696 |
| chr8 | 64282811 | 64282956 |
| chr8 | 64338871 | 64339026 |
| chr8 | 64367471 | 64367576 |
| chr8 | 64448251 | 64448476 |
| chr8 | 64515771 | 64515876 |
| chr8 | 64559211 | 64559406 |
| chr8 | 64566981 | 64567086 |
| chr8 | 64637521 | 64637686 |
| chr8 | 64649131 | 64649296 |
| chr8 | 64983251 | 64983366 |
| chr8 | 66716611 | 66716706 |
| chr8 | 66862181 | 66862306 |
| chr8 | 67259181 | 67259446 |
| chr8 | 67272021 | 67272126 |
| chr8 | 67669721 | 67669826 |
| chr8 | 67763091 | 67763766 |
| chr8 | 67962401 | 67962516 |
| chr8 | 67962891 | 67963026 |
| chr8 | 67996961 | 67997136 |
| chr8 | 67997221 | 67997316 |
| chr8 | 68018911 | 68019086 |
| chr8 | 68026971 | 68027186 |
| chr8 | 68111451 | 68111706 |
| chr8 | 68886211 | 68886306 |
| chr8 | 70747231 | 70747436 |
| chr8 | 70751151 | 70751296 |
| chr8 | 70825331 | 70825496 |
| chr8 | 70879001 | 70879156 |
| chr8 | 70883371 | 70883586 |
| chr8 | 70901531 | 70901636 |
| chr8 | 70942701 | 70942846 |
| chr8 | 70987681 | 70987776 |
| chr8 | 71045101 | 71045226 |
| chr8 | 71097771 | 71097876 |

|      |          |          |
|------|----------|----------|
| chr8 | 71098451 | 71098586 |
| chr8 | 71301551 | 71301706 |
| chr8 | 71652081 | 71652256 |
| chr8 | 71811921 | 71812086 |
| chr8 | 72078411 | 72078576 |
| chr8 | 72112631 | 72112806 |
| chr8 | 72849351 | 72849466 |
| chr8 | 73089301 | 73089436 |
| chr8 | 73585431 | 73585586 |
| chr8 | 73585681 | 73585896 |
| chr8 | 73652521 | 73652636 |
| chr8 | 73740431 | 73740566 |
| chr8 | 73741341 | 73741466 |
| chr8 | 73741491 | 73741686 |
| chr8 | 73758551 | 73758776 |
| chr8 | 74445921 | 74446026 |
| chr8 | 74629191 | 74629566 |
| chr8 | 74629601 | 74629746 |
| chr8 | 76109591 | 76109726 |
| chr8 | 77727371 | 77727476 |
| chr8 | 77727511 | 77727626 |
| chr8 | 77767891 | 77767986 |
| chr8 | 78097151 | 78097246 |
| chr8 | 79035191 | 79035336 |
| chr8 | 79044811 | 79044946 |
| chr8 | 80237591 | 80237766 |
| chr8 | 80302881 | 80303006 |
| chr8 | 80313001 | 80313116 |
| chr8 | 80329051 | 80329166 |
| chr8 | 80369951 | 80370116 |
| chr8 | 80403751 | 80404126 |
| chr8 | 80407921 | 80408136 |
| chr8 | 80417481 | 80417686 |
| chr8 | 80531161 | 80531266 |
| chr8 | 80578331 | 80578416 |
| chr8 | 80668991 | 80669096 |
| chr8 | 80670831 | 80670976 |
| chr8 | 80766461 | 80766676 |
| chr8 | 81097521 | 81097656 |
| chr8 | 81199871 | 81199966 |
| chr8 | 81440861 | 81440946 |
| chr8 | 81467741 | 81467906 |
| chr8 | 81469731 | 81469886 |
| chr8 | 81474671 | 81474756 |
| chr8 | 81491401 | 81491756 |
| chr8 | 81521251 | 81521546 |
| chr8 | 81529201 | 81529356 |
| chr8 | 81558691 | 81558756 |
| chr8 | 81616971 | 81617076 |
| chr8 | 81922261 | 81922386 |
| chr8 | 81929231 | 81929366 |
| chr8 | 82223411 | 82223546 |
| chr8 | 82248501 | 82248686 |

|      |          |          |
|------|----------|----------|
| chr8 | 82272831 | 82272956 |
| chr8 | 82293201 | 82293326 |
| chr8 | 82301371 | 82301496 |
| chr8 | 82498181 | 82498326 |
| chr8 | 82512161 | 82512276 |
| chr8 | 82515981 | 82516066 |
| chr8 | 82517011 | 82517206 |
| chr8 | 82518491 | 82518656 |
| chr8 | 82825481 | 82825636 |
| chr8 | 82925751 | 82925916 |
| chr8 | 82927551 | 82927666 |
| chr8 | 82927791 | 82927956 |
| chr8 | 82936701 | 82936796 |
| chr8 | 82951801 | 82951986 |
| chr8 | 83100951 | 83101066 |
| chr8 | 83159551 | 83159666 |
| chr8 | 83211091 | 83211566 |
| chr8 | 83394631 | 83394736 |
| chr8 | 83506331 | 83506446 |
| chr8 | 83553491 | 83553626 |
| chr8 | 83689751 | 83689896 |
| chr8 | 83709851 | 83710206 |
| chr8 | 83714241 | 83714336 |
| chr8 | 83714671 | 83714826 |
| chr8 | 83734071 | 83734206 |
| chr8 | 83853301 | 83853456 |
| chr8 | 85373661 | 85373916 |
| chr8 | 85716681 | 85716756 |
| chr8 | 86911351 | 86911466 |
| chr8 | 87089091 | 87089196 |
| chr8 | 87100421 | 87100526 |
| chr8 | 87174771 | 87175206 |
| chr8 | 87541021 | 87541196 |
| chr8 | 87611861 | 87611956 |
| chr8 | 87621131 | 87621266 |
| chr8 | 87634211 | 87634456 |
| chr8 | 87656011 | 87656136 |
| chr8 | 87874641 | 87874806 |
| chr8 | 89093471 | 89093596 |
| chr8 | 89218861 | 89218976 |
| chr8 | 89983911 | 89984106 |
| chr8 | 89997181 | 89997366 |
| chr8 | 90011771 | 90011896 |
| chr8 | 90042261 | 90042406 |
| chr8 | 90122011 | 90122136 |
| chr8 | 90163801 | 90163996 |
| chr8 | 90352081 | 90352186 |
| chr8 | 90489021 | 90489176 |
| chr8 | 90593431 | 90593726 |
| chr8 | 90692341 | 90692486 |
| chr8 | 90722671 | 90722806 |
| chr8 | 90727021 | 90727286 |
| chr8 | 90727531 | 90727726 |

|      |          |          |
|------|----------|----------|
| chr8 | 90763231 | 90763516 |
| chr8 | 90802111 | 90802246 |
| chr8 | 90812681 | 90812806 |
| chr8 | 90823211 | 90823436 |
| chr8 | 90843921 | 90844056 |
| chr8 | 90845251 | 90845396 |
| chr8 | 90865061 | 90865206 |
| chr8 | 90955451 | 90955656 |
| chr8 | 91215581 | 91215706 |
| chr8 | 91414621 | 91414836 |
| chr8 | 91726141 | 91726296 |
| chr8 | 91821381 | 91821516 |
| chr8 | 91829701 | 91829806 |
| chr8 | 91844291 | 91844466 |
| chr8 | 91851731 | 91851836 |
| chr8 | 91881911 | 91882156 |
| chr8 | 91938441 | 91938586 |
| chr8 | 91947461 | 91947616 |
| chr8 | 91954341 | 91954446 |
| chr8 | 92075411 | 92075556 |
| chr8 | 92075671 | 92075766 |
| chr8 | 92135181 | 92135666 |
| chr8 | 92179121 | 92179336 |
| chr8 | 92197661 | 92197806 |
| chr8 | 92215171 | 92215306 |
| chr8 | 92239231 | 92239346 |
| chr8 | 92261311 | 92261486 |
| chr8 | 92261561 | 92261846 |
| chr8 | 92261951 | 92262116 |
| chr8 | 92277601 | 92277896 |
| chr8 | 92277901 | 92278016 |
| chr8 | 92299401 | 92299516 |
| chr8 | 92353091 | 92353206 |
| chr8 | 92424911 | 92425066 |
| chr8 | 92460891 | 92461006 |
| chr8 | 92549251 | 92549396 |
| chr8 | 92582291 | 92582426 |
| chr8 | 92715611 | 92715826 |
| chr8 | 92936971 | 92937116 |
| chr8 | 92954401 | 92954556 |
| chr8 | 92954781 | 92955026 |
| chr8 | 92955091 | 92955176 |
| chr8 | 93067041 | 93067166 |
| chr8 | 93120451 | 93120526 |
| chr8 | 93135131 | 93135266 |
| chr8 | 93157941 | 93158056 |
| chr8 | 93167211 | 93167316 |
| chr8 | 93214071 | 93214216 |
| chr8 | 93244181 | 93244446 |
| chr8 | 93331171 | 93331366 |
| chr8 | 93397761 | 93397926 |
| chr8 | 93417931 | 93418086 |
| chr8 | 93433091 | 93433216 |

|      |          |          |
|------|----------|----------|
| chr8 | 93559511 | 93559776 |
| chr8 | 93712601 | 93713046 |
| chr8 | 93751681 | 93751786 |
| chr8 | 93752181 | 93752316 |
| chr8 | 93845121 | 93845276 |
| chr8 | 93845441 | 93845706 |
| chr8 | 93926491 | 93926626 |
| chr8 | 94061771 | 94061996 |
| chr8 | 94135821 | 94135946 |
| chr8 | 94221641 | 94221846 |
| chr8 | 94222201 | 94222436 |
| chr8 | 94261101 | 94261256 |
| chr8 | 94262251 | 94262346 |
| chr8 | 94265211 | 94265426 |
| chr8 | 94265661 | 94265976 |
| chr8 | 94266831 | 94267196 |
| chr8 | 94271321 | 94271516 |
| chr8 | 94271701 | 94271896 |
| chr8 | 94273911 | 94274066 |
| chr8 | 94285921 | 94286096 |
| chr8 | 94314741 | 94314916 |
| chr8 | 94379491 | 94379626 |
| chr8 | 94379831 | 94380036 |
| chr8 | 94380291 | 94380466 |
| chr8 | 94387221 | 94387336 |
| chr8 | 94404931 | 94405216 |
| chr8 | 94405351 | 94405486 |
| chr8 | 94406561 | 94406886 |
| chr8 | 94408371 | 94408536 |
| chr8 | 94408611 | 94408816 |
| chr8 | 94409031 | 94409176 |
| chr8 | 94412441 | 94412546 |
| chr8 | 94413521 | 94413656 |
| chr8 | 94415311 | 94415616 |
| chr8 | 94415841 | 94415976 |
| chr8 | 94423371 | 94423536 |
| chr8 | 94428371 | 94428486 |
| chr8 | 94467071 | 94467346 |
| chr8 | 94484021 | 94484286 |
| chr8 | 94503931 | 94504246 |
| chr8 | 94512851 | 94513296 |
| chr8 | 94515741 | 94516256 |
| chr8 | 94543551 | 94543796 |
| chr8 | 94576871 | 94577186 |
| chr8 | 94582071 | 94582496 |
| chr8 | 94582611 | 94582776 |
| chr8 | 94600031 | 94600256 |
| chr8 | 94635841 | 94635996 |
| chr8 | 94683921 | 94684166 |
| chr8 | 94707681 | 94707846 |
| chr8 | 94708141 | 94708376 |
| chr8 | 94710971 | 94711106 |
| chr8 | 94717001 | 94717216 |

|      |          |          |
|------|----------|----------|
| chr8 | 94742741 | 94742926 |
| chr8 | 94743271 | 94743456 |
| chr8 | 94745051 | 94745146 |
| chr8 | 94756261 | 94756416 |
| chr8 | 94761871 | 94762066 |
| chr8 | 94765241 | 94765576 |
| chr8 | 94771071 | 94771436 |
| chr8 | 94798831 | 94799046 |
| chr8 | 94833991 | 94834116 |
| chr8 | 94880981 | 94881096 |
| chr8 | 94885681 | 94885826 |
| chr8 | 94886261 | 94886376 |
| chr8 | 94886391 | 94886526 |
| chr8 | 94886651 | 94886856 |
| chr8 | 94898161 | 94898476 |
| chr8 | 94913681 | 94913786 |
| chr8 | 94917421 | 94917726 |
| chr8 | 94918611 | 94919006 |
| chr8 | 94919211 | 94919366 |
| chr8 | 95003121 | 95003286 |
| chr8 | 95003661 | 95003996 |
| chr8 | 95019261 | 95019356 |
| chr8 | 95020681 | 95020796 |
| chr8 | 95021741 | 95021906 |
| chr8 | 95025491 | 95025846 |
| chr8 | 95026091 | 95026216 |
| chr8 | 95026281 | 95026716 |
| chr8 | 95056811 | 95057086 |
| chr8 | 95057161 | 95057306 |
| chr8 | 95103761 | 95103926 |
| chr8 | 95176141 | 95176256 |
| chr8 | 95201231 | 95201436 |
| chr8 | 95201471 | 95201716 |
| chr8 | 95243611 | 95243746 |
| chr8 | 95255691 | 95256166 |
| chr8 | 95274151 | 95274306 |
| chr8 | 95358621 | 95358796 |
| chr8 | 95458891 | 95459026 |
| chr8 | 95594601 | 95594796 |
| chr8 | 95595521 | 95595666 |
| chr8 | 95611861 | 95612046 |
| chr8 | 95612241 | 95612406 |
| chr8 | 95632161 | 95632456 |
| chr8 | 95651451 | 95651596 |
| chr8 | 95738491 | 95738626 |
| chr8 | 96462071 | 96462166 |
| chr8 | 96516001 | 96516226 |
| chr8 | 96516961 | 96517056 |
| chr8 | 96955721 | 96955876 |
| chr8 | 97110441 | 97110596 |
| chr8 | 97196821 | 97196966 |
| chr8 | 97424401 | 97424536 |
| chr8 | 97440741 | 97441026 |

|      |           |           |
|------|-----------|-----------|
| chr8 | 97667061  | 97667316  |
| chr8 | 97678771  | 97678956  |
| chr8 | 97853931  | 97854296  |
| chr8 | 97931561  | 97931686  |
| chr8 | 98026731  | 98026946  |
| chr8 | 98091911  | 98092056  |
| chr8 | 98095211  | 98095346  |
| chr8 | 98099291  | 98099466  |
| chr8 | 98109951  | 98110056  |
| chr8 | 98132331  | 98132566  |
| chr8 | 98236041  | 98236206  |
| chr8 | 98435801  | 98435906  |
| chr8 | 98931591  | 98931746  |
| chr8 | 99000881  | 99000996  |
| chr8 | 99021451  | 99021576  |
| chr8 | 99252101  | 99252196  |
| chr8 | 99378241  | 99378456  |
| chr8 | 99590811  | 99590946  |
| chr8 | 99730671  | 99730816  |
| chr8 | 99753791  | 99753966  |
| chr8 | 99980141  | 99980296  |
| chr8 | 100306471 | 100306606 |
| chr8 | 101588841 | 101588946 |
| chr8 | 105419551 | 105419646 |
| chr8 | 105587731 | 105587946 |
| chr8 | 105615751 | 105616036 |
| chr8 | 105631171 | 105631256 |
| chr8 | 106135291 | 106135426 |
| chr8 | 106218951 | 106219076 |
| chr8 | 106524171 | 106524266 |
| chr8 | 106633571 | 106633726 |
| chr8 | 106639311 | 106639506 |
| chr8 | 106672981 | 106673136 |
| chr8 | 107080671 | 107080796 |
| chr8 | 107080871 | 107081166 |
| chr8 | 108244291 | 108244446 |
| chr8 | 108248261 | 108248416 |
| chr8 | 108284921 | 108285036 |
| chr8 | 108412341 | 108412506 |
| chr8 | 108814711 | 108814836 |
| chr8 | 109293621 | 109293836 |
| chr8 | 109293841 | 109294016 |
| chr8 | 109302291 | 109302486 |
| chr8 | 109449141 | 109449236 |
| chr8 | 109504021 | 109504146 |
| chr8 | 109515401 | 109515536 |
| chr8 | 109524551 | 109524706 |
| chr8 | 109524891 | 109525046 |
| chr8 | 109526271 | 109526436 |
| chr8 | 109616441 | 109616966 |
| chr8 | 109622211 | 109622346 |
| chr8 | 109687551 | 109687656 |
| chr8 | 109698761 | 109698876 |

|      |           |           |
|------|-----------|-----------|
| chr8 | 109705701 | 109705846 |
| chr8 | 109783711 | 109783886 |
| chr8 | 109821711 | 109821826 |
| chr8 | 110012191 | 110012396 |
| chr8 | 110076291 | 110076396 |
| chr8 | 110087221 | 110087356 |
| chr8 | 110087431 | 110087596 |
| chr8 | 110115441 | 110115606 |
| chr8 | 110273071 | 110273166 |
| chr8 | 110293401 | 110293506 |
| chr8 | 110338281 | 110338486 |
| chr8 | 110346741 | 110346876 |
| chr8 | 110379261 | 110379416 |
| chr8 | 110384551 | 110384726 |
| chr8 | 110391591 | 110391716 |
| chr8 | 110392511 | 110392816 |
| chr8 | 110497321 | 110497646 |
| chr8 | 110498021 | 110498276 |
| chr8 | 110551531 | 110551686 |
| chr8 | 110560791 | 110560906 |
| chr8 | 110588651 | 110588786 |
| chr8 | 110706561 | 110706646 |
| chr8 | 110709671 | 110709816 |
| chr8 | 110741561 | 110741876 |
| chr8 | 110749811 | 110749976 |
| chr8 | 110761011 | 110761346 |
| chr8 | 110761381 | 110761526 |
| chr8 | 110832471 | 110832596 |
| chr8 | 110837891 | 110838006 |
| chr8 | 110838021 | 110838166 |
| chr8 | 110970081 | 110970246 |
| chr8 | 110993701 | 110993866 |
| chr8 | 111083651 | 111083826 |
| chr8 | 111083891 | 111084046 |
| chr8 | 111084111 | 111084266 |
| chr8 | 111126871 | 111127056 |
| chr8 | 111130241 | 111130766 |
| chr8 | 111133931 | 111134046 |
| chr8 | 111134171 | 111134276 |
| chr8 | 111153801 | 111153956 |
| chr8 | 111252771 | 111253106 |
| chr8 | 111262501 | 111262616 |
| chr8 | 111276941 | 111277026 |
| chr8 | 111308791 | 111308916 |
| chr8 | 111343811 | 111343926 |
| chr8 | 111358351 | 111358546 |
| chr8 | 111370321 | 111370416 |
| chr8 | 111370651 | 111370936 |
| chr8 | 111452991 | 111453086 |
| chr8 | 111467511 | 111467816 |
| chr8 | 111479651 | 111479816 |
| chr8 | 111482261 | 111482376 |
| chr8 | 111482641 | 111482756 |



|      |           |           |
|------|-----------|-----------|
| chr8 | 111483651 | 111483776 |
| chr8 | 111607601 | 111607746 |
| chr8 | 111613861 | 111614176 |
| chr8 | 111622471 | 111622806 |
| chr8 | 111625901 | 111625986 |
| chr8 | 111637361 | 111637466 |
| chr8 | 111648181 | 111648396 |
| chr8 | 111651271 | 111651396 |
| chr8 | 111651701 | 111652036 |
| chr8 | 111653371 | 111653566 |
| chr8 | 111678591 | 111678746 |
| chr8 | 111726681 | 111726776 |
| chr8 | 111727091 | 111727196 |
| chr8 | 111732791 | 111732946 |
| chr8 | 111735371 | 111735526 |
| chr8 | 111735701 | 111735816 |
| chr8 | 111736011 | 111736186 |
| chr8 | 111831731 | 111831856 |
| chr8 | 111904461 | 111904576 |
| chr8 | 111994851 | 111995046 |
| chr8 | 112200211 | 112200396 |
| chr8 | 112202601 | 112202846 |
| chr8 | 112242131 | 112242246 |
| chr8 | 112248111 | 112248236 |
| chr8 | 112249781 | 112249856 |
| chr8 | 112250071 | 112250436 |
| chr8 | 112353161 | 112353346 |
| chr8 | 113129751 | 113129906 |
| chr8 | 113677211 | 113677286 |
| chr8 | 113677381 | 113677576 |
| chr8 | 113776851 | 113777016 |
| chr8 | 113804851 | 113805126 |
| chr8 | 113805231 | 113805646 |
| chr8 | 113818381 | 113818486 |
| chr8 | 113828331 | 113828606 |
| chr8 | 113842151 | 113842296 |
| chr8 | 114133221 | 114133356 |
| chr8 | 114322431 | 114322576 |
| chr8 | 114620831 | 114620956 |
| chr8 | 114668011 | 114668106 |
| chr8 | 114672111 | 114672236 |
| chr8 | 114718161 | 114718356 |
| chr8 | 114720651 | 114720816 |
| chr8 | 114751951 | 114752126 |
| chr8 | 114760491 | 114760606 |
| chr8 | 114762551 | 114762696 |
| chr8 | 114826621 | 114826776 |
| chr8 | 114838711 | 114838926 |
| chr8 | 114848291 | 114848436 |
| chr8 | 114849911 | 114850126 |
| chr8 | 114864991 | 114865186 |
| chr8 | 115058181 | 115058706 |
| chr8 | 115080981 | 115081146 |

|      |           |           |
|------|-----------|-----------|
| chr8 | 115143371 | 115143686 |
| chr8 | 115219061 | 115219226 |
| chr8 | 115219241 | 115219446 |
| chr8 | 115224471 | 115224586 |
| chr8 | 115475041 | 115475146 |
| chr8 | 115611061 | 115611236 |
| chr8 | 115792631 | 115792746 |
| chr8 | 115792901 | 115793106 |
| chr8 | 116140131 | 116140196 |
| chr8 | 116351301 | 116351426 |
| chr8 | 116437921 | 116438106 |
| chr8 | 116467211 | 116467346 |
| chr8 | 116467391 | 116467526 |
| chr8 | 116467721 | 116467926 |
| chr8 | 116648281 | 116648446 |
| chr8 | 116649371 | 116649436 |
| chr8 | 116707261 | 116707456 |
| chr8 | 116803141 | 116803306 |
| chr8 | 116803361 | 116803496 |
| chr8 | 116828731 | 116828966 |
| chr8 | 116871611 | 116871776 |
| chr8 | 116884911 | 116885066 |
| chr8 | 117097041 | 117097196 |
| chr8 | 117195531 | 117195656 |
| chr8 | 117222001 | 117222116 |
| chr8 | 117410601 | 117410756 |
| chr8 | 117414051 | 117414126 |
| chr8 | 117445051 | 117445226 |
| chr8 | 117445501 | 117445646 |
| chr8 | 117479431 | 117479616 |
| chr8 | 117483761 | 117483936 |
| chr8 | 117485511 | 117485856 |
| chr8 | 117489651 | 117489796 |
| chr8 | 117490431 | 117490596 |
| chr8 | 117497131 | 117497236 |
| chr8 | 117567161 | 117567446 |
| chr8 | 117593601 | 117593746 |
| chr8 | 117617701 | 117618056 |
| chr8 | 117637821 | 117638046 |
| chr8 | 117640061 | 117640286 |
| chr8 | 117650951 | 117651156 |
| chr8 | 117656791 | 117657196 |
| chr8 | 117658821 | 117658936 |
| chr8 | 117684291 | 117684486 |
| chr8 | 117693731 | 117693956 |
| chr8 | 117699661 | 117699766 |
| chr8 | 117731731 | 117731896 |
| chr8 | 117738581 | 117738796 |
| chr8 | 117762321 | 117762506 |
| chr8 | 117785091 | 117785226 |
| chr8 | 117785231 | 117785566 |
| chr8 | 117793331 | 117793496 |
| chr8 | 117877441 | 117877666 |

|      |           |           |
|------|-----------|-----------|
| chr8 | 118036471 | 118036766 |
| chr8 | 118045301 | 118045426 |
| chr8 | 118046231 | 118046366 |
| chr8 | 118248601 | 118248816 |
| chr8 | 118820391 | 118820516 |
| chr8 | 118997111 | 118997286 |
| chr8 | 119129531 | 119129666 |
| chr8 | 119270091 | 119270266 |
| chr8 | 119298881 | 119299036 |
| chr8 | 119962311 | 119962476 |
| chr8 | 120084421 | 120084566 |
| chr8 | 120145461 | 120145756 |
| chr8 | 120145871 | 120145966 |
| chr8 | 120146061 | 120146196 |
| chr8 | 120146411 | 120146786 |
| chr8 | 120381101 | 120381266 |
| chr8 | 120635791 | 120635906 |
| chr8 | 120699551 | 120699726 |
| chr8 | 120837481 | 120837636 |
| chr8 | 120928391 | 120928526 |
| chr8 | 120928761 | 120928906 |
| chr8 | 120961971 | 120962116 |
| chr8 | 120973411 | 120973546 |
| chr8 | 121799341 | 121799426 |
| chr8 | 121824051 | 121824186 |
| chr8 | 122435051 | 122435166 |
| chr8 | 122452301 | 122452386 |
| chr8 | 122504751 | 122504956 |
| chr8 | 122513751 | 122513966 |
| chr8 | 122516691 | 122516856 |
| chr8 | 122517171 | 122517316 |
| chr8 | 122531041 | 122531236 |
| chr8 | 122556421 | 122556546 |
| chr8 | 122582151 | 122582326 |
| chr8 | 122584941 | 122585206 |
| chr8 | 122677841 | 122678026 |
| chr8 | 122678391 | 122678616 |
| chr8 | 122725821 | 122725966 |
| chr8 | 122858091 | 122858296 |
| chr8 | 122890021 | 122890146 |
| chr8 | 122890381 | 122890666 |
| chr8 | 122892711 | 122892946 |
| chr8 | 123111861 | 123111956 |
| chr8 | 123116881 | 123117116 |
| chr8 | 123181651 | 123181776 |
| chr8 | 123184741 | 123185126 |
| chr8 | 123204431 | 123204596 |
| chr8 | 123209171 | 123209296 |
| chr8 | 123238151 | 123238316 |
| chr8 | 123239811 | 123239936 |
| chr8 | 123251931 | 123252096 |
| chr8 | 123255261 | 123255386 |
| chr8 | 123257711 | 123257886 |

|      |           |           |
|------|-----------|-----------|
| chr8 | 123260371 | 123260886 |
| chr8 | 123262171 | 123262316 |
| chr8 | 123262491 | 123262606 |
| chr8 | 123262851 | 123263026 |
| chr8 | 123263241 | 123263706 |
| chr8 | 123267471 | 123267556 |
| chr8 | 123277831 | 123278286 |
| chr8 | 123290731 | 123290926 |
| chr8 | 123295351 | 123295496 |
| chr8 | 123295611 | 123295846 |
| chr8 | 123299211 | 123299666 |
| chr8 | 123302461 | 123302596 |
| chr8 | 123302641 | 123302746 |
| chr8 | 123311331 | 123311426 |
| chr8 | 123311821 | 123311916 |
| chr8 | 123325461 | 123325606 |
| chr8 | 123325631 | 123325756 |
| chr8 | 123331181 | 123331366 |
| chr8 | 123331381 | 123331766 |
| chr8 | 123333971 | 123334336 |
| chr8 | 123334361 | 123334466 |
| chr8 | 123335831 | 123336026 |
| chr8 | 123336031 | 123336236 |
| chr8 | 123336251 | 123336496 |
| chr8 | 123341361 | 123341536 |
| chr8 | 123367301 | 123367446 |
| chr8 | 123372331 | 123372476 |
| chr8 | 123378451 | 123378716 |
| chr8 | 123379461 | 123379676 |
| chr8 | 123382571 | 123382736 |
| chr8 | 123383751 | 123383876 |
| chr8 | 123391771 | 123391926 |
| chr8 | 123393901 | 123394016 |
| chr8 | 123400741 | 123400936 |
| chr8 | 123426091 | 123426226 |
| chr8 | 123428991 | 123429086 |
| chr8 | 123435871 | 123436336 |
| chr8 | 123436551 | 123436956 |
| chr8 | 123438151 | 123438316 |
| chr8 | 123501551 | 123501706 |
| chr8 | 123590371 | 123590536 |
| chr8 | 123590581 | 123590756 |
| chr8 | 123629701 | 123629846 |
| chr8 | 123641281 | 123641536 |
| chr8 | 123717931 | 123718376 |
| chr8 | 123719131 | 123719376 |
| chr8 | 123790051 | 123790256 |
| chr8 | 123826271 | 123826426 |
| chr8 | 123843461 | 123843586 |
| chr8 | 123845491 | 123845636 |
| chr8 | 123873531 | 123873716 |
| chr8 | 123888721 | 123888886 |
| chr8 | 123889001 | 123889096 |

|      |           |           |
|------|-----------|-----------|
| chr8 | 123909861 | 123909996 |
| chr8 | 123912371 | 123912586 |
| chr8 | 124034411 | 124034556 |
| chr8 | 124034631 | 124034726 |
| chr8 | 124034771 | 124034956 |
| chr8 | 124060991 | 124061366 |
| chr8 | 124066751 | 124066926 |
| chr8 | 124066951 | 124067286 |
| chr8 | 124078521 | 124078616 |
| chr8 | 124113021 | 124113216 |
| chr8 | 124115851 | 124115996 |
| chr8 | 124116661 | 124116786 |
| chr8 | 124127551 | 124127706 |
| chr8 | 124127891 | 124128216 |
| chr8 | 124128761 | 124129076 |
| chr8 | 124138981 | 124139076 |
| chr8 | 124139091 | 124139346 |
| chr8 | 124142371 | 124142486 |
| chr8 | 124144021 | 124144286 |
| chr8 | 124144371 | 124144586 |
| chr8 | 124144611 | 124144806 |
| chr8 | 124144891 | 124145066 |
| chr8 | 124149631 | 124149776 |
| chr8 | 124166531 | 124166686 |
| chr8 | 124169231 | 124169466 |
| chr8 | 124169671 | 124169806 |
| chr8 | 124174931 | 124175046 |
| chr8 | 124180001 | 124180646 |
| chr8 | 124184591 | 124184766 |
| chr8 | 124186821 | 124187216 |
| chr8 | 124187461 | 124187566 |
| chr8 | 124187671 | 124188076 |
| chr8 | 124188591 | 124188896 |
| chr8 | 124196881 | 124197236 |
| chr8 | 124202011 | 124202246 |
| chr8 | 124202281 | 124202436 |
| chr8 | 124232161 | 124232316 |
| chr8 | 124239201 | 124239336 |
| chr8 | 124240871 | 124241206 |
| chr8 | 124245151 | 124245516 |
| chr8 | 124245581 | 124245816 |
| chr8 | 124254891 | 124255136 |
| chr8 | 124263851 | 124264016 |
| chr8 | 124264061 | 124264156 |
| chr8 | 124277781 | 124277956 |
| chr8 | 124278361 | 124278586 |
| chr8 | 124282311 | 124282436 |
| chr8 | 124319411 | 124319826 |
| chr8 | 124339521 | 124339696 |
| chr8 | 124377771 | 124377866 |
| chr8 | 124782571 | 124782836 |
| chr8 | 124928251 | 124928666 |
| chr8 | 124943151 | 124943306 |

|      |           |           |
|------|-----------|-----------|
| chr8 | 124946471 | 124946596 |
| chr8 | 124997081 | 124997316 |
| chr8 | 124997871 | 124998066 |
| chr8 | 125026111 | 125026226 |
| chr8 | 125053671 | 125053756 |
| chr8 | 125170861 | 125171266 |
| chr8 | 125173061 | 125173336 |
| chr8 | 125182591 | 125182986 |
| chr8 | 125184361 | 125184476 |
| chr8 | 125199371 | 125199536 |
| chr8 | 125199551 | 125199906 |
| chr8 | 125236751 | 125236896 |
| chr8 | 125389821 | 125390016 |
| chr8 | 125390221 | 125390356 |
| chr8 | 125455141 | 125455296 |
| chr8 | 125472471 | 125472586 |
| chr8 | 125521981 | 125522096 |
| chr8 | 125555571 | 125555786 |
| chr8 | 125571561 | 125571866 |
| chr8 | 125631471 | 125631876 |
| chr8 | 125698181 | 125698286 |
| chr8 | 125705991 | 125706086 |
| chr8 | 125714361 | 125714526 |
| chr8 | 125887571 | 125887726 |
| chr8 | 125904861 | 125905026 |
| chr8 | 126021651 | 126021846 |
| chr8 | 126021931 | 126022096 |
| chr8 | 126638471 | 126638596 |
| chr8 | 126646731 | 126646836 |
| chr8 | 126647811 | 126647906 |
| chr8 | 126666921 | 126667126 |
| chr8 | 126667431 | 126667656 |
| chr8 | 126680071 | 126680446 |
| chr8 | 126985471 | 126985616 |
| chr8 | 127068291 | 127068436 |
| chr8 | 127160631 | 127160866 |
| chr8 | 127180401 | 127180556 |
| chr8 | 127335611 | 127335766 |
| chr8 | 127540061 | 127540156 |
| chr8 | 127640331 | 127640446 |
| chr8 | 127640541 | 127640856 |
| chr8 | 127666371 | 127666726 |
| chr8 | 127845961 | 127846276 |
| chr8 | 127846681 | 127846886 |
| chr8 | 127855811 | 127856046 |
| chr8 | 128021201 | 128021366 |
| chr8 | 128043271 | 128043686 |
| chr8 | 128043751 | 128043856 |
| chr8 | 128086771 | 128087026 |
| chr8 | 128121931 | 128122126 |
| chr8 | 128169451 | 128169606 |
| chr8 | 128223921 | 128224226 |
| chr8 | 128235411 | 128235756 |

|       |           |           |
|-------|-----------|-----------|
| chr8  | 128274981 | 128275156 |
| chr8  | 128283061 | 128283246 |
| chr8  | 128376601 | 128376796 |
| chr8  | 128424231 | 128424456 |
| chr8  | 128444811 | 128444976 |
| chr8  | 128476891 | 128477126 |
| chr8  | 128477851 | 128477936 |
| chr8  | 128505141 | 128505346 |
| chr8  | 128505561 | 128505766 |
| chr8  | 128506921 | 128507146 |
| chr8  | 128586571 | 128586676 |
| chr8  | 128610021 | 128610116 |
| chr8  | 128729691 | 128729826 |
| chr8  | 128742821 | 128743016 |
| chr8  | 128754881 | 128755196 |
| chr8  | 128803381 | 128803556 |
| chr8  | 128805701 | 128805896 |
| chr8  | 128806121 | 128806316 |
| chr8  | 128941251 | 128941316 |
| chr8  | 129020031 | 129020206 |
| chr8  | 129060931 | 129061016 |
| chr8  | 129384361 | 129384426 |
| chr8  | 129402751 | 129403166 |
| chr8  | 129425801 | 129426076 |
| chr8  | 129452791 | 129453126 |
| chr8  | 129474831 | 129474976 |
| chr8  | 129476121 | 129476276 |
| chr8  | 129496491 | 129496646 |
| chr8  | 129497041 | 129497176 |
| chr8  | 129547761 | 129547926 |
| chr8  | 129622681 | 129622806 |
| chr8  | 129622931 | 129623036 |
| chr8  | 129623111 | 129623396 |
| chr8  | 129686451 | 129686696 |
| chr8  | 129712431 | 129712786 |
| chr8  | 129715551 | 129715666 |
| chr8  | 129725401 | 129725696 |
| chr8  | 129770391 | 129770676 |
| chr8  | 129800661 | 129800806 |
| chr8  | 129800841 | 129801106 |
| chr8  | 129975211 | 129975326 |
| chr8  | 130029841 | 130030056 |
| chr8  | 130162161 | 130162276 |
| chr8  | 130182651 | 130182776 |
| chr8  | 130182961 | 130183196 |
| chr8  | 130183791 | 130183916 |
| chr8  | 130385511 | 130385686 |
| chr8  | 130434651 | 130434906 |
| chr8  | 130606311 | 130606406 |
| chr8  | 131311121 | 131311386 |
| chr8  | 131403881 | 131404036 |
| chr8  | 131415151 | 131415306 |
| chr13 | 3890781   | 3890896   |

|       |          |          |
|-------|----------|----------|
| chr13 | 3890951  | 3891106  |
| chr13 | 5742601  | 5742696  |
| chr13 | 5801441  | 5801606  |
| chr13 | 5802091  | 5802426  |
| chr13 | 5844461  | 5844626  |
| chr13 | 5894301  | 5894416  |
| chr13 | 5896571  | 5896676  |
| chr13 | 6890591  | 6890746  |
| chr13 | 6984401  | 6984556  |
| chr13 | 6991961  | 6992146  |
| chr13 | 7195421  | 7195636  |
| chr13 | 8191281  | 8191456  |
| chr13 | 8525711  | 8525796  |
| chr13 | 8822421  | 8822666  |
| chr13 | 9159481  | 9159586  |
| chr13 | 9282411  | 9282626  |
| chr13 | 9503561  | 9503726  |
| chr13 | 11603561 | 11603696 |
| chr13 | 11934671 | 11934826 |
| chr13 | 11957481 | 11957616 |
| chr13 | 12214391 | 12214546 |
| chr13 | 12217401 | 12217556 |
| chr13 | 12321791 | 12321946 |
| chr13 | 13276621 | 13276756 |
| chr13 | 13327511 | 13327636 |
| chr13 | 15278401 | 15278516 |
| chr13 | 15333051 | 15333276 |
| chr13 | 15334171 | 15334346 |
| chr13 | 15334941 | 15335106 |
| chr13 | 15455751 | 15455896 |
| chr13 | 15814461 | 15814606 |
| chr13 | 16712851 | 16712956 |
| chr13 | 16970471 | 16970666 |
| chr13 | 18163301 | 18163426 |
| chr13 | 18212851 | 18212946 |
| chr13 | 18226231 | 18226396 |
| chr13 | 18465151 | 18465366 |
| chr13 | 18501571 | 18501716 |
| chr13 | 18588131 | 18588296 |
| chr13 | 18776341 | 18776476 |
| chr13 | 20316191 | 20316286 |
| chr13 | 20520181 | 20520336 |
| chr13 | 23738061 | 23738246 |
| chr13 | 24070411 | 24070536 |
| chr13 | 24142841 | 24143066 |
| chr13 | 24143151 | 24143706 |
| chr13 | 24257631 | 24257796 |
| chr13 | 24535431 | 24535556 |
| chr13 | 24559731 | 24559916 |
| chr13 | 25090641 | 25090766 |
| chr13 | 25090811 | 25090946 |
| chr13 | 25409331 | 25409436 |
| chr13 | 25625131 | 25625246 |



|       |          |          |
|-------|----------|----------|
| chr13 | 25823811 | 25823926 |
| chr13 | 26941431 | 26941556 |
| chr13 | 26941581 | 26941696 |
| chr13 | 28301401 | 28301536 |
| chr13 | 28408051 | 28408246 |
| chr13 | 28423751 | 28424066 |
| chr13 | 28425701 | 28425816 |
| chr13 | 28429721 | 28429856 |
| chr13 | 28458271 | 28458426 |
| chr13 | 28550231 | 28550396 |
| chr13 | 28551521 | 28551836 |
| chr13 | 28552071 | 28552176 |
| chr13 | 28641071 | 28641376 |
| chr13 | 28671011 | 28671276 |
| chr13 | 28674491 | 28674626 |
| chr13 | 28679101 | 28679256 |
| chr13 | 28700151 | 28700386 |
| chr13 | 28700901 | 28701036 |
| chr13 | 28725791 | 28726116 |
| chr13 | 28726281 | 28726476 |
| chr13 | 28745431 | 28745556 |
| chr13 | 28745771 | 28745866 |
| chr13 | 28747771 | 28747926 |
| chr13 | 28776211 | 28776556 |
| chr13 | 28778681 | 28778776 |
| chr13 | 28783271 | 28783406 |
| chr13 | 28784741 | 28784906 |
| chr13 | 28785971 | 28786116 |
| chr13 | 28790471 | 28790586 |
| chr13 | 28794701 | 28794806 |
| chr13 | 28800761 | 28800866 |
| chr13 | 28809131 | 28809286 |
| chr13 | 28830051 | 28830206 |
| chr13 | 28846591 | 28846856 |
| chr13 | 28851361 | 28851456 |
| chr13 | 28852861 | 28853016 |
| chr13 | 28854841 | 28854936 |
| chr13 | 28863591 | 28863686 |
| chr13 | 28982221 | 28982316 |
| chr13 | 28996531 | 28996726 |
| chr13 | 29022341 | 29022476 |
| chr13 | 29022931 | 29023066 |
| chr13 | 29056711 | 29056806 |
| chr13 | 29218161 | 29218286 |
| chr13 | 29229951 | 29230126 |
| chr13 | 29289201 | 29289326 |
| chr13 | 29368381 | 29368516 |
| chr13 | 29619821 | 29619946 |
| chr13 | 29629401 | 29629586 |
| chr13 | 29743381 | 29743516 |
| chr13 | 29783131 | 29783296 |
| chr13 | 29788261 | 29788366 |
| chr13 | 29788421 | 29788576 |

|       |          |          |
|-------|----------|----------|
| chr13 | 29839391 | 29839496 |
| chr13 | 30059311 | 30059776 |
| chr13 | 30243051 | 30243146 |
| chr13 | 30262141 | 30262236 |
| chr13 | 30375561 | 30375686 |
| chr13 | 30375791 | 30376006 |
| chr13 | 30730161 | 30730346 |
| chr13 | 30974161 | 30974286 |
| chr13 | 31087851 | 31087946 |
| chr13 | 31408881 | 31409066 |
| chr13 | 31539131 | 31539556 |
| chr13 | 31805641 | 31805766 |
| chr13 | 31962671 | 31962816 |
| chr13 | 32030871 | 32030996 |
| chr13 | 32526091 | 32526196 |
| chr13 | 32714241 | 32714396 |
| chr13 | 33929541 | 33929726 |
| chr13 | 34077981 | 34078246 |
| chr13 | 34248821 | 34248976 |
| chr13 | 34360871 | 34361006 |
| chr13 | 34361011 | 34361136 |
| chr13 | 34468691 | 34468836 |
| chr13 | 34878841 | 34878996 |
| chr13 | 35037581 | 35037726 |
| chr13 | 35196851 | 35197036 |
| chr13 | 35510741 | 35510956 |
| chr13 | 35511001 | 35511166 |
| chr13 | 35781421 | 35781526 |
| chr13 | 36233491 | 36233646 |
| chr13 | 36253821 | 36253976 |
| chr13 | 36287501 | 36287636 |
| chr13 | 36290741 | 36290906 |
| chr13 | 36290961 | 36291206 |
| chr13 | 36442781 | 36442966 |
| chr13 | 36455441 | 36455576 |
| chr13 | 36456571 | 36456686 |
| chr13 | 36655791 | 36655966 |
| chr13 | 37521991 | 37522086 |
| chr13 | 37884111 | 37884256 |
| chr13 | 38140591 | 38140736 |
| chr13 | 38200891 | 38201076 |
| chr13 | 38400591 | 38400666 |
| chr13 | 38516701 | 38516826 |
| chr13 | 39264331 | 39264486 |
| chr13 | 39888461 | 39888566 |
| chr13 | 39888871 | 39889066 |
| chr13 | 39915481 | 39915626 |
| chr13 | 40296191 | 40296416 |
| chr13 | 40392891 | 40393036 |
| chr13 | 40443511 | 40443656 |
| chr13 | 40617511 | 40617616 |
| chr13 | 40654051 | 40654296 |
| chr13 | 40662191 | 40662376 |

|       |          |          |
|-------|----------|----------|
| chr13 | 40713991 | 40714096 |
| chr13 | 40870731 | 40871146 |
| chr13 | 41246951 | 41247046 |
| chr13 | 41304411 | 41304506 |
| chr13 | 41365921 | 41366076 |
| chr13 | 41370631 | 41370836 |
| chr13 | 41370901 | 41371096 |
| chr13 | 41696611 | 41696756 |
| chr13 | 41761671 | 41761796 |
| chr13 | 42066231 | 42066376 |
| chr13 | 42276851 | 42276986 |
| chr13 | 42347391 | 42347576 |
| chr13 | 42538161 | 42538276 |
| chr13 | 42730461 | 42730626 |
| chr13 | 42824651 | 42824916 |
| chr13 | 43105631 | 43105726 |
| chr13 | 43120391 | 43120476 |
| chr13 | 43202721 | 43203076 |
| chr13 | 43527941 | 43528016 |
| chr13 | 43541911 | 43542076 |
| chr13 | 43542261 | 43542416 |
| chr13 | 43658371 | 43658466 |
| chr13 | 43731581 | 43731746 |
| chr13 | 43919101 | 43919206 |
| chr13 | 43961021 | 43961236 |
| chr13 | 44002621 | 44002776 |
| chr13 | 44002821 | 44002956 |
| chr13 | 44021081 | 44021216 |
| chr13 | 44029321 | 44029626 |
| chr13 | 44054521 | 44054646 |
| chr13 | 44060591 | 44060856 |
| chr13 | 44067061 | 44067266 |
| chr13 | 44111791 | 44112006 |
| chr13 | 44144541 | 44144696 |
| chr13 | 44193951 | 44194086 |
| chr13 | 44220071 | 44220256 |
| chr13 | 44239481 | 44239586 |
| chr13 | 44239771 | 44239926 |
| chr13 | 44240011 | 44240246 |
| chr13 | 44240291 | 44240606 |
| chr13 | 44267241 | 44267306 |
| chr13 | 44328361 | 44328486 |
| chr13 | 44350661 | 44350766 |
| chr13 | 44379401 | 44379516 |
| chr13 | 44381631 | 44381806 |
| chr13 | 44386701 | 44386896 |
| chr13 | 44386991 | 44387216 |
| chr13 | 44402021 | 44402186 |
| chr13 | 44424141 | 44424246 |
| chr13 | 44428161 | 44428386 |
| chr13 | 44484671 | 44484776 |
| chr13 | 44518041 | 44518206 |
| chr13 | 44520541 | 44520666 |

|       |          |          |
|-------|----------|----------|
| chr13 | 44521321 | 44521456 |
| chr13 | 44584561 | 44584666 |
| chr13 | 44595471 | 44595606 |
| chr13 | 44626681 | 44626776 |
| chr13 | 44626791 | 44626896 |
| chr13 | 44645441 | 44645776 |
| chr13 | 44646061 | 44646196 |
| chr13 | 44684351 | 44684626 |
| chr13 | 44712481 | 44712686 |
| chr13 | 44727641 | 44727816 |
| chr13 | 44851561 | 44851776 |
| chr13 | 44879091 | 44879226 |
| chr13 | 44943981 | 44944186 |
| chr13 | 45044921 | 45045146 |
| chr13 | 45094821 | 45094916 |
| chr13 | 45262671 | 45262776 |
| chr13 | 45273091 | 45273166 |
| chr13 | 45466271 | 45466546 |
| chr13 | 45469561 | 45469706 |
| chr13 | 45480501 | 45480596 |
| chr13 | 45480611 | 45480786 |
| chr13 | 45541891 | 45542016 |
| chr13 | 45631471 | 45631616 |
| chr13 | 45789141 | 45789266 |
| chr13 | 45815241 | 45815376 |
| chr13 | 45817351 | 45817506 |
| chr13 | 45820911 | 45821056 |
| chr13 | 45831871 | 45832076 |
| chr13 | 45962111 | 45962286 |
| chr13 | 46020031 | 46020176 |
| chr13 | 46191631 | 46191746 |
| chr13 | 46191801 | 46191976 |
| chr13 | 46199511 | 46199646 |
| chr13 | 46433481 | 46433696 |
| chr13 | 46526611 | 46526786 |
| chr13 | 46541421 | 46541546 |
| chr13 | 46556191 | 46556356 |
| chr13 | 46582101 | 46582216 |
| chr13 | 46756121 | 46756266 |
| chr13 | 46922201 | 46922346 |
| chr13 | 46922761 | 46923076 |
| chr13 | 46946301 | 46946446 |
| chr13 | 47065001 | 47065206 |
| chr13 | 47288261 | 47288476 |
| chr13 | 47288501 | 47288656 |
| chr13 | 47321941 | 47322126 |
| chr13 | 47347001 | 47347186 |
| chr13 | 47379441 | 47379606 |
| chr13 | 47577611 | 47577686 |
| chr13 | 47655931 | 47656116 |
| chr13 | 47860361 | 47860526 |
| chr13 | 47884731 | 47884926 |
| chr13 | 47966721 | 47966836 |

|       |          |          |
|-------|----------|----------|
| chr13 | 47967211 | 47967346 |
| chr13 | 47986041 | 47986206 |
| chr13 | 47986221 | 47986506 |
| chr13 | 48348101 | 48348366 |
| chr13 | 48768801 | 48768956 |
| chr13 | 49386371 | 49386476 |
| chr13 | 49778321 | 49778506 |
| chr13 | 51030511 | 51030686 |
| chr13 | 51030841 | 51030996 |
| chr13 | 51067041 | 51067156 |
| chr13 | 51085621 | 51085736 |
| chr13 | 51292581 | 51292726 |
| chr13 | 51292811 | 51292926 |
| chr13 | 51324531 | 51324626 |
| chr13 | 51497951 | 51498046 |
| chr13 | 51654491 | 51654626 |
| chr13 | 51764121 | 51764256 |
| chr13 | 51765271 | 51765436 |
| chr13 | 51765881 | 51766036 |
| chr13 | 51836231 | 51836356 |
| chr13 | 51836941 | 51837096 |
| chr13 | 51855311 | 51855406 |
| chr13 | 51865411 | 51865596 |
| chr13 | 51865781 | 51865896 |
| chr13 | 51966251 | 51966406 |
| chr13 | 51975301 | 51975416 |
| chr13 | 52037661 | 52037866 |
| chr13 | 52037961 | 52038096 |
| chr13 | 52097851 | 52097976 |
| chr13 | 52112881 | 52113026 |
| chr13 | 52121121 | 52121276 |
| chr13 | 52351671 | 52351826 |
| chr13 | 52533771 | 52533896 |
| chr13 | 52777901 | 52778086 |
| chr13 | 52778101 | 52778536 |
| chr13 | 52924331 | 52924606 |
| chr13 | 52925221 | 52925376 |
| chr13 | 52925871 | 52926026 |
| chr13 | 52926991 | 52927176 |
| chr13 | 52989081 | 52989206 |
| chr13 | 53094401 | 53094486 |
| chr13 | 53112251 | 53112406 |
| chr13 | 53138561 | 53138696 |
| chr13 | 53155351 | 53155526 |
| chr13 | 53155921 | 53156036 |
| chr13 | 53170651 | 53170716 |
| chr13 | 53176081 | 53176316 |
| chr13 | 53187681 | 53187836 |
| chr13 | 53191291 | 53191526 |
| chr13 | 53200711 | 53200976 |
| chr13 | 53201061 | 53201246 |
| chr13 | 53213981 | 53214316 |
| chr13 | 53214371 | 53214466 |

|       |          |          |
|-------|----------|----------|
| chr13 | 53234661 | 53234796 |
| chr13 | 53239141 | 53239286 |
| chr13 | 53282701 | 53282816 |
| chr13 | 53284631 | 53284896 |
| chr13 | 53300681 | 53301016 |
| chr13 | 53310401 | 53310596 |
| chr13 | 53310731 | 53310816 |
| chr13 | 53689211 | 53689416 |
| chr13 | 53689431 | 53689536 |
| chr13 | 54258161 | 54258396 |
| chr13 | 54267491 | 54267716 |
| chr13 | 54273431 | 54273576 |
| chr13 | 54323641 | 54323776 |
| chr13 | 54339251 | 54339526 |
| chr13 | 54430011 | 54430086 |
| chr13 | 54442941 | 54443036 |
| chr13 | 54670661 | 54670796 |
| chr13 | 54670911 | 54671036 |
| chr13 | 54816171 | 54816556 |
| chr13 | 54969091 | 54969686 |
| chr13 | 55023751 | 55023916 |
| chr13 | 55162741 | 55162906 |
| chr13 | 55181591 | 55181886 |
| chr13 | 55858541 | 55858826 |
| chr13 | 55858861 | 55859006 |
| chr13 | 55877131 | 55877246 |
| chr13 | 55877311 | 55877666 |
| chr13 | 55972051 | 55972206 |
| chr13 | 55975861 | 55976006 |
| chr13 | 55986661 | 55986866 |
| chr13 | 56034121 | 56034276 |
| chr13 | 56062401 | 56062626 |
| chr13 | 56079401 | 56079526 |
| chr13 | 56236011 | 56236226 |
| chr13 | 56236271 | 56236416 |
| chr13 | 56238481 | 56238706 |
| chr13 | 56250061 | 56250226 |
| chr13 | 56391071 | 56391166 |
| chr13 | 56428811 | 56428966 |
| chr13 | 56467811 | 56467976 |
| chr13 | 56515301 | 56515396 |
| chr13 | 56515581 | 56515686 |
| chr13 | 56558271 | 56558406 |
| chr13 | 56570291 | 56570426 |
| chr13 | 56591801 | 56591986 |
| chr13 | 56592561 | 56592676 |
| chr13 | 56632201 | 56632316 |
| chr13 | 56708131 | 56708256 |
| chr13 | 56872471 | 56872576 |
| chr13 | 56926431 | 56926546 |
| chr13 | 57117611 | 57117906 |
| chr13 | 57256111 | 57256296 |
| chr13 | 57318121 | 57318406 |

|       |          |          |
|-------|----------|----------|
| chr13 | 57613221 | 57613316 |
| chr13 | 57751401 | 57751516 |
| chr13 | 57887821 | 57887936 |
| chr13 | 57940981 | 57941106 |
| chr13 | 57941421 | 57941556 |
| chr13 | 57952341 | 57952576 |
| chr13 | 57952801 | 57952926 |
| chr13 | 58005451 | 58006106 |
| chr13 | 58006121 | 58006316 |
| chr13 | 58006501 | 58006666 |
| chr13 | 58067591 | 58067826 |
| chr13 | 58068101 | 58068446 |
| chr13 | 58132371 | 58132566 |
| chr13 | 58132651 | 58132846 |
| chr13 | 58460251 | 58460406 |
| chr13 | 58460501 | 58460836 |
| chr13 | 58906021 | 58906146 |
| chr13 | 58946041 | 58946136 |
| chr13 | 58974371 | 58974526 |
| chr13 | 58981281 | 58981466 |
| chr13 | 58995801 | 58996176 |
| chr13 | 59008931 | 59009086 |
| chr13 | 59020541 | 59020896 |
| chr13 | 59306391 | 59306536 |
| chr13 | 59564951 | 59565116 |
| chr13 | 59656381 | 59656556 |
| chr13 | 59901971 | 59902106 |
| chr13 | 60002701 | 60002826 |
| chr13 | 60132821 | 60132926 |
| chr13 | 60135951 | 60136056 |
| chr13 | 60138071 | 60138206 |
| chr13 | 60143211 | 60143386 |
| chr13 | 60166041 | 60166176 |
| chr13 | 60180951 | 60181126 |
| chr13 | 60235811 | 60236146 |
| chr13 | 60265471 | 60265606 |
| chr13 | 60277281 | 60277456 |
| chr13 | 60279311 | 60279456 |
| chr13 | 60296311 | 60296496 |
| chr13 | 60357691 | 60357836 |
| chr13 | 60437371 | 60437476 |
| chr13 | 60445161 | 60445256 |
| chr13 | 60490571 | 60490746 |
| chr13 | 60501891 | 60502036 |
| chr13 | 60507161 | 60507256 |
| chr13 | 60507441 | 60507866 |
| chr13 | 60538981 | 60539176 |
| chr13 | 60606471 | 60606586 |
| chr13 | 60612791 | 60612896 |
| chr13 | 60695751 | 60695986 |
| chr13 | 60717181 | 60717416 |
| chr13 | 63122861 | 63122956 |
| chr13 | 63314661 | 63315126 |

|       |          |          |
|-------|----------|----------|
| chr13 | 63522871 | 63523126 |
| chr13 | 63563711 | 63564166 |
| chr13 | 63567611 | 63567926 |
| chr13 | 63619011 | 63619296 |
| chr13 | 64030151 | 64030316 |
| chr13 | 64044301 | 64044396 |
| chr13 | 64116901 | 64117036 |
| chr13 | 64117041 | 64117186 |
| chr13 | 64117501 | 64117636 |
| chr13 | 64117661 | 64117726 |
| chr13 | 64169791 | 64169876 |
| chr13 | 64266311 | 64266706 |
| chr13 | 67432491 | 67432616 |
| chr13 | 68365521 | 68365626 |
| chr13 | 69541301 | 69541426 |
| chr13 | 69885361 | 69885476 |
| chr13 | 69885811 | 69885926 |
| chr13 | 69886191 | 69886296 |
| chr13 | 69910331 | 69910476 |
| chr13 | 69966281 | 69966356 |
| chr13 | 70016961 | 70017146 |
| chr13 | 70645461 | 70645596 |
| chr13 | 70906251 | 70906326 |
| chr13 | 71038201 | 71038336 |
| chr13 | 71237451 | 71237556 |
| chr13 | 71370321 | 71370386 |
| chr13 | 71370411 | 71370536 |
| chr13 | 71606541 | 71606676 |
| chr13 | 71616881 | 71617106 |
| chr13 | 71626091 | 71626336 |
| chr13 | 71633071 | 71633276 |
| chr13 | 71729231 | 71729346 |
| chr13 | 71737881 | 71738186 |
| chr13 | 71856411 | 71856566 |
| chr13 | 71926191 | 71926376 |
| chr13 | 72120201 | 72120356 |
| chr13 | 72155391 | 72155496 |
| chr13 | 72418071 | 72418166 |
| chr13 | 72676051 | 72676226 |
| chr13 | 72754411 | 72754656 |
| chr13 | 72759491 | 72759656 |
| chr13 | 72764651 | 72764816 |
| chr13 | 72801951 | 72802076 |
| chr13 | 72831651 | 72831746 |
| chr13 | 72831961 | 72832066 |
| chr13 | 72832311 | 72832626 |
| chr13 | 72832761 | 72832876 |
| chr13 | 72832981 | 72833136 |
| chr13 | 72867511 | 72867726 |
| chr13 | 72975781 | 72975966 |
| chr13 | 73101161 | 73101316 |
| chr13 | 73193401 | 73193666 |
| chr13 | 73254611 | 73254776 |



|       |          |          |
|-------|----------|----------|
| chr13 | 73269471 | 73269616 |
| chr13 | 73282321 | 73282516 |
| chr13 | 73361021 | 73361186 |
| chr13 | 73459191 | 73459416 |
| chr13 | 73536241 | 73536586 |
| chr13 | 73536701 | 73536876 |
| chr13 | 73583241 | 73583366 |
| chr13 | 73583551 | 73583716 |
| chr13 | 73597451 | 73597726 |
| chr13 | 73738601 | 73738736 |
| chr13 | 73781981 | 73782126 |
| chr13 | 73782131 | 73782266 |
| chr13 | 77288651 | 77288816 |
| chr13 | 77634821 | 77635026 |
| chr13 | 77993001 | 77993126 |
| chr13 | 78357381 | 78357496 |
| chr13 | 78909621 | 78909756 |
| chr13 | 79040591 | 79040786 |
| chr13 | 79089241 | 79089406 |
| chr13 | 79105701 | 79105796 |
| chr13 | 79718841 | 79718996 |
| chr13 | 79741521 | 79741636 |
| chr13 | 79760961 | 79761096 |
| chr13 | 79809491 | 79809736 |
| chr13 | 79857581 | 79857726 |
| chr13 | 82000731 | 82000916 |
| chr13 | 82047651 | 82047846 |
| chr13 | 82072461 | 82072666 |
| chr13 | 82269391 | 82269576 |
| chr13 | 82455521 | 82455616 |
| chr13 | 83808301 | 83808486 |
| chr13 | 84043791 | 84043886 |
| chr13 | 84124411 | 84124556 |
| chr13 | 84212941 | 84213146 |
| chr13 | 84217511 | 84217656 |
| chr13 | 84346091 | 84346266 |
| chr13 | 84450121 | 84450226 |
| chr13 | 84532451 | 84532666 |
| chr13 | 85085761 | 85085846 |
| chr13 | 85098631 | 85098776 |
| chr13 | 89900231 | 89900436 |
| chr13 | 90014871 | 90015026 |
| chr13 | 90021601 | 90021716 |
| chr13 | 90023721 | 90023836 |
| chr13 | 90661771 | 90661896 |
| chr13 | 90965311 | 90965486 |
| chr13 | 91305361 | 91305596 |
| chr13 | 91513781 | 91513886 |
| chr13 | 91603461 | 91603576 |
| chr13 | 91643271 | 91643406 |
| chr13 | 91799731 | 91799846 |
| chr13 | 91866901 | 91867006 |
| chr13 | 93366141 | 93366276 |

|       |          |          |
|-------|----------|----------|
| chr13 | 93400751 | 93400996 |
| chr13 | 93642181 | 93642286 |
| chr13 | 93689381 | 93689486 |
| chr13 | 93693781 | 93694076 |
| chr13 | 93737811 | 93737986 |
| chr13 | 93837711 | 93837856 |
| chr13 | 94333251 | 94333406 |
| chr13 | 94953381 | 94953486 |
| chr13 | 95052411 | 95052516 |
| chr13 | 95076551 | 95076736 |
| chr13 | 95128401 | 95128526 |
| chr13 | 95156521 | 95156656 |
| chr13 | 95162311 | 95162426 |
| chr13 | 95164841 | 95164946 |
| chr13 | 95165331 | 95165546 |
| chr13 | 95165561 | 95165716 |
| chr13 | 95170371 | 95170486 |
| chr13 | 95170691 | 95171036 |
| chr13 | 95177681 | 95177846 |
| chr13 | 95185131 | 95185246 |
| chr13 | 95187851 | 95188036 |
| chr13 | 95199281 | 95199396 |
| chr13 | 95199681 | 95199846 |
| chr13 | 95213661 | 95213986 |
| chr13 | 95237371 | 95237506 |
| chr13 | 95243761 | 95243956 |
| chr13 | 95244161 | 95244316 |
| chr13 | 95289801 | 95289886 |
| chr13 | 95341561 | 95341756 |
| chr13 | 95360041 | 95360186 |
| chr13 | 95410471 | 95410646 |
| chr13 | 95547461 | 95547626 |
| chr13 | 95661601 | 95661716 |
| chr13 | 95661761 | 95661826 |
| chr13 | 95665151 | 95665306 |
| chr13 | 95677521 | 95677786 |
| chr13 | 95697451 | 95697686 |
| chr13 | 95702221 | 95702376 |
| chr13 | 95709411 | 95709496 |
| chr13 | 95781571 | 95781686 |
| chr13 | 95804251 | 95804416 |
| chr13 | 95808631 | 95808766 |
| chr13 | 96222661 | 96222806 |
| chr13 | 96407451 | 96407606 |
| chr13 | 96519901 | 96520166 |
| chr13 | 96595001 | 96595126 |
| chr13 | 96649091 | 96649536 |
| chr13 | 96649591 | 96649776 |
| chr13 | 96650221 | 96650356 |
| chr13 | 96756101 | 96756336 |
| chr13 | 96772241 | 96772356 |
| chr13 | 96865811 | 96865906 |
| chr13 | 96865971 | 96866096 |

|       |           |           |
|-------|-----------|-----------|
| chr13 | 96875591  | 96875916  |
| chr13 | 96876131  | 96876286  |
| chr13 | 96951421  | 96951576  |
| chr13 | 96952471  | 96952626  |
| chr13 | 97202351  | 97202506  |
| chr13 | 97671661  | 97671916  |
| chr13 | 98029311  | 98029506  |
| chr13 | 98030971  | 98031156  |
| chr13 | 98147691  | 98147836  |
| chr13 | 98279931  | 98280036  |
| chr13 | 98353231  | 98353386  |
| chr13 | 98455691  | 98455786  |
| chr13 | 98458081  | 98458196  |
| chr13 | 98570351  | 98570546  |
| chr13 | 98707781  | 98707956  |
| chr13 | 98847811  | 98847966  |
| chr13 | 98926211  | 98926316  |
| chr13 | 98930011  | 98930236  |
| chr13 | 98992721  | 98992876  |
| chr13 | 99028081  | 99028226  |
| chr13 | 99028351  | 99028726  |
| chr13 | 99054451  | 99054606  |
| chr13 | 99098891  | 99098986  |
| chr13 | 99099031  | 99099096  |
| chr13 | 99112371  | 99112506  |
| chr13 | 99116211  | 99116716  |
| chr13 | 99134231  | 99134346  |
| chr13 | 99193781  | 99193926  |
| chr13 | 99521011  | 99521166  |
| chr13 | 99531151  | 99531296  |
| chr13 | 99577941  | 99578066  |
| chr13 | 99578191  | 99578316  |
| chr13 | 99597151  | 99597306  |
| chr13 | 99646131  | 99646236  |
| chr13 | 99686781  | 99686966  |
| chr13 | 99689941  | 99690106  |
| chr13 | 99694221  | 99694346  |
| chr13 | 99694401  | 99694486  |
| chr13 | 99727101  | 99727246  |
| chr13 | 99779921  | 99780026  |
| chr13 | 99799631  | 99799806  |
| chr13 | 99828701  | 99828826  |
| chr13 | 100042251 | 100042366 |
| chr13 | 100045981 | 100046156 |
| chr13 | 100052181 | 100052306 |
| chr13 | 100121381 | 100121546 |
| chr13 | 100130761 | 100130906 |
| chr13 | 100131071 | 100131246 |
| chr13 | 100173281 | 100173436 |
| chr13 | 100192391 | 100192586 |
| chr13 | 100192591 | 100192896 |
| chr13 | 100320701 | 100320856 |
| chr13 | 100451541 | 100451646 |

|       |           |           |
|-------|-----------|-----------|
| chr13 | 100456201 | 100456326 |
| chr13 | 100473421 | 100473546 |
| chr13 | 100541911 | 100542076 |
| chr13 | 100542441 | 100542546 |
| chr13 | 100575291 | 100575466 |
| chr13 | 100575721 | 100575826 |
| chr13 | 100601741 | 100601936 |
| chr13 | 100649931 | 100650076 |
| chr13 | 100824351 | 100824546 |
| chr13 | 100829371 | 100829486 |
| chr13 | 100894751 | 100894896 |
| chr13 | 102334261 | 102334396 |
| chr13 | 102731911 | 102732066 |
| chr13 | 102858091 | 102858316 |
| chr13 | 102912241 | 102912416 |
| chr13 | 103065971 | 103066096 |
| chr13 | 103232601 | 103232816 |
| chr13 | 103434671 | 103434876 |
| chr13 | 103637951 | 103638036 |
| chr13 | 103646581 | 103646676 |
| chr13 | 103749631 | 103749816 |
| chr13 | 103757561 | 103757676 |
| chr13 | 103890711 | 103890826 |
| chr13 | 103895321 | 103895446 |
| chr13 | 103991681 | 103991806 |
| chr13 | 104109061 | 104109256 |
| chr13 | 104146631 | 104146726 |
| chr13 | 104148181 | 104148366 |
| chr13 | 104171951 | 104172066 |
| chr13 | 104173321 | 104173436 |
| chr13 | 104180011 | 104180176 |
| chr13 | 104180811 | 104180886 |
| chr13 | 104215081 | 104215176 |
| chr13 | 104242281 | 104242476 |
| chr13 | 104242481 | 104242886 |
| chr13 | 104319411 | 104319536 |
| chr13 | 104368941 | 104369086 |
| chr13 | 104446531 | 104446806 |
| chr13 | 104447611 | 104447736 |
| chr13 | 104448431 | 104448576 |
| chr13 | 104449451 | 104449616 |
| chr13 | 104552411 | 104552536 |
| chr13 | 104611801 | 104611896 |
| chr13 | 104614171 | 104614306 |
| chr13 | 104763521 | 104763636 |
| chr13 | 104780831 | 104780966 |
| chr13 | 104781251 | 104781416 |
| chr13 | 104816001 | 104816196 |
| chr13 | 104816431 | 104816606 |
| chr13 | 104816631 | 104816796 |
| chr13 | 105157461 | 105157586 |
| chr13 | 105637211 | 105637356 |
| chr13 | 105637651 | 105637826 |

|       |           |           |
|-------|-----------|-----------|
| chr13 | 105638641 | 105638756 |
| chr13 | 105638841 | 105639006 |
| chr13 | 105698361 | 105698506 |
| chr13 | 105943031 | 105943196 |
| chr13 | 106363981 | 106364086 |
| chr13 | 106370081 | 106370256 |
| chr13 | 107865751 | 107865886 |
| chr13 | 107949841 | 107950046 |
| chr13 | 107953181 | 107953276 |
| chr13 | 108013701 | 108013816 |
| chr13 | 108328391 | 108328566 |
| chr13 | 108492221 | 108492476 |
| chr13 | 108492491 | 108492676 |
| chr13 | 108708851 | 108708976 |
| chr13 | 108739881 | 108740076 |
| chr13 | 108751811 | 108751976 |
| chr13 | 108780191 | 108780336 |
| chr13 | 108914621 | 108914746 |
| chr13 | 109030191 | 109030306 |
| chr13 | 109053541 | 109053636 |
| chr13 | 109137591 | 109137736 |
| chr13 | 109362021 | 109362166 |
| chr13 | 109389701 | 109389796 |
| chr13 | 109392611 | 109392716 |
| chr13 | 109940831 | 109940936 |
| chr13 | 110873371 | 110873486 |
| chr13 | 111035881 | 111036256 |
| chr13 | 111036501 | 111036676 |
| chr13 | 111037931 | 111038086 |
| chr13 | 111038301 | 111038586 |
| chr13 | 111047261 | 111047586 |
| chr13 | 111543541 | 111543676 |
| chr13 | 111579751 | 111579906 |
| chr13 | 111626231 | 111626356 |
| chr13 | 111683901 | 111684026 |
| chr13 | 111684941 | 111685136 |
| chr13 | 111722421 | 111722486 |
| chr13 | 111811781 | 111811956 |
| chr13 | 111919341 | 111919456 |
| chr13 | 112088151 | 112088256 |
| chr13 | 112135171 | 112135336 |
| chr13 | 112165241 | 112165426 |
| chr13 | 112171071 | 112171166 |
| chr13 | 112292861 | 112292996 |
| chr13 | 112615861 | 112615996 |
| chr13 | 112777401 | 112777536 |
| chr13 | 112868741 | 112868876 |
| chr13 | 112909461 | 112909596 |
| chr13 | 112925901 | 112926016 |
| chr13 | 112989351 | 112989596 |
| chr13 | 112990691 | 112991036 |
| chr13 | 113184801 | 113184956 |
| chr13 | 113209141 | 113209466 |

|       |           |           |
|-------|-----------|-----------|
| chr13 | 113240741 | 113240866 |
| chr13 | 113274121 | 113274276 |
| chr13 | 113335001 | 113335176 |
| chr13 | 113348911 | 113349026 |
| chr13 | 113373821 | 113373946 |
| chr13 | 113374051 | 113374346 |
| chr13 | 113375151 | 113375296 |
| chr13 | 113399541 | 113399666 |
| chr13 | 113975061 | 113975196 |
| chr13 | 114329671 | 114329836 |
| chr13 | 114587581 | 114587736 |
| chr13 | 114630561 | 114630666 |
| chr13 | 114713941 | 114714036 |
| chr13 | 114729411 | 114729726 |
| chr13 | 114937571 | 114937716 |
| chr13 | 115001331 | 115001466 |
| chr13 | 115001521 | 115001656 |
| chr13 | 115003411 | 115003646 |
| chr13 | 115007421 | 115007596 |
| chr13 | 115007861 | 115008196 |
| chr13 | 115009711 | 115009876 |
| chr13 | 115010251 | 115010446 |
| chr13 | 115013751 | 115013906 |
| chr13 | 115033161 | 115033296 |
| chr13 | 115050741 | 115050906 |
| chr13 | 115102151 | 115102306 |
| chr13 | 115102361 | 115102676 |
| chr13 | 115104671 | 115104876 |
| chr13 | 115173451 | 115173626 |
| chr13 | 115245941 | 115246106 |
| chr13 | 115277581 | 115277796 |
| chr13 | 115392581 | 115392676 |
| chr13 | 115392731 | 115392986 |
| chr13 | 115467371 | 115467486 |
| chr13 | 115517961 | 115518066 |
| chr13 | 115518361 | 115518506 |
| chr13 | 115801241 | 115801466 |
| chr13 | 115973781 | 115973976 |
| chr13 | 115999711 | 115999886 |
| chr13 | 116044391 | 116044546 |
| chr13 | 116113111 | 116113336 |
| chr13 | 116142361 | 116142536 |
| chr13 | 117264081 | 117264206 |
| chr13 | 117608441 | 117608586 |
| chr13 | 118003661 | 118003836 |
| chr13 | 118112281 | 118112436 |
| chr13 | 118112711 | 118112876 |
| chr13 | 118327471 | 118327596 |
| chr13 | 118354931 | 118355056 |
| chr13 | 119832331 | 119832436 |
| chr13 | 120513611 | 120513746 |
| chr12 | 3739411   | 3739496   |
| chr12 | 3843511   | 3843636   |

|       |          |          |
|-------|----------|----------|
| chr12 | 3850981  | 3851146  |
| chr12 | 4303131  | 4303286  |
| chr12 | 4612721  | 4612856  |
| chr12 | 4867341  | 4867466  |
| chr12 | 5034771  | 5034846  |
| chr12 | 5242501  | 5242596  |
| chr12 | 5276231  | 5276406  |
| chr12 | 5294101  | 5294226  |
| chr12 | 5296211  | 5296326  |
| chr12 | 5381341  | 5381506  |
| chr12 | 8390341  | 8390466  |
| chr12 | 8390521  | 8390676  |
| chr12 | 8581821  | 8581916  |
| chr12 | 8925281  | 8925436  |
| chr12 | 8938941  | 8939106  |
| chr12 | 9150641  | 9150796  |
| chr12 | 9200511  | 9200696  |
| chr12 | 9279591  | 9280036  |
| chr12 | 11344121 | 11344406 |
| chr12 | 11744131 | 11744236 |
| chr12 | 12377561 | 12377676 |
| chr12 | 12545111 | 12545246 |
| chr12 | 12567871 | 12568046 |
| chr12 | 12706681 | 12707026 |
| chr12 | 12719451 | 12719616 |
| chr12 | 12719861 | 12719996 |
| chr12 | 12720121 | 12720426 |
| chr12 | 12749321 | 12749416 |
| chr12 | 12749441 | 12749686 |
| chr12 | 12749921 | 12750026 |
| chr12 | 12750881 | 12751066 |
| chr12 | 12751081 | 12751266 |
| chr12 | 12772631 | 12772856 |
| chr12 | 12773231 | 12773356 |
| chr12 | 12836781 | 12836956 |
| chr12 | 13012961 | 13013126 |
| chr12 | 13019941 | 13020086 |
| chr12 | 13074351 | 13074606 |
| chr12 | 13093551 | 13093676 |
| chr12 | 13118391 | 13118556 |
| chr12 | 13120561 | 13120816 |
| chr12 | 13126861 | 13126966 |
| chr12 | 13127051 | 13127216 |
| chr12 | 13146591 | 13146686 |
| chr12 | 13148171 | 13148636 |
| chr12 | 13214331 | 13214456 |
| chr12 | 13233111 | 13233246 |
| chr12 | 13235191 | 13235336 |
| chr12 | 15678971 | 15679116 |
| chr12 | 15838771 | 15838926 |
| chr12 | 15876161 | 15876256 |
| chr12 | 16109921 | 16110076 |
| chr12 | 16117061 | 16117226 |

|       |          |          |
|-------|----------|----------|
| chr12 | 16164971 | 16165276 |
| chr12 | 16258411 | 16258646 |
| chr12 | 16286541 | 16286636 |
| chr12 | 16286731 | 16286806 |
| chr12 | 16757021 | 16757136 |
| chr12 | 16813931 | 16814116 |
| chr12 | 16829511 | 16829816 |
| chr12 | 16844201 | 16844386 |
| chr12 | 16861781 | 16861936 |
| chr12 | 16866461 | 16866676 |
| chr12 | 16891941 | 16892006 |
| chr12 | 16892131 | 16892226 |
| chr12 | 16909401 | 16909536 |
| chr12 | 17074511 | 17074676 |
| chr12 | 17236161 | 17236306 |
| chr12 | 17512791 | 17512886 |
| chr12 | 17647151 | 17647276 |
| chr12 | 17648231 | 17648366 |
| chr12 | 17648371 | 17648576 |
| chr12 | 21380871 | 21381176 |
| chr12 | 21671281 | 21671516 |
| chr12 | 21672751 | 21672926 |
| chr12 | 21673031 | 21673176 |
| chr12 | 21673181 | 21673406 |
| chr12 | 21710001 | 21710116 |
| chr12 | 21735091 | 21735206 |
| chr12 | 25483461 | 25483656 |
| chr12 | 25686471 | 25686686 |
| chr12 | 25686881 | 25687046 |
| chr12 | 25718551 | 25718696 |
| chr12 | 25721231 | 25721426 |
| chr12 | 25729291 | 25729476 |
| chr12 | 25752711 | 25752946 |
| chr12 | 26777541 | 26777656 |
| chr12 | 26777691 | 26777856 |
| chr12 | 26778111 | 26778336 |
| chr12 | 26886631 | 26886826 |
| chr12 | 27119981 | 27120126 |
| chr12 | 27320761 | 27320946 |
| chr12 | 27477451 | 27477546 |
| chr12 | 27667791 | 27667896 |
| chr12 | 27726181 | 27726356 |
| chr12 | 27729531 | 27729676 |
| chr12 | 28081301 | 28081416 |
| chr12 | 28152451 | 28152616 |
| chr12 | 28468111 | 28468296 |
| chr12 | 28533511 | 28533646 |
| chr12 | 28945371 | 28945476 |
| chr12 | 29290661 | 29291026 |
| chr12 | 29361601 | 29361736 |
| chr12 | 29435551 | 29435666 |
| chr12 | 29461811 | 29461946 |
| chr12 | 29471161 | 29471256 |



|       |          |          |
|-------|----------|----------|
| chr12 | 29478901 | 29479066 |
| chr12 | 29485281 | 29485406 |
| chr12 | 29535231 | 29535366 |
| chr12 | 29601721 | 29601986 |
| chr12 | 29635341 | 29635586 |
| chr12 | 29637141 | 29637256 |
| chr12 | 29648211 | 29648506 |
| chr12 | 29669751 | 29669916 |
| chr12 | 29726761 | 29726976 |
| chr12 | 29727261 | 29727526 |
| chr12 | 29825931 | 29826046 |
| chr12 | 29941141 | 29941246 |
| chr12 | 30114921 | 30115026 |
| chr12 | 30285211 | 30285526 |
| chr12 | 30287961 | 30288166 |
| chr12 | 30335331 | 30335446 |
| chr12 | 30375451 | 30375666 |
| chr12 | 30376021 | 30376136 |
| chr12 | 30395961 | 30396146 |
| chr12 | 30546931 | 30547056 |
| chr12 | 30687351 | 30687466 |
| chr12 | 30843211 | 30843356 |
| chr12 | 31737241 | 31737416 |
| chr12 | 31856921 | 31857196 |
| chr12 | 31857431 | 31857666 |
| chr12 | 31857981 | 31858076 |
| chr12 | 31858171 | 31858326 |
| chr12 | 31880831 | 31880926 |
| chr12 | 31881691 | 31881876 |
| chr12 | 31883641 | 31883786 |
| chr12 | 31958151 | 31958336 |
| chr12 | 32189451 | 32189696 |
| chr12 | 32713061 | 32713216 |
| chr12 | 32713271 | 32713376 |
| chr12 | 32718081 | 32718186 |
| chr12 | 32773241 | 32773356 |
| chr12 | 33748021 | 33748256 |
| chr12 | 33748281 | 33748376 |
| chr12 | 33782661 | 33782816 |
| chr12 | 33832221 | 33832346 |
| chr12 | 34174061 | 34174226 |
| chr12 | 34177941 | 34178096 |
| chr12 | 34178121 | 34178276 |
| chr12 | 34178321 | 34178566 |
| chr12 | 34302931 | 34303216 |
| chr12 | 34363951 | 34364066 |
| chr12 | 34566861 | 34567006 |
| chr12 | 34785391 | 34785536 |
| chr12 | 34806701 | 34806796 |
| chr12 | 34806841 | 34807076 |
| chr12 | 34807171 | 34807306 |
| chr12 | 34873941 | 34874096 |
| chr12 | 34897841 | 34897936 |

|       |          |          |
|-------|----------|----------|
| chr12 | 34918531 | 34918686 |
| chr12 | 35113601 | 35113836 |
| chr12 | 35222611 | 35222756 |
| chr12 | 35360671 | 35360816 |
| chr12 | 35380921 | 35381026 |
| chr12 | 35574591 | 35574656 |
| chr12 | 35760711 | 35760856 |
| chr12 | 35761371 | 35761496 |
| chr12 | 36101721 | 36101786 |
| chr12 | 36404731 | 36404826 |
| chr12 | 36512811 | 36512926 |
| chr12 | 36854491 | 36854626 |
| chr12 | 36895851 | 36896006 |
| chr12 | 36986831 | 36986946 |
| chr12 | 38399621 | 38399696 |
| chr12 | 38623071 | 38623196 |
| chr12 | 39106821 | 39107076 |
| chr12 | 39317361 | 39317506 |
| chr12 | 39322921 | 39323066 |
| chr12 | 39765301 | 39765436 |
| chr12 | 40251601 | 40251806 |
| chr12 | 40527571 | 40527756 |
| chr12 | 40982551 | 40982666 |
| chr12 | 40983851 | 40984016 |
| chr12 | 41023511 | 41023686 |
| chr12 | 41300431 | 41300726 |
| chr12 | 41304501 | 41304646 |
| chr12 | 41825661 | 41825816 |
| chr12 | 41993971 | 41994096 |
| chr12 | 42567121 | 42567256 |
| chr12 | 42901671 | 42901786 |
| chr12 | 45208701 | 45208856 |
| chr12 | 45256691 | 45256826 |
| chr12 | 45307451 | 45307556 |
| chr12 | 45308091 | 45308206 |
| chr12 | 45389761 | 45390026 |
| chr12 | 45399811 | 45399966 |
| chr12 | 45710541 | 45710716 |
| chr12 | 45730041 | 45730186 |
| chr12 | 45799331 | 45799496 |
| chr12 | 45940491 | 45940896 |
| chr12 | 45970311 | 45970476 |
| chr12 | 46003991 | 46004116 |
| chr12 | 46007941 | 46008096 |
| chr12 | 46265251 | 46265326 |
| chr12 | 46370331 | 46370446 |
| chr12 | 46464671 | 46464796 |
| chr12 | 46541621 | 46541786 |
| chr12 | 50996451 | 50996596 |
| chr12 | 50997141 | 50997316 |
| chr12 | 51228741 | 51228856 |
| chr12 | 51467621 | 51467716 |
| chr12 | 51922471 | 51922586 |

|       |          |          |
|-------|----------|----------|
| chr12 | 51924431 | 51924636 |
| chr12 | 51967661 | 51967806 |
| chr12 | 52765591 | 52765726 |
| chr12 | 52787421 | 52787556 |
| chr12 | 52793271 | 52793366 |
| chr12 | 53268501 | 53268636 |
| chr12 | 53289831 | 53289926 |
| chr12 | 53303071 | 53303276 |
| chr12 | 53303361 | 53303526 |
| chr12 | 53307471 | 53307896 |
| chr12 | 53334191 | 53334396 |
| chr12 | 53334801 | 53335146 |
| chr12 | 53356961 | 53357136 |
| chr12 | 53357461 | 53357586 |
| chr12 | 53395871 | 53396026 |
| chr12 | 53397701 | 53397826 |
| chr12 | 53550071 | 53550526 |
| chr12 | 53560131 | 53560256 |
| chr12 | 53593221 | 53593336 |
| chr12 | 53754861 | 53754966 |
| chr12 | 53846921 | 53847066 |
| chr12 | 53933991 | 53934136 |
| chr12 | 53954991 | 53955206 |
| chr12 | 53984661 | 53984846 |
| chr12 | 54185471 | 54185576 |
| chr12 | 54213801 | 54213926 |
| chr12 | 54214291 | 54214416 |
| chr12 | 54217511 | 54217726 |
| chr12 | 54220781 | 54220876 |
| chr12 | 54259911 | 54260236 |
| chr12 | 54369161 | 54369326 |
| chr12 | 54460241 | 54460366 |
| chr12 | 54545551 | 54545696 |
| chr12 | 54577351 | 54577466 |
| chr12 | 54585801 | 54586026 |
| chr12 | 54587021 | 54587146 |
| chr12 | 54660551 | 54660876 |
| chr12 | 54697461 | 54697626 |
| chr12 | 54759251 | 54759336 |
| chr12 | 54760291 | 54760426 |
| chr12 | 54837261 | 54837436 |
| chr12 | 54837881 | 54838046 |
| chr12 | 54845591 | 54845836 |
| chr12 | 54883761 | 54883926 |
| chr12 | 54964751 | 54964876 |
| chr12 | 54974501 | 54974676 |
| chr12 | 55106451 | 55106566 |
| chr12 | 55275541 | 55275706 |
| chr12 | 55415381 | 55415586 |
| chr12 | 55498961 | 55499136 |
| chr12 | 55565061 | 55565206 |
| chr12 | 55573551 | 55573706 |
| chr12 | 55621391 | 55621516 |

|       |          |          |
|-------|----------|----------|
| chr12 | 56457601 | 56457706 |
| chr12 | 56923511 | 56923646 |
| chr12 | 57157641 | 57157746 |
| chr12 | 57158351 | 57158686 |
| chr12 | 57170311 | 57170486 |
| chr12 | 57171191 | 57171356 |
| chr12 | 57176441 | 57176596 |
| chr12 | 57193701 | 57193886 |
| chr12 | 57220071 | 57220176 |
| chr12 | 57306791 | 57306956 |
| chr12 | 57358131 | 57358386 |
| chr12 | 57358611 | 57358766 |
| chr12 | 57377711 | 57377886 |
| chr12 | 57503761 | 57504016 |
| chr12 | 57638561 | 57638796 |
| chr12 | 57742411 | 57742556 |
| chr12 | 57746031 | 57746146 |
| chr12 | 57747571 | 57747696 |
| chr12 | 57813221 | 57813336 |
| chr12 | 57870271 | 57870426 |
| chr12 | 57876331 | 57876536 |
| chr12 | 57901241 | 57901426 |
| chr12 | 57906191 | 57906316 |
| chr12 | 57916341 | 57916436 |
| chr12 | 57927091 | 57927266 |
| chr12 | 57948771 | 57948946 |
| chr12 | 58002681 | 58002836 |
| chr12 | 58021641 | 58021826 |
| chr12 | 58036791 | 58036936 |
| chr12 | 58098321 | 58098416 |
| chr12 | 58210111 | 58210216 |
| chr12 | 58282121 | 58282246 |
| chr12 | 58300891 | 58301016 |
| chr12 | 58347521 | 58347686 |
| chr12 | 58355441 | 58355536 |
| chr12 | 58362531 | 58362656 |
| chr12 | 58362881 | 58363076 |
| chr12 | 58365131 | 58365236 |
| chr12 | 58414501 | 58414616 |
| chr12 | 58433901 | 58434106 |
| chr12 | 58448541 | 58448726 |
| chr12 | 58482041 | 58482186 |
| chr12 | 58633061 | 58633176 |
| chr12 | 58694821 | 58695016 |
| chr12 | 59722301 | 59722436 |
| chr12 | 59722681 | 59722896 |
| chr12 | 59722981 | 59723076 |
| chr12 | 64158461 | 64158586 |
| chr12 | 65534501 | 65534666 |
| chr12 | 65757361 | 65757516 |
| chr12 | 65894221 | 65894366 |
| chr12 | 69942401 | 69942536 |
| chr12 | 70218021 | 70218196 |

|       |          |          |
|-------|----------|----------|
| chr12 | 70336191 | 70336526 |
| chr12 | 70341221 | 70341326 |
| chr12 | 70350671 | 70350946 |
| chr12 | 70355891 | 70355996 |
| chr12 | 70361251 | 70361356 |
| chr12 | 70364681 | 70364846 |
| chr12 | 70380961 | 70381276 |
| chr12 | 70403401 | 70403666 |
| chr12 | 70456131 | 70456276 |
| chr12 | 70456401 | 70456566 |
| chr12 | 70599221 | 70599426 |
| chr12 | 70726311 | 70726516 |
| chr12 | 70737791 | 70737926 |
| chr12 | 70944361 | 70944496 |
| chr12 | 70987281 | 70987426 |
| chr12 | 71110981 | 71111286 |
| chr12 | 71273541 | 71273736 |
| chr12 | 71494411 | 71494546 |
| chr12 | 71541151 | 71541256 |
| chr12 | 71552471 | 71552676 |
| chr12 | 71552921 | 71553026 |
| chr12 | 71607981 | 71608136 |
| chr12 | 71671251 | 71671456 |
| chr12 | 71799721 | 71799846 |
| chr12 | 71799981 | 71800156 |
| chr12 | 72177271 | 72177466 |
| chr12 | 72254261 | 72254366 |
| chr12 | 72254551 | 72254746 |
| chr12 | 72255791 | 72255956 |
| chr12 | 72256291 | 72256426 |
| chr12 | 72258211 | 72258706 |
| chr12 | 72295151 | 72295666 |
| chr12 | 72295691 | 72295986 |
| chr12 | 72323891 | 72324036 |
| chr12 | 72352371 | 72352476 |
| chr12 | 72352491 | 72352736 |
| chr12 | 72353341 | 72353456 |
| chr12 | 72400071 | 72400136 |
| chr12 | 72417351 | 72417506 |
| chr12 | 72417701 | 72417846 |
| chr12 | 72422001 | 72422196 |
| chr12 | 72442661 | 72442936 |
| chr12 | 72462291 | 72462446 |
| chr12 | 72488271 | 72488586 |
| chr12 | 72497621 | 72497846 |
| chr12 | 72543221 | 72543466 |
| chr12 | 72643191 | 72643426 |
| chr12 | 72643911 | 72644066 |
| chr12 | 72732491 | 72732676 |
| chr12 | 72877961 | 72878146 |
| chr12 | 73046991 | 73047086 |
| chr12 | 73152371 | 73152476 |
| chr12 | 73217151 | 73217246 |

|       |          |          |
|-------|----------|----------|
| chr12 | 73243991 | 73244276 |
| chr12 | 73292721 | 73292956 |
| chr12 | 73401901 | 73402076 |
| chr12 | 73426111 | 73426266 |
| chr12 | 73437291 | 73437446 |
| chr12 | 73438311 | 73438426 |
| chr12 | 73675251 | 73675336 |
| chr12 | 73773281 | 73773566 |
| chr12 | 73774821 | 73774956 |
| chr12 | 74259641 | 74259906 |
| chr12 | 74323081 | 74323226 |
| chr12 | 74323531 | 74323626 |
| chr12 | 74391341 | 74391486 |
| chr12 | 74440431 | 74440586 |
| chr12 | 74448291 | 74448476 |
| chr12 | 74500201 | 74500396 |
| chr12 | 74526931 | 74527146 |
| chr12 | 74651181 | 74651256 |
| chr12 | 74660261 | 74660366 |
| chr12 | 75188251 | 75188426 |
| chr12 | 76342841 | 76342926 |
| chr12 | 76772891 | 76772966 |
| chr12 | 76841891 | 76842026 |
| chr12 | 77226911 | 77227066 |
| chr12 | 77237951 | 77238116 |
| chr12 | 77455091 | 77455236 |
| chr12 | 77471381 | 77471496 |
| chr12 | 77564491 | 77564676 |
| chr12 | 77732591 | 77732746 |
| chr12 | 77800121 | 77800246 |
| chr12 | 77802811 | 77802956 |
| chr12 | 78459541 | 78459676 |
| chr12 | 78491871 | 78492006 |
| chr12 | 78517291 | 78517376 |
| chr12 | 78609011 | 78609166 |
| chr12 | 78623161 | 78623246 |
| chr12 | 78646811 | 78646946 |
| chr12 | 78661171 | 78661296 |
| chr12 | 78766061 | 78766176 |
| chr12 | 78773601 | 78773926 |
| chr12 | 78774621 | 78774756 |
| chr12 | 78778641 | 78778816 |
| chr12 | 78868641 | 78868806 |
| chr12 | 78994851 | 78995096 |
| chr12 | 78996291 | 78996366 |
| chr12 | 79048961 | 79049186 |
| chr12 | 80154561 | 80154716 |
| chr12 | 80154771 | 80154946 |
| chr12 | 80236381 | 80236476 |
| chr12 | 80260631 | 80260846 |
| chr12 | 80260901 | 80260996 |
| chr12 | 80271781 | 80271936 |
| chr12 | 80285201 | 80285326 |

|       |          |          |
|-------|----------|----------|
| chr12 | 80288181 | 80288296 |
| chr12 | 80300061 | 80300166 |
| chr12 | 80374491 | 80374636 |
| chr12 | 80420811 | 80421036 |
| chr12 | 80426441 | 80426596 |
| chr12 | 80444941 | 80445106 |
| chr12 | 80517471 | 80517626 |
| chr12 | 80560901 | 80561066 |
| chr12 | 80575451 | 80575556 |
| chr12 | 80582061 | 80582226 |
| chr12 | 80582491 | 80582596 |
| chr12 | 80627251 | 80627346 |
| chr12 | 80665241 | 80665416 |
| chr12 | 80669721 | 80669846 |
| chr12 | 80684871 | 80685056 |
| chr12 | 80731451 | 80731596 |
| chr12 | 80731751 | 80732056 |
| chr12 | 80732171 | 80732456 |
| chr12 | 80732901 | 80733076 |
| chr12 | 80733231 | 80733476 |
| chr12 | 80733521 | 80733636 |
| chr12 | 80744821 | 80744956 |
| chr12 | 80745031 | 80745236 |
| chr12 | 80767521 | 80767646 |
| chr12 | 80798151 | 80798386 |
| chr12 | 80798671 | 80798916 |
| chr12 | 80800061 | 80800186 |
| chr12 | 80817571 | 80817716 |
| chr12 | 80829911 | 80830016 |
| chr12 | 80830021 | 80830206 |
| chr12 | 80847271 | 80847396 |
| chr12 | 80852981 | 80853176 |
| chr12 | 80863861 | 80864026 |
| chr12 | 80864161 | 80864586 |
| chr12 | 80885771 | 80885916 |
| chr12 | 80902161 | 80902276 |
| chr12 | 80902751 | 80903206 |
| chr12 | 80905451 | 80905636 |
| chr12 | 81003651 | 81003826 |
| chr12 | 81010061 | 81010196 |
| chr12 | 81064291 | 81064406 |
| chr12 | 81064451 | 81064596 |
| chr12 | 81065781 | 81065906 |
| chr12 | 81065951 | 81066096 |
| chr12 | 81129801 | 81129916 |
| chr12 | 81142911 | 81143006 |
| chr12 | 81481511 | 81481626 |
| chr12 | 81517111 | 81517346 |
| chr12 | 81531151 | 81531256 |
| chr12 | 81791891 | 81792006 |
| chr12 | 82013991 | 82014136 |
| chr12 | 82027391 | 82027616 |
| chr12 | 82027661 | 82027806 |

|       |          |          |
|-------|----------|----------|
| chr12 | 82085191 | 82085256 |
| chr12 | 82605451 | 82605556 |
| chr12 | 82725751 | 82725896 |
| chr12 | 82831261 | 82831396 |
| chr12 | 83012291 | 83012426 |
| chr12 | 83041511 | 83041656 |
| chr12 | 83041841 | 83042096 |
| chr12 | 83066081 | 83066166 |
| chr12 | 83108291 | 83108466 |
| chr12 | 83316281 | 83316436 |
| chr12 | 83507781 | 83507966 |
| chr12 | 83508271 | 83508446 |
| chr12 | 83957291 | 83957406 |
| chr12 | 83963581 | 83963776 |
| chr12 | 84152301 | 84152506 |
| chr12 | 84152631 | 84152766 |
| chr12 | 84188671 | 84188806 |
| chr12 | 84213961 | 84214126 |
| chr12 | 84214271 | 84214406 |
| chr12 | 84317161 | 84317476 |
| chr12 | 84317781 | 84317886 |
| chr12 | 85032121 | 85032336 |
| chr12 | 85050851 | 85051056 |
| chr12 | 85055331 | 85055516 |
| chr12 | 85101421 | 85101556 |
| chr12 | 85107461 | 85107556 |
| chr12 | 85245121 | 85245246 |
| chr12 | 85372951 | 85373346 |
| chr12 | 85381791 | 85381986 |
| chr12 | 85414021 | 85414176 |
| chr12 | 85421331 | 85421496 |
| chr12 | 85422141 | 85422276 |
| chr12 | 85425271 | 85425386 |
| chr12 | 85540481 | 85540586 |
| chr12 | 85617001 | 85617156 |
| chr12 | 85920411 | 85920636 |
| chr12 | 85939981 | 85940146 |
| chr12 | 85940691 | 85941026 |
| chr12 | 86071481 | 86071616 |
| chr12 | 86341391 | 86341596 |
| chr12 | 86346291 | 86346486 |
| chr12 | 86346531 | 86346626 |
| chr12 | 86456261 | 86456426 |
| chr12 | 86470461 | 86470726 |
| chr12 | 86615901 | 86616016 |
| chr12 | 86674181 | 86674376 |
| chr12 | 86699001 | 86699116 |
| chr12 | 86711371 | 86711486 |
| chr12 | 86876181 | 86876356 |
| chr12 | 87041121 | 87041256 |
| chr12 | 87041261 | 87041406 |
| chr12 | 87092471 | 87092736 |
| chr12 | 87144211 | 87144326 |



|       |          |          |
|-------|----------|----------|
| chr12 | 87150661 | 87150846 |
| chr12 | 87169241 | 87169436 |
| chr12 | 87173031 | 87173176 |
| chr12 | 87213621 | 87213786 |
| chr12 | 87249971 | 87250286 |
| chr12 | 87250541 | 87250696 |
| chr12 | 87256671 | 87256926 |
| chr12 | 87268831 | 87268916 |
| chr12 | 87269051 | 87269146 |
| chr12 | 87269171 | 87269276 |
| chr12 | 87277821 | 87278236 |
| chr12 | 87278281 | 87278406 |
| chr12 | 87398861 | 87399046 |
| chr12 | 87399091 | 87399346 |
| chr12 | 87534141 | 87534256 |
| chr12 | 87536401 | 87536566 |
| chr12 | 87801871 | 87802126 |
| chr12 | 87808601 | 87808706 |
| chr12 | 87866941 | 87867376 |
| chr12 | 88130351 | 88130466 |
| chr12 | 88922711 | 88922846 |
| chr12 | 89298121 | 89298286 |
| chr12 | 89496381 | 89496516 |
| chr12 | 89497921 | 89498326 |
| chr12 | 89698421 | 89698726 |
| chr12 | 89773071 | 89773156 |
| chr12 | 90052311 | 90052426 |
| chr12 | 90165021 | 90165106 |
| chr12 | 90259091 | 90259336 |
| chr12 | 90391661 | 90391826 |
| chr12 | 91988301 | 91988406 |
| chr12 | 92013561 | 92013766 |
| chr12 | 92020151 | 92020286 |
| chr12 | 92047231 | 92047416 |
| chr12 | 92048211 | 92048356 |
| chr12 | 92048931 | 92049156 |
| chr12 | 92089291 | 92089536 |
| chr12 | 92168381 | 92168526 |
| chr12 | 92171111 | 92171236 |
| chr12 | 92171311 | 92171416 |
| chr12 | 92171471 | 92171626 |
| chr12 | 92171901 | 92172166 |
| chr12 | 92284531 | 92284706 |
| chr12 | 92335691 | 92335896 |
| chr12 | 92388151 | 92388276 |
| chr12 | 92466301 | 92466416 |
| chr12 | 92698471 | 92698586 |
| chr12 | 95862881 | 95862986 |
| chr12 | 95873271 | 95873426 |
| chr12 | 98290331 | 98290476 |
| chr12 | 98322481 | 98322726 |
| chr12 | 98432501 | 98432646 |
| chr12 | 98433081 | 98433276 |

|       |           |           |
|-------|-----------|-----------|
| chr12 | 98451021  | 98451236  |
| chr12 | 98671381  | 98671536  |
| chr12 | 98671611  | 98671736  |
| chr12 | 98705961  | 98706056  |
| chr12 | 98926141  | 98926316  |
| chr12 | 99003331  | 99003426  |
| chr12 | 99096491  | 99096626  |
| chr12 | 99114901  | 99115146  |
| chr12 | 99115781  | 99115956  |
| chr12 | 99126231  | 99126406  |
| chr12 | 99359881  | 99360066  |
| chr12 | 99375281  | 99375576  |
| chr12 | 99412721  | 99412846  |
| chr12 | 99440591  | 99440816  |
| chr12 | 99517621  | 99517776  |
| chr12 | 99621561  | 99621736  |
| chr12 | 99631441  | 99631716  |
| chr12 | 99659891  | 99660086  |
| chr12 | 99702571  | 99702686  |
| chr12 | 99807471  | 99807616  |
| chr12 | 99845291  | 99845456  |
| chr12 | 99845601  | 99845906  |
| chr12 | 99899331  | 99899676  |
| chr12 | 99911851  | 99912106  |
| chr12 | 99931331  | 99931476  |
| chr12 | 100042011 | 100042166 |
| chr12 | 100158581 | 100158676 |
| chr12 | 100324401 | 100324526 |
| chr12 | 100361141 | 100361336 |
| chr12 | 100445461 | 100445556 |
| chr12 | 100485251 | 100485396 |
| chr12 | 100499401 | 100499596 |
| chr12 | 100577481 | 100577626 |
| chr12 | 100577651 | 100577766 |
| chr12 | 100827671 | 100827926 |
| chr12 | 100930251 | 100930406 |
| chr12 | 100935681 | 100935826 |
| chr12 | 100935871 | 100935986 |
| chr12 | 100940481 | 100940656 |
| chr12 | 101248581 | 101248816 |
| chr12 | 101391381 | 101391726 |
| chr12 | 101399401 | 101399556 |
| chr12 | 101419921 | 101420076 |
| chr12 | 101424711 | 101424846 |
| chr12 | 101428181 | 101428336 |
| chr12 | 101428731 | 101428896 |
| chr12 | 102682321 | 102682466 |
| chr12 | 102922771 | 102923156 |
| chr12 | 102997721 | 102997846 |
| chr12 | 102999101 | 102999246 |
| chr12 | 103019751 | 103019886 |
| chr12 | 103035451 | 103035656 |
| chr12 | 103041911 | 103042026 |

|       |           |           |
|-------|-----------|-----------|
| chr12 | 103048971 | 103049216 |
| chr12 | 103077291 | 103077446 |
| chr12 | 103077681 | 103077846 |
| chr12 | 103088311 | 103088456 |
| chr12 | 103096611 | 103096716 |
| chr12 | 103130861 | 103131016 |
| chr12 | 103131041 | 103131276 |
| chr12 | 103131371 | 103131616 |
| chr12 | 103131841 | 103131996 |
| chr12 | 103132391 | 103132706 |
| chr12 | 103132831 | 103132986 |
| chr12 | 103363661 | 103363796 |
| chr12 | 103371781 | 103371926 |
| chr12 | 103372091 | 103372276 |
| chr12 | 103516251 | 103516406 |
| chr12 | 103518671 | 103518826 |
| chr12 | 103604191 | 103604316 |
| chr12 | 103633351 | 103633466 |
| chr12 | 103640371 | 103640516 |
| chr12 | 103682961 | 103683096 |
| chr12 | 103692681 | 103692816 |
| chr12 | 103792981 | 103793126 |
| chr12 | 104969111 | 104969236 |
| chr12 | 105079561 | 105079696 |
| chr12 | 105280591 | 105280836 |
| chr12 | 105309021 | 105309366 |
| chr12 | 105420391 | 105420576 |
| chr12 | 105625861 | 105625986 |
| chr12 | 105740561 | 105740856 |
| chr12 | 105759871 | 105760026 |
| chr12 | 105957271 | 105957466 |
| chr12 | 106122981 | 106123096 |
| chr12 | 106472071 | 106472166 |
| chr12 | 106482011 | 106482346 |
| chr12 | 106574021 | 106574286 |
| chr12 | 106579211 | 106579276 |
| chr12 | 106606311 | 106606446 |
| chr12 | 106643291 | 106643426 |
| chr12 | 106848431 | 106848626 |
| chr12 | 106869201 | 106869426 |
| chr12 | 106869441 | 106869666 |
| chr12 | 106875831 | 106875966 |
| chr12 | 106877101 | 106877236 |
| chr12 | 106916371 | 106916486 |
| chr12 | 106919601 | 106919866 |
| chr12 | 106998881 | 106999196 |
| chr12 | 107074261 | 107074556 |
| chr12 | 107085631 | 107085746 |
| chr12 | 107088001 | 107088186 |
| chr12 | 107089061 | 107089166 |
| chr12 | 107089171 | 107089336 |
| chr12 | 107107541 | 107107686 |
| chr12 | 107762331 | 107762446 |

|       |           |           |
|-------|-----------|-----------|
| chr12 | 107783801 | 107783916 |
| chr12 | 107818531 | 107818686 |
| chr12 | 108259231 | 108259396 |
| chr12 | 108438221 | 108438376 |
| chr12 | 108438751 | 108438856 |
| chr12 | 108445851 | 108445996 |
| chr12 | 108485441 | 108485616 |
| chr12 | 108567071 | 108567316 |
| chr12 | 108567821 | 108567956 |
| chr12 | 108660001 | 108660126 |
| chr12 | 108688681 | 108689056 |
| chr12 | 108689151 | 108689276 |
| chr12 | 108821561 | 108821696 |
| chr12 | 108851841 | 108851936 |
| chr12 | 108858531 | 108858716 |
| chr12 | 108879471 | 108879566 |
| chr12 | 108884071 | 108884226 |
| chr12 | 108901371 | 108901546 |
| chr12 | 108982821 | 108982926 |
| chr12 | 108994631 | 108994746 |
| chr12 | 109354281 | 109354586 |
| chr12 | 109842371 | 109842506 |
| chr12 | 109851551 | 109851846 |
| chr12 | 109851951 | 109852096 |
| chr12 | 109855311 | 109855636 |
| chr12 | 109865481 | 109865866 |
| chr12 | 109872531 | 109873116 |
| chr12 | 109948951 | 109949046 |
| chr12 | 109957341 | 109957586 |
| chr12 | 110054141 | 110054286 |
| chr12 | 110065051 | 110065186 |
| chr12 | 110176411 | 110176536 |
| chr12 | 110195631 | 110195796 |
| chr12 | 110197571 | 110197856 |
| chr12 | 110213861 | 110213986 |
| chr12 | 110284291 | 110284426 |
| chr12 | 110385811 | 110385976 |
| chr12 | 110655441 | 110655586 |
| chr12 | 110822961 | 110823216 |
| chr12 | 110946411 | 110946516 |
| chr12 | 111126571 | 111126666 |
| chr12 | 111154211 | 111154456 |
| chr12 | 111154491 | 111154766 |
| chr12 | 111154851 | 111155006 |
| chr12 | 111163851 | 111164136 |
| chr12 | 111524481 | 111524616 |
| chr12 | 111572801 | 111572896 |
| chr12 | 111794791 | 111795056 |
| chr12 | 111903891 | 111904046 |
| chr12 | 111937451 | 111937576 |
| chr12 | 112112961 | 112113116 |
| chr12 | 112205411 | 112205506 |
| chr12 | 112264841 | 112264976 |

|       |           |           |
|-------|-----------|-----------|
| chr12 | 112265001 | 112265156 |
| chr12 | 112611831 | 112612136 |
| chr12 | 112639341 | 112639486 |
| chr12 | 112662371 | 112662506 |
| chr12 | 112669271 | 112669466 |
| chr12 | 112669741 | 112670066 |
| chr12 | 112670091 | 112670366 |
| chr12 | 112725301 | 112725646 |
| chr12 | 112725661 | 112725806 |
| chr12 | 112749781 | 112749946 |
| chr12 | 112771671 | 112772016 |
| chr12 | 112797831 | 112798066 |
| chr12 | 112866491 | 112866636 |
| chr12 | 112920041 | 112920446 |
| chr12 | 112993551 | 112993666 |
| chr12 | 113166721 | 113166896 |
| chr12 | 113317621 | 113317906 |
| chr12 | 113704771 | 113704906 |
| chr12 | 117006521 | 117006666 |
| chr12 | 117361781 | 117361906 |
| chr12 | 117495981 | 117496146 |
| chr12 | 117549161 | 117549466 |
| chr12 | 117549521 | 117549666 |
| chr12 | 117602851 | 117602996 |
| chr12 | 117615201 | 117615336 |
| chr12 | 117618471 | 117618726 |
| chr12 | 117900341 | 117900496 |
| chr12 | 117900591 | 117900776 |
| chr12 | 118034751 | 118034926 |
| chr12 | 118070821 | 118070996 |
| chr12 | 118100951 | 118101046 |
| chr12 | 118102151 | 118102266 |
| chr12 | 118114351 | 118114586 |
| chr12 | 118179751 | 118179936 |
| chr12 | 118183121 | 118183256 |
| chr12 | 118186661 | 118186836 |
| chr12 | 118186991 | 118187126 |
| chr12 | 118193541 | 118193646 |
| chr12 | 118193691 | 118194066 |
| chr12 | 118247931 | 118248286 |
| chr12 | 118249751 | 118249896 |
| chr12 | 118274411 | 118274596 |
| chr12 | 118277451 | 118277656 |
| chr12 | 118293821 | 118294186 |
| chr12 | 118299141 | 118299396 |
| chr12 | 118358561 | 118358696 |
| chr12 | 118359911 | 118360076 |
| chr12 | 118955111 | 118955306 |
| chr12 | 118973531 | 118973696 |
| chr12 | 119064001 | 119064076 |
| chr12 | 119105921 | 119106086 |
| chr12 | 119147511 | 119147666 |
| chr12 | 119147991 | 119148236 |

|       |           |           |
|-------|-----------|-----------|
| chr12 | 119203031 | 119203156 |
| chr12 | 119274071 | 119274196 |
| chr11 | 3235021   | 3235216   |
| chr11 | 3274041   | 3274446   |
| chr11 | 3274461   | 3274596   |
| chr11 | 3296561   | 3296766   |
| chr11 | 4196701   | 4196836   |
| chr11 | 4199501   | 4199676   |
| chr11 | 4303341   | 4303496   |
| chr11 | 4304551   | 4304706   |
| chr11 | 4445481   | 4445656   |
| chr11 | 4502871   | 4502966   |
| chr11 | 4504511   | 4504756   |
| chr11 | 4522431   | 4522616   |
| chr11 | 4610101   | 4610206   |
| chr11 | 4637381   | 4637616   |
| chr11 | 4657571   | 4657796   |
| chr11 | 4663311   | 4663576   |
| chr11 | 4703101   | 4703196   |
| chr11 | 4706171   | 4706386   |
| chr11 | 4782931   | 4783136   |
| chr11 | 4898411   | 4898596   |
| chr11 | 4954891   | 4955016   |
| chr11 | 5019771   | 5019906   |
| chr11 | 5029141   | 5029286   |
| chr11 | 5029441   | 5029596   |
| chr11 | 5039521   | 5039596   |
| chr11 | 5142211   | 5142306   |
| chr11 | 5352001   | 5352196   |
| chr11 | 5354831   | 5354986   |
| chr11 | 5433241   | 5433396   |
| chr11 | 5461851   | 5461976   |
| chr11 | 5762731   | 5763056   |
| chr11 | 5789281   | 5789436   |
| chr11 | 5792161   | 5792596   |
| chr11 | 5792661   | 5792726   |
| chr11 | 5807211   | 5807366   |
| chr11 | 5809611   | 5809716   |
| chr11 | 5842851   | 5842956   |
| chr11 | 5900691   | 5900816   |
| chr11 | 6673971   | 6674116   |
| chr11 | 6678631   | 6678736   |
| chr11 | 6800521   | 6800646   |
| chr11 | 6801051   | 6801206   |
| chr11 | 6890641   | 6890886   |
| chr11 | 7086031   | 7086256   |
| chr11 | 7111441   | 7111606   |
| chr11 | 7184971   | 7185106   |
| chr11 | 7966421   | 7966556   |
| chr11 | 7969201   | 7969266   |
| chr11 | 8468991   | 8469116   |
| chr11 | 8485811   | 8485936   |
| chr11 | 8534901   | 8535036   |

|       |          |          |
|-------|----------|----------|
| chr11 | 8553891  | 8554146  |
| chr11 | 8559151  | 8559256  |
| chr11 | 8590421  | 8590636  |
| chr11 | 8592751  | 8592956  |
| chr11 | 8627861  | 8628016  |
| chr11 | 8681591  | 8681716  |
| chr11 | 8695521  | 8695726  |
| chr11 | 8870541  | 8870856  |
| chr11 | 11648351 | 11648576 |
| chr11 | 11711231 | 11711386 |
| chr11 | 11724561 | 11724706 |
| chr11 | 11730931 | 11731336 |
| chr11 | 11733221 | 11733506 |
| chr11 | 11735431 | 11735696 |
| chr11 | 11736881 | 11737196 |
| chr11 | 11744601 | 11744826 |
| chr11 | 11752241 | 11752396 |
| chr11 | 11755461 | 11755566 |
| chr11 | 11778001 | 11778126 |
| chr11 | 11784981 | 11785216 |
| chr11 | 11824091 | 11824266 |
| chr11 | 11831971 | 11832066 |
| chr11 | 12596381 | 12596536 |
| chr11 | 12712551 | 12712666 |
| chr11 | 12774841 | 12774916 |
| chr11 | 13878351 | 13878496 |
| chr11 | 16491491 | 16491646 |
| chr11 | 16676161 | 16676306 |
| chr11 | 17252891 | 17253046 |
| chr11 | 17422831 | 17422996 |
| chr11 | 17425021 | 17425166 |
| chr11 | 17914871 | 17915026 |
| chr11 | 18052521 | 18052666 |
| chr11 | 18052691 | 18052836 |
| chr11 | 18149411 | 18149566 |
| chr11 | 18257381 | 18257556 |
| chr11 | 18308331 | 18308606 |
| chr11 | 18308641 | 18308716 |
| chr11 | 18344621 | 18344716 |
| chr11 | 18390431 | 18390596 |
| chr11 | 18485121 | 18485256 |
| chr11 | 18647611 | 18647706 |
| chr11 | 18649261 | 18649436 |
| chr11 | 18649631 | 18649756 |
| chr11 | 18650901 | 18651066 |
| chr11 | 18651371 | 18651686 |
| chr11 | 18654081 | 18654256 |
| chr11 | 18654741 | 18654906 |
| chr11 | 18658501 | 18658706 |
| chr11 | 18755721 | 18755786 |
| chr11 | 18768031 | 18768146 |
| chr11 | 18781701 | 18781916 |
| chr11 | 18785541 | 18785616 |

|       |          |          |
|-------|----------|----------|
| chr11 | 18785671 | 18785846 |
| chr11 | 18795331 | 18795526 |
| chr11 | 18818131 | 18818236 |
| chr11 | 18827911 | 18828056 |
| chr11 | 18830671 | 18830806 |
| chr11 | 18830931 | 18831036 |
| chr11 | 18831071 | 18831336 |
| chr11 | 18835301 | 18835496 |
| chr11 | 18842741 | 18842836 |
| chr11 | 18845041 | 18845146 |
| chr11 | 18849131 | 18849366 |
| chr11 | 18857211 | 18857346 |
| chr11 | 18863861 | 18863956 |
| chr11 | 18879461 | 18879616 |
| chr11 | 18880491 | 18880706 |
| chr11 | 18881451 | 18881656 |
| chr11 | 18883341 | 18883536 |
| chr11 | 18909071 | 18909286 |
| chr11 | 18949971 | 18950056 |
| chr11 | 18952621 | 18953036 |
| chr11 | 18953941 | 18954086 |
| chr11 | 18993621 | 18993786 |
| chr11 | 19011881 | 19012086 |
| chr11 | 19031791 | 19031896 |
| chr11 | 19093031 | 19093156 |
| chr11 | 19247591 | 19247776 |
| chr11 | 19247811 | 19247936 |
| chr11 | 19250701 | 19251006 |
| chr11 | 19251121 | 19251216 |
| chr11 | 19265171 | 19265296 |
| chr11 | 19328491 | 19328616 |
| chr11 | 19375491 | 19375736 |
| chr11 | 19431161 | 19431956 |
| chr11 | 19454661 | 19454756 |
| chr11 | 19482751 | 19482896 |
| chr11 | 19609641 | 19609746 |
| chr11 | 19637241 | 19637366 |
| chr11 | 19637511 | 19637756 |
| chr11 | 19683011 | 19683166 |
| chr11 | 19836791 | 19836946 |
| chr11 | 19853081 | 19853236 |
| chr11 | 19887421 | 19887556 |
| chr11 | 19887631 | 19888006 |
| chr11 | 19891421 | 19891576 |
| chr11 | 20036591 | 20036756 |
| chr11 | 20105211 | 20105346 |
| chr11 | 20355991 | 20356166 |
| chr11 | 20356291 | 20356596 |
| chr11 | 20503561 | 20503686 |
| chr11 | 20535781 | 20535866 |
| chr11 | 20539761 | 20539856 |
| chr11 | 20542791 | 20542936 |
| chr11 | 20543321 | 20543466 |



|       |          |          |
|-------|----------|----------|
| chr11 | 20550221 | 20550316 |
| chr11 | 20671941 | 20672106 |
| chr11 | 21064431 | 21064626 |
| chr11 | 21248811 | 21248916 |
| chr11 | 21977331 | 21977426 |
| chr11 | 21981031 | 21981096 |
| chr11 | 22036221 | 22036346 |
| chr11 | 23212551 | 23212666 |
| chr11 | 23991691 | 23991816 |
| chr11 | 23995401 | 23995556 |
| chr11 | 24004341 | 24004656 |
| chr11 | 24053061 | 24053376 |
| chr11 | 24058191 | 24058366 |
| chr11 | 24072961 | 24073106 |
| chr11 | 24080231 | 24080396 |
| chr11 | 24102621 | 24102846 |
| chr11 | 24186421 | 24186586 |
| chr11 | 24195911 | 24196146 |
| chr11 | 24196521 | 24196706 |
| chr11 | 24270491 | 24270766 |
| chr11 | 24403191 | 24403286 |
| chr11 | 24586031 | 24586396 |
| chr11 | 24639731 | 24639896 |
| chr11 | 24639921 | 24640186 |
| chr11 | 24729561 | 24729716 |
| chr11 | 24882991 | 24883106 |
| chr11 | 24957141 | 24957396 |
| chr11 | 25170331 | 25170456 |
| chr11 | 25545841 | 25545976 |
| chr11 | 25568071 | 25568216 |
| chr11 | 25713611 | 25713746 |
| chr11 | 25754261 | 25754466 |
| chr11 | 25756641 | 25757066 |
| chr11 | 26021681 | 26021856 |
| chr11 | 26030991 | 26031196 |
| chr11 | 27134621 | 27134756 |
| chr11 | 28751791 | 28751936 |
| chr11 | 30156561 | 30156786 |
| chr11 | 30692771 | 30692916 |
| chr11 | 31373201 | 31373316 |
| chr11 | 31709561 | 31709776 |
| chr11 | 31900501 | 31900716 |
| chr11 | 31901491 | 31901706 |
| chr11 | 31901711 | 31901906 |
| chr11 | 31902581 | 31902956 |
| chr11 | 31910001 | 31910146 |
| chr11 | 31964041 | 31964186 |
| chr11 | 32001681 | 32001896 |
| chr11 | 32002501 | 32002666 |
| chr11 | 32057771 | 32057946 |
| chr11 | 32066481 | 32066646 |
| chr11 | 32245221 | 32245386 |
| chr11 | 32245711 | 32245856 |

|       |          |          |
|-------|----------|----------|
| chr11 | 32436941 | 32437076 |
| chr11 | 32437261 | 32437396 |
| chr11 | 32564191 | 32564336 |
| chr11 | 32734471 | 32734836 |
| chr11 | 32735001 | 32735176 |
| chr11 | 33201081 | 33201266 |
| chr11 | 33232061 | 33232286 |
| chr11 | 33269601 | 33269746 |
| chr11 | 33429481 | 33429826 |
| chr11 | 33656861 | 33657056 |
| chr11 | 33657451 | 33657606 |
| chr11 | 33679781 | 33679906 |
| chr11 | 33679961 | 33680056 |
| chr11 | 33874741 | 33874856 |
| chr11 | 33874861 | 33874956 |
| chr11 | 34069731 | 34069856 |
| chr11 | 34153191 | 34153306 |
| chr11 | 34255491 | 34255596 |
| chr11 | 34306461 | 34306666 |
| chr11 | 34395041 | 34395156 |
| chr11 | 34689421 | 34689536 |
| chr11 | 34747761 | 34747936 |
| chr11 | 34868051 | 34868216 |
| chr11 | 34868231 | 34868366 |
| chr11 | 34967491 | 34967616 |
| chr11 | 34994931 | 34995136 |
| chr11 | 35047251 | 35047396 |
| chr11 | 35047721 | 35047916 |
| chr11 | 35105921 | 35106116 |
| chr11 | 35116641 | 35116776 |
| chr11 | 35116921 | 35117186 |
| chr11 | 35138151 | 35138276 |
| chr11 | 35190531 | 35190676 |
| chr11 | 35303041 | 35303186 |
| chr11 | 35312591 | 35312686 |
| chr11 | 35312761 | 35312976 |
| chr11 | 35387701 | 35387866 |
| chr11 | 35685671 | 35685806 |
| chr11 | 35708371 | 35708496 |
| chr11 | 35721131 | 35721296 |
| chr11 | 35767591 | 35767716 |
| chr11 | 35821891 | 35822016 |
| chr11 | 35852761 | 35852906 |
| chr11 | 35852951 | 35853156 |
| chr11 | 35871851 | 35871946 |
| chr11 | 35875591 | 35875716 |
| chr11 | 35884881 | 35885036 |
| chr11 | 35892971 | 35893116 |
| chr11 | 35924961 | 35925096 |
| chr11 | 35978151 | 35978386 |
| chr11 | 36016731 | 36016976 |
| chr11 | 36136541 | 36136706 |
| chr11 | 36164391 | 36164526 |

|       |          |          |
|-------|----------|----------|
| chr11 | 36164721 | 36164866 |
| chr11 | 36175781 | 36176046 |
| chr11 | 36415171 | 36415326 |
| chr11 | 36517661 | 36517936 |
| chr11 | 36540741 | 36540956 |
| chr11 | 36568931 | 36569016 |
| chr11 | 36590081 | 36590196 |
| chr11 | 36730961 | 36731086 |
| chr11 | 36878191 | 36878336 |
| chr11 | 36940571 | 36940706 |
| chr11 | 36965541 | 36965646 |
| chr11 | 37341511 | 37341686 |
| chr11 | 37726321 | 37726416 |
| chr11 | 39637601 | 39637776 |
| chr11 | 39638341 | 39638476 |
| chr11 | 39904291 | 39904396 |
| chr11 | 39981311 | 39981426 |
| chr11 | 40238431 | 40238626 |
| chr11 | 40246741 | 40246866 |
| chr11 | 40383101 | 40383206 |
| chr11 | 40383261 | 40383576 |
| chr11 | 40416441 | 40416666 |
| chr11 | 41103601 | 41103706 |
| chr11 | 43188221 | 43188366 |
| chr11 | 43391851 | 43392006 |
| chr11 | 43397481 | 43397666 |
| chr11 | 43565231 | 43565386 |
| chr11 | 44431731 | 44432116 |
| chr11 | 44469611 | 44469726 |
| chr11 | 44471901 | 44472006 |
| chr11 | 44501361 | 44501486 |
| chr11 | 44526281 | 44526396 |
| chr11 | 44526471 | 44526796 |
| chr11 | 44528021 | 44528166 |
| chr11 | 44528331 | 44528496 |
| chr11 | 44529351 | 44529636 |
| chr11 | 44532601 | 44532836 |
| chr11 | 44555881 | 44555996 |
| chr11 | 44560981 | 44561046 |
| chr11 | 44561221 | 44561376 |
| chr11 | 44573531 | 44573636 |
| chr11 | 44584511 | 44584636 |
| chr11 | 44588871 | 44588986 |
| chr11 | 44593961 | 44594336 |
| chr11 | 44628831 | 44629096 |
| chr11 | 44650121 | 44650356 |
| chr11 | 44655341 | 44655506 |
| chr11 | 44663941 | 44664106 |
| chr11 | 44664791 | 44664946 |
| chr11 | 44676841 | 44677056 |
| chr11 | 44677191 | 44677356 |
| chr11 | 44678761 | 44678866 |
| chr11 | 44745761 | 44745976 |

|       |          |          |
|-------|----------|----------|
| chr11 | 44746891 | 44747126 |
| chr11 | 44850821 | 44850956 |
| chr11 | 44870281 | 44870506 |
| chr11 | 44998061 | 44998356 |
| chr11 | 45196931 | 45197076 |
| chr11 | 45223861 | 45223996 |
| chr11 | 45262571 | 45262716 |
| chr11 | 45268011 | 45268106 |
| chr11 | 45293841 | 45293996 |
| chr11 | 45319151 | 45319306 |
| chr11 | 45334681 | 45334836 |
| chr11 | 45394021 | 45394146 |
| chr11 | 45478231 | 45478356 |
| chr11 | 45536701 | 45536876 |
| chr11 | 45541521 | 45541626 |
| chr11 | 45565951 | 45566106 |
| chr11 | 45643061 | 45643346 |
| chr11 | 45697921 | 45698046 |
| chr11 | 45869561 | 45869646 |
| chr11 | 45901461 | 45901676 |
| chr11 | 45939121 | 45939286 |
| chr11 | 45977721 | 45977896 |
| chr11 | 46043621 | 46043806 |
| chr11 | 46682731 | 46682916 |
| chr11 | 47394071 | 47394316 |
| chr11 | 48345881 | 48345976 |
| chr11 | 48609261 | 48609386 |
| chr11 | 48634411 | 48634626 |
| chr11 | 48931901 | 48932046 |
| chr11 | 48951201 | 48951356 |
| chr11 | 49556841 | 49556976 |
| chr11 | 49743551 | 49743706 |
| chr11 | 49744561 | 49744716 |
| chr11 | 49775261 | 49775596 |
| chr11 | 49824311 | 49824446 |
| chr11 | 49896151 | 49896226 |
| chr11 | 50096051 | 50096246 |
| chr11 | 50224841 | 50224996 |
| chr11 | 50417321 | 50417486 |
| chr11 | 50499811 | 50499946 |
| chr11 | 50566871 | 50566976 |
| chr11 | 51060531 | 51060686 |
| chr11 | 51844981 | 51845086 |
| chr11 | 51923631 | 51923736 |
| chr11 | 52116051 | 52116256 |
| chr11 | 52269871 | 52270026 |
| chr11 | 52270111 | 52270226 |
| chr11 | 52414611 | 52414736 |
| chr11 | 52479621 | 52479736 |
| chr11 | 52619211 | 52619326 |
| chr11 | 52773141 | 52773356 |
| chr11 | 53150971 | 53151106 |
| chr11 | 53339781 | 53339956 |

|       |          |          |
|-------|----------|----------|
| chr11 | 53344171 | 53344286 |
| chr11 | 53365041 | 53365146 |
| chr11 | 53483611 | 53483776 |
| chr11 | 53606601 | 53607016 |
| chr11 | 53607241 | 53607416 |
| chr11 | 53631371 | 53631506 |
| chr11 | 53639921 | 53640226 |
| chr11 | 53747641 | 53747846 |
| chr11 | 53899521 | 53899756 |
| chr11 | 53903801 | 53904116 |
| chr11 | 53985631 | 53985786 |
| chr11 | 54001691 | 54001806 |
| chr11 | 54006891 | 54006996 |
| chr11 | 54009401 | 54009516 |
| chr11 | 54137651 | 54137786 |
| chr11 | 54625711 | 54625876 |
| chr11 | 54728491 | 54728716 |
| chr11 | 54735661 | 54735816 |
| chr11 | 54738141 | 54738256 |
| chr11 | 54741051 | 54741226 |
| chr11 | 54741351 | 54741436 |
| chr11 | 54741911 | 54742076 |
| chr11 | 54765131 | 54765276 |
| chr11 | 55049471 | 55049696 |
| chr11 | 55067501 | 55067676 |
| chr11 | 55176611 | 55176726 |
| chr11 | 55271801 | 55271986 |
| chr11 | 55322401 | 55322496 |
| chr11 | 55352491 | 55352746 |
| chr11 | 55444951 | 55445066 |
| chr11 | 55524681 | 55524886 |
| chr11 | 55525161 | 55525536 |
| chr11 | 55528991 | 55529126 |
| chr11 | 55529151 | 55529306 |
| chr11 | 55615531 | 55615706 |
| chr11 | 55615801 | 55616036 |
| chr11 | 55634991 | 55635336 |
| chr11 | 55817891 | 55818166 |
| chr11 | 55994281 | 55994416 |
| chr11 | 55994551 | 55994726 |
| chr11 | 56394161 | 56394286 |
| chr11 | 56520111 | 56520206 |
| chr11 | 56594181 | 56594366 |
| chr11 | 57094541 | 57094636 |
| chr11 | 57347591 | 57347726 |
| chr11 | 57347801 | 57347936 |
| chr11 | 57409011 | 57409166 |
| chr11 | 57432171 | 57432406 |
| chr11 | 57470661 | 57470786 |
| chr11 | 57505501 | 57505696 |
| chr11 | 57505791 | 57505996 |
| chr11 | 57506011 | 57506206 |
| chr11 | 57535971 | 57536126 |

|       |          |          |
|-------|----------|----------|
| chr11 | 57576811 | 57577256 |
| chr11 | 57582911 | 57583086 |
| chr11 | 57589801 | 57590116 |
| chr11 | 57611361 | 57611546 |
| chr11 | 57653051 | 57653296 |
| chr11 | 57653331 | 57653496 |
| chr11 | 57680861 | 57681006 |
| chr11 | 57720211 | 57720476 |
| chr11 | 58040701 | 58040766 |
| chr11 | 58054301 | 58054476 |
| chr11 | 58421301 | 58421446 |
| chr11 | 58620201 | 58620316 |
| chr11 | 59168691 | 59168816 |
| chr11 | 59200671 | 59200806 |
| chr11 | 59201581 | 59201716 |
| chr11 | 59471721 | 59471856 |
| chr11 | 59734361 | 59734546 |
| chr11 | 59742421 | 59742836 |
| chr11 | 59782231 | 59782326 |
| chr11 | 59790971 | 59791176 |
| chr11 | 59810771 | 59810896 |
| chr11 | 60111351 | 60111456 |
| chr11 | 60125061 | 60125196 |
| chr11 | 60126871 | 60127016 |
| chr11 | 60201391 | 60201586 |
| chr11 | 60791391 | 60791526 |
| chr11 | 60816041 | 60816186 |
| chr11 | 60816451 | 60816606 |
| chr11 | 60828151 | 60828356 |
| chr11 | 61050841 | 61051096 |
| chr11 | 61051181 | 61051306 |
| chr11 | 61081241 | 61081446 |
| chr11 | 61126891 | 61127066 |
| chr11 | 61127161 | 61127286 |
| chr11 | 61297981 | 61298096 |
| chr11 | 61789361 | 61789476 |
| chr11 | 61870021 | 61870146 |
| chr11 | 62092841 | 62092976 |
| chr11 | 62471181 | 62471296 |
| chr11 | 62636601 | 62636756 |
| chr11 | 62637191 | 62637366 |
| chr11 | 62746041 | 62746206 |
| chr11 | 62856451 | 62856716 |
| chr11 | 62890651 | 62890756 |
| chr11 | 62905601 | 62905726 |
| chr11 | 62925581 | 62925736 |
| chr11 | 62930601 | 62930716 |
| chr11 | 62946181 | 62946326 |
| chr11 | 62996791 | 62996946 |
| chr11 | 62997201 | 62997336 |
| chr11 | 63069541 | 63069656 |
| chr11 | 63241991 | 63242096 |
| chr11 | 63242101 | 63242236 |

|       |          |          |
|-------|----------|----------|
| chr11 | 63276431 | 63276646 |
| chr11 | 63458561 | 63458686 |
| chr11 | 63607481 | 63607596 |
| chr11 | 63677121 | 63677256 |
| chr11 | 63734841 | 63735006 |
| chr11 | 63784031 | 63784136 |
| chr11 | 63817081 | 63817266 |
| chr11 | 63827041 | 63827116 |
| chr11 | 63838911 | 63839066 |
| chr11 | 63839931 | 63840086 |
| chr11 | 63934561 | 63934696 |
| chr11 | 64004161 | 64004366 |
| chr11 | 64047561 | 64047736 |
| chr11 | 64108161 | 64108416 |
| chr11 | 64131421 | 64131586 |
| chr11 | 64270701 | 64270836 |
| chr11 | 64284801 | 64284976 |
| chr11 | 64294151 | 64294356 |
| chr11 | 64358841 | 64358936 |
| chr11 | 64659211 | 64659346 |
| chr11 | 64659461 | 64659576 |
| chr11 | 64676271 | 64676366 |
| chr11 | 64690951 | 64691056 |
| chr11 | 64773781 | 64773876 |
| chr11 | 64875771 | 64875996 |
| chr11 | 65021341 | 65021446 |
| chr11 | 65025701 | 65025976 |
| chr11 | 65042931 | 65043096 |
| chr11 | 65677541 | 65677816 |
| chr11 | 65678541 | 65678726 |
| chr11 | 66422981 | 66423196 |
| chr11 | 66429541 | 66429696 |
| chr11 | 66438971 | 66439116 |
| chr11 | 66936351 | 66936456 |
| chr11 | 67361421 | 67361526 |
| chr11 | 67375091 | 67375186 |
| chr11 | 67375561 | 67375666 |
| chr11 | 67466621 | 67466716 |
| chr11 | 67538731 | 67538876 |
| chr11 | 67641761 | 67641916 |
| chr11 | 67822011 | 67822146 |
| chr11 | 67822221 | 67822406 |
| chr11 | 67824061 | 67824216 |
| chr11 | 67827451 | 67827596 |
| chr11 | 67839841 | 67840006 |
| chr11 | 67845091 | 67845246 |
| chr11 | 67860561 | 67860666 |
| chr11 | 67866071 | 67866246 |
| chr11 | 67866851 | 67867246 |
| chr11 | 67888881 | 67889066 |
| chr11 | 67889141 | 67889366 |
| chr11 | 67890611 | 67890716 |
| chr11 | 67904251 | 67904376 |

|       |          |          |
|-------|----------|----------|
| chr11 | 67904931 | 67905076 |
| chr11 | 67906071 | 67906466 |
| chr11 | 67929831 | 67929946 |
| chr11 | 67951481 | 67951826 |
| chr11 | 67960341 | 67960486 |
| chr11 | 67960531 | 67960686 |
| chr11 | 67960771 | 67960946 |
| chr11 | 67961061 | 67961206 |
| chr11 | 67961451 | 67961676 |
| chr11 | 68015041 | 68015246 |
| chr11 | 68019841 | 68020066 |
| chr11 | 68028081 | 68028366 |
| chr11 | 68090171 | 68090406 |
| chr11 | 68090571 | 68090676 |
| chr11 | 68096761 | 68096866 |
| chr11 | 68102801 | 68103006 |
| chr11 | 68129331 | 68129716 |
| chr11 | 68167841 | 68167966 |
| chr11 | 68168031 | 68168206 |
| chr11 | 68168601 | 68168776 |
| chr11 | 68169601 | 68169706 |
| chr11 | 68171571 | 68171936 |
| chr11 | 68194581 | 68194766 |
| chr11 | 68194961 | 68195196 |
| chr11 | 68195231 | 68195426 |
| chr11 | 68207221 | 68207336 |
| chr11 | 68267401 | 68267606 |
| chr11 | 68407921 | 68408206 |
| chr11 | 68418831 | 68418976 |
| chr11 | 68439821 | 68439936 |
| chr11 | 68510321 | 68510446 |
| chr11 | 68727931 | 68728146 |
| chr11 | 69148961 | 69149226 |
| chr11 | 69149241 | 69149376 |
| chr11 | 69186981 | 69187246 |
| chr11 | 69187881 | 69188226 |
| chr11 | 69253341 | 69253496 |
| chr11 | 69253901 | 69254086 |
| chr11 | 69343321 | 69343896 |
| chr11 | 69481971 | 69482156 |
| chr11 | 69532261 | 69532506 |
| chr11 | 69769741 | 69769956 |
| chr11 | 69913721 | 69913846 |
| chr11 | 69930771 | 69930886 |
| chr11 | 70029131 | 70029266 |
| chr11 | 70256431 | 70256586 |
| chr11 | 70335111 | 70335246 |
| chr11 | 70388951 | 70389096 |
| chr11 | 70389931 | 70390026 |
| chr11 | 70638531 | 70638626 |
| chr11 | 71246381 | 71246526 |
| chr11 | 71416891 | 71417036 |
| chr11 | 71579461 | 71579646 |



|       |          |          |
|-------|----------|----------|
| chr11 | 71579721 | 71579946 |
| chr11 | 71803241 | 71803446 |
| chr11 | 71871151 | 71871376 |
| chr11 | 71887021 | 71887226 |
| chr11 | 71888271 | 71888706 |
| chr11 | 71984841 | 71984986 |
| chr11 | 72039431 | 72039536 |
| chr11 | 72039921 | 72040016 |
| chr11 | 72278001 | 72278256 |
| chr11 | 72283371 | 72283536 |
| chr11 | 72319631 | 72319786 |
| chr11 | 72383351 | 72383446 |
| chr11 | 72814311 | 72814406 |
| chr11 | 73079151 | 73079406 |
| chr11 | 73097061 | 73097196 |
| chr11 | 74315491 | 74315676 |
| chr11 | 74364561 | 74364666 |
| chr11 | 74365031 | 74365156 |
| chr11 | 74551221 | 74551336 |
| chr11 | 74831101 | 74831346 |
| chr11 | 74955861 | 74956016 |
| chr11 | 75061621 | 75061896 |
| chr11 | 75077841 | 75077956 |
| chr11 | 75089651 | 75089816 |
| chr11 | 75097701 | 75098026 |
| chr11 | 75098211 | 75098326 |
| chr11 | 75135251 | 75135486 |
| chr11 | 75139051 | 75139196 |
| chr11 | 75258081 | 75258176 |
| chr11 | 75260311 | 75260386 |
| chr11 | 75260431 | 75260876 |
| chr11 | 75351551 | 75351746 |
| chr11 | 75351761 | 75351976 |
| chr11 | 75405561 | 75405736 |
| chr11 | 75519601 | 75519736 |
| chr11 | 75563791 | 75563986 |
| chr11 | 75615821 | 75615986 |
| chr11 | 75661961 | 75662326 |
| chr11 | 75662801 | 75663066 |
| chr11 | 75715951 | 75716126 |
| chr11 | 75721431 | 75721516 |
| chr11 | 75765091 | 75765246 |
| chr11 | 75765461 | 75765586 |
| chr11 | 75780411 | 75780576 |
| chr11 | 76076011 | 76076176 |
| chr11 | 76103711 | 76103946 |
| chr11 | 76119691 | 76119876 |
| chr11 | 76141091 | 76141416 |
| chr11 | 76142631 | 76142776 |
| chr11 | 76144101 | 76144626 |
| chr11 | 76151241 | 76151456 |
| chr11 | 76158061 | 76158586 |
| chr11 | 76165591 | 76165776 |

|       |          |          |
|-------|----------|----------|
| chr11 | 76175261 | 76175416 |
| chr11 | 76175871 | 76176096 |
| chr11 | 76179501 | 76179696 |
| chr11 | 76179891 | 76180046 |
| chr11 | 76191071 | 76191196 |
| chr11 | 76191501 | 76191596 |
| chr11 | 76192151 | 76192336 |
| chr11 | 76196301 | 76196656 |
| chr11 | 76199331 | 76199556 |
| chr11 | 76201931 | 76202036 |
| chr11 | 76202271 | 76202416 |
| chr11 | 76204911 | 76204996 |
| chr11 | 76205211 | 76205366 |
| chr11 | 76266181 | 76266376 |
| chr11 | 76283311 | 76283456 |
| chr11 | 76405201 | 76405386 |
| chr11 | 76405451 | 76405666 |
| chr11 | 76405761 | 76405926 |
| chr11 | 76429251 | 76429436 |
| chr11 | 76436971 | 76437106 |
| chr11 | 76443061 | 76443226 |
| chr11 | 76475271 | 76475606 |
| chr11 | 76478721 | 76478896 |
| chr11 | 76525461 | 76525856 |
| chr11 | 76732821 | 76732966 |
| chr11 | 77010691 | 77010786 |
| chr11 | 77581411 | 77581526 |
| chr11 | 77588551 | 77588776 |
| chr11 | 77597401 | 77597556 |
| chr11 | 77646941 | 77647226 |
| chr11 | 77658381 | 77658516 |
| chr11 | 77671541 | 77671976 |
| chr11 | 77693701 | 77693776 |
| chr11 | 77729361 | 77729496 |
| chr11 | 77752871 | 77753056 |
| chr11 | 77758551 | 77758656 |
| chr11 | 77769521 | 77769766 |
| chr11 | 77781601 | 77781706 |
| chr11 | 77937531 | 77937606 |
| chr11 | 77937641 | 77937756 |
| chr11 | 77951631 | 77951786 |
| chr11 | 78006041 | 78006146 |
| chr11 | 78164701 | 78164936 |
| chr11 | 78180371 | 78180496 |
| chr11 | 78189061 | 78189266 |
| chr11 | 78246731 | 78246966 |
| chr11 | 78584891 | 78585056 |
| chr11 | 78602191 | 78602766 |
| chr11 | 78603751 | 78603976 |
| chr11 | 78604161 | 78604436 |
| chr11 | 78632301 | 78632476 |
| chr11 | 78636331 | 78636476 |
| chr11 | 78636981 | 78637136 |

|       |          |          |
|-------|----------|----------|
| chr11 | 78638251 | 78638416 |
| chr11 | 78641451 | 78641706 |
| chr11 | 78641771 | 78641906 |
| chr11 | 78645531 | 78645876 |
| chr11 | 78645911 | 78646086 |
| chr11 | 78665121 | 78665256 |
| chr11 | 78749021 | 78749176 |
| chr11 | 79320171 | 79320316 |
| chr11 | 79478471 | 79478586 |
| chr11 | 79568941 | 79569096 |
| chr11 | 79592941 | 79593046 |
| chr11 | 79595821 | 79595946 |
| chr11 | 79598231 | 79598456 |
| chr11 | 79622431 | 79622576 |
| chr11 | 79894561 | 79894666 |
| chr11 | 80105891 | 80106206 |
| chr11 | 80121501 | 80121636 |
| chr11 | 80394161 | 80394376 |
| chr11 | 80586811 | 80586906 |
| chr11 | 80693621 | 80693876 |
| chr11 | 80737491 | 80737846 |
| chr11 | 80799211 | 80799346 |
| chr11 | 80858241 | 80858396 |
| chr11 | 80978771 | 80978916 |
| chr11 | 81016131 | 81016496 |
| chr11 | 81056311 | 81056476 |
| chr11 | 81089901 | 81090006 |
| chr11 | 81093541 | 81093686 |
| chr11 | 81099251 | 81099506 |
| chr11 | 81099521 | 81099626 |
| chr11 | 81103671 | 81103886 |
| chr11 | 81106181 | 81106316 |
| chr11 | 81115621 | 81115936 |
| chr11 | 81116191 | 81116376 |
| chr11 | 81125091 | 81125346 |
| chr11 | 81179111 | 81179226 |
| chr11 | 81186441 | 81186606 |
| chr11 | 81186621 | 81186686 |
| chr11 | 81187841 | 81187986 |
| chr11 | 81188111 | 81188266 |
| chr11 | 81221161 | 81221286 |
| chr11 | 81334661 | 81334786 |
| chr11 | 81334891 | 81334996 |
| chr11 | 81344411 | 81344566 |
| chr11 | 81414551 | 81414636 |
| chr11 | 81468431 | 81468566 |
| chr11 | 81613281 | 81613406 |
| chr11 | 81774111 | 81774266 |
| chr11 | 82075621 | 82075806 |
| chr11 | 82156481 | 82156606 |
| chr11 | 82207091 | 82207286 |
| chr11 | 82212831 | 82212966 |
| chr11 | 82218171 | 82218286 |

|       |          |          |
|-------|----------|----------|
| chr11 | 82226271 | 82226486 |
| chr11 | 82234871 | 82235086 |
| chr11 | 82289341 | 82289466 |
| chr11 | 82303721 | 82303956 |
| chr11 | 82304131 | 82304296 |
| chr11 | 82324861 | 82325026 |
| chr11 | 82334911 | 82335176 |
| chr11 | 82370811 | 82370926 |
| chr11 | 82396631 | 82396786 |
| chr11 | 82557061 | 82557196 |
| chr11 | 82557201 | 82557326 |
| chr11 | 82647891 | 82647986 |
| chr11 | 82654191 | 82654346 |
| chr11 | 82654451 | 82654666 |
| chr11 | 82662071 | 82662206 |
| chr11 | 82667781 | 82667916 |
| chr11 | 82704841 | 82704996 |
| chr11 | 82705051 | 82705246 |
| chr11 | 83120181 | 83120326 |
| chr11 | 83199391 | 83199526 |
| chr11 | 83636201 | 83636276 |
| chr11 | 83636451 | 83636686 |
| chr11 | 83652031 | 83652246 |
| chr11 | 83654001 | 83654116 |
| chr11 | 83681441 | 83681736 |
| chr11 | 83693391 | 83693516 |
| chr11 | 83694091 | 83694336 |
| chr11 | 83698881 | 83698976 |
| chr11 | 83724321 | 83724406 |
| chr11 | 83730111 | 83730516 |
| chr11 | 83738581 | 83738706 |
| chr11 | 83741401 | 83741516 |
| chr11 | 83742961 | 83743146 |
| chr11 | 83752361 | 83752466 |
| chr11 | 83817921 | 83818066 |
| chr11 | 83882291 | 83882426 |
| chr11 | 83882451 | 83882606 |
| chr11 | 84165871 | 84166076 |
| chr11 | 84198891 | 84199036 |
| chr11 | 84200191 | 84200316 |
| chr11 | 84231601 | 84231716 |
| chr11 | 84247761 | 84247856 |
| chr11 | 84249741 | 84249856 |
| chr11 | 84249951 | 84250096 |
| chr11 | 84297741 | 84297826 |
| chr11 | 84346091 | 84346296 |
| chr11 | 84356661 | 84356796 |
| chr11 | 84357211 | 84357326 |
| chr11 | 84358261 | 84358496 |
| chr11 | 84382931 | 84383306 |
| chr11 | 84403251 | 84403616 |
| chr11 | 84440351 | 84440456 |
| chr11 | 84440491 | 84440616 |

|       |          |          |
|-------|----------|----------|
| chr11 | 84477201 | 84477356 |
| chr11 | 84488981 | 84489406 |
| chr11 | 84489431 | 84489556 |
| chr11 | 84506291 | 84506546 |
| chr11 | 84517391 | 84517836 |
| chr11 | 84518111 | 84518236 |
| chr11 | 84538981 | 84539116 |
| chr11 | 84542601 | 84542886 |
| chr11 | 84546491 | 84546796 |
| chr11 | 84547291 | 84547406 |
| chr11 | 84548131 | 84548316 |
| chr11 | 84561181 | 84561296 |
| chr11 | 84591371 | 84591556 |
| chr11 | 85059661 | 85059936 |
| chr11 | 85308361 | 85308686 |
| chr11 | 85308691 | 85308856 |
| chr11 | 85341831 | 85341976 |
| chr11 | 85373571 | 85373726 |
| chr11 | 85387271 | 85387366 |
| chr11 | 85387461 | 85387596 |
| chr11 | 85387971 | 85388226 |
| chr11 | 85388291 | 85388396 |
| chr11 | 85435181 | 85435286 |
| chr11 | 85441251 | 85441346 |
| chr11 | 85441661 | 85441946 |
| chr11 | 85445091 | 85445256 |
| chr11 | 85455151 | 85455336 |
| chr11 | 85459001 | 85459166 |
| chr11 | 85459781 | 85459956 |
| chr11 | 85494851 | 85495006 |
| chr11 | 85512731 | 85512876 |
| chr11 | 85512901 | 85513076 |
| chr11 | 85513381 | 85513496 |
| chr11 | 85536521 | 85536686 |
| chr11 | 85536741 | 85536926 |
| chr11 | 85553591 | 85553716 |
| chr11 | 85583081 | 85583226 |
| chr11 | 85591911 | 85592086 |
| chr11 | 85592101 | 85592226 |
| chr11 | 85592581 | 85592716 |
| chr11 | 85733331 | 85733636 |
| chr11 | 85757681 | 85757806 |
| chr11 | 85806111 | 85806316 |
| chr11 | 85811471 | 85811666 |
| chr11 | 85811711 | 85811816 |
| chr11 | 85832161 | 85832256 |
| chr11 | 85832601 | 85832696 |
| chr11 | 86211691 | 86211936 |
| chr11 | 86387441 | 86387766 |
| chr11 | 86397441 | 86397556 |
| chr11 | 86403751 | 86403876 |
| chr11 | 86404231 | 86404386 |
| chr11 | 86777671 | 86777806 |

|       |          |          |
|-------|----------|----------|
| chr11 | 86785231 | 86785366 |
| chr11 | 86785701 | 86785846 |
| chr11 | 86799361 | 86799536 |
| chr11 | 86805481 | 86805806 |
| chr11 | 87134461 | 87134576 |
| chr11 | 87249931 | 87250056 |
| chr11 | 87505721 | 87505906 |
| chr11 | 87506071 | 87506176 |
| chr11 | 87513241 | 87513486 |
| chr11 | 87782621 | 87782996 |
| chr11 | 87843561 | 87843776 |
| chr11 | 87919641 | 87919856 |
| chr11 | 87922521 | 87922636 |
| chr11 | 87923721 | 87923856 |
| chr11 | 87940081 | 87940236 |
| chr11 | 87958581 | 87958986 |
| chr11 | 87964681 | 87964846 |
| chr11 | 87967931 | 87968056 |
| chr11 | 87970091 | 87970366 |
| chr11 | 87976671 | 87976836 |
| chr11 | 87988371 | 87988496 |
| chr11 | 87988581 | 87988756 |
| chr11 | 87989321 | 87989516 |
| chr11 | 87989711 | 87989956 |
| chr11 | 87994391 | 87994526 |
| chr11 | 87996461 | 87996586 |
| chr11 | 87996841 | 87997076 |
| chr11 | 88003561 | 88003696 |
| chr11 | 88049871 | 88049986 |
| chr11 | 88050361 | 88050586 |
| chr11 | 88052011 | 88052246 |
| chr11 | 88052251 | 88052456 |
| chr11 | 88057141 | 88057276 |
| chr11 | 88078391 | 88078676 |
| chr11 | 88082831 | 88082966 |
| chr11 | 88085251 | 88085356 |
| chr11 | 88091121 | 88091626 |
| chr11 | 88092881 | 88093116 |
| chr11 | 88093221 | 88093716 |
| chr11 | 88096901 | 88097026 |
| chr11 | 88109481 | 88109636 |
| chr11 | 88129751 | 88129856 |
| chr11 | 88129941 | 88130146 |
| chr11 | 88130591 | 88130706 |
| chr11 | 88134221 | 88134406 |
| chr11 | 88228961 | 88229126 |
| chr11 | 88276471 | 88277036 |
| chr11 | 88284101 | 88284456 |
| chr11 | 88341441 | 88341676 |
| chr11 | 88343031 | 88343236 |
| chr11 | 88343291 | 88343436 |
| chr11 | 88344831 | 88344926 |
| chr11 | 88371431 | 88371586 |

|       |          |          |
|-------|----------|----------|
| chr11 | 88375741 | 88375916 |
| chr11 | 88376961 | 88377086 |
| chr11 | 88377161 | 88377306 |
| chr11 | 88377411 | 88377656 |
| chr11 | 88398611 | 88398756 |
| chr11 | 88401501 | 88401616 |
| chr11 | 88418951 | 88419116 |
| chr11 | 88421361 | 88421456 |
| chr11 | 88434191 | 88434286 |
| chr11 | 88435131 | 88435376 |
| chr11 | 88436611 | 88436786 |
| chr11 | 88438971 | 88439156 |
| chr11 | 88507161 | 88507366 |
| chr11 | 88510481 | 88511056 |
| chr11 | 88511741 | 88511936 |
| chr11 | 88512061 | 88512266 |
| chr11 | 88513331 | 88513426 |
| chr11 | 88518631 | 88518836 |
| chr11 | 88518891 | 88519056 |
| chr11 | 88519131 | 88519276 |
| chr11 | 88519551 | 88519736 |
| chr11 | 88525101 | 88525296 |
| chr11 | 88538171 | 88538286 |
| chr11 | 88590091 | 88590216 |
| chr11 | 88594081 | 88594176 |
| chr11 | 88689481 | 88689726 |
| chr11 | 88959051 | 88959286 |
| chr11 | 88994021 | 88994166 |
| chr11 | 89022411 | 89022696 |
| chr11 | 89090611 | 89090746 |
| chr11 | 89113621 | 89113776 |
| chr11 | 89123841 | 89123996 |
| chr11 | 89142031 | 89142226 |
| chr11 | 89156401 | 89156556 |
| chr11 | 89174951 | 89175186 |
| chr11 | 89231681 | 89231886 |
| chr11 | 89234851 | 89234976 |
| chr11 | 89324801 | 89324896 |
| chr11 | 89423001 | 89423186 |
| chr11 | 89801931 | 89802266 |
| chr11 | 89802281 | 89802466 |
| chr11 | 89824131 | 89824246 |
| chr11 | 89900331 | 89900436 |
| chr11 | 90041011 | 90041246 |
| chr11 | 90172631 | 90172966 |
| chr11 | 90198011 | 90198166 |
| chr11 | 90364431 | 90365086 |
| chr11 | 91020751 | 91020906 |
| chr11 | 91105631 | 91105846 |
| chr11 | 93087741 | 93087886 |
| chr11 | 93088031 | 93088246 |
| chr11 | 93409751 | 93409866 |
| chr11 | 93410061 | 93410216 |

|       |          |          |
|-------|----------|----------|
| chr11 | 93474681 | 93475086 |
| chr11 | 93795331 | 93795416 |
| chr11 | 93795521 | 93795656 |
| chr11 | 94005681 | 94005886 |
| chr11 | 94202501 | 94202666 |
| chr11 | 94224271 | 94224446 |
| chr11 | 94229211 | 94229476 |
| chr11 | 94229551 | 94229636 |
| chr11 | 94230971 | 94231066 |
| chr11 | 94281101 | 94281246 |
| chr11 | 94281451 | 94281906 |
| chr11 | 94284991 | 94285106 |
| chr11 | 94407671 | 94408036 |
| chr11 | 94408071 | 94408166 |
| chr11 | 94531981 | 94532126 |
| chr11 | 94533011 | 94533266 |
| chr11 | 94533311 | 94533816 |
| chr11 | 94541571 | 94541946 |
| chr11 | 94542121 | 94542196 |
| chr11 | 94696941 | 94697066 |
| chr11 | 94697331 | 94697446 |
| chr11 | 94917611 | 94917746 |
| chr11 | 94920301 | 94920416 |
| chr11 | 94921501 | 94921616 |
| chr11 | 94921671 | 94921826 |
| chr11 | 94954961 | 94955106 |
| chr11 | 95049701 | 95049806 |
| chr11 | 95155801 | 95156066 |
| chr11 | 95219991 | 95220186 |
| chr11 | 95387981 | 95388136 |
| chr11 | 95412241 | 95412376 |
| chr11 | 95414371 | 95414766 |
| chr11 | 95450711 | 95450796 |
| chr11 | 95461821 | 95461986 |
| chr11 | 95463931 | 95464046 |
| chr11 | 95581041 | 95581166 |
| chr11 | 95915101 | 95915206 |
| chr11 | 95956901 | 95957086 |
| chr11 | 96076641 | 96076786 |
| chr11 | 96122861 | 96123216 |
| chr11 | 96126811 | 96126946 |
| chr11 | 96130491 | 96130776 |
| chr11 | 96138141 | 96138316 |
| chr11 | 96139271 | 96139396 |
| chr11 | 96150801 | 96151076 |
| chr11 | 96152831 | 96152936 |
| chr11 | 96181001 | 96181196 |
| chr11 | 96212871 | 96213006 |
| chr11 | 96216221 | 96216346 |
| chr11 | 96223661 | 96223976 |
| chr11 | 96224871 | 96225086 |
| chr11 | 96237771 | 96237926 |
| chr11 | 96238091 | 96238316 |



|       |          |          |
|-------|----------|----------|
| chr11 | 96258001 | 96258196 |
| chr11 | 96264091 | 96264416 |
| chr11 | 96272801 | 96272976 |
| chr11 | 96277651 | 96277806 |
| chr11 | 96278291 | 96278436 |
| chr11 | 96278681 | 96278826 |
| chr11 | 96313521 | 96313676 |
| chr11 | 96320981 | 96321076 |
| chr11 | 96332951 | 96333096 |
| chr11 | 96376751 | 96376866 |
| chr11 | 96389631 | 96389776 |
| chr11 | 96394741 | 96394856 |
| chr11 | 96394941 | 96395486 |
| chr11 | 96398811 | 96399106 |
| chr11 | 96406561 | 96406836 |
| chr11 | 96410601 | 96410766 |
| chr11 | 96411971 | 96412326 |
| chr11 | 96429511 | 96429886 |
| chr11 | 96436731 | 96436836 |
| chr11 | 96442401 | 96442556 |
| chr11 | 96454161 | 96454276 |
| chr11 | 96460831 | 96460976 |
| chr11 | 96461621 | 96462076 |
| chr11 | 96463001 | 96463086 |
| chr11 | 96464021 | 96464166 |
| chr11 | 96489791 | 96489906 |
| chr11 | 96491171 | 96491406 |
| chr11 | 96503201 | 96503356 |
| chr11 | 96529761 | 96529856 |
| chr11 | 96544791 | 96544926 |
| chr11 | 96546241 | 96546496 |
| chr11 | 96546601 | 96546686 |
| chr11 | 96552171 | 96552306 |
| chr11 | 96552471 | 96552766 |
| chr11 | 96553891 | 96554106 |
| chr11 | 96554161 | 96554696 |
| chr11 | 96555401 | 96555636 |
| chr11 | 96556931 | 96557266 |
| chr11 | 96558341 | 96558516 |
| chr11 | 96559181 | 96559446 |
| chr11 | 96694691 | 96694816 |
| chr11 | 96695051 | 96695206 |
| chr11 | 96695261 | 96695666 |
| chr11 | 96695691 | 96695816 |
| chr11 | 96700141 | 96700396 |
| chr11 | 96701961 | 96702266 |
| chr11 | 96707931 | 96708156 |
| chr11 | 96708181 | 96708506 |
| chr11 | 96715401 | 96715576 |
| chr11 | 96715681 | 96715876 |
| chr11 | 96719981 | 96720126 |
| chr11 | 96722771 | 96722936 |
| chr11 | 96722981 | 96723346 |

|       |           |           |
|-------|-----------|-----------|
| chr11 | 96723361  | 96723556  |
| chr11 | 96792001  | 96792116  |
| chr11 | 96961031  | 96961136  |
| chr11 | 97165701  | 97166106  |
| chr11 | 97325911  | 97326026  |
| chr11 | 97328671  | 97328816  |
| chr11 | 97328871  | 97329016  |
| chr11 | 97379571  | 97379676  |
| chr11 | 97434411  | 97434596  |
| chr11 | 97440801  | 97440916  |
| chr11 | 97489031  | 97489116  |
| chr11 | 97489411  | 97489646  |
| chr11 | 97549821  | 97549916  |
| chr11 | 97627551  | 97627716  |
| chr11 | 97627741  | 97627996  |
| chr11 | 97628121  | 97628206  |
| chr11 | 98083251  | 98083516  |
| chr11 | 98190591  | 98190776  |
| chr11 | 98313691  | 98313836  |
| chr11 | 98313841  | 98314176  |
| chr11 | 98314341  | 98314436  |
| chr11 | 98377051  | 98377306  |
| chr11 | 98380171  | 98380346  |
| chr11 | 98665251  | 98665536  |
| chr11 | 98665741  | 98665916  |
| chr11 | 98666031  | 98666416  |
| chr11 | 98718861  | 98719276  |
| chr11 | 98725721  | 98725836  |
| chr11 | 98782401  | 98782746  |
| chr11 | 98784271  | 98784426  |
| chr11 | 98784801  | 98785056  |
| chr11 | 98785101  | 98785286  |
| chr11 | 98785431  | 98785526  |
| chr11 | 98785581  | 98785866  |
| chr11 | 98786091  | 98786306  |
| chr11 | 98887931  | 98888066  |
| chr11 | 98891221  | 98891416  |
| chr11 | 98893091  | 98893226  |
| chr11 | 98908331  | 98908486  |
| chr11 | 98929011  | 98929186  |
| chr11 | 98963551  | 98963666  |
| chr11 | 99270911  | 99271066  |
| chr11 | 99282501  | 99282606  |
| chr11 | 99310021  | 99310186  |
| chr11 | 99810581  | 99810726  |
| chr11 | 99899451  | 99899606  |
| chr11 | 99940071  | 99940166  |
| chr11 | 99952751  | 99952866  |
| chr11 | 99953981  | 99954136  |
| chr11 | 100134021 | 100134146 |
| chr11 | 100141351 | 100141456 |
| chr11 | 100146601 | 100146756 |
| chr11 | 100147011 | 100147116 |

|       |           |           |
|-------|-----------|-----------|
| chr11 | 100252291 | 100252446 |
| chr11 | 100336911 | 100337286 |
| chr11 | 100358281 | 100358426 |
| chr11 | 100599171 | 100599346 |
| chr11 | 100632361 | 100632676 |
| chr11 | 100633571 | 100633716 |
| chr11 | 100665481 | 100665626 |
| chr11 | 100744341 | 100744466 |
| chr11 | 100747621 | 100747836 |
| chr11 | 100807191 | 100807396 |
| chr11 | 100879461 | 100879656 |
| chr11 | 100882801 | 100882906 |
| chr11 | 100931831 | 100931946 |
| chr11 | 100955141 | 100955336 |
| chr11 | 101085861 | 101086086 |
| chr11 | 101093911 | 101094086 |
| chr11 | 101178471 | 101178736 |
| chr11 | 101228421 | 101228546 |
| chr11 | 101279091 | 101279226 |
| chr11 | 101295361 | 101295486 |
| chr11 | 101485091 | 101485426 |
| chr11 | 101516571 | 101516916 |
| chr11 | 101522981 | 101523156 |
| chr11 | 101530221 | 101530356 |
| chr11 | 101594391 | 101594536 |
| chr11 | 101625241 | 101625606 |
| chr11 | 101631541 | 101631966 |
| chr11 | 101710311 | 101710676 |
| chr11 | 101712971 | 101713106 |
| chr11 | 101717411 | 101717686 |
| chr11 | 101720311 | 101720466 |
| chr11 | 101753171 | 101753396 |
| chr11 | 101760341 | 101760436 |
| chr11 | 101768841 | 101769486 |
| chr11 | 101780931 | 101781166 |
| chr11 | 101811181 | 101811306 |
| chr11 | 101815611 | 101815856 |
| chr11 | 101855781 | 101855996 |
| chr11 | 101883431 | 101883556 |
| chr11 | 102043221 | 102043336 |
| chr11 | 102044221 | 102044346 |
| chr11 | 102051951 | 102052116 |
| chr11 | 102061811 | 102062046 |
| chr11 | 102151511 | 102151656 |
| chr11 | 102324371 | 102324566 |
| chr11 | 102347551 | 102347766 |
| chr11 | 102352411 | 102352536 |
| chr11 | 102399291 | 102399496 |
| chr11 | 102425721 | 102425876 |
| chr11 | 102440441 | 102440746 |
| chr11 | 102441471 | 102441686 |
| chr11 | 102446401 | 102446576 |
| chr11 | 102446821 | 102446946 |

|       |           |           |
|-------|-----------|-----------|
| chr11 | 102586851 | 102586996 |
| chr11 | 102608141 | 102608266 |
| chr11 | 102752491 | 102752716 |
| chr11 | 102769341 | 102769436 |
| chr11 | 102780011 | 102780126 |
| chr11 | 102780661 | 102780866 |
| chr11 | 102803921 | 102804046 |
| chr11 | 102814801 | 102814956 |
| chr11 | 102963971 | 102964106 |
| chr11 | 103108301 | 103108526 |
| chr11 | 103223861 | 103224016 |
| chr11 | 103521011 | 103521266 |
| chr11 | 103596351 | 103596646 |
| chr11 | 103632221 | 103632346 |
| chr11 | 103656771 | 103656906 |
| chr11 | 103670451 | 103670576 |
| chr11 | 103777621 | 103777746 |
| chr11 | 103883701 | 103883796 |
| chr11 | 103971281 | 103971696 |
| chr11 | 104030981 | 104031196 |
| chr11 | 104213251 | 104213386 |
| chr11 | 104435991 | 104436186 |
| chr11 | 104438361 | 104438496 |
| chr11 | 104439031 | 104439116 |
| chr11 | 105144291 | 105144416 |
| chr11 | 105168181 | 105168306 |
| chr11 | 105168341 | 105168476 |
| chr11 | 105251931 | 105252026 |
| chr11 | 105276041 | 105276166 |
| chr11 | 105321491 | 105321586 |
| chr11 | 105324351 | 105324606 |
| chr11 | 105339781 | 105339956 |
| chr11 | 105339981 | 105340116 |
| chr11 | 105365281 | 105365386 |
| chr11 | 106272981 | 106273146 |
| chr11 | 106306331 | 106306446 |
| chr11 | 106388211 | 106388566 |
| chr11 | 106390111 | 106390266 |
| chr11 | 106396371 | 106396506 |
| chr11 | 106425641 | 106425756 |
| chr11 | 106475731 | 106475956 |
| chr11 | 106490941 | 106491096 |
| chr11 | 106543811 | 106543936 |
| chr11 | 107153601 | 107153776 |
| chr11 | 107269381 | 107269546 |
| chr11 | 107289361 | 107289466 |
| chr11 | 107316831 | 107316946 |
| chr11 | 107529171 | 107529286 |
| chr11 | 107579451 | 107579616 |
| chr11 | 107626011 | 107626136 |
| chr11 | 107629151 | 107629366 |
| chr11 | 107848761 | 107848936 |
| chr11 | 107850511 | 107850666 |

|       |           |           |
|-------|-----------|-----------|
| chr11 | 107878571 | 107878676 |
| chr11 | 107879291 | 107879436 |
| chr11 | 107917791 | 107917936 |
| chr11 | 107963221 | 107963366 |
| chr11 | 107972761 | 107972926 |
| chr11 | 108067511 | 108067636 |
| chr11 | 108084051 | 108084346 |
| chr11 | 108084821 | 108084966 |
| chr11 | 108085731 | 108085836 |
| chr11 | 108123391 | 108123496 |
| chr11 | 108236801 | 108237076 |
| chr11 | 108701611 | 108701966 |
| chr11 | 108856781 | 108856916 |
| chr11 | 108897711 | 108898006 |
| chr11 | 108922391 | 108922556 |
| chr11 | 108922991 | 108923156 |
| chr11 | 109022881 | 109023366 |
| chr11 | 109023731 | 109023796 |
| chr11 | 109025951 | 109026126 |
| chr11 | 109026161 | 109026316 |
| chr11 | 109026591 | 109026726 |
| chr11 | 109026811 | 109027176 |
| chr11 | 109054261 | 109054396 |
| chr11 | 109108131 | 109108246 |
| chr11 | 109108321 | 109108466 |
| chr11 | 109311651 | 109311806 |
| chr11 | 109522161 | 109522266 |
| chr11 | 109811201 | 109811306 |
| chr11 | 109852031 | 109852296 |
| chr11 | 110212241 | 110212426 |
| chr11 | 110243341 | 110243496 |
| chr11 | 110777821 | 110778006 |
| chr11 | 110939481 | 110939706 |
| chr11 | 111137631 | 111137756 |
| chr11 | 111356061 | 111356366 |
| chr11 | 111362801 | 111362946 |
| chr11 | 111374591 | 111374686 |
| chr11 | 111374811 | 111375046 |
| chr11 | 111375181 | 111375316 |
| chr11 | 111548271 | 111548366 |
| chr11 | 111609301 | 111609636 |
| chr11 | 111628581 | 111628716 |
| chr11 | 111655161 | 111655316 |
| chr11 | 111664601 | 111664866 |
| chr11 | 111692721 | 111692866 |
| chr11 | 111693191 | 111693306 |
| chr11 | 111710071 | 111710176 |
| chr11 | 111774611 | 111774716 |
| chr11 | 111777271 | 111777476 |
| chr11 | 111962221 | 111962356 |
| chr11 | 111971101 | 111971346 |
| chr11 | 111971381 | 111971526 |
| chr11 | 111996841 | 111997046 |

|       |           |           |
|-------|-----------|-----------|
| chr11 | 111998471 | 111998616 |
| chr11 | 112055421 | 112055576 |
| chr11 | 112230041 | 112230206 |
| chr11 | 112358851 | 112358956 |
| chr11 | 112437991 | 112438226 |
| chr11 | 112465491 | 112465786 |
| chr11 | 112465811 | 112465906 |
| chr11 | 112544361 | 112544486 |
| chr11 | 112545071 | 112545166 |
| chr11 | 112572681 | 112572896 |
| chr11 | 112676901 | 112677226 |
| chr11 | 112686251 | 112686746 |
| chr11 | 112689241 | 112689396 |
| chr11 | 112701801 | 112702006 |
| chr11 | 112795621 | 112795846 |
| chr11 | 112798521 | 112798636 |
| chr11 | 112798951 | 112799186 |
| chr11 | 112799211 | 112799276 |
| chr11 | 112806381 | 112806566 |
| chr11 | 112808121 | 112808316 |
| chr11 | 112862451 | 112862566 |
| chr11 | 112877101 | 112877206 |
| chr11 | 112923421 | 112923546 |
| chr11 | 112923581 | 112923926 |
| chr11 | 112924081 | 112924266 |
| chr11 | 112960031 | 112960236 |
| chr11 | 112960411 | 112960686 |
| chr11 | 112963691 | 112964006 |
| chr11 | 112964061 | 112964376 |
| chr11 | 112986371 | 112986696 |
| chr11 | 112993361 | 112993426 |
| chr11 | 113000101 | 113000436 |
| chr11 | 113037441 | 113037796 |
| chr11 | 113047911 | 113048236 |
| chr11 | 113048391 | 113048526 |
| chr11 | 113105521 | 113105676 |
| chr11 | 113108281 | 113108546 |
| chr11 | 113110491 | 113110766 |
| chr11 | 113115321 | 113115456 |
| chr11 | 113115661 | 113115996 |
| chr11 | 113182331 | 113182586 |
| chr11 | 113184131 | 113184366 |
| chr11 | 113184391 | 113184596 |
| chr11 | 113197401 | 113197506 |
| chr11 | 113199801 | 113199946 |
| chr11 | 113255751 | 113255896 |
| chr11 | 113261061 | 113261296 |
| chr11 | 113269051 | 113269236 |
| chr11 | 113337321 | 113337486 |
| chr11 | 113337521 | 113337746 |
| chr11 | 113355661 | 113355876 |
| chr11 | 113368651 | 113368896 |
| chr11 | 113615371 | 113615586 |

|       |           |           |
|-------|-----------|-----------|
| chr11 | 113670431 | 113670556 |
| chr11 | 113701271 | 113701426 |
| chr11 | 113791391 | 113791676 |
| chr11 | 113805991 | 113806236 |
| chr11 | 113831891 | 113832356 |
| chr11 | 113833081 | 113833226 |
| chr11 | 113833271 | 113833496 |
| chr11 | 113835221 | 113835616 |
| chr11 | 113856721 | 113856966 |
| chr11 | 113863871 | 113864396 |
| chr11 | 113871141 | 113871286 |
| chr11 | 113929141 | 113929336 |
| chr11 | 113945811 | 113945956 |
| chr11 | 113981811 | 113982216 |
| chr11 | 113982221 | 113982396 |
| chr11 | 114032801 | 114033086 |
| chr11 | 114033101 | 114033296 |
| chr11 | 114033481 | 114033676 |
| chr11 | 114125931 | 114126096 |
| chr11 | 114133731 | 114133956 |
| chr11 | 114141051 | 114141166 |
| chr11 | 114151961 | 114152106 |
| chr11 | 114262981 | 114263186 |
| chr11 | 114290961 | 114291306 |
| chr11 | 114408061 | 114408176 |
| chr11 | 114442241 | 114442386 |
| chr11 | 114451771 | 114451926 |
| chr11 | 114473231 | 114473606 |
| chr11 | 114556541 | 114556676 |
| chr11 | 114619971 | 114620596 |
| chr11 | 114635021 | 114635226 |
| chr11 | 114638711 | 114639166 |
| chr11 | 114661741 | 114661846 |
| chr11 | 114666231 | 114666516 |
| chr11 | 114666541 | 114666706 |
| chr11 | 114738671 | 114738796 |
| chr11 | 114886681 | 114886786 |
| chr11 | 114887001 | 114887146 |
| chr11 | 114887361 | 114887676 |
| chr11 | 114887721 | 114887876 |
| chr11 | 114887881 | 114888026 |
| chr11 | 114915551 | 114915846 |
| chr11 | 114915891 | 114916056 |
| chr11 | 114917681 | 114917796 |
| chr11 | 114967041 | 114967226 |
| chr11 | 114971751 | 114971896 |
| chr11 | 115013581 | 115013876 |
| chr11 | 115015201 | 115015466 |
| chr11 | 115022051 | 115022416 |
| chr11 | 115026341 | 115026466 |
| chr11 | 115027031 | 115027176 |
| chr11 | 115056261 | 115056456 |
| chr11 | 115056501 | 115056666 |

|       |           |           |
|-------|-----------|-----------|
| chr11 | 115063781 | 115064036 |
| chr11 | 115139061 | 115139176 |
| chr11 | 115166311 | 115166526 |
| chr11 | 115265081 | 115265236 |
| chr11 | 115265341 | 115265536 |
| chr11 | 115289751 | 115289876 |
| chr11 | 115515061 | 115515226 |
| chr11 | 115570081 | 115570176 |
| chr11 | 115585921 | 115586326 |
| chr11 | 115645181 | 115645286 |
| chr11 | 115647031 | 115647336 |
| chr11 | 115648511 | 115648666 |
| chr11 | 115650131 | 115650316 |
| chr11 | 115652901 | 115653066 |
| chr11 | 115772831 | 115772976 |
| chr11 | 115917881 | 115918026 |
| chr11 | 115977421 | 115977566 |
| chr11 | 115979231 | 115979326 |
| chr11 | 116006531 | 116006656 |
| chr11 | 116055671 | 116055936 |
| chr11 | 116055941 | 116056306 |
| chr11 | 116220271 | 116220466 |
| chr11 | 116470911 | 116471226 |
| chr11 | 116486051 | 116486216 |
| chr11 | 116628811 | 116629016 |
| chr11 | 116630901 | 116631066 |
| chr11 | 116634901 | 116635076 |
| chr11 | 116637241 | 116637416 |
| chr11 | 116642901 | 116643066 |
| chr11 | 116698291 | 116698456 |
| chr11 | 116698561 | 116698696 |
| chr11 | 116698701 | 116698796 |
| chr11 | 116729901 | 116730036 |
| chr11 | 116751461 | 116751926 |
| chr11 | 116770241 | 116770606 |
| chr11 | 116819681 | 116820106 |
| chr11 | 116820961 | 116821136 |
| chr11 | 116852301 | 116852436 |
| chr11 | 116876001 | 116876246 |
| chr11 | 116876381 | 116876496 |
| chr11 | 116878871 | 116879036 |
| chr11 | 116880251 | 116880446 |
| chr11 | 116899131 | 116899276 |
| chr11 | 116899711 | 116899906 |
| chr11 | 116908901 | 116909116 |
| chr11 | 116914401 | 116914596 |
| chr11 | 116932641 | 116932746 |
| chr11 | 116936841 | 116937016 |
| chr11 | 117052101 | 117052236 |
| chr11 | 117094711 | 117094886 |
| chr11 | 117147341 | 117147506 |
| chr11 | 117188431 | 117188516 |
| chr11 | 117205611 | 117205756 |



|       |           |           |
|-------|-----------|-----------|
| chr11 | 117246241 | 117246466 |
| chr11 | 117246491 | 117246916 |
| chr11 | 117270371 | 117270616 |
| chr11 | 117314021 | 117314196 |
| chr11 | 117351951 | 117352046 |
| chr11 | 117370271 | 117370416 |
| chr11 | 117435721 | 117435916 |
| chr11 | 117706191 | 117706366 |
| chr11 | 117726211 | 117726366 |
| chr11 | 117752561 | 117752696 |
| chr11 | 117781361 | 117781476 |
| chr11 | 117790241 | 117790366 |
| chr11 | 117958541 | 117959016 |
| chr11 | 118022551 | 118022696 |
| chr11 | 118158831 | 118158986 |
| chr11 | 118286501 | 118286626 |
| chr11 | 118295991 | 118296086 |
| chr11 | 118353781 | 118353916 |
| chr11 | 118374431 | 118374586 |
| chr11 | 118426421 | 118426596 |
| chr11 | 118426621 | 118426826 |
| chr11 | 118494461 | 118494556 |
| chr11 | 118544441 | 118544556 |
| chr11 | 118623811 | 118623926 |
| chr11 | 118713331 | 118713486 |
| chr11 | 118714501 | 118714656 |
| chr11 | 118942691 | 118942826 |
| chr11 | 118946141 | 118946516 |
| chr11 | 118946611 | 118946796 |
| chr11 | 118992961 | 118993176 |
| chr11 | 119031441 | 119031706 |
| chr11 | 119212361 | 119212476 |
| chr11 | 119372411 | 119372606 |
| chr11 | 119375301 | 119375486 |
| chr11 | 119442101 | 119442266 |
| chr11 | 119602821 | 119602946 |
| chr11 | 119759801 | 119759986 |
| chr11 | 119786451 | 119786566 |
| chr11 | 119844441 | 119844866 |
| chr11 | 119885381 | 119885576 |
| chr11 | 120032771 | 120032956 |
| chr11 | 120041431 | 120041616 |
| chr11 | 120057671 | 120057886 |
| chr11 | 120133671 | 120133836 |
| chr11 | 120183731 | 120183886 |
| chr11 | 120511761 | 120511966 |
| chr11 | 120527041 | 120527126 |
| chr11 | 120831271 | 120831406 |
| chr11 | 120968961 | 120969046 |
| chr11 | 121353461 | 121353676 |
| chr10 | 3076961   | 3077076   |
| chr10 | 3201951   | 3202066   |
| chr10 | 4638491   | 4638626   |

|       |          |          |
|-------|----------|----------|
| chr10 | 4785671  | 4785796  |
| chr10 | 5620111  | 5620266  |
| chr10 | 5792511  | 5792706  |
| chr10 | 5823341  | 5823446  |
| chr10 | 6013741  | 6013996  |
| chr10 | 6060481  | 6060586  |
| chr10 | 6108891  | 6108956  |
| chr10 | 6187681  | 6187886  |
| chr10 | 6192281  | 6192426  |
| chr10 | 6198511  | 6198746  |
| chr10 | 6200941  | 6201076  |
| chr10 | 6213511  | 6213916  |
| chr10 | 6218991  | 6219106  |
| chr10 | 6229131  | 6229376  |
| chr10 | 6233701  | 6233816  |
| chr10 | 6234781  | 6235236  |
| chr10 | 6238271  | 6238476  |
| chr10 | 6239941  | 6240096  |
| chr10 | 6266411  | 6266576  |
| chr10 | 6368501  | 6368656  |
| chr10 | 6451641  | 6451786  |
| chr10 | 6486901  | 6487066  |
| chr10 | 6506581  | 6506696  |
| chr10 | 6524941  | 6525016  |
| chr10 | 6808171  | 6808296  |
| chr10 | 7284981  | 7285186  |
| chr10 | 7297331  | 7297466  |
| chr10 | 7633251  | 7633496  |
| chr10 | 7786061  | 7786176  |
| chr10 | 7823761  | 7823906  |
| chr10 | 7827491  | 7827576  |
| chr10 | 7904301  | 7904596  |
| chr10 | 7907291  | 7907416  |
| chr10 | 7911671  | 7911826  |
| chr10 | 7914341  | 7914556  |
| chr10 | 7949911  | 7950096  |
| chr10 | 8179521  | 8179646  |
| chr10 | 8196541  | 8196686  |
| chr10 | 8452211  | 8452536  |
| chr10 | 8452621  | 8452906  |
| chr10 | 8453221  | 8453316  |
| chr10 | 8475781  | 8476036  |
| chr10 | 8600661  | 8600736  |
| chr10 | 8704111  | 8704266  |
| chr10 | 8961581  | 8961706  |
| chr10 | 9128621  | 9128786  |
| chr10 | 9321061  | 9321236  |
| chr10 | 9370111  | 9370396  |
| chr10 | 10035011 | 10035126 |
| chr10 | 10578801 | 10578996 |
| chr10 | 11205581 | 11205706 |
| chr10 | 11452491 | 11452606 |
| chr10 | 11708601 | 11708766 |

|       |          |          |
|-------|----------|----------|
| chr10 | 12198161 | 12198226 |
| chr10 | 12236731 | 12236826 |
| chr10 | 12242591 | 12242676 |
| chr10 | 12242761 | 12242896 |
| chr10 | 12421031 | 12421126 |
| chr10 | 12427171 | 12427346 |
| chr10 | 12478181 | 12478316 |
| chr10 | 12482301 | 12482406 |
| chr10 | 12482421 | 12482646 |
| chr10 | 12569901 | 12570046 |
| chr10 | 12573721 | 12573826 |
| chr10 | 12607541 | 12607866 |
| chr10 | 12797521 | 12797646 |
| chr10 | 12809111 | 12809236 |
| chr10 | 12809271 | 12809406 |
| chr10 | 13096651 | 13096766 |
| chr10 | 13267351 | 13267516 |
| chr10 | 13379071 | 13379246 |
| chr10 | 13447481 | 13447586 |
| chr10 | 13607331 | 13607486 |
| chr10 | 13661521 | 13661736 |
| chr10 | 13661751 | 13661886 |
| chr10 | 13664851 | 13664956 |
| chr10 | 13673981 | 13674076 |
| chr10 | 13708081 | 13708336 |
| chr10 | 13708361 | 13708486 |
| chr10 | 13720981 | 13721076 |
| chr10 | 13726031 | 13726166 |
| chr10 | 13745971 | 13746156 |
| chr10 | 14154561 | 14154746 |
| chr10 | 14952571 | 14952666 |
| chr10 | 16790391 | 16790566 |
| chr10 | 16886541 | 16886846 |
| chr10 | 16905811 | 16906076 |
| chr10 | 16906101 | 16906206 |
| chr10 | 16920161 | 16920336 |
| chr10 | 16926381 | 16926536 |
| chr10 | 16989901 | 16990006 |
| chr10 | 17021991 | 17022136 |
| chr10 | 17042741 | 17042896 |
| chr10 | 17057471 | 17057636 |
| chr10 | 17211461 | 17211606 |
| chr10 | 17216601 | 17216756 |
| chr10 | 17231501 | 17231736 |
| chr10 | 17251091 | 17251236 |
| chr10 | 17259091 | 17259266 |
| chr10 | 17379311 | 17379466 |
| chr10 | 17416711 | 17416846 |
| chr10 | 17417961 | 17418126 |
| chr10 | 17418251 | 17418426 |
| chr10 | 17637651 | 17637786 |
| chr10 | 18062981 | 18063106 |
| chr10 | 18147691 | 18147796 |

|       |          |          |
|-------|----------|----------|
| chr10 | 18152541 | 18152646 |
| chr10 | 18152691 | 18152786 |
| chr10 | 18152891 | 18153186 |
| chr10 | 18159831 | 18160116 |
| chr10 | 18160151 | 18160436 |
| chr10 | 18308201 | 18308366 |
| chr10 | 18332531 | 18332706 |
| chr10 | 18340981 | 18341106 |
| chr10 | 18566211 | 18566316 |
| chr10 | 18847061 | 18847196 |
| chr10 | 18966721 | 18966856 |
| chr10 | 19052351 | 19052536 |
| chr10 | 19093481 | 19093746 |
| chr10 | 19131351 | 19131576 |
| chr10 | 19134031 | 19134186 |
| chr10 | 19138441 | 19138696 |
| chr10 | 19148691 | 19148786 |
| chr10 | 19175021 | 19175166 |
| chr10 | 19175261 | 19175506 |
| chr10 | 19179981 | 19180086 |
| chr10 | 19180131 | 19180306 |
| chr10 | 19286151 | 19286286 |
| chr10 | 19287521 | 19287706 |
| chr10 | 19298741 | 19298886 |
| chr10 | 19504791 | 19504966 |
| chr10 | 19572741 | 19572836 |
| chr10 | 19691521 | 19691656 |
| chr10 | 19806511 | 19806676 |
| chr10 | 19839571 | 19839696 |
| chr10 | 19842761 | 19842986 |
| chr10 | 19932021 | 19932156 |
| chr10 | 19932911 | 19933036 |
| chr10 | 19974941 | 19975136 |
| chr10 | 19975791 | 19976126 |
| chr10 | 19976131 | 19976286 |
| chr10 | 19976901 | 19977066 |
| chr10 | 20188411 | 20188776 |
| chr10 | 20355231 | 20355336 |
| chr10 | 20412671 | 20412786 |
| chr10 | 20413591 | 20413706 |
| chr10 | 20544701 | 20544806 |
| chr10 | 20772041 | 20772146 |
| chr10 | 20854881 | 20855046 |
| chr10 | 20885241 | 20885316 |
| chr10 | 21075321 | 21075466 |
| chr10 | 21124861 | 21124986 |
| chr10 | 21135011 | 21135186 |
| chr10 | 21145521 | 21145626 |
| chr10 | 21436631 | 21436786 |
| chr10 | 21479621 | 21479876 |
| chr10 | 21528641 | 21529036 |
| chr10 | 21573081 | 21573176 |
| chr10 | 21612971 | 21613126 |

|       |          |          |
|-------|----------|----------|
| chr10 | 21617191 | 21617316 |
| chr10 | 21625141 | 21625246 |
| chr10 | 21626831 | 21626966 |
| chr10 | 21664881 | 21664986 |
| chr10 | 22348221 | 22348386 |
| chr10 | 22557901 | 22558106 |
| chr10 | 22583081 | 22583226 |
| chr10 | 22615571 | 22615656 |
| chr10 | 22642661 | 22642786 |
| chr10 | 22752561 | 22752666 |
| chr10 | 22849631 | 22849756 |
| chr10 | 22854651 | 22854776 |
| chr10 | 22906451 | 22906596 |
| chr10 | 22922941 | 22923086 |
| chr10 | 23231451 | 23231586 |
| chr10 | 23231651 | 23231786 |
| chr10 | 23292471 | 23292596 |
| chr10 | 23401231 | 23401366 |
| chr10 | 23815261 | 23815376 |
| chr10 | 23839531 | 23839726 |
| chr10 | 23853671 | 23853776 |
| chr10 | 23853901 | 23854336 |
| chr10 | 24026621 | 24026736 |
| chr10 | 24173951 | 24174126 |
| chr10 | 24318471 | 24318646 |
| chr10 | 24500171 | 24500326 |
| chr10 | 24531471 | 24531566 |
| chr10 | 24612951 | 24613076 |
| chr10 | 24615941 | 24616186 |
| chr10 | 24616841 | 24617036 |
| chr10 | 24617641 | 24617946 |
| chr10 | 24648541 | 24648696 |
| chr10 | 24655421 | 24655656 |
| chr10 | 24670831 | 24670906 |
| chr10 | 24750981 | 24751496 |
| chr10 | 24770001 | 24770146 |
| chr10 | 24772431 | 24772556 |
| chr10 | 24800781 | 24800916 |
| chr10 | 24801031 | 24801296 |
| chr10 | 24801621 | 24801786 |
| chr10 | 24887691 | 24887806 |
| chr10 | 24922601 | 24922786 |
| chr10 | 24970231 | 24970386 |
| chr10 | 25116881 | 25117146 |
| chr10 | 25117281 | 25117416 |
| chr10 | 25127141 | 25127296 |
| chr10 | 25139121 | 25139266 |
| chr10 | 25220801 | 25220946 |
| chr10 | 25310691 | 25310796 |
| chr10 | 25310821 | 25311186 |
| chr10 | 25453931 | 25454136 |
| chr10 | 25598191 | 25598336 |
| chr10 | 26017151 | 26017346 |

|       |          |          |
|-------|----------|----------|
| chr10 | 26019091 | 26019256 |
| chr10 | 26441801 | 26442016 |
| chr10 | 26610051 | 26610146 |
| chr10 | 26823351 | 26823476 |
| chr10 | 26823881 | 26823986 |
| chr10 | 26901381 | 26901516 |
| chr10 | 26913341 | 26913446 |
| chr10 | 26997011 | 26997126 |
| chr10 | 27427391 | 27427516 |
| chr10 | 27697941 | 27698106 |
| chr10 | 27910341 | 27910426 |
| chr10 | 27961451 | 27961516 |
| chr10 | 27984321 | 27984436 |
| chr10 | 29376431 | 29376556 |
| chr10 | 29383121 | 29383376 |
| chr10 | 29597711 | 29597856 |
| chr10 | 30095371 | 30095816 |
| chr10 | 30336991 | 30337146 |
| chr10 | 30417121 | 30417196 |
| chr10 | 32674201 | 32674346 |
| chr10 | 33069321 | 33069416 |
| chr10 | 33369471 | 33369566 |
| chr10 | 33877931 | 33878136 |
| chr10 | 33990171 | 33990276 |
| chr10 | 34014311 | 34014406 |
| chr10 | 34561381 | 34561576 |
| chr10 | 34561681 | 34561826 |
| chr10 | 36278071 | 36278256 |
| chr10 | 36419211 | 36419436 |
| chr10 | 36494761 | 36494866 |
| chr10 | 37316231 | 37316346 |
| chr10 | 37358781 | 37358906 |
| chr10 | 37678441 | 37678566 |
| chr10 | 38244681 | 38244916 |
| chr10 | 38667141 | 38667336 |
| chr10 | 38938791 | 38938886 |
| chr10 | 38961931 | 38962036 |
| chr10 | 38962371 | 38962506 |
| chr10 | 39042571 | 39042706 |
| chr10 | 39116681 | 39116776 |
| chr10 | 39119831 | 39120016 |
| chr10 | 39123781 | 39123946 |
| chr10 | 39179771 | 39179936 |
| chr10 | 39207021 | 39207256 |
| chr10 | 39213041 | 39213146 |
| chr10 | 39223921 | 39224066 |
| chr10 | 39243111 | 39243296 |
| chr10 | 39247481 | 39247666 |
| chr10 | 39257801 | 39257946 |
| chr10 | 39269991 | 39270186 |
| chr10 | 39270221 | 39270326 |
| chr10 | 39315211 | 39315426 |
| chr10 | 39319561 | 39319736 |

|       |          |          |
|-------|----------|----------|
| chr10 | 39336061 | 39336276 |
| chr10 | 39349551 | 39349696 |
| chr10 | 39354381 | 39354506 |
| chr10 | 39362911 | 39363066 |
| chr10 | 39758581 | 39758666 |
| chr10 | 39758791 | 39758926 |
| chr10 | 39767511 | 39767736 |
| chr10 | 39792451 | 39792756 |
| chr10 | 39881281 | 39881496 |
| chr10 | 40028801 | 40029016 |
| chr10 | 40115091 | 40115206 |
| chr10 | 40132891 | 40133106 |
| chr10 | 40206131 | 40206266 |
| chr10 | 40211161 | 40211336 |
| chr10 | 40326781 | 40326986 |
| chr10 | 40327001 | 40327186 |
| chr10 | 40361281 | 40361466 |
| chr10 | 40373641 | 40373746 |
| chr10 | 40425921 | 40426106 |
| chr10 | 40438841 | 40438936 |
| chr10 | 40439291 | 40439396 |
| chr10 | 40441201 | 40441336 |
| chr10 | 40533061 | 40533236 |
| chr10 | 40558551 | 40558656 |
| chr10 | 40981611 | 40981796 |
| chr10 | 40983261 | 40983446 |
| chr10 | 41578111 | 41578236 |
| chr10 | 41623071 | 41623196 |
| chr10 | 41623731 | 41623886 |
| chr10 | 41874441 | 41874736 |
| chr10 | 41880761 | 41880966 |
| chr10 | 41926761 | 41926896 |
| chr10 | 42026191 | 42026286 |
| chr10 | 42106251 | 42106366 |
| chr10 | 42229251 | 42229346 |
| chr10 | 42244501 | 42244586 |
| chr10 | 42402871 | 42402966 |
| chr10 | 42580721 | 42580836 |
| chr10 | 42630021 | 42630146 |
| chr10 | 42639951 | 42640116 |
| chr10 | 42640521 | 42640636 |
| chr10 | 42663341 | 42663466 |
| chr10 | 42669631 | 42669746 |
| chr10 | 42690271 | 42690456 |
| chr10 | 42691741 | 42691856 |
| chr10 | 42714541 | 42714666 |
| chr10 | 42715721 | 42715906 |
| chr10 | 42725471 | 42725626 |
| chr10 | 42725821 | 42725906 |
| chr10 | 42732931 | 42733046 |
| chr10 | 42809421 | 42809696 |
| chr10 | 42901861 | 42901986 |
| chr10 | 43020271 | 43020446 |

|       |          |          |
|-------|----------|----------|
| chr10 | 43020581 | 43021116 |
| chr10 | 43046461 | 43046656 |
| chr10 | 43059761 | 43059866 |
| chr10 | 43127991 | 43128156 |
| chr10 | 43128541 | 43128766 |
| chr10 | 43129431 | 43129576 |
| chr10 | 43206931 | 43207086 |
| chr10 | 43290101 | 43290316 |
| chr10 | 43353491 | 43353596 |
| chr10 | 43407511 | 43407636 |
| chr10 | 43738771 | 43738866 |
| chr10 | 44045711 | 44046156 |
| chr10 | 44132191 | 44132376 |
| chr10 | 44133771 | 44133896 |
| chr10 | 44153821 | 44153946 |
| chr10 | 44154051 | 44154216 |
| chr10 | 44154361 | 44154556 |
| chr10 | 44165041 | 44165126 |
| chr10 | 44167911 | 44168126 |
| chr10 | 44168851 | 44168986 |
| chr10 | 44177581 | 44177836 |
| chr10 | 44181451 | 44181736 |
| chr10 | 44188131 | 44188326 |
| chr10 | 44188361 | 44188556 |
| chr10 | 44188621 | 44188836 |
| chr10 | 44227531 | 44227656 |
| chr10 | 44369331 | 44369436 |
| chr10 | 44589771 | 44589866 |
| chr10 | 44629581 | 44629676 |
| chr10 | 44791641 | 44791956 |
| chr10 | 44798741 | 44798866 |
| chr10 | 44826561 | 44826766 |
| chr10 | 44830111 | 44830256 |
| chr10 | 44835961 | 44836256 |
| chr10 | 44882101 | 44882306 |
| chr10 | 44918221 | 44918476 |
| chr10 | 45099111 | 45099346 |
| chr10 | 45338581 | 45338726 |
| chr10 | 45495641 | 45496156 |
| chr10 | 45501411 | 45501506 |
| chr10 | 45501631 | 45501726 |
| chr10 | 45501781 | 45501946 |
| chr10 | 45562901 | 45563136 |
| chr10 | 45578141 | 45578286 |
| chr10 | 45734311 | 45734426 |
| chr10 | 46170721 | 46170806 |
| chr10 | 47457271 | 47457406 |
| chr10 | 50700001 | 50700206 |
| chr10 | 50842111 | 50842246 |
| chr10 | 51300701 | 51300866 |
| chr10 | 51303341 | 51303496 |
| chr10 | 51376771 | 51376946 |
| chr10 | 51457811 | 51457926 |



|       |          |          |
|-------|----------|----------|
| chr10 | 51930381 | 51930476 |
| chr10 | 51931421 | 51931576 |
| chr10 | 51963551 | 51963646 |
| chr10 | 52431241 | 52431396 |
| chr10 | 52431441 | 52431616 |
| chr10 | 52433221 | 52433376 |
| chr10 | 53489831 | 53489976 |
| chr10 | 53617291 | 53617426 |
| chr10 | 53874891 | 53875046 |
| chr10 | 56058451 | 56058646 |
| chr10 | 56104641 | 56104736 |
| chr10 | 56112841 | 56112996 |
| chr10 | 56120181 | 56120416 |
| chr10 | 57749991 | 57750106 |
| chr10 | 57985521 | 57985686 |
| chr10 | 58109681 | 58109776 |
| chr10 | 58109871 | 58110066 |
| chr10 | 58331091 | 58331226 |
| chr10 | 58331891 | 58332016 |
| chr10 | 58345141 | 58345256 |
| chr10 | 58374981 | 58375176 |
| chr10 | 58485551 | 58485706 |
| chr10 | 58485871 | 58485966 |
| chr10 | 58799921 | 58800086 |
| chr10 | 58897811 | 58897916 |
| chr10 | 58898811 | 58899006 |
| chr10 | 58899401 | 58899566 |
| chr10 | 58933031 | 58933236 |
| chr10 | 58998441 | 58998526 |
| chr10 | 59136951 | 59137076 |
| chr10 | 59149081 | 59149246 |
| chr10 | 59151571 | 59151766 |
| chr10 | 59193411 | 59193576 |
| chr10 | 59194761 | 59195066 |
| chr10 | 59195641 | 59195796 |
| chr10 | 59234861 | 59234976 |
| chr10 | 59324571 | 59324676 |
| chr10 | 59492191 | 59492346 |
| chr10 | 59643921 | 59644016 |
| chr10 | 59666471 | 59666656 |
| chr10 | 59667481 | 59667676 |
| chr10 | 59698291 | 59698416 |
| chr10 | 59747621 | 59747756 |
| chr10 | 59849191 | 59849436 |
| chr10 | 59852501 | 59852796 |
| chr10 | 59869221 | 59869396 |
| chr10 | 59870451 | 59870556 |
| chr10 | 59893941 | 59894046 |
| chr10 | 59897731 | 59897836 |
| chr10 | 59900041 | 59900126 |
| chr10 | 59935271 | 59935416 |
| chr10 | 59935591 | 59935726 |
| chr10 | 59953171 | 59953286 |

|       |          |          |
|-------|----------|----------|
| chr10 | 59974561 | 59974766 |
| chr10 | 59976061 | 59976266 |
| chr10 | 59978411 | 59978596 |
| chr10 | 59978611 | 59978736 |
| chr10 | 59984791 | 59984886 |
| chr10 | 59988261 | 59988796 |
| chr10 | 60018141 | 60018316 |
| chr10 | 60030941 | 60031116 |
| chr10 | 60031131 | 60031256 |
| chr10 | 60182861 | 60183016 |
| chr10 | 60187771 | 60188006 |
| chr10 | 60195981 | 60196136 |
| chr10 | 60212311 | 60212616 |
| chr10 | 60214641 | 60214736 |
| chr10 | 60219601 | 60219786 |
| chr10 | 60257991 | 60258106 |
| chr10 | 60281241 | 60281596 |
| chr10 | 60313681 | 60313876 |
| chr10 | 60317431 | 60317586 |
| chr10 | 60319361 | 60319566 |
| chr10 | 60329201 | 60329456 |
| chr10 | 60344361 | 60344586 |
| chr10 | 60350931 | 60351056 |
| chr10 | 60412071 | 60412276 |
| chr10 | 60444001 | 60444206 |
| chr10 | 60464501 | 60464776 |
| chr10 | 60596501 | 60596626 |
| chr10 | 60644101 | 60644226 |
| chr10 | 60708081 | 60708196 |
| chr10 | 60724111 | 60724206 |
| chr10 | 60724211 | 60724306 |
| chr10 | 60724321 | 60724416 |
| chr10 | 60724531 | 60724736 |
| chr10 | 60741901 | 60742016 |
| chr10 | 60808691 | 60809046 |
| chr10 | 60940181 | 60940276 |
| chr10 | 60965511 | 60965866 |
| chr10 | 60972081 | 60972216 |
| chr10 | 60993771 | 60993926 |
| chr10 | 61022411 | 61022706 |
| chr10 | 61190911 | 61191116 |
| chr10 | 61191171 | 61191366 |
| chr10 | 61274921 | 61275046 |
| chr10 | 61276151 | 61276376 |
| chr10 | 61471551 | 61471646 |
| chr10 | 61541241 | 61541476 |
| chr10 | 61557691 | 61557816 |
| chr10 | 61570021 | 61570166 |
| chr10 | 61603891 | 61604276 |
| chr10 | 61612101 | 61612286 |
| chr10 | 61817781 | 61817896 |
| chr10 | 61926651 | 61926816 |
| chr10 | 62238981 | 62239196 |

|       |          |          |
|-------|----------|----------|
| chr10 | 62424131 | 62424216 |
| chr10 | 62448771 | 62448896 |
| chr10 | 62473901 | 62474076 |
| chr10 | 62882781 | 62882976 |
| chr10 | 62928281 | 62928476 |
| chr10 | 62937181 | 62937316 |
| chr10 | 62937731 | 62937896 |
| chr10 | 63105211 | 63105386 |
| chr10 | 63485171 | 63485316 |
| chr10 | 64032311 | 64032436 |
| chr10 | 66259741 | 66259816 |
| chr10 | 66293521 | 66293636 |
| chr10 | 66320001 | 66320116 |
| chr10 | 66323611 | 66323786 |
| chr10 | 66326371 | 66326546 |
| chr10 | 66379891 | 66380086 |
| chr10 | 66410241 | 66410376 |
| chr10 | 66412201 | 66412376 |
| chr10 | 66420921 | 66421146 |
| chr10 | 66421451 | 66421666 |
| chr10 | 66421881 | 66422036 |
| chr10 | 66444011 | 66444126 |
| chr10 | 66461031 | 66461186 |
| chr10 | 66471971 | 66472196 |
| chr10 | 66507491 | 66507656 |
| chr10 | 66679691 | 66679856 |
| chr10 | 66715541 | 66715646 |
| chr10 | 66723951 | 66724106 |
| chr10 | 66768251 | 66768386 |
| chr10 | 66768521 | 66768686 |
| chr10 | 67424001 | 67424156 |
| chr10 | 67531581 | 67531736 |
| chr10 | 67569031 | 67569176 |
| chr10 | 67587481 | 67587756 |
| chr10 | 67598891 | 67599026 |
| chr10 | 67607371 | 67607606 |
| chr10 | 67626601 | 67626786 |
| chr10 | 67627171 | 67627406 |
| chr10 | 67644991 | 67645136 |
| chr10 | 67676871 | 67677006 |
| chr10 | 67740611 | 67740746 |
| chr10 | 67748221 | 67748366 |
| chr10 | 67751371 | 67751496 |
| chr10 | 67841031 | 67841166 |
| chr10 | 68191421 | 68191526 |
| chr10 | 68195201 | 68195336 |
| chr10 | 68199811 | 68199946 |
| chr10 | 68302551 | 68302686 |
| chr10 | 68614301 | 68614426 |
| chr10 | 68660221 | 68660336 |
| chr10 | 68674511 | 68674616 |
| chr10 | 68701031 | 68701276 |
| chr10 | 68730631 | 68730756 |

|       |          |          |
|-------|----------|----------|
| chr10 | 68801011 | 68801146 |
| chr10 | 68966741 | 68966836 |
| chr10 | 68966941 | 68967136 |
| chr10 | 68979391 | 68979526 |
| chr10 | 68979671 | 68979816 |
| chr10 | 69000731 | 69000826 |
| chr10 | 69000861 | 69001056 |
| chr10 | 69267981 | 69268126 |
| chr10 | 69298021 | 69298196 |
| chr10 | 69350381 | 69350526 |
| chr10 | 69452411 | 69452586 |
| chr10 | 69469951 | 69470056 |
| chr10 | 69477021 | 69477446 |
| chr10 | 69494411 | 69494636 |
| chr10 | 69503231 | 69503446 |
| chr10 | 69513631 | 69513886 |
| chr10 | 69514861 | 69514986 |
| chr10 | 69515341 | 69515486 |
| chr10 | 69544161 | 69544406 |
| chr10 | 69544531 | 69544816 |
| chr10 | 69547741 | 69547976 |
| chr10 | 69549291 | 69549516 |
| chr10 | 69589541 | 69589656 |
| chr10 | 69589771 | 69590006 |
| chr10 | 69600161 | 69600246 |
| chr10 | 69684461 | 69684686 |
| chr10 | 69755321 | 69755486 |
| chr10 | 69759731 | 69759946 |
| chr10 | 69760111 | 69760256 |
| chr10 | 69763531 | 69763686 |
| chr10 | 70035741 | 70035836 |
| chr10 | 70038311 | 70038786 |
| chr10 | 70119831 | 70119956 |
| chr10 | 70256621 | 70256746 |
| chr10 | 70293111 | 70293206 |
| chr10 | 70335011 | 70335186 |
| chr10 | 70344841 | 70345396 |
| chr10 | 70420921 | 70421056 |
| chr10 | 70444821 | 70444926 |
| chr10 | 70523031 | 70523126 |
| chr10 | 70523261 | 70523456 |
| chr10 | 70533871 | 70534026 |
| chr10 | 70565881 | 70566036 |
| chr10 | 70611371 | 70611506 |
| chr10 | 70661391 | 70661556 |
| chr10 | 70763581 | 70763736 |
| chr10 | 70779841 | 70780006 |
| chr10 | 70842991 | 70843196 |
| chr10 | 70873241 | 70873346 |
| chr10 | 70873431 | 70873516 |
| chr10 | 70874441 | 70874656 |
| chr10 | 71133591 | 71133736 |
| chr10 | 73801801 | 73801926 |

|       |          |          |
|-------|----------|----------|
| chr10 | 74045201 | 74045336 |
| chr10 | 74045451 | 74045606 |
| chr10 | 74070381 | 74070526 |
| chr10 | 74124641 | 74124836 |
| chr10 | 74438841 | 74438956 |
| chr10 | 74507201 | 74507296 |
| chr10 | 74514471 | 74514666 |
| chr10 | 74536991 | 74537566 |
| chr10 | 74542191 | 74542526 |
| chr10 | 74628181 | 74628366 |
| chr10 | 74918421 | 74918556 |
| chr10 | 75280851 | 75280986 |
| chr10 | 75332961 | 75333136 |
| chr10 | 75334051 | 75334356 |
| chr10 | 75440011 | 75440156 |
| chr10 | 75492841 | 75493026 |
| chr10 | 75541011 | 75541316 |
| chr10 | 76417791 | 76417896 |
| chr10 | 76569091 | 76569276 |
| chr10 | 76569301 | 76569446 |
| chr10 | 76574961 | 76575126 |
| chr10 | 76575191 | 76575346 |
| chr10 | 76594881 | 76595266 |
| chr10 | 76604751 | 76604886 |
| chr10 | 76635351 | 76635506 |
| chr10 | 76637891 | 76638066 |
| chr10 | 76641521 | 76641666 |
| chr10 | 76648951 | 76649066 |
| chr10 | 76681831 | 76681956 |
| chr10 | 76691451 | 76691596 |
| chr10 | 76893281 | 76893386 |
| chr10 | 76893441 | 76893566 |
| chr10 | 77129761 | 77129876 |
| chr10 | 77458241 | 77458406 |
| chr10 | 77752631 | 77752986 |
| chr10 | 77753071 | 77753246 |
| chr10 | 77771811 | 77771996 |
| chr10 | 77874061 | 77874266 |
| chr10 | 79104621 | 79104736 |
| chr10 | 79209031 | 79209166 |
| chr10 | 79348951 | 79349046 |
| chr10 | 79349181 | 79349296 |
| chr10 | 79350091 | 79350446 |
| chr10 | 79452191 | 79452346 |
| chr10 | 79492051 | 79492156 |
| chr10 | 79612061 | 79612366 |
| chr10 | 79688931 | 79689046 |
| chr10 | 80211651 | 80211946 |
| chr10 | 80342051 | 80342286 |
| chr10 | 80365111 | 80365246 |
| chr10 | 80400941 | 80401126 |
| chr10 | 80764121 | 80764216 |
| chr10 | 80968831 | 80968966 |

|       |          |          |
|-------|----------|----------|
| chr10 | 81000201 | 81000526 |
| chr10 | 81002141 | 81002346 |
| chr10 | 82186441 | 82186646 |
| chr10 | 82187261 | 82187396 |
| chr10 | 82244591 | 82244736 |
| chr10 | 82443641 | 82443746 |
| chr10 | 82489191 | 82489306 |
| chr10 | 82517601 | 82517766 |
| chr10 | 82518271 | 82518416 |
| chr10 | 82532481 | 82532896 |
| chr10 | 82557451 | 82557706 |
| chr10 | 82563921 | 82564036 |
| chr10 | 82564141 | 82564266 |
| chr10 | 82575801 | 82576056 |
| chr10 | 82581821 | 82582056 |
| chr10 | 82640941 | 82641046 |
| chr10 | 83035551 | 83035736 |
| chr10 | 83276631 | 83276726 |
| chr10 | 83344281 | 83344446 |
| chr10 | 83344681 | 83344826 |
| chr10 | 83345351 | 83345496 |
| chr10 | 83361081 | 83361336 |
| chr10 | 83361791 | 83361956 |
| chr10 | 83387081 | 83387176 |
| chr10 | 83387231 | 83387636 |
| chr10 | 83387751 | 83387866 |
| chr10 | 83394791 | 83394946 |
| chr10 | 83451051 | 83451286 |
| chr10 | 83466301 | 83466426 |
| chr10 | 83747741 | 83747846 |
| chr10 | 83784281 | 83784406 |
| chr10 | 83813301 | 83813536 |
| chr10 | 83814791 | 83814926 |
| chr10 | 83815221 | 83815366 |
| chr10 | 83816571 | 83816686 |
| chr10 | 83818571 | 83818756 |
| chr10 | 83819771 | 83819916 |
| chr10 | 83821901 | 83822396 |
| chr10 | 83823141 | 83823326 |
| chr10 | 83863371 | 83863566 |
| chr10 | 83871721 | 83871966 |
| chr10 | 83876541 | 83876686 |
| chr10 | 83877191 | 83877506 |
| chr10 | 83962951 | 83963046 |
| chr10 | 84135251 | 84135356 |
| chr10 | 84140231 | 84140336 |
| chr10 | 84140821 | 84140976 |
| chr10 | 84141271 | 84141396 |
| chr10 | 84143281 | 84143426 |
| chr10 | 84170751 | 84170866 |
| chr10 | 84216601 | 84216716 |
| chr10 | 84252501 | 84252636 |
| chr10 | 84252671 | 84252906 |

|       |          |          |
|-------|----------|----------|
| chr10 | 84289021 | 84289256 |
| chr10 | 84316741 | 84316846 |
| chr10 | 84333621 | 84333756 |
| chr10 | 84390401 | 84390586 |
| chr10 | 84399331 | 84399556 |
| chr10 | 84452921 | 84453026 |
| chr10 | 84474091 | 84474206 |
| chr10 | 84663711 | 84663916 |
| chr10 | 84881571 | 84881836 |
| chr10 | 84910191 | 84910306 |
| chr10 | 85067311 | 85067456 |
| chr10 | 85067471 | 85067636 |
| chr10 | 85440471 | 85440676 |
| chr10 | 85762111 | 85762216 |
| chr10 | 85763541 | 85763696 |
| chr10 | 85764451 | 85764896 |
| chr10 | 85771481 | 85771606 |
| chr10 | 85909691 | 85910046 |
| chr10 | 86233391 | 86233566 |
| chr10 | 86233591 | 86233736 |
| chr10 | 86402301 | 86402496 |
| chr10 | 86420491 | 86420676 |
| chr10 | 86465681 | 86466036 |
| chr10 | 86466081 | 86466556 |
| chr10 | 86532291 | 86532446 |
| chr10 | 86533011 | 86533226 |
| chr10 | 86781361 | 86781576 |
| chr10 | 86860221 | 86860386 |
| chr10 | 86975921 | 86976306 |
| chr10 | 86984411 | 86984526 |
| chr10 | 87274891 | 87275026 |
| chr10 | 87289331 | 87289436 |
| chr10 | 87290431 | 87290666 |
| chr10 | 87290721 | 87290986 |
| chr10 | 87302311 | 87302426 |
| chr10 | 87784541 | 87784656 |
| chr10 | 88012491 | 88012606 |
| chr10 | 88033231 | 88033336 |
| chr10 | 88034801 | 88035046 |
| chr10 | 88579111 | 88579226 |
| chr10 | 88599201 | 88599346 |
| chr10 | 88599971 | 88600116 |
| chr10 | 88862641 | 88862766 |
| chr10 | 88864401 | 88864696 |
| chr10 | 88864771 | 88864896 |
| chr10 | 88864931 | 88865056 |
| chr10 | 88865301 | 88865546 |
| chr10 | 88869191 | 88869296 |
| chr10 | 88869401 | 88869516 |
| chr10 | 89360991 | 89361096 |
| chr10 | 89927821 | 89927946 |
| chr10 | 90006241 | 90006876 |
| chr10 | 90127131 | 90127316 |

|       |          |          |
|-------|----------|----------|
| chr10 | 90201521 | 90201626 |
| chr10 | 90240081 | 90240196 |
| chr10 | 90248551 | 90248706 |
| chr10 | 90364581 | 90364766 |
| chr10 | 90679581 | 90679906 |
| chr10 | 90756671 | 90756796 |
| chr10 | 90865851 | 90866076 |
| chr10 | 90877951 | 90878096 |
| chr10 | 90892241 | 90892486 |
| chr10 | 91143491 | 91143656 |
| chr10 | 91436471 | 91436576 |
| chr10 | 91521601 | 91521736 |
| chr10 | 91533901 | 91534046 |
| chr10 | 91578331 | 91578506 |
| chr10 | 91591451 | 91591606 |
| chr10 | 91592361 | 91592836 |
| chr10 | 91592871 | 91593026 |
| chr10 | 91593661 | 91593786 |
| chr10 | 91594891 | 91595016 |
| chr10 | 91669471 | 91669646 |
| chr10 | 91723091 | 91723346 |
| chr10 | 91742161 | 91742226 |
| chr10 | 91744591 | 91744796 |
| chr10 | 91763801 | 91763966 |
| chr10 | 91986161 | 91986346 |
| chr10 | 91986601 | 91986776 |
| chr10 | 92025431 | 92025506 |
| chr10 | 92552411 | 92552606 |
| chr10 | 92573271 | 92573396 |
| chr10 | 92592921 | 92593056 |
| chr10 | 92598191 | 92598356 |
| chr10 | 92622701 | 92622826 |
| chr10 | 92636481 | 92636636 |
| chr10 | 92638021 | 92638106 |
| chr10 | 92861461 | 92861576 |
| chr10 | 92877421 | 92877526 |
| chr10 | 92882101 | 92882326 |
| chr10 | 92968731 | 92968906 |
| chr10 | 92997281 | 92997426 |
| chr10 | 93053731 | 93053856 |
| chr10 | 93125061 | 93125206 |
| chr10 | 93137071 | 93137226 |
| chr10 | 93201751 | 93202216 |
| chr10 | 93206701 | 93206816 |
| chr10 | 93240361 | 93240486 |
| chr10 | 93375671 | 93375796 |
| chr10 | 93399141 | 93399256 |
| chr10 | 93399321 | 93399476 |
| chr10 | 93468131 | 93468306 |
| chr10 | 93597231 | 93597326 |
| chr10 | 93650421 | 93650536 |
| chr10 | 93660391 | 93660746 |
| chr10 | 93664781 | 93665106 |



|       |          |          |
|-------|----------|----------|
| chr10 | 93872281 | 93872446 |
| chr10 | 93878021 | 93878176 |
| chr10 | 93930111 | 93930316 |
| chr10 | 93953651 | 93953826 |
| chr10 | 93954481 | 93954606 |
| chr10 | 93974701 | 93974926 |
| chr10 | 93975441 | 93975716 |
| chr10 | 93976581 | 93976716 |
| chr10 | 93989451 | 93989626 |
| chr10 | 94051381 | 94051506 |
| chr10 | 94051931 | 94052106 |
| chr10 | 94061601 | 94061776 |
| chr10 | 94297001 | 94297086 |
| chr10 | 94370551 | 94370876 |
| chr10 | 94383061 | 94383176 |
| chr10 | 94572711 | 94572826 |
| chr10 | 94600791 | 94600926 |
| chr10 | 94605161 | 94605346 |
| chr10 | 94619341 | 94619966 |
| chr10 | 94648521 | 94648636 |
| chr10 | 94669511 | 94669636 |
| chr10 | 94684121 | 94684326 |
| chr10 | 94686041 | 94686186 |
| chr10 | 94732051 | 94732166 |
| chr10 | 94740491 | 94740606 |
| chr10 | 94743781 | 94744076 |
| chr10 | 94745411 | 94745796 |
| chr10 | 94752691 | 94752806 |
| chr10 | 94785521 | 94785656 |
| chr10 | 94793261 | 94793386 |
| chr10 | 94985941 | 94986136 |
| chr10 | 95006941 | 95007076 |
| chr10 | 95027111 | 95027286 |
| chr10 | 95035031 | 95035206 |
| chr10 | 95038301 | 95038416 |
| chr10 | 95041101 | 95041256 |
| chr10 | 95047951 | 95048116 |
| chr10 | 95048191 | 95048336 |
| chr10 | 95049241 | 95049576 |
| chr10 | 95053691 | 95053856 |
| chr10 | 95112591 | 95112856 |
| chr10 | 95144251 | 95144416 |
| chr10 | 95159671 | 95159856 |
| chr10 | 95311861 | 95311976 |
| chr10 | 95321891 | 95322026 |
| chr10 | 95953691 | 95953966 |
| chr10 | 95954201 | 95954316 |
| chr10 | 95965141 | 95965316 |
| chr10 | 96076211 | 96076466 |
| chr10 | 96173961 | 96174126 |
| chr10 | 96185391 | 96185606 |
| chr10 | 96186421 | 96186516 |
| chr10 | 96255981 | 96256126 |

|       |           |           |
|-------|-----------|-----------|
| chr10 | 96385461  | 96385546  |
| chr10 | 96385661  | 96385786  |
| chr10 | 96650021  | 96650146  |
| chr10 | 96900751  | 96900846  |
| chr10 | 96909161  | 96909366  |
| chr10 | 97687821  | 97687966  |
| chr10 | 97848081  | 97848306  |
| chr10 | 97973681  | 97973836  |
| chr10 | 98040281  | 98040436  |
| chr10 | 98114121  | 98114216  |
| chr10 | 98172501  | 98172606  |
| chr10 | 98174011  | 98174146  |
| chr10 | 98181421  | 98181526  |
| chr10 | 98219541  | 98219716  |
| chr10 | 98230621  | 98230876  |
| chr10 | 98238901  | 98239006  |
| chr10 | 98261291  | 98261486  |
| chr10 | 98270491  | 98270656  |
| chr10 | 98333821  | 98333916  |
| chr10 | 98359891  | 98360056  |
| chr10 | 98396441  | 98396586  |
| chr10 | 98405631  | 98405746  |
| chr10 | 98466151  | 98466306  |
| chr10 | 98545221  | 98545586  |
| chr10 | 98545801  | 98546006  |
| chr10 | 98601721  | 98602156  |
| chr10 | 98626381  | 98626546  |
| chr10 | 98632151  | 98632466  |
| chr10 | 98659111  | 98659276  |
| chr10 | 98698171  | 98698276  |
| chr10 | 98698421  | 98698886  |
| chr10 | 98716811  | 98716946  |
| chr10 | 98717811  | 98717926  |
| chr10 | 98729191  | 98729326  |
| chr10 | 98740371  | 98740516  |
| chr10 | 98740691  | 98740796  |
| chr10 | 98871691  | 98872036  |
| chr10 | 98881761  | 98881866  |
| chr10 | 98986171  | 98986346  |
| chr10 | 99010071  | 99010136  |
| chr10 | 99061441  | 99061756  |
| chr10 | 99241911  | 99242046  |
| chr10 | 99275661  | 99275886  |
| chr10 | 99338161  | 99338276  |
| chr10 | 99342901  | 99343006  |
| chr10 | 99371291  | 99371786  |
| chr10 | 99382311  | 99382476  |
| chr10 | 99447431  | 99447616  |
| chr10 | 99480171  | 99480296  |
| chr10 | 99558041  | 99558336  |
| chr10 | 99558361  | 99558506  |
| chr10 | 101588531 | 101588916 |
| chr10 | 102430721 | 102430926 |

|       |           |           |
|-------|-----------|-----------|
| chr10 | 102586281 | 102586446 |
| chr10 | 102827371 | 102827516 |
| chr10 | 103860411 | 103860526 |
| chr10 | 104065861 | 104065996 |
| chr10 | 104419141 | 104419316 |
| chr10 | 104424371 | 104424496 |
| chr10 | 104425021 | 104425326 |
| chr10 | 104605781 | 104605976 |
| chr10 | 104852101 | 104852266 |
| chr10 | 104878811 | 104878936 |
| chr10 | 104905861 | 104906036 |
| chr10 | 104935621 | 104935796 |
| chr10 | 104935831 | 104935916 |
| chr10 | 105011611 | 105011776 |
| chr10 | 105013741 | 105013836 |
| chr10 | 105042811 | 105043066 |
| chr10 | 105043081 | 105043266 |
| chr10 | 105093161 | 105093286 |
| chr10 | 105093541 | 105093706 |
| chr10 | 105386911 | 105387046 |
| chr10 | 106014041 | 106014136 |
| chr10 | 106036491 | 106036606 |
| chr10 | 106967071 | 106967406 |
| chr10 | 107373991 | 107374086 |
| chr10 | 107466551 | 107466666 |
| chr10 | 107466781 | 107466956 |
| chr10 | 107471871 | 107472176 |
| chr10 | 107695951 | 107696156 |
| chr10 | 107717971 | 107718106 |
| chr10 | 107765071 | 107765226 |
| chr10 | 107794191 | 107794336 |
| chr10 | 107809321 | 107809476 |
| chr10 | 107810121 | 107810316 |
| chr10 | 107836311 | 107836496 |
| chr10 | 107838151 | 107838296 |
| chr10 | 107840521 | 107840616 |
| chr10 | 107841661 | 107841786 |
| chr10 | 107888101 | 107888196 |
| chr10 | 107923221 | 107923326 |
| chr10 | 107924251 | 107924356 |
| chr10 | 107939821 | 107940026 |
| chr10 | 107940901 | 107941026 |
| chr10 | 107942811 | 107942916 |
| chr10 | 107963361 | 107963636 |
| chr10 | 107973611 | 107973746 |
| chr10 | 107973871 | 107974026 |
| chr10 | 107985781 | 107985936 |
| chr10 | 107987791 | 107988046 |
| chr10 | 107988071 | 107988206 |
| chr10 | 108000441 | 108000596 |
| chr10 | 108030601 | 108030686 |
| chr10 | 108057051 | 108057306 |
| chr10 | 108105521 | 108105636 |

|       |           |           |
|-------|-----------|-----------|
| chr10 | 108105691 | 108105776 |
| chr10 | 108133241 | 108133366 |
| chr10 | 108138451 | 108138536 |
| chr10 | 108181021 | 108181146 |
| chr10 | 108306521 | 108306676 |
| chr10 | 108313851 | 108313986 |
| chr10 | 108364921 | 108365026 |
| chr10 | 109042871 | 109043016 |
| chr10 | 109089001 | 109089126 |
| chr10 | 109250901 | 109251146 |
| chr10 | 109888951 | 109889126 |
| chr10 | 109938811 | 109938956 |
| chr10 | 110014631 | 110014756 |
| chr10 | 110283641 | 110283796 |
| chr10 | 110323151 | 110323246 |
| chr10 | 110331561 | 110331716 |
| chr10 | 110335901 | 110336226 |
| chr10 | 110399031 | 110399306 |
| chr10 | 110409941 | 110410146 |
| chr10 | 110410361 | 110410526 |
| chr10 | 110477461 | 110477586 |
| chr10 | 110477591 | 110477726 |
| chr10 | 110675831 | 110675976 |
| chr10 | 110928191 | 110928436 |
| chr10 | 110938351 | 110938526 |
| chr10 | 110980751 | 110980886 |
| chr10 | 110984531 | 110984766 |
| chr10 | 110985261 | 110985376 |
| chr10 | 110986141 | 110986306 |
| chr10 | 110986531 | 110986706 |
| chr10 | 111017551 | 111017656 |
| chr10 | 111035941 | 111036196 |
| chr10 | 111088651 | 111088766 |
| chr10 | 111246501 | 111246676 |
| chr10 | 111247131 | 111247306 |
| chr10 | 111247951 | 111248076 |
| chr10 | 111248931 | 111249336 |
| chr10 | 111271371 | 111271496 |
| chr10 | 111719361 | 111719646 |
| chr10 | 112231701 | 112231826 |
| chr10 | 112239951 | 112240076 |
| chr10 | 112288251 | 112288426 |
| chr10 | 113552801 | 113552946 |
| chr10 | 114102881 | 114103096 |
| chr10 | 114103791 | 114103966 |
| chr10 | 114345161 | 114345256 |
| chr10 | 114521821 | 114522006 |
| chr10 | 114530041 | 114530176 |
| chr10 | 114530191 | 114530396 |
| chr10 | 114573631 | 114573986 |
| chr10 | 114579921 | 114580096 |
| chr10 | 114924741 | 114924936 |
| chr10 | 114961171 | 114961326 |

|       |           |           |
|-------|-----------|-----------|
| chr10 | 114964981 | 114965076 |
| chr10 | 114975471 | 114975716 |
| chr10 | 114983741 | 114983936 |
| chr10 | 114996031 | 114996176 |
| chr10 | 115085271 | 115085426 |
| chr10 | 115120621 | 115120996 |
| chr10 | 115221231 | 115221336 |
| chr10 | 115251161 | 115251426 |
| chr10 | 115292431 | 115292586 |
| chr10 | 115305411 | 115305616 |
| chr10 | 115581991 | 115582246 |
| chr10 | 115598681 | 115598876 |
| chr10 | 115735401 | 115735526 |
| chr10 | 115754741 | 115754906 |
| chr10 | 115762841 | 115763256 |
| chr10 | 115787221 | 115787516 |
| chr10 | 115787651 | 115787776 |
| chr10 | 115911141 | 115911316 |
| chr10 | 115913151 | 115913256 |
| chr10 | 115933931 | 115934146 |
| chr10 | 116135791 | 116135896 |
| chr10 | 116323051 | 116323196 |
| chr10 | 116349371 | 116349556 |
| chr10 | 116418081 | 116418366 |
| chr10 | 116425201 | 116425576 |
| chr10 | 116427831 | 116428046 |
| chr10 | 116499061 | 116499226 |
| chr10 | 116510921 | 116511086 |
| chr10 | 116528861 | 116528966 |
| chr10 | 116546361 | 116546596 |
| chr10 | 116571241 | 116571516 |
| chr10 | 116575931 | 116576066 |
| chr10 | 116589541 | 116589686 |
| chr10 | 116797271 | 116797626 |
| chr10 | 116797691 | 116797816 |
| chr10 | 116813601 | 116813746 |
| chr10 | 116813781 | 116813886 |
| chr10 | 116839291 | 116839386 |
| chr10 | 116875931 | 116876086 |
| chr10 | 116907551 | 116907856 |
| chr10 | 116921761 | 116921926 |
| chr10 | 116923021 | 116923126 |
| chr10 | 116958801 | 116958986 |
| chr10 | 116964001 | 116964326 |
| chr10 | 116979741 | 116979896 |
| chr10 | 116987751 | 116987876 |
| chr10 | 117317811 | 117317926 |
| chr10 | 117350261 | 117350416 |
| chr10 | 117459761 | 117460056 |
| chr10 | 117509821 | 117510026 |
| chr10 | 117510111 | 117510306 |
| chr10 | 117513421 | 117513676 |
| chr10 | 117514671 | 117514846 |

|       |           |           |
|-------|-----------|-----------|
| chr10 | 117516301 | 117516446 |
| chr10 | 117550041 | 117550296 |
| chr10 | 117572311 | 117572596 |
| chr10 | 117598941 | 117599076 |
| chr10 | 117909201 | 117909376 |
| chr10 | 118079201 | 118079386 |
| chr10 | 118414171 | 118414326 |
| chr10 | 118452171 | 118452316 |
| chr10 | 118479061 | 118479336 |
| chr10 | 118479381 | 118479576 |
| chr10 | 118517801 | 118517996 |
| chr10 | 118771681 | 118771816 |
| chr10 | 118814151 | 118814316 |
| chr10 | 118840171 | 118840376 |
| chr10 | 118845111 | 118845326 |
| chr10 | 118931671 | 118931806 |
| chr10 | 118932371 | 118932546 |
| chr10 | 119034491 | 119034826 |
| chr10 | 119040131 | 119040256 |
| chr10 | 119069361 | 119069516 |
| chr10 | 119073541 | 119073726 |
| chr10 | 119115441 | 119115576 |
| chr10 | 119127721 | 119127846 |
| chr10 | 119128011 | 119128176 |
| chr10 | 119132821 | 119132986 |
| chr10 | 119133111 | 119133226 |
| chr10 | 119141101 | 119141266 |
| chr10 | 119194611 | 119194736 |
| chr10 | 119208821 | 119209036 |
| chr10 | 119209261 | 119209556 |
| chr10 | 119222411 | 119222616 |
| chr10 | 119226841 | 119227006 |
| chr10 | 119227641 | 119227836 |
| chr10 | 119235661 | 119235756 |
| chr10 | 119237531 | 119237706 |
| chr10 | 119281471 | 119281806 |
| chr10 | 119353451 | 119353736 |
| chr10 | 119438801 | 119439126 |
| chr10 | 119454291 | 119454396 |
| chr10 | 119463701 | 119463866 |
| chr10 | 119622131 | 119622396 |
| chr10 | 119662391 | 119662516 |
| chr10 | 119697791 | 119697926 |
| chr10 | 119711981 | 119712116 |
| chr10 | 119719991 | 119720166 |
| chr10 | 119759981 | 119760116 |
| chr10 | 119772231 | 119772506 |
| chr10 | 119772771 | 119772926 |
| chr10 | 119788151 | 119788286 |
| chr10 | 119791561 | 119791786 |
| chr10 | 119791881 | 119792106 |
| chr10 | 119794401 | 119794816 |
| chr10 | 119800481 | 119800716 |

|       |           |           |
|-------|-----------|-----------|
| chr10 | 119801721 | 119801806 |
| chr10 | 119801831 | 119801986 |
| chr10 | 119805031 | 119805106 |
| chr10 | 119810341 | 119810546 |
| chr10 | 119820161 | 119820326 |
| chr10 | 119820881 | 119820996 |
| chr10 | 119821001 | 119821166 |
| chr10 | 119822341 | 119822596 |
| chr10 | 119824171 | 119824286 |
| chr10 | 119835341 | 119835466 |
| chr10 | 119835831 | 119835966 |
| chr10 | 119839351 | 119839486 |
| chr10 | 119844431 | 119844616 |
| chr10 | 119852861 | 119852986 |
| chr10 | 119912971 | 119913076 |
| chr10 | 119976211 | 119976376 |
| chr10 | 120043901 | 120043966 |
| chr10 | 120050181 | 120050296 |
| chr10 | 120053341 | 120053436 |
| chr10 | 120089561 | 120089626 |
| chr10 | 120120191 | 120120336 |
| chr10 | 120124141 | 120124286 |
| chr10 | 120125371 | 120125536 |
| chr10 | 120147611 | 120147876 |
| chr10 | 120190211 | 120190326 |
| chr10 | 120190501 | 120190626 |
| chr10 | 120197721 | 120197836 |
| chr10 | 120275271 | 120275466 |
| chr10 | 120275531 | 120275746 |
| chr10 | 120321071 | 120321206 |
| chr10 | 120458631 | 120458766 |
| chr10 | 120609041 | 120609186 |
| chr10 | 120609391 | 120609566 |
| chr10 | 120694031 | 120694126 |
| chr10 | 120821201 | 120821336 |
| chr10 | 120838961 | 120839126 |
| chr10 | 120839271 | 120839546 |
| chr10 | 120839581 | 120839726 |
| chr10 | 120844511 | 120844726 |
| chr10 | 120864631 | 120864796 |
| chr10 | 120868291 | 120868406 |
| chr10 | 120908151 | 120908376 |
| chr10 | 120924261 | 120924516 |
| chr10 | 120924661 | 120924806 |
| chr10 | 121231731 | 121231856 |
| chr10 | 121282021 | 121282126 |
| chr10 | 121285641 | 121285796 |
| chr10 | 121373901 | 121374106 |
| chr10 | 121662551 | 121662666 |
| chr10 | 121967231 | 121967356 |
| chr10 | 121973951 | 121974126 |
| chr10 | 121974161 | 121974486 |
| chr10 | 122003831 | 122004066 |

|       |           |           |
|-------|-----------|-----------|
| chr10 | 122022741 | 122022936 |
| chr10 | 122022951 | 122023126 |
| chr10 | 122171741 | 122171976 |
| chr10 | 122173561 | 122173696 |
| chr10 | 122230871 | 122231036 |
| chr10 | 122265251 | 122265516 |
| chr10 | 122265811 | 122265946 |
| chr10 | 122286881 | 122286986 |
| chr10 | 122290481 | 122290626 |
| chr10 | 122313791 | 122313916 |
| chr10 | 122354271 | 122354406 |
| chr10 | 122365641 | 122365736 |
| chr10 | 122366761 | 122366926 |
| chr10 | 122550161 | 122550606 |
| chr10 | 123279111 | 123279226 |
| chr10 | 123493641 | 123493806 |
| chr10 | 123741831 | 123741966 |
| chr10 | 124731471 | 124731566 |
| chr10 | 125026861 | 125026966 |
| chr10 | 125027161 | 125027256 |
| chr10 | 125076501 | 125076916 |
| chr10 | 125188411 | 125188646 |
| chr10 | 125189791 | 125190186 |
| chr10 | 125248031 | 125248456 |
| chr10 | 125320421 | 125320546 |
| chr10 | 125341501 | 125341726 |
| chr10 | 125351501 | 125351636 |
| chr10 | 125373561 | 125373726 |
| chr10 | 125381771 | 125381956 |
| chr10 | 125405671 | 125405856 |
| chr10 | 125405861 | 125406066 |
| chr10 | 125406201 | 125406386 |
| chr10 | 125422741 | 125422856 |
| chr10 | 125722791 | 125722996 |
| chr10 | 125772541 | 125772706 |
| chr10 | 126094441 | 126094536 |
| chr10 | 126151701 | 126151886 |
| chr10 | 126152061 | 126152166 |
| chr10 | 126159021 | 126159176 |
| chr10 | 126238021 | 126238376 |
| chr10 | 126248411 | 126248506 |
| chr10 | 126352711 | 126352856 |
| chr10 | 126360751 | 126360896 |
| chr10 | 126360901 | 126361006 |
| chr10 | 126639751 | 126639876 |
| chr10 | 126771301 | 126771466 |
| chr10 | 126771831 | 126771966 |
| chr10 | 126772111 | 126772346 |
| chr10 | 126799471 | 126799656 |
| chr10 | 126823241 | 126823396 |
| chr10 | 126824111 | 126824266 |
| chr10 | 126913171 | 126913266 |
| chr10 | 126920991 | 126921116 |



|       |           |           |
|-------|-----------|-----------|
| chr10 | 126930541 | 126930756 |
| chr10 | 126994491 | 126995156 |
| chr10 | 127001581 | 127001856 |
| chr10 | 127002661 | 127002826 |
| chr10 | 127019341 | 127019546 |
| chr10 | 127021171 | 127021316 |
| chr10 | 127065691 | 127065786 |
| chr10 | 127166721 | 127166826 |
| chr10 | 127388761 | 127388926 |
| chr10 | 127583081 | 127583246 |
| chr10 | 127637361 | 127637596 |
| chr10 | 128148361 | 128148496 |
| chr10 | 129647341 | 129647496 |
| chr17 | 3203631   | 3203826   |
| chr17 | 3203861   | 3204066   |
| chr17 | 3363441   | 3363576   |
| chr17 | 3371201   | 3371306   |
| chr17 | 3444561   | 3444726   |
| chr17 | 3473041   | 3473136   |
| chr17 | 3473241   | 3473396   |
| chr17 | 3522491   | 3522706   |
| chr17 | 3566791   | 3566916   |
| chr17 | 3567491   | 3567786   |
| chr17 | 4153341   | 4153456   |
| chr17 | 4153471   | 4153596   |
| chr17 | 4159681   | 4159856   |
| chr17 | 4455061   | 4455146   |
| chr17 | 4947391   | 4947536   |
| chr17 | 4958431   | 4958586   |
| chr17 | 4965801   | 4965966   |
| chr17 | 4977201   | 4977356   |
| chr17 | 5013861   | 5014116   |
| chr17 | 5015911   | 5015996   |
| chr17 | 5046951   | 5047226   |
| chr17 | 5048601   | 5048796   |
| chr17 | 5141211   | 5141396   |
| chr17 | 5163261   | 5163546   |
| chr17 | 5168951   | 5169136   |
| chr17 | 5179471   | 5179586   |
| chr17 | 5204431   | 5204626   |
| chr17 | 5205281   | 5205456   |
| chr17 | 5205531   | 5205746   |
| chr17 | 5205901   | 5206016   |
| chr17 | 5207101   | 5207336   |
| chr17 | 5218801   | 5219036   |
| chr17 | 5259861   | 5260016   |
| chr17 | 5279661   | 5279846   |
| chr17 | 5280681   | 5280916   |
| chr17 | 5286391   | 5286506   |
| chr17 | 5322571   | 5322716   |
| chr17 | 5786281   | 5786386   |
| chr17 | 5892611   | 5892726   |
| chr17 | 5921561   | 5921806   |

|       |          |          |
|-------|----------|----------|
| chr17 | 5921821  | 5921936  |
| chr17 | 5932331  | 5932426  |
| chr17 | 6079351  | 6079456  |
| chr17 | 6159671  | 6159796  |
| chr17 | 6406351  | 6406526  |
| chr17 | 6597191  | 6597306  |
| chr17 | 6616771  | 6616896  |
| chr17 | 6997741  | 6997846  |
| chr17 | 7023311  | 7023576  |
| chr17 | 7047581  | 7047646  |
| chr17 | 7093891  | 7093986  |
| chr17 | 7108721  | 7108916  |
| chr17 | 7109131  | 7109246  |
| chr17 | 7110001  | 7110556  |
| chr17 | 7111711  | 7111966  |
| chr17 | 7122851  | 7123076  |
| chr17 | 7367571  | 7367726  |
| chr17 | 7530031  | 7530166  |
| chr17 | 7530471  | 7530606  |
| chr17 | 8009341  | 8009496  |
| chr17 | 8285981  | 8286136  |
| chr17 | 8286181  | 8286426  |
| chr17 | 8318891  | 8319046  |
| chr17 | 8346421  | 8346606  |
| chr17 | 8526151  | 8526246  |
| chr17 | 8710231  | 8710716  |
| chr17 | 8714631  | 8714766  |
| chr17 | 8794391  | 8794506  |
| chr17 | 8799831  | 8800116  |
| chr17 | 9475741  | 9475826  |
| chr17 | 9476411  | 9476546  |
| chr17 | 9565691  | 9565896  |
| chr17 | 9595151  | 9595306  |
| chr17 | 9728711  | 9728866  |
| chr17 | 9741451  | 9741546  |
| chr17 | 9855151  | 9855286  |
| chr17 | 9881381  | 9881586  |
| chr17 | 9925031  | 9925156  |
| chr17 | 9990641  | 9990806  |
| chr17 | 10052771 | 10052976 |
| chr17 | 10166371 | 10166516 |
| chr17 | 10317521 | 10317626 |
| chr17 | 10317641 | 10317736 |
| chr17 | 10320461 | 10320636 |
| chr17 | 10357561 | 10357666 |
| chr17 | 10360911 | 10361036 |
| chr17 | 10613241 | 10613406 |
| chr17 | 10619921 | 10620076 |
| chr17 | 10620111 | 10620286 |
| chr17 | 10802571 | 10802786 |
| chr17 | 10919841 | 10920016 |
| chr17 | 11092461 | 11092606 |
| chr17 | 11105451 | 11105586 |

|       |          |          |
|-------|----------|----------|
| chr17 | 11145041 | 11145166 |
| chr17 | 11151921 | 11152006 |
| chr17 | 11236051 | 11236246 |
| chr17 | 11236321 | 11236556 |
| chr17 | 11254791 | 11254926 |
| chr17 | 11254951 | 11255096 |
| chr17 | 11264301 | 11264506 |
| chr17 | 11543971 | 11544126 |
| chr17 | 11710441 | 11710566 |
| chr17 | 11770481 | 11770596 |
| chr17 | 11806351 | 11806566 |
| chr17 | 11819621 | 11819746 |
| chr17 | 11819971 | 11820076 |
| chr17 | 11873091 | 11873436 |
| chr17 | 11873641 | 11873796 |
| chr17 | 11878891 | 11878986 |
| chr17 | 12012841 | 12013036 |
| chr17 | 12018351 | 12018516 |
| chr17 | 12019241 | 12019356 |
| chr17 | 12046991 | 12047226 |
| chr17 | 12124181 | 12124316 |
| chr17 | 12258891 | 12259086 |
| chr17 | 12259321 | 12259446 |
| chr17 | 12296651 | 12296806 |
| chr17 | 12567331 | 12567496 |
| chr17 | 12603181 | 12603266 |
| chr17 | 12623551 | 12623676 |
| chr17 | 12633481 | 12633716 |
| chr17 | 12644901 | 12645166 |
| chr17 | 13429291 | 13429426 |
| chr17 | 13436061 | 13436246 |
| chr17 | 13604021 | 13604306 |
| chr17 | 13635541 | 13635666 |
| chr17 | 13894641 | 13894806 |
| chr17 | 13900331 | 13900546 |
| chr17 | 13906141 | 13906286 |
| chr17 | 13907621 | 13907766 |
| chr17 | 13914771 | 13915036 |
| chr17 | 13915101 | 13915226 |
| chr17 | 13929671 | 13929766 |
| chr17 | 13936371 | 13936486 |
| chr17 | 13967571 | 13968036 |
| chr17 | 14233861 | 14233976 |
| chr17 | 14252551 | 14252676 |
| chr17 | 14277051 | 14277186 |
| chr17 | 14501551 | 14501696 |
| chr17 | 14785631 | 14785836 |
| chr17 | 14813611 | 14813736 |
| chr17 | 14813841 | 14814046 |
| chr17 | 14885521 | 14885776 |
| chr17 | 14897881 | 14897996 |
| chr17 | 14900081 | 14900246 |
| chr17 | 14900271 | 14900416 |

|       |          |          |
|-------|----------|----------|
| chr17 | 14908551 | 14908686 |
| chr17 | 15047721 | 15047846 |
| chr17 | 15048051 | 15048166 |
| chr17 | 15288731 | 15288896 |
| chr17 | 15357421 | 15357526 |
| chr17 | 15512261 | 15512436 |
| chr17 | 15525321 | 15525486 |
| chr17 | 15527941 | 15528036 |
| chr17 | 15709601 | 15709776 |
| chr17 | 17534821 | 17534916 |
| chr17 | 23355391 | 23355876 |
| chr17 | 23412071 | 23412226 |
| chr17 | 23889241 | 23889376 |
| chr17 | 24493111 | 24493286 |
| chr17 | 25289261 | 25289446 |
| chr17 | 25443431 | 25443576 |
| chr17 | 25566131 | 25566256 |
| chr17 | 25609531 | 25609696 |
| chr17 | 25623751 | 25623846 |
| chr17 | 25780451 | 25780556 |
| chr17 | 26126221 | 26126316 |
| chr17 | 26161011 | 26161166 |
| chr17 | 26269891 | 26270026 |
| chr17 | 26292241 | 26292396 |
| chr17 | 26312271 | 26312386 |
| chr17 | 26346321 | 26346446 |
| chr17 | 26374891 | 26375056 |
| chr17 | 26386501 | 26386726 |
| chr17 | 26414781 | 26414936 |
| chr17 | 26421801 | 26422066 |
| chr17 | 26442071 | 26442286 |
| chr17 | 26451921 | 26452056 |
| chr17 | 26570951 | 26571186 |
| chr17 | 26696421 | 26696586 |
| chr17 | 26801751 | 26801906 |
| chr17 | 26874051 | 26874286 |
| chr17 | 26903031 | 26903296 |
| chr17 | 26915961 | 26916216 |
| chr17 | 26934741 | 26934856 |
| chr17 | 26939671 | 26939836 |
| chr17 | 26970351 | 26970486 |
| chr17 | 27128791 | 27128876 |
| chr17 | 27159761 | 27160016 |
| chr17 | 27163361 | 27163526 |
| chr17 | 27208201 | 27208366 |
| chr17 | 27208461 | 27208566 |
| chr17 | 27225891 | 27226086 |
| chr17 | 27280401 | 27280556 |
| chr17 | 27314391 | 27314546 |
| chr17 | 27324201 | 27324496 |
| chr17 | 27331551 | 27331766 |
| chr17 | 27363811 | 27364096 |
| chr17 | 27370321 | 27370476 |

|       |          |          |
|-------|----------|----------|
| chr17 | 27436051 | 27436146 |
| chr17 | 27524971 | 27525246 |
| chr17 | 27525251 | 27525346 |
| chr17 | 27527721 | 27527886 |
| chr17 | 27735671 | 27735966 |
| chr17 | 27759321 | 27759556 |
| chr17 | 27760561 | 27760756 |
| chr17 | 27810421 | 27810606 |
| chr17 | 27810651 | 27810946 |
| chr17 | 27813951 | 27814356 |
| chr17 | 27829521 | 27829626 |
| chr17 | 27856541 | 27856656 |
| chr17 | 27859651 | 27859806 |
| chr17 | 27866161 | 27866416 |
| chr17 | 27925291 | 27925466 |
| chr17 | 27981791 | 27981896 |
| chr17 | 28018371 | 28018576 |
| chr17 | 28079951 | 28080116 |
| chr17 | 28424951 | 28425076 |
| chr17 | 28583211 | 28583376 |
| chr17 | 28625961 | 28626136 |
| chr17 | 28626171 | 28626326 |
| chr17 | 28710191 | 28710356 |
| chr17 | 28719761 | 28719886 |
| chr17 | 28752801 | 28752956 |
| chr17 | 28752991 | 28753176 |
| chr17 | 28940651 | 28940746 |
| chr17 | 29111051 | 29111206 |
| chr17 | 29155411 | 29155556 |
| chr17 | 29165321 | 29165466 |
| chr17 | 29172291 | 29172416 |
| chr17 | 29189371 | 29189526 |
| chr17 | 29193171 | 29193336 |
| chr17 | 29208101 | 29208256 |
| chr17 | 29372481 | 29372626 |
| chr17 | 29536341 | 29536486 |
| chr17 | 29544291 | 29544396 |
| chr17 | 29544481 | 29544706 |
| chr17 | 29545281 | 29545396 |
| chr17 | 29563831 | 29564026 |
| chr17 | 29699001 | 29699176 |
| chr17 | 29714021 | 29714136 |
| chr17 | 29715281 | 29715376 |
| chr17 | 29746471 | 29746606 |
| chr17 | 29752511 | 29752666 |
| chr17 | 29791061 | 29791216 |
| chr17 | 29791951 | 29792046 |
| chr17 | 29803931 | 29804006 |
| chr17 | 29830961 | 29831086 |
| chr17 | 29837671 | 29837766 |
| chr17 | 29843981 | 29844166 |
| chr17 | 29862351 | 29862486 |
| chr17 | 29877131 | 29877246 |

|       |          |          |
|-------|----------|----------|
| chr17 | 29886401 | 29886556 |
| chr17 | 29888181 | 29888446 |
| chr17 | 29914881 | 29915026 |
| chr17 | 29915101 | 29915306 |
| chr17 | 29915351 | 29915466 |
| chr17 | 30005741 | 30006276 |
| chr17 | 30046331 | 30046536 |
| chr17 | 30067571 | 30067686 |
| chr17 | 30074121 | 30074306 |
| chr17 | 30181331 | 30181486 |
| chr17 | 30183771 | 30183886 |
| chr17 | 30184401 | 30184496 |
| chr17 | 30195651 | 30195756 |
| chr17 | 30197381 | 30197596 |
| chr17 | 30197841 | 30198066 |
| chr17 | 30287581 | 30287696 |
| chr17 | 30297261 | 30297586 |
| chr17 | 30304251 | 30304396 |
| chr17 | 30321481 | 30321696 |
| chr17 | 30321811 | 30321966 |
| chr17 | 30336301 | 30336426 |
| chr17 | 30469151 | 30469426 |
| chr17 | 30531831 | 30531946 |
| chr17 | 30532051 | 30532356 |
| chr17 | 30552731 | 30552866 |
| chr17 | 30556491 | 30556586 |
| chr17 | 30585701 | 30585946 |
| chr17 | 30589681 | 30589816 |
| chr17 | 30605721 | 30605896 |
| chr17 | 30605991 | 30606146 |
| chr17 | 30618931 | 30619116 |
| chr17 | 30638531 | 30638916 |
| chr17 | 30639781 | 30639956 |
| chr17 | 30640021 | 30640296 |
| chr17 | 30642081 | 30642216 |
| chr17 | 30991221 | 30991376 |
| chr17 | 31041391 | 31041506 |
| chr17 | 31134031 | 31134226 |
| chr17 | 31138581 | 31138676 |
| chr17 | 31138811 | 31138936 |
| chr17 | 31161871 | 31162326 |
| chr17 | 31165131 | 31165266 |
| chr17 | 31185971 | 31186116 |
| chr17 | 31272401 | 31272566 |
| chr17 | 31278141 | 31278296 |
| chr17 | 31283831 | 31283946 |
| chr17 | 31284021 | 31284106 |
| chr17 | 31388001 | 31388136 |
| chr17 | 31398851 | 31399066 |
| chr17 | 31422281 | 31422426 |
| chr17 | 31495701 | 31495806 |
| chr17 | 31754031 | 31754236 |
| chr17 | 33647221 | 33647336 |

|       |          |          |
|-------|----------|----------|
| chr17 | 34805211 | 34805326 |
| chr17 | 34852071 | 34852176 |
| chr17 | 35151681 | 35151806 |
| chr17 | 35288791 | 35288916 |
| chr17 | 35327641 | 35327776 |
| chr17 | 35387141 | 35387246 |
| chr17 | 36535841 | 36536066 |
| chr17 | 42205411 | 42205526 |
| chr17 | 42372491 | 42372736 |
| chr17 | 42372961 | 42373226 |
| chr17 | 42454671 | 42454936 |
| chr17 | 42611841 | 42612036 |
| chr17 | 42623101 | 42623246 |
| chr17 | 42661491 | 42661626 |
| chr17 | 42790791 | 42790936 |
| chr17 | 42797311 | 42797456 |
| chr17 | 42825901 | 42826216 |
| chr17 | 42827211 | 42827416 |
| chr17 | 42856821 | 42857026 |
| chr17 | 42857041 | 42857166 |
| chr17 | 42858361 | 42858536 |
| chr17 | 42868061 | 42868196 |
| chr17 | 42868311 | 42868706 |
| chr17 | 42881681 | 42881806 |
| chr17 | 43265691 | 43265816 |
| chr17 | 43597841 | 43597976 |
| chr17 | 43648681 | 43648796 |
| chr17 | 43702601 | 43702736 |
| chr17 | 43822011 | 43822186 |
| chr17 | 43848071 | 43848236 |
| chr17 | 43906591 | 43906856 |
| chr17 | 43913231 | 43913466 |
| chr17 | 44005641 | 44005816 |
| chr17 | 44015991 | 44016206 |
| chr17 | 44112201 | 44112376 |
| chr17 | 44180471 | 44180566 |
| chr17 | 44180671 | 44181016 |
| chr17 | 44181111 | 44181306 |
| chr17 | 44181311 | 44181396 |
| chr17 | 44181701 | 44181906 |
| chr17 | 44582731 | 44582866 |
| chr17 | 44679071 | 44679166 |
| chr17 | 44743461 | 44743536 |
| chr17 | 44782191 | 44782366 |
| chr17 | 44863651 | 44863836 |
| chr17 | 45157401 | 45157526 |
| chr17 | 45313651 | 45313906 |
| chr17 | 45327851 | 45327946 |
| chr17 | 45337001 | 45337186 |
| chr17 | 45337241 | 45337406 |
| chr17 | 45349421 | 45349576 |
| chr17 | 45349961 | 45350486 |
| chr17 | 45354971 | 45355116 |

|       |          |          |
|-------|----------|----------|
| chr17 | 45360571 | 45360676 |
| chr17 | 45405691 | 45405816 |
| chr17 | 45431211 | 45431356 |
| chr17 | 45543851 | 45544056 |
| chr17 | 45544211 | 45544416 |
| chr17 | 45568301 | 45568506 |
| chr17 | 45748321 | 45748486 |
| chr17 | 46076261 | 46076376 |
| chr17 | 46080601 | 46080956 |
| chr17 | 46083161 | 46083256 |
| chr17 | 46115231 | 46115346 |
| chr17 | 46316051 | 46316236 |
| chr17 | 46337281 | 46337726 |
| chr17 | 46342991 | 46343406 |
| chr17 | 46460211 | 46460326 |
| chr17 | 46601571 | 46601726 |
| chr17 | 46628711 | 46629016 |
| chr17 | 46629761 | 46629916 |
| chr17 | 46631211 | 46631356 |
| chr17 | 46639811 | 46640016 |
| chr17 | 46642121 | 46642286 |
| chr17 | 46642321 | 46642426 |
| chr17 | 46661121 | 46661246 |
| chr17 | 46697281 | 46697416 |
| chr17 | 46739211 | 46739296 |
| chr17 | 46892141 | 46892286 |
| chr17 | 46927621 | 46927886 |
| chr17 | 46927941 | 46928106 |
| chr17 | 47013881 | 47013986 |
| chr17 | 47246971 | 47247146 |
| chr17 | 47257961 | 47258086 |
| chr17 | 47259481 | 47259796 |
| chr17 | 47274381 | 47274966 |
| chr17 | 47337781 | 47337906 |
| chr17 | 47362471 | 47362656 |
| chr17 | 47369741 | 47369956 |
| chr17 | 47369961 | 47370206 |
| chr17 | 47370321 | 47370696 |
| chr17 | 47406241 | 47406416 |
| chr17 | 47429361 | 47429566 |
| chr17 | 47453161 | 47453276 |
| chr17 | 47454051 | 47454226 |
| chr17 | 47455211 | 47455376 |
| chr17 | 47468431 | 47468556 |
| chr17 | 47471471 | 47471596 |
| chr17 | 47471601 | 47472036 |
| chr17 | 47473921 | 47474016 |
| chr17 | 47478221 | 47478426 |
| chr17 | 47501191 | 47501326 |
| chr17 | 47563431 | 47563676 |
| chr17 | 47909341 | 47909536 |
| chr17 | 48022311 | 48022516 |
| chr17 | 48028821 | 48028956 |



|       |          |          |
|-------|----------|----------|
| chr17 | 48492811 | 48492966 |
| chr17 | 49004811 | 49004936 |
| chr17 | 49147081 | 49147216 |
| chr17 | 49147601 | 49147726 |
| chr17 | 49232861 | 49233126 |
| chr17 | 49233451 | 49233546 |
| chr17 | 49242711 | 49242886 |
| chr17 | 49243031 | 49243226 |
| chr17 | 49277861 | 49277986 |
| chr17 | 49281961 | 49282136 |
| chr17 | 49437191 | 49437336 |
| chr17 | 49469831 | 49469976 |
| chr17 | 49470031 | 49470326 |
| chr17 | 49471881 | 49472206 |
| chr17 | 49480161 | 49480466 |
| chr17 | 49489991 | 49490146 |
| chr17 | 49490831 | 49490946 |
| chr17 | 49496921 | 49497086 |
| chr17 | 49500101 | 49500216 |
| chr17 | 49509281 | 49509486 |
| chr17 | 49535651 | 49535796 |
| chr17 | 49595101 | 49595206 |
| chr17 | 49595261 | 49595436 |
| chr17 | 49600991 | 49601146 |
| chr17 | 49601181 | 49601326 |
| chr17 | 49693061 | 49693206 |
| chr17 | 49712551 | 49712676 |
| chr17 | 49797441 | 49797566 |
| chr17 | 49863081 | 49863206 |
| chr17 | 49873341 | 49873466 |
| chr17 | 49935471 | 49935636 |
| chr17 | 49980891 | 49981026 |
| chr17 | 51097031 | 51097116 |
| chr17 | 51098901 | 51099056 |
| chr17 | 51549861 | 51549976 |
| chr17 | 51945121 | 51945266 |
| chr17 | 54133261 | 54133356 |
| chr17 | 54643141 | 54643236 |
| chr17 | 55497681 | 55497826 |
| chr17 | 56103591 | 56103776 |
| chr17 | 56103861 | 56103986 |
| chr17 | 56111551 | 56111646 |
| chr17 | 56499541 | 56499756 |
| chr17 | 58709471 | 58709596 |
| chr17 | 58709921 | 58710186 |
| chr17 | 59106961 | 59107126 |
| chr17 | 61159861 | 61160086 |
| chr17 | 62023991 | 62024116 |
| chr17 | 62146811 | 62146966 |
| chr17 | 62189441 | 62189606 |
| chr17 | 62341231 | 62341376 |
| chr17 | 62347501 | 62347606 |
| chr17 | 62386911 | 62387016 |

|       |          |          |
|-------|----------|----------|
| chr17 | 62394131 | 62394376 |
| chr17 | 62403361 | 62403546 |
| chr17 | 62420541 | 62420676 |
| chr17 | 62432311 | 62432736 |
| chr17 | 62432801 | 62432926 |
| chr17 | 62433211 | 62433416 |
| chr17 | 62433421 | 62433546 |
| chr17 | 62434561 | 62434756 |
| chr17 | 62504301 | 62504466 |
| chr17 | 62508071 | 62508256 |
| chr17 | 62514631 | 62514766 |
| chr17 | 62522981 | 62523126 |
| chr17 | 62530161 | 62530326 |
| chr17 | 62530671 | 62530796 |
| chr17 | 62531641 | 62531766 |
| chr17 | 62536831 | 62536976 |
| chr17 | 62557501 | 62557636 |
| chr17 | 62591011 | 62591126 |
| chr17 | 62665421 | 62665546 |
| chr17 | 62666091 | 62666286 |
| chr17 | 62731111 | 62731266 |
| chr17 | 62796571 | 62796696 |
| chr17 | 62830981 | 62831216 |
| chr17 | 62856861 | 62857026 |
| chr17 | 62870691 | 62870866 |
| chr17 | 63055331 | 63055406 |
| chr17 | 63056231 | 63056376 |
| chr17 | 63056391 | 63056526 |
| chr17 | 63145601 | 63145716 |
| chr17 | 63308051 | 63308166 |
| chr17 | 63398491 | 63398656 |
| chr17 | 63493141 | 63493276 |
| chr17 | 63496721 | 63496866 |
| chr17 | 63496971 | 63497196 |
| chr17 | 63501701 | 63501826 |
| chr17 | 63655521 | 63655656 |
| chr17 | 63885481 | 63885916 |
| chr17 | 64366131 | 64366436 |
| chr17 | 64473961 | 64474096 |
| chr17 | 64517701 | 64517836 |
| chr17 | 64727811 | 64727946 |
| chr17 | 64847361 | 64847466 |
| chr17 | 64880741 | 64880886 |
| chr17 | 64972381 | 64972566 |
| chr17 | 65086421 | 65086676 |
| chr17 | 65349881 | 65350056 |
| chr17 | 65566421 | 65566516 |
| chr17 | 65645931 | 65646036 |
| chr17 | 65688231 | 65688406 |
| chr17 | 65729011 | 65729216 |
| chr17 | 65961151 | 65961306 |
| chr17 | 66299521 | 66299656 |
| chr17 | 66306461 | 66306626 |

|       |          |          |
|-------|----------|----------|
| chr17 | 66307121 | 66307266 |
| chr17 | 66317201 | 66317556 |
| chr17 | 66317701 | 66317936 |
| chr17 | 66317971 | 66318036 |
| chr17 | 66318151 | 66318366 |
| chr17 | 66321561 | 66321686 |
| chr17 | 66321751 | 66322306 |
| chr17 | 66323591 | 66323806 |
| chr17 | 66346021 | 66346146 |
| chr17 | 66516501 | 66516626 |
| chr17 | 66666461 | 66667126 |
| chr17 | 66682531 | 66682696 |
| chr17 | 66691201 | 66691356 |
| chr17 | 67091771 | 67091946 |
| chr17 | 67148391 | 67148536 |
| chr17 | 67195851 | 67196086 |
| chr17 | 67228741 | 67228896 |
| chr17 | 67453981 | 67454186 |
| chr17 | 67454331 | 67454506 |
| chr17 | 67588281 | 67588376 |
| chr17 | 67588671 | 67588806 |
| chr17 | 67590491 | 67590656 |
| chr17 | 67606531 | 67606696 |
| chr17 | 67606751 | 67607166 |
| chr17 | 67620561 | 67620696 |
| chr17 | 67636851 | 67637036 |
| chr17 | 67689491 | 67689626 |
| chr17 | 67818701 | 67818956 |
| chr17 | 67850481 | 67850646 |
| chr17 | 67850891 | 67851016 |
| chr17 | 67861251 | 67861556 |
| chr17 | 67892571 | 67892786 |
| chr17 | 67893921 | 67894136 |
| chr17 | 67901301 | 67901466 |
| chr17 | 68114061 | 68114196 |
| chr17 | 68190521 | 68190626 |
| chr17 | 68197171 | 68197316 |
| chr17 | 69025561 | 69025706 |
| chr17 | 69086261 | 69086406 |
| chr17 | 69172671 | 69172776 |
| chr17 | 69172891 | 69172966 |
| chr17 | 69182381 | 69182456 |
| chr17 | 69212631 | 69212786 |
| chr17 | 70213651 | 70213736 |
| chr17 | 70483551 | 70483686 |
| chr17 | 70483811 | 70483916 |
| chr17 | 70594401 | 70594646 |
| chr17 | 70614851 | 70615006 |
| chr17 | 70660221 | 70660406 |
| chr17 | 70660651 | 70660826 |
| chr17 | 70699391 | 70699626 |
| chr17 | 70734941 | 70735036 |
| chr17 | 70751361 | 70751476 |

|       |          |          |
|-------|----------|----------|
| chr17 | 70761881 | 70762016 |
| chr17 | 70762041 | 70762216 |
| chr17 | 70822081 | 70822276 |
| chr17 | 70850131 | 70850246 |
| chr17 | 70918341 | 70918506 |
| chr17 | 70944601 | 70944876 |
| chr17 | 71214111 | 71214236 |
| chr17 | 71653671 | 71653786 |
| chr17 | 71846321 | 71846486 |
| chr17 | 71853861 | 71853986 |
| chr17 | 71859401 | 71859586 |
| chr17 | 71928651 | 71928826 |
| chr17 | 71981581 | 71981706 |
| chr17 | 72020501 | 72020776 |
| chr17 | 72099641 | 72099816 |
| chr17 | 72715241 | 72715386 |
| chr17 | 72902521 | 72902646 |
| chr17 | 72965411 | 72965536 |
| chr17 | 72977701 | 72977816 |
| chr17 | 73336351 | 73336486 |
| chr17 | 73463471 | 73463606 |
| chr17 | 73473351 | 73473456 |
| chr17 | 73675921 | 73676196 |
| chr17 | 73724371 | 73724596 |
| chr17 | 74685901 | 74686036 |
| chr17 | 74774891 | 74775046 |
| chr17 | 74828201 | 74828386 |
| chr17 | 74919681 | 74919806 |
| chr17 | 74919881 | 74920066 |
| chr17 | 74944241 | 74944366 |
| chr17 | 74972181 | 74972286 |
| chr17 | 75020751 | 75020946 |
| chr17 | 75106681 | 75106836 |
| chr17 | 75155601 | 75155906 |
| chr17 | 75196271 | 75196456 |
| chr17 | 75211631 | 75211866 |
| chr17 | 75212361 | 75212516 |
| chr17 | 75369741 | 75370026 |
| chr17 | 75371531 | 75371726 |
| chr17 | 75427531 | 75427896 |
| chr17 | 75546251 | 75546376 |
| chr17 | 77930541 | 77930696 |
| chr17 | 78020261 | 78020446 |
| chr17 | 78118261 | 78118426 |
| chr17 | 78125381 | 78125486 |
| chr17 | 78204351 | 78204526 |
| chr17 | 78227641 | 78227856 |
| chr17 | 78284881 | 78285146 |
| chr17 | 78315041 | 78315296 |
| chr17 | 78354861 | 78354986 |
| chr17 | 78413751 | 78413986 |
| chr17 | 78414041 | 78414156 |
| chr17 | 78513421 | 78513536 |

|       |          |          |
|-------|----------|----------|
| chr17 | 78658471 | 78658606 |
| chr17 | 78672741 | 78672846 |
| chr17 | 78928511 | 78928656 |
| chr17 | 79111221 | 79111366 |
| chr17 | 79149291 | 79149386 |
| chr17 | 79192691 | 79192856 |
| chr17 | 79258711 | 79258866 |
| chr17 | 79278121 | 79278276 |
| chr17 | 79359921 | 79360066 |
| chr17 | 79360411 | 79360516 |
| chr17 | 79566961 | 79567086 |
| chr17 | 79575531 | 79575636 |
| chr17 | 79650991 | 79651226 |
| chr17 | 79653721 | 79653856 |
| chr17 | 79653871 | 79654026 |
| chr17 | 79654961 | 79655146 |
| chr17 | 79718411 | 79718786 |
| chr17 | 79720871 | 79721036 |
| chr17 | 79726051 | 79726246 |
| chr17 | 79726341 | 79726516 |
| chr17 | 79744311 | 79744406 |
| chr17 | 79800211 | 79800346 |
| chr17 | 79800361 | 79800546 |
| chr17 | 79857431 | 79857566 |
| chr17 | 79914631 | 79914976 |
| chr17 | 79920781 | 79920926 |
| chr17 | 80000431 | 80000576 |
| chr17 | 80163471 | 80163636 |
| chr17 | 80163681 | 80163916 |
| chr17 | 80255071 | 80255286 |
| chr17 | 80359141 | 80359226 |
| chr17 | 80484271 | 80484406 |
| chr17 | 80600591 | 80600806 |
| chr17 | 80693931 | 80694096 |
| chr17 | 80698151 | 80698276 |
| chr17 | 80734441 | 80734556 |
| chr17 | 80795661 | 80795876 |
| chr17 | 80795961 | 80796116 |
| chr17 | 80796161 | 80796426 |
| chr17 | 80844641 | 80844806 |
| chr17 | 80860761 | 80861006 |
| chr17 | 80875881 | 80876116 |
| chr17 | 80881471 | 80881576 |
| chr17 | 80882111 | 80882366 |
| chr17 | 80965471 | 80965606 |
| chr17 | 80970741 | 80970966 |
| chr17 | 81363531 | 81363656 |
| chr17 | 81607071 | 81607356 |
| chr17 | 82987251 | 82987406 |
| chr17 | 83009481 | 83009696 |
| chr17 | 83018711 | 83018836 |
| chr17 | 83018931 | 83019116 |
| chr17 | 83021121 | 83021366 |

|       |          |          |
|-------|----------|----------|
| chr17 | 83023771 | 83024056 |
| chr17 | 83031451 | 83031576 |
| chr17 | 83046961 | 83047256 |
| chr17 | 83065151 | 83065356 |
| chr17 | 83082151 | 83082246 |
| chr17 | 83087211 | 83087446 |
| chr17 | 83091491 | 83091726 |
| chr17 | 83112811 | 83112996 |
| chr17 | 83146471 | 83146726 |
| chr17 | 83159481 | 83159596 |
| chr17 | 83290501 | 83290736 |
| chr17 | 83375341 | 83375516 |
| chr17 | 83454421 | 83454576 |
| chr17 | 83475551 | 83475706 |
| chr17 | 83475781 | 83475886 |
| chr17 | 83481291 | 83481496 |
| chr17 | 83481501 | 83481676 |
| chr17 | 83522071 | 83522246 |
| chr17 | 83615301 | 83615466 |
| chr17 | 83644011 | 83644166 |
| chr17 | 83655161 | 83655346 |
| chr17 | 83865241 | 83865346 |
| chr17 | 83907281 | 83907516 |
| chr17 | 83935791 | 83936106 |
| chr17 | 84064561 | 84064896 |
| chr17 | 84065131 | 84065376 |
| chr17 | 84065521 | 84065836 |
| chr17 | 84065841 | 84065986 |
| chr17 | 84085791 | 84085966 |
| chr17 | 84233791 | 84234016 |
| chr17 | 84504461 | 84504586 |
| chr17 | 84511511 | 84511616 |
| chr17 | 84519841 | 84520086 |
| chr17 | 84573431 | 84573676 |
| chr17 | 84592501 | 84592676 |
| chr17 | 84617961 | 84618066 |
| chr17 | 84624241 | 84624366 |
| chr17 | 84624901 | 84625006 |
| chr17 | 84653551 | 84653736 |
| chr17 | 84801771 | 84801886 |
| chr17 | 85089101 | 85089276 |
| chr17 | 85098481 | 85098676 |
| chr17 | 85158171 | 85158296 |
| chr17 | 85341511 | 85341636 |
| chr17 | 85367011 | 85367156 |
| chr17 | 85381871 | 85381966 |
| chr17 | 85471351 | 85471456 |
| chr17 | 85510291 | 85510416 |
| chr17 | 85537271 | 85537486 |
| chr17 | 85645451 | 85645586 |
| chr17 | 85645681 | 85645986 |
| chr17 | 85656461 | 85656806 |
| chr17 | 85656911 | 85657066 |

|       |          |          |
|-------|----------|----------|
| chr17 | 85657301 | 85657416 |
| chr17 | 85683341 | 85683586 |
| chr17 | 85766351 | 85766686 |
| chr17 | 85839601 | 85839726 |
| chr17 | 85839871 | 85840026 |
| chr17 | 85858341 | 85858536 |
| chr17 | 85892651 | 85892796 |
| chr17 | 86044391 | 86044526 |
| chr17 | 86093271 | 86093426 |
| chr17 | 86239041 | 86239236 |
| chr17 | 86279201 | 86279306 |
| chr17 | 86373141 | 86373446 |
| chr17 | 86374471 | 86374646 |
| chr17 | 86385001 | 86385286 |
| chr17 | 86522901 | 86523046 |
| chr17 | 86557271 | 86557466 |
| chr17 | 86812031 | 86812156 |
| chr17 | 87010941 | 87011086 |
| chr17 | 87018111 | 87018226 |
| chr17 | 87024081 | 87024206 |
| chr17 | 87106461 | 87106616 |
| chr17 | 87259221 | 87259626 |
| chr17 | 87260461 | 87260626 |
| chr17 | 87324451 | 87324576 |
| chr17 | 87380251 | 87380356 |
| chr17 | 87386111 | 87386326 |
| chr17 | 87459071 | 87459216 |
| chr17 | 87475511 | 87475746 |
| chr17 | 87688851 | 87688996 |
| chr17 | 87785651 | 87785776 |
| chr17 | 87785881 | 87786156 |
| chr17 | 87787111 | 87787246 |
| chr17 | 88173701 | 88173836 |
| chr17 | 88183571 | 88183686 |
| chr17 | 88226831 | 88226946 |
| chr17 | 88234711 | 88234896 |
| chr17 | 88236191 | 88236526 |
| chr17 | 88307361 | 88307646 |
| chr17 | 88308441 | 88308646 |
| chr17 | 88309511 | 88309726 |
| chr17 | 88310921 | 88311086 |
| chr17 | 88311261 | 88311496 |
| chr17 | 88394971 | 88395236 |
| chr17 | 88442781 | 88443066 |
| chr17 | 88443931 | 88444156 |
| chr17 | 88451261 | 88451766 |
| chr17 | 88451901 | 88452026 |
| chr17 | 88534921 | 88535166 |
| chr17 | 88538441 | 88538616 |
| chr17 | 88544911 | 88545246 |
| chr17 | 88545291 | 88545426 |
| chr17 | 88567911 | 88568036 |
| chr17 | 88682771 | 88682926 |

|       |          |          |
|-------|----------|----------|
| chr17 | 88841781 | 88841876 |
| chr17 | 90039281 | 90039536 |
| chr17 | 90453021 | 90453166 |
| chr17 | 90675971 | 90676296 |
| chr17 | 90941921 | 90942106 |
| chr17 | 91375101 | 91375316 |
| chr16 | 4391201  | 4391406  |
| chr16 | 4517681  | 4517766  |
| chr16 | 5025481  | 5025636  |
| chr16 | 5051921  | 5052046  |
| chr16 | 5052401  | 5052806  |
| chr16 | 5054911  | 5055286  |
| chr16 | 5074521  | 5074776  |
| chr16 | 5178671  | 5178766  |
| chr16 | 5666761  | 5666896  |
| chr16 | 6750541  | 6750726  |
| chr16 | 6788321  | 6788396  |
| chr16 | 6959671  | 6959776  |
| chr16 | 6967811  | 6968046  |
| chr16 | 7079751  | 7079926  |
| chr16 | 7261761  | 7261906  |
| chr16 | 7335451  | 7335606  |
| chr16 | 8033161  | 8033376  |
| chr16 | 8404601  | 8404696  |
| chr16 | 8407091  | 8407326  |
| chr16 | 8454641  | 8454816  |
| chr16 | 8485601  | 8485746  |
| chr16 | 8535321  | 8535386  |
| chr16 | 9575141  | 9575226  |
| chr16 | 10688571 | 10688686 |
| chr16 | 10886081 | 10886186 |
| chr16 | 10890391 | 10890526 |
| chr16 | 11341871 | 11342076 |
| chr16 | 11389411 | 11389496 |
| chr16 | 11446291 | 11446426 |
| chr16 | 11510511 | 11510656 |
| chr16 | 11803851 | 11803986 |
| chr16 | 12551681 | 12551846 |
| chr16 | 12959121 | 12959286 |
| chr16 | 13237531 | 13237636 |
| chr16 | 13271881 | 13272106 |
| chr16 | 13277781 | 13277946 |
| chr16 | 13524501 | 13524616 |
| chr16 | 14206491 | 14206736 |
| chr16 | 14420141 | 14420306 |
| chr16 | 16138221 | 16138346 |
| chr16 | 16169611 | 16169766 |
| chr16 | 16196881 | 16197016 |
| chr16 | 18094881 | 18095426 |
| chr16 | 18099381 | 18099586 |
| chr16 | 18160911 | 18161116 |
| chr16 | 18466261 | 18466426 |
| chr16 | 18618761 | 18618906 |



|       |          |          |
|-------|----------|----------|
| chr16 | 20358811 | 20358956 |
| chr16 | 20390291 | 20390426 |
| chr16 | 20504341 | 20504476 |
| chr16 | 20729211 | 20729326 |
| chr16 | 21030251 | 21030366 |
| chr16 | 21057411 | 21057546 |
| chr16 | 21316321 | 21316456 |
| chr16 | 21719811 | 21719956 |
| chr16 | 21729731 | 21729896 |
| chr16 | 21732741 | 21732906 |
| chr16 | 21779461 | 21779836 |
| chr16 | 21780371 | 21780476 |
| chr16 | 21782701 | 21782946 |
| chr16 | 22039941 | 22040106 |
| chr16 | 22056231 | 22056396 |
| chr16 | 22149361 | 22149486 |
| chr16 | 22149731 | 22149886 |
| chr16 | 22288051 | 22288366 |
| chr16 | 22295291 | 22295566 |
| chr16 | 22333561 | 22333686 |
| chr16 | 22349151 | 22349296 |
| chr16 | 22349381 | 22349646 |
| chr16 | 22349671 | 22349846 |
| chr16 | 22350231 | 22350416 |
| chr16 | 22371271 | 22371436 |
| chr16 | 22430871 | 22431006 |
| chr16 | 22464541 | 22464676 |
| chr16 | 22466151 | 22466276 |
| chr16 | 22467721 | 22467886 |
| chr16 | 22490341 | 22490636 |
| chr16 | 22546071 | 22546226 |
| chr16 | 22546381 | 22546496 |
| chr16 | 22649311 | 22649826 |
| chr16 | 22715181 | 22715296 |
| chr16 | 22716121 | 22716286 |
| chr16 | 23145571 | 23145736 |
| chr16 | 23152821 | 23152926 |
| chr16 | 23155791 | 23155996 |
| chr16 | 23156331 | 23156496 |
| chr16 | 23166551 | 23166616 |
| chr16 | 23173821 | 23174006 |
| chr16 | 23185301 | 23185416 |
| chr16 | 23189221 | 23189536 |
| chr16 | 23222941 | 23223286 |
| chr16 | 23229191 | 23229326 |
| chr16 | 23230191 | 23230316 |
| chr16 | 23230391 | 23230646 |
| chr16 | 23332241 | 23332396 |
| chr16 | 23332751 | 23332836 |
| chr16 | 23754091 | 23754216 |
| chr16 | 23849891 | 23849976 |
| chr16 | 23972351 | 23972466 |
| chr16 | 23972601 | 23972766 |

|       |          |          |
|-------|----------|----------|
| chr16 | 24263321 | 24263426 |
| chr16 | 24263441 | 24263606 |
| chr16 | 24314191 | 24314336 |
| chr16 | 24349041 | 24349186 |
| chr16 | 24406191 | 24406356 |
| chr16 | 24653491 | 24653626 |
| chr16 | 24746271 | 24746386 |
| chr16 | 24746431 | 24746616 |
| chr16 | 24750141 | 24750266 |
| chr16 | 25190931 | 25191126 |
| chr16 | 25322861 | 25322966 |
| chr16 | 25500251 | 25500346 |
| chr16 | 25726441 | 25726776 |
| chr16 | 25733611 | 25733686 |
| chr16 | 25964911 | 25965046 |
| chr16 | 25994441 | 25994746 |
| chr16 | 26816811 | 26816916 |
| chr16 | 27439121 | 27439186 |
| chr16 | 28407041 | 28407196 |
| chr16 | 28489761 | 28489836 |
| chr16 | 28563081 | 28563286 |
| chr16 | 28751951 | 28752066 |
| chr16 | 28761041 | 28761266 |
| chr16 | 28762091 | 28762226 |
| chr16 | 28771451 | 28771606 |
| chr16 | 28800281 | 28800496 |
| chr16 | 28800661 | 28800736 |
| chr16 | 28800771 | 28800986 |
| chr16 | 28818421 | 28818536 |
| chr16 | 28826831 | 28826986 |
| chr16 | 28921021 | 28921156 |
| chr16 | 28954211 | 28954366 |
| chr16 | 29444561 | 29444646 |
| chr16 | 29557531 | 29557696 |
| chr16 | 29608071 | 29608206 |
| chr16 | 29608881 | 29609016 |
| chr16 | 29614161 | 29614286 |
| chr16 | 29615211 | 29615306 |
| chr16 | 29638701 | 29638906 |
| chr16 | 29639761 | 29639926 |
| chr16 | 29639941 | 29640166 |
| chr16 | 29649351 | 29649556 |
| chr16 | 29654741 | 29654866 |
| chr16 | 29662771 | 29662966 |
| chr16 | 29696051 | 29696216 |
| chr16 | 29736981 | 29737086 |
| chr16 | 29744041 | 29744146 |
| chr16 | 29753091 | 29753346 |
| chr16 | 29757111 | 29757566 |
| chr16 | 29769281 | 29769426 |
| chr16 | 29771671 | 29771806 |
| chr16 | 29772071 | 29772156 |
| chr16 | 29796021 | 29796196 |

|       |          |          |
|-------|----------|----------|
| chr16 | 29796381 | 29796536 |
| chr16 | 29802011 | 29802146 |
| chr16 | 29803391 | 29803516 |
| chr16 | 29813451 | 29813976 |
| chr16 | 29826941 | 29827056 |
| chr16 | 29827071 | 29827216 |
| chr16 | 29865941 | 29866066 |
| chr16 | 29869931 | 29870156 |
| chr16 | 29887591 | 29887746 |
| chr16 | 29929541 | 29929676 |
| chr16 | 29957521 | 29957666 |
| chr16 | 29958371 | 29958666 |
| chr16 | 29959171 | 29959366 |
| chr16 | 30006251 | 30006386 |
| chr16 | 30018951 | 30019066 |
| chr16 | 30023061 | 30023176 |
| chr16 | 30040481 | 30040576 |
| chr16 | 30049881 | 30050016 |
| chr16 | 30091881 | 30092036 |
| chr16 | 30106021 | 30106126 |
| chr16 | 30141301 | 30141446 |
| chr16 | 30142611 | 30142756 |
| chr16 | 30162051 | 30162146 |
| chr16 | 30162401 | 30162546 |
| chr16 | 30163731 | 30164016 |
| chr16 | 30164051 | 30164246 |
| chr16 | 30204021 | 30204116 |
| chr16 | 30316851 | 30317056 |
| chr16 | 30422521 | 30422676 |
| chr16 | 30575561 | 30575666 |
| chr16 | 30640601 | 30640716 |
| chr16 | 30695361 | 30695486 |
| chr16 | 30717821 | 30718006 |
| chr16 | 30740971 | 30741066 |
| chr16 | 30741121 | 30741236 |
| chr16 | 30790031 | 30790186 |
| chr16 | 30854211 | 30854426 |
| chr16 | 30976561 | 30976676 |
| chr16 | 30990471 | 30990636 |
| chr16 | 31013091 | 31013246 |
| chr16 | 31108181 | 31108276 |
| chr16 | 31112621 | 31112716 |
| chr16 | 31397051 | 31397166 |
| chr16 | 31412851 | 31413006 |
| chr16 | 31413021 | 31413206 |
| chr16 | 31413451 | 31413676 |
| chr16 | 32120631 | 32120736 |
| chr16 | 32120821 | 32120976 |
| chr16 | 32232271 | 32232376 |
| chr16 | 32233211 | 32233426 |
| chr16 | 32382731 | 32382966 |
| chr16 | 32404231 | 32404486 |
| chr16 | 32453111 | 32453256 |

|       |          |          |
|-------|----------|----------|
| chr16 | 32637431 | 32637586 |
| chr16 | 32735111 | 32735246 |
| chr16 | 32778571 | 32778746 |
| chr16 | 32876741 | 32877016 |
| chr16 | 33366511 | 33366686 |
| chr16 | 33443561 | 33443736 |
| chr16 | 33593401 | 33593596 |
| chr16 | 33684201 | 33684476 |
| chr16 | 33761901 | 33762066 |
| chr16 | 33841971 | 33842106 |
| chr16 | 34227381 | 34227506 |
| chr16 | 34236121 | 34236276 |
| chr16 | 34326891 | 34327066 |
| chr16 | 34376151 | 34376416 |
| chr16 | 34433661 | 34433766 |
| chr16 | 34440871 | 34440976 |
| chr16 | 34477741 | 34478006 |
| chr16 | 34619931 | 34620186 |
| chr16 | 34692421 | 34692566 |
| chr16 | 34702641 | 34702716 |
| chr16 | 34724111 | 34724266 |
| chr16 | 34727671 | 34727806 |
| chr16 | 34727961 | 34728236 |
| chr16 | 34970941 | 34971046 |
| chr16 | 35409111 | 35409236 |
| chr16 | 35421331 | 35421466 |
| chr16 | 35436221 | 35436346 |
| chr16 | 35438141 | 35438276 |
| chr16 | 35438441 | 35438706 |
| chr16 | 35489581 | 35489836 |
| chr16 | 35507691 | 35507836 |
| chr16 | 35508611 | 35508716 |
| chr16 | 35608581 | 35608666 |
| chr16 | 36380741 | 36380896 |
| chr16 | 36464691 | 36464846 |
| chr16 | 37358431 | 37358596 |
| chr16 | 37371511 | 37371646 |
| chr16 | 37634431 | 37634556 |
| chr16 | 37698091 | 37698196 |
| chr16 | 37707601 | 37707756 |
| chr16 | 37845541 | 37845676 |
| chr16 | 37883311 | 37883446 |
| chr16 | 37914091 | 37914306 |
| chr16 | 37972651 | 37972806 |
| chr16 | 38054741 | 38054886 |
| chr16 | 38064211 | 38064346 |
| chr16 | 38376401 | 38376516 |
| chr16 | 38396731 | 38396856 |
| chr16 | 38692521 | 38692806 |
| chr16 | 38775481 | 38775616 |
| chr16 | 38901971 | 38902096 |
| chr16 | 41934421 | 41934546 |
| chr16 | 42147321 | 42147446 |

|       |          |          |
|-------|----------|----------|
| chr16 | 42194871 | 42195136 |
| chr16 | 42360421 | 42360496 |
| chr16 | 42399491 | 42399586 |
| chr16 | 42400681 | 42400846 |
| chr16 | 42424411 | 42424696 |
| chr16 | 42590971 | 42591116 |
| chr16 | 42622181 | 42622336 |
| chr16 | 42700571 | 42700686 |
| chr16 | 42722861 | 42722976 |
| chr16 | 42865071 | 42865286 |
| chr16 | 43421741 | 43422016 |
| chr16 | 43422371 | 43422546 |
| chr16 | 43423161 | 43423356 |
| chr16 | 43467371 | 43467516 |
| chr16 | 43468941 | 43469086 |
| chr16 | 43471071 | 43471216 |
| chr16 | 43476891 | 43477006 |
| chr16 | 43495111 | 43495236 |
| chr16 | 43496911 | 43497106 |
| chr16 | 43518651 | 43518746 |
| chr16 | 43540981 | 43541166 |
| chr16 | 43629231 | 43629366 |
| chr16 | 43844641 | 43844776 |
| chr16 | 44299991 | 44300116 |
| chr16 | 44446041 | 44446246 |
| chr16 | 44446271 | 44446386 |
| chr16 | 44449101 | 44449296 |
| chr16 | 44453171 | 44453316 |
| chr16 | 44498961 | 44499096 |
| chr16 | 44499101 | 44499236 |
| chr16 | 44585061 | 44585286 |
| chr16 | 44598221 | 44598376 |
| chr16 | 44598961 | 44599126 |
| chr16 | 44606621 | 44606786 |
| chr16 | 44606931 | 44607046 |
| chr16 | 45790731 | 45790796 |
| chr16 | 46213291 | 46213396 |
| chr16 | 46350051 | 46350206 |
| chr16 | 46427731 | 46427926 |
| chr16 | 47394911 | 47395016 |
| chr16 | 47710031 | 47710156 |
| chr16 | 48109761 | 48109916 |
| chr16 | 49327961 | 49328146 |
| chr16 | 49328241 | 49328476 |
| chr16 | 49587441 | 49587536 |
| chr16 | 49612331 | 49612426 |
| chr16 | 49779891 | 49779956 |
| chr16 | 49883981 | 49884166 |
| chr16 | 49904981 | 49905216 |
| chr16 | 49922731 | 49922906 |
| chr16 | 49929421 | 49929616 |
| chr16 | 50290891 | 50291036 |
| chr16 | 50293131 | 50293336 |

|       |          |          |
|-------|----------|----------|
| chr16 | 50299761 | 50299856 |
| chr16 | 50299901 | 50300046 |
| chr16 | 50388601 | 50388746 |
| chr16 | 50400891 | 50401046 |
| chr16 | 50524311 | 50524436 |
| chr16 | 50703151 | 50703366 |
| chr16 | 50703601 | 50703756 |
| chr16 | 51984371 | 51984526 |
| chr16 | 52137541 | 52137656 |
| chr16 | 55319961 | 55320146 |
| chr16 | 55744341 | 55744556 |
| chr16 | 55749211 | 55749406 |
| chr16 | 55777541 | 55777686 |
| chr16 | 57173271 | 57173396 |
| chr16 | 57239801 | 57239936 |
| chr16 | 57287571 | 57287746 |
| chr16 | 57288421 | 57288536 |
| chr16 | 57365281 | 57365506 |
| chr16 | 57395121 | 57395256 |
| chr16 | 57405851 | 57406136 |
| chr16 | 57431471 | 57431606 |
| chr16 | 57675831 | 57675916 |
| chr16 | 57780151 | 57780306 |
| chr16 | 57866171 | 57866326 |
| chr16 | 58069651 | 58069906 |
| chr16 | 58331521 | 58331676 |
| chr16 | 58356091 | 58356216 |
| chr16 | 58364621 | 58364776 |
| chr16 | 59382691 | 59382786 |
| chr16 | 59387261 | 59387386 |
| chr16 | 59486261 | 59486446 |
| chr16 | 63594491 | 63594646 |
| chr16 | 63601161 | 63601306 |
| chr16 | 67262671 | 67262806 |
| chr16 | 70211781 | 70211886 |
| chr16 | 72210091 | 72210226 |
| chr16 | 72276361 | 72276506 |
| chr16 | 72434701 | 72434816 |
| chr16 | 72518931 | 72519056 |
| chr16 | 72548311 | 72548456 |
| chr16 | 72561171 | 72561526 |
| chr16 | 72617851 | 72618056 |
| chr16 | 72671101 | 72671226 |
| chr16 | 72691171 | 72691376 |
| chr16 | 72712261 | 72712536 |
| chr16 | 72807171 | 72807406 |
| chr16 | 72832151 | 72832266 |
| chr16 | 72875251 | 72875376 |
| chr16 | 72876061 | 72876176 |
| chr16 | 72876381 | 72876486 |
| chr16 | 72876581 | 72876736 |
| chr16 | 72918501 | 72918686 |
| chr16 | 72921311 | 72921466 |

|       |          |          |
|-------|----------|----------|
| chr16 | 72979921 | 72980256 |
| chr16 | 73747381 | 73747506 |
| chr16 | 74204851 | 74204966 |
| chr16 | 74307951 | 74308106 |
| chr16 | 74527651 | 74527746 |
| chr16 | 74527801 | 74527956 |
| chr16 | 74678331 | 74678466 |
| chr16 | 74691921 | 74692026 |
| chr16 | 74714791 | 74714886 |
| chr16 | 75316011 | 75316166 |
| chr16 | 76175491 | 76175736 |
| chr16 | 76240851 | 76240996 |
| chr16 | 76241201 | 76241346 |
| chr16 | 76336341 | 76336476 |
| chr16 | 76337581 | 76337766 |
| chr16 | 76337811 | 76338026 |
| chr16 | 76420851 | 76420966 |
| chr16 | 76479911 | 76480066 |
| chr16 | 76577731 | 76577836 |
| chr16 | 76607951 | 76608236 |
| chr16 | 76612631 | 76612776 |
| chr16 | 76778921 | 76779076 |
| chr16 | 76841231 | 76841396 |
| chr16 | 76888691 | 76888846 |
| chr16 | 76899231 | 76899406 |
| chr16 | 77184231 | 77184376 |
| chr16 | 77211701 | 77211996 |
| chr16 | 77212021 | 77212126 |
| chr16 | 77212341 | 77212446 |
| chr16 | 77213751 | 77213866 |
| chr16 | 77266981 | 77267126 |
| chr16 | 77282631 | 77282746 |
| chr16 | 77282771 | 77282846 |
| chr16 | 77288191 | 77288276 |
| chr16 | 77288551 | 77288896 |
| chr16 | 77304251 | 77304416 |
| chr16 | 77382661 | 77382826 |
| chr16 | 77414421 | 77414556 |
| chr16 | 77419621 | 77419756 |
| chr16 | 78147261 | 78147406 |
| chr16 | 78419961 | 78420076 |
| chr16 | 78913591 | 78913736 |
| chr16 | 84228871 | 84228996 |
| chr16 | 84679341 | 84679466 |
| chr16 | 84850441 | 84850696 |
| chr16 | 84976281 | 84976536 |
| chr16 | 85020981 | 85021126 |
| chr16 | 85039341 | 85039516 |
| chr16 | 85048741 | 85048986 |
| chr16 | 85053251 | 85053516 |
| chr16 | 85189821 | 85189946 |
| chr16 | 85569901 | 85570106 |
| chr16 | 85637301 | 85637396 |

|       |          |          |
|-------|----------|----------|
| chr16 | 85777011 | 85777136 |
| chr16 | 87136351 | 87136446 |
| chr16 | 87136501 | 87136636 |
| chr16 | 88319211 | 88319486 |
| chr16 | 88451551 | 88451796 |
| chr16 | 89588451 | 89588626 |
| chr16 | 89679211 | 89679486 |
| chr16 | 89738471 | 89738646 |
| chr16 | 89789561 | 89789866 |
| chr16 | 89823561 | 89823716 |
| chr16 | 89827131 | 89827256 |
| chr16 | 89827931 | 89828296 |
| chr16 | 89961581 | 89961846 |
| chr16 | 89961961 | 89962096 |
| chr16 | 89970361 | 89970466 |
| chr16 | 90017841 | 90018006 |
| chr16 | 90076351 | 90076446 |
| chr16 | 90136401 | 90136516 |
| chr16 | 90246811 | 90246916 |
| chr16 | 90294571 | 90294746 |
| chr16 | 90296881 | 90297036 |
| chr16 | 90310151 | 90310356 |
| chr16 | 90310491 | 90310666 |
| chr16 | 90514661 | 90514806 |
| chr16 | 90565901 | 90566036 |
| chr16 | 90631131 | 90631286 |
| chr16 | 90668791 | 90669056 |
| chr16 | 90782851 | 90782996 |
| chr16 | 90788461 | 90788666 |
| chr16 | 91029481 | 91029666 |
| chr16 | 91061971 | 91062196 |
| chr16 | 91062261 | 91062406 |
| chr16 | 91081481 | 91081596 |
| chr16 | 91081641 | 91081846 |
| chr16 | 91190331 | 91190476 |
| chr16 | 91190501 | 91190726 |
| chr16 | 91209841 | 91210006 |
| chr16 | 91222931 | 91223066 |
| chr16 | 91223091 | 91223266 |
| chr16 | 91224951 | 91225116 |
| chr16 | 91442711 | 91442806 |
| chr16 | 91648521 | 91648616 |
| chr16 | 91659571 | 91659746 |
| chr16 | 91664921 | 91665056 |
| chr16 | 91716591 | 91716726 |
| chr16 | 91724591 | 91724926 |
| chr16 | 91725691 | 91725956 |
| chr16 | 91729671 | 91729796 |
| chr16 | 91735301 | 91735626 |
| chr16 | 91851161 | 91851376 |
| chr16 | 91851501 | 91851666 |
| chr16 | 91884251 | 91884586 |
| chr16 | 91884621 | 91884766 |



|       |          |          |
|-------|----------|----------|
| chr16 | 91913331 | 91913426 |
| chr16 | 92261471 | 92261616 |
| chr16 | 92286611 | 92286726 |
| chr16 | 92353401 | 92353526 |
| chr16 | 92516281 | 92516436 |
| chr16 | 92520611 | 92520726 |
| chr16 | 92541691 | 92541866 |
| chr16 | 92629461 | 92629546 |
| chr16 | 92792481 | 92792586 |
| chr16 | 92881231 | 92881356 |
| chr16 | 93100841 | 93100966 |
| chr16 | 93180721 | 93180856 |
| chr16 | 93200331 | 93200456 |
| chr16 | 93403121 | 93403256 |
| chr16 | 93428631 | 93428796 |
| chr16 | 93707271 | 93707686 |
| chr16 | 93778511 | 93778676 |
| chr16 | 93895611 | 93895806 |
| chr16 | 93899651 | 93899796 |
| chr16 | 93947551 | 93947696 |
| chr16 | 94272081 | 94272246 |
| chr16 | 94274261 | 94274446 |
| chr16 | 94337501 | 94337736 |
| chr16 | 94465311 | 94465436 |
| chr16 | 94653391 | 94653626 |
| chr16 | 94708941 | 94709046 |
| chr16 | 94710571 | 94710666 |
| chr16 | 94740971 | 94741106 |
| chr16 | 94746421 | 94746586 |
| chr16 | 95034291 | 95034396 |
| chr16 | 95230971 | 95231096 |
| chr16 | 95236241 | 95236386 |
| chr16 | 95236581 | 95236736 |
| chr16 | 95449781 | 95450006 |
| chr16 | 95450021 | 95450176 |
| chr16 | 95776761 | 95776946 |
| chr16 | 95936621 | 95936786 |
| chr16 | 96383621 | 96383766 |
| chr16 | 96384001 | 96384146 |
| chr16 | 96386171 | 96386266 |
| chr16 | 96467931 | 96468216 |
| chr16 | 96476251 | 96476336 |
| chr16 | 96602701 | 96602826 |
| chr16 | 96977851 | 96977996 |
| chr16 | 97397781 | 97398006 |
| chr16 | 97871511 | 97871716 |
| chr16 | 98049991 | 98050106 |
| chr15 | 3198211  | 3198316  |
| chr15 | 4031081  | 4031186  |
| chr15 | 4031251  | 4031346  |
| chr15 | 4074491  | 4074806  |
| chr15 | 4306551  | 4306666  |
| chr15 | 4874491  | 4874586  |

|       |          |          |
|-------|----------|----------|
| chr15 | 5081771  | 5081936  |
| chr15 | 5210671  | 5210766  |
| chr15 | 6258701  | 6258886  |
| chr15 | 6270861  | 6271016  |
| chr15 | 6334571  | 6334666  |
| chr15 | 6512311  | 6512466  |
| chr15 | 6604191  | 6604326  |
| chr15 | 6652801  | 6652936  |
| chr15 | 6691141  | 6691326  |
| chr15 | 6808581  | 6808686  |
| chr15 | 6901751  | 6901896  |
| chr15 | 7027571  | 7027706  |
| chr15 | 7141431  | 7141736  |
| chr15 | 7199691  | 7199886  |
| chr15 | 7479911  | 7480036  |
| chr15 | 7481141  | 7481316  |
| chr15 | 7482151  | 7482256  |
| chr15 | 7485261  | 7485386  |
| chr15 | 7560421  | 7560546  |
| chr15 | 7839241  | 7839396  |
| chr15 | 7954651  | 7954756  |
| chr15 | 8460281  | 8460416  |
| chr15 | 8600801  | 8601046  |
| chr15 | 8681411  | 8681576  |
| chr15 | 8703821  | 8703936  |
| chr15 | 8728541  | 8728806  |
| chr15 | 8729491  | 8729596  |
| chr15 | 8733081  | 8733176  |
| chr15 | 8749331  | 8749506  |
| chr15 | 8764941  | 8765066  |
| chr15 | 8830191  | 8830356  |
| chr15 | 10366291 | 10366486 |
| chr15 | 10543581 | 10544046 |
| chr15 | 10555841 | 10556116 |
| chr15 | 10568631 | 10568786 |
| chr15 | 10579831 | 10580026 |
| chr15 | 10580071 | 10580236 |
| chr15 | 10589901 | 10590106 |
| chr15 | 10593101 | 10593256 |
| chr15 | 10613071 | 10613216 |
| chr15 | 10613251 | 10613376 |
| chr15 | 10614911 | 10614986 |
| chr15 | 10617831 | 10618046 |
| chr15 | 10634871 | 10635036 |
| chr15 | 10635241 | 10635406 |
| chr15 | 10665441 | 10665636 |
| chr15 | 10691611 | 10691766 |
| chr15 | 10775801 | 10775916 |
| chr15 | 10813931 | 10814306 |
| chr15 | 10814711 | 10814876 |
| chr15 | 10896761 | 10897146 |
| chr15 | 11043851 | 11044026 |
| chr15 | 11059641 | 11059746 |

|       |          |          |
|-------|----------|----------|
| chr15 | 11474821 | 11474906 |
| chr15 | 11641891 | 11642016 |
| chr15 | 11764761 | 11764886 |
| chr15 | 12163541 | 12163616 |
| chr15 | 12178781 | 12178886 |
| chr15 | 12286311 | 12286466 |
| chr15 | 12435511 | 12435646 |
| chr15 | 12463091 | 12463206 |
| chr15 | 12502521 | 12502636 |
| chr15 | 12505281 | 12505466 |
| chr15 | 12876761 | 12876966 |
| chr15 | 12970611 | 12970756 |
| chr15 | 13116651 | 13116776 |
| chr15 | 13129191 | 13129346 |
| chr15 | 13137851 | 13138106 |
| chr15 | 13138141 | 13138276 |
| chr15 | 13158191 | 13158346 |
| chr15 | 13161621 | 13161786 |
| chr15 | 13311481 | 13311576 |
| chr15 | 13312401 | 13312526 |
| chr15 | 13312661 | 13312866 |
| chr15 | 13314091 | 13314186 |
| chr15 | 13914721 | 13914806 |
| chr15 | 18754151 | 18754306 |
| chr15 | 21055821 | 21055986 |
| chr15 | 21513361 | 21513576 |
| chr15 | 21991931 | 21992066 |
| chr15 | 24894331 | 24894486 |
| chr15 | 24916881 | 24917076 |
| chr15 | 25227141 | 25227276 |
| chr15 | 25272301 | 25272456 |
| chr15 | 25389111 | 25389226 |
| chr15 | 25389281 | 25389416 |
| chr15 | 25517231 | 25517516 |
| chr15 | 25528781 | 25528996 |
| chr15 | 25548051 | 25548176 |
| chr15 | 25608411 | 25608496 |
| chr15 | 25681341 | 25681476 |
| chr15 | 25701391 | 25701506 |
| chr15 | 25702681 | 25702896 |
| chr15 | 25822521 | 25822696 |
| chr15 | 26097931 | 26098056 |
| chr15 | 26598451 | 26598546 |
| chr15 | 26898861 | 26898986 |
| chr15 | 27070731 | 27070836 |
| chr15 | 27074951 | 27075126 |
| chr15 | 27406661 | 27406756 |
| chr15 | 27407671 | 27407786 |
| chr15 | 27448641 | 27448776 |
| chr15 | 27483811 | 27483966 |
| chr15 | 27627541 | 27627656 |
| chr15 | 27724481 | 27724636 |
| chr15 | 27728951 | 27729076 |

|       |          |          |
|-------|----------|----------|
| chr15 | 27800611 | 27800786 |
| chr15 | 27801041 | 27801266 |
| chr15 | 27869361 | 27869436 |
| chr15 | 27869571 | 27870046 |
| chr15 | 27871721 | 27871896 |
| chr15 | 27881831 | 27881976 |
| chr15 | 27882311 | 27882476 |
| chr15 | 27882851 | 27883016 |
| chr15 | 27936021 | 27936176 |
| chr15 | 27936571 | 27936686 |
| chr15 | 27942141 | 27942886 |
| chr15 | 27943041 | 27943186 |
| chr15 | 27995811 | 27995896 |
| chr15 | 27995911 | 27996246 |
| chr15 | 28147751 | 28147916 |
| chr15 | 28161051 | 28161266 |
| chr15 | 28612431 | 28612526 |
| chr15 | 30179241 | 30179426 |
| chr15 | 30801911 | 30802066 |
| chr15 | 30885251 | 30885406 |
| chr15 | 31256111 | 31256246 |
| chr15 | 31285771 | 31285986 |
| chr15 | 31289631 | 31289896 |
| chr15 | 31290071 | 31290196 |
| chr15 | 31480681 | 31480956 |
| chr15 | 31550551 | 31550716 |
| chr15 | 31698551 | 31698776 |
| chr15 | 31814571 | 31814706 |
| chr15 | 31947991 | 31948136 |
| chr15 | 32202181 | 32202346 |
| chr15 | 32202521 | 32202626 |
| chr15 | 32416391 | 32416616 |
| chr15 | 32912391 | 32912516 |
| chr15 | 34229581 | 34229786 |
| chr15 | 34230041 | 34230146 |
| chr15 | 34691271 | 34691486 |
| chr15 | 35021581 | 35021736 |
| chr15 | 35858661 | 35858776 |
| chr15 | 35859421 | 35859636 |
| chr15 | 36010741 | 36010896 |
| chr15 | 36239731 | 36239846 |
| chr15 | 36522911 | 36523166 |
| chr15 | 36584031 | 36584126 |
| chr15 | 36600391 | 36600556 |
| chr15 | 36676681 | 36676836 |
| chr15 | 36817981 | 36818076 |
| chr15 | 37182821 | 37183016 |
| chr15 | 37245221 | 37245396 |
| chr15 | 37262481 | 37262606 |
| chr15 | 37263011 | 37263116 |
| chr15 | 37380281 | 37380376 |
| chr15 | 37476791 | 37476976 |
| chr15 | 37615641 | 37615796 |

|       |          |          |
|-------|----------|----------|
| chr15 | 37678711 | 37678876 |
| chr15 | 38020391 | 38020526 |
| chr15 | 38040821 | 38040966 |
| chr15 | 38198651 | 38198866 |
| chr15 | 38213261 | 38213536 |
| chr15 | 38398981 | 38399096 |
| chr15 | 38507431 | 38507526 |
| chr15 | 38647611 | 38647726 |
| chr15 | 38849611 | 38849756 |
| chr15 | 38911291 | 38911456 |
| chr15 | 39706841 | 39706996 |
| chr15 | 39727041 | 39727206 |
| chr15 | 40332041 | 40332136 |
| chr15 | 40716981 | 40717126 |
| chr15 | 40920011 | 40920146 |
| chr15 | 41442441 | 41442596 |
| chr15 | 41555031 | 41555176 |
| chr15 | 41660211 | 41660336 |
| chr15 | 41671111 | 41671316 |
| chr15 | 41673511 | 41673656 |
| chr15 | 41676211 | 41676316 |
| chr15 | 42197141 | 42197256 |
| chr15 | 42268371 | 42268466 |
| chr15 | 42451871 | 42451996 |
| chr15 | 42507011 | 42507126 |
| chr15 | 43337441 | 43337606 |
| chr15 | 50437231 | 50437386 |
| chr15 | 50496161 | 50496366 |
| chr15 | 50496441 | 50496706 |
| chr15 | 50517401 | 50517596 |
| chr15 | 50577221 | 50577396 |
| chr15 | 50619281 | 50619476 |
| chr15 | 50647901 | 50648016 |
| chr15 | 50678391 | 50678486 |
| chr15 | 50934561 | 50934816 |
| chr15 | 50935771 | 50936126 |
| chr15 | 51193661 | 51193826 |
| chr15 | 51333051 | 51333196 |
| chr15 | 51366601 | 51366716 |
| chr15 | 51628661 | 51628756 |
| chr15 | 51684201 | 51684366 |
| chr15 | 51684511 | 51684606 |
| chr15 | 51781901 | 51782016 |
| chr15 | 51782051 | 51782176 |
| chr15 | 51874501 | 51874596 |
| chr15 | 52294661 | 52294806 |
| chr15 | 52419651 | 52419756 |
| chr15 | 52962991 | 52963106 |
| chr15 | 52975991 | 52976266 |
| chr15 | 53029971 | 53030156 |
| chr15 | 53037951 | 53038076 |
| chr15 | 53042301 | 53042476 |
| chr15 | 53046001 | 53046136 |

|       |          |          |
|-------|----------|----------|
| chr15 | 53046611 | 53046736 |
| chr15 | 53067221 | 53067376 |
| chr15 | 53082941 | 53083096 |
| chr15 | 53115621 | 53115826 |
| chr15 | 53116301 | 53116436 |
| chr15 | 53147111 | 53147246 |
| chr15 | 54086541 | 54086636 |
| chr15 | 54965651 | 54965786 |
| chr15 | 55079341 | 55079466 |
| chr15 | 55096191 | 55096486 |
| chr15 | 55271181 | 55271376 |
| chr15 | 55610091 | 55610276 |
| chr15 | 55857471 | 55857576 |
| chr15 | 56256301 | 56256406 |
| chr15 | 56286451 | 56286576 |
| chr15 | 56453811 | 56453966 |
| chr15 | 56574501 | 56574656 |
| chr15 | 56686911 | 56687026 |
| chr15 | 56688501 | 56688646 |
| chr15 | 56870561 | 56870796 |
| chr15 | 57422081 | 57422476 |
| chr15 | 57542551 | 57542656 |
| chr15 | 57575361 | 57575506 |
| chr15 | 57575541 | 57575946 |
| chr15 | 57588721 | 57589276 |
| chr15 | 57639241 | 57639436 |
| chr15 | 57705711 | 57705846 |
| chr15 | 57705861 | 57705976 |
| chr15 | 57706191 | 57706386 |
| chr15 | 58096021 | 58096136 |
| chr15 | 58096641 | 58096846 |
| chr15 | 58300721 | 58300896 |
| chr15 | 58346231 | 58346376 |
| chr15 | 58374411 | 58374506 |
| chr15 | 58468341 | 58468546 |
| chr15 | 58517281 | 58517416 |
| chr15 | 58521301 | 58521406 |
| chr15 | 58521431 | 58521566 |
| chr15 | 58591871 | 58592066 |
| chr15 | 58806971 | 58807086 |
| chr15 | 58807291 | 58807496 |
| chr15 | 58809431 | 58809796 |
| chr15 | 58817931 | 58818396 |
| chr15 | 58822821 | 58823196 |
| chr15 | 58840991 | 58841156 |
| chr15 | 58896351 | 58896676 |
| chr15 | 58907471 | 58907616 |
| chr15 | 59613391 | 59613556 |
| chr15 | 59613691 | 59614036 |
| chr15 | 59614341 | 59614536 |
| chr15 | 59656001 | 59656156 |
| chr15 | 60140391 | 60140516 |
| chr15 | 60671541 | 60671656 |

|       |          |          |
|-------|----------|----------|
| chr15 | 60683161 | 60683256 |
| chr15 | 60797541 | 60797686 |
| chr15 | 60799861 | 60799986 |
| chr15 | 61013801 | 61013976 |
| chr15 | 61224911 | 61225136 |
| chr15 | 61958111 | 61958476 |
| chr15 | 61958571 | 61958776 |
| chr15 | 62063201 | 62063346 |
| chr15 | 62295091 | 62295236 |
| chr15 | 62300421 | 62300586 |
| chr15 | 62300671 | 62300806 |
| chr15 | 62330831 | 62330966 |
| chr15 | 62589161 | 62589276 |
| chr15 | 62993361 | 62993476 |
| chr15 | 63522571 | 63522736 |
| chr15 | 63552831 | 63552936 |
| chr15 | 63580011 | 63580266 |
| chr15 | 63585271 | 63585436 |
| chr15 | 63588071 | 63588226 |
| chr15 | 63857551 | 63857696 |
| chr15 | 63872911 | 63873076 |
| chr15 | 63874001 | 63874246 |
| chr15 | 64087841 | 64087916 |
| chr15 | 64088471 | 64088736 |
| chr15 | 64097181 | 64097516 |
| chr15 | 64102931 | 64103056 |
| chr15 | 64111601 | 64111756 |
| chr15 | 64363861 | 64364126 |
| chr15 | 66154201 | 66154366 |
| chr15 | 66721121 | 66721196 |
| chr15 | 66814571 | 66814766 |
| chr15 | 66950951 | 66951106 |
| chr15 | 67463951 | 67464056 |
| chr15 | 67464281 | 67464356 |
| chr15 | 68047901 | 68047996 |
| chr15 | 68710551 | 68710616 |
| chr15 | 68711261 | 68711396 |
| chr15 | 68772851 | 68773016 |
| chr15 | 68790871 | 68790996 |
| chr15 | 68791091 | 68791216 |
| chr15 | 68891801 | 68892016 |
| chr15 | 72485031 | 72485156 |
| chr15 | 72664861 | 72664956 |
| chr15 | 72728511 | 72728626 |
| chr15 | 72798641 | 72798736 |
| chr15 | 72812921 | 72813116 |
| chr15 | 72813161 | 72813336 |
| chr15 | 72813771 | 72814126 |
| chr15 | 72847111 | 72847216 |
| chr15 | 72863981 | 72864076 |
| chr15 | 72972231 | 72972416 |
| chr15 | 73388551 | 73388716 |
| chr15 | 73684241 | 73684406 |

|       |          |          |
|-------|----------|----------|
| chr15 | 73692161 | 73692276 |
| chr15 | 73808561 | 73808766 |
| chr15 | 73809341 | 73809536 |
| chr15 | 73809691 | 73809926 |
| chr15 | 73983371 | 73983586 |
| chr15 | 73983821 | 73983886 |
| chr15 | 73989351 | 73989476 |
| chr15 | 73989601 | 73989706 |
| chr15 | 74052741 | 74052836 |
| chr15 | 74152941 | 74153116 |
| chr15 | 75524201 | 75524316 |
| chr15 | 75551431 | 75551626 |
| chr15 | 75622721 | 75622866 |
| chr15 | 75823951 | 75824106 |
| chr15 | 76288971 | 76289136 |
| chr15 | 76289261 | 76289796 |
| chr15 | 76290941 | 76291376 |
| chr15 | 76292771 | 76292846 |
| chr15 | 76292931 | 76293026 |
| chr15 | 76841041 | 76841296 |
| chr15 | 76841341 | 76841556 |
| chr15 | 76864971 | 76865186 |
| chr15 | 77042121 | 77042256 |
| chr15 | 77183771 | 77183936 |
| chr15 | 77184011 | 77184146 |
| chr15 | 77269661 | 77269786 |
| chr15 | 77624121 | 77624226 |
| chr15 | 77626051 | 77626236 |
| chr15 | 77648811 | 77648926 |
| chr15 | 77661551 | 77661686 |
| chr15 | 77683881 | 77684016 |
| chr15 | 77737441 | 77737556 |
| chr15 | 78004571 | 78004716 |
| chr15 | 78205891 | 78206046 |
| chr15 | 78299221 | 78299496 |
| chr15 | 78658991 | 78659256 |
| chr15 | 78659601 | 78659716 |
| chr15 | 78662711 | 78662906 |
| chr15 | 78663331 | 78663546 |
| chr15 | 78672291 | 78672436 |
| chr15 | 78695691 | 78696016 |
| chr15 | 78716871 | 78717036 |
| chr15 | 78752411 | 78752576 |
| chr15 | 78838931 | 78839036 |
| chr15 | 78857231 | 78857376 |
| chr15 | 78872161 | 78872276 |
| chr15 | 79040881 | 79041026 |
| chr15 | 79041611 | 79041736 |
| chr15 | 79089621 | 79089766 |
| chr15 | 79187381 | 79187556 |
| chr15 | 79454241 | 79454356 |
| chr15 | 79454381 | 79454466 |
| chr15 | 79454551 | 79454656 |



|       |          |          |
|-------|----------|----------|
| chr15 | 79454701 | 79454826 |
| chr15 | 79525201 | 79525336 |
| chr15 | 79656211 | 79656306 |
| chr15 | 79720891 | 79721076 |
| chr15 | 79732531 | 79732696 |
| chr15 | 79770021 | 79770156 |
| chr15 | 79779371 | 79779466 |
| chr15 | 79887081 | 79887236 |
| chr15 | 80000331 | 80000526 |
| chr15 | 80044811 | 80044936 |
| chr15 | 80194211 | 80194486 |
| chr15 | 80240811 | 80241036 |
| chr15 | 80306231 | 80306356 |
| chr15 | 80404531 | 80404706 |
| chr15 | 80516101 | 80516296 |
| chr15 | 80612121 | 80612236 |
| chr15 | 80872421 | 80872556 |
| chr15 | 81075051 | 81075236 |
| chr15 | 81105191 | 81105336 |
| chr15 | 81105431 | 81105576 |
| chr15 | 81138331 | 81138486 |
| chr15 | 81577341 | 81577496 |
| chr15 | 81988521 | 81988666 |
| chr15 | 81994551 | 81994806 |
| chr15 | 82063541 | 82063646 |
| chr15 | 82186711 | 82186836 |
| chr15 | 82451491 | 82451676 |
| chr15 | 82738921 | 82739236 |
| chr15 | 82739351 | 82739506 |
| chr15 | 82754611 | 82754746 |
| chr15 | 82762551 | 82762646 |
| chr15 | 82762671 | 82762916 |
| chr15 | 82778201 | 82778416 |
| chr15 | 82780101 | 82780256 |
| chr15 | 82816661 | 82816806 |
| chr15 | 82823091 | 82823236 |
| chr15 | 82835251 | 82835426 |
| chr15 | 82836891 | 82837086 |
| chr15 | 82838191 | 82838586 |
| chr15 | 82862401 | 82862646 |
| chr15 | 83351441 | 83351566 |
| chr15 | 83494421 | 83494536 |
| chr15 | 83505661 | 83505856 |
| chr15 | 83506431 | 83506606 |
| chr15 | 83537561 | 83538226 |
| chr15 | 83562241 | 83562366 |
| chr15 | 83562521 | 83562746 |
| chr15 | 83562781 | 83562906 |
| chr15 | 83568921 | 83569086 |
| chr15 | 83673541 | 83673756 |
| chr15 | 83673791 | 83673986 |
| chr15 | 83726551 | 83726816 |
| chr15 | 83790641 | 83790796 |

|       |          |          |
|-------|----------|----------|
| chr15 | 83826161 | 83826256 |
| chr15 | 83902411 | 83902546 |
| chr15 | 83914201 | 83914386 |
| chr15 | 83964381 | 83964546 |
| chr15 | 84046311 | 84046656 |
| chr15 | 84046771 | 84046876 |
| chr15 | 84055931 | 84056106 |
| chr15 | 84066341 | 84066656 |
| chr15 | 84106911 | 84107056 |
| chr15 | 84126561 | 84126996 |
| chr15 | 84141401 | 84141556 |
| chr15 | 84186971 | 84187246 |
| chr15 | 84216701 | 84216876 |
| chr15 | 84309121 | 84309256 |
| chr15 | 84332691 | 84332826 |
| chr15 | 84354681 | 84355066 |
| chr15 | 84428011 | 84428166 |
| chr15 | 84428171 | 84428316 |
| chr15 | 84540371 | 84540626 |
| chr15 | 84554071 | 84554206 |
| chr15 | 84559441 | 84559546 |
| chr15 | 84559761 | 84559906 |
| chr15 | 84571441 | 84571506 |
| chr15 | 84571761 | 84571866 |
| chr15 | 84581301 | 84581626 |
| chr15 | 84603201 | 84603346 |
| chr15 | 84603551 | 84603716 |
| chr15 | 84662241 | 84662486 |
| chr15 | 84670431 | 84670506 |
| chr15 | 84839881 | 84840006 |
| chr15 | 84840191 | 84840326 |
| chr15 | 84979541 | 84979686 |
| chr15 | 85095061 | 85095156 |
| chr15 | 85165181 | 85165276 |
| chr15 | 85366221 | 85366396 |
| chr15 | 85747511 | 85747966 |
| chr15 | 85821701 | 85821836 |
| chr15 | 85833951 | 85834116 |
| chr15 | 85912851 | 85913076 |
| chr15 | 85917761 | 85917926 |
| chr15 | 85918041 | 85918246 |
| chr15 | 85930441 | 85930616 |
| chr15 | 85941101 | 85941216 |
| chr15 | 87466121 | 87466266 |
| chr15 | 87488501 | 87488716 |
| chr15 | 87684961 | 87685106 |
| chr15 | 87731071 | 87731196 |
| chr15 | 87731371 | 87731506 |
| chr15 | 87738841 | 87738986 |
| chr15 | 87738991 | 87739166 |
| chr15 | 87864201 | 87864316 |
| chr15 | 87864421 | 87864616 |
| chr15 | 87900331 | 87900516 |

|       |          |          |
|-------|----------|----------|
| chr15 | 88073771 | 88073876 |
| chr15 | 88155701 | 88155856 |
| chr15 | 88188391 | 88188496 |
| chr15 | 88188591 | 88188736 |
| chr15 | 88209261 | 88209626 |
| chr15 | 88306781 | 88306906 |
| chr15 | 88317651 | 88317766 |
| chr15 | 88318651 | 88318816 |
| chr15 | 88389171 | 88389446 |
| chr15 | 88446051 | 88446216 |
| chr15 | 88721721 | 88721816 |
| chr15 | 88997001 | 88997236 |
| chr15 | 89324311 | 89324466 |
| chr15 | 89643961 | 89644106 |
| chr15 | 90104661 | 90104816 |
| chr15 | 90160811 | 90160936 |
| chr15 | 90417481 | 90417606 |
| chr15 | 90441951 | 90442096 |
| chr15 | 90444071 | 90444206 |
| chr15 | 90531721 | 90531896 |
| chr15 | 90647781 | 90648076 |
| chr15 | 90800301 | 90800436 |
| chr15 | 90828141 | 90828426 |
| chr15 | 90835071 | 90835326 |
| chr15 | 90845031 | 90845156 |
| chr15 | 90856871 | 90856986 |
| chr15 | 90862041 | 90862136 |
| chr15 | 90869321 | 90869536 |
| chr15 | 90931671 | 90931796 |
| chr15 | 91206541 | 91206696 |
| chr15 | 91206831 | 91207086 |
| chr15 | 91501921 | 91502016 |
| chr15 | 91784831 | 91784976 |
| chr15 | 92005801 | 92005966 |
| chr15 | 92095021 | 92095156 |
| chr15 | 92099951 | 92100126 |
| chr15 | 92237341 | 92237466 |
| chr15 | 92269931 | 92270346 |
| chr15 | 92323931 | 92324076 |
| chr15 | 92328941 | 92329076 |
| chr15 | 92338971 | 92339156 |
| chr15 | 92350871 | 92351016 |
| chr15 | 92351581 | 92351736 |
| chr15 | 92427711 | 92427806 |
| chr15 | 92439561 | 92439806 |
| chr15 | 92461881 | 92461976 |
| chr15 | 92531451 | 92531626 |
| chr15 | 92578301 | 92578446 |
| chr15 | 92578451 | 92578536 |
| chr15 | 92580351 | 92580776 |
| chr15 | 92636791 | 92636976 |
| chr15 | 92771211 | 92771316 |
| chr15 | 93080091 | 93080396 |

|       |          |          |
|-------|----------|----------|
| chr15 | 93080421 | 93080576 |
| chr15 | 93088271 | 93088386 |
| chr15 | 93137301 | 93137456 |
| chr15 | 93339251 | 93339386 |
| chr15 | 93343311 | 93343476 |
| chr15 | 93358071 | 93358466 |
| chr15 | 93361131 | 93361356 |
| chr15 | 93367101 | 93367346 |
| chr15 | 93370441 | 93370576 |
| chr15 | 93399131 | 93399526 |
| chr15 | 93404651 | 93404806 |
| chr15 | 93408131 | 93408276 |
| chr15 | 93489531 | 93489746 |
| chr15 | 93524841 | 93525046 |
| chr15 | 93529361 | 93529446 |
| chr15 | 93529541 | 93529686 |
| chr15 | 93543721 | 93543836 |
| chr15 | 93572041 | 93572186 |
| chr15 | 93572511 | 93572606 |
| chr15 | 93572761 | 93572856 |
| chr15 | 93590881 | 93591066 |
| chr15 | 93602111 | 93602416 |
| chr15 | 93603651 | 93603796 |
| chr15 | 93614871 | 93615126 |
| chr15 | 93618011 | 93618196 |
| chr15 | 93618491 | 93618996 |
| chr15 | 93650351 | 93650506 |
| chr15 | 93674021 | 93674156 |
| chr15 | 93702461 | 93702686 |
| chr15 | 93708621 | 93708776 |
| chr15 | 93735671 | 93735836 |
| chr15 | 93735961 | 93736156 |
| chr15 | 93739131 | 93739626 |
| chr15 | 93741301 | 93741426 |
| chr15 | 93803101 | 93803326 |
| chr15 | 93818541 | 93818656 |
| chr15 | 93822561 | 93822776 |
| chr15 | 93831331 | 93831426 |
| chr15 | 93831481 | 93831616 |
| chr15 | 93835891 | 93836016 |
| chr15 | 94049181 | 94049656 |
| chr15 | 94477781 | 94478206 |
| chr15 | 94478221 | 94478356 |
| chr15 | 94479151 | 94479266 |
| chr15 | 94483061 | 94483156 |
| chr15 | 94489221 | 94489366 |
| chr15 | 94627231 | 94627366 |
| chr15 | 94732991 | 94733086 |
| chr15 | 94839651 | 94839776 |
| chr15 | 95390651 | 95390776 |
| chr15 | 95390811 | 95390946 |
| chr15 | 95467681 | 95467856 |
| chr15 | 95467881 | 95468026 |

|       |          |          |
|-------|----------|----------|
| chr15 | 95629721 | 95629846 |
| chr15 | 95708821 | 95708986 |
| chr15 | 95709001 | 95709116 |
| chr15 | 95732511 | 95732576 |
| chr15 | 95759481 | 95759606 |
| chr15 | 95759651 | 95759736 |
| chr15 | 95769311 | 95769436 |
| chr15 | 95791231 | 95791336 |
| chr15 | 95815301 | 95815466 |
| chr15 | 95863371 | 95863606 |
| chr15 | 95921051 | 95921316 |
| chr15 | 95962111 | 95962256 |
| chr15 | 96161431 | 96161526 |
| chr15 | 96172631 | 96172776 |
| chr15 | 96174131 | 96174236 |
| chr15 | 96290291 | 96290436 |
| chr15 | 96317071 | 96317196 |
| chr15 | 96317681 | 96317796 |
| chr15 | 96352221 | 96352336 |
| chr15 | 96420411 | 96420526 |
| chr15 | 96507031 | 96507216 |
| chr15 | 96532781 | 96532926 |
| chr15 | 96565901 | 96566066 |
| chr15 | 96711881 | 96712086 |
| chr15 | 96858831 | 96858946 |
| chr15 | 96861691 | 96861806 |
| chr15 | 96894081 | 96894256 |
| chr15 | 96936041 | 96936226 |
| chr15 | 97208821 | 97208986 |
| chr15 | 97297021 | 97297116 |
| chr15 | 97317561 | 97317716 |
| chr15 | 97441331 | 97441516 |
| chr15 | 97649411 | 97649526 |
| chr15 | 97682301 | 97682486 |
| chr15 | 97742431 | 97742666 |
| chr15 | 97825021 | 97825176 |
| chr15 | 97968101 | 97968266 |
| chr15 | 98354151 | 98354326 |
| chr15 | 98371751 | 98371976 |
| chr15 | 98435611 | 98435766 |
| chr15 | 98444741 | 98444916 |
| chr15 | 98451341 | 98451506 |
| chr15 | 98457191 | 98457456 |
| chr15 | 98458471 | 98458696 |
| chr15 | 98503251 | 98503436 |
| chr15 | 98687291 | 98687446 |
| chr15 | 98806821 | 98807066 |
| chr15 | 98811471 | 98811856 |
| chr15 | 98812801 | 98812936 |
| chr15 | 98813921 | 98814016 |
| chr15 | 98816771 | 98816926 |
| chr15 | 98825481 | 98825626 |
| chr15 | 98826201 | 98826356 |

|       |           |           |
|-------|-----------|-----------|
| chr15 | 99248921  | 99249086  |
| chr15 | 99330401  | 99330526  |
| chr15 | 99435901  | 99436096  |
| chr15 | 99474051  | 99474216  |
| chr15 | 99477031  | 99477176  |
| chr15 | 99507091  | 99507206  |
| chr15 | 99552111  | 99552336  |
| chr15 | 99552831  | 99552976  |
| chr15 | 99627731  | 99627916  |
| chr15 | 99630021  | 99630576  |
| chr15 | 99634371  | 99634796  |
| chr15 | 99647071  | 99647266  |
| chr15 | 99664721  | 99664906  |
| chr15 | 99665081  | 99665176  |
| chr15 | 99666971  | 99667306  |
| chr15 | 99674911  | 99675066  |
| chr15 | 99676031  | 99676436  |
| chr15 | 99690081  | 99690346  |
| chr15 | 99690511  | 99690786  |
| chr15 | 99690831  | 99690966  |
| chr15 | 99693571  | 99693876  |
| chr15 | 99693901  | 99694156  |
| chr15 | 99694631  | 99694846  |
| chr15 | 99695971  | 99696116  |
| chr15 | 99696471  | 99696606  |
| chr15 | 99717721  | 99717836  |
| chr15 | 99718601  | 99719026  |
| chr15 | 99725161  | 99725336  |
| chr15 | 99730911  | 99731056  |
| chr15 | 99869151  | 99869296  |
| chr15 | 99881071  | 99881236  |
| chr15 | 99894971  | 99895066  |
| chr15 | 99898901  | 99899126  |
| chr15 | 99939991  | 99940116  |
| chr15 | 99941121  | 99941266  |
| chr15 | 99941281  | 99941536  |
| chr15 | 99942031  | 99942186  |
| chr15 | 100009351 | 100009496 |
| chr15 | 100009511 | 100009576 |
| chr15 | 100158841 | 100158996 |
| chr15 | 100176181 | 100176306 |
| chr15 | 100217141 | 100217236 |
| chr15 | 100314711 | 100314886 |
| chr15 | 100317421 | 100317616 |
| chr15 | 100473561 | 100473746 |
| chr15 | 100492171 | 100492336 |
| chr15 | 100493941 | 100494346 |
| chr15 | 100494901 | 100495266 |
| chr15 | 100495321 | 100495486 |
| chr15 | 100495501 | 100495636 |
| chr15 | 100507261 | 100507416 |
| chr15 | 100515271 | 100515366 |
| chr15 | 100576491 | 100576646 |

|       |           |           |
|-------|-----------|-----------|
| chr15 | 100603381 | 100603536 |
| chr15 | 100605441 | 100605676 |
| chr15 | 100617871 | 100618156 |
| chr15 | 100707301 | 100707446 |
| chr15 | 100737511 | 100737656 |
| chr15 | 100763971 | 100764086 |
| chr15 | 100764161 | 100764436 |
| chr15 | 100879881 | 100880006 |
| chr15 | 100880191 | 100880336 |
| chr15 | 100880411 | 100880506 |
| chr15 | 100892971 | 100893086 |
| chr15 | 100894391 | 100894556 |
| chr15 | 100895331 | 100895656 |
| chr15 | 100897741 | 100897986 |
| chr15 | 100903841 | 100903946 |
| chr15 | 100904241 | 100904426 |
| chr15 | 100908481 | 100908626 |
| chr15 | 100908771 | 100908936 |
| chr15 | 100929111 | 100929276 |
| chr15 | 100930341 | 100930426 |
| chr15 | 101008781 | 101008946 |
| chr15 | 101010101 | 101010306 |
| chr15 | 101010431 | 101010576 |
| chr15 | 101011261 | 101011356 |
| chr15 | 101023431 | 101023656 |
| chr15 | 101034521 | 101034726 |
| chr15 | 101063221 | 101063376 |
| chr15 | 101063771 | 101064606 |
| chr15 | 101070081 | 101070246 |
| chr15 | 101137501 | 101137616 |
| chr15 | 101147061 | 101147336 |
| chr15 | 101147371 | 101147476 |
| chr15 | 101277131 | 101277286 |
| chr15 | 101386211 | 101386486 |
| chr15 | 101931801 | 101932166 |
| chr15 | 101961131 | 101961276 |
| chr15 | 102174131 | 102174336 |
| chr15 | 102210581 | 102210726 |
| chr15 | 102223151 | 102223246 |
| chr15 | 102572051 | 102572236 |
| chr15 | 102857161 | 102857426 |
| chr15 | 102858261 | 102858676 |
| chr15 | 102860691 | 102861196 |
| chr15 | 102866911 | 102867076 |
| chr15 | 102887491 | 102887736 |
| chr15 | 102888201 | 102888456 |
| chr15 | 102888521 | 102888626 |
| chr15 | 102888781 | 102888976 |
| chr15 | 102888981 | 102889176 |
| chr15 | 102889451 | 102889846 |
| chr15 | 102889881 | 102890026 |
| chr15 | 102890071 | 102890176 |
| chr15 | 102893651 | 102893936 |

|       |           |           |
|-------|-----------|-----------|
| chr15 | 102895411 | 102895606 |
| chr15 | 102897311 | 102897496 |
| chr15 | 102914531 | 102914696 |
| chr15 | 102934881 | 102935026 |
| chr15 | 102935801 | 102935896 |
| chr15 | 102936101 | 102936266 |
| chr15 | 102947541 | 102947736 |
| chr15 | 102948811 | 102948956 |
| chr15 | 102963481 | 102964076 |
| chr15 | 102964821 | 102964886 |
| chr15 | 102969871 | 102970046 |
| chr15 | 102984591 | 102984696 |
| chr15 | 102997941 | 102998436 |
| chr15 | 103118381 | 103118496 |
| chr15 | 103130481 | 103130636 |
| chr15 | 103169731 | 103169946 |
| chr15 | 103211061 | 103211266 |
| chr14 | 6606991   | 6607106   |
| chr14 | 6611631   | 6611916   |
| chr14 | 6613061   | 6613226   |
| chr14 | 6616741   | 6616886   |
| chr14 | 6633401   | 6633546   |
| chr14 | 6644151   | 6644286   |
| chr14 | 6701521   | 6701646   |
| chr14 | 6707071   | 6707216   |
| chr14 | 6885681   | 6885846   |
| chr14 | 7013561   | 7013966   |
| chr14 | 7162151   | 7162296   |
| chr14 | 7405131   | 7405316   |
| chr14 | 7405441   | 7405536   |
| chr14 | 8274491   | 8274656   |
| chr14 | 8391341   | 8391486   |
| chr14 | 8449461   | 8449586   |
| chr14 | 8521051   | 8521206   |
| chr14 | 9469861   | 9469996   |
| chr14 | 9918241   | 9918426   |
| chr14 | 10166491  | 10166636  |
| chr14 | 10325181  | 10325346  |
| chr14 | 10504461  | 10504596  |
| chr14 | 10512701  | 10512826  |
| chr14 | 10515831  | 10515926  |
| chr14 | 10673861  | 10674036  |
| chr14 | 10685801  | 10685966  |
| chr14 | 10695921  | 10696016  |
| chr14 | 10873201  | 10873436  |
| chr14 | 10906591  | 10906716  |
| chr14 | 11131201  | 11131296  |
| chr14 | 11131451  | 11131546  |
| chr14 | 11186671  | 11186826  |
| chr14 | 11186921  | 11187206  |
| chr14 | 11269801  | 11269926  |
| chr14 | 11269961  | 11270096  |
| chr14 | 11365721  | 11365866  |



|       |          |          |
|-------|----------|----------|
| chr14 | 12543341 | 12543456 |
| chr14 | 13793071 | 13793196 |
| chr14 | 15348531 | 15348626 |
| chr14 | 15362981 | 15363146 |
| chr14 | 15363191 | 15363276 |
| chr14 | 15367521 | 15367646 |
| chr14 | 15368221 | 15368406 |
| chr14 | 15398031 | 15398206 |
| chr14 | 15526521 | 15526706 |
| chr14 | 15528771 | 15528916 |
| chr14 | 15568031 | 15568196 |
| chr14 | 15634861 | 15635016 |
| chr14 | 15695201 | 15695536 |
| chr14 | 15903061 | 15903156 |
| chr14 | 18533331 | 18533466 |
| chr14 | 18550391 | 18550566 |
| chr14 | 18557761 | 18557926 |
| chr14 | 18560581 | 18560726 |
| chr14 | 18711031 | 18711106 |
| chr14 | 18711251 | 18711416 |
| chr14 | 18750481 | 18750686 |
| chr14 | 18752691 | 18752876 |
| chr14 | 18776361 | 18776526 |
| chr14 | 18776891 | 18776986 |
| chr14 | 18777181 | 18777306 |
| chr14 | 18782351 | 18782416 |
| chr14 | 18782671 | 18782786 |
| chr14 | 18816491 | 18816616 |
| chr14 | 18885761 | 18885916 |
| chr14 | 18998931 | 18999046 |
| chr14 | 19011611 | 19011736 |
| chr14 | 19011951 | 19012086 |
| chr14 | 19037711 | 19037806 |
| chr14 | 19080891 | 19081036 |
| chr14 | 19353841 | 19353996 |
| chr14 | 19564371 | 19564496 |
| chr14 | 19584781 | 19584906 |
| chr14 | 19585181 | 19585366 |
| chr14 | 19600541 | 19600706 |
| chr14 | 19954331 | 19954466 |
| chr14 | 20157731 | 20157886 |
| chr14 | 20293721 | 20293886 |
| chr14 | 20312201 | 20312336 |
| chr14 | 20321371 | 20321536 |
| chr14 | 20396291 | 20396496 |
| chr14 | 20470941 | 20471066 |
| chr14 | 20679951 | 20680606 |
| chr14 | 20680831 | 20681166 |
| chr14 | 20692241 | 20692796 |
| chr14 | 20693401 | 20693616 |
| chr14 | 20751171 | 20751676 |
| chr14 | 20756451 | 20756546 |
| chr14 | 20825501 | 20825596 |

|       |          |          |
|-------|----------|----------|
| chr14 | 20835701 | 20835896 |
| chr14 | 20840501 | 20840676 |
| chr14 | 20870311 | 20870416 |
| chr14 | 20870621 | 20870806 |
| chr14 | 20877851 | 20878196 |
| chr14 | 20878201 | 20878386 |
| chr14 | 20878521 | 20878666 |
| chr14 | 20884221 | 20884336 |
| chr14 | 20894491 | 20894606 |
| chr14 | 20903581 | 20903896 |
| chr14 | 20936001 | 20936206 |
| chr14 | 20936721 | 20936886 |
| chr14 | 20936971 | 20937066 |
| chr14 | 20940941 | 20941366 |
| chr14 | 20942791 | 20943126 |
| chr14 | 20943191 | 20943366 |
| chr14 | 20945561 | 20945676 |
| chr14 | 20956741 | 20956896 |
| chr14 | 20957271 | 20957476 |
| chr14 | 20957611 | 20957766 |
| chr14 | 20957811 | 20957996 |
| chr14 | 20963441 | 20963676 |
| chr14 | 20980781 | 20981056 |
| chr14 | 20986591 | 20986836 |
| chr14 | 20987071 | 20987336 |
| chr14 | 21001641 | 21001776 |
| chr14 | 21004451 | 21004636 |
| chr14 | 21044181 | 21044306 |
| chr14 | 21048061 | 21048296 |
| chr14 | 21057111 | 21057246 |
| chr14 | 21095821 | 21096186 |
| chr14 | 21132061 | 21132186 |
| chr14 | 21143971 | 21144086 |
| chr14 | 21146921 | 21147006 |
| chr14 | 21181811 | 21181946 |
| chr14 | 21182281 | 21182356 |
| chr14 | 21182371 | 21182656 |
| chr14 | 21228841 | 21229076 |
| chr14 | 21229111 | 21229496 |
| chr14 | 21262151 | 21262296 |
| chr14 | 21283531 | 21283826 |
| chr14 | 21283981 | 21284116 |
| chr14 | 21294441 | 21294696 |
| chr14 | 21318171 | 21318276 |
| chr14 | 21335211 | 21335396 |
| chr14 | 21335401 | 21335506 |
| chr14 | 21340781 | 21340886 |
| chr14 | 21365181 | 21365306 |
| chr14 | 21366101 | 21366256 |
| chr14 | 21366411 | 21366666 |
| chr14 | 21439801 | 21439976 |
| chr14 | 21440011 | 21440196 |
| chr14 | 21457001 | 21457216 |

|       |          |          |
|-------|----------|----------|
| chr14 | 21457431 | 21457556 |
| chr14 | 21468771 | 21468966 |
| chr14 | 21527391 | 21527546 |
| chr14 | 21533451 | 21533596 |
| chr14 | 21548811 | 21548986 |
| chr14 | 21571871 | 21572096 |
| chr14 | 21572281 | 21572406 |
| chr14 | 21602081 | 21602216 |
| chr14 | 21633191 | 21633346 |
| chr14 | 21652661 | 21652886 |
| chr14 | 21652911 | 21653036 |
| chr14 | 21904991 | 21905126 |
| chr14 | 21985271 | 21985446 |
| chr14 | 22021801 | 22021956 |
| chr14 | 22039341 | 22039406 |
| chr14 | 22177501 | 22177596 |
| chr14 | 22290831 | 22290986 |
| chr14 | 22471331 | 22471486 |
| chr14 | 22613011 | 22613126 |
| chr14 | 22734661 | 22734746 |
| chr14 | 22745741 | 22745876 |
| chr14 | 23051551 | 23051706 |
| chr14 | 23051821 | 23051956 |
| chr14 | 23340231 | 23340446 |
| chr14 | 23340941 | 23341186 |
| chr14 | 23354231 | 23354396 |
| chr14 | 23366861 | 23366996 |
| chr14 | 23367801 | 23367956 |
| chr14 | 23483391 | 23483536 |
| chr14 | 23483541 | 23483696 |
| chr14 | 23585071 | 23585266 |
| chr14 | 23640301 | 23640646 |
| chr14 | 23659281 | 23659436 |
| chr14 | 23660371 | 23660546 |
| chr14 | 23660561 | 23660726 |
| chr14 | 23748801 | 23748906 |
| chr14 | 23854831 | 23854976 |
| chr14 | 23863231 | 23863386 |
| chr14 | 23941381 | 23941766 |
| chr14 | 23957231 | 23957426 |
| chr14 | 23987451 | 23987596 |
| chr14 | 23987791 | 23987866 |
| chr14 | 24018841 | 24019016 |
| chr14 | 24019651 | 24019826 |
| chr14 | 24056041 | 24056196 |
| chr14 | 24066561 | 24066786 |
| chr14 | 24111111 | 24111246 |
| chr14 | 24111361 | 24111566 |
| chr14 | 24131471 | 24131566 |
| chr14 | 24155591 | 24155706 |
| chr14 | 24257481 | 24257616 |
| chr14 | 24284511 | 24284716 |
| chr14 | 24285191 | 24285346 |

|       |          |          |
|-------|----------|----------|
| chr14 | 24384811 | 24384906 |
| chr14 | 24422791 | 24422926 |
| chr14 | 24436821 | 24437036 |
| chr14 | 24454311 | 24454496 |
| chr14 | 24455421 | 24455826 |
| chr14 | 24567741 | 24567896 |
| chr14 | 24598431 | 24598656 |
| chr14 | 24681091 | 24681286 |
| chr14 | 25283121 | 25283296 |
| chr14 | 25283581 | 25283676 |
| chr14 | 25287981 | 25288116 |
| chr14 | 25378561 | 25378716 |
| chr14 | 25740471 | 25740646 |
| chr14 | 25740691 | 25740806 |
| chr14 | 25818581 | 25818926 |
| chr14 | 25821141 | 25821446 |
| chr14 | 25877521 | 25877776 |
| chr14 | 25877921 | 25878256 |
| chr14 | 25885371 | 25885766 |
| chr14 | 25896311 | 25896546 |
| chr14 | 25900611 | 25900746 |
| chr14 | 25911681 | 25911956 |
| chr14 | 26056991 | 26057156 |
| chr14 | 26113281 | 26113456 |
| chr14 | 26146441 | 26146626 |
| chr14 | 26156461 | 26156626 |
| chr14 | 26156841 | 26156926 |
| chr14 | 26168461 | 26168656 |
| chr14 | 26169051 | 26169226 |
| chr14 | 26536791 | 26536916 |
| chr14 | 26894981 | 26895166 |
| chr14 | 27079721 | 27079916 |
| chr14 | 27093401 | 27093556 |
| chr14 | 27202461 | 27202606 |
| chr14 | 27209231 | 27209336 |
| chr14 | 27268281 | 27268636 |
| chr14 | 27277601 | 27277706 |
| chr14 | 27277791 | 27277936 |
| chr14 | 27278821 | 27278946 |
| chr14 | 27378831 | 27378966 |
| chr14 | 27698261 | 27698416 |
| chr14 | 27706311 | 27706446 |
| chr14 | 27843021 | 27843136 |
| chr14 | 27867741 | 27867926 |
| chr14 | 28005801 | 28005986 |
| chr14 | 28006241 | 28006476 |
| chr14 | 28056461 | 28056606 |
| chr14 | 28389941 | 28390236 |
| chr14 | 28764871 | 28765016 |
| chr14 | 28967521 | 28967756 |
| chr14 | 28967771 | 28967866 |
| chr14 | 29137671 | 29137826 |
| chr14 | 29372971 | 29373066 |

|       |          |          |
|-------|----------|----------|
| chr14 | 29413551 | 29413706 |
| chr14 | 29413741 | 29414176 |
| chr14 | 29415701 | 29415816 |
| chr14 | 30233011 | 30233206 |
| chr14 | 30236211 | 30236356 |
| chr14 | 30263011 | 30263106 |
| chr14 | 30264101 | 30264196 |
| chr14 | 30394621 | 30394806 |
| chr14 | 30394971 | 30395086 |
| chr14 | 30490821 | 30491316 |
| chr14 | 30610361 | 30610676 |
| chr14 | 30720851 | 30721426 |
| chr14 | 30728471 | 30728676 |
| chr14 | 30817071 | 30817226 |
| chr14 | 31067671 | 31067846 |
| chr14 | 31208771 | 31208906 |
| chr14 | 31210271 | 31210436 |
| chr14 | 31210901 | 31211056 |
| chr14 | 31256561 | 31256666 |
| chr14 | 31370051 | 31370206 |
| chr14 | 31370271 | 31370376 |
| chr14 | 31382651 | 31382776 |
| chr14 | 31718431 | 31718596 |
| chr14 | 31806721 | 31806866 |
| chr14 | 31807511 | 31807756 |
| chr14 | 32119221 | 32119496 |
| chr14 | 32157161 | 32157256 |
| chr14 | 32192051 | 32192256 |
| chr14 | 32512881 | 32513016 |
| chr14 | 32558481 | 32558636 |
| chr14 | 32558881 | 32559026 |
| chr14 | 32748251 | 32748356 |
| chr14 | 32748381 | 32748526 |
| chr14 | 32902791 | 32902936 |
| chr14 | 32904691 | 32904806 |
| chr14 | 33081631 | 33081726 |
| chr14 | 33175451 | 33175546 |
| chr14 | 33203791 | 33204066 |
| chr14 | 33278871 | 33279066 |
| chr14 | 33592981 | 33593166 |
| chr14 | 33593221 | 33593466 |
| chr14 | 33593591 | 33593766 |
| chr14 | 33710101 | 33710336 |
| chr14 | 33873321 | 33873486 |
| chr14 | 33924801 | 33925036 |
| chr14 | 36196331 | 36196426 |
| chr14 | 37428281 | 37428406 |
| chr14 | 37616041 | 37616106 |
| chr14 | 37637841 | 37638026 |
| chr14 | 39739061 | 39739196 |
| chr14 | 39811961 | 39812116 |
| chr14 | 39812261 | 39812396 |
| chr14 | 39822351 | 39822476 |

|       |          |          |
|-------|----------|----------|
| chr14 | 39822581 | 39822676 |
| chr14 | 39822731 | 39822876 |
| chr14 | 39833571 | 39833726 |
| chr14 | 39913151 | 39913356 |
| chr14 | 44385611 | 44385756 |
| chr14 | 44394491 | 44394646 |
| chr14 | 44427621 | 44427746 |
| chr14 | 44644931 | 44645056 |
| chr14 | 44842671 | 44842916 |
| chr14 | 44842961 | 44843096 |
| chr14 | 44909651 | 44909866 |
| chr14 | 44911141 | 44911246 |
| chr14 | 44914311 | 44914476 |
| chr14 | 44982851 | 44983216 |
| chr14 | 45066601 | 45066946 |
| chr14 | 45067591 | 45067736 |
| chr14 | 45314351 | 45314626 |
| chr14 | 45413481 | 45413666 |
| chr14 | 45413751 | 45413826 |
| chr14 | 45488981 | 45489136 |
| chr14 | 45504991 | 45505106 |
| chr14 | 45507601 | 45507846 |
| chr14 | 45527141 | 45527286 |
| chr14 | 45535751 | 45535816 |
| chr14 | 45584041 | 45584136 |
| chr14 | 45584211 | 45584466 |
| chr14 | 45633411 | 45633576 |
| chr14 | 45863251 | 45863396 |
| chr14 | 45872801 | 45872906 |
| chr14 | 45878071 | 45878316 |
| chr14 | 45899691 | 45899806 |
| chr14 | 46286951 | 46287056 |
| chr14 | 46287091 | 46287466 |
| chr14 | 46556431 | 46556656 |
| chr14 | 46730321 | 46730476 |
| chr14 | 46730521 | 46730736 |
| chr14 | 46844101 | 46844226 |
| chr14 | 46923331 | 46923516 |
| chr14 | 46995321 | 46995446 |
| chr14 | 47059231 | 47059386 |
| chr14 | 47179281 | 47179416 |
| chr14 | 47216421 | 47216606 |
| chr14 | 47461161 | 47461396 |
| chr14 | 47487181 | 47487316 |
| chr14 | 47538651 | 47538816 |
| chr14 | 47634671 | 47634766 |
| chr14 | 47763251 | 47763426 |
| chr14 | 47802221 | 47802296 |
| chr14 | 47815761 | 47815846 |
| chr14 | 48216111 | 48216316 |
| chr14 | 49364331 | 49364406 |
| chr14 | 53055821 | 53055986 |
| chr14 | 53143471 | 53143566 |

|       |          |          |
|-------|----------|----------|
| chr14 | 53149171 | 53149266 |
| chr14 | 53149741 | 53149936 |
| chr14 | 53158581 | 53158806 |
| chr14 | 53162391 | 53162566 |
| chr14 | 53164061 | 53164276 |
| chr14 | 53165191 | 53165316 |
| chr14 | 53175901 | 53175996 |
| chr14 | 53189181 | 53189346 |
| chr14 | 53190131 | 53190296 |
| chr14 | 53190971 | 53191116 |
| chr14 | 53192661 | 53192786 |
| chr14 | 53202071 | 53202266 |
| chr14 | 53206991 | 53207196 |
| chr14 | 53207481 | 53207556 |
| chr14 | 53337001 | 53337376 |
| chr14 | 53353191 | 53353326 |
| chr14 | 53897451 | 53897606 |
| chr14 | 53948861 | 53949026 |
| chr14 | 54107321 | 54107546 |
| chr14 | 54425031 | 54425136 |
| chr14 | 54815921 | 54816086 |
| chr14 | 55533231 | 55533376 |
| chr14 | 56094261 | 56094416 |
| chr14 | 56094551 | 56094676 |
| chr14 | 56116341 | 56116626 |
| chr14 | 56298301 | 56298446 |
| chr14 | 56299051 | 56299226 |
| chr14 | 56585931 | 56586036 |
| chr14 | 56586801 | 56586976 |
| chr14 | 56587851 | 56587986 |
| chr14 | 56588421 | 56588576 |
| chr14 | 56841401 | 56841616 |
| chr14 | 56854121 | 56854246 |
| chr14 | 56922641 | 56922836 |
| chr14 | 56936001 | 56936146 |
| chr14 | 57063931 | 57064056 |
| chr14 | 57067271 | 57067486 |
| chr14 | 57219621 | 57219746 |
| chr14 | 57617421 | 57617656 |
| chr14 | 57736921 | 57737046 |
| chr14 | 57891531 | 57891736 |
| chr14 | 57941851 | 57941956 |
| chr14 | 58058081 | 58058366 |
| chr14 | 58432011 | 58432106 |
| chr14 | 58506091 | 58506326 |
| chr14 | 58583081 | 58583226 |
| chr14 | 58605631 | 58605776 |
| chr14 | 58645491 | 58645586 |
| chr14 | 58693761 | 58693866 |
| chr14 | 58761761 | 58761876 |
| chr14 | 58873841 | 58874056 |
| chr14 | 58874131 | 58874216 |
| chr14 | 58895351 | 58895506 |

|       |          |          |
|-------|----------|----------|
| chr14 | 58904201 | 58904386 |
| chr14 | 58904591 | 58904796 |
| chr14 | 58915241 | 58915426 |
| chr14 | 59363961 | 59364156 |
| chr14 | 59373491 | 59373606 |
| chr14 | 59511271 | 59511376 |
| chr14 | 59551721 | 59551996 |
| chr14 | 59566141 | 59566256 |
| chr14 | 59575341 | 59575526 |
| chr14 | 59591241 | 59591406 |
| chr14 | 59594061 | 59594196 |
| chr14 | 59595581 | 59595746 |
| chr14 | 59597251 | 59597586 |
| chr14 | 59641201 | 59641366 |
| chr14 | 59641581 | 59641786 |
| chr14 | 59643301 | 59643406 |
| chr14 | 59799201 | 59799446 |
| chr14 | 59812231 | 59812446 |
| chr14 | 59867071 | 59867376 |
| chr14 | 59867401 | 59867636 |
| chr14 | 59868951 | 59869086 |
| chr14 | 59930491 | 59930706 |
| chr14 | 59940401 | 59940496 |
| chr14 | 59978231 | 59978366 |
| chr14 | 59989061 | 59989216 |
| chr14 | 59994251 | 59994646 |
| chr14 | 60000871 | 60001056 |
| chr14 | 60349181 | 60349286 |
| chr14 | 60416461 | 60416616 |
| chr14 | 60651101 | 60651226 |
| chr14 | 60655371 | 60655506 |
| chr14 | 60690481 | 60690616 |
| chr14 | 60728141 | 60728246 |
| chr14 | 60733461 | 60733586 |
| chr14 | 60835111 | 60835236 |
| chr14 | 60902941 | 60903106 |
| chr14 | 60903701 | 60903936 |
| chr14 | 60940481 | 60940646 |
| chr14 | 60940691 | 60940766 |
| chr14 | 61129551 | 61129676 |
| chr14 | 61132771 | 61133156 |
| chr14 | 61255931 | 61256116 |
| chr14 | 61289991 | 61290146 |
| chr14 | 61300971 | 61301106 |
| chr14 | 61400641 | 61400756 |
| chr14 | 61787311 | 61787456 |
| chr14 | 61828411 | 61828766 |
| chr14 | 61833661 | 61833876 |
| chr14 | 62161921 | 62162046 |
| chr14 | 62185211 | 62185336 |
| chr14 | 62292981 | 62293076 |
| chr14 | 62297831 | 62297926 |
| chr14 | 62352411 | 62352616 |



|       |          |          |
|-------|----------|----------|
| chr14 | 62562191 | 62562386 |
| chr14 | 62562751 | 62562826 |
| chr14 | 62569621 | 62569826 |
| chr14 | 62608291 | 62608406 |
| chr14 | 62829821 | 62829976 |
| chr14 | 62830751 | 62830886 |
| chr14 | 62831351 | 62831466 |
| chr14 | 62837571 | 62837686 |
| chr14 | 63000301 | 63000436 |
| chr14 | 63009181 | 63009366 |
| chr14 | 63010011 | 63010196 |
| chr14 | 63018151 | 63018306 |
| chr14 | 63072641 | 63072796 |
| chr14 | 63277971 | 63278076 |
| chr14 | 63287371 | 63287506 |
| chr14 | 63393771 | 63393906 |
| chr14 | 63579101 | 63579276 |
| chr14 | 63592881 | 63592986 |
| chr14 | 63593871 | 63594006 |
| chr14 | 64072541 | 64072636 |
| chr14 | 64156891 | 64157056 |
| chr14 | 64334941 | 64335086 |
| chr14 | 64336741 | 64336936 |
| chr14 | 64342581 | 64342736 |
| chr14 | 64342781 | 64342906 |
| chr14 | 64376451 | 64376586 |
| chr14 | 64377341 | 64377776 |
| chr14 | 64378801 | 64378956 |
| chr14 | 64379051 | 64379506 |
| chr14 | 64387761 | 64388046 |
| chr14 | 64388251 | 64388426 |
| chr14 | 64669421 | 64669536 |
| chr14 | 64716411 | 64716526 |
| chr14 | 64755411 | 64755506 |
| chr14 | 64829401 | 64829556 |
| chr14 | 64857891 | 64858056 |
| chr14 | 64973461 | 64973786 |
| chr14 | 64977471 | 64977546 |
| chr14 | 65044161 | 65044306 |
| chr14 | 65044601 | 65044696 |
| chr14 | 65045431 | 65045746 |
| chr14 | 65182981 | 65183116 |
| chr14 | 65332621 | 65332776 |
| chr14 | 65447891 | 65448046 |
| chr14 | 65725931 | 65726056 |
| chr14 | 65745351 | 65745446 |
| chr14 | 65835991 | 65836136 |
| chr14 | 65866461 | 65866566 |
| chr14 | 66214861 | 66215156 |
| chr14 | 66227461 | 66227616 |
| chr14 | 66231761 | 66231876 |
| chr14 | 66233951 | 66234096 |
| chr14 | 66258151 | 66258326 |

|       |          |          |
|-------|----------|----------|
| chr14 | 66298721 | 66299136 |
| chr14 | 66343091 | 66343186 |
| chr14 | 66348341 | 66348606 |
| chr14 | 66433551 | 66433886 |
| chr14 | 66438791 | 66438906 |
| chr14 | 66522681 | 66523126 |
| chr14 | 66523311 | 66523626 |
| chr14 | 66544991 | 66545086 |
| chr14 | 66566661 | 66566796 |
| chr14 | 66566841 | 66566996 |
| chr14 | 66612801 | 66612956 |
| chr14 | 66784881 | 66785046 |
| chr14 | 66816041 | 66816146 |
| chr14 | 66879581 | 66879806 |
| chr14 | 66908571 | 66908676 |
| chr14 | 66908821 | 66908886 |
| chr14 | 66911011 | 66911206 |
| chr14 | 66993911 | 66994076 |
| chr14 | 66995531 | 66995656 |
| chr14 | 67136261 | 67136416 |
| chr14 | 67176211 | 67176366 |
| chr14 | 67273181 | 67273296 |
| chr14 | 67291451 | 67291636 |
| chr14 | 67888291 | 67888466 |
| chr14 | 67888511 | 67888686 |
| chr14 | 67934681 | 67934866 |
| chr14 | 68006921 | 68007036 |
| chr14 | 68317301 | 68317496 |
| chr14 | 68345541 | 68345756 |
| chr14 | 68421281 | 68421636 |
| chr14 | 68637321 | 68637476 |
| chr14 | 68669141 | 68669296 |
| chr14 | 68669611 | 68669706 |
| chr14 | 68736901 | 68737016 |
| chr14 | 68790741 | 68791006 |
| chr14 | 70543961 | 70544126 |
| chr14 | 70544251 | 70544426 |
| chr14 | 70893621 | 70894186 |
| chr14 | 71582701 | 71582916 |
| chr14 | 71622191 | 71622276 |
| chr14 | 71732431 | 71732586 |
| chr14 | 71839501 | 71839646 |
| chr14 | 71912121 | 71912266 |
| chr14 | 71988491 | 71988646 |
| chr14 | 72134491 | 72134646 |
| chr14 | 72136701 | 72136836 |
| chr14 | 73617081 | 73617256 |
| chr14 | 73618291 | 73618416 |
| chr14 | 73932081 | 73932166 |
| chr14 | 74129041 | 74129146 |
| chr14 | 74190051 | 74190176 |
| chr14 | 74357341 | 74357496 |
| chr14 | 74589511 | 74589776 |

|       |          |          |
|-------|----------|----------|
| chr14 | 74598241 | 74598336 |
| chr14 | 74786341 | 74786486 |
| chr14 | 74918011 | 74918196 |
| chr14 | 75066561 | 75066746 |
| chr14 | 75155011 | 75155156 |
| chr14 | 75262381 | 75262496 |
| chr14 | 75267021 | 75267136 |
| chr14 | 75267391 | 75267526 |
| chr14 | 75267811 | 75267946 |
| chr14 | 75409111 | 75409376 |
| chr14 | 75409411 | 75409536 |
| chr14 | 75422251 | 75422556 |
| chr14 | 76146271 | 76146426 |
| chr14 | 76321631 | 76321756 |
| chr14 | 76333631 | 76333776 |
| chr14 | 76360911 | 76361076 |
| chr14 | 76595411 | 76595536 |
| chr14 | 77064911 | 77065016 |
| chr14 | 77077201 | 77077576 |
| chr14 | 77670131 | 77670286 |
| chr14 | 77753931 | 77754056 |
| chr14 | 77755971 | 77756106 |
| chr14 | 77848071 | 77848216 |
| chr14 | 77937731 | 77937956 |
| chr14 | 78222881 | 78222976 |
| chr14 | 78405981 | 78406126 |
| chr14 | 78407251 | 78407396 |
| chr14 | 78435381 | 78435706 |
| chr14 | 78459151 | 78459246 |
| chr14 | 78476091 | 78476196 |
| chr14 | 78614441 | 78614566 |
| chr14 | 78615911 | 78616076 |
| chr14 | 78721071 | 78721196 |
| chr14 | 78821491 | 78821616 |
| chr14 | 79004331 | 79004536 |
| chr14 | 79220681 | 79220776 |
| chr14 | 79465491 | 79465586 |
| chr14 | 81710041 | 81710176 |
| chr14 | 85317141 | 85317286 |
| chr14 | 85319901 | 85320076 |
| chr14 | 85618741 | 85618906 |
| chr14 | 94965131 | 94965256 |
| chr14 | 96471641 | 96471746 |
| chr14 | 96956451 | 96956626 |
| chr14 | 96987611 | 96987776 |
| chr14 | 97057111 | 97057226 |
| chr14 | 97630431 | 97630596 |
| chr14 | 97902111 | 97902316 |
| chr14 | 98159171 | 98159236 |
| chr14 | 98162821 | 98162976 |
| chr14 | 98280241 | 98280346 |
| chr14 | 98474261 | 98474356 |
| chr14 | 98661691 | 98661776 |

|       |           |           |
|-------|-----------|-----------|
| chr14 | 99182941  | 99183066  |
| chr14 | 99258221  | 99258366  |
| chr14 | 99258501  | 99258626  |
| chr14 | 99333841  | 99333956  |
| chr14 | 99632521  | 99632616  |
| chr14 | 100692061 | 100692186 |
| chr14 | 102415531 | 102415616 |
| chr14 | 102708751 | 102708836 |
| chr14 | 102709221 | 102709326 |
| chr14 | 102784801 | 102785226 |
| chr14 | 102785281 | 102785526 |
| chr14 | 103182361 | 103182476 |
| chr14 | 103380791 | 103380916 |
| chr14 | 103788491 | 103788596 |
| chr14 | 103957031 | 103957136 |
| chr14 | 104385161 | 104385316 |
| chr14 | 104458371 | 104458456 |
| chr14 | 104570851 | 104571016 |
| chr14 | 104611771 | 104611886 |
| chr14 | 104701071 | 104701366 |
| chr14 | 104701531 | 104701676 |
| chr14 | 105199311 | 105199376 |
| chr14 | 105203881 | 105204046 |
| chr14 | 105491311 | 105491416 |
| chr14 | 112844331 | 112844506 |
| chr14 | 112876801 | 112876996 |
| chr14 | 113709991 | 113710106 |
| chr14 | 113719821 | 113720046 |
| chr14 | 113738441 | 113738626 |
| chr14 | 114409621 | 114409766 |
| chr14 | 115406891 | 115407036 |
| chr14 | 115751841 | 115751956 |
| chr14 | 115816981 | 115817166 |
| chr14 | 115825901 | 115826046 |
| chr14 | 116276601 | 116276746 |
| chr14 | 116660831 | 116660976 |
| chr14 | 116788581 | 116788736 |
| chr14 | 116813291 | 116813446 |
| chr14 | 116813561 | 116813836 |
| chr14 | 116904281 | 116904476 |
| chr14 | 116934701 | 116934996 |
| chr14 | 116963191 | 116963346 |
| chr14 | 116963451 | 116963556 |
| chr14 | 117206211 | 117206386 |
| chr14 | 117253071 | 117253316 |
| chr14 | 117319481 | 117319606 |
| chr14 | 117450241 | 117450426 |
| chr14 | 117602871 | 117603006 |
| chr14 | 117621121 | 117621216 |
| chr14 | 118148351 | 118148496 |
| chr14 | 118717281 | 118717446 |
| chr14 | 118932471 | 118932616 |
| chr14 | 119108831 | 119108996 |

|       |           |           |
|-------|-----------|-----------|
| chr14 | 119149561 | 119149776 |
| chr14 | 119412381 | 119412506 |
| chr14 | 119642821 | 119643006 |
| chr14 | 120233271 | 120233376 |
| chr14 | 120247781 | 120248096 |
| chr14 | 120257431 | 120257526 |
| chr14 | 120491091 | 120491196 |
| chr14 | 120701871 | 120702076 |
| chr14 | 120702201 | 120702356 |
| chr14 | 120916381 | 120916526 |
| chr14 | 121118361 | 121118466 |
| chr14 | 121508801 | 121509026 |
| chr14 | 121509601 | 121509786 |
| chr14 | 121537251 | 121537366 |
| chr14 | 121558781 | 121558926 |
| chr14 | 121562571 | 121562706 |
| chr14 | 121588821 | 121588986 |
| chr14 | 121857051 | 121857206 |
| chr14 | 123858571 | 123858696 |
| chr19 | 3333321   | 3333486   |
| chr19 | 3680891   | 3681006   |
| chr19 | 3815051   | 3815156   |
| chr19 | 3983601   | 3983716   |
| chr19 | 3991051   | 3991146   |
| chr19 | 4046101   | 4046226   |
| chr19 | 4046251   | 4046356   |
| chr19 | 4441781   | 4442116   |
| chr19 | 4455551   | 4455706   |
| chr19 | 5191151   | 5191326   |
| chr19 | 5798811   | 5798986   |
| chr19 | 5810121   | 5810386   |
| chr19 | 5955801   | 5955956   |
| chr19 | 6006941   | 6007106   |
| chr19 | 6007161   | 6007356   |
| chr19 | 6113171   | 6113306   |
| chr19 | 6348891   | 6349056   |
| chr19 | 6444851   | 6445076   |
| chr19 | 6530301   | 6530546   |
| chr19 | 6657441   | 6657556   |
| chr19 | 6923991   | 6924156   |
| chr19 | 7136261   | 7136386   |
| chr19 | 7146751   | 7146906   |
| chr19 | 7167351   | 7167446   |
| chr19 | 7201801   | 7201956   |
| chr19 | 7203821   | 7204006   |
| chr19 | 7204411   | 7204496   |
| chr19 | 7205251   | 7205406   |
| chr19 | 7205461   | 7205786   |
| chr19 | 7224681   | 7224846   |
| chr19 | 7252851   | 7252986   |
| chr19 | 7253011   | 7253526   |
| chr19 | 7377731   | 7377906   |
| chr19 | 7648281   | 7648456   |

|       |          |          |
|-------|----------|----------|
| chr19 | 8684981  | 8685126  |
| chr19 | 8685151  | 8685286  |
| chr19 | 10127891 | 10128006 |
| chr19 | 10244261 | 10244426 |
| chr19 | 10292181 | 10292436 |
| chr19 | 10375021 | 10375126 |
| chr19 | 10431041 | 10431236 |
| chr19 | 10480321 | 10480486 |
| chr19 | 10480801 | 10480926 |
| chr19 | 10481031 | 10481176 |
| chr19 | 10484481 | 10484606 |
| chr19 | 10489331 | 10489486 |
| chr19 | 11051311 | 11051426 |
| chr19 | 11051561 | 11051666 |
| chr19 | 11447751 | 11447866 |
| chr19 | 12071841 | 12072006 |
| chr19 | 12530581 | 12530756 |
| chr19 | 14483881 | 14484016 |
| chr19 | 14491431 | 14491546 |
| chr19 | 14493291 | 14493826 |
| chr19 | 14569341 | 14569566 |
| chr19 | 14575961 | 14576066 |
| chr19 | 14580451 | 14580576 |
| chr19 | 14585651 | 14585906 |
| chr19 | 14657341 | 14657556 |
| chr19 | 14662591 | 14662746 |
| chr19 | 14737421 | 14737536 |
| chr19 | 14844471 | 14844566 |
| chr19 | 14938771 | 14938896 |
| chr19 | 14955751 | 14955926 |
| chr19 | 14957931 | 14958286 |
| chr19 | 15395921 | 15396046 |
| chr19 | 15406701 | 15406846 |
| chr19 | 15407441 | 15407666 |
| chr19 | 15532391 | 15532596 |
| chr19 | 15532621 | 15532706 |
| chr19 | 15583621 | 15583996 |
| chr19 | 15858051 | 15858246 |
| chr19 | 15863551 | 15863686 |
| chr19 | 15868251 | 15868386 |
| chr19 | 15868421 | 15868616 |
| chr19 | 15887211 | 15887436 |
| chr19 | 15903881 | 15903996 |
| chr19 | 15904331 | 15904486 |
| chr19 | 16008441 | 16008616 |
| chr19 | 16040561 | 16040666 |
| chr19 | 16892411 | 16892596 |
| chr19 | 17070321 | 17070446 |
| chr19 | 17078431 | 17078566 |
| chr19 | 17207671 | 17207796 |
| chr19 | 17436761 | 17436956 |
| chr19 | 17717951 | 17718066 |
| chr19 | 18100121 | 18100236 |

|       |          |          |
|-------|----------|----------|
| chr19 | 18278271 | 18278416 |
| chr19 | 18487401 | 18487526 |
| chr19 | 18582571 | 18582726 |
| chr19 | 18645501 | 18645656 |
| chr19 | 18797391 | 18797486 |
| chr19 | 18923801 | 18923906 |
| chr19 | 18969451 | 18969766 |
| chr19 | 18999581 | 18999786 |
| chr19 | 19004841 | 19004956 |
| chr19 | 19071201 | 19071326 |
| chr19 | 19313711 | 19313826 |
| chr19 | 20189671 | 20189796 |
| chr19 | 20574391 | 20574526 |
| chr19 | 20574591 | 20574746 |
| chr19 | 20701501 | 20701636 |
| chr19 | 21233831 | 21233946 |
| chr19 | 21292571 | 21292716 |
| chr19 | 21368761 | 21368956 |
| chr19 | 21698001 | 21698116 |
| chr19 | 21805191 | 21805426 |
| chr19 | 21852941 | 21853156 |
| chr19 | 21854161 | 21854286 |
| chr19 | 21949781 | 21949936 |
| chr19 | 21965831 | 21965956 |
| chr19 | 22133491 | 22133626 |
| chr19 | 22514821 | 22514906 |
| chr19 | 22621951 | 22622066 |
| chr19 | 22702841 | 22703016 |
| chr19 | 22890841 | 22890976 |
| chr19 | 23343321 | 23343496 |
| chr19 | 23737401 | 23737526 |
| chr19 | 24201901 | 24202066 |
| chr19 | 24222551 | 24222766 |
| chr19 | 24226541 | 24226786 |
| chr19 | 24226901 | 24227036 |
| chr19 | 24251161 | 24251276 |
| chr19 | 24262251 | 24262426 |
| chr19 | 24267611 | 24267796 |
| chr19 | 24280451 | 24280556 |
| chr19 | 24288191 | 24288376 |
| chr19 | 24288411 | 24288556 |
| chr19 | 24309351 | 24309646 |
| chr19 | 24334211 | 24334386 |
| chr19 | 24335451 | 24335546 |
| chr19 | 24384011 | 24384556 |
| chr19 | 24438401 | 24438556 |
| chr19 | 24439281 | 24439446 |
| chr19 | 24439541 | 24439776 |
| chr19 | 24458831 | 24458986 |
| chr19 | 24520431 | 24520536 |
| chr19 | 24520591 | 24520876 |
| chr19 | 24575321 | 24575436 |
| chr19 | 24774261 | 24774386 |

|       |          |          |
|-------|----------|----------|
| chr19 | 24781531 | 24781666 |
| chr19 | 24915551 | 24915726 |
| chr19 | 25164681 | 25164886 |
| chr19 | 25172721 | 25172836 |
| chr19 | 25211981 | 25212126 |
| chr19 | 25274891 | 25275386 |
| chr19 | 25289031 | 25289266 |
| chr19 | 25316461 | 25316666 |
| chr19 | 25378881 | 25379046 |
| chr19 | 25424281 | 25424446 |
| chr19 | 25449141 | 25449456 |
| chr19 | 25525661 | 25525816 |
| chr19 | 25529121 | 25529266 |
| chr19 | 25564691 | 25564806 |
| chr19 | 25604281 | 25604416 |
| chr19 | 25641731 | 25641946 |
| chr19 | 25642601 | 25642986 |
| chr19 | 25652121 | 25652286 |
| chr19 | 25652811 | 25652896 |
| chr19 | 26534181 | 26534316 |
| chr19 | 26545361 | 26545496 |
| chr19 | 26545511 | 26545666 |
| chr19 | 26633011 | 26633166 |
| chr19 | 26707431 | 26707696 |
| chr19 | 26776311 | 26776466 |
| chr19 | 26932911 | 26933136 |
| chr19 | 26997721 | 26997896 |
| chr19 | 27076831 | 27076956 |
| chr19 | 27431641 | 27431806 |
| chr19 | 27968741 | 27968816 |
| chr19 | 28131321 | 28131456 |
| chr19 | 28161591 | 28161686 |
| chr19 | 28161691 | 28161956 |
| chr19 | 28233851 | 28233936 |
| chr19 | 28254471 | 28254606 |
| chr19 | 28265541 | 28265826 |
| chr19 | 28332901 | 28333076 |
| chr19 | 28333111 | 28333236 |
| chr19 | 28370091 | 28370216 |
| chr19 | 28394571 | 28394846 |
| chr19 | 28399081 | 28399146 |
| chr19 | 28412041 | 28412136 |
| chr19 | 28449961 | 28450046 |
| chr19 | 28460911 | 28461066 |
| chr19 | 28469111 | 28469306 |
| chr19 | 28519101 | 28519446 |
| chr19 | 28646101 | 28646246 |
| chr19 | 28723031 | 28723176 |
| chr19 | 28724141 | 28724286 |
| chr19 | 28753721 | 28754106 |
| chr19 | 29055521 | 29055646 |
| chr19 | 29126431 | 29126696 |
| chr19 | 29188081 | 29188246 |



|       |          |          |
|-------|----------|----------|
| chr19 | 29190961 | 29191166 |
| chr19 | 29216011 | 29216146 |
| chr19 | 29303211 | 29303366 |
| chr19 | 29416841 | 29416956 |
| chr19 | 29707271 | 29707416 |
| chr19 | 29721261 | 29721406 |
| chr19 | 29809801 | 29809916 |
| chr19 | 29987431 | 29987586 |
| chr19 | 29995261 | 29995366 |
| chr19 | 30010461 | 30010596 |
| chr19 | 30013151 | 30013406 |
| chr19 | 30013931 | 30014256 |
| chr19 | 30223161 | 30223276 |
| chr19 | 30369991 | 30370126 |
| chr19 | 30397011 | 30397236 |
| chr19 | 30420651 | 30420766 |
| chr19 | 30421151 | 30421246 |
| chr19 | 30459731 | 30459866 |
| chr19 | 30485921 | 30486176 |
| chr19 | 30512681 | 30512776 |
| chr19 | 30512811 | 30512986 |
| chr19 | 30576411 | 30576536 |
| chr19 | 30581311 | 30581456 |
| chr19 | 30582571 | 30582666 |
| chr19 | 30614291 | 30614486 |
| chr19 | 30630761 | 30630956 |
| chr19 | 30692171 | 30692316 |
| chr19 | 30921941 | 30922046 |
| chr19 | 31008761 | 31008956 |
| chr19 | 31013781 | 31013916 |
| chr19 | 31556041 | 31556246 |
| chr19 | 31817501 | 31817626 |
| chr19 | 32085761 | 32086086 |
| chr19 | 32168861 | 32169136 |
| chr19 | 32308371 | 32308476 |
| chr19 | 32327841 | 32327986 |
| chr19 | 32339391 | 32339476 |
| chr19 | 32385571 | 32385736 |
| chr19 | 32389051 | 32389266 |
| chr19 | 32403581 | 32403716 |
| chr19 | 32403891 | 32404126 |
| chr19 | 32410231 | 32410576 |
| chr19 | 32446111 | 32446226 |
| chr19 | 32452871 | 32452946 |
| chr19 | 32714111 | 32714226 |
| chr19 | 32714271 | 32714346 |
| chr19 | 32855221 | 32855356 |
| chr19 | 32858761 | 32858866 |
| chr19 | 33023641 | 33023756 |
| chr19 | 33035351 | 33035486 |
| chr19 | 33035551 | 33035746 |
| chr19 | 33037201 | 33037366 |
| chr19 | 34269611 | 34269736 |

|       |          |          |
|-------|----------|----------|
| chr19 | 34321311 | 34321376 |
| chr19 | 34819311 | 34819526 |
| chr19 | 36185151 | 36185316 |
| chr19 | 36278281 | 36278536 |
| chr19 | 36300371 | 36300486 |
| chr19 | 36601151 | 36601336 |
| chr19 | 36601371 | 36601496 |
| chr19 | 36864391 | 36864486 |
| chr19 | 36873651 | 36873796 |
| chr19 | 36880621 | 36880806 |
| chr19 | 36975671 | 36975826 |
| chr19 | 36976011 | 36976156 |
| chr19 | 36976731 | 36976896 |
| chr19 | 37023631 | 37023776 |
| chr19 | 37166521 | 37166676 |
| chr19 | 37329381 | 37329956 |
| chr19 | 37547991 | 37548186 |
| chr19 | 37594171 | 37594416 |
| chr19 | 37625811 | 37625906 |
| chr19 | 37648711 | 37648846 |
| chr19 | 37650501 | 37650636 |
| chr19 | 37701331 | 37701566 |
| chr19 | 37701751 | 37701876 |
| chr19 | 37767191 | 37767356 |
| chr19 | 37767661 | 37767816 |
| chr19 | 37808591 | 37808806 |
| chr19 | 37833341 | 37833436 |
| chr19 | 37854811 | 37855106 |
| chr19 | 37855681 | 37855836 |
| chr19 | 37855981 | 37856266 |
| chr19 | 37856321 | 37856466 |
| chr19 | 37879611 | 37879966 |
| chr19 | 37884841 | 37884976 |
| chr19 | 37961311 | 37961576 |
| chr19 | 37972551 | 37972766 |
| chr19 | 37972951 | 37973076 |
| chr19 | 38000481 | 38000686 |
| chr19 | 38090571 | 38090726 |
| chr19 | 38107541 | 38107686 |
| chr19 | 38199291 | 38199566 |
| chr19 | 38297791 | 38297956 |
| chr19 | 38423481 | 38423576 |
| chr19 | 38433641 | 38433896 |
| chr19 | 38437971 | 38438126 |
| chr19 | 38543511 | 38543666 |
| chr19 | 38572541 | 38572706 |
| chr19 | 38573521 | 38573686 |
| chr19 | 38586701 | 38586856 |
| chr19 | 38679341 | 38679456 |
| chr19 | 40321881 | 40322026 |
| chr19 | 40326061 | 40326246 |
| chr19 | 40326731 | 40326876 |
| chr19 | 40352581 | 40352716 |

|       |          |          |
|-------|----------|----------|
| chr19 | 40358941 | 40359066 |
| chr19 | 40371791 | 40372076 |
| chr19 | 40385141 | 40385426 |
| chr19 | 40546121 | 40546306 |
| chr19 | 40564261 | 40564466 |
| chr19 | 40565541 | 40565636 |
| chr19 | 40712091 | 40712206 |
| chr19 | 41013041 | 41013296 |
| chr19 | 41105461 | 41105726 |
| chr19 | 41156971 | 41157086 |
| chr19 | 41442631 | 41442816 |
| chr19 | 41498461 | 41498756 |
| chr19 | 41578001 | 41578096 |
| chr19 | 41705401 | 41705576 |
| chr19 | 41723081 | 41723476 |
| chr19 | 41723741 | 41723966 |
| chr19 | 41747341 | 41747546 |
| chr19 | 41750541 | 41750726 |
| chr19 | 41761201 | 41761496 |
| chr19 | 41769431 | 41769946 |
| chr19 | 41770661 | 41770816 |
| chr19 | 42062271 | 42062526 |
| chr19 | 42217531 | 42217746 |
| chr19 | 42264641 | 42264876 |
| chr19 | 42265231 | 42265526 |
| chr19 | 42268971 | 42269246 |
| chr19 | 42368451 | 42368656 |
| chr19 | 42372131 | 42372336 |
| chr19 | 42372371 | 42372616 |
| chr19 | 42422461 | 42422636 |
| chr19 | 42428321 | 42428456 |
| chr19 | 42447031 | 42447226 |
| chr19 | 42537031 | 42537126 |
| chr19 | 42550011 | 42550396 |
| chr19 | 42550891 | 42551016 |
| chr19 | 42600781 | 42600936 |
| chr19 | 42634161 | 42634356 |
| chr19 | 42645141 | 42645466 |
| chr19 | 42803221 | 42803746 |
| chr19 | 42819061 | 42819226 |
| chr19 | 42820411 | 42820786 |
| chr19 | 42936961 | 42937056 |
| chr19 | 43296161 | 43296336 |
| chr19 | 43556191 | 43556346 |
| chr19 | 43574591 | 43574686 |
| chr19 | 43599701 | 43599806 |
| chr19 | 43599991 | 43600086 |
| chr19 | 43600251 | 43600406 |
| chr19 | 43700221 | 43700336 |
| chr19 | 43748731 | 43748976 |
| chr19 | 43749041 | 43749156 |
| chr19 | 43764581 | 43764666 |
| chr19 | 43776991 | 43777106 |

|       |          |          |
|-------|----------|----------|
| chr19 | 43818541 | 43818666 |
| chr19 | 43936221 | 43936476 |
| chr19 | 43957821 | 43957986 |
| chr19 | 43958671 | 43958846 |
| chr19 | 43983351 | 43983606 |
| chr19 | 43983811 | 43983996 |
| chr19 | 44039391 | 44040096 |
| chr19 | 44299661 | 44299796 |
| chr19 | 44365241 | 44365386 |
| chr19 | 44367551 | 44367716 |
| chr19 | 44526331 | 44526476 |
| chr19 | 44566241 | 44566356 |
| chr19 | 44569581 | 44569676 |
| chr19 | 44712641 | 44712956 |
| chr19 | 44735091 | 44735306 |
| chr19 | 44752261 | 44752486 |
| chr19 | 44770471 | 44771136 |
| chr19 | 44772791 | 44772936 |
| chr19 | 44850031 | 44850196 |
| chr19 | 44850751 | 44850916 |
| chr19 | 44851261 | 44851376 |
| chr19 | 44855861 | 44855986 |
| chr19 | 44873881 | 44874006 |
| chr19 | 44902901 | 44903026 |
| chr19 | 44939091 | 44939206 |
| chr19 | 44943341 | 44943516 |
| chr19 | 44944891 | 44945026 |
| chr19 | 44946791 | 44946906 |
| chr19 | 44953251 | 44953366 |
| chr19 | 44954571 | 44954706 |
| chr19 | 44961561 | 44961706 |
| chr19 | 44961811 | 44962166 |
| chr19 | 44962391 | 44962576 |
| chr19 | 44978081 | 44978326 |
| chr19 | 44982511 | 44982666 |
| chr19 | 44982981 | 44983176 |
| chr19 | 45151691 | 45151786 |
| chr19 | 45157391 | 45157736 |
| chr19 | 45157751 | 45157926 |
| chr19 | 45158051 | 45158366 |
| chr19 | 45171721 | 45171866 |
| chr19 | 45171951 | 45172116 |
| chr19 | 45279071 | 45279176 |
| chr19 | 45316071 | 45316206 |
| chr19 | 45335981 | 45336096 |
| chr19 | 45422651 | 45422756 |
| chr19 | 45475411 | 45475656 |
| chr19 | 45475701 | 45475926 |
| chr19 | 45493941 | 45494096 |
| chr19 | 45495251 | 45495376 |
| chr19 | 45499911 | 45500056 |
| chr19 | 45500071 | 45500216 |
| chr19 | 45512171 | 45512446 |

|       |          |          |
|-------|----------|----------|
| chr19 | 45513371 | 45513956 |
| chr19 | 45514151 | 45514266 |
| chr19 | 45514321 | 45514606 |
| chr19 | 45529741 | 45529896 |
| chr19 | 45536081 | 45536276 |
| chr19 | 45546171 | 45546306 |
| chr19 | 45569141 | 45569316 |
| chr19 | 45602701 | 45602816 |
| chr19 | 45618751 | 45618916 |
| chr19 | 45619381 | 45619546 |
| chr19 | 45628771 | 45628996 |
| chr19 | 45629001 | 45629246 |
| chr19 | 45649271 | 45649556 |
| chr19 | 45675451 | 45675586 |
| chr19 | 45709041 | 45709156 |
| chr19 | 45744551 | 45744696 |
| chr19 | 45779141 | 45779346 |
| chr19 | 45864291 | 45864686 |
| chr19 | 45908771 | 45908956 |
| chr19 | 45973701 | 45973936 |
| chr19 | 46290141 | 46290256 |
| chr19 | 46489521 | 46489626 |
| chr19 | 46530881 | 46531036 |
| chr19 | 46587851 | 46588126 |
| chr19 | 46676601 | 46676986 |
| chr19 | 46677251 | 46677656 |
| chr19 | 46677681 | 46677786 |
| chr19 | 46781281 | 46781586 |
| chr19 | 46817801 | 46817976 |
| chr19 | 46819881 | 46820086 |
| chr19 | 46882261 | 46882516 |
| chr19 | 46884871 | 46884976 |
| chr19 | 47028701 | 47028856 |
| chr19 | 47035841 | 47036056 |
| chr19 | 47043331 | 47043396 |
| chr19 | 47239981 | 47240106 |
| chr19 | 47301141 | 47301236 |
| chr19 | 47368591 | 47368746 |
| chr19 | 47386581 | 47386726 |
| chr19 | 47388211 | 47388416 |
| chr19 | 47392651 | 47392786 |
| chr19 | 47475171 | 47475336 |
| chr19 | 47497041 | 47497286 |
| chr19 | 47497881 | 47498136 |
| chr19 | 47526171 | 47526496 |
| chr19 | 47866471 | 47866606 |
| chr19 | 47866661 | 47866836 |
| chr19 | 47866931 | 47867066 |
| chr19 | 47971011 | 47971116 |
| chr19 | 48047671 | 48047916 |
| chr19 | 48076481 | 48076606 |
| chr19 | 48103471 | 48103606 |
| chr19 | 48169061 | 48169266 |

|       |          |          |
|-------|----------|----------|
| chr19 | 48181531 | 48181626 |
| chr19 | 48439301 | 48439486 |
| chr19 | 48694031 | 48694106 |
| chr19 | 50239441 | 50239616 |
| chr19 | 50416031 | 50416246 |
| chr19 | 50432151 | 50432266 |
| chr19 | 50472251 | 50472366 |
| chr19 | 50477801 | 50478006 |
| chr19 | 50526321 | 50526496 |
| chr19 | 50528571 | 50528716 |
| chr19 | 50568781 | 50568896 |
| chr19 | 52875971 | 52876096 |
| chr19 | 52876741 | 52876846 |
| chr19 | 53181481 | 53181586 |
| chr19 | 53189731 | 53189826 |
| chr19 | 53248461 | 53248646 |
| chr19 | 53355921 | 53356016 |
| chr19 | 53458221 | 53458476 |
| chr19 | 53458551 | 53458816 |
| chr19 | 53461781 | 53461936 |
| chr19 | 53465661 | 53465956 |
| chr19 | 53498271 | 53498406 |
| chr19 | 53498421 | 53498626 |
| chr19 | 53504501 | 53504596 |
| chr19 | 53504701 | 53505056 |
| chr19 | 53564841 | 53565126 |
| chr19 | 53565201 | 53565346 |
| chr19 | 53605851 | 53606036 |
| chr19 | 53621471 | 53621596 |
| chr19 | 53703431 | 53703556 |
| chr19 | 53731261 | 53731436 |
| chr19 | 53751291 | 53751406 |
| chr19 | 53753231 | 53753316 |
| chr19 | 53827861 | 53827956 |
| chr19 | 53883741 | 53884056 |
| chr19 | 53885871 | 53886146 |
| chr19 | 54130401 | 54130636 |
| chr19 | 54160681 | 54160826 |
| chr19 | 54171051 | 54171156 |
| chr19 | 54171291 | 54171416 |
| chr19 | 54253761 | 54253856 |
| chr19 | 54312401 | 54312626 |
| chr19 | 54313231 | 54313456 |
| chr19 | 54453061 | 54453156 |
| chr19 | 55413891 | 55414136 |
| chr19 | 55434121 | 55434356 |
| chr19 | 55435511 | 55435666 |
| chr19 | 55466311 | 55466416 |
| chr19 | 55508891 | 55509046 |
| chr19 | 55509951 | 55510136 |
| chr19 | 55531861 | 55531936 |
| chr19 | 55535381 | 55535526 |
| chr19 | 55537971 | 55538126 |

|       |          |          |
|-------|----------|----------|
| chr19 | 55544711 | 55544816 |
| chr19 | 55552541 | 55552666 |
| chr19 | 55554451 | 55554576 |
| chr19 | 55555731 | 55555886 |
| chr19 | 55605741 | 55605846 |
| chr19 | 55611231 | 55611366 |
| chr19 | 55612641 | 55612926 |
| chr19 | 55613441 | 55613576 |
| chr19 | 55613681 | 55613786 |
| chr19 | 55618491 | 55618626 |
| chr19 | 55622791 | 55622936 |
| chr19 | 55631901 | 55632126 |
| chr19 | 55636551 | 55636846 |
| chr19 | 55639111 | 55639256 |
| chr19 | 55646691 | 55646876 |
| chr19 | 55649231 | 55649546 |
| chr19 | 55651291 | 55651406 |
| chr19 | 55675681 | 55675766 |
| chr19 | 55679941 | 55680076 |
| chr19 | 55696821 | 55697016 |
| chr19 | 55715821 | 55715996 |
| chr19 | 55722211 | 55722446 |
| chr19 | 55753611 | 55753826 |
| chr19 | 55759661 | 55759866 |
| chr19 | 55764721 | 55764906 |
| chr19 | 55803281 | 55803506 |
| chr19 | 55803911 | 55804016 |
| chr19 | 55804031 | 55804306 |
| chr19 | 55807631 | 55807786 |
| chr19 | 55817331 | 55817496 |
| chr19 | 55818931 | 55819096 |
| chr19 | 55819221 | 55819436 |
| chr19 | 55820451 | 55820656 |
| chr19 | 55831441 | 55831676 |
| chr19 | 55841661 | 55841746 |
| chr19 | 55847941 | 55848046 |
| chr19 | 55889431 | 55889556 |
| chr19 | 55891281 | 55891546 |
| chr19 | 55907971 | 55908066 |
| chr19 | 55930581 | 55930706 |
| chr19 | 55930891 | 55931026 |
| chr19 | 55953621 | 55953796 |
| chr19 | 55954671 | 55954786 |
| chr19 | 55956191 | 55956516 |
| chr19 | 55977491 | 55977666 |
| chr19 | 56082651 | 56083266 |
| chr19 | 56086971 | 56087116 |
| chr19 | 56341021 | 56341186 |
| chr19 | 56477571 | 56477866 |
| chr19 | 56655081 | 56655206 |
| chr19 | 56690551 | 56690656 |
| chr19 | 56705541 | 56705696 |
| chr19 | 56705711 | 56705916 |

|       |          |          |
|-------|----------|----------|
| chr19 | 56868431 | 56868576 |
| chr19 | 56868981 | 56869116 |
| chr19 | 57043861 | 57043986 |
| chr19 | 57062611 | 57062726 |
| chr19 | 57131541 | 57131696 |
| chr19 | 57164771 | 57164866 |
| chr19 | 57200311 | 57200436 |
| chr19 | 57201021 | 57201176 |
| chr19 | 57328621 | 57328786 |
| chr19 | 57328921 | 57329066 |
| chr19 | 57464761 | 57464986 |
| chr19 | 57465021 | 57465286 |
| chr19 | 57477421 | 57477586 |
| chr19 | 57487091 | 57487206 |
| chr19 | 57494841 | 57495236 |
| chr19 | 57526711 | 57526856 |
| chr19 | 57544361 | 57544566 |
| chr19 | 57560201 | 57560336 |
| chr19 | 57563621 | 57563716 |
| chr19 | 57596971 | 57597156 |
| chr19 | 57608651 | 57608756 |
| chr19 | 57612021 | 57612336 |
| chr19 | 57612461 | 57612696 |
| chr19 | 57630081 | 57630266 |
| chr19 | 57639521 | 57639726 |
| chr19 | 57681851 | 57681986 |
| chr19 | 57781331 | 57781516 |
| chr19 | 57850711 | 57850836 |
| chr19 | 57980411 | 57980646 |
| chr19 | 58015891 | 58016016 |
| chr19 | 58027321 | 58027436 |
| chr19 | 58039251 | 58039396 |
| chr19 | 58040411 | 58040526 |
| chr19 | 58105541 | 58105766 |
| chr19 | 58105781 | 58105906 |
| chr19 | 58114081 | 58114376 |
| chr19 | 58114501 | 58114596 |
| chr19 | 58116821 | 58116936 |
| chr19 | 58130221 | 58130346 |
| chr19 | 58178391 | 58178516 |
| chr19 | 58179581 | 58179736 |
| chr19 | 58191721 | 58191866 |
| chr19 | 58191901 | 58191976 |
| chr19 | 58218891 | 58219166 |
| chr19 | 58247651 | 58247776 |
| chr19 | 58273961 | 58274066 |
| chr19 | 58319951 | 58320106 |
| chr19 | 58363091 | 58363226 |
| chr19 | 58417991 | 58418256 |
| chr19 | 58449211 | 58449336 |
| chr19 | 58449501 | 58449686 |
| chr19 | 58466671 | 58466836 |
| chr19 | 58473261 | 58473396 |



|       |          |          |
|-------|----------|----------|
| chr19 | 58490661 | 58490936 |
| chr19 | 58503941 | 58504096 |
| chr19 | 58504211 | 58504316 |
| chr19 | 58575591 | 58575726 |
| chr19 | 58577081 | 58577296 |
| chr19 | 58577411 | 58577536 |
| chr19 | 58670031 | 58670126 |
| chr19 | 58797281 | 58797586 |
| chr19 | 59016361 | 59016496 |
| chr19 | 59021311 | 59021436 |
| chr19 | 59022341 | 59022506 |
| chr19 | 59024181 | 59024306 |
| chr19 | 59034891 | 59035046 |
| chr19 | 59080261 | 59080416 |
| chr19 | 59110791 | 59110946 |
| chr19 | 59321841 | 59321916 |
| chr19 | 59441801 | 59441946 |
| chr19 | 59643011 | 59643136 |
| chr19 | 59682981 | 59683176 |
| chr19 | 59683371 | 59683546 |
| chr19 | 59708251 | 59708426 |
| chr19 | 59746361 | 59746456 |
| chr19 | 60070111 | 60070216 |
| chr19 | 60168151 | 60168296 |
| chr19 | 60203691 | 60203836 |
| chr18 | 3281021  | 3281176  |
| chr18 | 3510211  | 3510346  |
| chr18 | 3666221  | 3666376  |
| chr18 | 4592271  | 4592356  |
| chr18 | 4968281  | 4968376  |
| chr18 | 4988671  | 4988886  |
| chr18 | 4989111  | 4989286  |
| chr18 | 5381451  | 5381576  |
| chr18 | 5414481  | 5414616  |
| chr18 | 5434611  | 5434736  |
| chr18 | 5435311  | 5435426  |
| chr18 | 5604051  | 5604226  |
| chr18 | 6989531  | 6989646  |
| chr18 | 7087761  | 7087886  |
| chr18 | 7895121  | 7895266  |
| chr18 | 8433411  | 8433586  |
| chr18 | 8911641  | 8911796  |
| chr18 | 8968671  | 8968936  |
| chr18 | 9811431  | 9811596  |
| chr18 | 10387601 | 10387786 |
| chr18 | 10418721 | 10418816 |
| chr18 | 10451981 | 10452106 |
| chr18 | 10461651 | 10461786 |
| chr18 | 10668201 | 10668336 |
| chr18 | 10668371 | 10668536 |
| chr18 | 10798211 | 10798316 |
| chr18 | 10839871 | 10839996 |
| chr18 | 10920751 | 10921096 |

|       |          |          |
|-------|----------|----------|
| chr18 | 11059121 | 11059326 |
| chr18 | 11112321 | 11112446 |
| chr18 | 11119041 | 11119166 |
| chr18 | 11495481 | 11495616 |
| chr18 | 11495891 | 11496526 |
| chr18 | 11496641 | 11496876 |
| chr18 | 11536471 | 11536656 |
| chr18 | 11614161 | 11614386 |
| chr18 | 11614481 | 11614696 |
| chr18 | 11614731 | 11614826 |
| chr18 | 11865801 | 11865946 |
| chr18 | 11867861 | 11868006 |
| chr18 | 11939821 | 11939986 |
| chr18 | 12000431 | 12000676 |
| chr18 | 12001391 | 12001576 |
| chr18 | 12001891 | 12002026 |
| chr18 | 12027441 | 12027556 |
| chr18 | 12030721 | 12030986 |
| chr18 | 12032071 | 12032206 |
| chr18 | 12238081 | 12238196 |
| chr18 | 12934041 | 12934236 |
| chr18 | 12936301 | 12936426 |
| chr18 | 12950331 | 12950456 |
| chr18 | 13081601 | 13081696 |
| chr18 | 13169651 | 13169846 |
| chr18 | 13208031 | 13208386 |
| chr18 | 13277721 | 13277836 |
| chr18 | 13283701 | 13283786 |
| chr18 | 13492601 | 13492816 |
| chr18 | 13506501 | 13506606 |
| chr18 | 13517161 | 13517286 |
| chr18 | 13589451 | 13589556 |
| chr18 | 13609181 | 13609296 |
| chr18 | 13814931 | 13815136 |
| chr18 | 13883121 | 13883326 |
| chr18 | 13883381 | 13883716 |
| chr18 | 13963161 | 13963326 |
| chr18 | 13996011 | 13996156 |
| chr18 | 14060861 | 14061026 |
| chr18 | 14066301 | 14066396 |
| chr18 | 14068741 | 14068866 |
| chr18 | 14073111 | 14073236 |
| chr18 | 14133801 | 14133926 |
| chr18 | 14422721 | 14422856 |
| chr18 | 14545851 | 14545986 |
| chr18 | 14601881 | 14602066 |
| chr18 | 14602491 | 14602646 |
| chr18 | 14820011 | 14820146 |
| chr18 | 14820441 | 14820576 |
| chr18 | 14824131 | 14824256 |
| chr18 | 14987261 | 14987416 |
| chr18 | 15132211 | 15132296 |
| chr18 | 15132311 | 15132596 |

|       |          |          |
|-------|----------|----------|
| chr18 | 15135751 | 15135846 |
| chr18 | 15181441 | 15181616 |
| chr18 | 15202801 | 15202906 |
| chr18 | 15252011 | 15252206 |
| chr18 | 15252341 | 15252456 |
| chr18 | 15291701 | 15291966 |
| chr18 | 15317661 | 15317956 |
| chr18 | 15318281 | 15318436 |
| chr18 | 15390931 | 15391106 |
| chr18 | 15410451 | 15410786 |
| chr18 | 15411001 | 15411166 |
| chr18 | 15488731 | 15488966 |
| chr18 | 15686971 | 15687226 |
| chr18 | 16436321 | 16436586 |
| chr18 | 16436981 | 16437096 |
| chr18 | 16690551 | 16690786 |
| chr18 | 16765401 | 16765626 |
| chr18 | 16769061 | 16769156 |
| chr18 | 16792231 | 16792416 |
| chr18 | 16803181 | 16803296 |
| chr18 | 16814591 | 16814776 |
| chr18 | 16816071 | 16816306 |
| chr18 | 16818411 | 16818616 |
| chr18 | 16887891 | 16888146 |
| chr18 | 20188471 | 20188566 |
| chr18 | 20575671 | 20575806 |
| chr18 | 20602431 | 20602566 |
| chr18 | 20783811 | 20783946 |
| chr18 | 20783981 | 20784096 |
| chr18 | 20784111 | 20784376 |
| chr18 | 20784541 | 20784686 |
| chr18 | 21086031 | 21086146 |
| chr18 | 21340991 | 21341116 |
| chr18 | 21518091 | 21518236 |
| chr18 | 21518261 | 21518516 |
| chr18 | 21871771 | 21871956 |
| chr18 | 21878931 | 21879116 |
| chr18 | 21879261 | 21879396 |
| chr18 | 22083591 | 22083676 |
| chr18 | 22481131 | 22481246 |
| chr18 | 22522731 | 22522896 |
| chr18 | 22524081 | 22524336 |
| chr18 | 22767681 | 22767806 |
| chr18 | 23250451 | 23250616 |
| chr18 | 23558141 | 23558306 |
| chr18 | 23591251 | 23591356 |
| chr18 | 23640641 | 23640756 |
| chr18 | 23761031 | 23761166 |
| chr18 | 23928811 | 23928966 |
| chr18 | 23950121 | 23950226 |
| chr18 | 23950581 | 23950956 |
| chr18 | 23951251 | 23951456 |
| chr18 | 23954741 | 23955016 |

|       |          |          |
|-------|----------|----------|
| chr18 | 24015121 | 24015256 |
| chr18 | 24552161 | 24552306 |
| chr18 | 24561711 | 24561836 |
| chr18 | 24863431 | 24863616 |
| chr18 | 25125241 | 25125336 |
| chr18 | 25207831 | 25207956 |
| chr18 | 25665091 | 25665236 |
| chr18 | 25682041 | 25682236 |
| chr18 | 25691631 | 25691826 |
| chr18 | 25691871 | 25692076 |
| chr18 | 25701371 | 25701636 |
| chr18 | 25702101 | 25702186 |
| chr18 | 25703851 | 25703946 |
| chr18 | 25710931 | 25711026 |
| chr18 | 25719921 | 25720036 |
| chr18 | 25743621 | 25743796 |
| chr18 | 25788571 | 25788676 |
| chr18 | 25788721 | 25788816 |
| chr18 | 25796241 | 25796386 |
| chr18 | 25797411 | 25797556 |
| chr18 | 25824031 | 25824406 |
| chr18 | 26204981 | 26205106 |
| chr18 | 27173721 | 27173936 |
| chr18 | 27453821 | 27453916 |
| chr18 | 27800641 | 27800746 |
| chr18 | 29023601 | 29023736 |
| chr18 | 29441311 | 29441466 |
| chr18 | 30340771 | 30340886 |
| chr18 | 30879651 | 30879836 |
| chr18 | 30955211 | 30955346 |
| chr18 | 32279371 | 32279526 |
| chr18 | 32308051 | 32308196 |
| chr18 | 32458501 | 32458656 |
| chr18 | 32493621 | 32493766 |
| chr18 | 32656721 | 32656856 |
| chr18 | 33279341 | 33279426 |
| chr18 | 33336531 | 33336656 |
| chr18 | 33440341 | 33440476 |
| chr18 | 33567961 | 33568116 |
| chr18 | 33597541 | 33597626 |
| chr18 | 33597721 | 33597826 |
| chr18 | 33912761 | 33912926 |
| chr18 | 33934381 | 33934486 |
| chr18 | 33934501 | 33934636 |
| chr18 | 34014121 | 34014296 |
| chr18 | 34015321 | 34015576 |
| chr18 | 34016031 | 34016226 |
| chr18 | 34016491 | 34016636 |
| chr18 | 34019121 | 34019346 |
| chr18 | 34078021 | 34078136 |
| chr18 | 34103321 | 34103416 |
| chr18 | 34177511 | 34177686 |
| chr18 | 34177811 | 34178016 |

|       |          |          |
|-------|----------|----------|
| chr18 | 34181281 | 34181416 |
| chr18 | 34284851 | 34285076 |
| chr18 | 34287721 | 34287816 |
| chr18 | 34292221 | 34292366 |
| chr18 | 34727121 | 34727286 |
| chr18 | 34809411 | 34809556 |
| chr18 | 34822491 | 34822556 |
| chr18 | 34909441 | 34909556 |
| chr18 | 35195151 | 35195266 |
| chr18 | 35195581 | 35195716 |
| chr18 | 35209451 | 35209556 |
| chr18 | 35336621 | 35336816 |
| chr18 | 35610781 | 35610876 |
| chr18 | 35628481 | 35628596 |
| chr18 | 35628771 | 35628906 |
| chr18 | 35628981 | 35629156 |
| chr18 | 35848161 | 35848286 |
| chr18 | 35942221 | 35942336 |
| chr18 | 35963121 | 35963246 |
| chr18 | 35981541 | 35981836 |
| chr18 | 36053051 | 36053326 |
| chr18 | 36059231 | 36059436 |
| chr18 | 36138601 | 36138776 |
| chr18 | 36253041 | 36253196 |
| chr18 | 36293151 | 36293306 |
| chr18 | 36510161 | 36510356 |
| chr18 | 36624211 | 36624416 |
| chr18 | 36624431 | 36624636 |
| chr18 | 36624951 | 36625146 |
| chr18 | 36633841 | 36633996 |
| chr18 | 36813401 | 36813516 |
| chr18 | 38182991 | 38183146 |
| chr18 | 38188921 | 38189066 |
| chr18 | 38190201 | 38190376 |
| chr18 | 38206811 | 38207016 |
| chr18 | 38215171 | 38215296 |
| chr18 | 38224051 | 38224376 |
| chr18 | 38259451 | 38259596 |
| chr18 | 38296551 | 38296806 |
| chr18 | 38329761 | 38329906 |
| chr18 | 38497751 | 38497886 |
| chr18 | 38517231 | 38517416 |
| chr18 | 38598271 | 38598426 |
| chr18 | 38650511 | 38650606 |
| chr18 | 38710071 | 38710376 |
| chr18 | 38714581 | 38714836 |
| chr18 | 38718991 | 38719086 |
| chr18 | 38774311 | 38774496 |
| chr18 | 38826751 | 38827036 |
| chr18 | 38850401 | 38850496 |
| chr18 | 39369731 | 39369916 |
| chr18 | 39410161 | 39410336 |
| chr18 | 39497761 | 39497866 |

|       |          |          |
|-------|----------|----------|
| chr18 | 39645201 | 39645376 |
| chr18 | 39853571 | 39853676 |
| chr18 | 40033721 | 40033856 |
| chr18 | 42010651 | 42010746 |
| chr18 | 42235341 | 42235466 |
| chr18 | 42248511 | 42248816 |
| chr18 | 42289421 | 42289606 |
| chr18 | 42596051 | 42596376 |
| chr18 | 42685301 | 42685486 |
| chr18 | 42747781 | 42748006 |
| chr18 | 42764921 | 42765076 |
| chr18 | 42794791 | 42794976 |
| chr18 | 42817551 | 42817646 |
| chr18 | 42853531 | 42853626 |
| chr18 | 42870751 | 42870866 |
| chr18 | 42887821 | 42887936 |
| chr18 | 42896371 | 42896556 |
| chr18 | 42897171 | 42897366 |
| chr18 | 42993751 | 42993866 |
| chr18 | 43059311 | 43059446 |
| chr18 | 43201851 | 43202076 |
| chr18 | 43202111 | 43202286 |
| chr18 | 43202331 | 43202436 |
| chr18 | 43283061 | 43283126 |
| chr18 | 43332181 | 43332316 |
| chr18 | 43402731 | 43402856 |
| chr18 | 43402901 | 43403336 |
| chr18 | 43403381 | 43403756 |
| chr18 | 43405191 | 43405376 |
| chr18 | 43406291 | 43406506 |
| chr18 | 43409101 | 43409246 |
| chr18 | 43634611 | 43634906 |
| chr18 | 44289171 | 44289316 |
| chr18 | 44683311 | 44683606 |
| chr18 | 44699931 | 44700216 |
| chr18 | 44710271 | 44710456 |
| chr18 | 44710561 | 44710686 |
| chr18 | 44711771 | 44711956 |
| chr18 | 44777691 | 44777876 |
| chr18 | 45140981 | 45141156 |
| chr18 | 45141311 | 45141426 |
| chr18 | 46476121 | 46476186 |
| chr18 | 46572601 | 46572736 |
| chr18 | 46684481 | 46684716 |
| chr18 | 47179961 | 47180086 |
| chr18 | 47295311 | 47295596 |
| chr18 | 47326921 | 47327036 |
| chr18 | 47369721 | 47369836 |
| chr18 | 47381161 | 47381506 |
| chr18 | 47428161 | 47428226 |
| chr18 | 47429871 | 47430046 |
| chr18 | 47430101 | 47430246 |
| chr18 | 47440201 | 47440336 |

|       |          |          |
|-------|----------|----------|
| chr18 | 47446481 | 47446626 |
| chr18 | 47446821 | 47446976 |
| chr18 | 47450651 | 47450826 |
| chr18 | 47455411 | 47455516 |
| chr18 | 47455651 | 47455816 |
| chr18 | 47466711 | 47466856 |
| chr18 | 47467081 | 47467336 |
| chr18 | 47474661 | 47474826 |
| chr18 | 47490381 | 47490526 |
| chr18 | 47496771 | 47497086 |
| chr18 | 47501811 | 47502136 |
| chr18 | 47531101 | 47531196 |
| chr18 | 47588201 | 47588356 |
| chr18 | 47602651 | 47602846 |
| chr18 | 47730051 | 47730136 |
| chr18 | 47771701 | 47771866 |
| chr18 | 47831091 | 47831236 |
| chr18 | 48024091 | 48024226 |
| chr18 | 48035061 | 48035246 |
| chr18 | 48389021 | 48389186 |
| chr18 | 49701781 | 49701906 |
| chr18 | 49735001 | 49735136 |
| chr18 | 49751211 | 49751406 |
| chr18 | 50154041 | 50154206 |
| chr18 | 50156591 | 50156686 |
| chr18 | 50171581 | 50171956 |
| chr18 | 50172331 | 50172516 |
| chr18 | 50177121 | 50177286 |
| chr18 | 52694701 | 52694786 |
| chr18 | 52695051 | 52695206 |
| chr18 | 52712811 | 52712946 |
| chr18 | 52742431 | 52742566 |
| chr18 | 52960711 | 52960826 |
| chr18 | 52962411 | 52962786 |
| chr18 | 52986671 | 52986836 |
| chr18 | 52988881 | 52989006 |
| chr18 | 53035111 | 53035186 |
| chr18 | 53071311 | 53071446 |
| chr18 | 53079831 | 53079976 |
| chr18 | 53079991 | 53080226 |
| chr18 | 53109211 | 53109336 |
| chr18 | 53184041 | 53184166 |
| chr18 | 53202131 | 53202286 |
| chr18 | 53203311 | 53203496 |
| chr18 | 53213801 | 53213936 |
| chr18 | 53375831 | 53376256 |
| chr18 | 53451991 | 53452156 |
| chr18 | 53452551 | 53452786 |
| chr18 | 53472281 | 53472436 |
| chr18 | 53510491 | 53510756 |
| chr18 | 53596221 | 53596366 |
| chr18 | 53602371 | 53602536 |
| chr18 | 53605431 | 53605796 |

|       |          |          |
|-------|----------|----------|
| chr18 | 53632321 | 53632466 |
| chr18 | 53649561 | 53649686 |
| chr18 | 53649851 | 53650236 |
| chr18 | 53661551 | 53661696 |
| chr18 | 53661781 | 53662126 |
| chr18 | 53754131 | 53754296 |
| chr18 | 54009501 | 54009666 |
| chr18 | 54090821 | 54091016 |
| chr18 | 54175951 | 54176096 |
| chr18 | 54200151 | 54200306 |
| chr18 | 54246921 | 54247066 |
| chr18 | 54247141 | 54247376 |
| chr18 | 54250921 | 54251056 |
| chr18 | 54300091 | 54300276 |
| chr18 | 54403401 | 54403586 |
| chr18 | 54403641 | 54403796 |
| chr18 | 54407631 | 54407856 |
| chr18 | 54497301 | 54497506 |
| chr18 | 54499751 | 54499936 |
| chr18 | 54627461 | 54627666 |
| chr18 | 54627871 | 54628116 |
| chr18 | 54708351 | 54708486 |
| chr18 | 54723971 | 54724106 |
| chr18 | 54736361 | 54736586 |
| chr18 | 54736981 | 54737136 |
| chr18 | 54737301 | 54737396 |
| chr18 | 54737411 | 54737546 |
| chr18 | 54817121 | 54817236 |
| chr18 | 54839971 | 54840266 |
| chr18 | 54884091 | 54884156 |
| chr18 | 54884801 | 54884896 |
| chr18 | 54946121 | 54946356 |
| chr18 | 54946391 | 54946666 |
| chr18 | 54947431 | 54947526 |
| chr18 | 54948411 | 54948736 |
| chr18 | 54954761 | 54954866 |
| chr18 | 54962211 | 54962306 |
| chr18 | 54971941 | 54972166 |
| chr18 | 54972261 | 54972416 |
| chr18 | 55001761 | 55002086 |
| chr18 | 55032171 | 55032606 |
| chr18 | 55074131 | 55074286 |
| chr18 | 55076421 | 55076526 |
| chr18 | 55077331 | 55077586 |
| chr18 | 55077591 | 55078086 |
| chr18 | 55082131 | 55082246 |
| chr18 | 55087071 | 55087296 |
| chr18 | 55096321 | 55096456 |
| chr18 | 55103991 | 55104196 |
| chr18 | 55104251 | 55104666 |
| chr18 | 55214731 | 55214946 |
| chr18 | 55217611 | 55218046 |
| chr18 | 55227331 | 55227436 |



|       |          |          |
|-------|----------|----------|
| chr18 | 55252361 | 55252456 |
| chr18 | 55256771 | 55256936 |
| chr18 | 55261701 | 55261796 |
| chr18 | 55268361 | 55268446 |
| chr18 | 55382621 | 55382776 |
| chr18 | 55384031 | 55384196 |
| chr18 | 55386641 | 55386786 |
| chr18 | 55504991 | 55505186 |
| chr18 | 55550551 | 55550646 |
| chr18 | 55611071 | 55611286 |
| chr18 | 55623071 | 55623256 |
| chr18 | 55672671 | 55672796 |
| chr18 | 55749931 | 55750046 |
| chr18 | 55764121 | 55764276 |
| chr18 | 55781251 | 55781416 |
| chr18 | 55820781 | 55820946 |
| chr18 | 55859011 | 55859196 |
| chr18 | 55880671 | 55880836 |
| chr18 | 55887441 | 55887556 |
| chr18 | 55937241 | 55937376 |
| chr18 | 55941291 | 55941546 |
| chr18 | 56016151 | 56016216 |
| chr18 | 56483041 | 56483196 |
| chr18 | 56813791 | 56813976 |
| chr18 | 56881521 | 56881726 |
| chr18 | 56931091 | 56931276 |
| chr18 | 56937251 | 56937426 |
| chr18 | 57090261 | 57090426 |
| chr18 | 57388521 | 57388696 |
| chr18 | 57396331 | 57396526 |
| chr18 | 57441751 | 57441856 |
| chr18 | 57607591 | 57607726 |
| chr18 | 57643161 | 57643256 |
| chr18 | 57648341 | 57648506 |
| chr18 | 57677171 | 57677346 |
| chr18 | 57728411 | 57728556 |
| chr18 | 57949551 | 57949786 |
| chr18 | 57980011 | 57980126 |
| chr18 | 58103111 | 58103266 |
| chr18 | 58117021 | 58117286 |
| chr18 | 58168691 | 58168886 |
| chr18 | 58216041 | 58216116 |
| chr18 | 58231671 | 58231766 |
| chr18 | 58233291 | 58233366 |
| chr18 | 58250901 | 58250966 |
| chr18 | 58269331 | 58269466 |
| chr18 | 58283811 | 58283996 |
| chr18 | 58318211 | 58318356 |
| chr18 | 58500751 | 58500856 |
| chr18 | 58511651 | 58511786 |
| chr18 | 58578971 | 58579086 |
| chr18 | 58591631 | 58591856 |
| chr18 | 58647671 | 58647826 |

|       |          |          |
|-------|----------|----------|
| chr18 | 59187571 | 59187796 |
| chr18 | 59202401 | 59202526 |
| chr18 | 59202571 | 59202746 |
| chr18 | 60280761 | 60280866 |
| chr18 | 60645581 | 60645736 |
| chr18 | 60729731 | 60730126 |
| chr18 | 60730131 | 60730446 |
| chr18 | 60731501 | 60731646 |
| chr18 | 60731961 | 60732146 |
| chr18 | 60735401 | 60735576 |
| chr18 | 60738741 | 60738896 |
| chr18 | 60777571 | 60777696 |
| chr18 | 60779431 | 60779626 |
| chr18 | 60786661 | 60787226 |
| chr18 | 60789501 | 60789626 |
| chr18 | 60789681 | 60789816 |
| chr18 | 60844021 | 60844256 |
| chr18 | 60874301 | 60874366 |
| chr18 | 61171971 | 61172276 |
| chr18 | 61181501 | 61181666 |
| chr18 | 61181741 | 61182026 |
| chr18 | 61320421 | 61320536 |
| chr18 | 61338281 | 61338396 |
| chr18 | 61453571 | 61453686 |
| chr18 | 61777741 | 61777906 |
| chr18 | 61778711 | 61778876 |
| chr18 | 61779071 | 61779226 |
| chr18 | 61801111 | 61801306 |
| chr18 | 61821741 | 61821916 |
| chr18 | 61856351 | 61856536 |
| chr18 | 62773191 | 62773406 |
| chr18 | 62988541 | 62988746 |
| chr18 | 62989121 | 62989226 |
| chr18 | 62989951 | 62990076 |
| chr18 | 62990151 | 62990306 |
| chr18 | 62995011 | 62995136 |
| chr18 | 63325241 | 63325366 |
| chr18 | 63326511 | 63326816 |
| chr18 | 63464431 | 63464696 |
| chr18 | 63481851 | 63482056 |
| chr18 | 63621631 | 63621746 |
| chr18 | 63972421 | 63972566 |
| chr18 | 63972591 | 63972886 |
| chr18 | 64050161 | 64050366 |
| chr18 | 64132071 | 64132246 |
| chr18 | 64132451 | 64132536 |
| chr18 | 64208121 | 64208236 |
| chr18 | 64481601 | 64481766 |
| chr18 | 64562961 | 64563226 |
| chr18 | 64563261 | 64563386 |
| chr18 | 64586011 | 64586086 |
| chr18 | 64606461 | 64606596 |
| chr18 | 64618541 | 64618686 |

|       |          |          |
|-------|----------|----------|
| chr18 | 64643771 | 64643996 |
| chr18 | 65101841 | 65102086 |
| chr18 | 65269241 | 65269406 |
| chr18 | 65391061 | 65391306 |
| chr18 | 65632381 | 65632546 |
| chr18 | 65632571 | 65632776 |
| chr18 | 65644591 | 65644776 |
| chr18 | 65645171 | 65645366 |
| chr18 | 65646821 | 65646956 |
| chr18 | 65652731 | 65653026 |
| chr18 | 65672871 | 65673056 |
| chr18 | 65678091 | 65678226 |
| chr18 | 65678301 | 65678616 |
| chr18 | 65686371 | 65686556 |
| chr18 | 65823761 | 65824036 |
| chr18 | 65829591 | 65829746 |
| chr18 | 65907041 | 65907166 |
| chr18 | 65972371 | 65972506 |
| chr18 | 65975421 | 65975526 |
| chr18 | 65975971 | 65976136 |
| chr18 | 65992601 | 65992706 |
| chr18 | 66148901 | 66149036 |
| chr18 | 66149151 | 66149356 |
| chr18 | 66163231 | 66163396 |
| chr18 | 66200951 | 66201126 |
| chr18 | 66249281 | 66249416 |
| chr18 | 66314331 | 66314456 |
| chr18 | 66394861 | 66394966 |
| chr18 | 66412881 | 66413016 |
| chr18 | 66440971 | 66441116 |
| chr18 | 66470651 | 66470906 |
| chr18 | 66601141 | 66601366 |
| chr18 | 66620911 | 66621006 |
| chr18 | 66629351 | 66629656 |
| chr18 | 66896101 | 66896286 |
| chr18 | 66948011 | 66948176 |
| chr18 | 66948271 | 66948426 |
| chr18 | 66987711 | 66987886 |
| chr18 | 67104581 | 67104726 |
| chr18 | 67521901 | 67522056 |
| chr18 | 67522121 | 67522356 |
| chr18 | 67567931 | 67568166 |
| chr18 | 68133171 | 68133286 |
| chr18 | 68184421 | 68184566 |
| chr18 | 68243341 | 68243526 |
| chr18 | 68340471 | 68340646 |
| chr18 | 68343701 | 68343826 |
| chr18 | 68396031 | 68396156 |
| chr18 | 68582281 | 68582426 |
| chr18 | 68753181 | 68753306 |
| chr18 | 68920101 | 68920256 |
| chr18 | 69068781 | 69068926 |
| chr18 | 69068941 | 69069046 |

|       |          |          |
|-------|----------|----------|
| chr18 | 69265941 | 69266096 |
| chr18 | 69316841 | 69317016 |
| chr18 | 69317111 | 69317286 |
| chr18 | 69342411 | 69342666 |
| chr18 | 69507061 | 69507206 |
| chr18 | 69508141 | 69508456 |
| chr18 | 69509161 | 69509356 |
| chr18 | 69530021 | 69530166 |
| chr18 | 69564441 | 69564586 |
| chr18 | 69564741 | 69564846 |
| chr18 | 69573341 | 69573626 |
| chr18 | 69588071 | 69588256 |
| chr18 | 69594771 | 69594936 |
| chr18 | 69624541 | 69624756 |
| chr18 | 69627771 | 69627906 |
| chr18 | 69631911 | 69632106 |
| chr18 | 69642791 | 69642956 |
| chr18 | 69644811 | 69644966 |
| chr18 | 69645141 | 69645306 |
| chr18 | 69686781 | 69686906 |
| chr18 | 69710641 | 69710796 |
| chr18 | 69919691 | 69919906 |
| chr18 | 69920021 | 69920176 |
| chr18 | 69920461 | 69920696 |
| chr18 | 70194791 | 70194886 |
| chr18 | 70366411 | 70366566 |
| chr18 | 70707801 | 70707986 |
| chr18 | 72766441 | 72766646 |
| chr18 | 72841341 | 72841466 |
| chr18 | 73426701 | 73426906 |
| chr18 | 73680061 | 73680196 |
| chr18 | 73749961 | 73750056 |
| chr18 | 73842581 | 73842746 |
| chr18 | 73855571 | 73855826 |
| chr18 | 73942341 | 73942546 |
| chr18 | 73991281 | 73991436 |
| chr18 | 74024061 | 74024176 |
| chr18 | 74032421 | 74032626 |
| chr18 | 74140031 | 74140186 |
| chr18 | 75002711 | 75002896 |
| chr18 | 75082311 | 75082416 |
| chr18 | 75092191 | 75092326 |
| chr18 | 75092701 | 75092836 |
| chr18 | 75106661 | 75107046 |
| chr18 | 75301631 | 75301736 |
| chr18 | 75348971 | 75349146 |
| chr18 | 75376131 | 75376336 |
| chr18 | 75386971 | 75387216 |
| chr18 | 75390561 | 75390696 |
| chr18 | 75394951 | 75395046 |
| chr18 | 75397951 | 75398186 |
| chr18 | 75399751 | 75400076 |
| chr18 | 75414481 | 75414656 |

|       |          |          |
|-------|----------|----------|
| chr18 | 75447631 | 75447746 |
| chr18 | 75450601 | 75450726 |
| chr18 | 75498651 | 75498856 |
| chr18 | 75500301 | 75500546 |
| chr18 | 75503081 | 75503176 |
| chr18 | 75503801 | 75503936 |
| chr18 | 75505931 | 75506116 |
| chr18 | 75506991 | 75507116 |
| chr18 | 75510131 | 75510246 |
| chr18 | 75510361 | 75510516 |
| chr18 | 75511341 | 75511686 |
| chr18 | 75511771 | 75511936 |
| chr18 | 75512041 | 75512136 |
| chr18 | 75516491 | 75516746 |
| chr18 | 75517171 | 75517296 |
| chr18 | 75517751 | 75518096 |
| chr18 | 75523551 | 75523966 |
| chr18 | 75524061 | 75524226 |
| chr18 | 75590291 | 75590576 |
| chr18 | 75591091 | 75591186 |
| chr18 | 75618191 | 75618346 |
| chr18 | 75626681 | 75626856 |
| chr18 | 75628141 | 75628566 |
| chr18 | 75705001 | 75705076 |
| chr18 | 75986731 | 75986866 |
| chr18 | 76133491 | 76133616 |
| chr18 | 76212971 | 76213066 |
| chr18 | 76213601 | 76213936 |
| chr18 | 76214971 | 76215166 |
| chr18 | 76215671 | 76215946 |
| chr18 | 76273051 | 76273396 |
| chr18 | 76325851 | 76326136 |
| chr18 | 76330151 | 76330306 |
| chr18 | 76462111 | 76462256 |
| chr18 | 76518661 | 76518816 |
| chr18 | 76524611 | 76524986 |
| chr18 | 76564381 | 76564716 |
| chr18 | 76583291 | 76583436 |
| chr18 | 76595191 | 76595306 |
| chr18 | 76737901 | 76738376 |
| chr18 | 76738461 | 76738576 |
| chr18 | 76746771 | 76746926 |
| chr18 | 76747001 | 76747166 |
| chr18 | 76748451 | 76748556 |
| chr18 | 76748711 | 76748826 |
| chr18 | 76757271 | 76757466 |
| chr18 | 76758221 | 76758396 |
| chr18 | 76761211 | 76761346 |
| chr18 | 76796201 | 76796296 |
| chr18 | 76798681 | 76798906 |
| chr18 | 76820571 | 76821026 |
| chr18 | 77153421 | 77153556 |
| chr18 | 77250801 | 77250996 |

|       |          |          |
|-------|----------|----------|
| chr18 | 77734151 | 77734266 |
| chr18 | 77755181 | 77755356 |
| chr18 | 77755371 | 77755506 |
| chr18 | 78137771 | 78137896 |
| chr18 | 78256321 | 78256476 |
| chr18 | 78376801 | 78376926 |
| chr18 | 78405201 | 78405366 |
| chr18 | 78418701 | 78418816 |
| chr18 | 78451311 | 78451436 |
| chr18 | 78503081 | 78503166 |
| chr18 | 78511051 | 78511276 |
| chr18 | 78568791 | 78568926 |
| chr18 | 78627991 | 78628106 |
| chr18 | 78646921 | 78647116 |
| chr18 | 78763431 | 78763556 |
| chr18 | 78819421 | 78819556 |
| chr18 | 78967361 | 78967596 |
| chr18 | 79182541 | 79182706 |
| chr18 | 79211181 | 79211506 |
| chr18 | 79233621 | 79233946 |
| chr18 | 79548231 | 79548376 |
| chr18 | 79550061 | 79550236 |
| chr18 | 79629311 | 79629526 |
| chr18 | 80202561 | 80202796 |
| chr18 | 80322421 | 80322536 |
| chr18 | 80352501 | 80352606 |
| chr18 | 80389281 | 80389366 |
| chr18 | 80696271 | 80696436 |
| chr18 | 80697911 | 80698066 |
| chr18 | 80817581 | 80817676 |
| chr18 | 80973991 | 80974106 |
| chr18 | 81123831 | 81123946 |
| chr18 | 81138511 | 81138656 |
| chr18 | 81216131 | 81216406 |
| chr18 | 81216681 | 81216856 |
| chr18 | 81253151 | 81253286 |
| chr18 | 81253421 | 81253566 |
| chr18 | 81261501 | 81261686 |
| chr18 | 81343181 | 81343296 |
| chr18 | 81367201 | 81367356 |
| chr18 | 81413901 | 81414096 |
| chr18 | 81414101 | 81414246 |
| chr18 | 81414341 | 81414526 |
| chr18 | 81483961 | 81484166 |
| chr18 | 81560051 | 81560136 |
| chr18 | 81633861 | 81634026 |
| chr18 | 81710061 | 81710176 |
| chr18 | 81806941 | 81807246 |
| chr18 | 81808641 | 81808966 |
| chr18 | 81809481 | 81809726 |
| chr18 | 81810221 | 81810556 |
| chr18 | 81865321 | 81865456 |
| chr18 | 81866331 | 81866436 |

|       |          |          |
|-------|----------|----------|
| chr18 | 81866701 | 81866776 |
| chr18 | 81867051 | 81867166 |
| chr18 | 81887061 | 81887196 |
| chr18 | 81953341 | 81953476 |
| chr18 | 82049051 | 82049126 |
| chr18 | 82060371 | 82060496 |
| chr18 | 82060611 | 82060716 |
| chr18 | 82063831 | 82063986 |
| chr18 | 82064131 | 82064266 |
| chr18 | 82173931 | 82174026 |
| chr18 | 82619051 | 82619116 |
| chr18 | 82635461 | 82635556 |
| chr18 | 82681911 | 82682086 |
| chr18 | 82690171 | 82690566 |
| chr18 | 82698881 | 82699026 |
| chr18 | 82699141 | 82699296 |
| chr18 | 82771331 | 82771526 |
| chr18 | 82860241 | 82860386 |
| chr18 | 82941241 | 82941446 |
| chr18 | 83053941 | 83054156 |
| chr18 | 83066711 | 83066826 |
| chr18 | 83106881 | 83107106 |
| chr18 | 83201951 | 83202056 |
| chr18 | 83246661 | 83246756 |
| chr18 | 83250061 | 83250336 |
| chr18 | 83250731 | 83250916 |
| chr18 | 83253861 | 83254036 |
| chr18 | 83257501 | 83257686 |
| chr18 | 83257781 | 83257976 |
| chr18 | 83319561 | 83319706 |
| chr18 | 83320431 | 83320646 |
| chr18 | 83466951 | 83467236 |
| chr18 | 83485341 | 83485466 |
| chr18 | 83497721 | 83497806 |
| chr18 | 83497861 | 83497986 |
| chr18 | 83501281 | 83501436 |
| chr18 | 83508481 | 83508586 |
| chr18 | 83658461 | 83658586 |
| chr18 | 83769771 | 83769916 |
| chr18 | 83771391 | 83771486 |
| chr18 | 83771801 | 83772036 |
| chr18 | 83772171 | 83772336 |
| chr18 | 83939591 | 83939876 |
| chr18 | 83951911 | 83952086 |
| chr18 | 83965121 | 83965246 |
| chr18 | 83965341 | 83965416 |
| chr18 | 83974091 | 83974486 |
| chr18 | 83974561 | 83974706 |
| chr18 | 84062591 | 84063136 |
| chr18 | 84075601 | 84075726 |
| chr18 | 84089611 | 84089756 |
| chr18 | 84089931 | 84090136 |
| chr18 | 84090461 | 84090586 |

|       |          |          |
|-------|----------|----------|
| chr18 | 84165371 | 84165526 |
| chr18 | 84170471 | 84170656 |
| chr18 | 84201451 | 84201606 |
| chr18 | 84205001 | 84205236 |
| chr18 | 84207901 | 84208016 |
| chr18 | 84211701 | 84211936 |
| chr18 | 84212931 | 84213146 |
| chr18 | 84213321 | 84213476 |
| chr18 | 84214521 | 84214826 |
| chr18 | 84225251 | 84225426 |
| chr18 | 84263981 | 84264096 |
| chr18 | 84463611 | 84463896 |
| chr18 | 84514861 | 84514946 |
| chr18 | 84530621 | 84530756 |
| chr18 | 84548961 | 84549216 |
| chr18 | 84591201 | 84591446 |
| chr18 | 84592331 | 84592446 |
| chr18 | 84666391 | 84666546 |
| chr18 | 84799161 | 84799296 |
| chr18 | 84809081 | 84809286 |
| chr18 | 87031291 | 87031476 |
| chr18 | 87533731 | 87533886 |
| chr18 | 88820001 | 88820116 |
| chrX  | 5533361  | 5533516  |
| chrX  | 5591161  | 5591306  |
| chrX  | 6601261  | 6601366  |
| chrX  | 6710891  | 6710996  |
| chrX  | 6897151  | 6897316  |
| chrX  | 7382011  | 7382186  |
| chrX  | 7395871  | 7396026  |
| chrX  | 7396091  | 7396246  |
| chrX  | 9263071  | 9263186  |
| chrX  | 9744731  | 9744836  |
| chrX  | 9872001  | 9872126  |
| chrX  | 10407301 | 10407466 |
| chrX  | 10636841 | 10637006 |
| chrX  | 10650901 | 10651236 |
| chrX  | 10717561 | 10717656 |
| chrX  | 10820091 | 10820226 |
| chrX  | 10828851 | 10828956 |
| chrX  | 11084001 | 11084136 |
| chrX  | 11088611 | 11088756 |
| chrX  | 11101801 | 11101926 |
| chrX  | 11219171 | 11219356 |
| chrX  | 11595151 | 11595476 |
| chrX  | 11623361 | 11623576 |
| chrX  | 12083391 | 12083516 |
| chrX  | 13785431 | 13785586 |
| chrX  | 13789891 | 13790036 |
| chrX  | 13794011 | 13794136 |
| chrX  | 16704641 | 16704776 |
| chrX  | 19577321 | 19577406 |
| chrX  | 22423491 | 22423586 |



|      |          |          |
|------|----------|----------|
| chrX | 32980421 | 32980546 |
| chrX | 34492241 | 34492376 |
| chrX | 37650991 | 37651186 |
| chrX | 37670401 | 37670536 |
| chrX | 37808921 | 37809066 |
| chrX | 37823551 | 37823676 |
| chrX | 38182621 | 38182886 |
| chrX | 38384431 | 38384586 |
| chrX | 38555721 | 38555866 |
| chrX | 38822881 | 38823126 |
| chrX | 39446091 | 39446186 |
| chrX | 41327221 | 41327356 |
| chrX | 43122901 | 43123036 |
| chrX | 45514421 | 45514596 |
| chrX | 45611791 | 45611906 |
| chrX | 45632041 | 45632216 |
| chrX | 45632411 | 45632546 |
| chrX | 45708161 | 45708266 |
| chrX | 45996001 | 45996096 |
| chrX | 47043141 | 47043366 |
| chrX | 47108041 | 47108206 |
| chrX | 47654761 | 47654886 |
| chrX | 47760091 | 47760236 |
| chrX | 48019921 | 48020066 |
| chrX | 48152411 | 48152646 |
| chrX | 48271271 | 48271346 |
| chrX | 48395871 | 48396006 |
| chrX | 48457041 | 48457186 |
| chrX | 48861041 | 48861166 |
| chrX | 48876401 | 48876506 |
| chrX | 48893601 | 48893836 |
| chrX | 49165581 | 49165816 |
| chrX | 49294061 | 49294196 |
| chrX | 52729181 | 52729316 |
| chrX | 53020271 | 53020376 |
| chrX | 54010291 | 54010396 |
| chrX | 54316251 | 54316376 |
| chrX | 54400981 | 54401276 |
| chrX | 54503361 | 54503456 |
| chrX | 54818361 | 54818486 |
| chrX | 56980471 | 56980696 |
| chrX | 57056811 | 57056976 |
| chrX | 57059051 | 57059186 |
| chrX | 57094311 | 57094446 |
| chrX | 58077121 | 58077256 |
| chrX | 62916981 | 62917156 |
| chrX | 62946281 | 62946446 |
| chrX | 67206701 | 67206936 |
| chrX | 68197881 | 68197976 |
| chrX | 70259281 | 70259446 |
| chrX | 72330721 | 72330806 |
| chrX | 79067411 | 79067506 |
| chrX | 80329491 | 80329596 |

|      |           |           |
|------|-----------|-----------|
| chrX | 81113981  | 81114106  |
| chrX | 81972201  | 81972336  |
| chrX | 89286521  | 89286636  |
| chrX | 89532751  | 89532916  |
| chrX | 89563091  | 89563226  |
| chrX | 89843641  | 89843756  |
| chrX | 90008121  | 90008266  |
| chrX | 90219771  | 90219936  |
| chrX | 90265331  | 90265486  |
| chrX | 90274071  | 90274356  |
| chrX | 95260561  | 95260676  |
| chrX | 95399701  | 95399846  |
| chrX | 95417981  | 95418126  |
| chrX | 95539991  | 95540146  |
| chrX | 95636541  | 95636656  |
| chrX | 95659251  | 95659356  |
| chrX | 95795961  | 95796156  |
| chrX | 96652271  | 96652496  |
| chrX | 96988271  | 96988416  |
| chrX | 97467651  | 97467746  |
| chrX | 97502851  | 97502996  |
| chrX | 97579881  | 97580026  |
| chrX | 97855841  | 97855956  |
| chrX | 97857351  | 97857456  |
| chrX | 98122901  | 98123016  |
| chrX | 98189851  | 98189966  |
| chrX | 98283821  | 98283976  |
| chrX | 98514921  | 98515056  |
| chrX | 98542461  | 98542646  |
| chrX | 99516931  | 99517116  |
| chrX | 101749171 | 101749246 |
| chrX | 102111161 | 102111266 |
| chrX | 102296341 | 102296446 |
| chrX | 103975291 | 103975436 |
| chrX | 105323871 | 105324026 |
| chrX | 107017411 | 107017556 |
| chrX | 129027551 | 129027686 |
| chrX | 129966121 | 129966246 |
| chrX | 129966351 | 129966456 |
| chrX | 131550201 | 131550356 |
| chrX | 131598501 | 131598626 |
| chrX | 131618951 | 131619056 |
| chrX | 131836251 | 131836366 |
| chrX | 134560141 | 134560276 |
| chrX | 135127131 | 135127316 |
| chrX | 137120571 | 137120726 |
| chrX | 137443441 | 137443586 |
| chrX | 137943291 | 137943426 |
| chrX | 137973441 | 137973566 |
| chrX | 138187491 | 138187596 |
| chrX | 138296631 | 138296716 |
| chrX | 138591251 | 138591406 |
| chrX | 142440311 | 142440426 |

|      |           |           |
|------|-----------|-----------|
| chrX | 147130981 | 147131186 |
| chrX | 147495711 | 147495866 |
| chrX | 152792081 | 152792306 |
| chrX | 152931071 | 152931216 |
| chrX | 154267511 | 154267726 |
| chrX | 155048531 | 155048726 |
| chrX | 155055371 | 155055466 |
| chrX | 156209251 | 156209386 |
| chrX | 157702671 | 157702796 |
| chrX | 158072501 | 158072696 |
| chrX | 158080261 | 158080376 |
| chrX | 158797421 | 158797516 |
| chrX | 161965381 | 161965516 |
| chrX | 162527721 | 162527836 |
| chrX | 164557741 | 164558076 |
| chrX | 164651441 | 164651796 |
| chrX | 164715521 | 164715826 |
| chrX | 164815021 | 164815176 |
| chrX | 164939081 | 164939216 |
| chrX | 165030011 | 165030186 |
| chrX | 165036371 | 165036666 |
| chrX | 165051921 | 165052146 |
| chrX | 165113911 | 165114066 |
| chrX | 165118151 | 165118326 |
| chrX | 165133911 | 165134106 |
| chrX | 165144431 | 165144606 |
| chrX | 165158431 | 165158526 |
| chrX | 165171021 | 165171366 |
| chrX | 165172391 | 165172556 |
| chrX | 165174031 | 165174176 |
| chrX | 165189731 | 165189806 |
| chrX | 165243091 | 165243276 |
| chrX | 165269991 | 165270216 |
| chrX | 165271151 | 165271396 |
| chrX | 165271491 | 165271836 |
| chrX | 165272941 | 165273106 |
| chrX | 165273231 | 165273386 |
| chrX | 165277491 | 165277616 |
| chrX | 165277991 | 165278256 |
