# Supplementary material for: Dynamic hydroxymethylation of deoxyribonucleic acid marks differentiation-associated enhancers
Source: PubMed Central journal article supplement — Nucleic Acids Res. 2012 Jun 21;40(17):8255–65. doi: 10.1093/nar/gks595 (PMC3458548; doi:10.1093/nar/gks595), 2012-06-21
Supplement: supp_gks595_nar-01065-v-2012-File008.pdf [file supp_gks595_nar-01065-v-2012-File008.pdf]

Supplementary Table 5: 5hmC-up regions in 3T3-L1 cells treated with DC for 8 days (mm9)

| chr  | start    | stop     |
|------|----------|----------|
| chr7 | 4444061  | 4444306  |
| chr7 | 4609011  | 4609146  |
| chr7 | 4838411  | 4838586  |
| chr7 | 4989161  | 4989356  |
| chr7 | 5042681  | 5042966  |
| chr7 | 16545121 | 16545376 |
| chr7 | 16549271 | 16549446 |
| chr7 | 16589351 | 16589506 |
| chr7 | 17206411 | 17206526 |
| chr7 | 17345851 | 17346136 |
| chr7 | 17346471 | 17346666 |
| chr7 | 17349831 | 17350086 |
| chr7 | 17369681 | 17370166 |
| chr7 | 17439081 | 17439316 |
| chr7 | 17507561 | 17507716 |
| chr7 | 17575541 | 17575656 |
| chr7 | 17575871 | 17575986 |
| chr7 | 17610791 | 17611016 |
| chr7 | 17643481 | 17643776 |
| chr7 | 17644101 | 17644306 |
| chr7 | 19749021 | 19749206 |
| chr7 | 19852601 | 19852956 |
| chr7 | 19852971 | 19853266 |
| chr7 | 20271921 | 20272046 |
| chr7 | 20273531 | 20273726 |
| chr7 | 20280521 | 20280866 |
| chr7 | 20286341 | 20286466 |
| chr7 | 20332761 | 20333186 |
| chr7 | 20341271 | 20341506 |
| chr7 | 20504481 | 20504646 |
| chr7 | 25085731 | 25085856 |
| chr7 | 25214691 | 25214826 |
| chr7 | 25337151 | 25337346 |
| chr7 | 25697591 | 25697986 |
| chr7 | 25791691 | 25791966 |
| chr7 | 25811561 | 25811826 |
| chr7 | 25834831 | 25834996 |
| chr7 | 25863521 | 25863696 |
| chr7 | 25868841 | 25869116 |
| chr7 | 25990781 | 25991266 |
| chr7 | 26150731 | 26150936 |
| chr7 | 26163111 | 26163546 |
| chr7 | 26165271 | 26165416 |
| chr7 | 26165921 | 26166156 |
| chr7 | 26168891 | 26169056 |
| chr7 | 26169231 | 26169386 |
| chr7 | 26169481 | 26169866 |
| chr7 | 26171951 | 26172106 |
| chr7 | 26173221 | 26173906 |

|      |          |          |
|------|----------|----------|
| chr7 | 26173921 | 26174146 |
| chr7 | 26177731 | 26177876 |
| chr7 | 26177911 | 26178276 |
| chr7 | 26432421 | 26432536 |
| chr7 | 26439941 | 26440146 |
| chr7 | 26474591 | 26474676 |
| chr7 | 26492231 | 26492386 |
| chr7 | 26587781 | 26588266 |
| chr7 | 27950571 | 27950746 |
| chr7 | 28110681 | 28110846 |
| chr7 | 28344351 | 28344506 |
| chr7 | 28382031 | 28382436 |
| chr7 | 28391471 | 28391726 |
| chr7 | 28391911 | 28392266 |
| chr7 | 28397941 | 28398166 |
| chr7 | 28828611 | 28828896 |
| chr7 | 28966011 | 28966256 |
| chr7 | 28976811 | 28976926 |
| chr7 | 28988171 | 28988286 |
| chr7 | 29065831 | 29065976 |
| chr7 | 29170401 | 29170546 |
| chr7 | 29355661 | 29355916 |
| chr7 | 29600711 | 29600906 |
| chr7 | 29601321 | 29601476 |
| chr7 | 29623591 | 29623766 |
| chr7 | 29656071 | 29656296 |
| chr7 | 29702191 | 29702316 |
| chr7 | 29721041 | 29721286 |
| chr7 | 30091411 | 30091526 |
| chr7 | 30102421 | 30102586 |
| chr7 | 30211211 | 30211336 |
| chr7 | 30506771 | 30506936 |
| chr7 | 30555061 | 30555316 |
| chr7 | 30897331 | 30897716 |
| chr7 | 30906181 | 30906296 |
| chr7 | 30988291 | 30988706 |
| chr7 | 31019211 | 31019346 |
| chr7 | 31080221 | 31080496 |
| chr7 | 31317731 | 31317886 |
| chr7 | 31374861 | 31375026 |
| chr7 | 31534801 | 31535186 |
| chr7 | 31586361 | 31586496 |
| chr7 | 31732451 | 31732616 |
| chr7 | 31868411 | 31868656 |
| chr7 | 31937431 | 31937576 |
| chr7 | 31947271 | 31947486 |
| chr7 | 35000821 | 35000946 |
| chr7 | 35013951 | 35014086 |
| chr7 | 35543871 | 35544056 |
| chr7 | 35624891 | 35625036 |
| chr7 | 35806701 | 35806906 |
| chr7 | 35814641 | 35814816 |
| chr7 | 35904401 | 35904896 |

|      |          |          |
|------|----------|----------|
| chr7 | 35910431 | 35910536 |
| chr7 | 35914321 | 35914556 |
| chr7 | 35915611 | 35915856 |
| chr7 | 35931191 | 35931576 |
| chr7 | 35956191 | 35956356 |
| chr7 | 35959901 | 35960056 |
| chr7 | 35988581 | 35988816 |
| chr7 | 36375921 | 36376166 |
| chr7 | 36502451 | 36502586 |
| chr7 | 38716731 | 38716876 |
| chr7 | 38717011 | 38717276 |
| chr7 | 38970311 | 38970446 |
| chr7 | 38984721 | 38984946 |
| chr7 | 46808751 | 46808886 |
| chr7 | 50701371 | 50701606 |
| chr7 | 50709011 | 50709236 |
| chr7 | 50709371 | 50709626 |
| chr7 | 51780361 | 51780596 |
| chr7 | 51901541 | 51901716 |
| chr7 | 52116341 | 52116546 |
| chr7 | 52122101 | 52122326 |
| chr7 | 52164991 | 52165146 |
| chr7 | 52212991 | 52213136 |
| chr7 | 52232391 | 52232646 |
| chr7 | 52255141 | 52255436 |
| chr7 | 52366861 | 52366976 |
| chr7 | 52490931 | 52491456 |
| chr7 | 52621481 | 52621706 |
| chr7 | 52693241 | 52693446 |
| chr7 | 52694811 | 52695126 |
| chr7 | 52712401 | 52712776 |
| chr7 | 52776491 | 52776686 |
| chr7 | 52827901 | 52828076 |
| chr7 | 52830351 | 52830436 |
| chr7 | 52896741 | 52897186 |
| chr7 | 52933971 | 52934286 |
| chr7 | 52941831 | 52942276 |
| chr7 | 52966731 | 52967026 |
| chr7 | 52967741 | 52967996 |
| chr7 | 52968941 | 52969056 |
| chr7 | 52987391 | 52987756 |
| chr7 | 53121201 | 53121296 |
| chr7 | 53770601 | 53770756 |
| chr7 | 54085381 | 54085636 |
| chr7 | 54086021 | 54086176 |
| chr7 | 54104031 | 54104286 |
| chr7 | 56331911 | 56332056 |
| chr7 | 56414911 | 56415216 |
| chr7 | 57019401 | 57019616 |
| chr7 | 57019871 | 57020086 |
| chr7 | 63357801 | 63358036 |
| chr7 | 69166601 | 69166776 |
| chr7 | 71041551 | 71042136 |

|      |          |          |
|------|----------|----------|
| chr7 | 71060941 | 71061146 |
| chr7 | 71070691 | 71070846 |
| chr7 | 71510071 | 71510366 |
| chr7 | 72563521 | 72563676 |
| chr7 | 73341551 | 73341726 |
| chr7 | 73375991 | 73376106 |
| chr7 | 73403891 | 73404376 |
| chr7 | 73450121 | 73450296 |
| chr7 | 73587581 | 73587676 |
| chr7 | 74707241 | 74707396 |
| chr7 | 74707531 | 74707666 |
| chr7 | 74723871 | 74724056 |
| chr7 | 74744231 | 74744386 |
| chr7 | 74842691 | 74842826 |
| chr7 | 74904421 | 74904546 |
| chr7 | 75128171 | 75128356 |
| chr7 | 75128891 | 75129126 |
| chr7 | 75144171 | 75144356 |
| chr7 | 75207301 | 75207546 |
| chr7 | 75230151 | 75230466 |
| chr7 | 75275951 | 75276126 |
| chr7 | 75293541 | 75293996 |
| chr7 | 77470781 | 77471026 |
| chr7 | 77476051 | 77476186 |
| chr7 | 77660951 | 77661086 |
| chr7 | 77729581 | 77729726 |
| chr7 | 80181731 | 80182136 |
| chr7 | 80341541 | 80341906 |
| chr7 | 80342031 | 80342566 |
| chr7 | 80343211 | 80343366 |
| chr7 | 80478571 | 80478736 |
| chr7 | 80479941 | 80480126 |
| chr7 | 80485421 | 80485616 |
| chr7 | 80493641 | 80493946 |
| chr7 | 80494111 | 80494476 |
| chr7 | 80516461 | 80516716 |
| chr7 | 80517341 | 80517516 |
| chr7 | 80519721 | 80519956 |
| chr7 | 80520121 | 80520246 |
| chr7 | 80522151 | 80522446 |
| chr7 | 80534801 | 80534956 |
| chr7 | 80538771 | 80538916 |
| chr7 | 80543411 | 80544586 |
| chr7 | 80544611 | 80544876 |
| chr7 | 80546101 | 80546246 |
| chr7 | 80557391 | 80557946 |
| chr7 | 80561181 | 80561536 |
| chr7 | 80566251 | 80566426 |
| chr7 | 80734631 | 80734766 |
| chr7 | 81520111 | 81520336 |
| chr7 | 81520871 | 81521016 |
| chr7 | 82800701 | 82800816 |
| chr7 | 82801101 | 82801356 |

|      |           |           |
|------|-----------|-----------|
| chr7 | 82814471  | 82814596  |
| chr7 | 82998091  | 82998286  |
| chr7 | 86347841  | 86348056  |
| chr7 | 86867621  | 86867756  |
| chr7 | 86868211  | 86868366  |
| chr7 | 86875981  | 86876146  |
| chr7 | 86876951  | 86877086  |
| chr7 | 86878761  | 86878926  |
| chr7 | 86879811  | 86879996  |
| chr7 | 86880131  | 86880356  |
| chr7 | 86882511  | 86882776  |
| chr7 | 86884961  | 86885216  |
| chr7 | 86927061  | 86927406  |
| chr7 | 86967261  | 86967376  |
| chr7 | 87003941  | 87004076  |
| chr7 | 87178001  | 87178216  |
| chr7 | 87210231  | 87210356  |
| chr7 | 87224021  | 87224136  |
| chr7 | 87236461  | 87236666  |
| chr7 | 87301991  | 87302206  |
| chr7 | 87329881  | 87330066  |
| chr7 | 87338801  | 87339056  |
| chr7 | 87347461  | 87347586  |
| chr7 | 87348531  | 87348936  |
| chr7 | 87473721  | 87473986  |
| chr7 | 87474231  | 87474486  |
| chr7 | 87497751  | 87497866  |
| chr7 | 87497891  | 87497996  |
| chr7 | 87781941  | 87782066  |
| chr7 | 87830531  | 87830726  |
| chr7 | 88037961  | 88038216  |
| chr7 | 88089891  | 88090146  |
| chr7 | 88091311  | 88091436  |
| chr7 | 88926111  | 88926456  |
| chr7 | 89113271  | 89113526  |
| chr7 | 89739401  | 89739626  |
| chr7 | 91031311  | 91031426  |
| chr7 | 96486371  | 96486606  |
| chr7 | 97168171  | 97168426  |
| chr7 | 97211361  | 97211616  |
| chr7 | 99931851  | 99932356  |
| chr7 | 99932481  | 99932726  |
| chr7 | 103904891 | 103905006 |
| chr7 | 104134421 | 104134656 |
| chr7 | 104498191 | 104498306 |
| chr7 | 104504341 | 104504576 |
| chr7 | 104565271 | 104565396 |
| chr7 | 104565921 | 104566046 |
| chr7 | 104596191 | 104596316 |
| chr7 | 105503021 | 105503366 |
| chr7 | 105506431 | 105506566 |
| chr7 | 105566711 | 105566846 |
| chr7 | 105648071 | 105648276 |

|      |           |           |
|------|-----------|-----------|
| chr7 | 105932811 | 105933076 |
| chr7 | 105997951 | 105998196 |
| chr7 | 106053231 | 106053596 |
| chr7 | 106053701 | 106053906 |
| chr7 | 106096381 | 106096636 |
| chr7 | 106173281 | 106173496 |
| chr7 | 106178131 | 106178276 |
| chr7 | 106205911 | 106206066 |
| chr7 | 106263431 | 106263656 |
| chr7 | 106294771 | 106294936 |
| chr7 | 106302411 | 106302636 |
| chr7 | 106304091 | 106304406 |
| chr7 | 106304461 | 106304926 |
| chr7 | 106311661 | 106311796 |
| chr7 | 106316581 | 106316816 |
| chr7 | 106320011 | 106320126 |
| chr7 | 106321711 | 106321966 |
| chr7 | 106322971 | 106323116 |
| chr7 | 106323311 | 106323696 |
| chr7 | 106323721 | 106323986 |
| chr7 | 106324251 | 106324576 |
| chr7 | 106327871 | 106328116 |
| chr7 | 106363611 | 106363906 |
| chr7 | 106365291 | 106365466 |
| chr7 | 106377271 | 106377446 |
| chr7 | 106377611 | 106377746 |
| chr7 | 106439241 | 106439406 |
| chr7 | 106443571 | 106443736 |
| chr7 | 106450941 | 106451136 |
| chr7 | 106461561 | 106461806 |
| chr7 | 106467811 | 106467986 |
| chr7 | 106477331 | 106477476 |
| chr7 | 106696691 | 106697056 |
| chr7 | 106701181 | 106701436 |
| chr7 | 107619791 | 107619906 |
| chr7 | 107649011 | 107649126 |
| chr7 | 107688211 | 107688496 |
| chr7 | 108056901 | 108057086 |
| chr7 | 108071241 | 108071596 |
| chr7 | 108071911 | 108072096 |
| chr7 | 108510441 | 108510726 |
| chr7 | 108533891 | 108534136 |
| chr7 | 109149541 | 109149656 |
| chr7 | 109380931 | 109381276 |
| chr7 | 109544401 | 109544776 |
| chr7 | 111982191 | 111982366 |
| chr7 | 112334251 | 112334396 |
| chr7 | 116669301 | 116669456 |
| chr7 | 116669571 | 116669816 |
| chr7 | 116689311 | 116689426 |
| chr7 | 116705021 | 116705186 |
| chr7 | 116710681 | 116710866 |
| chr7 | 117203041 | 117203186 |

|      |           |           |
|------|-----------|-----------|
| chr7 | 117441591 | 117441826 |
| chr7 | 117774881 | 117775286 |
| chr7 | 117842491 | 117842656 |
| chr7 | 117851691 | 117851866 |
| chr7 | 117884211 | 117884396 |
| chr7 | 117921641 | 117921766 |
| chr7 | 117954501 | 117954736 |
| chr7 | 117961741 | 117961996 |
| chr7 | 118093491 | 118093766 |
| chr7 | 118303061 | 118303246 |
| chr7 | 118759731 | 118760086 |
| chr7 | 118784871 | 118784996 |
| chr7 | 118835721 | 118835906 |
| chr7 | 118836291 | 118836606 |
| chr7 | 119269611 | 119269866 |
| chr7 | 119328541 | 119328926 |
| chr7 | 119340931 | 119341116 |
| chr7 | 119375341 | 119375576 |
| chr7 | 119382681 | 119382806 |
| chr7 | 119600001 | 119600206 |
| chr7 | 119615481 | 119615616 |
| chr7 | 119622691 | 119622786 |
| chr7 | 119622881 | 119623066 |
| chr7 | 119639751 | 119639856 |
| chr7 | 119787801 | 119788206 |
| chr7 | 119830881 | 119831046 |
| chr7 | 119887061 | 119887226 |
| chr7 | 119930521 | 119930636 |
| chr7 | 119931241 | 119931416 |
| chr7 | 119931811 | 119932086 |
| chr7 | 119969711 | 119969856 |
| chr7 | 120340971 | 120341196 |
| chr7 | 120386171 | 120386346 |
| chr7 | 121213801 | 121214066 |
| chr7 | 121231021 | 121231156 |
| chr7 | 121247291 | 121247506 |
| chr7 | 121253171 | 121253376 |
| chr7 | 121293341 | 121293586 |
| chr7 | 121436241 | 121436496 |
| chr7 | 123478701 | 123478826 |
| chr7 | 125908281 | 125908506 |
| chr7 | 126119741 | 126120376 |
| chr7 | 126127521 | 126127986 |
| chr7 | 126893831 | 126894046 |
| chr7 | 127022761 | 127023006 |
| chr7 | 127036291 | 127036426 |
| chr7 | 127103891 | 127104116 |
| chr7 | 128016611 | 128016976 |
| chr7 | 128826681 | 128826826 |
| chr7 | 130325621 | 130325816 |
| chr7 | 130485501 | 130485656 |
| chr7 | 132720291 | 132720716 |
| chr7 | 132721291 | 132721436 |

|      |           |           |
|------|-----------|-----------|
| chr7 | 132874601 | 132874886 |
| chr7 | 133424091 | 133424236 |
| chr7 | 133727071 | 133727426 |
| chr7 | 133730531 | 133731086 |
| chr7 | 133766531 | 133766766 |
| chr7 | 133768141 | 133768426 |
| chr7 | 133807211 | 133807526 |
| chr7 | 133807531 | 133807876 |
| chr7 | 133951321 | 133951436 |
| chr7 | 134486981 | 134487096 |
| chr7 | 134708211 | 134708406 |
| chr7 | 134806291 | 134806536 |
| chr7 | 134958821 | 134958986 |
| chr7 | 134959481 | 134959626 |
| chr7 | 134984441 | 134984776 |
| chr7 | 135029711 | 135029826 |
| chr7 | 135455441 | 135455756 |
| chr7 | 135488381 | 135488536 |
| chr7 | 135786041 | 135786206 |
| chr7 | 135790971 | 135791206 |
| chr7 | 135872471 | 135872586 |
| chr7 | 135882191 | 135882416 |
| chr7 | 136803391 | 136803696 |
| chr7 | 136945071 | 136945196 |
| chr7 | 137062151 | 137062356 |
| chr7 | 137064771 | 137065016 |
| chr7 | 137069451 | 137069616 |
| chr7 | 137107951 | 137108156 |
| chr7 | 137128141 | 137128376 |
| chr7 | 137128431 | 137128696 |
| chr7 | 137145351 | 137145676 |
| chr7 | 137159601 | 137159986 |
| chr7 | 137180881 | 137181506 |
| chr7 | 137242331 | 137242586 |
| chr7 | 137317551 | 137317806 |
| chr7 | 137318071 | 137318336 |
| chr7 | 137407391 | 137407526 |
| chr7 | 137407831 | 137407946 |
| chr7 | 137407951 | 137408066 |
| chr7 | 137468811 | 137468986 |
| chr7 | 137469541 | 137469866 |
| chr7 | 137524621 | 137524736 |
| chr7 | 137651051 | 137651176 |
| chr7 | 137775061 | 137775316 |
| chr7 | 137801121 | 137801306 |
| chr7 | 137960701 | 137960926 |
| chr7 | 138533181 | 138533406 |
| chr7 | 139760581 | 139760706 |
| chr7 | 139763131 | 139763436 |
| chr7 | 139862031 | 139862276 |
| chr7 | 139862561 | 139862816 |
| chr7 | 139892971 | 139893116 |
| chr7 | 139915661 | 139915956 |



|      |           |           |
|------|-----------|-----------|
| chr7 | 139922361 | 139922556 |
| chr7 | 139958191 | 139958546 |
| chr7 | 139969511 | 139969766 |
| chr7 | 139977111 | 139977266 |
| chr7 | 139996211 | 139996436 |
| chr7 | 140001241 | 140001586 |
| chr7 | 140290911 | 140291056 |
| chr7 | 140946031 | 140946176 |
| chr7 | 140957571 | 140957866 |
| chr7 | 141217981 | 141218216 |
| chr7 | 141223631 | 141223726 |
| chr7 | 141290831 | 141291016 |
| chr7 | 141651731 | 141651896 |
| chr7 | 142196141 | 142196346 |
| chr7 | 142220961 | 142221316 |
| chr7 | 144239901 | 144240076 |
| chr7 | 144260511 | 144260626 |
| chr7 | 144261671 | 144261926 |
| chr7 | 144261941 | 144262196 |
| chr7 | 144264841 | 144265006 |
| chr7 | 144265121 | 144265316 |
| chr7 | 144339041 | 144339256 |
| chr7 | 144363791 | 144363906 |
| chr7 | 144414621 | 144414876 |
| chr7 | 144637251 | 144637496 |
| chr7 | 144646101 | 144646216 |
| chr7 | 144658411 | 144658656 |
| chr7 | 146077001 | 146077386 |
| chr7 | 146093641 | 146093926 |
| chr7 | 146094441 | 146094746 |
| chr7 | 146094871 | 146094966 |
| chr7 | 146101341 | 146101466 |
| chr7 | 146102191 | 146102446 |
| chr7 | 146198971 | 146199186 |
| chr7 | 146461551 | 146461826 |
| chr7 | 146494441 | 146494656 |
| chr7 | 146585891 | 146585996 |
| chr7 | 146624181 | 146624436 |
| chr7 | 146636301 | 146636556 |
| chr7 | 146696821 | 146697116 |
| chr7 | 148085311 | 148085526 |
| chr7 | 148086291 | 148086376 |
| chr7 | 148088761 | 148088986 |
| chr7 | 148402871 | 148403146 |
| chr7 | 148403331 | 148403576 |
| chr7 | 148445401 | 148445496 |
| chr7 | 148570311 | 148570676 |
| chr7 | 148643411 | 148643586 |
| chr7 | 148643791 | 148644486 |
| chr7 | 148645001 | 148645136 |
| chr7 | 148645371 | 148645686 |
| chr7 | 148646591 | 148646856 |
| chr7 | 148647161 | 148647296 |

|      |           |           |
|------|-----------|-----------|
| chr7 | 148647961 | 148648296 |
| chr7 | 148658201 | 148658376 |
| chr7 | 149570551 | 149570726 |
| chr7 | 149681371 | 149681476 |
| chr7 | 149695471 | 149695906 |
| chr7 | 149715121 | 149715736 |
| chr7 | 149718681 | 149718856 |
| chr7 | 150473291 | 150473466 |
| chr7 | 150499821 | 150500086 |
| chr7 | 150722361 | 150722596 |
| chr7 | 150991631 | 150991806 |
| chr7 | 151027751 | 151027906 |
| chr7 | 151635301 | 151635546 |
| chr7 | 152442361 | 152442486 |
| chr6 | 3151301   | 3151526   |
| chr6 | 3497791   | 3497996   |
| chr6 | 3970131   | 3970386   |
| chr6 | 4368281   | 4368536   |
| chr6 | 4507791   | 4507926   |
| chr6 | 4631521   | 4631636   |
| chr6 | 4757361   | 4757506   |
| chr6 | 4840191   | 4840316   |
| chr6 | 5149381   | 5149576   |
| chr6 | 5393721   | 5393846   |
| chr6 | 5395801   | 5396016   |
| chr6 | 5397441   | 5397656   |
| chr6 | 5448891   | 5449126   |
| chr6 | 5941981   | 5942156   |
| chr6 | 6127721   | 6127866   |
| chr6 | 6249321   | 6249546   |
| chr6 | 8036221   | 8036406   |
| chr6 | 8171991   | 8172166   |
| chr6 | 8217461   | 8217726   |
| chr6 | 8287081   | 8287306   |
| chr6 | 8304831   | 8304986   |
| chr6 | 8408361   | 8408636   |
| chr6 | 8417221   | 8417356   |
| chr6 | 8418291   | 8418426   |
| chr6 | 8461181   | 8461376   |
| chr6 | 8665271   | 8665386   |
| chr6 | 12331031  | 12331166  |
| chr6 | 12748611  | 12748796  |
| chr6 | 12776241  | 12776356  |
| chr6 | 15739671  | 15739916  |
| chr6 | 17006241  | 17006356  |
| chr6 | 17120441  | 17120596  |
| chr6 | 17266911  | 17267166  |
| chr6 | 17285241  | 17285436  |
| chr6 | 17368181  | 17368316  |
| chr6 | 17435981  | 17436156  |
| chr6 | 17496641  | 17496826  |
| chr6 | 17525801  | 17525936  |
| chr6 | 17539431  | 17539616  |

|      |          |          |
|------|----------|----------|
| chr6 | 17697691 | 17697936 |
| chr6 | 20835371 | 20835526 |
| chr6 | 21754241 | 21754666 |
| chr6 | 21755021 | 21755196 |
| chr6 | 21756031 | 21756516 |
| chr6 | 21773191 | 21773886 |
| chr6 | 21789811 | 21790076 |
| chr6 | 21790331 | 21790586 |
| chr6 | 21960901 | 21961246 |
| chr6 | 21961251 | 21961566 |
| chr6 | 21969751 | 21969896 |
| chr6 | 24582981 | 24583196 |
| chr6 | 24584371 | 24584466 |
| chr6 | 24600941 | 24601116 |
| chr6 | 28368401 | 28368626 |
| chr6 | 28435861 | 28436096 |
| chr6 | 28565081 | 28565226 |
| chr6 | 28568771 | 28568946 |
| chr6 | 28587371 | 28587606 |
| chr6 | 28754951 | 28755096 |
| chr6 | 28760991 | 28761266 |
| chr6 | 28797481 | 28798016 |
| chr6 | 28800751 | 28800956 |
| chr6 | 28814671 | 28814926 |
| chr6 | 28816181 | 28816306 |
| chr6 | 28981051 | 28981226 |
| chr6 | 28981801 | 28981926 |
| chr6 | 28982281 | 28982506 |
| chr6 | 28982521 | 28982766 |
| chr6 | 28993571 | 28993786 |
| chr6 | 29009781 | 29010396 |
| chr6 | 29023451 | 29023666 |
| chr6 | 29037841 | 29038086 |
| chr6 | 29160521 | 29160676 |
| chr6 | 29164811 | 29165266 |
| chr6 | 29195861 | 29196006 |
| chr6 | 29219031 | 29219186 |
| chr6 | 29237151 | 29237276 |
| chr6 | 29698691 | 29698946 |
| chr6 | 29765081 | 29765336 |
| chr6 | 29772001 | 29772116 |
| chr6 | 29873511 | 29873636 |
| chr6 | 29944641 | 29944806 |
| chr6 | 29945271 | 29945406 |
| chr6 | 29952701 | 29952836 |
| chr6 | 29971631 | 29971786 |
| chr6 | 30107321 | 30107496 |
| chr6 | 30117481 | 30117686 |
| chr6 | 30120141 | 30120626 |
| chr6 | 30123081 | 30123196 |
| chr6 | 30162111 | 30162636 |
| chr6 | 30175411 | 30175586 |
| chr6 | 30213711 | 30213866 |

|      |          |          |
|------|----------|----------|
| chr6 | 30366521 | 30366686 |
| chr6 | 30419391 | 30419556 |
| chr6 | 30499471 | 30499836 |
| chr6 | 30502071 | 30502226 |
| chr6 | 30502371 | 30502536 |
| chr6 | 30502711 | 30503306 |
| chr6 | 30504681 | 30504966 |
| chr6 | 30564331 | 30564446 |
| chr6 | 30568201 | 30568406 |
| chr6 | 30570571 | 30570776 |
| chr6 | 30570861 | 30571166 |
| chr6 | 30592831 | 30592996 |
| chr6 | 30594031 | 30594536 |
| chr6 | 30602651 | 30603016 |
| chr6 | 30603411 | 30603886 |
| chr6 | 30647571 | 30647756 |
| chr6 | 31020391 | 31020956 |
| chr6 | 31042821 | 31043086 |
| chr6 | 31046391 | 31046646 |
| chr6 | 31063601 | 31063976 |
| chr6 | 31109441 | 31109576 |
| chr6 | 31122061 | 31122176 |
| chr6 | 31128281 | 31128546 |
| chr6 | 31142841 | 31143336 |
| chr6 | 31203271 | 31203496 |
| chr6 | 31212171 | 31212516 |
| chr6 | 31272091 | 31272306 |
| chr6 | 31410761 | 31410976 |
| chr6 | 31452371 | 31452566 |
| chr6 | 31452831 | 31453206 |
| chr6 | 31463371 | 31463636 |
| chr6 | 31468031 | 31468326 |
| chr6 | 32727401 | 32727656 |
| chr6 | 32810901 | 32811156 |
| chr6 | 32932691 | 32932836 |
| chr6 | 32972281 | 32972536 |
| chr6 | 32977341 | 32977686 |
| chr6 | 33245461 | 33245636 |
| chr6 | 33492641 | 33492896 |
| chr6 | 33493001 | 33493256 |
| chr6 | 33502591 | 33502816 |
| chr6 | 34113221 | 34113436 |
| chr6 | 34428111 | 34428396 |
| chr6 | 34445381 | 34445556 |
| chr6 | 34664731 | 34664846 |
| chr6 | 34671921 | 34672176 |
| chr6 | 34706171 | 34706286 |
| chr6 | 34812951 | 34813086 |
| chr6 | 34815331 | 34815466 |
| chr6 | 34857701 | 34857926 |
| chr6 | 34979701 | 34979886 |
| chr6 | 35001351 | 35001536 |
| chr6 | 35238591 | 35238776 |

|      |          |          |
|------|----------|----------|
| chr6 | 35239281 | 35239446 |
| chr6 | 35299741 | 35300216 |
| chr6 | 35321451 | 35321586 |
| chr6 | 36678071 | 36678326 |
| chr6 | 36750311 | 36750466 |
| chr6 | 37018721 | 37018886 |
| chr6 | 37218641 | 37218896 |
| chr6 | 37277661 | 37277826 |
| chr6 | 37277941 | 37278156 |
| chr6 | 37312091 | 37312486 |
| chr6 | 37352041 | 37352246 |
| chr6 | 37552951 | 37553086 |
| chr6 | 37613151 | 37613336 |
| chr6 | 37615681 | 37615826 |
| chr6 | 37673301 | 37673616 |
| chr6 | 37846161 | 37846276 |
| chr6 | 37952451 | 37952566 |
| chr6 | 38147041 | 38147236 |
| chr6 | 38149601 | 38149806 |
| chr6 | 38150051 | 38150196 |
| chr6 | 38478611 | 38478766 |
| chr6 | 38573781 | 38573956 |
| chr6 | 38719071 | 38719186 |
| chr6 | 38759381 | 38759506 |
| chr6 | 38759771 | 38760076 |
| chr6 | 38813641 | 38813866 |
| chr6 | 38830831 | 38831046 |
| chr6 | 38837441 | 38837716 |
| chr6 | 38999491 | 38999646 |
| chr6 | 39189431 | 39189576 |
| chr6 | 39199391 | 39199776 |
| chr6 | 39211961 | 39212236 |
| chr6 | 39214321 | 39214556 |
| chr6 | 39224911 | 39225066 |
| chr6 | 39234131 | 39234316 |
| chr6 | 39236371 | 39236636 |
| chr6 | 39268121 | 39268746 |
| chr6 | 39322581 | 39322756 |
| chr6 | 39388281 | 39388456 |
| chr6 | 39445001 | 39445236 |
| chr6 | 39489531 | 39489726 |
| chr6 | 39494161 | 39494376 |
| chr6 | 39504991 | 39505326 |
| chr6 | 39556081 | 39556256 |
| chr6 | 39556271 | 39556416 |
| chr6 | 39668631 | 39668886 |
| chr6 | 40256001 | 40256186 |
| chr6 | 40276331 | 40276606 |
| chr6 | 41989981 | 41990126 |
| chr6 | 42211911 | 42212046 |
| chr6 | 43353311 | 43353696 |
| chr6 | 47468361 | 47468616 |
| chr6 | 47597861 | 47597986 |

|      |          |          |
|------|----------|----------|
| chr6 | 47600941 | 47601076 |
| chr6 | 47716831 | 47717086 |
| chr6 | 47787831 | 47787946 |
| chr6 | 47852461 | 47852586 |
| chr6 | 48384951 | 48385166 |
| chr6 | 48395341 | 48395456 |
| chr6 | 48396031 | 48396136 |
| chr6 | 48479961 | 48480116 |
| chr6 | 48543451 | 48543626 |
| chr6 | 48774851 | 48775266 |
| chr6 | 49056751 | 49057026 |
| chr6 | 49100381 | 49100626 |
| chr6 | 49100771 | 49100936 |
| chr6 | 49101121 | 49101286 |
| chr6 | 49121341 | 49121686 |
| chr6 | 49123821 | 49124046 |
| chr6 | 49125241 | 49125456 |
| chr6 | 49296471 | 49296646 |
| chr6 | 50377071 | 50377256 |
| chr6 | 50377671 | 50377846 |
| chr6 | 50966491 | 50966696 |
| chr6 | 51028271 | 51028556 |
| chr6 | 51218891 | 51219326 |
| chr6 | 51234121 | 51234376 |
| chr6 | 51234511 | 51234636 |
| chr6 | 51234941 | 51235276 |
| chr6 | 51282441 | 51282596 |
| chr6 | 51282851 | 51283136 |
| chr6 | 51283241 | 51283566 |
| chr6 | 51284751 | 51284926 |
| chr6 | 51312031 | 51312226 |
| chr6 | 51323141 | 51323286 |
| chr6 | 51329541 | 51329736 |
| chr6 | 51439461 | 51439666 |
| chr6 | 51504861 | 51505206 |
| chr6 | 51528681 | 51528826 |
| chr6 | 51562621 | 51562736 |
| chr6 | 51630211 | 51630426 |
| chr6 | 51630441 | 51630676 |
| chr6 | 51832311 | 51832606 |
| chr6 | 51836761 | 51837086 |
| chr6 | 52017241 | 52017406 |
| chr6 | 52088751 | 52088876 |
| chr6 | 52140421 | 52140726 |
| chr6 | 52147451 | 52147606 |
| chr6 | 52150101 | 52150226 |
| chr6 | 52150241 | 52150476 |
| chr6 | 52153391 | 52153506 |
| chr6 | 52534421 | 52534676 |
| chr6 | 52623781 | 52624076 |
| chr6 | 52624461 | 52624756 |
| chr6 | 52724921 | 52725176 |
| chr6 | 52746111 | 52746336 |

|      |          |          |
|------|----------|----------|
| chr6 | 53012721 | 53012946 |
| chr6 | 53446661 | 53446916 |
| chr6 | 53474371 | 53474556 |
| chr6 | 53604241 | 53604486 |
| chr6 | 53728891 | 53729086 |
| chr6 | 53805501 | 53805696 |
| chr6 | 54008741 | 54009076 |
| chr6 | 54013911 | 54014076 |
| chr6 | 54283531 | 54283776 |
| chr6 | 54554591 | 54554716 |
| chr6 | 54668901 | 54669156 |
| chr6 | 54709051 | 54709386 |
| chr6 | 54727731 | 54727956 |
| chr6 | 54727981 | 54728096 |
| chr6 | 54737361 | 54737576 |
| chr6 | 54777361 | 54777726 |
| chr6 | 54907651 | 54907826 |
| chr6 | 54908011 | 54908126 |
| chr6 | 54992981 | 54993336 |
| chr6 | 54999661 | 54999776 |
| chr6 | 55030511 | 55030716 |
| chr6 | 55030841 | 55030966 |
| chr6 | 55174091 | 55174216 |
| chr6 | 55200711 | 55201136 |
| chr6 | 55209511 | 55209816 |
| chr6 | 55225911 | 55226256 |
| chr6 | 55232091 | 55232356 |
| chr6 | 55285961 | 55286186 |
| chr6 | 55434271 | 55434446 |
| chr6 | 56784561 | 56784816 |
| chr6 | 56784891 | 56785226 |
| chr6 | 56795921 | 56796036 |
| chr6 | 56851821 | 56852066 |
| chr6 | 56853971 | 56854116 |
| chr6 | 58829821 | 58829996 |
| chr6 | 58844001 | 58844196 |
| chr6 | 58880211 | 58880486 |
| chr6 | 58915501 | 58915746 |
| chr6 | 58918581 | 58918716 |
| chr6 | 58981621 | 58981896 |
| chr6 | 61208871 | 61208986 |
| chr6 | 62728061 | 62728206 |
| chr6 | 66853861 | 66854006 |
| chr6 | 66922461 | 66922646 |
| chr6 | 66922791 | 66922906 |
| chr6 | 66922921 | 66923046 |
| chr6 | 66942771 | 66943026 |
| chr6 | 66977501 | 66977696 |
| chr6 | 67026121 | 67026336 |
| chr6 | 67036191 | 67036346 |
| chr6 | 67041301 | 67041416 |
| chr6 | 67086021 | 67086196 |
| chr6 | 71220941 | 71221056 |

|      |          |          |
|------|----------|----------|
| chr6 | 71279751 | 71279886 |
| chr6 | 71500031 | 71500166 |
| chr6 | 71533461 | 71533656 |
| chr6 | 71567931 | 71568096 |
| chr6 | 71568171 | 71568426 |
| chr6 | 71581251 | 71581506 |
| chr6 | 71663301 | 71663436 |
| chr6 | 71766091 | 71766216 |
| chr6 | 72060161 | 72060316 |
| chr6 | 72064341 | 72064496 |
| chr6 | 72131191 | 72131356 |
| chr6 | 72154881 | 72155086 |
| chr6 | 72155311 | 72155526 |
| chr6 | 72161061 | 72161336 |
| chr6 | 72181331 | 72181766 |
| chr6 | 72195041 | 72195196 |
| chr6 | 72222001 | 72222356 |
| chr6 | 72230391 | 72230546 |
| chr6 | 72410571 | 72410766 |
| chr6 | 72424181 | 72424516 |
| chr6 | 72451361 | 72451606 |
| chr6 | 72454441 | 72454706 |
| chr6 | 72460501 | 72460976 |
| chr6 | 72462701 | 72463016 |
| chr6 | 72482091 | 72482346 |
| chr6 | 72531781 | 72532136 |
| chr6 | 72547171 | 72547416 |
| chr6 | 72548141 | 72548266 |
| chr6 | 72550201 | 72550476 |
| chr6 | 72553801 | 72554006 |
| chr6 | 72586291 | 72586546 |
| chr6 | 72600601 | 72600726 |
| chr6 | 72603821 | 72603996 |
| chr6 | 72620651 | 72620896 |
| chr6 | 72621271 | 72621526 |
| chr6 | 72622791 | 72623106 |
| chr6 | 72623411 | 72623526 |
| chr6 | 72626691 | 72626896 |
| chr6 | 72628731 | 72629026 |
| chr6 | 72640631 | 72641026 |
| chr6 | 72642521 | 72642696 |
| chr6 | 72642771 | 72642926 |
| chr6 | 72644271 | 72644426 |
| chr6 | 72654491 | 72655086 |
| chr6 | 72662841 | 72663076 |
| chr6 | 72664091 | 72664236 |
| chr6 | 72681951 | 72682186 |
| chr6 | 72686951 | 72687296 |
| chr6 | 72690561 | 72691216 |
| chr6 | 72692451 | 72692656 |
| chr6 | 72718721 | 72718976 |
| chr6 | 72720091 | 72720336 |
| chr6 | 72729141 | 72729276 |



|      |          |          |
|------|----------|----------|
| chr6 | 72732581 | 72732836 |
| chr6 | 72737301 | 72737506 |
| chr6 | 72745561 | 72745816 |
| chr6 | 72930351 | 72930586 |
| chr6 | 72962161 | 72962416 |
| chr6 | 73229851 | 73229956 |
| chr6 | 82701181 | 82701446 |
| chr6 | 82702101 | 82702426 |
| chr6 | 82714121 | 82714366 |
| chr6 | 82720641 | 82721576 |
| chr6 | 82785611 | 82785726 |
| chr6 | 82812531 | 82813486 |
| chr6 | 82822491 | 82822736 |
| chr6 | 83002101 | 83002336 |
| chr6 | 83033551 | 83033666 |
| chr6 | 83047991 | 83048126 |
| chr6 | 83069751 | 83069996 |
| chr6 | 83070161 | 83070276 |
| chr6 | 83252121 | 83252516 |
| chr6 | 83255491 | 83255716 |
| chr6 | 83358761 | 83358926 |
| chr6 | 83363261 | 83363526 |
| chr6 | 83394131 | 83394366 |
| chr6 | 83446541 | 83446676 |
| chr6 | 83447111 | 83447356 |
| chr6 | 83447441 | 83448196 |
| chr6 | 83454511 | 83454686 |
| chr6 | 83993411 | 83993646 |
| chr6 | 84050921 | 84051056 |
| chr6 | 84061301 | 84061516 |
| chr6 | 84089641 | 84089796 |
| chr6 | 84093731 | 84093846 |
| chr6 | 84218491 | 84218656 |
| chr6 | 84269811 | 84269996 |
| chr6 | 84367171 | 84367416 |
| chr6 | 84647711 | 84647926 |
| chr6 | 85138981 | 85139096 |
| chr6 | 85174211 | 85174526 |
| chr6 | 85201691 | 85201946 |
| chr6 | 85284781 | 85284926 |
| chr6 | 85292761 | 85292906 |
| chr6 | 85293161 | 85293416 |
| chr6 | 85391121 | 85391366 |
| chr6 | 85900371 | 85900486 |
| chr6 | 86316531 | 86316796 |
| chr6 | 86329821 | 86329976 |
| chr6 | 86344821 | 86345376 |
| chr6 | 86437511 | 86437806 |
| chr6 | 86447171 | 86447466 |
| chr6 | 86520831 | 86520996 |
| chr6 | 86590121 | 86590426 |
| chr6 | 86689841 | 86690066 |
| chr6 | 86732161 | 86732296 |

|      |          |          |
|------|----------|----------|
| chr6 | 86810881 | 86811136 |
| chr6 | 86821901 | 86822026 |
| chr6 | 86824751 | 86824896 |
| chr6 | 87079451 | 87079776 |
| chr6 | 87079891 | 87080256 |
| chr6 | 87093621 | 87093776 |
| chr6 | 87093951 | 87094166 |
| chr6 | 87157751 | 87157896 |
| chr6 | 87192801 | 87192926 |
| chr6 | 87209021 | 87209216 |
| chr6 | 87215271 | 87215446 |
| chr6 | 87232611 | 87232816 |
| chr6 | 87332691 | 87332816 |
| chr6 | 87334741 | 87334876 |
| chr6 | 87730011 | 87730136 |
| chr6 | 87759951 | 87760186 |
| chr6 | 87822621 | 87822746 |
| chr6 | 87846371 | 87846596 |
| chr6 | 87860801 | 87860966 |
| chr6 | 87959451 | 87959566 |
| chr6 | 87977731 | 87977846 |
| chr6 | 88143341 | 88143566 |
| chr6 | 88221221 | 88221376 |
| chr6 | 88439681 | 88439936 |
| chr6 | 88681131 | 88681366 |
| chr6 | 88681651 | 88681986 |
| chr6 | 88684321 | 88684546 |
| chr6 | 88709771 | 88710326 |
| chr6 | 88722091 | 88722336 |
| chr6 | 88735551 | 88735736 |
| chr6 | 89165151 | 89165286 |
| chr6 | 89186601 | 89186696 |
| chr6 | 89309871 | 89310216 |
| chr6 | 89310711 | 89310946 |
| chr6 | 89320091 | 89320286 |
| chr6 | 89403471 | 89403756 |
| chr6 | 89436221 | 89436326 |
| chr6 | 89596871 | 89597026 |
| chr6 | 90416381 | 90416636 |
| chr6 | 90421471 | 90421656 |
| chr6 | 90462501 | 90462746 |
| chr6 | 90484391 | 90484526 |
| chr6 | 90571521 | 90571666 |
| chr6 | 90611441 | 90611656 |
| chr6 | 90655921 | 90656176 |
| chr6 | 90656591 | 90656846 |
| chr6 | 90657391 | 90657516 |
| chr6 | 90663191 | 90663336 |
| chr6 | 91436731 | 91437056 |
| chr6 | 91444211 | 91444456 |
| chr6 | 91478271 | 91478866 |
| chr6 | 91492621 | 91492896 |
| chr6 | 91496681 | 91496796 |

|      |          |          |
|------|----------|----------|
| chr6 | 91532371 | 91532536 |
| chr6 | 91628821 | 91629016 |
| chr6 | 91678501 | 91678646 |
| chr6 | 91702051 | 91702466 |
| chr6 | 91702771 | 91702966 |
| chr6 | 92713371 | 92713626 |
| chr6 | 92737081 | 92737386 |
| chr6 | 92893551 | 92893686 |
| chr6 | 92893841 | 92894096 |
| chr6 | 93122151 | 93122426 |
| chr6 | 93223641 | 93223826 |
| chr6 | 93273571 | 93273766 |
| chr6 | 93649581 | 93649826 |
| chr6 | 93672711 | 93672966 |
| chr6 | 93673011 | 93673246 |
| chr6 | 93676951 | 93677096 |
| chr6 | 93677871 | 93678416 |
| chr6 | 93678691 | 93678806 |
| chr6 | 93721101 | 93721326 |
| chr6 | 93903701 | 93903816 |
| chr6 | 93961601 | 93961716 |
| chr6 | 94017851 | 94018106 |
| chr6 | 94026041 | 94026206 |
| chr6 | 94034541 | 94034706 |
| chr6 | 94102681 | 94103256 |
| chr6 | 94133271 | 94133626 |
| chr6 | 94143791 | 94144016 |
| chr6 | 94159351 | 94159596 |
| chr6 | 94214511 | 94214746 |
| chr6 | 94350681 | 94350846 |
| chr6 | 94478721 | 94478836 |
| chr6 | 94480941 | 94481056 |
| chr6 | 94495441 | 94495756 |
| chr6 | 94496041 | 94496156 |
| chr6 | 94500091 | 94500266 |
| chr6 | 94544651 | 94544896 |
| chr6 | 94546911 | 94547336 |
| chr6 | 94548501 | 94548756 |
| chr6 | 94549141 | 94549386 |
| chr6 | 94555031 | 94555446 |
| chr6 | 94566721 | 94566916 |
| chr6 | 94569081 | 94569486 |
| chr6 | 94570761 | 94571046 |
| chr6 | 94571281 | 94571426 |
| chr6 | 94583111 | 94583406 |
| chr6 | 94584461 | 94584726 |
| chr6 | 94584991 | 94585216 |
| chr6 | 94586821 | 94586966 |
| chr6 | 94588541 | 94588666 |
| chr6 | 94600411 | 94600666 |
| chr6 | 94607941 | 94608106 |
| chr6 | 94608611 | 94608886 |
| chr6 | 94611021 | 94611616 |

|      |          |          |
|------|----------|----------|
| chr6 | 94611841 | 94612216 |
| chr6 | 94613701 | 94613936 |
| chr6 | 94614081 | 94614186 |
| chr6 | 94616561 | 94616686 |
| chr6 | 94617211 | 94617806 |
| chr6 | 94618351 | 94618616 |
| chr6 | 94619941 | 94620126 |
| chr6 | 94621051 | 94621466 |
| chr6 | 94623721 | 94623896 |
| chr6 | 94624181 | 94624476 |
| chr6 | 94625431 | 94625766 |
| chr6 | 94625921 | 94626176 |
| chr6 | 94626441 | 94626846 |
| chr6 | 94626891 | 94627396 |
| chr6 | 94629651 | 94629846 |
| chr6 | 94630001 | 94630256 |
| chr6 | 94630931 | 94631056 |
| chr6 | 94635311 | 94635666 |
| chr6 | 94636201 | 94636496 |
| chr6 | 94636621 | 94637326 |
| chr6 | 94640231 | 94640586 |
| chr6 | 94641051 | 94641216 |
| chr6 | 94643191 | 94643586 |
| chr6 | 94645481 | 94645846 |
| chr6 | 94645851 | 94646416 |
| chr6 | 94646441 | 94646546 |
| chr6 | 94647061 | 94647296 |
| chr6 | 94668721 | 94668836 |
| chr6 | 94732471 | 94732616 |
| chr6 | 94849091 | 94849216 |
| chr6 | 94866111 | 94866246 |
| chr6 | 94900701 | 94901096 |
| chr6 | 94907661 | 94908066 |
| chr6 | 95419521 | 95419646 |
| chr6 | 95432901 | 95433096 |
| chr6 | 95433401 | 95433636 |
| chr6 | 95546901 | 95547016 |
| chr6 | 95558481 | 95558676 |
| chr6 | 95651581 | 95652476 |
| chr6 | 95662561 | 95662766 |
| chr6 | 95663041 | 95663196 |
| chr6 | 98793871 | 98794076 |
| chr6 | 98981691 | 98982186 |
| chr6 | 99109831 | 99110006 |
| chr6 | 99122741 | 99122986 |
| chr6 | 99285251 | 99285866 |
| chr6 | 99309331 | 99309466 |
| chr6 | 99328861 | 99328996 |
| chr6 | 99389211 | 99389386 |
| chr6 | 99425201 | 99425426 |
| chr6 | 99434231 | 99434486 |
| chr6 | 99446411 | 99446536 |
| chr6 | 99459181 | 99459346 |

|      |           |           |
|------|-----------|-----------|
| chr6 | 99566871  | 99566986  |
| chr6 | 99755001  | 99755246  |
| chr6 | 99762661  | 99762876  |
| chr6 | 99859921  | 99860176  |
| chr6 | 99919331  | 99919456  |
| chr6 | 100177821 | 100177946 |
| chr6 | 100182371 | 100182516 |
| chr6 | 100285631 | 100285806 |
| chr6 | 100286051 | 100286216 |
| chr6 | 100412461 | 100412626 |
| chr6 | 100595431 | 100595766 |
| chr6 | 100732081 | 100732326 |
| chr6 | 100752771 | 100753066 |
| chr6 | 100779211 | 100779446 |
| chr6 | 100779661 | 100779786 |
| chr6 | 100781581 | 100781706 |
| chr6 | 100812011 | 100812266 |
| chr6 | 101201291 | 101201406 |
| chr6 | 101228301 | 101228496 |
| chr6 | 101240061 | 101240196 |
| chr6 | 101272611 | 101272726 |
| chr6 | 108074571 | 108074806 |
| chr6 | 108184681 | 108184856 |
| chr6 | 108187901 | 108188036 |
| chr6 | 108188151 | 108188296 |
| chr6 | 108198671 | 108198826 |
| chr6 | 108199211 | 108199546 |
| chr6 | 108200161 | 108200466 |
| chr6 | 108376821 | 108377046 |
| chr6 | 108386891 | 108387016 |
| chr6 | 108395061 | 108395196 |
| chr6 | 108407781 | 108408256 |
| chr6 | 108408771 | 108409026 |
| chr6 | 108432681 | 108432796 |
| chr6 | 108437551 | 108437806 |
| chr6 | 108460231 | 108460386 |
| chr6 | 108484911 | 108485076 |
| chr6 | 108504851 | 108505006 |
| chr6 | 108520231 | 108521256 |
| chr6 | 108608661 | 108608776 |
| chr6 | 108612551 | 108612666 |
| chr6 | 108612841 | 108613036 |
| chr6 | 108614701 | 108614976 |
| chr6 | 108617471 | 108617756 |
| chr6 | 108617821 | 108618106 |
| chr6 | 108618281 | 108618786 |
| chr6 | 108779661 | 108779976 |
| chr6 | 112739871 | 112740016 |
| chr6 | 112802631 | 112802756 |
| chr6 | 112891021 | 112891276 |
| chr6 | 113217401 | 113217546 |
| chr6 | 113375561 | 113375856 |
| chr6 | 113376871 | 113377016 |

|      |           |           |
|------|-----------|-----------|
| chr6 | 113377801 | 113378276 |
| chr6 | 113383181 | 113383346 |
| chr6 | 113384451 | 113384706 |
| chr6 | 113385401 | 113385706 |
| chr6 | 113422201 | 113422396 |
| chr6 | 113473321 | 113473636 |
| chr6 | 113558931 | 113559046 |
| chr6 | 113559071 | 113559316 |
| chr6 | 113594371 | 113594636 |
| chr6 | 113594991 | 113595286 |
| chr6 | 113604131 | 113604366 |
| chr6 | 113625621 | 113625746 |
| chr6 | 113629921 | 113630106 |
| chr6 | 113734451 | 113734616 |
| chr6 | 114614931 | 114615086 |
| chr6 | 114636031 | 114636286 |
| chr6 | 114636501 | 114636646 |
| chr6 | 114683741 | 114683926 |
| chr6 | 114754271 | 114754396 |
| chr6 | 114783121 | 114783296 |
| chr6 | 114784101 | 114784686 |
| chr6 | 114808841 | 114809226 |
| chr6 | 114810121 | 114810266 |
| chr6 | 114811621 | 114812066 |
| chr6 | 114814181 | 114814326 |
| chr6 | 114814521 | 114814816 |
| chr6 | 114823921 | 114824086 |
| chr6 | 114829711 | 114829966 |
| chr6 | 114832321 | 114832516 |
| chr6 | 114832621 | 114833266 |
| chr6 | 114833661 | 114833806 |
| chr6 | 114834641 | 114834896 |
| chr6 | 114836641 | 114837476 |
| chr6 | 114840621 | 114840806 |
| chr6 | 114842251 | 114842376 |
| chr6 | 114842951 | 114843386 |
| chr6 | 114843391 | 114844206 |
| chr6 | 114844611 | 114844826 |
| chr6 | 114850841 | 114850956 |
| chr6 | 114851351 | 114851636 |
| chr6 | 114862941 | 114863076 |
| chr6 | 114865891 | 114866236 |
| chr6 | 114866761 | 114866986 |
| chr6 | 114867441 | 114867576 |
| chr6 | 114868551 | 114868736 |
| chr6 | 114868911 | 114869316 |
| chr6 | 114881341 | 114881476 |
| chr6 | 115189361 | 115189816 |
| chr6 | 115190161 | 115190406 |
| chr6 | 115207531 | 115207786 |
| chr6 | 115292031 | 115292246 |
| chr6 | 115292351 | 115292596 |
| chr6 | 115306761 | 115306896 |

|      |           |           |
|------|-----------|-----------|
| chr6 | 115311641 | 115312506 |
| chr6 | 115314981 | 115315346 |
| chr6 | 115317781 | 115317896 |
| chr6 | 115332881 | 115333086 |
| chr6 | 115409281 | 115409486 |
| chr6 | 115467821 | 115467956 |
| chr6 | 115469151 | 115469556 |
| chr6 | 115472911 | 115473036 |
| chr6 | 115473301 | 115473866 |
| chr6 | 115473911 | 115474246 |
| chr6 | 115484691 | 115484896 |
| chr6 | 115557401 | 115557646 |
| chr6 | 115836241 | 115836376 |
| chr6 | 115841121 | 115841476 |
| chr6 | 115851531 | 115851776 |
| chr6 | 115885671 | 115885956 |
| chr6 | 115891721 | 115891836 |
| chr6 | 115907031 | 115907266 |
| chr6 | 115909031 | 115909206 |
| chr6 | 115909741 | 115910386 |
| chr6 | 115913111 | 115913356 |
| chr6 | 115917621 | 115918336 |
| chr6 | 115921771 | 115922036 |
| chr6 | 115926721 | 115927206 |
| chr6 | 115928001 | 115928286 |
| chr6 | 115932961 | 115933176 |
| chr6 | 115943031 | 115943176 |
| chr6 | 115944141 | 115944436 |
| chr6 | 116351731 | 116351866 |
| chr6 | 117011161 | 117011336 |
| chr6 | 117269491 | 117269666 |
| chr6 | 117383901 | 117384146 |
| chr6 | 117602761 | 117602966 |
| chr6 | 117621211 | 117621376 |
| chr6 | 119148951 | 119149116 |
| chr6 | 119337461 | 119337656 |
| chr6 | 119358161 | 119358376 |
| chr6 | 119364221 | 119364516 |
| chr6 | 119368971 | 119369156 |
| chr6 | 119381341 | 119381546 |
| chr6 | 119396491 | 119396776 |
| chr6 | 119435991 | 119436326 |
| chr6 | 119515561 | 119515716 |
| chr6 | 119515881 | 119516026 |
| chr6 | 119535461 | 119535706 |
| chr6 | 119782901 | 119783056 |
| chr6 | 120099061 | 120099316 |
| chr6 | 120100031 | 120100276 |
| chr6 | 120137631 | 120137956 |
| chr6 | 120138231 | 120138406 |
| chr6 | 120404661 | 120404926 |
| chr6 | 120542691 | 120543086 |
| chr6 | 120617651 | 120617806 |

|      |           |           |
|------|-----------|-----------|
| chr6 | 120749831 | 120750106 |
| chr6 | 120756641 | 120756886 |
| chr6 | 120771681 | 120771846 |
| chr6 | 120806551 | 120806786 |
| chr6 | 120807271 | 120807526 |
| chr6 | 120815841 | 120815936 |
| chr6 | 120860131 | 120860606 |
| chr6 | 120861111 | 120861296 |
| chr6 | 120861401 | 120861606 |
| chr6 | 120861661 | 120862016 |
| chr6 | 120928241 | 120928466 |
| chr6 | 120928991 | 120929126 |
| chr6 | 120937761 | 120938136 |
| chr6 | 120981561 | 120981716 |
| chr6 | 120984131 | 120984366 |
| chr6 | 120993781 | 120994016 |
| chr6 | 120999111 | 120999376 |
| chr6 | 121003901 | 121004026 |
| chr6 | 121020521 | 121020786 |
| chr6 | 121031461 | 121031696 |
| chr6 | 121031901 | 121032116 |
| chr6 | 121053691 | 121053866 |
| chr6 | 121055901 | 121056016 |
| chr6 | 121068101 | 121068366 |
| chr6 | 121092931 | 121093196 |
| chr6 | 121093451 | 121093626 |
| chr6 | 121093911 | 121094036 |
| chr6 | 121095011 | 121095266 |
| chr6 | 121102281 | 121102416 |
| chr6 | 121120821 | 121121236 |
| chr6 | 121121261 | 121121546 |
| chr6 | 121125381 | 121125586 |
| chr6 | 122774431 | 122774896 |
| chr6 | 123187151 | 123187286 |
| chr6 | 124358081 | 124358446 |
| chr6 | 124358911 | 124359146 |
| chr6 | 124366671 | 124366806 |
| chr6 | 124391931 | 124392106 |
| chr6 | 124399161 | 124399376 |
| chr6 | 124443621 | 124443826 |
| chr6 | 124542631 | 124542826 |
| chr6 | 124615351 | 124615506 |
| chr6 | 124621191 | 124621456 |
| chr6 | 124626641 | 124627066 |
| chr6 | 124627071 | 124627216 |
| chr6 | 124643681 | 124644166 |
| chr6 | 124644171 | 124644646 |
| chr6 | 124644771 | 124645136 |
| chr6 | 124647441 | 124647596 |
| chr6 | 124651241 | 124651406 |
| chr6 | 124655221 | 124655346 |
| chr6 | 124658101 | 124658356 |
| chr6 | 124664291 | 124664516 |



|      |           |           |
|------|-----------|-----------|
| chr6 | 124674601 | 124674736 |
| chr6 | 124689781 | 124689926 |
| chr6 | 124720171 | 124720346 |
| chr6 | 124761581 | 124761696 |
| chr6 | 124762391 | 124762616 |
| chr6 | 124804581 | 124804826 |
| chr6 | 124863851 | 124864056 |
| chr6 | 124864371 | 124864656 |
| chr6 | 124864761 | 124865276 |
| chr6 | 124884081 | 124884326 |
| chr6 | 124961701 | 124961906 |
| chr6 | 125009441 | 125009786 |
| chr6 | 125036381 | 125036496 |
| chr6 | 125110591 | 125111136 |
| chr6 | 125117171 | 125117326 |
| chr6 | 125117571 | 125117886 |
| chr6 | 125123011 | 125123286 |
| chr6 | 125123531 | 125123946 |
| chr6 | 125124001 | 125124406 |
| chr6 | 125207791 | 125208146 |
| chr6 | 125252131 | 125253256 |
| chr6 | 125253281 | 125253506 |
| chr6 | 125262771 | 125262936 |
| chr6 | 125294151 | 125294456 |
| chr6 | 125302161 | 125302436 |
| chr6 | 125328351 | 125328646 |
| chr6 | 125439881 | 125440266 |
| chr6 | 126901171 | 126901316 |
| chr6 | 127082761 | 127082886 |
| chr6 | 127093101 | 127093896 |
| chr6 | 127285561 | 127285676 |
| chr6 | 127287811 | 127288046 |
| chr6 | 127490681 | 127490846 |
| chr6 | 127819281 | 127819566 |
| chr6 | 127930831 | 127931056 |
| chr6 | 127936421 | 127936636 |
| chr6 | 127936931 | 127937116 |
| chr6 | 128029651 | 128029876 |
| chr6 | 128054451 | 128054616 |
| chr6 | 128058011 | 128058136 |
| chr6 | 128058151 | 128058326 |
| chr6 | 128066661 | 128067416 |
| chr6 | 128071661 | 128071986 |
| chr6 | 128074311 | 128074826 |
| chr6 | 128078701 | 128078816 |
| chr6 | 128186381 | 128186496 |
| chr6 | 128225611 | 128225866 |
| chr6 | 128226111 | 128226736 |
| chr6 | 128247151 | 128247396 |
| chr6 | 128288911 | 128289026 |
| chr6 | 129489591 | 129489786 |
| chr6 | 131332891 | 131333016 |
| chr6 | 133989231 | 133989396 |

|      |           |           |
|------|-----------|-----------|
| chr6 | 134025711 | 134025856 |
| chr6 | 134083731 | 134083986 |
| chr6 | 134121281 | 134121496 |
| chr6 | 134121841 | 134121926 |
| chr6 | 134122391 | 134122636 |
| chr6 | 134136151 | 134136336 |
| chr6 | 134148721 | 134149036 |
| chr6 | 134157071 | 134158566 |
| chr6 | 134172441 | 134172716 |
| chr6 | 134327431 | 134327556 |
| chr6 | 134398491 | 134398796 |
| chr6 | 134506021 | 134506196 |
| chr6 | 134658301 | 134658456 |
| chr6 | 135216531 | 135216716 |
| chr6 | 135245631 | 135245886 |
| chr6 | 135318251 | 135318366 |
| chr6 | 135318701 | 135318956 |
| chr6 | 135338461 | 135338596 |
| chr6 | 136494161 | 136494346 |
| chr6 | 136499201 | 136499436 |
| chr6 | 136627401 | 136627626 |
| chr6 | 136769091 | 136769246 |
| chr6 | 136817301 | 136817546 |
| chr6 | 136842861 | 136843346 |
| chr6 | 136843801 | 136843956 |
| chr6 | 136865191 | 136865326 |
| chr6 | 137051491 | 137051606 |
| chr6 | 137058891 | 137059046 |
| chr6 | 137083911 | 137084036 |
| chr6 | 137106731 | 137106926 |
| chr6 | 137164741 | 137164856 |
| chr6 | 137405841 | 137406166 |
| chr6 | 137419551 | 137419726 |
| chr6 | 137446231 | 137446476 |
| chr6 | 137470761 | 137470896 |
| chr6 | 137497711 | 137497826 |
| chr6 | 137522511 | 137522676 |
| chr6 | 137527591 | 137527766 |
| chr6 | 137693291 | 137693486 |
| chr6 | 137721491 | 137721666 |
| chr6 | 137785461 | 137785726 |
| chr6 | 138091131 | 138091286 |
| chr6 | 140511321 | 140511456 |
| chr6 | 140518671 | 140519076 |
| chr6 | 140541491 | 140541616 |
| chr6 | 140541921 | 140542196 |
| chr6 | 140542381 | 140542536 |
| chr6 | 140609681 | 140609986 |
| chr6 | 141353201 | 141353426 |
| chr6 | 142341901 | 142342076 |
| chr6 | 142421301 | 142421556 |
| chr6 | 142455481 | 142455776 |
| chr6 | 142487141 | 142487496 |

|      |           |           |
|------|-----------|-----------|
| chr6 | 143039621 | 143039866 |
| chr6 | 143120501 | 143120816 |
| chr6 | 143141621 | 143141886 |
| chr6 | 143563861 | 143564386 |
| chr6 | 143583111 | 143583316 |
| chr6 | 144005451 | 144005596 |
| chr6 | 144005861 | 144006006 |
| chr6 | 144132371 | 144132486 |
| chr6 | 144151771 | 144151936 |
| chr6 | 144221671 | 144221996 |
| chr6 | 144458771 | 144458896 |
| chr6 | 144607651 | 144607766 |
| chr6 | 144640661 | 144640786 |
| chr6 | 144699051 | 144699226 |
| chr6 | 144702001 | 144702366 |
| chr6 | 144774721 | 144774936 |
| chr6 | 144858221 | 144858366 |
| chr6 | 144935771 | 144935956 |
| chr6 | 144950471 | 144950736 |
| chr6 | 145122481 | 145122966 |
| chr6 | 145353061 | 145353256 |
| chr6 | 145384401 | 145384546 |
| chr6 | 145395621 | 145395876 |
| chr6 | 145448171 | 145448396 |
| chr6 | 145516041 | 145516286 |
| chr6 | 145590311 | 145590716 |
| chr6 | 145649471 | 145649706 |
| chr6 | 145713691 | 145713946 |
| chr6 | 145738521 | 145738766 |
| chr6 | 145752761 | 145752936 |
| chr6 | 145806221 | 145806416 |
| chr6 | 145807131 | 145807386 |
| chr6 | 145917541 | 145917656 |
| chr6 | 145934201 | 145934326 |
| chr6 | 145946931 | 145947276 |
| chr6 | 146119001 | 146119486 |
| chr6 | 146249041 | 146249156 |
| chr6 | 146262311 | 146262776 |
| chr6 | 146262871 | 146263116 |
| chr6 | 146265071 | 146265306 |
| chr6 | 146279291 | 146279516 |
| chr6 | 146327801 | 146328056 |
| chr6 | 146332071 | 146332206 |
| chr6 | 146421921 | 146422036 |
| chr6 | 146847101 | 146847276 |
| chr6 | 146958781 | 146959006 |
| chr6 | 146959411 | 146959616 |
| chr6 | 147013471 | 147013726 |
| chr6 | 147339201 | 147339416 |
| chr6 | 147456451 | 147456596 |
| chr6 | 147829821 | 147829936 |
| chr6 | 149204071 | 149204196 |
| chr5 | 3186811   | 3187046   |

|      |          |          |
|------|----------|----------|
| chr5 | 3198761  | 3198956  |
| chr5 | 3377471  | 3377626  |
| chr5 | 3380741  | 3381096  |
| chr5 | 3382291  | 3382576  |
| chr5 | 3387241  | 3387366  |
| chr5 | 3433501  | 3433636  |
| chr5 | 3472871  | 3473226  |
| chr5 | 3473581  | 3473786  |
| chr5 | 3507251  | 3507416  |
| chr5 | 3598941  | 3599196  |
| chr5 | 3643561  | 3643716  |
| chr5 | 3935331  | 3935566  |
| chr5 | 4022361  | 4022606  |
| chr5 | 4322801  | 4322926  |
| chr5 | 4496321  | 4496436  |
| chr5 | 4591271  | 4591426  |
| chr5 | 4755511  | 4755756  |
| chr5 | 4834871  | 4834986  |
| chr5 | 5291481  | 5291656  |
| chr5 | 5365271  | 5365536  |
| chr5 | 9099981  | 9100146  |
| chr5 | 9100901  | 9101026  |
| chr5 | 13475761 | 13475876 |
| chr5 | 14185381 | 14185496 |
| chr5 | 15347651 | 15347796 |
| chr5 | 19969551 | 19969686 |
| chr5 | 20266411 | 20266606 |
| chr5 | 20297991 | 20298116 |
| chr5 | 20984631 | 20984776 |
| chr5 | 21189401 | 21189656 |
| chr5 | 21992691 | 21992896 |
| chr5 | 22046841 | 22047046 |
| chr5 | 22912241 | 22912516 |
| chr5 | 22919931 | 22920076 |
| chr5 | 22966861 | 22967046 |
| chr5 | 23007211 | 23007396 |
| chr5 | 23141221 | 23141496 |
| chr5 | 23177911 | 23178136 |
| chr5 | 23473401 | 23473606 |
| chr5 | 23949851 | 23950026 |
| chr5 | 23951601 | 23951766 |
| chr5 | 24229641 | 24229806 |
| chr5 | 24231291 | 24231466 |
| chr5 | 24263671 | 24263786 |
| chr5 | 24340351 | 24340546 |
| chr5 | 24340771 | 24340956 |
| chr5 | 24349751 | 24349996 |
| chr5 | 24501361 | 24501496 |
| chr5 | 24501501 | 24501616 |
| chr5 | 24506351 | 24506466 |
| chr5 | 24592311 | 24592516 |
| chr5 | 24605281 | 24605536 |
| chr5 | 24607201 | 24607376 |

|      |          |          |
|------|----------|----------|
| chr5 | 24955811 | 24955956 |
| chr5 | 25119661 | 25119796 |
| chr5 | 25228241 | 25228376 |
| chr5 | 28116551 | 28116756 |
| chr5 | 28358741 | 28358856 |
| chr5 | 28400241 | 28400386 |
| chr5 | 30299561 | 30299826 |
| chr5 | 30454831 | 30455086 |
| chr5 | 30463871 | 30464046 |
| chr5 | 30661381 | 30661556 |
| chr5 | 30822541 | 30822916 |
| chr5 | 30840151 | 30840326 |
| chr5 | 30880071 | 30880206 |
| chr5 | 30889851 | 30890026 |
| chr5 | 30891031 | 30891396 |
| chr5 | 30891441 | 30891706 |
| chr5 | 30892531 | 30892756 |
| chr5 | 30907241 | 30907386 |
| chr5 | 30907891 | 30908016 |
| chr5 | 30908751 | 30908926 |
| chr5 | 30917671 | 30917996 |
| chr5 | 30927711 | 30927966 |
| chr5 | 30928901 | 30929016 |
| chr5 | 31210951 | 31211176 |
| chr5 | 31222451 | 31222576 |
| chr5 | 31468761 | 31468956 |
| chr5 | 31556771 | 31557356 |
| chr5 | 32018091 | 32018226 |
| chr5 | 32381121 | 32381366 |
| chr5 | 32448761 | 32448936 |
| chr5 | 33081691 | 33082046 |
| chr5 | 33561661 | 33561866 |
| chr5 | 33562821 | 33563076 |
| chr5 | 33563481 | 33563706 |
| chr5 | 34343551 | 34343846 |
| chr5 | 34508591 | 34508726 |
| chr5 | 34788871 | 34789066 |
| chr5 | 34855861 | 34856046 |
| chr5 | 35266061 | 35266196 |
| chr5 | 35293381 | 35293506 |
| chr5 | 35376981 | 35377106 |
| chr5 | 35443261 | 35443436 |
| chr5 | 35445761 | 35446046 |
| chr5 | 35951961 | 35952376 |
| chr5 | 36032991 | 36033206 |
| chr5 | 36226451 | 36226656 |
| chr5 | 36239631 | 36239836 |
| chr5 | 36240591 | 36240756 |
| chr5 | 36243231 | 36243506 |
| chr5 | 36243671 | 36243926 |
| chr5 | 36261311 | 36261426 |
| chr5 | 36285701 | 36286106 |
| chr5 | 36298101 | 36298316 |

|      |          |          |
|------|----------|----------|
| chr5 | 36299231 | 36299386 |
| chr5 | 36306351 | 36306666 |
| chr5 | 36316531 | 36316656 |
| chr5 | 36463591 | 36463776 |
| chr5 | 36887301 | 36887426 |
| chr5 | 36968451 | 36968666 |
| chr5 | 37108751 | 37108986 |
| chr5 | 38872531 | 38872696 |
| chr5 | 38873231 | 38873356 |
| chr5 | 39074871 | 39075076 |
| chr5 | 43678941 | 43679196 |
| chr5 | 43741971 | 43742156 |
| chr5 | 44567651 | 44567786 |
| chr5 | 44569541 | 44569766 |
| chr5 | 44614541 | 44614656 |
| chr5 | 44614821 | 44615076 |
| chr5 | 45832571 | 45832736 |
| chr5 | 45886541 | 45886686 |
| chr5 | 48186451 | 48186626 |
| chr5 | 50398681 | 50398916 |
| chr5 | 51863971 | 51864096 |
| chr5 | 52259811 | 52259986 |
| chr5 | 53434351 | 53434616 |
| chr5 | 53843231 | 53843486 |
| chr5 | 53855181 | 53855376 |
| chr5 | 53915571 | 53915766 |
| chr5 | 53916371 | 53916486 |
| chr5 | 54320671 | 54320896 |
| chr5 | 54339031 | 54339186 |
| chr5 | 54385391 | 54385526 |
| chr5 | 57481771 | 57481926 |
| chr5 | 64299021 | 64299286 |
| chr5 | 64675151 | 64675266 |
| chr5 | 64681191 | 64681306 |
| chr5 | 64683881 | 64684146 |
| chr5 | 64689811 | 64689946 |
| chr5 | 64693511 | 64693676 |
| chr5 | 64736451 | 64736586 |
| chr5 | 64757111 | 64757366 |
| chr5 | 64770091 | 64770216 |
| chr5 | 64972991 | 64973176 |
| chr5 | 64990391 | 64990576 |
| chr5 | 65017641 | 65017846 |
| chr5 | 65194191 | 65194636 |
| chr5 | 65200031 | 65200146 |
| chr5 | 65200601 | 65200976 |
| chr5 | 65253251 | 65253486 |
| chr5 | 65429671 | 65430006 |
| chr5 | 65494111 | 65494226 |
| chr5 | 65541871 | 65542036 |
| chr5 | 65671101 | 65671226 |
| chr5 | 65679401 | 65679516 |
| chr5 | 65748041 | 65748286 |

|      |          |          |
|------|----------|----------|
| chr5 | 65759301 | 65759406 |
| chr5 | 65767451 | 65767606 |
| chr5 | 65793851 | 65793986 |
| chr5 | 65880021 | 65880276 |
| chr5 | 65899821 | 65900126 |
| chr5 | 65901781 | 65901906 |
| chr5 | 66067001 | 66067136 |
| chr5 | 66350751 | 66350946 |
| chr5 | 66444211 | 66444336 |
| chr5 | 66444521 | 66444826 |
| chr5 | 66467781 | 66468156 |
| chr5 | 66468231 | 66468656 |
| chr5 | 66468731 | 66469016 |
| chr5 | 66469031 | 66469226 |
| chr5 | 66470831 | 66470956 |
| chr5 | 66471931 | 66472076 |
| chr5 | 66472901 | 66473016 |
| chr5 | 66473611 | 66473896 |
| chr5 | 66474971 | 66475186 |
| chr5 | 66490271 | 66490466 |
| chr5 | 66513781 | 66514016 |
| chr5 | 66516741 | 66516906 |
| chr5 | 66534831 | 66535196 |
| chr5 | 66547681 | 66547876 |
| chr5 | 66558121 | 66558346 |
| chr5 | 66614291 | 66614546 |
| chr5 | 66664861 | 66665256 |
| chr5 | 66714871 | 66714996 |
| chr5 | 66747111 | 66747236 |
| chr5 | 66865661 | 66865856 |
| chr5 | 66889021 | 66889176 |
| chr5 | 66964131 | 66964476 |
| chr5 | 67402201 | 67402436 |
| chr5 | 67649581 | 67649736 |
| chr5 | 72611091 | 72611216 |
| chr5 | 73098831 | 73098956 |
| chr5 | 73243151 | 73243266 |
| chr5 | 73304141 | 73304516 |
| chr5 | 73541651 | 73541866 |
| chr5 | 73548191 | 73548506 |
| chr5 | 73571731 | 73571976 |
| chr5 | 73624761 | 73625006 |
| chr5 | 73633421 | 73633556 |
| chr5 | 73760251 | 73760536 |
| chr5 | 73924731 | 73924916 |
| chr5 | 74120861 | 74121326 |
| chr5 | 74282881 | 74283046 |
| chr5 | 74384431 | 74384606 |
| chr5 | 74435761 | 74436006 |
| chr5 | 74436261 | 74436446 |
| chr5 | 74457471 | 74457716 |
| chr5 | 74462521 | 74462816 |
| chr5 | 74559871 | 74560036 |

|      |          |          |
|------|----------|----------|
| chr5 | 74585251 | 74585446 |
| chr5 | 74590221 | 74590586 |
| chr5 | 74591921 | 74592236 |
| chr5 | 74606771 | 74607006 |
| chr5 | 74619021 | 74619166 |
| chr5 | 74619301 | 74619476 |
| chr5 | 74652541 | 74652696 |
| chr5 | 74726471 | 74726666 |
| chr5 | 74733261 | 74733416 |
| chr5 | 74851801 | 74851996 |
| chr5 | 75017851 | 75018036 |
| chr5 | 75207341 | 75207476 |
| chr5 | 75352121 | 75352656 |
| chr5 | 75370261 | 75370606 |
| chr5 | 75442411 | 75442636 |
| chr5 | 76714611 | 76714946 |
| chr5 | 76847491 | 76847646 |
| chr5 | 76869481 | 76869606 |
| chr5 | 77352581 | 77352686 |
| chr5 | 77405451 | 77405636 |
| chr5 | 77502261 | 77502626 |
| chr5 | 77528781 | 77529026 |
| chr5 | 77544131 | 77544406 |
| chr5 | 77551381 | 77551566 |
| chr5 | 77572141 | 77572276 |
| chr5 | 77583861 | 77584016 |
| chr5 | 77584611 | 77584926 |
| chr5 | 77780851 | 77780966 |
| chr5 | 77798611 | 77798806 |
| chr5 | 77829911 | 77830216 |
| chr5 | 77832661 | 77832856 |
| chr5 | 81450241 | 81450376 |
| chr5 | 81506341 | 81506426 |
| chr5 | 81652061 | 81652216 |
| chr5 | 81920771 | 81920946 |
| chr5 | 89023361 | 89023566 |
| chr5 | 89105751 | 89105976 |
| chr5 | 89250691 | 89250916 |
| chr5 | 89358741 | 89359146 |
| chr5 | 89360721 | 89360946 |
| chr5 | 90255791 | 90255906 |
| chr5 | 90711971 | 90712356 |
| chr5 | 91006731 | 91006966 |
| chr5 | 91076861 | 91077116 |
| chr5 | 91166531 | 91166656 |
| chr5 | 91234491 | 91234696 |
| chr5 | 91251211 | 91251426 |
| chr5 | 91989901 | 91990056 |
| chr5 | 92066831 | 92067016 |
| chr5 | 92096771 | 92097006 |
| chr5 | 92482411 | 92482736 |
| chr5 | 92514031 | 92514356 |
| chr5 | 92527161 | 92527356 |



|      |           |           |
|------|-----------|-----------|
| chr5 | 92527711  | 92527886  |
| chr5 | 92546711  | 92547066  |
| chr5 | 92549451  | 92549626  |
| chr5 | 92568651  | 92568906  |
| chr5 | 92568931  | 92569246  |
| chr5 | 92608551  | 92608736  |
| chr5 | 92635311  | 92635436  |
| chr5 | 92700701  | 92700976  |
| chr5 | 92705821  | 92706426  |
| chr5 | 92706761  | 92706896  |
| chr5 | 92747651  | 92747906  |
| chr5 | 92760901  | 92761426  |
| chr5 | 92813511  | 92813656  |
| chr5 | 92898341  | 92898476  |
| chr5 | 92922481  | 92922896  |
| chr5 | 92923551  | 92923786  |
| chr5 | 93527011  | 93527266  |
| chr5 | 93550801  | 93551086  |
| chr5 | 93574951  | 93575206  |
| chr5 | 93576161  | 93576356  |
| chr5 | 93583681  | 93583846  |
| chr5 | 93711551  | 93712356  |
| chr5 | 93715251  | 93715436  |
| chr5 | 97212411  | 97212656  |
| chr5 | 97346831  | 97347126  |
| chr5 | 97367931  | 97368186  |
| chr5 | 97425491  | 97425596  |
| chr5 | 97425931  | 97426116  |
| chr5 | 97433881  | 97434016  |
| chr5 | 97506771  | 97506906  |
| chr5 | 99207941  | 99208066  |
| chr5 | 99426211  | 99426376  |
| chr5 | 99680901  | 99681066  |
| chr5 | 99691601  | 99691766  |
| chr5 | 99701221  | 99701396  |
| chr5 | 99768621  | 99768826  |
| chr5 | 99775841  | 99775966  |
| chr5 | 99816001  | 99816236  |
| chr5 | 99831581  | 99831786  |
| chr5 | 100402491 | 100402706 |
| chr5 | 100483241 | 100483426 |
| chr5 | 100538151 | 100538296 |
| chr5 | 100796881 | 100797036 |
| chr5 | 100797381 | 100797636 |
| chr5 | 100852681 | 100852926 |
| chr5 | 100895601 | 100895856 |
| chr5 | 101072681 | 101072966 |
| chr5 | 101093191 | 101093546 |
| chr5 | 101276071 | 101276236 |
| chr5 | 101277161 | 101277386 |
| chr5 | 101279221 | 101279426 |
| chr5 | 101284031 | 101284176 |
| chr5 | 101292841 | 101293296 |

|      |           |           |
|------|-----------|-----------|
| chr5 | 101301111 | 101301366 |
| chr5 | 101325291 | 101325566 |
| chr5 | 101338081 | 101338256 |
| chr5 | 101345681 | 101345816 |
| chr5 | 102255741 | 102255966 |
| chr5 | 102321961 | 102322076 |
| chr5 | 102351461 | 102351666 |
| chr5 | 102475801 | 102475976 |
| chr5 | 102481721 | 102481806 |
| chr5 | 102492491 | 102492666 |
| chr5 | 102492871 | 102493086 |
| chr5 | 103786101 | 103786356 |
| chr5 | 103816911 | 103817046 |
| chr5 | 103892941 | 103893296 |
| chr5 | 103928691 | 103928876 |
| chr5 | 103956151 | 103956406 |
| chr5 | 104039781 | 104040026 |
| chr5 | 104166211 | 104166606 |
| chr5 | 104167081 | 104167206 |
| chr5 | 104189401 | 104189596 |
| chr5 | 104197711 | 104197836 |
| chr5 | 104217671 | 104217956 |
| chr5 | 104218691 | 104218856 |
| chr5 | 104226781 | 104227006 |
| chr5 | 104236141 | 104236616 |
| chr5 | 104236821 | 104236936 |
| chr5 | 104267681 | 104267936 |
| chr5 | 104277531 | 104277726 |
| chr5 | 104356891 | 104357356 |
| chr5 | 104454651 | 104454766 |
| chr5 | 104539401 | 104539516 |
| chr5 | 104558051 | 104558266 |
| chr5 | 104589551 | 104589896 |
| chr5 | 104665911 | 104666136 |
| chr5 | 104894781 | 104895006 |
| chr5 | 105847221 | 105847536 |
| chr5 | 105847891 | 105848046 |
| chr5 | 105857431 | 105857726 |
| chr5 | 105858351 | 105858466 |
| chr5 | 106128301 | 106128566 |
| chr5 | 106130081 | 106130396 |
| chr5 | 106130431 | 106131056 |
| chr5 | 106131871 | 106132256 |
| chr5 | 106132361 | 106132546 |
| chr5 | 106132661 | 106133206 |
| chr5 | 106133561 | 106133916 |
| chr5 | 106151941 | 106152306 |
| chr5 | 106160111 | 106160506 |
| chr5 | 106161711 | 106161986 |
| chr5 | 106172381 | 106172616 |
| chr5 | 106216991 | 106217166 |
| chr5 | 106265301 | 106265446 |
| chr5 | 106276741 | 106276966 |

|      |           |           |
|------|-----------|-----------|
| chr5 | 106296551 | 106296676 |
| chr5 | 106296941 | 106297186 |
| chr5 | 106353431 | 106353556 |
| chr5 | 107018171 | 107019026 |
| chr5 | 107029241 | 107029376 |
| chr5 | 107403421 | 107403676 |
| chr5 | 107464371 | 107464606 |
| chr5 | 107465741 | 107465996 |
| chr5 | 107522601 | 107522876 |
| chr5 | 107545891 | 107545976 |
| chr5 | 107546221 | 107546436 |
| chr5 | 107550251 | 107550586 |
| chr5 | 107552771 | 107552926 |
| chr5 | 107577421 | 107577566 |
| chr5 | 107577581 | 107577706 |
| chr5 | 107593571 | 107593686 |
| chr5 | 107593921 | 107594056 |
| chr5 | 107624111 | 107624296 |
| chr5 | 107624461 | 107624686 |
| chr5 | 107624761 | 107625096 |
| chr5 | 107632311 | 107632446 |
| chr5 | 107637051 | 107637186 |
| chr5 | 107651931 | 107652056 |
| chr5 | 107662491 | 107662706 |
| chr5 | 107663071 | 107663516 |
| chr5 | 107689741 | 107690056 |
| chr5 | 107705281 | 107705596 |
| chr5 | 107712261 | 107712396 |
| chr5 | 107712601 | 107712826 |
| chr5 | 107713331 | 107713616 |
| chr5 | 108171671 | 108171856 |
| chr5 | 108697171 | 108697296 |
| chr5 | 109141181 | 109141296 |
| chr5 | 110632201 | 110632476 |
| chr5 | 110779321 | 110779586 |
| chr5 | 110842141 | 110842396 |
| chr5 | 110866441 | 110866666 |
| chr5 | 110895591 | 110895826 |
| chr5 | 110926691 | 110927206 |
| chr5 | 111006111 | 111006326 |
| chr5 | 111059131 | 111059426 |
| chr5 | 111059601 | 111059716 |
| chr5 | 111263521 | 111263636 |
| chr5 | 111440061 | 111440206 |
| chr5 | 111451711 | 111451886 |
| chr5 | 111479231 | 111479476 |
| chr5 | 111495761 | 111495976 |
| chr5 | 111608621 | 111608866 |
| chr5 | 111620911 | 111621136 |
| chr5 | 111621251 | 111621386 |
| chr5 | 111716471 | 111716696 |
| chr5 | 111716851 | 111717536 |
| chr5 | 111822241 | 111822666 |

|      |           |           |
|------|-----------|-----------|
| chr5 | 111831121 | 111831446 |
| chr5 | 111831561 | 111831816 |
| chr5 | 111871171 | 111871346 |
| chr5 | 111935621 | 111935856 |
| chr5 | 112075941 | 112076146 |
| chr5 | 112091071 | 112091196 |
| chr5 | 112154221 | 112154516 |
| chr5 | 112221771 | 112221876 |
| chr5 | 112221891 | 112222006 |
| chr5 | 112233521 | 112233706 |
| chr5 | 112360481 | 112360606 |
| chr5 | 112683921 | 112684116 |
| chr5 | 112684781 | 112684936 |
| chr5 | 112707871 | 112708126 |
| chr5 | 112710191 | 112710456 |
| chr5 | 112718741 | 112718886 |
| chr5 | 112719691 | 112719856 |
| chr5 | 112721451 | 112721846 |
| chr5 | 112722301 | 112722486 |
| chr5 | 112806961 | 112807386 |
| chr5 | 112812031 | 112812176 |
| chr5 | 113829561 | 113829666 |
| chr5 | 114094361 | 114094616 |
| chr5 | 114094821 | 114094996 |
| chr5 | 114122891 | 114123006 |
| chr5 | 114176101 | 114176216 |
| chr5 | 114301881 | 114302126 |
| chr5 | 114304271 | 114304626 |
| chr5 | 114307121 | 114307366 |
| chr5 | 114307371 | 114307686 |
| chr5 | 114319211 | 114319346 |
| chr5 | 114320481 | 114320616 |
| chr5 | 114337551 | 114337736 |
| chr5 | 114414701 | 114414946 |
| chr5 | 114436171 | 114436376 |
| chr5 | 114582411 | 114582536 |
| chr5 | 114583931 | 114584176 |
| chr5 | 114589221 | 114589356 |
| chr5 | 114593601 | 114593856 |
| chr5 | 114596001 | 114596376 |
| chr5 | 114596401 | 114596756 |
| chr5 | 114603431 | 114603686 |
| chr5 | 114604361 | 114604616 |
| chr5 | 114606331 | 114606466 |
| chr5 | 114885501 | 114885766 |
| chr5 | 115057651 | 115057766 |
| chr5 | 115130651 | 115130956 |
| chr5 | 115136921 | 115137516 |
| chr5 | 115139401 | 115139596 |
| chr5 | 115172771 | 115173396 |
| chr5 | 115187151 | 115187416 |
| chr5 | 115187521 | 115187876 |
| chr5 | 115188821 | 115189306 |

|      |           |           |
|------|-----------|-----------|
| chr5 | 115234611 | 115234996 |
| chr5 | 115243481 | 115243796 |
| chr5 | 115465681 | 115465796 |
| chr5 | 115466851 | 115467056 |
| chr5 | 115502801 | 115503026 |
| chr5 | 115549781 | 115549986 |
| chr5 | 115550211 | 115550406 |
| chr5 | 115671271 | 115671656 |
| chr5 | 115716401 | 115716656 |
| chr5 | 115717521 | 115717756 |
| chr5 | 115718441 | 115718566 |
| chr5 | 115730761 | 115730916 |
| chr5 | 115959271 | 115959646 |
| chr5 | 115961791 | 115962176 |
| chr5 | 115962331 | 115962606 |
| chr5 | 115965011 | 115965266 |
| chr5 | 115984011 | 115984156 |
| chr5 | 115993041 | 115993166 |
| chr5 | 115993291 | 115993456 |
| chr5 | 115997191 | 115997506 |
| chr5 | 116029561 | 116029696 |
| chr5 | 116030161 | 116030396 |
| chr5 | 116030551 | 116030776 |
| chr5 | 116034751 | 116035116 |
| chr5 | 116083411 | 116083796 |
| chr5 | 116453241 | 116453506 |
| chr5 | 116827771 | 116827966 |
| chr5 | 116857361 | 116857486 |
| chr5 | 117559151 | 117559296 |
| chr5 | 117584561 | 117584716 |
| chr5 | 117603671 | 117603826 |
| chr5 | 117604111 | 117604266 |
| chr5 | 117616981 | 117617256 |
| chr5 | 117632051 | 117632276 |
| chr5 | 117656981 | 117657186 |
| chr5 | 117657231 | 117657566 |
| chr5 | 118213011 | 118213176 |
| chr5 | 118416881 | 118417226 |
| chr5 | 118430851 | 118431046 |
| chr5 | 118437961 | 118438096 |
| chr5 | 118465651 | 118465816 |
| chr5 | 118536551 | 118536986 |
| chr5 | 118537821 | 118537946 |
| chr5 | 118538281 | 118538426 |
| chr5 | 118539451 | 118539656 |
| chr5 | 118539771 | 118540316 |
| chr5 | 118546011 | 118546426 |
| chr5 | 118589801 | 118590096 |
| chr5 | 118593391 | 118593516 |
| chr5 | 118593801 | 118593906 |
| chr5 | 118594241 | 118594556 |
| chr5 | 118603351 | 118603526 |
| chr5 | 118724621 | 118724856 |

|      |           |           |
|------|-----------|-----------|
| chr5 | 118740401 | 118740926 |
| chr5 | 118786021 | 118786276 |
| chr5 | 118798061 | 118798186 |
| chr5 | 118827431 | 118827656 |
| chr5 | 118838461 | 118838596 |
| chr5 | 118875351 | 118875596 |
| chr5 | 118925931 | 118926166 |
| chr5 | 118944761 | 118945236 |
| chr5 | 118954201 | 118954326 |
| chr5 | 118984801 | 118984916 |
| chr5 | 119020151 | 119020536 |
| chr5 | 119021751 | 119021896 |
| chr5 | 119025531 | 119025676 |
| chr5 | 119041101 | 119041236 |
| chr5 | 119044561 | 119044876 |
| chr5 | 119046361 | 119046546 |
| chr5 | 119046831 | 119047106 |
| chr5 | 119056261 | 119056456 |
| chr5 | 119056691 | 119057026 |
| chr5 | 119059741 | 119060016 |
| chr5 | 119060631 | 119060846 |
| chr5 | 119083651 | 119083786 |
| chr5 | 119085261 | 119085756 |
| chr5 | 119093671 | 119093856 |
| chr5 | 119096931 | 119097186 |
| chr5 | 119129441 | 119129556 |
| chr5 | 119139701 | 119139896 |
| chr5 | 119160061 | 119160346 |
| chr5 | 119169891 | 119170006 |
| chr5 | 120630251 | 120630386 |
| chr5 | 120940911 | 120941166 |
| chr5 | 120963541 | 120964576 |
| chr5 | 120984301 | 120984506 |
| chr5 | 121000211 | 121000366 |
| chr5 | 121016381 | 121016546 |
| chr5 | 121017071 | 121017466 |
| chr5 | 121018181 | 121018596 |
| chr5 | 121018981 | 121019096 |
| chr5 | 121029281 | 121029666 |
| chr5 | 121029761 | 121030016 |
| chr5 | 121030211 | 121030336 |
| chr5 | 121590231 | 121590506 |
| chr5 | 121637791 | 121638116 |
| chr5 | 121666391 | 121666516 |
| chr5 | 121676361 | 121676606 |
| chr5 | 121816411 | 121816756 |
| chr5 | 121817821 | 121818006 |
| chr5 | 121828551 | 121828846 |
| chr5 | 121834001 | 121834116 |
| chr5 | 121834321 | 121834486 |
| chr5 | 121837281 | 121837536 |
| chr5 | 121882221 | 121882476 |
| chr5 | 121888011 | 121888126 |

|      |           |           |
|------|-----------|-----------|
| chr5 | 122036631 | 122036756 |
| chr5 | 122042151 | 122042796 |
| chr5 | 122117511 | 122117676 |
| chr5 | 122165051 | 122165266 |
| chr5 | 122216131 | 122216376 |
| chr5 | 122219531 | 122219786 |
| chr5 | 122219941 | 122220206 |
| chr5 | 122305151 | 122305236 |
| chr5 | 122360941 | 122361096 |
| chr5 | 122741891 | 122742106 |
| chr5 | 122745531 | 122745706 |
| chr5 | 122752651 | 122752836 |
| chr5 | 122762911 | 122763336 |
| chr5 | 122765081 | 122765726 |
| chr5 | 122775121 | 122775346 |
| chr5 | 122873191 | 122873446 |
| chr5 | 122905061 | 122905186 |
| chr5 | 122946801 | 122946996 |
| chr5 | 122959641 | 122959956 |
| chr5 | 122968381 | 122968736 |
| chr5 | 122976291 | 122976586 |
| chr5 | 122976691 | 122976846 |
| chr5 | 122976991 | 122977836 |
| chr5 | 122988091 | 122988476 |
| chr5 | 123185791 | 123185916 |
| chr5 | 123210901 | 123211246 |
| chr5 | 123238371 | 123238916 |
| chr5 | 123250001 | 123250356 |
| chr5 | 123252701 | 123252856 |
| chr5 | 123411051 | 123411396 |
| chr5 | 123469511 | 123469736 |
| chr5 | 123476591 | 123476716 |
| chr5 | 123527921 | 123528216 |
| chr5 | 123530151 | 123530456 |
| chr5 | 123536821 | 123537076 |
| chr5 | 123537251 | 123537386 |
| chr5 | 123541041 | 123541176 |
| chr5 | 123544261 | 123544416 |
| chr5 | 123546011 | 123546126 |
| chr5 | 123546731 | 123546816 |
| chr5 | 123551591 | 123552046 |
| chr5 | 123560191 | 123560636 |
| chr5 | 123561011 | 123561286 |
| chr5 | 123608201 | 123608366 |
| chr5 | 123613231 | 123613376 |
| chr5 | 123631621 | 123631996 |
| chr5 | 123689591 | 123689846 |
| chr5 | 123847001 | 123847176 |
| chr5 | 123862181 | 123862466 |
| chr5 | 123866581 | 123867006 |
| chr5 | 123881921 | 123882116 |
| chr5 | 124120881 | 124121316 |
| chr5 | 124121521 | 124121646 |

|      |           |           |
|------|-----------|-----------|
| chr5 | 124294361 | 124294616 |
| chr5 | 124298231 | 124298376 |
| chr5 | 124309001 | 124309286 |
| chr5 | 124326011 | 124326236 |
| chr5 | 124327921 | 124328176 |
| chr5 | 124328181 | 124328346 |
| chr5 | 124329071 | 124329466 |
| chr5 | 124329591 | 124330446 |
| chr5 | 124429571 | 124429796 |
| chr5 | 124431311 | 124431556 |
| chr5 | 124464161 | 124464296 |
| chr5 | 124464711 | 124464966 |
| chr5 | 124469261 | 124469656 |
| chr5 | 124471091 | 124471396 |
| chr5 | 124477991 | 124478296 |
| chr5 | 124479451 | 124480146 |
| chr5 | 124623491 | 124623626 |
| chr5 | 124639251 | 124639426 |
| chr5 | 124647191 | 124647436 |
| chr5 | 124648961 | 124649136 |
| chr5 | 124656131 | 124656366 |
| chr5 | 124656961 | 124657366 |
| chr5 | 124660861 | 124661036 |
| chr5 | 124661391 | 124661586 |
| chr5 | 124663471 | 124663586 |
| chr5 | 124668721 | 124668846 |
| chr5 | 124672151 | 124672396 |
| chr5 | 124677261 | 124677516 |
| chr5 | 124799241 | 124799456 |
| chr5 | 124894541 | 124894776 |
| chr5 | 124897211 | 124897526 |
| chr5 | 124901531 | 124901676 |
| chr5 | 124903391 | 124903506 |
| chr5 | 124918291 | 124918516 |
| chr5 | 124940791 | 124940946 |
| chr5 | 125087351 | 125087896 |
| chr5 | 125421941 | 125422066 |
| chr5 | 125532881 | 125533246 |
| chr5 | 125533311 | 125533636 |
| chr5 | 125561251 | 125561566 |
| chr5 | 125586531 | 125586786 |
| chr5 | 125594311 | 125594616 |
| chr5 | 125620551 | 125620826 |
| chr5 | 125629511 | 125629756 |
| chr5 | 125636901 | 125637496 |
| chr5 | 125639061 | 125639226 |
| chr5 | 125639901 | 125640026 |
| chr5 | 125648451 | 125648706 |
| chr5 | 125650211 | 125650336 |
| chr5 | 125650991 | 125651206 |
| chr5 | 125651691 | 125651946 |
| chr5 | 125655731 | 125655866 |
| chr5 | 125722241 | 125722446 |



|      |           |           |
|------|-----------|-----------|
| chr5 | 125755001 | 125755136 |
| chr5 | 125767551 | 125767746 |
| chr5 | 125773191 | 125773696 |
| chr5 | 125784961 | 125785106 |
| chr5 | 125787221 | 125787396 |
| chr5 | 125789341 | 125789826 |
| chr5 | 125798441 | 125798586 |
| chr5 | 125806481 | 125806736 |
| chr5 | 125806781 | 125807036 |
| chr5 | 125818001 | 125818236 |
| chr5 | 125821801 | 125822306 |
| chr5 | 125844261 | 125844416 |
| chr5 | 125932771 | 125933026 |
| chr5 | 125933301 | 125933446 |
| chr5 | 125942831 | 125942946 |
| chr5 | 125947821 | 125947946 |
| chr5 | 125958401 | 125958616 |
| chr5 | 125961121 | 125961366 |
| chr5 | 125961491 | 125961606 |
| chr5 | 125971501 | 125971756 |
| chr5 | 125975131 | 125976126 |
| chr5 | 125976151 | 125976386 |
| chr5 | 126001281 | 126001546 |
| chr5 | 128095361 | 128095696 |
| chr5 | 129493511 | 129493826 |
| chr5 | 129508201 | 129508436 |
| chr5 | 129511421 | 129511536 |
| chr5 | 129521511 | 129521716 |
| chr5 | 129814711 | 129814886 |
| chr5 | 129835161 | 129835296 |
| chr5 | 130051801 | 130052146 |
| chr5 | 130236231 | 130236366 |
| chr5 | 130276311 | 130276496 |
| chr5 | 130297891 | 130298106 |
| chr5 | 130430051 | 130430266 |
| chr5 | 130507881 | 130508176 |
| chr5 | 130520391 | 130520776 |
| chr5 | 130521891 | 130522086 |
| chr5 | 130524951 | 130525206 |
| chr5 | 130723991 | 130724226 |
| chr5 | 132786021 | 132786136 |
| chr5 | 132830901 | 132831056 |
| chr5 | 133302671 | 133302786 |
| chr5 | 134490801 | 134490996 |
| chr5 | 134708011 | 134708346 |
| chr5 | 134708621 | 134708756 |
| chr5 | 134709011 | 134709336 |
| chr5 | 134711031 | 134711166 |
| chr5 | 134749581 | 134749746 |
| chr5 | 134751251 | 134751536 |
| chr5 | 134765641 | 134765806 |
| chr5 | 134765871 | 134766126 |
| chr5 | 134771031 | 134771336 |

|      |           |           |
|------|-----------|-----------|
| chr5 | 134894181 | 134894426 |
| chr5 | 134896581 | 134896796 |
| chr5 | 134897101 | 134897236 |
| chr5 | 134909131 | 134909356 |
| chr5 | 134911761 | 134912016 |
| chr5 | 134912081 | 134912256 |
| chr5 | 134913451 | 134913726 |
| chr5 | 134930151 | 134930876 |
| chr5 | 134931101 | 134931336 |
| chr5 | 134932201 | 134932356 |
| chr5 | 135012071 | 135012296 |
| chr5 | 135153091 | 135153266 |
| chr5 | 135153701 | 135153956 |
| chr5 | 135157191 | 135157446 |
| chr5 | 135350391 | 135350546 |
| chr5 | 135433771 | 135434006 |
| chr5 | 135465531 | 135465706 |
| chr5 | 135497981 | 135498186 |
| chr5 | 135583691 | 135583876 |
| chr5 | 135584051 | 135584246 |
| chr5 | 135635301 | 135635416 |
| chr5 | 135638841 | 135638956 |
| chr5 | 135734211 | 135734616 |
| chr5 | 135822431 | 135822576 |
| chr5 | 135844181 | 135844446 |
| chr5 | 135851631 | 135851786 |
| chr5 | 135865411 | 135865566 |
| chr5 | 135936541 | 135936796 |
| chr5 | 135944151 | 135944316 |
| chr5 | 135968871 | 135969096 |
| chr5 | 135973621 | 135973906 |
| chr5 | 136118691 | 136118876 |
| chr5 | 136133501 | 136133586 |
| chr5 | 136136461 | 136136676 |
| chr5 | 136150841 | 136151116 |
| chr5 | 136167291 | 136167506 |
| chr5 | 136169551 | 136169716 |
| chr5 | 136196891 | 136197026 |
| chr5 | 136201501 | 136201716 |
| chr5 | 136206581 | 136206836 |
| chr5 | 136207091 | 136207326 |
| chr5 | 136207491 | 136207876 |
| chr5 | 136208161 | 136208386 |
| chr5 | 136208421 | 136208626 |
| chr5 | 136209181 | 136209616 |
| chr5 | 136209721 | 136210086 |
| chr5 | 136210261 | 136210586 |
| chr5 | 136211431 | 136211836 |
| chr5 | 136211971 | 136212086 |
| chr5 | 136213971 | 136214166 |
| chr5 | 136217641 | 136217776 |
| chr5 | 136218111 | 136218616 |
| chr5 | 136256321 | 136256606 |

|      |           |           |
|------|-----------|-----------|
| chr5 | 136257091 | 136257216 |
| chr5 | 136383241 | 136383526 |
| chr5 | 136383941 | 136384046 |
| chr5 | 136385021 | 136385506 |
| chr5 | 136385551 | 136386346 |
| chr5 | 136389901 | 136390016 |
| chr5 | 136391071 | 136391186 |
| chr5 | 136391491 | 136391836 |
| chr5 | 136392941 | 136393366 |
| chr5 | 136394001 | 136394236 |
| chr5 | 136399801 | 136400196 |
| chr5 | 136402761 | 136402936 |
| chr5 | 136411221 | 136411436 |
| chr5 | 136427091 | 136427226 |
| chr5 | 136432941 | 136433086 |
| chr5 | 136489661 | 136489846 |
| chr5 | 136490711 | 136491176 |
| chr5 | 136492081 | 136492266 |
| chr5 | 136493131 | 136493216 |
| chr5 | 136521201 | 136521346 |
| chr5 | 136530531 | 136530786 |
| chr5 | 136616101 | 136616546 |
| chr5 | 136616571 | 136616686 |
| chr5 | 136657681 | 136657846 |
| chr5 | 136688601 | 136688946 |
| chr5 | 136690221 | 136690396 |
| chr5 | 136693281 | 136693716 |
| chr5 | 136694181 | 136694356 |
| chr5 | 136694891 | 136695016 |
| chr5 | 136700261 | 136700476 |
| chr5 | 136700581 | 136700736 |
| chr5 | 136704961 | 136705086 |
| chr5 | 136707951 | 136708226 |
| chr5 | 136709041 | 136709376 |
| chr5 | 136710151 | 136710326 |
| chr5 | 136712541 | 136712666 |
| chr5 | 136718581 | 136718876 |
| chr5 | 136719301 | 136719466 |
| chr5 | 136788481 | 136788826 |
| chr5 | 137032401 | 137032656 |
| chr5 | 137436631 | 137436906 |
| chr5 | 137441611 | 137441836 |
| chr5 | 137442021 | 137442176 |
| chr5 | 137442341 | 137442716 |
| chr5 | 137443711 | 137443846 |
| chr5 | 137444761 | 137445016 |
| chr5 | 137455551 | 137455806 |
| chr5 | 137463891 | 137464076 |
| chr5 | 137464371 | 137464516 |
| chr5 | 137549101 | 137549356 |
| chr5 | 137553361 | 137553556 |
| chr5 | 137642231 | 137642366 |
| chr5 | 137818731 | 137818906 |

|      |           |           |
|------|-----------|-----------|
| chr5 | 137841511 | 137841716 |
| chr5 | 137848181 | 137848316 |
| chr5 | 138110331 | 138110646 |
| chr5 | 138160481 | 138160626 |
| chr5 | 138197121 | 138197236 |
| chr5 | 138237711 | 138237876 |
| chr5 | 138698261 | 138698386 |
| chr5 | 139232451 | 139232806 |
| chr5 | 139251601 | 139251786 |
| chr5 | 139259531 | 139259856 |
| chr5 | 139323371 | 139323526 |
| chr5 | 139464731 | 139465176 |
| chr5 | 139623061 | 139623276 |
| chr5 | 139623381 | 139623516 |
| chr5 | 139809511 | 139809636 |
| chr5 | 139810151 | 139810236 |
| chr5 | 139847051 | 139847206 |
| chr5 | 139856921 | 139857176 |
| chr5 | 139860501 | 139860686 |
| chr5 | 139883361 | 139883486 |
| chr5 | 139884341 | 139884466 |
| chr5 | 139899231 | 139899506 |
| chr5 | 140214291 | 140214466 |
| chr5 | 140272061 | 140272356 |
| chr5 | 140567441 | 140567846 |
| chr5 | 140568041 | 140568156 |
| chr5 | 140682971 | 140683086 |
| chr5 | 140683311 | 140683566 |
| chr5 | 140684721 | 140684916 |
| chr5 | 140685131 | 140685386 |
| chr5 | 140758071 | 140758696 |
| chr5 | 140767011 | 140767266 |
| chr5 | 140982561 | 140982876 |
| chr5 | 140983121 | 140983416 |
| chr5 | 140983811 | 140983966 |
| chr5 | 140984411 | 140984646 |
| chr5 | 140985421 | 140985576 |
| chr5 | 140985911 | 140987226 |
| chr5 | 141047391 | 141047656 |
| chr5 | 141049291 | 141049546 |
| chr5 | 141083221 | 141083526 |
| chr5 | 141087861 | 141088186 |
| chr5 | 141092771 | 141093176 |
| chr5 | 141099511 | 141099686 |
| chr5 | 141102211 | 141102306 |
| chr5 | 142908381 | 142908696 |
| chr5 | 143559281 | 143559456 |
| chr5 | 143736411 | 143736596 |
| chr5 | 144028291 | 144028416 |
| chr5 | 144039221 | 144039356 |
| chr5 | 144231861 | 144231996 |
| chr5 | 144254231 | 144254366 |
| chr5 | 144271361 | 144271496 |

|      |           |           |
|------|-----------|-----------|
| chr5 | 144284431 | 144284546 |
| chr5 | 144284681 | 144284826 |
| chr5 | 144286071 | 144286436 |
| chr5 | 144415531 | 144415676 |
| chr5 | 144663221 | 144663406 |
| chr5 | 144793591 | 144793746 |
| chr5 | 144894151 | 144894336 |
| chr5 | 144954261 | 144954506 |
| chr5 | 145044121 | 145044326 |
| chr5 | 145044551 | 145044776 |
| chr5 | 145078861 | 145079106 |
| chr5 | 145557941 | 145558346 |
| chr5 | 145561121 | 145561326 |
| chr5 | 145633221 | 145633386 |
| chr5 | 145665691 | 145665986 |
| chr5 | 145667451 | 145667726 |
| chr5 | 145676771 | 145677146 |
| chr5 | 145677301 | 145677486 |
| chr5 | 145696691 | 145696896 |
| chr5 | 145703411 | 145703586 |
| chr5 | 145706581 | 145706726 |
| chr5 | 145715201 | 145715516 |
| chr5 | 145720961 | 145721216 |
| chr5 | 145881781 | 145882076 |
| chr5 | 145882101 | 145882456 |
| chr5 | 146711401 | 146711536 |
| chr5 | 147034841 | 147034986 |
| chr5 | 147052901 | 147053016 |
| chr5 | 147072651 | 147072776 |
| chr5 | 147524751 | 147524916 |
| chr5 | 147581891 | 147582106 |
| chr5 | 147588721 | 147588926 |
| chr5 | 147593301 | 147593446 |
| chr5 | 147604751 | 147604916 |
| chr5 | 147646901 | 147647036 |
| chr5 | 147652881 | 147653176 |
| chr5 | 147673241 | 147673436 |
| chr5 | 147782581 | 147782796 |
| chr5 | 147793081 | 147793226 |
| chr5 | 147854121 | 147854556 |
| chr5 | 147861681 | 147861876 |
| chr5 | 147862311 | 147862516 |
| chr5 | 147862691 | 147862976 |
| chr5 | 147863251 | 147863406 |
| chr5 | 147870031 | 147870306 |
| chr5 | 147870331 | 147870586 |
| chr5 | 147870831 | 147871166 |
| chr5 | 147902121 | 147902436 |
| chr5 | 147905021 | 147905206 |
| chr5 | 147906041 | 147906166 |
| chr5 | 148247901 | 148248046 |
| chr5 | 148538771 | 148538916 |
| chr5 | 148554191 | 148554416 |

|      |           |           |
|------|-----------|-----------|
| chr5 | 148601191 | 148601306 |
| chr5 | 148648821 | 148648946 |
| chr5 | 148686301 | 148686606 |
| chr5 | 149143781 | 149144036 |
| chr5 | 149160471 | 149160616 |
| chr5 | 149160711 | 149161006 |
| chr5 | 149175331 | 149175676 |
| chr5 | 149178641 | 149178876 |
| chr5 | 149189721 | 149189836 |
| chr5 | 149230731 | 149230956 |
| chr5 | 149446781 | 149446896 |
| chr5 | 149694591 | 149694836 |
| chr5 | 149721181 | 149721396 |
| chr5 | 149764871 | 149765276 |
| chr5 | 149765971 | 149766216 |
| chr5 | 149766301 | 149766796 |
| chr5 | 149802591 | 149802936 |
| chr5 | 149970611 | 149970826 |
| chr5 | 150015031 | 150015296 |
| chr5 | 150125731 | 150125846 |
| chr5 | 151324771 | 151324906 |
| chr5 | 151381091 | 151381276 |
| chr5 | 151396321 | 151396596 |
| chr5 | 151402221 | 151402466 |
| chr5 | 151780051 | 151780186 |
| chr5 | 151898611 | 151898876 |
| chr5 | 151937721 | 151937976 |
| chr5 | 152034511 | 152034646 |
| chr5 | 152102411 | 152102706 |
| chr4 | 4076141   | 4076296   |
| chr4 | 6149391   | 6149796   |
| chr4 | 6301121   | 6301376   |
| chr4 | 10932771  | 10932886  |
| chr4 | 11382511  | 11382786  |
| chr4 | 13513811  | 13514016  |
| chr4 | 22285721  | 22285916  |
| chr4 | 24936551  | 24936686  |
| chr4 | 32607801  | 32608156  |
| chr4 | 32623911  | 32624146  |
| chr4 | 32657881  | 32658026  |
| chr4 | 33135951  | 33136126  |
| chr4 | 33144941  | 33145076  |
| chr4 | 33332981  | 33333216  |
| chr4 | 33352181  | 33352486  |
| chr4 | 34600631  | 34600746  |
| chr4 | 35046991  | 35047136  |
| chr4 | 40121671  | 40121856  |
| chr4 | 40127101  | 40127346  |
| chr4 | 40128421  | 40128926  |
| chr4 | 40152611  | 40152866  |
| chr4 | 40647181  | 40647376  |
| chr4 | 40767321  | 40767566  |
| chr4 | 40775911  | 40776136  |

|      |          |          |
|------|----------|----------|
| chr4 | 40778691 | 40778866 |
| chr4 | 40855501 | 40855646 |
| chr4 | 40994611 | 40994966 |
| chr4 | 41018801 | 41019026 |
| chr4 | 41022131 | 41022276 |
| chr4 | 41132361 | 41132506 |
| chr4 | 41427981 | 41428236 |
| chr4 | 41428271 | 41428526 |
| chr4 | 41442971 | 41443096 |
| chr4 | 41658821 | 41659056 |
| chr4 | 43015941 | 43016156 |
| chr4 | 43396261 | 43396426 |
| chr4 | 43428641 | 43428816 |
| chr4 | 43431741 | 43432186 |
| chr4 | 43432871 | 43432956 |
| chr4 | 43436661 | 43436886 |
| chr4 | 43460071 | 43460326 |
| chr4 | 43691851 | 43692526 |
| chr4 | 43706521 | 43706686 |
| chr4 | 43708531 | 43708716 |
| chr4 | 43716791 | 43716926 |
| chr4 | 43742921 | 43743236 |
| chr4 | 44027421 | 44027536 |
| chr4 | 44032611 | 44032726 |
| chr4 | 44032731 | 44032846 |
| chr4 | 44042611 | 44042806 |
| chr4 | 44992401 | 44992606 |
| chr4 | 45495171 | 45495326 |
| chr4 | 45498101 | 45498216 |
| chr4 | 45519611 | 45519876 |
| chr4 | 45536271 | 45536526 |
| chr4 | 46099711 | 46099936 |
| chr4 | 46100541 | 46100786 |
| chr4 | 46153031 | 46153206 |
| chr4 | 46383271 | 46383476 |
| chr4 | 46576711 | 46576876 |
| chr4 | 46577701 | 46577946 |
| chr4 | 46645551 | 46645766 |
| chr4 | 47061121 | 47061246 |
| chr4 | 47141661 | 47141876 |
| chr4 | 47152071 | 47152326 |
| chr4 | 47249481 | 47249696 |
| chr4 | 47249841 | 47250166 |
| chr4 | 47250171 | 47250486 |
| chr4 | 47264431 | 47264886 |
| chr4 | 47265041 | 47265176 |
| chr4 | 48090091 | 48090266 |
| chr4 | 48428941 | 48429196 |
| chr4 | 48564831 | 48565006 |
| chr4 | 48572691 | 48573196 |
| chr4 | 49572071 | 49572186 |
| chr4 | 53133391 | 53133636 |
| chr4 | 53163341 | 53163636 |

|      |          |          |
|------|----------|----------|
| chr4 | 53166161 | 53166306 |
| chr4 | 53211961 | 53212186 |
| chr4 | 53276761 | 53276916 |
| chr4 | 53464651 | 53464796 |
| chr4 | 53488081 | 53488266 |
| chr4 | 53609751 | 53609976 |
| chr4 | 53771291 | 53771446 |
| chr4 | 54770961 | 54771376 |
| chr4 | 54970281 | 54970456 |
| chr4 | 54985721 | 54985976 |
| chr4 | 55078551 | 55078686 |
| chr4 | 55546601 | 55546846 |
| chr4 | 55576071 | 55576416 |
| chr4 | 55724371 | 55724646 |
| chr4 | 55802881 | 55803116 |
| chr4 | 56362251 | 56362496 |
| chr4 | 56901431 | 56901686 |
| chr4 | 56950061 | 56950226 |
| chr4 | 56974471 | 56974696 |
| chr4 | 57253021 | 57253276 |
| chr4 | 57527171 | 57527426 |
| chr4 | 57581881 | 57582056 |
| chr4 | 57582421 | 57582806 |
| chr4 | 57584641 | 57584786 |
| chr4 | 57598601 | 57598726 |
| chr4 | 57612781 | 57613006 |
| chr4 | 57613441 | 57613846 |
| chr4 | 57697801 | 57698056 |
| chr4 | 57802461 | 57802616 |
| chr4 | 57834721 | 57834976 |
| chr4 | 57929351 | 57929606 |
| chr4 | 58161541 | 58161706 |
| chr4 | 58190051 | 58190696 |
| chr4 | 58383621 | 58383836 |
| chr4 | 58386731 | 58386856 |
| chr4 | 58683431 | 58683666 |
| chr4 | 58749831 | 58749956 |
| chr4 | 58923211 | 58923466 |
| chr4 | 59022911 | 59023066 |
| chr4 | 59760211 | 59760336 |
| chr4 | 61950471 | 61950656 |
| chr4 | 62157001 | 62157246 |
| chr4 | 62171111 | 62171356 |
| chr4 | 62179501 | 62179656 |
| chr4 | 62274321 | 62274496 |
| chr4 | 62275071 | 62275306 |
| chr4 | 62330911 | 62331026 |
| chr4 | 62404501 | 62404756 |
| chr4 | 62875771 | 62875886 |
| chr4 | 63060261 | 63060466 |
| chr4 | 63206611 | 63206736 |
| chr4 | 63704461 | 63704706 |
| chr4 | 64940261 | 64940446 |



|      |          |          |
|------|----------|----------|
| chr4 | 64971751 | 64971896 |
| chr4 | 64979241 | 64979726 |
| chr4 | 68260991 | 68261116 |
| chr4 | 70063611 | 70063766 |
| chr4 | 71766101 | 71766246 |
| chr4 | 71858481 | 71859096 |
| chr4 | 80959411 | 80959636 |
| chr4 | 81211351 | 81211576 |
| chr4 | 82030131 | 82030436 |
| chr4 | 82050391 | 82050576 |
| chr4 | 82064241 | 82064496 |
| chr4 | 82080141 | 82080366 |
| chr4 | 82103331 | 82103466 |
| chr4 | 82153481 | 82153636 |
| chr4 | 82154271 | 82154586 |
| chr4 | 82219061 | 82219356 |
| chr4 | 82530761 | 82530926 |
| chr4 | 82537051 | 82537416 |
| chr4 | 82880531 | 82880656 |
| chr4 | 82962411 | 82962686 |
| chr4 | 82989381 | 82989536 |
| chr4 | 83755971 | 83756106 |
| chr4 | 83832411 | 83832526 |
| chr4 | 83978501 | 83978726 |
| chr4 | 84148571 | 84148716 |
| chr4 | 84273811 | 84273936 |
| chr4 | 84529701 | 84529976 |
| chr4 | 86312721 | 86312886 |
| chr4 | 87469201 | 87469446 |
| chr4 | 88183101 | 88183376 |
| chr4 | 88526231 | 88526446 |
| chr4 | 88773461 | 88773586 |
| chr4 | 88786501 | 88786736 |
| chr4 | 88921881 | 88922016 |
| chr4 | 93553441 | 93553586 |
| chr4 | 94820701 | 94820876 |
| chr4 | 94945471 | 94945676 |
| chr4 | 94945911 | 94946046 |
| chr4 | 95528681 | 95528866 |
| chr4 | 97456781 | 97456956 |
| chr4 | 97503581 | 97503956 |
| chr4 | 97535571 | 97535716 |
| chr4 | 97538821 | 97538956 |
| chr4 | 97577511 | 97577846 |
| chr4 | 97578161 | 97578386 |
| chr4 | 97657171 | 97657596 |
| chr4 | 97771191 | 97771346 |
| chr4 | 97771461 | 97771696 |
| chr4 | 97772831 | 97772966 |
| chr4 | 97775471 | 97775656 |
| chr4 | 97988611 | 97988946 |
| chr4 | 98001031 | 98001286 |
| chr4 | 98167631 | 98167766 |

|      |           |           |
|------|-----------|-----------|
| chr4 | 98230351  | 98230476  |
| chr4 | 98233521  | 98233826  |
| chr4 | 98234201  | 98234466  |
| chr4 | 99072191  | 99072486  |
| chr4 | 99612841  | 99612976  |
| chr4 | 99615671  | 99615916  |
| chr4 | 99629161  | 99629386  |
| chr4 | 99642081  | 99642226  |
| chr4 | 99646941  | 99647206  |
| chr4 | 101025401 | 101025536 |
| chr4 | 102250101 | 102250556 |
| chr4 | 102785211 | 102785356 |
| chr4 | 104871521 | 104871806 |
| chr4 | 104877201 | 104877376 |
| chr4 | 104877961 | 104878156 |
| chr4 | 104881901 | 104882186 |
| chr4 | 104888511 | 104888666 |
| chr4 | 104960161 | 104960306 |
| chr4 | 104980131 | 104980266 |
| chr4 | 105004901 | 105005046 |
| chr4 | 105227621 | 105227796 |
| chr4 | 105229921 | 105230226 |
| chr4 | 105516481 | 105516646 |
| chr4 | 105858291 | 105858786 |
| chr4 | 105951751 | 105951946 |
| chr4 | 106575111 | 106575356 |
| chr4 | 106581651 | 106581796 |
| chr4 | 106586761 | 106586896 |
| chr4 | 106586931 | 106587186 |
| chr4 | 106594561 | 106595536 |
| chr4 | 106693681 | 106693836 |
| chr4 | 106896381 | 106896586 |
| chr4 | 106919871 | 106920126 |
| chr4 | 107060231 | 107060456 |
| chr4 | 107064231 | 107064496 |
| chr4 | 107065841 | 107066036 |
| chr4 | 107066131 | 107066376 |
| chr4 | 107098281 | 107098566 |
| chr4 | 107098581 | 107098906 |
| chr4 | 107124671 | 107124936 |
| chr4 | 107168151 | 107168266 |
| chr4 | 107208011 | 107208146 |
| chr4 | 107208151 | 107208266 |
| chr4 | 107211461 | 107211606 |
| chr4 | 107249531 | 107249646 |
| chr4 | 107281831 | 107282136 |
| chr4 | 107612911 | 107613086 |
| chr4 | 107668401 | 107668626 |
| chr4 | 107688021 | 107688376 |
| chr4 | 107688581 | 107688896 |
| chr4 | 107697411 | 107697596 |
| chr4 | 107705271 | 107705446 |
| chr4 | 107709611 | 107709856 |

|      |           |           |
|------|-----------|-----------|
| chr4 | 107718791 | 107719036 |
| chr4 | 107724341 | 107724456 |
| chr4 | 107731571 | 107731826 |
| chr4 | 107732141 | 107732396 |
| chr4 | 108120501 | 108120706 |
| chr4 | 108775271 | 108775486 |
| chr4 | 108829491 | 108829736 |
| chr4 | 108911061 | 108911176 |
| chr4 | 109245861 | 109245986 |
| chr4 | 109246851 | 109247016 |
| chr4 | 109247281 | 109247896 |
| chr4 | 109313041 | 109313186 |
| chr4 | 114081021 | 114081316 |
| chr4 | 114081341 | 114081646 |
| chr4 | 114231591 | 114231796 |
| chr4 | 114285821 | 114285956 |
| chr4 | 115849841 | 115850096 |
| chr4 | 116885311 | 116885426 |
| chr4 | 117239111 | 117239246 |
| chr4 | 117243481 | 117243716 |
| chr4 | 117280891 | 117281116 |
| chr4 | 117324411 | 117324576 |
| chr4 | 117520021 | 117520236 |
| chr4 | 117705071 | 117705306 |
| chr4 | 117816491 | 117816746 |
| chr4 | 117821661 | 117821916 |
| chr4 | 117944411 | 117944666 |
| chr4 | 118062921 | 118063156 |
| chr4 | 118067071 | 118067396 |
| chr4 | 118220841 | 118221066 |
| chr4 | 118917631 | 118917876 |
| chr4 | 118917891 | 118917986 |
| chr4 | 119639491 | 119639706 |
| chr4 | 119653721 | 119653946 |
| chr4 | 119744461 | 119744686 |
| chr4 | 119762191 | 119762306 |
| chr4 | 119867051 | 119867236 |
| chr4 | 119962631 | 119962886 |
| chr4 | 119963021 | 119963416 |
| chr4 | 120238301 | 120238516 |
| chr4 | 122678961 | 122679126 |
| chr4 | 122721961 | 122722106 |
| chr4 | 123132561 | 123132816 |
| chr4 | 123367411 | 123367676 |
| chr4 | 124228971 | 124229086 |
| chr4 | 124387471 | 124387666 |
| chr4 | 124429761 | 124430006 |
| chr4 | 124485581 | 124485796 |
| chr4 | 124494801 | 124495006 |
| chr4 | 124662621 | 124662796 |
| chr4 | 124693781 | 124693996 |
| chr4 | 124793801 | 124793956 |
| chr4 | 124795201 | 124795356 |

|      |           |           |
|------|-----------|-----------|
| chr4 | 124797251 | 124797516 |
| chr4 | 124801321 | 124801456 |
| chr4 | 125187641 | 125187776 |
| chr4 | 125783271 | 125783626 |
| chr4 | 125792811 | 125793086 |
| chr4 | 125798831 | 125799166 |
| chr4 | 125858481 | 125858646 |
| chr4 | 126018771 | 126018906 |
| chr4 | 126929031 | 126929366 |
| chr4 | 127014991 | 127015236 |
| chr4 | 127244771 | 127244916 |
| chr4 | 128386671 | 128386926 |
| chr4 | 128389551 | 128389686 |
| chr4 | 128627341 | 128627596 |
| chr4 | 128644861 | 128645056 |
| chr4 | 128672471 | 128672816 |
| chr4 | 128672921 | 128673156 |
| chr4 | 128673561 | 128674086 |
| chr4 | 128674661 | 128674916 |
| chr4 | 128675031 | 128675216 |
| chr4 | 128689591 | 128689836 |
| chr4 | 128699081 | 128699196 |
| chr4 | 128803131 | 128803386 |
| chr4 | 128814791 | 128814926 |
| chr4 | 128818401 | 128818556 |
| chr4 | 128819261 | 128819386 |
| chr4 | 129319811 | 129319976 |
| chr4 | 129357141 | 129357376 |
| chr4 | 129602131 | 129602326 |
| chr4 | 129619271 | 129619636 |
| chr4 | 129845421 | 129845596 |
| chr4 | 129884011 | 129884196 |
| chr4 | 130396961 | 130397076 |
| chr4 | 131894851 | 131894976 |
| chr4 | 131895681 | 131895826 |
| chr4 | 132028411 | 132028606 |
| chr4 | 132103401 | 132103796 |
| chr4 | 132517051 | 132517356 |
| chr4 | 132576611 | 132576786 |
| chr4 | 132582041 | 132582196 |
| chr4 | 132584911 | 132585086 |
| chr4 | 132602691 | 132602966 |
| chr4 | 132605351 | 132605516 |
| chr4 | 132614671 | 132614796 |
| chr4 | 132716861 | 132717016 |
| chr4 | 132782161 | 132782486 |
| chr4 | 132809421 | 132809606 |
| chr4 | 132937101 | 132937426 |
| chr4 | 132944891 | 132945156 |
| chr4 | 132959871 | 132960016 |
| chr4 | 133186991 | 133187116 |
| chr4 | 133957651 | 133957836 |
| chr4 | 134103151 | 134103566 |

|      |           |           |
|------|-----------|-----------|
| chr4 | 134103911 | 134104156 |
| chr4 | 134207401 | 134207566 |
| chr4 | 134289531 | 134289646 |
| chr4 | 134292201 | 134292376 |
| chr4 | 134315821 | 134316046 |
| chr4 | 134335011 | 134335206 |
| chr4 | 134353571 | 134353706 |
| chr4 | 134360151 | 134360396 |
| chr4 | 134361381 | 134361586 |
| chr4 | 134791541 | 134791826 |
| chr4 | 134800841 | 134801546 |
| chr4 | 134821061 | 134821316 |
| chr4 | 134822711 | 134823026 |
| chr4 | 134825301 | 134825506 |
| chr4 | 134838751 | 134838916 |
| chr4 | 134863221 | 134863616 |
| chr4 | 134878901 | 134879036 |
| chr4 | 134889431 | 134889686 |
| chr4 | 134894471 | 134894806 |
| chr4 | 135397951 | 135398156 |
| chr4 | 135399151 | 135399326 |
| chr4 | 135513761 | 135514176 |
| chr4 | 135514201 | 135514426 |
| chr4 | 135523151 | 135523446 |
| chr4 | 135650681 | 135650836 |
| chr4 | 135681951 | 135682206 |
| chr4 | 135691491 | 135691636 |
| chr4 | 135731971 | 135732136 |
| chr4 | 135732301 | 135732416 |
| chr4 | 135733291 | 135733566 |
| chr4 | 135734131 | 135734286 |
| chr4 | 135933621 | 135933756 |
| chr4 | 136024981 | 136025126 |
| chr4 | 136272691 | 136272826 |
| chr4 | 136332591 | 136332806 |
| chr4 | 136337971 | 136338306 |
| chr4 | 136381101 | 136381446 |
| chr4 | 136385101 | 136385386 |
| chr4 | 136570571 | 136570786 |
| chr4 | 136684101 | 136684326 |
| chr4 | 136742501 | 136742716 |
| chr4 | 136860411 | 136860616 |
| chr4 | 136950141 | 136950266 |
| chr4 | 137005571 | 137006026 |
| chr4 | 137037401 | 137037516 |
| chr4 | 137040591 | 137040986 |
| chr4 | 137042081 | 137042376 |
| chr4 | 137048611 | 137048806 |
| chr4 | 137300251 | 137300466 |
| chr4 | 137411541 | 137411756 |
| chr4 | 137458001 | 137458286 |
| chr4 | 137482991 | 137483176 |
| chr4 | 137499401 | 137499526 |

|      |           |           |
|------|-----------|-----------|
| chr4 | 137564671 | 137564836 |
| chr4 | 138435801 | 138435956 |
| chr4 | 138656621 | 138656746 |
| chr4 | 138809281 | 138809466 |
| chr4 | 138837551 | 138837806 |
| chr4 | 138837891 | 138838076 |
| chr4 | 138839091 | 138839186 |
| chr4 | 138845091 | 138845206 |
| chr4 | 138855421 | 138855646 |
| chr4 | 138863931 | 138864136 |
| chr4 | 139033541 | 139033676 |
| chr4 | 139134651 | 139135006 |
| chr4 | 139140561 | 139140736 |
| chr4 | 139143871 | 139144116 |
| chr4 | 139179711 | 139179896 |
| chr4 | 139187421 | 139187526 |
| chr4 | 139195791 | 139196046 |
| chr4 | 139814901 | 139815066 |
| chr4 | 140213841 | 140214356 |
| chr4 | 140527801 | 140527976 |
| chr4 | 140589811 | 140589966 |
| chr4 | 140670341 | 140670596 |
| chr4 | 140674321 | 140674456 |
| chr4 | 140686741 | 140686926 |
| chr4 | 140690181 | 140690426 |
| chr4 | 140690591 | 140690966 |
| chr4 | 140827961 | 140828096 |
| chr4 | 141014401 | 141014486 |
| chr4 | 141066981 | 141067146 |
| chr4 | 141070291 | 141070416 |
| chr4 | 141070511 | 141070786 |
| chr4 | 141157091 | 141157326 |
| chr4 | 141220341 | 141220926 |
| chr4 | 141221121 | 141221266 |
| chr4 | 141343581 | 141343716 |
| chr4 | 144495531 | 144495706 |
| chr4 | 144517351 | 144517496 |
| chr4 | 144551271 | 144551566 |
| chr4 | 144809241 | 144809416 |
| chr4 | 146893751 | 146893946 |
| chr4 | 147308051 | 147308216 |
| chr4 | 147313711 | 147313846 |
| chr4 | 147314221 | 147314436 |
| chr4 | 147481251 | 147481576 |
| chr4 | 147481781 | 147482226 |
| chr4 | 147524801 | 147524946 |
| chr4 | 147864771 | 147864866 |
| chr4 | 147880101 | 147880276 |
| chr4 | 147882661 | 147882966 |
| chr4 | 147986741 | 147986936 |
| chr4 | 148314781 | 148315036 |
| chr4 | 148353031 | 148353306 |
| chr4 | 148433981 | 148434176 |

|      |           |           |
|------|-----------|-----------|
| chr4 | 148453681 | 148453916 |
| chr4 | 148455691 | 148456056 |
| chr4 | 148456061 | 148456196 |
| chr4 | 148459901 | 148460076 |
| chr4 | 148524481 | 148524806 |
| chr4 | 148656351 | 148656546 |
| chr4 | 148779391 | 148779506 |
| chr4 | 148836711 | 148836956 |
| chr4 | 148936481 | 148936656 |
| chr4 | 149196421 | 149196536 |
| chr4 | 149294811 | 149295036 |
| chr4 | 149323231 | 149323366 |
| chr4 | 149325261 | 149325426 |
| chr4 | 149339871 | 149340096 |
| chr4 | 149340891 | 149341066 |
| chr4 | 149349311 | 149349616 |
| chr4 | 149351821 | 149352156 |
| chr4 | 149373281 | 149373396 |
| chr4 | 149374051 | 149374216 |
| chr4 | 149450361 | 149450646 |
| chr4 | 149461921 | 149462386 |
| chr4 | 149463301 | 149463626 |
| chr4 | 149511671 | 149511816 |
| chr4 | 149595361 | 149595516 |
| chr4 | 149625281 | 149625466 |
| chr4 | 149718511 | 149718686 |
| chr4 | 149792791 | 149793026 |
| chr4 | 150021221 | 150021456 |
| chr4 | 150059051 | 150059346 |
| chr4 | 150083631 | 150083796 |
| chr4 | 150144791 | 150145006 |
| chr4 | 150149901 | 150150066 |
| chr4 | 150158541 | 150158766 |
| chr4 | 150195471 | 150195656 |
| chr4 | 150243561 | 150244106 |
| chr4 | 150246481 | 150246736 |
| chr4 | 150263521 | 150263786 |
| chr4 | 150263991 | 150264156 |
| chr4 | 150432661 | 150432886 |
| chr4 | 151130601 | 151130816 |
| chr4 | 151311541 | 151311816 |
| chr4 | 151446271 | 151446776 |
| chr4 | 151452291 | 151452416 |
| chr4 | 151452601 | 151452906 |
| chr4 | 151466991 | 151467256 |
| chr4 | 151567091 | 151567506 |
| chr4 | 151676331 | 151676586 |
| chr4 | 151749001 | 151749136 |
| chr4 | 153060121 | 153060476 |
| chr4 | 153399361 | 153399576 |
| chr4 | 154348541 | 154348726 |
| chr4 | 154513441 | 154513576 |
| chr4 | 154515041 | 154515226 |

|      |           |           |
|------|-----------|-----------|
| chr4 | 154564511 | 154564636 |
| chr4 | 154582491 | 154582736 |
| chr4 | 154607741 | 154607856 |
| chr4 | 154862761 | 154863056 |
| chr4 | 154940661 | 154940876 |
| chr4 | 154951211 | 154951596 |
| chr4 | 155034891 | 155035036 |
| chr4 | 155131121 | 155131326 |
| chr4 | 155188211 | 155188336 |
| chr4 | 155234581 | 155234776 |
| chr4 | 155566741 | 155566966 |
| chr3 | 9251581   | 9251876   |
| chr3 | 9252361   | 9252546   |
| chr3 | 10017451  | 10017946  |
| chr3 | 10205001  | 10205546  |
| chr3 | 10205721  | 10205936  |
| chr3 | 10207641  | 10207846  |
| chr3 | 10259771  | 10259936  |
| chr3 | 19896861  | 19897006  |
| chr3 | 20029551  | 20029746  |
| chr3 | 21457161  | 21457316  |
| chr3 | 21860041  | 21860306  |
| chr3 | 21980511  | 21980696  |
| chr3 | 27355621  | 27355796  |
| chr3 | 27388851  | 27389156  |
| chr3 | 27390431  | 27390686  |
| chr3 | 27515491  | 27515956  |
| chr3 | 27585901  | 27586096  |
| chr3 | 27586151  | 27586356  |
| chr3 | 27611331  | 27611486  |
| chr3 | 27883541  | 27883676  |
| chr3 | 27991901  | 27992086  |
| chr3 | 30077631  | 30077886  |
| chr3 | 30265751  | 30266006  |
| chr3 | 30408321  | 30408476  |
| chr3 | 30445281  | 30445536  |
| chr3 | 30446471  | 30446726  |
| chr3 | 30665071  | 30665306  |
| chr3 | 30730801  | 30730946  |
| chr3 | 32246631  | 32246916  |
| chr3 | 35828821  | 35829066  |
| chr3 | 36083771  | 36084096  |
| chr3 | 36102181  | 36102366  |
| chr3 | 36370071  | 36370266  |
| chr3 | 36375431  | 36375686  |
| chr3 | 36381501  | 36381706  |
| chr3 | 37278761  | 37279006  |
| chr3 | 37279231  | 37279366  |
| chr3 | 37279491  | 37279716  |
| chr3 | 37541101  | 37541276  |
| chr3 | 37806531  | 37806836  |
| chr3 | 37827901  | 37828016  |
| chr3 | 38027221  | 38027376  |



|      |          |          |
|------|----------|----------|
| chr3 | 38030771 | 38030876 |
| chr3 | 38374491 | 38374686 |
| chr3 | 38546691 | 38546866 |
| chr3 | 40326161 | 40326296 |
| chr3 | 40754681 | 40755466 |
| chr3 | 40862031 | 40862286 |
| chr3 | 40866471 | 40866756 |
| chr3 | 41043781 | 41044076 |
| chr3 | 41070251 | 41070406 |
| chr3 | 41157731 | 41157986 |
| chr3 | 41168941 | 41169106 |
| chr3 | 41172211 | 41172486 |
| chr3 | 41212451 | 41212636 |
| chr3 | 41229931 | 41230046 |
| chr3 | 41338571 | 41338736 |
| chr3 | 41384951 | 41385196 |
| chr3 | 41392111 | 41392356 |
| chr3 | 41392831 | 41392976 |
| chr3 | 41393271 | 41393446 |
| chr3 | 41394381 | 41394636 |
| chr3 | 41402481 | 41402636 |
| chr3 | 42816401 | 42816626 |
| chr3 | 51031401 | 51031646 |
| chr3 | 51038711 | 51038946 |
| chr3 | 51057251 | 51057366 |
| chr3 | 51060561 | 51060926 |
| chr3 | 51336031 | 51336286 |
| chr3 | 51512961 | 51513216 |
| chr3 | 51515601 | 51515896 |
| chr3 | 51745851 | 51746016 |
| chr3 | 51892461 | 51892636 |
| chr3 | 51974791 | 51974906 |
| chr3 | 52074151 | 52074416 |
| chr3 | 52075061 | 52075366 |
| chr3 | 52097131 | 52097246 |
| chr3 | 52100671 | 52100986 |
| chr3 | 52107481 | 52107606 |
| chr3 | 52205041 | 52205196 |
| chr3 | 52205341 | 52205466 |
| chr3 | 52324421 | 52324566 |
| chr3 | 52331121 | 52331466 |
| chr3 | 52331721 | 52331866 |
| chr3 | 52370221 | 52370596 |
| chr3 | 52370881 | 52371116 |
| chr3 | 52571471 | 52571586 |
| chr3 | 52839531 | 52839756 |
| chr3 | 52906201 | 52906336 |
| chr3 | 53014321 | 53014766 |
| chr3 | 53025931 | 53026156 |
| chr3 | 53157871 | 53157976 |
| chr3 | 54203421 | 54203546 |
| chr3 | 55343981 | 55344186 |
| chr3 | 57361501 | 57361666 |

|      |          |          |
|------|----------|----------|
| chr3 | 57372001 | 57372186 |
| chr3 | 57427531 | 57427756 |
| chr3 | 58292511 | 58292666 |
| chr3 | 58312361 | 58312616 |
| chr3 | 59009041 | 59009226 |
| chr3 | 59251911 | 59252166 |
| chr3 | 60312281 | 60312576 |
| chr3 | 60320261 | 60320566 |
| chr3 | 60366371 | 60366516 |
| chr3 | 60366801 | 60366966 |
| chr3 | 63763631 | 63763746 |
| chr3 | 65259511 | 65259756 |
| chr3 | 65645211 | 65645466 |
| chr3 | 65662091 | 65662516 |
| chr3 | 65704211 | 65704666 |
| chr3 | 66028931 | 66029176 |
| chr3 | 66190261 | 66190376 |
| chr3 | 66542411 | 66542566 |
| chr3 | 67263511 | 67263636 |
| chr3 | 67328781 | 67328966 |
| chr3 | 67347281 | 67347456 |
| chr3 | 67358841 | 67358966 |
| chr3 | 69093831 | 69094066 |
| chr3 | 69122041 | 69122416 |
| chr3 | 69168481 | 69168806 |
| chr3 | 69202551 | 69202736 |
| chr3 | 69206991 | 69207166 |
| chr3 | 69340001 | 69340196 |
| chr3 | 74095191 | 74095326 |
| chr3 | 75500521 | 75500646 |
| chr3 | 75721651 | 75722246 |
| chr3 | 79037391 | 79037676 |
| chr3 | 79366421 | 79366536 |
| chr3 | 79373041 | 79373196 |
| chr3 | 79704071 | 79704236 |
| chr3 | 79908201 | 79908316 |
| chr3 | 83663461 | 83663716 |
| chr3 | 83788801 | 83788956 |
| chr3 | 83815811 | 83816066 |
| chr3 | 83885101 | 83885246 |
| chr3 | 83958401 | 83958536 |
| chr3 | 84372861 | 84373196 |
| chr3 | 84719361 | 84719486 |
| chr3 | 85568221 | 85568346 |
| chr3 | 85608351 | 85608626 |
| chr3 | 85631261 | 85631406 |
| chr3 | 85692001 | 85692186 |
| chr3 | 86114221 | 86114426 |
| chr3 | 86634641 | 86634776 |
| chr3 | 86641101 | 86641336 |
| chr3 | 86656821 | 86656946 |
| chr3 | 86706401 | 86706626 |
| chr3 | 87313031 | 87313136 |

|      |          |          |
|------|----------|----------|
| chr3 | 87332191 | 87332446 |
| chr3 | 87661611 | 87661926 |
| chr3 | 88037901 | 88038016 |
| chr3 | 88051001 | 88051186 |
| chr3 | 88157281 | 88157556 |
| chr3 | 88158491 | 88158686 |
| chr3 | 88217451 | 88217606 |
| chr3 | 88225521 | 88225676 |
| chr3 | 88245061 | 88245346 |
| chr3 | 88262861 | 88262996 |
| chr3 | 88331271 | 88331846 |
| chr3 | 89154531 | 89154686 |
| chr3 | 89156531 | 89156696 |
| chr3 | 89157331 | 89157576 |
| chr3 | 89183791 | 89184156 |
| chr3 | 89190411 | 89190836 |
| chr3 | 89191991 | 89192116 |
| chr3 | 89236161 | 89236286 |
| chr3 | 89243631 | 89243826 |
| chr3 | 89383141 | 89383346 |
| chr3 | 89699131 | 89699316 |
| chr3 | 89709401 | 89709706 |
| chr3 | 89709951 | 89710096 |
| chr3 | 89752571 | 89752716 |
| chr3 | 89889291 | 89889646 |
| chr3 | 90255921 | 90256096 |
| chr3 | 90342321 | 90342476 |
| chr3 | 90345061 | 90345336 |
| chr3 | 93364301 | 93364416 |
| chr3 | 94177011 | 94177556 |
| chr3 | 94286611 | 94286756 |
| chr3 | 94290721 | 94290846 |
| chr3 | 94454321 | 94454676 |
| chr3 | 94608751 | 94608906 |
| chr3 | 95037431 | 95037606 |
| chr3 | 95043561 | 95044326 |
| chr3 | 95072531 | 95072836 |
| chr3 | 95455321 | 95455526 |
| chr3 | 95455551 | 95455806 |
| chr3 | 95669341 | 95669556 |
| chr3 | 95782481 | 95782646 |
| chr3 | 96375891 | 96376126 |
| chr3 | 96378051 | 96378296 |
| chr3 | 96487211 | 96487466 |
| chr3 | 96488241 | 96488356 |
| chr3 | 96976201 | 96976586 |
| chr3 | 97013361 | 97013476 |
| chr3 | 97688551 | 97688696 |
| chr3 | 97717721 | 97717906 |
| chr3 | 97744681 | 97744816 |
| chr3 | 97854541 | 97854676 |
| chr3 | 97865311 | 97865556 |
| chr3 | 97873001 | 97873166 |

|      |           |           |
|------|-----------|-----------|
| chr3 | 97917251  | 97917406  |
| chr3 | 98071321  | 98071456  |
| chr3 | 98140831  | 98141076  |
| chr3 | 99960721  | 99960876  |
| chr3 | 100849401 | 100849536 |
| chr3 | 100851761 | 100852036 |
| chr3 | 100881781 | 100881976 |
| chr3 | 100946061 | 100946176 |
| chr3 | 100955141 | 100955276 |
| chr3 | 101084511 | 101084846 |
| chr3 | 101209641 | 101209806 |
| chr3 | 101310001 | 101310136 |
| chr3 | 101993431 | 101993546 |
| chr3 | 102165421 | 102165536 |
| chr3 | 102935761 | 102935956 |
| chr3 | 102950571 | 102950756 |
| chr3 | 103597921 | 103598056 |
| chr3 | 104083391 | 104083756 |
| chr3 | 104189551 | 104189836 |
| chr3 | 104230691 | 104230836 |
| chr3 | 104245381 | 104245666 |
| chr3 | 104466521 | 104466776 |
| chr3 | 104850331 | 104850796 |
| chr3 | 104939451 | 104939646 |
| chr3 | 105754381 | 105754586 |
| chr3 | 107660831 | 107660986 |
| chr3 | 107734541 | 107734706 |
| chr3 | 108062911 | 108063166 |
| chr3 | 108098411 | 108098656 |
| chr3 | 108108851 | 108109066 |
| chr3 | 108492031 | 108492206 |
| chr3 | 108492421 | 108492676 |
| chr3 | 108711201 | 108711376 |
| chr3 | 108956581 | 108956706 |
| chr3 | 109151001 | 109151156 |
| chr3 | 109169141 | 109169396 |
| chr3 | 109376831 | 109377006 |
| chr3 | 109395841 | 109396006 |
| chr3 | 115835711 | 115835836 |
| chr3 | 115893051 | 115893176 |
| chr3 | 115914791 | 115914876 |
| chr3 | 115994041 | 115994166 |
| chr3 | 116044301 | 116044436 |
| chr3 | 116122761 | 116122966 |
| chr3 | 116317201 | 116317456 |
| chr3 | 117570001 | 117570216 |
| chr3 | 121000071 | 121000256 |
| chr3 | 121054441 | 121054586 |
| chr3 | 121237461 | 121237676 |
| chr3 | 121307891 | 121308046 |
| chr3 | 121311841 | 121311956 |
| chr3 | 121387241 | 121387366 |
| chr3 | 121420131 | 121420246 |

|      |           |           |
|------|-----------|-----------|
| chr3 | 121421461 | 121421646 |
| chr3 | 121421731 | 121421836 |
| chr3 | 121425871 | 121425996 |
| chr3 | 121522451 | 121522656 |
| chr3 | 121617751 | 121617916 |
| chr3 | 121750971 | 121751126 |
| chr3 | 121767821 | 121767996 |
| chr3 | 121910781 | 121910916 |
| chr3 | 121950171 | 121950316 |
| chr3 | 122043591 | 122043856 |
| chr3 | 122090111 | 122090306 |
| chr3 | 122096981 | 122097226 |
| chr3 | 122121741 | 122121896 |
| chr3 | 122122301 | 122122416 |
| chr3 | 122124731 | 122125286 |
| chr3 | 122140731 | 122140876 |
| chr3 | 122150501 | 122150696 |
| chr3 | 122157821 | 122157956 |
| chr3 | 122158081 | 122158306 |
| chr3 | 122186351 | 122186716 |
| chr3 | 122187431 | 122187656 |
| chr3 | 122243251 | 122243666 |
| chr3 | 122268241 | 122268496 |
| chr3 | 122269641 | 122269776 |
| chr3 | 126260691 | 126260866 |
| chr3 | 126313121 | 126313356 |
| chr3 | 126317811 | 126318066 |
| chr3 | 126330831 | 126330996 |
| chr3 | 126333201 | 126333416 |
| chr3 | 126357951 | 126358336 |
| chr3 | 126361691 | 126361846 |
| chr3 | 126371601 | 126371956 |
| chr3 | 126701811 | 126701956 |
| chr3 | 126826361 | 126826486 |
| chr3 | 127474471 | 127474676 |
| chr3 | 128494961 | 128495086 |
| chr3 | 129151511 | 129151666 |
| chr3 | 129580771 | 129581006 |
| chr3 | 129584181 | 129584316 |
| chr3 | 130374291 | 130374506 |
| chr3 | 130394271 | 130394436 |
| chr3 | 130582151 | 130582486 |
| chr3 | 130587991 | 130588156 |
| chr3 | 130703511 | 130703766 |
| chr3 | 130787971 | 130788196 |
| chr3 | 130842561 | 130842896 |
| chr3 | 130857021 | 130857146 |
| chr3 | 130899011 | 130899186 |
| chr3 | 130905901 | 130906076 |
| chr3 | 130922671 | 130922816 |
| chr3 | 130935591 | 130935806 |
| chr3 | 130955721 | 130955876 |
| chr3 | 130986381 | 130986536 |

|      |           |           |
|------|-----------|-----------|
| chr3 | 131137341 | 131137526 |
| chr3 | 131301321 | 131301576 |
| chr3 | 131937931 | 131938186 |
| chr3 | 132527101 | 132527526 |
| chr3 | 132986141 | 132986296 |
| chr3 | 133169751 | 133169886 |
| chr3 | 135133441 | 135133596 |
| chr3 | 135148971 | 135149136 |
| chr3 | 135219481 | 135219626 |
| chr3 | 135904591 | 135904796 |
| chr3 | 136345221 | 136345456 |
| chr3 | 136347661 | 136347876 |
| chr3 | 136402261 | 136402386 |
| chr3 | 137210381 | 137210506 |
| chr3 | 137213701 | 137213936 |
| chr3 | 137551191 | 137551366 |
| chr3 | 137585211 | 137585336 |
| chr3 | 137732151 | 137732426 |
| chr3 | 137758581 | 137758866 |
| chr3 | 137933391 | 137933526 |
| chr3 | 137940631 | 137940786 |
| chr3 | 138110551 | 138110806 |
| chr3 | 138412491 | 138412736 |
| chr3 | 138416491 | 138416756 |
| chr3 | 138480411 | 138480616 |
| chr3 | 138527451 | 138527666 |
| chr3 | 141956481 | 141956756 |
| chr3 | 142403121 | 142403396 |
| chr3 | 143294241 | 143294496 |
| chr3 | 143777091 | 143777326 |
| chr3 | 143860371 | 143860536 |
| chr3 | 144220861 | 144221076 |
| chr3 | 144377661 | 144377876 |
| chr3 | 144378501 | 144378616 |
| chr3 | 144378991 | 144379136 |
| chr3 | 145305961 | 145306216 |
| chr3 | 145354481 | 145354576 |
| chr3 | 145354751 | 145355066 |
| chr3 | 145414661 | 145414886 |
| chr3 | 145486621 | 145486826 |
| chr3 | 145634611 | 145634736 |
| chr3 | 145909361 | 145909516 |
| chr3 | 145910391 | 145910546 |
| chr3 | 146161741 | 146161946 |
| chr3 | 146203381 | 146203506 |
| chr3 | 146757861 | 146758086 |
| chr3 | 146846821 | 146847056 |
| chr3 | 146950641 | 146950876 |
| chr3 | 146951631 | 146951786 |
| chr3 | 146960751 | 146960866 |
| chr3 | 148222901 | 148223076 |
| chr3 | 148397261 | 148397376 |
| chr3 | 148832431 | 148832566 |

|      |           |           |
|------|-----------|-----------|
| chr3 | 149160041 | 149160376 |
| chr3 | 151464461 | 151464786 |
| chr3 | 151496261 | 151496546 |
| chr3 | 151508821 | 151508946 |
| chr3 | 151556351 | 151556546 |
| chr3 | 151736511 | 151736746 |
| chr3 | 152011671 | 152011796 |
| chr3 | 152158011 | 152158236 |
| chr3 | 152207481 | 152207656 |
| chr3 | 153860161 | 153860366 |
| chr3 | 153960931 | 153961136 |
| chr3 | 153968331 | 153968496 |
| chr3 | 157337301 | 157337416 |
| chr3 | 157531321 | 157531436 |
| chr2 | 3101041   | 3101296   |
| chr2 | 3388851   | 3388996   |
| chr2 | 3670081   | 3670496   |
| chr2 | 3702951   | 3703206   |
| chr2 | 4530931   | 4531166   |
| chr2 | 4533151   | 4533446   |
| chr2 | 4917401   | 4917636   |
| chr2 | 4918151   | 4918416   |
| chr2 | 4956381   | 4956686   |
| chr2 | 5236331   | 5236556   |
| chr2 | 5516071   | 5516206   |
| chr2 | 5771931   | 5772136   |
| chr2 | 5773271   | 5773416   |
| chr2 | 5773441   | 5773576   |
| chr2 | 6007801   | 6007956   |
| chr2 | 6946721   | 6946886   |
| chr2 | 9991481   | 9991736   |
| chr2 | 9999701   | 9999846   |
| chr2 | 11405701  | 11405976  |
| chr2 | 11424891  | 11425246  |
| chr2 | 11445391  | 11445616  |
| chr2 | 11635841  | 11635996  |
| chr2 | 11689081  | 11689206  |
| chr2 | 13318141  | 13318266  |
| chr2 | 13500301  | 13500556  |
| chr2 | 14029611  | 14029906  |
| chr2 | 14263651  | 14263776  |
| chr2 | 14264081  | 14264196  |
| chr2 | 18074661  | 18074866  |
| chr2 | 18075981  | 18076176  |
| chr2 | 18361541  | 18361656  |
| chr2 | 18744471  | 18744676  |
| chr2 | 18860741  | 18860976  |
| chr2 | 22933791  | 22934116  |
| chr2 | 24744661  | 24744866  |
| chr2 | 25392171  | 25392646  |
| chr2 | 25430961  | 25431246  |
| chr2 | 26063701  | 26063876  |
| chr2 | 26220271  | 26220516  |

|      |          |          |
|------|----------|----------|
| chr2 | 26220621 | 26220906 |
| chr2 | 26357661 | 26357786 |
| chr2 | 26359691 | 26359886 |
| chr2 | 26443771 | 26443896 |
| chr2 | 26444881 | 26445106 |
| chr2 | 26445711 | 26446246 |
| chr2 | 26446951 | 26447066 |
| chr2 | 26460091 | 26460326 |
| chr2 | 26898501 | 26898626 |
| chr2 | 26952931 | 26953066 |
| chr2 | 26975901 | 26976186 |
| chr2 | 27061201 | 27061366 |
| chr2 | 27061671 | 27062036 |
| chr2 | 27062061 | 27062306 |
| chr2 | 27321481 | 27321596 |
| chr2 | 27462551 | 27462766 |
| chr2 | 27500771 | 27500906 |
| chr2 | 27539681 | 27539936 |
| chr2 | 27540411 | 27540556 |
| chr2 | 27543281 | 27543416 |
| chr2 | 27544691 | 27544866 |
| chr2 | 27546081 | 27546646 |
| chr2 | 27553771 | 27553906 |
| chr2 | 27558981 | 27559156 |
| chr2 | 27570201 | 27570456 |
| chr2 | 27575211 | 27575676 |
| chr2 | 27578011 | 27578196 |
| chr2 | 27635151 | 27635286 |
| chr2 | 27703601 | 27703796 |
| chr2 | 27753071 | 27753206 |
| chr2 | 28247861 | 28247976 |
| chr2 | 28352431 | 28352596 |
| chr2 | 29377171 | 29377306 |
| chr2 | 29381631 | 29381886 |
| chr2 | 29504871 | 29505106 |
| chr2 | 29517501 | 29517646 |
| chr2 | 29866231 | 29866486 |
| chr2 | 30105691 | 30105816 |
| chr2 | 30204031 | 30204276 |
| chr2 | 30233291 | 30233456 |
| chr2 | 30258091 | 30258506 |
| chr2 | 30265521 | 30265736 |
| chr2 | 30266471 | 30266696 |
| chr2 | 30269141 | 30269476 |
| chr2 | 30274231 | 30274486 |
| chr2 | 30274531 | 30275176 |
| chr2 | 30566241 | 30566386 |
| chr2 | 30629491 | 30629666 |
| chr2 | 30719261 | 30719376 |
| chr2 | 30730171 | 30730296 |
| chr2 | 30768841 | 30768996 |
| chr2 | 30782411 | 30782666 |
| chr2 | 30905481 | 30905836 |



|      |          |          |
|------|----------|----------|
| chr2 | 30906541 | 30906756 |
| chr2 | 30916301 | 30916606 |
| chr2 | 30951701 | 30951786 |
| chr2 | 30951971 | 30952226 |
| chr2 | 30962551 | 30962796 |
| chr2 | 30967321 | 30967536 |
| chr2 | 30982861 | 30982986 |
| chr2 | 31020741 | 31021096 |
| chr2 | 31309671 | 31309916 |
| chr2 | 31323521 | 31323656 |
| chr2 | 31546251 | 31546546 |
| chr2 | 31650351 | 31650536 |
| chr2 | 31889061 | 31889226 |
| chr2 | 32030541 | 32030706 |
| chr2 | 32042421 | 32042506 |
| chr2 | 32102611 | 32102746 |
| chr2 | 32105141 | 32105276 |
| chr2 | 32105621 | 32105856 |
| chr2 | 32110261 | 32110486 |
| chr2 | 32112041 | 32112286 |
| chr2 | 32113201 | 32113316 |
| chr2 | 32113621 | 32113736 |
| chr2 | 32149721 | 32149956 |
| chr2 | 32181461 | 32181626 |
| chr2 | 32255971 | 32256136 |
| chr2 | 32294781 | 32294926 |
| chr2 | 32384211 | 32384476 |
| chr2 | 32422811 | 32422996 |
| chr2 | 32445861 | 32446316 |
| chr2 | 32465601 | 32466026 |
| chr2 | 32622711 | 32622956 |
| chr2 | 32727791 | 32727976 |
| chr2 | 32769831 | 32769966 |
| chr2 | 32780011 | 32780446 |
| chr2 | 32784911 | 32785096 |
| chr2 | 32889171 | 32889396 |
| chr2 | 33015541 | 33015856 |
| chr2 | 33016001 | 33016366 |
| chr2 | 33042301 | 33042526 |
| chr2 | 33075831 | 33076106 |
| chr2 | 33156531 | 33156766 |
| chr2 | 33831221 | 33831406 |
| chr2 | 33881711 | 33881846 |
| chr2 | 34002911 | 34003346 |
| chr2 | 34116421 | 34116626 |
| chr2 | 34202871 | 34202996 |
| chr2 | 34380261 | 34380456 |
| chr2 | 34425131 | 34425336 |
| chr2 | 34709561 | 34709756 |
| chr2 | 34709901 | 34710056 |
| chr2 | 34721481 | 34721616 |
| chr2 | 34756861 | 34756976 |
| chr2 | 34760631 | 34760836 |

|      |          |          |
|------|----------|----------|
| chr2 | 34762021 | 34762256 |
| chr2 | 34793591 | 34793766 |
| chr2 | 34824541 | 34824796 |
| chr2 | 35025951 | 35026106 |
| chr2 | 35126341 | 35126496 |
| chr2 | 35267371 | 35267566 |
| chr2 | 35287521 | 35287776 |
| chr2 | 35366471 | 35366606 |
| chr2 | 35536011 | 35536146 |
| chr2 | 35544301 | 35544456 |
| chr2 | 35547761 | 35548156 |
| chr2 | 35548541 | 35548756 |
| chr2 | 35557661 | 35557786 |
| chr2 | 35558441 | 35558786 |
| chr2 | 35559601 | 35559776 |
| chr2 | 35783271 | 35783666 |
| chr2 | 35903851 | 35903966 |
| chr2 | 35932391 | 35932506 |
| chr2 | 36044601 | 36044786 |
| chr2 | 37710521 | 37710656 |
| chr2 | 37734551 | 37734676 |
| chr2 | 38210511 | 38210896 |
| chr2 | 38214931 | 38215096 |
| chr2 | 38393631 | 38393966 |
| chr2 | 38393981 | 38394306 |
| chr2 | 38808841 | 38808956 |
| chr2 | 38809191 | 38809306 |
| chr2 | 38809901 | 38810056 |
| chr2 | 43959821 | 43960196 |
| chr2 | 43968511 | 43968716 |
| chr2 | 43969531 | 43969756 |
| chr2 | 44317221 | 44317336 |
| chr2 | 44413711 | 44413856 |
| chr2 | 44927321 | 44927576 |
| chr2 | 44941181 | 44941326 |
| chr2 | 44951361 | 44951586 |
| chr2 | 44953401 | 44953526 |
| chr2 | 44953531 | 44953656 |
| chr2 | 44953661 | 44953796 |
| chr2 | 44957781 | 44957916 |
| chr2 | 44962391 | 44962506 |
| chr2 | 44963731 | 44963896 |
| chr2 | 44971211 | 44971416 |
| chr2 | 45217011 | 45217256 |
| chr2 | 45267281 | 45267436 |
| chr2 | 45413921 | 45414056 |
| chr2 | 45430001 | 45430166 |
| chr2 | 45449831 | 45449956 |
| chr2 | 46023681 | 46023836 |
| chr2 | 48011851 | 48011966 |
| chr2 | 48281101 | 48281286 |
| chr2 | 48326941 | 48327106 |
| chr2 | 48337061 | 48337216 |

|      |          |          |
|------|----------|----------|
| chr2 | 48351711 | 48351836 |
| chr2 | 48424281 | 48424466 |
| chr2 | 49425211 | 49425376 |
| chr2 | 49425601 | 49425986 |
| chr2 | 49627771 | 49627906 |
| chr2 | 49661531 | 49661946 |
| chr2 | 49663861 | 49663986 |
| chr2 | 49700671 | 49700926 |
| chr2 | 50006191 | 50006446 |
| chr2 | 50139571 | 50139786 |
| chr2 | 50938261 | 50938436 |
| chr2 | 51124591 | 51124776 |
| chr2 | 51907801 | 51908026 |
| chr2 | 52275721 | 52275936 |
| chr2 | 52293631 | 52293776 |
| chr2 | 52332441 | 52332706 |
| chr2 | 52332931 | 52333036 |
| chr2 | 52333941 | 52334256 |
| chr2 | 52599751 | 52599986 |
| chr2 | 52663581 | 52663766 |
| chr2 | 52703851 | 52704176 |
| chr2 | 52704391 | 52704506 |
| chr2 | 52743651 | 52743836 |
| chr2 | 52753671 | 52753786 |
| chr2 | 52909601 | 52909756 |
| chr2 | 52914421 | 52914566 |
| chr2 | 56011081 | 56011196 |
| chr2 | 58339481 | 58339606 |
| chr2 | 59027851 | 59028176 |
| chr2 | 59031451 | 59031566 |
| chr2 | 59186741 | 59186946 |
| chr2 | 59337511 | 59337606 |
| chr2 | 59433771 | 59433936 |
| chr2 | 59466261 | 59466736 |
| chr2 | 59466741 | 59466996 |
| chr2 | 59511581 | 59511746 |
| chr2 | 59514541 | 59514746 |
| chr2 | 59610271 | 59610526 |
| chr2 | 59639761 | 59639976 |
| chr2 | 59750441 | 59750676 |
| chr2 | 59835701 | 59835816 |
| chr2 | 59957261 | 59957456 |
| chr2 | 60071101 | 60071286 |
| chr2 | 60120871 | 60121006 |
| chr2 | 60206321 | 60206626 |
| chr2 | 60283451 | 60283576 |
| chr2 | 60635491 | 60635726 |
| chr2 | 60637181 | 60637566 |
| chr2 | 60665071 | 60665266 |
| chr2 | 60700941 | 60701086 |
| chr2 | 60703171 | 60703366 |
| chr2 | 60707011 | 60707296 |
| chr2 | 60730601 | 60730726 |

|      |          |          |
|------|----------|----------|
| chr2 | 60760491 | 60760606 |
| chr2 | 61134651 | 61134956 |
| chr2 | 61415511 | 61415706 |
| chr2 | 62437471 | 62437596 |
| chr2 | 64892491 | 64892766 |
| chr2 | 64951251 | 64951446 |
| chr2 | 65106801 | 65107056 |
| chr2 | 66017991 | 66018226 |
| chr2 | 68215561 | 68215786 |
| chr2 | 68250281 | 68250526 |
| chr2 | 68310821 | 68311006 |
| chr2 | 68644611 | 68644776 |
| chr2 | 69467481 | 69467766 |
| chr2 | 69827341 | 69827596 |
| chr2 | 70481681 | 70481936 |
| chr2 | 70640771 | 70640916 |
| chr2 | 71094711 | 71094956 |
| chr2 | 71112161 | 71112286 |
| chr2 | 71344201 | 71344496 |
| chr2 | 71372721 | 71372906 |
| chr2 | 71451841 | 71451936 |
| chr2 | 71528631 | 71528886 |
| chr2 | 71561071 | 71561236 |
| chr2 | 71589501 | 71589936 |
| chr2 | 71613291 | 71613436 |
| chr2 | 71628831 | 71629036 |
| chr2 | 71634811 | 71635136 |
| chr2 | 71639161 | 71639286 |
| chr2 | 71644711 | 71644966 |
| chr2 | 71648251 | 71648376 |
| chr2 | 71649281 | 71649456 |
| chr2 | 71662241 | 71662406 |
| chr2 | 71730811 | 71731046 |
| chr2 | 71916781 | 71916896 |
| chr2 | 72059361 | 72059486 |
| chr2 | 72059771 | 72059886 |
| chr2 | 72147181 | 72147336 |
| chr2 | 72147871 | 72148076 |
| chr2 | 72150891 | 72151146 |
| chr2 | 72151441 | 72151766 |
| chr2 | 72436011 | 72436186 |
| chr2 | 72494101 | 72494216 |
| chr2 | 72687941 | 72688216 |
| chr2 | 72746251 | 72746576 |
| chr2 | 72822261 | 72822566 |
| chr2 | 72823021 | 72823256 |
| chr2 | 72869591 | 72869756 |
| chr2 | 72885551 | 72885716 |
| chr2 | 73051241 | 73051496 |
| chr2 | 73174531 | 73174846 |
| chr2 | 73209901 | 73210366 |
| chr2 | 73213381 | 73213626 |
| chr2 | 73378651 | 73378936 |

|      |          |          |
|------|----------|----------|
| chr2 | 73953801 | 73953956 |
| chr2 | 74545751 | 74546006 |
| chr2 | 74546701 | 74546956 |
| chr2 | 74551821 | 74552516 |
| chr2 | 74576111 | 74576296 |
| chr2 | 74771391 | 74771646 |
| chr2 | 74809261 | 74809506 |
| chr2 | 74868381 | 74868546 |
| chr2 | 74951141 | 74951256 |
| chr2 | 75521051 | 75521316 |
| chr2 | 75531061 | 75531256 |
| chr2 | 75534011 | 75534266 |
| chr2 | 75590791 | 75590936 |
| chr2 | 75615271 | 75615516 |
| chr2 | 76528971 | 76529116 |
| chr2 | 77091571 | 77091756 |
| chr2 | 77091871 | 77092226 |
| chr2 | 77123841 | 77123976 |
| chr2 | 77707731 | 77707886 |
| chr2 | 77715111 | 77715336 |
| chr2 | 77716271 | 77716516 |
| chr2 | 77717941 | 77718096 |
| chr2 | 77720411 | 77720506 |
| chr2 | 77725561 | 77725746 |
| chr2 | 77735181 | 77735946 |
| chr2 | 77741271 | 77741536 |
| chr2 | 77742861 | 77744476 |
| chr2 | 77744761 | 77745356 |
| chr2 | 77745401 | 77746086 |
| chr2 | 77746091 | 77746436 |
| chr2 | 77754771 | 77755146 |
| chr2 | 77755291 | 77755536 |
| chr2 | 77755801 | 77756016 |
| chr2 | 77756031 | 77756976 |
| chr2 | 77757981 | 77758176 |
| chr2 | 77761521 | 77761746 |
| chr2 | 77762331 | 77762466 |
| chr2 | 77763011 | 77764246 |
| chr2 | 77764641 | 77764796 |
| chr2 | 77765941 | 77766196 |
| chr2 | 77770261 | 77770426 |
| chr2 | 77771411 | 77771596 |
| chr2 | 77772581 | 77772816 |
| chr2 | 77776981 | 77777136 |
| chr2 | 77777391 | 77778066 |
| chr2 | 77779221 | 77779326 |
| chr2 | 77779611 | 77779836 |
| chr2 | 77780361 | 77780476 |
| chr2 | 77781601 | 77781836 |
| chr2 | 77782241 | 77783236 |
| chr2 | 77817021 | 77817626 |
| chr2 | 77827211 | 77827336 |
| chr2 | 77827561 | 77827676 |

|      |          |          |
|------|----------|----------|
| chr2 | 77843741 | 77844026 |
| chr2 | 77859511 | 77859786 |
| chr2 | 77860301 | 77860416 |
| chr2 | 79920751 | 79920896 |
| chr2 | 80046711 | 80046826 |
| chr2 | 80411201 | 80411386 |
| chr2 | 84227281 | 84227666 |
| chr2 | 84366081 | 84366216 |
| chr2 | 84581281 | 84581396 |
| chr2 | 84642921 | 84643046 |
| chr2 | 84680751 | 84680886 |
| chr2 | 84691131 | 84691866 |
| chr2 | 84892201 | 84892446 |
| chr2 | 84902201 | 84902296 |
| chr2 | 84902821 | 84904246 |
| chr2 | 84911821 | 84911996 |
| chr2 | 90623551 | 90623986 |
| chr2 | 90950361 | 90950606 |
| chr2 | 90950821 | 90950996 |
| chr2 | 91024731 | 91024946 |
| chr2 | 91034451 | 91034776 |
| chr2 | 91034941 | 91035366 |
| chr2 | 91153211 | 91153446 |
| chr2 | 91296691 | 91296866 |
| chr2 | 91711041 | 91711276 |
| chr2 | 91851401 | 91851686 |
| chr2 | 91869561 | 91869926 |
| chr2 | 91895511 | 91895626 |
| chr2 | 92039741 | 92039956 |
| chr2 | 92194231 | 92194486 |
| chr2 | 92216871 | 92217036 |
| chr2 | 92218411 | 92218586 |
| chr2 | 92225761 | 92225996 |
| chr2 | 92253771 | 92253886 |
| chr2 | 92263801 | 92264166 |
| chr2 | 92270001 | 92270246 |
| chr2 | 92270341 | 92270576 |
| chr2 | 92272181 | 92272436 |
| chr2 | 92453331 | 92453586 |
| chr2 | 92454081 | 92454336 |
| chr2 | 92454421 | 92454656 |
| chr2 | 92579921 | 92580116 |
| chr2 | 92798981 | 92799226 |
| chr2 | 92854211 | 92854446 |
| chr2 | 92872221 | 92872436 |
| chr2 | 92888101 | 92888256 |
| chr2 | 93279601 | 93279846 |
| chr2 | 93280151 | 93280406 |
| chr2 | 93297811 | 93297966 |
| chr2 | 93303131 | 93303386 |
| chr2 | 93500461 | 93500626 |
| chr2 | 93502811 | 93503106 |
| chr2 | 93543601 | 93543976 |

|      |           |           |
|------|-----------|-----------|
| chr2 | 93570261  | 93570516  |
| chr2 | 93617241  | 93617376  |
| chr2 | 93619581  | 93619826  |
| chr2 | 93631681  | 93632066  |
| chr2 | 93637521  | 93637676  |
| chr2 | 93661191  | 93661316  |
| chr2 | 93694991  | 93695166  |
| chr2 | 93892781  | 93892926  |
| chr2 | 93962481  | 93962666  |
| chr2 | 94182181  | 94182346  |
| chr2 | 94182671  | 94182906  |
| chr2 | 101524661 | 101524846 |
| chr2 | 101603371 | 101603636 |
| chr2 | 101650841 | 101651076 |
| chr2 | 101822351 | 101822606 |
| chr2 | 101839011 | 101839466 |
| chr2 | 101956921 | 101957046 |
| chr2 | 101971411 | 101971536 |
| chr2 | 101982351 | 101982596 |
| chr2 | 102011861 | 102012066 |
| chr2 | 102014371 | 102014486 |
| chr2 | 102016371 | 102016886 |
| chr2 | 102031831 | 102032086 |
| chr2 | 102047421 | 102047536 |
| chr2 | 102206341 | 102206496 |
| chr2 | 102751201 | 102751326 |
| chr2 | 102822841 | 102823076 |
| chr2 | 102881181 | 102881356 |
| chr2 | 103295921 | 103296146 |
| chr2 | 103301381 | 103301476 |
| chr2 | 103319821 | 103320076 |
| chr2 | 103551171 | 103551426 |
| chr2 | 103766001 | 103766136 |
| chr2 | 103884311 | 103884426 |
| chr2 | 105012291 | 105012446 |
| chr2 | 105513741 | 105513896 |
| chr2 | 105567051 | 105567186 |
| chr2 | 106903841 | 106903976 |
| chr2 | 109065021 | 109065136 |
| chr2 | 109753791 | 109753926 |
| chr2 | 109759101 | 109759326 |
| chr2 | 109759361 | 109759616 |
| chr2 | 109776141 | 109776486 |
| chr2 | 109793451 | 109793746 |
| chr2 | 109809151 | 109809366 |
| chr2 | 109836641 | 109836936 |
| chr2 | 109852321 | 109852476 |
| chr2 | 112118521 | 112118816 |
| chr2 | 113485431 | 113485786 |
| chr2 | 113646501 | 113646626 |
| chr2 | 114840031 | 114840266 |
| chr2 | 114893151 | 114893306 |
| chr2 | 115516751 | 115517006 |

|      |           |           |
|------|-----------|-----------|
| chr2 | 115601271 | 115601426 |
| chr2 | 115764741 | 115764946 |
| chr2 | 115765211 | 115765466 |
| chr2 | 115843981 | 115844316 |
| chr2 | 115846371 | 115846496 |
| chr2 | 115846721 | 115847106 |
| chr2 | 115874851 | 115875036 |
| chr2 | 116119791 | 116119916 |
| chr2 | 116851341 | 116851456 |
| chr2 | 117281761 | 117281886 |
| chr2 | 117884331 | 117884576 |
| chr2 | 118165611 | 118165866 |
| chr2 | 118325071 | 118325206 |
| chr2 | 118336261 | 118336626 |
| chr2 | 118362251 | 118362626 |
| chr2 | 118362831 | 118362966 |
| chr2 | 118372581 | 118372766 |
| chr2 | 118429591 | 118429766 |
| chr2 | 118435721 | 118435916 |
| chr2 | 118526501 | 118526696 |
| chr2 | 118576311 | 118576446 |
| chr2 | 118608731 | 118608906 |
| chr2 | 118740541 | 118740786 |
| chr2 | 118741561 | 118741816 |
| chr2 | 118976631 | 118976746 |
| chr2 | 118977531 | 118977686 |
| chr2 | 118981151 | 118981336 |
| chr2 | 118997591 | 118997936 |
| chr2 | 119146491 | 119146606 |
| chr2 | 119184031 | 119184286 |
| chr2 | 119567031 | 119567356 |
| chr2 | 119619141 | 119619256 |
| chr2 | 119798891 | 119799026 |
| chr2 | 119814881 | 119814996 |
| chr2 | 119880611 | 119880736 |
| chr2 | 121178891 | 121179346 |
| chr2 | 121179961 | 121180216 |
| chr2 | 121409411 | 121409806 |
| chr2 | 121586521 | 121586676 |
| chr2 | 124097131 | 124097346 |
| chr2 | 125037671 | 125037796 |
| chr2 | 125037971 | 125038156 |
| chr2 | 125089071 | 125089286 |
| chr2 | 125181991 | 125182146 |
| chr2 | 125274701 | 125274866 |
| chr2 | 125403381 | 125403636 |
| chr2 | 125619011 | 125619266 |
| chr2 | 125846791 | 125846906 |
| chr2 | 127561381 | 127561546 |
| chr2 | 127962531 | 127962756 |
| chr2 | 127962991 | 127963696 |
| chr2 | 127992351 | 127992636 |
| chr2 | 128113801 | 128113916 |



|      |           |           |
|------|-----------|-----------|
| chr2 | 128212461 | 128212636 |
| chr2 | 128217631 | 128217806 |
| chr2 | 128263841 | 128264306 |
| chr2 | 128264331 | 128264526 |
| chr2 | 128265201 | 128265386 |
| chr2 | 128266851 | 128267106 |
| chr2 | 128267311 | 128267696 |
| chr2 | 128270321 | 128270436 |
| chr2 | 128270701 | 128271196 |
| chr2 | 128271241 | 128271416 |
| chr2 | 128391261 | 128391386 |
| chr2 | 128438091 | 128438316 |
| chr2 | 128506381 | 128506696 |
| chr2 | 128525271 | 128525506 |
| chr2 | 128538701 | 128538916 |
| chr2 | 128557181 | 128557486 |
| chr2 | 128572611 | 128572926 |
| chr2 | 128573041 | 128573186 |
| chr2 | 128791501 | 128791706 |
| chr2 | 128893531 | 128893796 |
| chr2 | 129980931 | 129981186 |
| chr2 | 130412681 | 130412866 |
| chr2 | 130564041 | 130564306 |
| chr2 | 130758631 | 130758966 |
| chr2 | 130772151 | 130772346 |
| chr2 | 130977081 | 130977236 |
| chr2 | 131004461 | 131004806 |
| chr2 | 131029991 | 131030106 |
| chr2 | 131170451 | 131170576 |
| chr2 | 131176111 | 131176356 |
| chr2 | 131221731 | 131221856 |
| chr2 | 131277891 | 131278146 |
| chr2 | 131286851 | 131287006 |
| chr2 | 131367261 | 131367516 |
| chr2 | 131378541 | 131378826 |
| chr2 | 131384951 | 131385086 |
| chr2 | 131396511 | 131396676 |
| chr2 | 131396861 | 131396996 |
| chr2 | 131515581 | 131515696 |
| chr2 | 131671931 | 131672326 |
| chr2 | 131734171 | 131734346 |
| chr2 | 131873901 | 131874186 |
| chr2 | 131885771 | 131885916 |
| chr2 | 131893361 | 131893636 |
| chr2 | 132061631 | 132061796 |
| chr2 | 132401451 | 132401766 |
| chr2 | 132515601 | 132515746 |
| chr2 | 134613061 | 134613206 |
| chr2 | 134637791 | 134637936 |
| chr2 | 135149661 | 135149926 |
| chr2 | 135539261 | 135539466 |
| chr2 | 135593641 | 135593896 |
| chr2 | 135673421 | 135673896 |

|      |           |           |
|------|-----------|-----------|
| chr2 | 135676431 | 135676616 |
| chr2 | 135692821 | 135692966 |
| chr2 | 135694831 | 135695156 |
| chr2 | 135741731 | 135741966 |
| chr2 | 136505501 | 136505706 |
| chr2 | 136511411 | 136511606 |
| chr2 | 136782151 | 136782286 |
| chr2 | 136804501 | 136804626 |
| chr2 | 136898521 | 136898776 |
| chr2 | 136899781 | 136900056 |
| chr2 | 136905531 | 136905826 |
| chr2 | 136906781 | 136907096 |
| chr2 | 137001151 | 137001286 |
| chr2 | 137183071 | 137183286 |
| chr2 | 137206381 | 137206606 |
| chr2 | 137243621 | 137243796 |
| chr2 | 137263641 | 137263786 |
| chr2 | 138086971 | 138087226 |
| chr2 | 138088701 | 138089056 |
| chr2 | 138107601 | 138107906 |
| chr2 | 138109311 | 138109566 |
| chr2 | 139503011 | 139503276 |
| chr2 | 140875831 | 140876036 |
| chr2 | 141114191 | 141114316 |
| chr2 | 142477251 | 142477506 |
| chr2 | 142524431 | 142524696 |
| chr2 | 142526581 | 142526696 |
| chr2 | 142595631 | 142595866 |
| chr2 | 143184061 | 143184226 |
| chr2 | 143960361 | 143960536 |
| chr2 | 144267581 | 144267886 |
| chr2 | 145526271 | 145526456 |
| chr2 | 145553881 | 145554056 |
| chr2 | 145578361 | 145578516 |
| chr2 | 145633051 | 145633216 |
| chr2 | 145657771 | 145657926 |
| chr2 | 145681531 | 145681816 |
| chr2 | 145683641 | 145683836 |
| chr2 | 146071151 | 146071586 |
| chr2 | 146321501 | 146321626 |
| chr2 | 146329131 | 146329246 |
| chr2 | 146372261 | 146372436 |
| chr2 | 148232831 | 148232946 |
| chr2 | 148278791 | 148279236 |
| chr2 | 148335811 | 148336036 |
| chr2 | 148505201 | 148505336 |
| chr2 | 150576431 | 150576626 |
| chr2 | 150634041 | 150634186 |
| chr2 | 150646601 | 150646726 |
| chr2 | 150660431 | 150660636 |
| chr2 | 150753181 | 150753326 |
| chr2 | 151398201 | 151398456 |
| chr2 | 151450821 | 151450986 |

|      |           |           |
|------|-----------|-----------|
| chr2 | 152107201 | 152107466 |
| chr2 | 152163991 | 152164336 |
| chr2 | 152170281 | 152170616 |
| chr2 | 152497911 | 152498166 |
| chr2 | 152499961 | 152500286 |
| chr2 | 152520151 | 152520386 |
| chr2 | 152520681 | 152520916 |
| chr2 | 152521001 | 152521126 |
| chr2 | 152542061 | 152542286 |
| chr2 | 152606561 | 152606676 |
| chr2 | 152611331 | 152611966 |
| chr2 | 152733071 | 152733276 |
| chr2 | 152745921 | 152746046 |
| chr2 | 152746091 | 152746316 |
| chr2 | 152757301 | 152757646 |
| chr2 | 152757941 | 152758086 |
| chr2 | 153001811 | 153001946 |
| chr2 | 153410321 | 153410536 |
| chr2 | 154377971 | 154378456 |
| chr2 | 154410651 | 154410866 |
| chr2 | 154423861 | 154424146 |
| chr2 | 154440841 | 154440956 |
| chr2 | 154762391 | 154762566 |
| chr2 | 155104421 | 155104576 |
| chr2 | 155460631 | 155460766 |
| chr2 | 155467551 | 155467686 |
| chr2 | 155568511 | 155568686 |
| chr2 | 155699501 | 155699756 |
| chr2 | 155729051 | 155729456 |
| chr2 | 155754091 | 155754216 |
| chr2 | 155765141 | 155765366 |
| chr2 | 155767841 | 155768056 |
| chr2 | 155770281 | 155770486 |
| chr2 | 155770781 | 155771046 |
| chr2 | 155817591 | 155817796 |
| chr2 | 155833351 | 155833626 |
| chr2 | 155891651 | 155891896 |
| chr2 | 155891901 | 155892176 |
| chr2 | 156030701 | 156030846 |
| chr2 | 156070831 | 156071046 |
| chr2 | 156124011 | 156124236 |
| chr2 | 156149201 | 156149366 |
| chr2 | 156149891 | 156150026 |
| chr2 | 156246721 | 156246956 |
| chr2 | 156296671 | 156296806 |
| chr2 | 156311691 | 156312246 |
| chr2 | 156315671 | 156316296 |
| chr2 | 156316301 | 156316896 |
| chr2 | 156319921 | 156320256 |
| chr2 | 156320591 | 156320846 |
| chr2 | 156552361 | 156552496 |
| chr2 | 156552651 | 156552866 |
| chr2 | 156664051 | 156664286 |

|      |           |           |
|------|-----------|-----------|
| chr2 | 156670701 | 156670866 |
| chr2 | 156695371 | 156695646 |
| chr2 | 156716801 | 156717026 |
| chr2 | 156761681 | 156761946 |
| chr2 | 156863241 | 156863486 |
| chr2 | 156879941 | 156880076 |
| chr2 | 156880361 | 156880536 |
| chr2 | 156899941 | 156900206 |
| chr2 | 157031751 | 157032016 |
| chr2 | 157125781 | 157125976 |
| chr2 | 157161111 | 157161286 |
| chr2 | 157173901 | 157174056 |
| chr2 | 157248581 | 157248716 |
| chr2 | 157293001 | 157293316 |
| chr2 | 157352031 | 157352246 |
| chr2 | 157352281 | 157352546 |
| chr2 | 157377891 | 157378246 |
| chr2 | 157378411 | 157378636 |
| chr2 | 157383801 | 157384256 |
| chr2 | 157577321 | 157577466 |
| chr2 | 157594911 | 157595226 |
| chr2 | 157595391 | 157595646 |
| chr2 | 157954651 | 157954846 |
| chr2 | 157955081 | 157955386 |
| chr2 | 157960631 | 157960796 |
| chr2 | 157960821 | 157960936 |
| chr2 | 158005261 | 158005396 |
| chr2 | 158016731 | 158016966 |
| chr2 | 158024141 | 158024376 |
| chr2 | 158349111 | 158349226 |
| chr2 | 160884901 | 160885046 |
| chr2 | 162626901 | 162627066 |
| chr2 | 162799091 | 162799206 |
| chr2 | 163222441 | 163222556 |
| chr2 | 163291341 | 163291746 |
| chr2 | 163412471 | 163412726 |
| chr2 | 163487321 | 163487666 |
| chr2 | 163525221 | 163525466 |
| chr2 | 163538151 | 163538456 |
| chr2 | 163567621 | 163567826 |
| chr2 | 163649721 | 163650046 |
| chr2 | 163652021 | 163652276 |
| chr2 | 163770421 | 163770566 |
| chr2 | 163790451 | 163790596 |
| chr2 | 163824581 | 163824996 |
| chr2 | 163827091 | 163827396 |
| chr2 | 163828851 | 163829096 |
| chr2 | 163829261 | 163829506 |
| chr2 | 163830261 | 163830416 |
| chr2 | 163832831 | 163833106 |
| chr2 | 163879531 | 163879786 |
| chr2 | 164248721 | 164249206 |
| chr2 | 164261361 | 164261516 |

|      |           |           |
|------|-----------|-----------|
| chr2 | 164269021 | 164269296 |
| chr2 | 164269321 | 164269606 |
| chr2 | 164313391 | 164313506 |
| chr2 | 164616401 | 164616656 |
| chr2 | 164628701 | 164628936 |
| chr2 | 164685371 | 164685606 |
| chr2 | 165113891 | 165114116 |
| chr2 | 165138511 | 165139376 |
| chr2 | 165222721 | 165223416 |
| chr2 | 165324161 | 165324346 |
| chr2 | 165328581 | 165328756 |
| chr2 | 165613591 | 165613836 |
| chr2 | 165659641 | 165659816 |
| chr2 | 165665121 | 165665246 |
| chr2 | 165687021 | 165687266 |
| chr2 | 165687341 | 165687646 |
| chr2 | 165690971 | 165691086 |
| chr2 | 165706081 | 165706436 |
| chr2 | 165861011 | 165861136 |
| chr2 | 165928511 | 165928856 |
| chr2 | 165938361 | 165938526 |
| chr2 | 165947411 | 165947676 |
| chr2 | 165977321 | 165977506 |
| chr2 | 165979591 | 165979736 |
| chr2 | 165988181 | 165988296 |
| chr2 | 166012091 | 166012456 |
| chr2 | 166012551 | 166012796 |
| chr2 | 166274791 | 166275196 |
| chr2 | 166291221 | 166291516 |
| chr2 | 166336271 | 166336386 |
| chr2 | 166681921 | 166682076 |
| chr2 | 166786171 | 166786296 |
| chr2 | 166819281 | 166819416 |
| chr2 | 166839501 | 166839726 |
| chr2 | 166845201 | 166845376 |
| chr2 | 167031961 | 167032216 |
| chr2 | 167038361 | 167038496 |
| chr2 | 167038671 | 167038816 |
| chr2 | 167050101 | 167050296 |
| chr2 | 167059331 | 167059466 |
| chr2 | 167093681 | 167093806 |
| chr2 | 167140171 | 167140516 |
| chr2 | 167282261 | 167282366 |
| chr2 | 167386841 | 167386996 |
| chr2 | 167388551 | 167388676 |
| chr2 | 167416691 | 167417136 |
| chr2 | 167423321 | 167423566 |
| chr2 | 167447191 | 167447336 |
| chr2 | 167482771 | 167482896 |
| chr2 | 167484331 | 167484526 |
| chr2 | 167511901 | 167512066 |
| chr2 | 167512251 | 167512546 |
| chr2 | 167513021 | 167513376 |

|      |           |           |
|------|-----------|-----------|
| chr2 | 167517841 | 167518186 |
| chr2 | 167518541 | 167518706 |
| chr2 | 167522091 | 167522226 |
| chr2 | 167527851 | 167528156 |
| chr2 | 167548191 | 167548356 |
| chr2 | 167552771 | 167553026 |
| chr2 | 167580561 | 167581306 |
| chr2 | 167582911 | 167583166 |
| chr2 | 167595311 | 167595486 |
| chr2 | 167595741 | 167595926 |
| chr2 | 167600751 | 167601016 |
| chr2 | 167601141 | 167601396 |
| chr2 | 167601431 | 167601686 |
| chr2 | 167602021 | 167602156 |
| chr2 | 167602731 | 167602866 |
| chr2 | 167606961 | 167607236 |
| chr2 | 167623781 | 167624056 |
| chr2 | 167628081 | 167628266 |
| chr2 | 167648491 | 167648706 |
| chr2 | 167649051 | 167649336 |
| chr2 | 167660151 | 167660326 |
| chr2 | 167673331 | 167673586 |
| chr2 | 167675691 | 167675926 |
| chr2 | 167676921 | 167677196 |
| chr2 | 167678831 | 167679026 |
| chr2 | 167682491 | 167682626 |
| chr2 | 167803571 | 167804066 |
| chr2 | 167804191 | 167804466 |
| chr2 | 167905411 | 167905556 |
| chr2 | 167955311 | 167955516 |
| chr2 | 167964851 | 167964966 |
| chr2 | 167973121 | 167973376 |
| chr2 | 167973601 | 167973746 |
| chr2 | 167994441 | 167994696 |
| chr2 | 167997951 | 167998186 |
| chr2 | 169989511 | 169989766 |
| chr2 | 170018611 | 170018966 |
| chr2 | 170038501 | 170038686 |
| chr2 | 170133061 | 170133176 |
| chr2 | 170155051 | 170155216 |
| chr2 | 170168781 | 170169286 |
| chr2 | 170170441 | 170170556 |
| chr2 | 170329621 | 170329736 |
| chr2 | 172294101 | 172294336 |
| chr2 | 172298581 | 172298786 |
| chr2 | 172299331 | 172299616 |
| chr2 | 172849911 | 172850096 |
| chr2 | 172962081 | 172962306 |
| chr2 | 172978871 | 172979086 |
| chr2 | 172984951 | 172985066 |
| chr2 | 172985071 | 172985196 |
| chr2 | 172985251 | 172985586 |
| chr2 | 173097671 | 173097916 |

|      |           |           |
|------|-----------|-----------|
| chr2 | 173127431 | 173127686 |
| chr2 | 173148921 | 173149066 |
| chr2 | 173176971 | 173177206 |
| chr2 | 173451761 | 173451896 |
| chr2 | 173490481 | 173490736 |
| chr2 | 173567521 | 173567656 |
| chr2 | 173588891 | 173589096 |
| chr2 | 173638661 | 173638816 |
| chr2 | 173936211 | 173936636 |
| chr2 | 173941081 | 173941386 |
| chr2 | 174287891 | 174288076 |
| chr2 | 174500031 | 174500186 |
| chr2 | 178145761 | 178146016 |
| chr2 | 178151341 | 178151686 |
| chr2 | 178350061 | 178350206 |
| chr2 | 179670931 | 179671156 |
| chr2 | 179694501 | 179694636 |
| chr2 | 179709501 | 179709676 |
| chr2 | 179762121 | 179762446 |
| chr2 | 179848891 | 179849156 |
| chr2 | 179950061 | 179950186 |
| chr2 | 179994761 | 179994986 |
| chr2 | 180041571 | 180041726 |
| chr2 | 180459901 | 180460096 |
| chr1 | 4819761   | 4819876   |
| chr1 | 9943301   | 9943416   |
| chr1 | 10245611  | 10245796  |
| chr1 | 13142841  | 13143106  |
| chr1 | 13164351  | 13164666  |
| chr1 | 13333191  | 13333336  |
| chr1 | 14064931  | 14065096  |
| chr1 | 14213411  | 14213646  |
| chr1 | 21077571  | 21077726  |
| chr1 | 24756241  | 24756356  |
| chr1 | 24857511  | 24857666  |
| chr1 | 34031351  | 34031486  |
| chr1 | 34075541  | 34075726  |
| chr1 | 34303231  | 34303376  |
| chr1 | 34345731  | 34345896  |
| chr1 | 34351121  | 34351346  |
| chr1 | 34364131  | 34364476  |
| chr1 | 35940061  | 35940216  |
| chr1 | 36174851  | 36175106  |
| chr1 | 36181121  | 36181606  |
| chr1 | 36269571  | 36269756  |
| chr1 | 36530411  | 36530586  |
| chr1 | 36532501  | 36532756  |
| chr1 | 36579921  | 36580076  |
| chr1 | 37357781  | 37357956  |
| chr1 | 37363911  | 37364036  |
| chr1 | 37934691  | 37934946  |
| chr1 | 38351531  | 38351706  |
| chr1 | 38455451  | 38455566  |

|      |          |          |
|------|----------|----------|
| chr1 | 38507391 | 38507686 |
| chr1 | 38568991 | 38569186 |
| chr1 | 38685411 | 38685536 |
| chr1 | 39250041 | 39250276 |
| chr1 | 39344341 | 39344506 |
| chr1 | 39344851 | 39344966 |
| chr1 | 39665921 | 39666136 |
| chr1 | 39727071 | 39727286 |
| chr1 | 39889061 | 39889226 |
| chr1 | 39926501 | 39926646 |
| chr1 | 39963801 | 39964076 |
| chr1 | 39988381 | 39988626 |
| chr1 | 40029421 | 40029566 |
| chr1 | 40245461 | 40245596 |
| chr1 | 40322331 | 40322536 |
| chr1 | 40657621 | 40657826 |
| chr1 | 40929411 | 40929616 |
| chr1 | 42916131 | 42916286 |
| chr1 | 43307421 | 43307586 |
| chr1 | 43524261 | 43524816 |
| chr1 | 51287071 | 51287286 |
| chr1 | 51346571 | 51346756 |
| chr1 | 51594831 | 51595086 |
| chr1 | 51664181 | 51664476 |
| chr1 | 51947151 | 51947396 |
| chr1 | 51964951 | 51965126 |
| chr1 | 52206931 | 52207156 |
| chr1 | 52211731 | 52211986 |
| chr1 | 52673891 | 52674096 |
| chr1 | 54859671 | 54859776 |
| chr1 | 54894641 | 54894936 |
| chr1 | 54924441 | 54924636 |
| chr1 | 54953351 | 54953586 |
| chr1 | 54954111 | 54954366 |
| chr1 | 54963721 | 54963876 |
| chr1 | 58128051 | 58128276 |
| chr1 | 58170951 | 58171176 |
| chr1 | 58360251 | 58360506 |
| chr1 | 58360621 | 58360746 |
| chr1 | 58476861 | 58477086 |
| chr1 | 58780621 | 58780736 |
| chr1 | 60621621 | 60621846 |
| chr1 | 60726341 | 60726596 |
| chr1 | 60727011 | 60727206 |
| chr1 | 60866401 | 60866676 |
| chr1 | 63136721 | 63136946 |
| chr1 | 63237501 | 63237766 |
| chr1 | 63453361 | 63453506 |
| chr1 | 63526211 | 63526406 |
| chr1 | 64722801 | 64722916 |
| chr1 | 65111341 | 65111566 |
| chr1 | 69658041 | 69658176 |
| chr1 | 71703371 | 71703516 |



|      |          |          |
|------|----------|----------|
| chr1 | 71942731 | 71942926 |
| chr1 | 71943121 | 71943406 |
| chr1 | 71991171 | 71991376 |
| chr1 | 72324281 | 72324476 |
| chr1 | 72797501 | 72797616 |
| chr1 | 72879801 | 72879986 |
| chr1 | 73976491 | 73976586 |
| chr1 | 73990321 | 73990526 |
| chr1 | 74012461 | 74013216 |
| chr1 | 74048071 | 74048356 |
| chr1 | 74060001 | 74060326 |
| chr1 | 74063951 | 74064156 |
| chr1 | 74064921 | 74065046 |
| chr1 | 74068191 | 74068336 |
| chr1 | 74071711 | 74071966 |
| chr1 | 74073311 | 74073436 |
| chr1 | 74095891 | 74096066 |
| chr1 | 74116241 | 74116616 |
| chr1 | 74117191 | 74117316 |
| chr1 | 74126081 | 74126346 |
| chr1 | 74126441 | 74126596 |
| chr1 | 74128361 | 74128606 |
| chr1 | 74128881 | 74129106 |
| chr1 | 74129281 | 74129446 |
| chr1 | 74138871 | 74139276 |
| chr1 | 74139841 | 74140066 |
| chr1 | 74153461 | 74153586 |
| chr1 | 74180871 | 74180996 |
| chr1 | 74348861 | 74349096 |
| chr1 | 74386521 | 74386616 |
| chr1 | 75062431 | 75062746 |
| chr1 | 75248171 | 75248316 |
| chr1 | 75282131 | 75282266 |
| chr1 | 75282451 | 75282566 |
| chr1 | 75371701 | 75371826 |
| chr1 | 78335031 | 78335146 |
| chr1 | 78427331 | 78427456 |
| chr1 | 78644071 | 78644246 |
| chr1 | 78701621 | 78701836 |
| chr1 | 79819841 | 79819976 |
| chr1 | 81672011 | 81672216 |
| chr1 | 81741941 | 81742136 |
| chr1 | 82147501 | 82147756 |
| chr1 | 82244291 | 82244406 |
| chr1 | 82251601 | 82251736 |
| chr1 | 82254941 | 82255196 |
| chr1 | 84222571 | 84222756 |
| chr1 | 84834261 | 84834566 |
| chr1 | 88139941 | 88140116 |
| chr1 | 88277891 | 88278146 |
| chr1 | 88303741 | 88303886 |
| chr1 | 88344031 | 88344206 |
| chr1 | 89170081 | 89170266 |

|      |           |           |
|------|-----------|-----------|
| chr1 | 89331391  | 89331606  |
| chr1 | 90174621  | 90174846  |
| chr1 | 90174861  | 90175116  |
| chr1 | 90176221  | 90176416  |
| chr1 | 90176901  | 90176996  |
| chr1 | 90181281  | 90181426  |
| chr1 | 90266831  | 90266966  |
| chr1 | 90969141  | 90969286  |
| chr1 | 91000811  | 91001166  |
| chr1 | 91028521  | 91028686  |
| chr1 | 91030171  | 91030296  |
| chr1 | 91032881  | 91033106  |
| chr1 | 91047661  | 91047956  |
| chr1 | 91068181  | 91068436  |
| chr1 | 91436751  | 91436866  |
| chr1 | 91483821  | 91483936  |
| chr1 | 91918581  | 91918716  |
| chr1 | 92233651  | 92233846  |
| chr1 | 92634081  | 92634206  |
| chr1 | 92637241  | 92637526  |
| chr1 | 92637691  | 92637976  |
| chr1 | 92640061  | 92640176  |
| chr1 | 92686321  | 92686576  |
| chr1 | 92720281  | 92720526  |
| chr1 | 92913721  | 92913936  |
| chr1 | 92936901  | 92937306  |
| chr1 | 93310431  | 93310686  |
| chr1 | 93342641  | 93342776  |
| chr1 | 93342811  | 93342986  |
| chr1 | 93352401  | 93352846  |
| chr1 | 93352951  | 93353096  |
| chr1 | 93492281  | 93492456  |
| chr1 | 93721131  | 93721316  |
| chr1 | 93754251  | 93754386  |
| chr1 | 93757601  | 93757846  |
| chr1 | 93775111  | 93775286  |
| chr1 | 93802091  | 93802346  |
| chr1 | 94113461  | 94113586  |
| chr1 | 94711141  | 94711326  |
| chr1 | 95107721  | 95107876  |
| chr1 | 95122551  | 95122726  |
| chr1 | 95262111  | 95262356  |
| chr1 | 95583231  | 95583686  |
| chr1 | 95585071  | 95585436  |
| chr1 | 97317691  | 97317846  |
| chr1 | 99549231  | 99549346  |
| chr1 | 99819181  | 99819426  |
| chr1 | 107909491 | 107909616 |
| chr1 | 120201531 | 120201666 |
| chr1 | 120751301 | 120751426 |
| chr1 | 120797081 | 120797376 |
| chr1 | 120798391 | 120798566 |
| chr1 | 120877811 | 120878036 |

|      |           |           |
|------|-----------|-----------|
| chr1 | 120898181 | 120898416 |
| chr1 | 120952911 | 120953176 |
| chr1 | 121190591 | 121190846 |
| chr1 | 121391481 | 121391596 |
| chr1 | 121893171 | 121893566 |
| chr1 | 121997181 | 121997436 |
| chr1 | 122008611 | 122008866 |
| chr1 | 122014741 | 122015026 |
| chr1 | 123187241 | 123187496 |
| chr1 | 123287071 | 123287346 |
| chr1 | 127287181 | 127287326 |
| chr1 | 127410801 | 127410996 |
| chr1 | 128725781 | 128725976 |
| chr1 | 129128191 | 129128316 |
| chr1 | 129166401 | 129166576 |
| chr1 | 129166881 | 129167026 |
| chr1 | 129167371 | 129167506 |
| chr1 | 129235831 | 129235946 |
| chr1 | 129277561 | 129277816 |
| chr1 | 129751121 | 129751246 |
| chr1 | 132612061 | 132612346 |
| chr1 | 132620841 | 132621066 |
| chr1 | 132981001 | 132981156 |
| chr1 | 132983361 | 132983476 |
| chr1 | 133095131 | 133095316 |
| chr1 | 133106591 | 133106716 |
| chr1 | 133385901 | 133386046 |
| chr1 | 133814211 | 133814436 |
| chr1 | 133884001 | 133884166 |
| chr1 | 133886381 | 133886626 |
| chr1 | 134988121 | 134988366 |
| chr1 | 135033011 | 135033116 |
| chr1 | 135080261 | 135080416 |
| chr1 | 135123651 | 135123936 |
| chr1 | 135182551 | 135182766 |
| chr1 | 135638311 | 135638466 |
| chr1 | 135717091 | 135717316 |
| chr1 | 135814451 | 135814596 |
| chr1 | 135831051 | 135831166 |
| chr1 | 135861981 | 135862106 |
| chr1 | 135862111 | 135862236 |
| chr1 | 135968321 | 135968456 |
| chr1 | 135988901 | 135989076 |
| chr1 | 135990441 | 135990576 |
| chr1 | 136410671 | 136410856 |
| chr1 | 136535461 | 136535586 |
| chr1 | 136649221 | 136649616 |
| chr1 | 136652461 | 136652716 |
| chr1 | 136670331 | 136670516 |
| chr1 | 136851231 | 136851446 |
| chr1 | 137083121 | 137083346 |
| chr1 | 137095521 | 137095746 |
| chr1 | 137358921 | 137359086 |

|      |           |           |
|------|-----------|-----------|
| chr1 | 137369371 | 137369516 |
| chr1 | 137411871 | 137412136 |
| chr1 | 137445241 | 137445396 |
| chr1 | 137541601 | 137541886 |
| chr1 | 137568741 | 137568996 |
| chr1 | 137569211 | 137569386 |
| chr1 | 137575641 | 137575896 |
| chr1 | 137590541 | 137590676 |
| chr1 | 137640351 | 137640606 |
| chr1 | 138276611 | 138276896 |
| chr1 | 140404931 | 140405106 |
| chr1 | 140438601 | 140438756 |
| chr1 | 140478841 | 140479056 |
| chr1 | 140798351 | 140798606 |
| chr1 | 140803371 | 140803496 |
| chr1 | 140918791 | 140918916 |
| chr1 | 145846761 | 145847026 |
| chr1 | 152382871 | 152383016 |
| chr1 | 153092551 | 153092726 |
| chr1 | 153342001 | 153342306 |
| chr1 | 153466671 | 153466806 |
| chr1 | 153702951 | 153703116 |
| chr1 | 153808371 | 153808596 |
| chr1 | 154451481 | 154451756 |
| chr1 | 154861421 | 154861546 |
| chr1 | 154861651 | 154861906 |
| chr1 | 154941981 | 154942156 |
| chr1 | 154983771 | 154983986 |
| chr1 | 154992981 | 154993236 |
| chr1 | 155000891 | 155001116 |
| chr1 | 155001341 | 155001876 |
| chr1 | 155073401 | 155073586 |
| chr1 | 155115021 | 155115236 |
| chr1 | 155162371 | 155162466 |
| chr1 | 155164721 | 155165176 |
| chr1 | 155168561 | 155168786 |
| chr1 | 155324011 | 155324186 |
| chr1 | 155750281 | 155750406 |
| chr1 | 155752151 | 155752286 |
| chr1 | 155833741 | 155833866 |
| chr1 | 155996041 | 155996356 |
| chr1 | 156911391 | 156911626 |
| chr1 | 156970161 | 156970306 |
| chr1 | 157300501 | 157300686 |
| chr1 | 157642571 | 157642926 |
| chr1 | 157645481 | 157645636 |
| chr1 | 157710281 | 157710416 |
| chr1 | 157850951 | 157851206 |
| chr1 | 158452161 | 158452336 |
| chr1 | 158585251 | 158585666 |
| chr1 | 158590331 | 158590506 |
| chr1 | 158590901 | 158590986 |
| chr1 | 158606541 | 158606756 |

|      |           |           |
|------|-----------|-----------|
| chr1 | 158712051 | 158712306 |
| chr1 | 159011121 | 159011246 |
| chr1 | 161168431 | 161168686 |
| chr1 | 163198301 | 163198436 |
| chr1 | 163907151 | 163907376 |
| chr1 | 163913581 | 163913746 |
| chr1 | 164133101 | 164133326 |
| chr1 | 164233141 | 164233256 |
| chr1 | 164590431 | 164590786 |
| chr1 | 164590801 | 164590996 |
| chr1 | 165488141 | 165488446 |
| chr1 | 166166191 | 166166536 |
| chr1 | 166423171 | 166423326 |
| chr1 | 166516451 | 166516636 |
| chr1 | 166696651 | 166697026 |
| chr1 | 166826301 | 166826546 |
| chr1 | 166829251 | 166829466 |
| chr1 | 167124071 | 167124366 |
| chr1 | 167395831 | 167395976 |
| chr1 | 167547241 | 167547496 |
| chr1 | 168314911 | 168315026 |
| chr1 | 168830851 | 168830996 |
| chr1 | 169311591 | 169311816 |
| chr1 | 169352851 | 169353176 |
| chr1 | 170275091 | 170275516 |
| chr1 | 170310721 | 170310906 |
| chr1 | 170471041 | 170471256 |
| chr1 | 171737311 | 171737446 |
| chr1 | 171999431 | 171999566 |
| chr1 | 172620101 | 172620336 |
| chr1 | 172624911 | 172625116 |
| chr1 | 172625451 | 172625696 |
| chr1 | 172629671 | 172629926 |
| chr1 | 172677991 | 172678156 |
| chr1 | 173204251 | 173204526 |
| chr1 | 173261041 | 173261226 |
| chr1 | 173274161 | 173274446 |
| chr1 | 173368401 | 173368566 |
| chr1 | 173383141 | 173383246 |
| chr1 | 173511641 | 173511786 |
| chr1 | 178913031 | 178913266 |
| chr1 | 179373711 | 179373996 |
| chr1 | 180260181 | 180260446 |
| chr1 | 180464311 | 180464556 |
| chr1 | 181067011 | 181067216 |
| chr1 | 181278731 | 181278856 |
| chr1 | 181291901 | 181292126 |
| chr1 | 181487111 | 181487266 |
| chr1 | 181599051 | 181599166 |
| chr1 | 182117591 | 182117726 |
| chr1 | 182151051 | 182151306 |
| chr1 | 182273331 | 182273486 |
| chr1 | 182273891 | 182274316 |

|      |           |           |
|------|-----------|-----------|
| chr1 | 182320841 | 182320986 |
| chr1 | 182351051 | 182351306 |
| chr1 | 182553331 | 182553656 |
| chr1 | 182569741 | 182569926 |
| chr1 | 182706811 | 182707016 |
| chr1 | 182873361 | 182873696 |
| chr1 | 183186941 | 183187146 |
| chr1 | 183350221 | 183350336 |
| chr1 | 183385391 | 183385536 |
| chr1 | 183811591 | 183811826 |
| chr1 | 184033631 | 184033766 |
| chr1 | 184038491 | 184038856 |
| chr1 | 184201931 | 184202176 |
| chr1 | 184210271 | 184210566 |
| chr1 | 184210711 | 184210936 |
| chr1 | 184371811 | 184372016 |
| chr1 | 184424761 | 184424946 |
| chr1 | 184612271 | 184612426 |
| chr1 | 184889301 | 184889586 |
| chr1 | 185398991 | 185399146 |
| chr1 | 186360041 | 186360336 |
| chr1 | 186554781 | 186554896 |
| chr1 | 186630881 | 186631036 |
| chr1 | 186631521 | 186631856 |
| chr1 | 186635051 | 186635236 |
| chr1 | 186653771 | 186654316 |
| chr1 | 186732621 | 186732786 |
| chr1 | 186893931 | 186894276 |
| chr1 | 187075581 | 187075706 |
| chr1 | 187077261 | 187077436 |
| chr1 | 187106761 | 187106996 |
| chr1 | 188332221 | 188332396 |
| chr1 | 188363231 | 188363366 |
| chr1 | 188425081 | 188425286 |
| chr1 | 188491691 | 188492006 |
| chr1 | 189050691 | 189050856 |
| chr1 | 189065251 | 189065406 |
| chr1 | 189188091 | 189188246 |
| chr1 | 190065801 | 190065936 |
| chr1 | 191041561 | 191041676 |
| chr1 | 191554291 | 191554836 |
| chr1 | 191580591 | 191580746 |
| chr1 | 191641591 | 191641846 |
| chr1 | 191653011 | 191653336 |
| chr1 | 191698121 | 191698316 |
| chr1 | 191725731 | 191726166 |
| chr1 | 191734821 | 191735006 |
| chr1 | 192723241 | 192723506 |
| chr1 | 192925971 | 192926106 |
| chr1 | 193164301 | 193164436 |
| chr1 | 193191011 | 193191276 |
| chr1 | 193269451 | 193269596 |
| chr1 | 193319101 | 193319466 |

|      |           |           |
|------|-----------|-----------|
| chr1 | 193616331 | 193616526 |
| chr1 | 193626321 | 193626436 |
| chr1 | 193626441 | 193626566 |
| chr1 | 193770241 | 193770496 |
| chr1 | 194560931 | 194561086 |
| chr1 | 194583071 | 194583276 |
| chr1 | 194644661 | 194644856 |
| chr1 | 194916141 | 194916386 |
| chr1 | 195078581 | 195078706 |
| chr1 | 195097531 | 195097746 |
| chr1 | 195100671 | 195100926 |
| chr1 | 195153021 | 195153216 |
| chr1 | 196843351 | 196843696 |
| chr9 | 7961451   | 7961576   |
| chr9 | 9040931   | 9041286   |
| chr9 | 14153791  | 14153966  |
| chr9 | 14420111  | 14420366  |
| chr9 | 15308741  | 15308996  |
| chr9 | 20609631  | 20609806  |
| chr9 | 20988741  | 20988926  |
| chr9 | 21029401  | 21029576  |
| chr9 | 21082421  | 21082596  |
| chr9 | 21083461  | 21083796  |
| chr9 | 21131721  | 21131836  |
| chr9 | 21234471  | 21234616  |
| chr9 | 21530191  | 21530416  |
| chr9 | 21545051  | 21545226  |
| chr9 | 21614871  | 21615186  |
| chr9 | 21635021  | 21635176  |
| chr9 | 21635181  | 21635336  |
| chr9 | 21635641  | 21635756  |
| chr9 | 21635761  | 21636036  |
| chr9 | 21636101  | 21636306  |
| chr9 | 21639811  | 21640106  |
| chr9 | 21935651  | 21935776  |
| chr9 | 21941571  | 21941836  |
| chr9 | 22172541  | 22172696  |
| chr9 | 22513271  | 22513456  |
| chr9 | 22513601  | 22513716  |
| chr9 | 22514211  | 22514376  |
| chr9 | 22553301  | 22553456  |
| chr9 | 22598731  | 22598876  |
| chr9 | 22629481  | 22629616  |
| chr9 | 22930321  | 22930516  |
| chr9 | 22932221  | 22932386  |
| chr9 | 22965921  | 22966086  |
| chr9 | 22975241  | 22975426  |
| chr9 | 23050401  | 23050536  |
| chr9 | 23050691  | 23050866  |
| chr9 | 23050981  | 23051136  |
| chr9 | 23187871  | 23188126  |
| chr9 | 23241541  | 23241696  |
| chr9 | 25358101  | 25358356  |

|      |          |          |
|------|----------|----------|
| chr9 | 30659871 | 30659996 |
| chr9 | 30722601 | 30722856 |
| chr9 | 30727371 | 30727566 |
| chr9 | 30736591 | 30736996 |
| chr9 | 30989361 | 30989476 |
| chr9 | 31226841 | 31226976 |
| chr9 | 32642981 | 32643236 |
| chr9 | 32778931 | 32779186 |
| chr9 | 33741771 | 33741966 |
| chr9 | 34730851 | 34730956 |
| chr9 | 34852921 | 34853176 |
| chr9 | 34913911 | 34914326 |
| chr9 | 34919811 | 34920056 |
| chr9 | 34945851 | 34945956 |
| chr9 | 34970541 | 34970856 |
| chr9 | 34996261 | 34996776 |
| chr9 | 35232421 | 35232646 |
| chr9 | 35251201 | 35251446 |
| chr9 | 35384411 | 35384536 |
| chr9 | 40101901 | 40102086 |
| chr9 | 40107531 | 40107646 |
| chr9 | 40125261 | 40125406 |
| chr9 | 40126651 | 40126786 |
| chr9 | 40127041 | 40127176 |
| chr9 | 40127511 | 40127736 |
| chr9 | 40138601 | 40139036 |
| chr9 | 40498481 | 40498736 |
| chr9 | 40508141 | 40508596 |
| chr9 | 40557051 | 40557186 |
| chr9 | 40799541 | 40799836 |
| chr9 | 41527011 | 41527116 |
| chr9 | 41626221 | 41626366 |
| chr9 | 41748601 | 41748776 |
| chr9 | 41934791 | 41935016 |
| chr9 | 42564931 | 42565076 |
| chr9 | 42766551 | 42766796 |
| chr9 | 42787301 | 42787536 |
| chr9 | 42881011 | 42881176 |
| chr9 | 42881291 | 42881546 |
| chr9 | 43134511 | 43134726 |
| chr9 | 43789401 | 43789556 |
| chr9 | 43797681 | 43797796 |
| chr9 | 43886561 | 43887106 |
| chr9 | 43912821 | 43913086 |
| chr9 | 43938861 | 43938996 |
| chr9 | 43941831 | 43942156 |
| chr9 | 43942291 | 43942536 |
| chr9 | 43984031 | 43984186 |
| chr9 | 44096771 | 44097156 |
| chr9 | 44293891 | 44294126 |
| chr9 | 44298831 | 44299076 |
| chr9 | 44312951 | 44313266 |
| chr9 | 44316971 | 44317146 |



|      |          |          |
|------|----------|----------|
| chr9 | 44317901 | 44318256 |
| chr9 | 44318301 | 44318546 |
| chr9 | 44320351 | 44320496 |
| chr9 | 44321421 | 44321676 |
| chr9 | 44519361 | 44519536 |
| chr9 | 44525871 | 44526156 |
| chr9 | 44526761 | 44527006 |
| chr9 | 44530631 | 44530866 |
| chr9 | 44531691 | 44531886 |
| chr9 | 44621861 | 44621976 |
| chr9 | 45603331 | 45603546 |
| chr9 | 45657801 | 45658086 |
| chr9 | 45831781 | 45832076 |
| chr9 | 45836201 | 45836576 |
| chr9 | 45845141 | 45845386 |
| chr9 | 45848161 | 45848326 |
| chr9 | 45857661 | 45857776 |
| chr9 | 45897171 | 45897516 |
| chr9 | 45971191 | 45971386 |
| chr9 | 46022901 | 46023136 |
| chr9 | 46023171 | 46023846 |
| chr9 | 48075231 | 48075446 |
| chr9 | 48313341 | 48313496 |
| chr9 | 48477981 | 48478206 |
| chr9 | 48487171 | 48487336 |
| chr9 | 48543751 | 48543936 |
| chr9 | 48562061 | 48562176 |
| chr9 | 48630511 | 48630766 |
| chr9 | 48643781 | 48643906 |
| chr9 | 49808411 | 49808596 |
| chr9 | 50335021 | 50335216 |
| chr9 | 50405281 | 50405526 |
| chr9 | 50616741 | 50616866 |
| chr9 | 50617591 | 50617756 |
| chr9 | 50650861 | 50650996 |
| chr9 | 50662391 | 50662536 |
| chr9 | 50668381 | 50668636 |
| chr9 | 50673241 | 50673366 |
| chr9 | 50683191 | 50683626 |
| chr9 | 50692371 | 50692596 |
| chr9 | 50696571 | 50696766 |
| chr9 | 50799371 | 50799496 |
| chr9 | 51794081 | 51794196 |
| chr9 | 51901851 | 51902076 |
| chr9 | 52749011 | 52749126 |
| chr9 | 52749151 | 52749536 |
| chr9 | 53325771 | 53325896 |
| chr9 | 54397571 | 54397766 |
| chr9 | 54444631 | 54444756 |
| chr9 | 54451061 | 54451336 |
| chr9 | 55068231 | 55068476 |
| chr9 | 55271911 | 55272166 |
| chr9 | 55962821 | 55963106 |

|      |          |          |
|------|----------|----------|
| chr9 | 56709761 | 56709966 |
| chr9 | 56984531 | 56984776 |
| chr9 | 57095811 | 57096206 |
| chr9 | 57101871 | 57102126 |
| chr9 | 57106681 | 57106936 |
| chr9 | 57129461 | 57129716 |
| chr9 | 57143681 | 57143816 |
| chr9 | 57395321 | 57395546 |
| chr9 | 57395741 | 57395966 |
| chr9 | 57461741 | 57461966 |
| chr9 | 57472111 | 57472416 |
| chr9 | 57491591 | 57491716 |
| chr9 | 57610561 | 57610716 |
| chr9 | 57736051 | 57736176 |
| chr9 | 58143901 | 58144136 |
| chr9 | 58513421 | 58513546 |
| chr9 | 59339671 | 59339786 |
| chr9 | 59522071 | 59522206 |
| chr9 | 59580741 | 59580876 |
| chr9 | 59580891 | 59581316 |
| chr9 | 60050281 | 60050476 |
| chr9 | 60642971 | 60643096 |
| chr9 | 60881311 | 60881486 |
| chr9 | 60903051 | 60903236 |
| chr9 | 61146641 | 61146786 |
| chr9 | 61224231 | 61224436 |
| chr9 | 61245301 | 61245666 |
| chr9 | 61249501 | 61249826 |
| chr9 | 61249951 | 61250146 |
| chr9 | 61261841 | 61261996 |
| chr9 | 61303481 | 61303716 |
| chr9 | 61737951 | 61738036 |
| chr9 | 61877051 | 61877246 |
| chr9 | 62202971 | 62203106 |
| chr9 | 62206231 | 62206586 |
| chr9 | 62214861 | 62215216 |
| chr9 | 62215461 | 62215576 |
| chr9 | 62215741 | 62215936 |
| chr9 | 62217541 | 62217666 |
| chr9 | 62222721 | 62222846 |
| chr9 | 62228281 | 62228446 |
| chr9 | 62283951 | 62284186 |
| chr9 | 62939081 | 62939456 |
| chr9 | 63048481 | 63048856 |
| chr9 | 63193871 | 63194126 |
| chr9 | 63498731 | 63499046 |
| chr9 | 63501901 | 63502066 |
| chr9 | 63506041 | 63506676 |
| chr9 | 63514471 | 63514626 |
| chr9 | 63559211 | 63559326 |
| chr9 | 63589841 | 63589956 |
| chr9 | 63591041 | 63591136 |
| chr9 | 63591161 | 63591286 |

|      |          |          |
|------|----------|----------|
| chr9 | 63594131 | 63594476 |
| chr9 | 63817521 | 63817756 |
| chr9 | 63818471 | 63818596 |
| chr9 | 63821101 | 63821356 |
| chr9 | 63836681 | 63836916 |
| chr9 | 63837011 | 63837246 |
| chr9 | 63837481 | 63837696 |
| chr9 | 63845371 | 63845496 |
| chr9 | 63970631 | 63970926 |
| chr9 | 64779571 | 64779666 |
| chr9 | 65026501 | 65026666 |
| chr9 | 65062861 | 65062996 |
| chr9 | 65223241 | 65223706 |
| chr9 | 65228781 | 65228896 |
| chr9 | 65248501 | 65248736 |
| chr9 | 65252891 | 65253166 |
| chr9 | 65317721 | 65318006 |
| chr9 | 65572681 | 65572866 |
| chr9 | 66716701 | 66716866 |
| chr9 | 66760771 | 66760896 |
| chr9 | 66805161 | 66805436 |
| chr9 | 67271931 | 67272216 |
| chr9 | 67381221 | 67381396 |
| chr9 | 67694931 | 67695156 |
| chr9 | 67695231 | 67695446 |
| chr9 | 67713311 | 67713566 |
| chr9 | 67717601 | 67717946 |
| chr9 | 67718031 | 67718186 |
| chr9 | 68638481 | 68638646 |
| chr9 | 69219201 | 69219386 |
| chr9 | 69325051 | 69325316 |
| chr9 | 69839831 | 69840066 |
| chr9 | 70166791 | 70166946 |
| chr9 | 70173881 | 70174046 |
| chr9 | 71527381 | 71527516 |
| chr9 | 71673721 | 71673946 |
| chr9 | 72031321 | 72031446 |
| chr9 | 72031981 | 72032146 |
| chr9 | 72513221 | 72513326 |
| chr9 | 72523591 | 72523846 |
| chr9 | 72541161 | 72541516 |
| chr9 | 72541771 | 72541906 |
| chr9 | 72541911 | 72542176 |
| chr9 | 72559691 | 72559946 |
| chr9 | 72729101 | 72729326 |
| chr9 | 72729531 | 72729696 |
| chr9 | 72867871 | 72867956 |
| chr9 | 74857311 | 74857436 |
| chr9 | 75195461 | 75195556 |
| chr9 | 75195601 | 75196016 |
| chr9 | 75196201 | 75196416 |
| chr9 | 75211101 | 75211276 |
| chr9 | 75232921 | 75233086 |

|      |           |           |
|------|-----------|-----------|
| chr9 | 75248651  | 75248806  |
| chr9 | 75249961  | 75250166  |
| chr9 | 75252201  | 75252436  |
| chr9 | 75279141  | 75279306  |
| chr9 | 75680391  | 75680586  |
| chr9 | 77769021  | 77769136  |
| chr9 | 77769241  | 77769526  |
| chr9 | 77801201  | 77801456  |
| chr9 | 77802321  | 77802526  |
| chr9 | 77866201  | 77866366  |
| chr9 | 78038531  | 78038676  |
| chr9 | 79562391  | 79562616  |
| chr9 | 83004181  | 83004436  |
| chr9 | 83773461  | 83773666  |
| chr9 | 83881881  | 83882066  |
| chr9 | 83926101  | 83926506  |
| chr9 | 83926511  | 83926786  |
| chr9 | 83931061  | 83931226  |
| chr9 | 85510211  | 85510456  |
| chr9 | 86247971  | 86248136  |
| chr9 | 86551861  | 86551996  |
| chr9 | 87513331  | 87513576  |
| chr9 | 88252741  | 88252896  |
| chr9 | 88420991  | 88421176  |
| chr9 | 92443661  | 92443826  |
| chr9 | 92443911  | 92444096  |
| chr9 | 95081581  | 95081836  |
| chr9 | 95169561  | 95169806  |
| chr9 | 95405881  | 95406076  |
| chr9 | 96021031  | 96021166  |
| chr9 | 96030281  | 96030586  |
| chr9 | 96046221  | 96046366  |
| chr9 | 96101821  | 96102016  |
| chr9 | 96230491  | 96230626  |
| chr9 | 96283951  | 96284286  |
| chr9 | 96305371  | 96305636  |
| chr9 | 96307011  | 96307216  |
| chr9 | 96591951  | 96592096  |
| chr9 | 96602581  | 96602836  |
| chr9 | 96628211  | 96628646  |
| chr9 | 96628961  | 96629126  |
| chr9 | 96629301  | 96629556  |
| chr9 | 96652981  | 96653216  |
| chr9 | 96656201  | 96656376  |
| chr9 | 96656461  | 96656756  |
| chr9 | 96691681  | 96691836  |
| chr9 | 98329611  | 98329766  |
| chr9 | 99071851  | 99072046  |
| chr9 | 100388721 | 100388846 |
| chr9 | 100887071 | 100887326 |
| chr9 | 100908091 | 100908306 |
| chr9 | 101164161 | 101164276 |
| chr9 | 101208691 | 101208936 |

|      |           |           |
|------|-----------|-----------|
| chr9 | 102638761 | 102638956 |
| chr9 | 102641701 | 102641896 |
| chr9 | 102710421 | 102710526 |
| chr9 | 102767381 | 102767496 |
| chr9 | 102934231 | 102934566 |
| chr9 | 102979451 | 102979686 |
| chr9 | 103088421 | 103088546 |
| chr9 | 103088631 | 103088756 |
| chr9 | 103088771 | 103089016 |
| chr9 | 103132981 | 103133216 |
| chr9 | 103990591 | 103990726 |
| chr9 | 104136931 | 104137046 |
| chr9 | 105639701 | 105640156 |
| chr9 | 106104521 | 106104676 |
| chr9 | 106139881 | 106140136 |
| chr9 | 106145401 | 106145546 |
| chr9 | 106148731 | 106148876 |
| chr9 | 106203051 | 106203276 |
| chr9 | 106220731 | 106221076 |
| chr9 | 106284021 | 106284206 |
| chr9 | 106285561 | 106285676 |
| chr9 | 106595571 | 106595796 |
| chr9 | 107185471 | 107185636 |
| chr9 | 107199061 | 107199366 |
| chr9 | 107230831 | 107231096 |
| chr9 | 107470441 | 107470566 |
| chr9 | 107521481 | 107521596 |
| chr9 | 107606911 | 107607126 |
| chr9 | 107659511 | 107659666 |
| chr9 | 107811361 | 107811526 |
| chr9 | 108164631 | 108164846 |
| chr9 | 108363811 | 108364066 |
| chr9 | 108481281 | 108481606 |
| chr9 | 108489871 | 108490006 |
| chr9 | 108755061 | 108755196 |
| chr9 | 108762571 | 108762946 |
| chr9 | 108851031 | 108851156 |
| chr9 | 108909011 | 108909266 |
| chr9 | 108911621 | 108911906 |
| chr9 | 109921771 | 109922106 |
| chr9 | 109973011 | 109973506 |
| chr9 | 109986841 | 109987046 |
| chr9 | 110248011 | 110248186 |
| chr9 | 110315781 | 110315976 |
| chr9 | 110421581 | 110421756 |
| chr9 | 110483921 | 110484106 |
| chr9 | 110525801 | 110525916 |
| chr9 | 110576041 | 110576256 |
| chr9 | 110781601 | 110781846 |
| chr9 | 114311031 | 114311266 |
| chr9 | 114364281 | 114364546 |
| chr9 | 114513711 | 114513826 |
| chr9 | 114985821 | 114985936 |

|      |           |           |
|------|-----------|-----------|
| chr9 | 115170531 | 115170826 |
| chr9 | 115993961 | 115994106 |
| chr9 | 116014071 | 116014266 |
| chr9 | 116082921 | 116083226 |
| chr9 | 116096261 | 116096506 |
| chr9 | 116230051 | 116230246 |
| chr9 | 116375481 | 116375676 |
| chr9 | 116711751 | 116711896 |
| chr9 | 116810301 | 116810516 |
| chr9 | 116926281 | 116926406 |
| chr9 | 117143961 | 117144216 |
| chr9 | 118861001 | 118861196 |
| chr9 | 118861611 | 118861896 |
| chr9 | 118903381 | 118903636 |
| chr9 | 118914041 | 118914286 |
| chr9 | 118914371 | 118914736 |
| chr9 | 118934321 | 118934576 |
| chr9 | 118937181 | 118937266 |
| chr9 | 118937711 | 118937966 |
| chr9 | 118938761 | 118938996 |
| chr9 | 118997871 | 118998116 |
| chr9 | 119185751 | 119185966 |
| chr9 | 119239421 | 119239656 |
| chr9 | 119252301 | 119252446 |
| chr9 | 119343561 | 119343706 |
| chr9 | 119843861 | 119844006 |
| chr9 | 119886551 | 119886686 |
| chr9 | 119893241 | 119893506 |
| chr9 | 120060111 | 120060326 |
| chr9 | 121238231 | 121238736 |
| chr9 | 121261571 | 121261826 |
| chr9 | 121265931 | 121266176 |
| chr9 | 121267451 | 121267726 |
| chr9 | 121276531 | 121276676 |
| chr9 | 121289771 | 121289906 |
| chr9 | 121290121 | 121290256 |
| chr9 | 121290881 | 121291136 |
| chr9 | 121291191 | 121291906 |
| chr9 | 121292581 | 121292756 |
| chr9 | 121295321 | 121295576 |
| chr9 | 121313871 | 121314116 |
| chr9 | 121324621 | 121324756 |
| chr9 | 121325351 | 121325676 |
| chr9 | 121342941 | 121343196 |
| chr9 | 122223601 | 122223806 |
| chr9 | 122263891 | 122263996 |
| chr9 | 123001591 | 123001856 |
| chr9 | 123401401 | 123401516 |
| chr8 | 3211401   | 3211606   |
| chr8 | 3220141   | 3220296   |
| chr8 | 3275231   | 3275486   |
| chr8 | 3275891   | 3276076   |
| chr8 | 3280331   | 3280516   |

|      |          |          |
|------|----------|----------|
| chr8 | 3413941  | 3414056  |
| chr8 | 3600391  | 3600626  |
| chr8 | 3645291  | 3645476  |
| chr8 | 3654791  | 3654956  |
| chr8 | 8335661  | 8335876  |
| chr8 | 10814471 | 10814606 |
| chr8 | 10911271 | 10911646 |
| chr8 | 10927851 | 10928226 |
| chr8 | 10978331 | 10978826 |
| chr8 | 10990761 | 10991096 |
| chr8 | 11005371 | 11005626 |
| chr8 | 11276291 | 11276426 |
| chr8 | 11279411 | 11279746 |
| chr8 | 11333451 | 11333706 |
| chr8 | 11369321 | 11370226 |
| chr8 | 11376261 | 11376816 |
| chr8 | 11380711 | 11380956 |
| chr8 | 11396161 | 11396486 |
| chr8 | 11396791 | 11396906 |
| chr8 | 11397321 | 11397436 |
| chr8 | 11397471 | 11397766 |
| chr8 | 11399971 | 11400106 |
| chr8 | 11412651 | 11412806 |
| chr8 | 11418461 | 11418586 |
| chr8 | 11418951 | 11419216 |
| chr8 | 11464241 | 11464596 |
| chr8 | 11530221 | 11530466 |
| chr8 | 11730561 | 11730716 |
| chr8 | 11819501 | 11819726 |
| chr8 | 11831111 | 11831286 |
| chr8 | 12711511 | 12711686 |
| chr8 | 12759801 | 12759946 |
| chr8 | 12825101 | 12825706 |
| chr8 | 12825781 | 12826036 |
| chr8 | 13176981 | 13177166 |
| chr8 | 13179961 | 13180196 |
| chr8 | 13180311 | 13180676 |
| chr8 | 13180851 | 13181256 |
| chr8 | 13181491 | 13181616 |
| chr8 | 13204861 | 13205176 |
| chr8 | 13209701 | 13209826 |
| chr8 | 13394551 | 13394736 |
| chr8 | 13460911 | 13461386 |
| chr8 | 13492971 | 13493376 |
| chr8 | 13515931 | 13516386 |
| chr8 | 13572471 | 13572596 |
| chr8 | 13573031 | 13573286 |
| chr8 | 13606671 | 13606816 |
| chr8 | 13624671 | 13624796 |
| chr8 | 13664861 | 13664986 |
| chr8 | 13670051 | 13670296 |
| chr8 | 13670881 | 13671136 |
| chr8 | 13694221 | 13694396 |

|      |          |          |
|------|----------|----------|
| chr8 | 13701921 | 13702076 |
| chr8 | 13727391 | 13727616 |
| chr8 | 14306981 | 14307136 |
| chr8 | 14683731 | 14683896 |
| chr8 | 14892991 | 14893176 |
| chr8 | 14917131 | 14917336 |
| chr8 | 14965661 | 14965916 |
| chr8 | 14997171 | 14997356 |
| chr8 | 15032501 | 15032806 |
| chr8 | 15036531 | 15036646 |
| chr8 | 15073911 | 15074166 |
| chr8 | 18612841 | 18612956 |
| chr8 | 18676861 | 18676976 |
| chr8 | 18710601 | 18710816 |
| chr8 | 18776241 | 18776496 |
| chr8 | 19160261 | 19160406 |
| chr8 | 19707571 | 19707826 |
| chr8 | 19979911 | 19980166 |
| chr8 | 23359561 | 23359736 |
| chr8 | 23579231 | 23579446 |
| chr8 | 24301491 | 24301726 |
| chr8 | 24580781 | 24580906 |
| chr8 | 25559931 | 25560056 |
| chr8 | 26099571 | 26099796 |
| chr8 | 26114071 | 26114306 |
| chr8 | 26138351 | 26138486 |
| chr8 | 26150801 | 26151156 |
| chr8 | 26162421 | 26162566 |
| chr8 | 26254551 | 26254696 |
| chr8 | 26313191 | 26313446 |
| chr8 | 26386881 | 26387046 |
| chr8 | 26417311 | 26417436 |
| chr8 | 26468941 | 26469086 |
| chr8 | 26478361 | 26478596 |
| chr8 | 26478791 | 26479056 |
| chr8 | 26535101 | 26535336 |
| chr8 | 26550461 | 26550606 |
| chr8 | 26636341 | 26636726 |
| chr8 | 26638161 | 26638276 |
| chr8 | 26638431 | 26638546 |
| chr8 | 26639891 | 26640056 |
| chr8 | 26641131 | 26641306 |
| chr8 | 26641601 | 26642026 |
| chr8 | 26642451 | 26642746 |
| chr8 | 26645871 | 26645986 |
| chr8 | 26647941 | 26648356 |
| chr8 | 26657411 | 26657616 |
| chr8 | 26665701 | 26665956 |
| chr8 | 26670631 | 26670756 |
| chr8 | 26725631 | 26725746 |
| chr8 | 26773191 | 26773446 |
| chr8 | 26832621 | 26832756 |
| chr8 | 26896891 | 26897066 |



|      |          |          |
|------|----------|----------|
| chr8 | 27090791 | 27091036 |
| chr8 | 27917991 | 27918136 |
| chr8 | 27920801 | 27921086 |
| chr8 | 27921641 | 27921866 |
| chr8 | 27983251 | 27983496 |
| chr8 | 28076881 | 28077036 |
| chr8 | 28090291 | 28090696 |
| chr8 | 28104671 | 28104976 |
| chr8 | 28116541 | 28116796 |
| chr8 | 28215361 | 28215716 |
| chr8 | 28234971 | 28235196 |
| chr8 | 28380441 | 28380656 |
| chr8 | 31874801 | 31875026 |
| chr8 | 32211681 | 32211866 |
| chr8 | 32637141 | 32637396 |
| chr8 | 33017831 | 33017996 |
| chr8 | 34763591 | 34763726 |
| chr8 | 34916541 | 34916766 |
| chr8 | 34917091 | 34917726 |
| chr8 | 34966281 | 34966576 |
| chr8 | 34996211 | 34996426 |
| chr8 | 34999711 | 34999846 |
| chr8 | 35000291 | 35000526 |
| chr8 | 35137991 | 35138386 |
| chr8 | 35877181 | 35877416 |
| chr8 | 35883931 | 35884146 |
| chr8 | 35981731 | 35981926 |
| chr8 | 36010911 | 36011096 |
| chr8 | 36026061 | 36026176 |
| chr8 | 36268141 | 36268326 |
| chr8 | 36440231 | 36440436 |
| chr8 | 36447621 | 36447866 |
| chr8 | 36448081 | 36448456 |
| chr8 | 36975261 | 36975506 |
| chr8 | 37167701 | 37167956 |
| chr8 | 37213531 | 37213776 |
| chr8 | 37214051 | 37214286 |
| chr8 | 37346291 | 37346496 |
| chr8 | 37353911 | 37354306 |
| chr8 | 37666371 | 37666486 |
| chr8 | 37667201 | 37667416 |
| chr8 | 37668341 | 37668486 |
| chr8 | 37668721 | 37668856 |
| chr8 | 37672191 | 37672436 |
| chr8 | 37672501 | 37672746 |
| chr8 | 37672931 | 37673156 |
| chr8 | 37950511 | 37950696 |
| chr8 | 41690371 | 41690506 |
| chr8 | 41943261 | 41943476 |
| chr8 | 42049701 | 42049956 |
| chr8 | 42079341 | 42079476 |
| chr8 | 42085641 | 42085836 |
| chr8 | 42101471 | 42101866 |

|      |          |          |
|------|----------|----------|
| chr8 | 42106841 | 42107096 |
| chr8 | 42112281 | 42112406 |
| chr8 | 42129651 | 42129776 |
| chr8 | 42161321 | 42161566 |
| chr8 | 42238891 | 42239086 |
| chr8 | 42261581 | 42262006 |
| chr8 | 42423481 | 42423686 |
| chr8 | 42456371 | 42456726 |
| chr8 | 46414901 | 46415106 |
| chr8 | 46756741 | 46756956 |
| chr8 | 47231761 | 47232046 |
| chr8 | 47240341 | 47240476 |
| chr8 | 47294141 | 47294316 |
| chr8 | 47531941 | 47532146 |
| chr8 | 47556181 | 47556296 |
| chr8 | 47560911 | 47561466 |
| chr8 | 47561901 | 47562266 |
| chr8 | 47562731 | 47563026 |
| chr8 | 47563231 | 47563486 |
| chr8 | 47564131 | 47564486 |
| chr8 | 47564771 | 47565026 |
| chr8 | 47573711 | 47574576 |
| chr8 | 47575681 | 47576386 |
| chr8 | 47578311 | 47578456 |
| chr8 | 47579901 | 47580076 |
| chr8 | 47583881 | 47584026 |
| chr8 | 47584791 | 47585096 |
| chr8 | 47587121 | 47587406 |
| chr8 | 47587441 | 47587566 |
| chr8 | 47588311 | 47588546 |
| chr8 | 47589021 | 47589306 |
| chr8 | 47591271 | 47591536 |
| chr8 | 47602791 | 47602936 |
| chr8 | 47610621 | 47610876 |
| chr8 | 47612391 | 47612636 |
| chr8 | 47616031 | 47616126 |
| chr8 | 47625721 | 47626026 |
| chr8 | 47627371 | 47627686 |
| chr8 | 47632021 | 47632236 |
| chr8 | 47632471 | 47632816 |
| chr8 | 47774541 | 47774696 |
| chr8 | 47817971 | 47818116 |
| chr8 | 47926291 | 47926676 |
| chr8 | 48006931 | 48007376 |
| chr8 | 48594201 | 48594356 |
| chr8 | 48776241 | 48776376 |
| chr8 | 49068711 | 49068886 |
| chr8 | 49221121 | 49221246 |
| chr8 | 49337801 | 49337936 |
| chr8 | 49628811 | 49628926 |
| chr8 | 60055251 | 60055446 |
| chr8 | 60071571 | 60071716 |
| chr8 | 60094481 | 60094776 |

|      |          |          |
|------|----------|----------|
| chr8 | 63764551 | 63764816 |
| chr8 | 63800521 | 63800666 |
| chr8 | 63834291 | 63834686 |
| chr8 | 63900661 | 63900876 |
| chr8 | 66886831 | 66887066 |
| chr8 | 67087791 | 67088096 |
| chr8 | 67191291 | 67191446 |
| chr8 | 67191571 | 67191816 |
| chr8 | 67245891 | 67246056 |
| chr8 | 67356951 | 67357186 |
| chr8 | 67554631 | 67554806 |
| chr8 | 70799501 | 70799976 |
| chr8 | 70897411 | 70897646 |
| chr8 | 71128591 | 71128846 |
| chr8 | 71402481 | 71402656 |
| chr8 | 71415131 | 71415336 |
| chr8 | 71423161 | 71423466 |
| chr8 | 71546681 | 71546916 |
| chr8 | 71618051 | 71618286 |
| chr8 | 72237581 | 72237936 |
| chr8 | 72295131 | 72295306 |
| chr8 | 72338361 | 72338476 |
| chr8 | 72391751 | 72391896 |
| chr8 | 72427431 | 72427556 |
| chr8 | 72744521 | 72744886 |
| chr8 | 72994281 | 72994426 |
| chr8 | 73029581 | 73029726 |
| chr8 | 73053241 | 73053406 |
| chr8 | 73061911 | 73062166 |
| chr8 | 73095011 | 73095156 |
| chr8 | 73132471 | 73132686 |
| chr8 | 73132901 | 73133116 |
| chr8 | 73357561 | 73357726 |
| chr8 | 73437681 | 73438046 |
| chr8 | 73907201 | 73907326 |
| chr8 | 73999101 | 73999236 |
| chr8 | 74015491 | 74015626 |
| chr8 | 74022581 | 74022836 |
| chr8 | 74087141 | 74087376 |
| chr8 | 74092261 | 74092426 |
| chr8 | 74092731 | 74092976 |
| chr8 | 74093261 | 74093596 |
| chr8 | 74103431 | 74103736 |
| chr8 | 79457031 | 79457266 |
| chr8 | 79932551 | 79932696 |
| chr8 | 79932921 | 79933246 |
| chr8 | 79962101 | 79962216 |
| chr8 | 79997681 | 79997966 |
| chr8 | 80031661 | 80031876 |
| chr8 | 80294961 | 80295216 |
| chr8 | 80356321 | 80356496 |
| chr8 | 81095521 | 81095716 |
| chr8 | 81342651 | 81342796 |

|      |          |          |
|------|----------|----------|
| chr8 | 81628361 | 81628526 |
| chr8 | 81896511 | 81896776 |
| chr8 | 84291481 | 84291596 |
| chr8 | 85394551 | 85394786 |
| chr8 | 85412541 | 85412686 |
| chr8 | 85507301 | 85507556 |
| chr8 | 85573711 | 85573866 |
| chr8 | 85585531 | 85585766 |
| chr8 | 85833861 | 85834276 |
| chr8 | 86096701 | 86096836 |
| chr8 | 86097681 | 86097856 |
| chr8 | 86098571 | 86098796 |
| chr8 | 86101341 | 86101616 |
| chr8 | 86102901 | 86103016 |
| chr8 | 86104481 | 86104856 |
| chr8 | 86106161 | 86106416 |
| chr8 | 86190221 | 86190396 |
| chr8 | 86190401 | 86190846 |
| chr8 | 86208361 | 86208756 |
| chr8 | 86217761 | 86217916 |
| chr8 | 86296841 | 86297066 |
| chr8 | 86495381 | 86495546 |
| chr8 | 86499651 | 86499866 |
| chr8 | 86561711 | 86561926 |
| chr8 | 86566651 | 86566876 |
| chr8 | 86596401 | 86596526 |
| chr8 | 86613211 | 86613626 |
| chr8 | 86613951 | 86614336 |
| chr8 | 86614431 | 86614546 |
| chr8 | 86614911 | 86614996 |
| chr8 | 86668641 | 86668766 |
| chr8 | 86975201 | 86975346 |
| chr8 | 87158821 | 87159106 |
| chr8 | 87162231 | 87162566 |
| chr8 | 87183921 | 87184376 |
| chr8 | 87200451 | 87200576 |
| chr8 | 87230251 | 87230896 |
| chr8 | 87230901 | 87231176 |
| chr8 | 87231671 | 87231946 |
| chr8 | 87247461 | 87248076 |
| chr8 | 87248591 | 87248836 |
| chr8 | 87253901 | 87254376 |
| chr8 | 87254811 | 87254896 |
| chr8 | 87255791 | 87256016 |
| chr8 | 87277491 | 87277836 |
| chr8 | 87284651 | 87284846 |
| chr8 | 87289841 | 87290156 |
| chr8 | 87292251 | 87292446 |
| chr8 | 87299081 | 87299326 |
| chr8 | 87303001 | 87303286 |
| chr8 | 87303471 | 87303646 |
| chr8 | 87303661 | 87303836 |
| chr8 | 87304491 | 87304756 |

|      |          |          |
|------|----------|----------|
| chr8 | 87312631 | 87312986 |
| chr8 | 87313421 | 87313596 |
| chr8 | 87317021 | 87317226 |
| chr8 | 87318541 | 87318696 |
| chr8 | 87324361 | 87324706 |
| chr8 | 87324771 | 87324986 |
| chr8 | 87428221 | 87428586 |
| chr8 | 87921361 | 87921546 |
| chr8 | 87943111 | 87943456 |
| chr8 | 88011901 | 88012206 |
| chr8 | 89254601 | 89254746 |
| chr8 | 89281321 | 89281536 |
| chr8 | 89290951 | 89291106 |
| chr8 | 89350141 | 89350256 |
| chr8 | 89405151 | 89405476 |
| chr8 | 89405491 | 89405616 |
| chr8 | 89405951 | 89406176 |
| chr8 | 90327431 | 90327676 |
| chr8 | 90372811 | 90372926 |
| chr8 | 91001201 | 91001376 |
| chr8 | 92278931 | 92279176 |
| chr8 | 93392371 | 93392536 |
| chr8 | 93846981 | 93847136 |
| chr8 | 93847451 | 93847716 |
| chr8 | 93900421 | 93900546 |
| chr8 | 93900631 | 93900966 |
| chr8 | 94028641 | 94028756 |
| chr8 | 94028771 | 94029096 |
| chr8 | 94086081 | 94086266 |
| chr8 | 94086881 | 94087006 |
| chr8 | 94100821 | 94101026 |
| chr8 | 94164511 | 94164666 |
| chr8 | 94178351 | 94178486 |
| chr8 | 95349851 | 95350016 |
| chr8 | 95362611 | 95362776 |
| chr8 | 95363871 | 95364016 |
| chr8 | 96411061 | 96411286 |
| chr8 | 96411341 | 96411496 |
| chr8 | 96504041 | 96504386 |
| chr8 | 96525141 | 96525296 |
| chr8 | 96694761 | 96695386 |
| chr8 | 96702001 | 96702176 |
| chr8 | 96713321 | 96713536 |
| chr8 | 96713641 | 96713806 |
| chr8 | 96715151 | 96715266 |
| chr8 | 97309211 | 97309376 |
| chr8 | 97325311 | 97325616 |
| chr8 | 97331421 | 97331606 |
| chr8 | 97428821 | 97429076 |
| chr8 | 97653221 | 97653356 |
| chr8 | 97667351 | 97667476 |
| chr8 | 97679681 | 97679776 |
| chr8 | 97726621 | 97726876 |

|      |           |           |
|------|-----------|-----------|
| chr8 | 97872911  | 97873126  |
| chr8 | 105927641 | 105927856 |
| chr8 | 106883921 | 106884296 |
| chr8 | 106897901 | 106898156 |
| chr8 | 106900531 | 106900746 |
| chr8 | 107115561 | 107115706 |
| chr8 | 107753711 | 107753876 |
| chr8 | 107827711 | 107828096 |
| chr8 | 107868541 | 107868806 |
| chr8 | 107915681 | 107916006 |
| chr8 | 107917371 | 107917736 |
| chr8 | 107917901 | 107918166 |
| chr8 | 107930231 | 107930676 |
| chr8 | 107930681 | 107930836 |
| chr8 | 107966481 | 107966646 |
| chr8 | 107987811 | 107987936 |
| chr8 | 107988271 | 107988426 |
| chr8 | 108037691 | 108037866 |
| chr8 | 108068521 | 108068756 |
| chr8 | 108071101 | 108071246 |
| chr8 | 108135741 | 108135886 |
| chr8 | 108293021 | 108293386 |
| chr8 | 108322591 | 108322846 |
| chr8 | 108342551 | 108342776 |
| chr8 | 108599611 | 108599746 |
| chr8 | 108770201 | 108770446 |
| chr8 | 109245011 | 109245186 |
| chr8 | 109246741 | 109246996 |
| chr8 | 109293261 | 109293416 |
| chr8 | 109438701 | 109438856 |
| chr8 | 109541151 | 109541276 |
| chr8 | 109729071 | 109729616 |
| chr8 | 109920521 | 109920626 |
| chr8 | 110110011 | 110110166 |
| chr8 | 111109281 | 111109536 |
| chr8 | 111314741 | 111314936 |
| chr8 | 111436731 | 111436876 |
| chr8 | 112108511 | 112108716 |
| chr8 | 113095431 | 113095586 |
| chr8 | 113223751 | 113223886 |
| chr8 | 113341621 | 113341736 |
| chr8 | 113460211 | 113460386 |
| chr8 | 113462821 | 113462946 |
| chr8 | 113463281 | 113463416 |
| chr8 | 113470471 | 113470726 |
| chr8 | 113711511 | 113711736 |
| chr8 | 113861261 | 113861516 |
| chr8 | 113915621 | 113915876 |
| chr8 | 113937311 | 113937456 |
| chr8 | 113948641 | 113948786 |
| chr8 | 114249301 | 114249436 |
| chr8 | 114447391 | 114447506 |
| chr8 | 114552461 | 114552636 |

|      |           |           |
|------|-----------|-----------|
| chr8 | 117195241 | 117195496 |
| chr8 | 117208111 | 117208306 |
| chr8 | 117208581 | 117208836 |
| chr8 | 117297731 | 117297896 |
| chr8 | 117309711 | 117309866 |
| chr8 | 117473991 | 117474136 |
| chr8 | 118242791 | 118243046 |
| chr8 | 118555061 | 118555296 |
| chr8 | 119648251 | 119648626 |
| chr8 | 119696721 | 119696936 |
| chr8 | 119784351 | 119784506 |
| chr8 | 119821971 | 119822086 |
| chr8 | 119822271 | 119822416 |
| chr8 | 119827931 | 119828356 |
| chr8 | 119849311 | 119849456 |
| chr8 | 119864561 | 119864816 |
| chr8 | 119887191 | 119887466 |
| chr8 | 119888731 | 119888986 |
| chr8 | 119892411 | 119893156 |
| chr8 | 119904841 | 119905146 |
| chr8 | 119933331 | 119933626 |
| chr8 | 119934281 | 119934506 |
| chr8 | 119939261 | 119939386 |
| chr8 | 119947321 | 119947496 |
| chr8 | 119947581 | 119947816 |
| chr8 | 120830781 | 120830906 |
| chr8 | 121080441 | 121080746 |
| chr8 | 121256641 | 121256896 |
| chr8 | 121349871 | 121350016 |
| chr8 | 121947451 | 121947786 |
| chr8 | 121952151 | 121952376 |
| chr8 | 121961331 | 121961746 |
| chr8 | 122069271 | 122069406 |
| chr8 | 122096161 | 122096396 |
| chr8 | 122351431 | 122351686 |
| chr8 | 122439171 | 122439306 |
| chr8 | 122504621 | 122504836 |
| chr8 | 122563491 | 122563636 |
| chr8 | 122570191 | 122570616 |
| chr8 | 122709311 | 122709626 |
| chr8 | 122710041 | 122710296 |
| chr8 | 122710441 | 122710586 |
| chr8 | 122713821 | 122714076 |
| chr8 | 122728771 | 122728896 |
| chr8 | 122734331 | 122734626 |
| chr8 | 122754771 | 122755036 |
| chr8 | 122756691 | 122756816 |
| chr8 | 122756941 | 122757076 |
| chr8 | 122758351 | 122758706 |
| chr8 | 122772271 | 122772416 |
| chr8 | 122781041 | 122781416 |
| chr8 | 122807981 | 122808106 |
| chr8 | 122808891 | 122809066 |

|      |           |           |
|------|-----------|-----------|
| chr8 | 122812991 | 122813646 |
| chr8 | 122822371 | 122822506 |
| chr8 | 122824571 | 122824866 |
| chr8 | 122828661 | 122828826 |
| chr8 | 122833571 | 122833706 |
| chr8 | 122846971 | 122847406 |
| chr8 | 122872171 | 122872466 |
| chr8 | 122887721 | 122888026 |
| chr8 | 122889761 | 122889976 |
| chr8 | 122905311 | 122905546 |
| chr8 | 122937911 | 122938426 |
| chr8 | 122938501 | 122938656 |
| chr8 | 122940661 | 122940936 |
| chr8 | 122941001 | 122941126 |
| chr8 | 122941301 | 122941486 |
| chr8 | 122961631 | 122961976 |
| chr8 | 122973531 | 122973716 |
| chr8 | 122983881 | 122984096 |
| chr8 | 123005931 | 123006366 |
| chr8 | 123013961 | 123014066 |
| chr8 | 123017881 | 123018026 |
| chr8 | 123063911 | 123064206 |
| chr8 | 123072491 | 123072636 |
| chr8 | 123103531 | 123103716 |
| chr8 | 123139481 | 123139806 |
| chr8 | 123144241 | 123144456 |
| chr8 | 123146041 | 123146276 |
| chr8 | 123148341 | 123148606 |
| chr8 | 123157211 | 123157416 |
| chr8 | 123157771 | 123157886 |
| chr8 | 123167271 | 123167466 |
| chr8 | 123167641 | 123167956 |
| chr8 | 123181461 | 123181696 |
| chr8 | 123193241 | 123193486 |
| chr8 | 123265161 | 123265386 |
| chr8 | 123694591 | 123694796 |
| chr8 | 123724451 | 123724606 |
| chr8 | 123782091 | 123782406 |
| chr8 | 123782761 | 123783216 |
| chr8 | 123858521 | 123858786 |
| chr8 | 123964391 | 123964576 |
| chr8 | 124167301 | 124167476 |
| chr8 | 124167561 | 124167866 |
| chr8 | 124168621 | 124168746 |
| chr8 | 124174881 | 124175136 |
| chr8 | 124320571 | 124320816 |
| chr8 | 124329861 | 124330056 |
| chr8 | 124456411 | 124456566 |
| chr8 | 124490851 | 124491046 |
| chr8 | 124542441 | 124542696 |
| chr8 | 124634311 | 124634686 |
| chr8 | 124634711 | 124634826 |
| chr8 | 124634831 | 124634946 |



|      |           |           |
|------|-----------|-----------|
| chr8 | 125047971 | 125048316 |
| chr8 | 125048481 | 125048596 |
| chr8 | 125070651 | 125070786 |
| chr8 | 125070831 | 125071236 |
| chr8 | 125117281 | 125117486 |
| chr8 | 125179071 | 125179216 |
| chr8 | 125422541 | 125422796 |
| chr8 | 125426201 | 125426456 |
| chr8 | 125504011 | 125504346 |
| chr8 | 125511331 | 125511506 |
| chr8 | 125712921 | 125713046 |
| chr8 | 125795821 | 125795956 |
| chr8 | 125921491 | 125921626 |
| chr8 | 126185611 | 126185706 |
| chr8 | 126226071 | 126226266 |
| chr8 | 126242231 | 126242496 |
| chr8 | 126271711 | 126271876 |
| chr8 | 126337691 | 126337866 |
| chr8 | 126764761 | 126764946 |
| chr8 | 126780851 | 126781076 |
| chr8 | 126787871 | 126788016 |
| chr8 | 126788611 | 126788746 |
| chr8 | 126789791 | 126790056 |
| chr8 | 126870451 | 126870846 |
| chr8 | 127157391 | 127157536 |
| chr8 | 127242431 | 127242766 |
| chr8 | 127257041 | 127257336 |
| chr8 | 127357901 | 127358306 |
| chr8 | 127364911 | 127365166 |
| chr8 | 127382131 | 127382556 |
| chr8 | 127412831 | 127412956 |
| chr8 | 127416961 | 127417216 |
| chr8 | 127420241 | 127420466 |
| chr8 | 127420591 | 127420736 |
| chr8 | 127460591 | 127460796 |
| chr8 | 127492571 | 127492876 |
| chr8 | 127493301 | 127493406 |
| chr8 | 127816181 | 127816406 |
| chr8 | 127841811 | 127841936 |
| chr8 | 127851921 | 127852046 |
| chr8 | 127892351 | 127892596 |
| chr8 | 127969961 | 127970206 |
| chr8 | 128077751 | 128077966 |
| chr8 | 128094801 | 128095236 |
| chr8 | 128259361 | 128259566 |
| chr8 | 128301401 | 128301656 |
| chr8 | 128301831 | 128301986 |
| chr8 | 128331731 | 128332036 |
| chr8 | 128683661 | 128683816 |
| chr8 | 129015301 | 129015406 |
| chr8 | 129021751 | 129021896 |
| chr8 | 129075431 | 129075646 |
| chr8 | 129090621 | 129090866 |

|       |           |           |
|-------|-----------|-----------|
| chr8  | 129107251 | 129107866 |
| chr8  | 129108471 | 129108736 |
| chr8  | 129109451 | 129109686 |
| chr8  | 129192191 | 129192396 |
| chr8  | 129202581 | 129202766 |
| chr8  | 129206891 | 129207016 |
| chr8  | 129236821 | 129237026 |
| chr8  | 129329481 | 129329606 |
| chr8  | 129353981 | 129354186 |
| chr8  | 129636761 | 129636906 |
| chr8  | 129840281 | 129840406 |
| chr8  | 129992581 | 129992746 |
| chr8  | 130126941 | 130127246 |
| chr8  | 130334251 | 130334436 |
| chr8  | 130725711 | 130725826 |
| chr13 | 3636251   | 3636396   |
| chr13 | 3680201   | 3680316   |
| chr13 | 3769421   | 3769646   |
| chr13 | 3865461   | 3865636   |
| chr13 | 6181161   | 6181276   |
| chr13 | 6635581   | 6635836   |
| chr13 | 6636201   | 6636326   |
| chr13 | 8826261   | 8826406   |
| chr13 | 9106401   | 9106636   |
| chr13 | 9115801   | 9116086   |
| chr13 | 9120051   | 9120216   |
| chr13 | 13597331  | 13597676  |
| chr13 | 13598601  | 13598816  |
| chr13 | 16022221  | 16022356  |
| chr13 | 21540961  | 21541086  |
| chr13 | 24269391  | 24269536  |
| chr13 | 24371461  | 24371716  |
| chr13 | 24771361  | 24771476  |
| chr13 | 24901721  | 24901896  |
| chr13 | 25069401  | 25069646  |
| chr13 | 25112851  | 25113046  |
| chr13 | 29812131  | 29812366  |
| chr13 | 29883291  | 29883466  |
| chr13 | 30007031  | 30007146  |
| chr13 | 30035731  | 30035856  |
| chr13 | 30758361  | 30758906  |
| chr13 | 30836911  | 30837126  |
| chr13 | 30901181  | 30901286  |
| chr13 | 31404651  | 31404866  |
| chr13 | 31405031  | 31405206  |
| chr13 | 31451531  | 31451736  |
| chr13 | 31672881  | 31673066  |
| chr13 | 31673081  | 31673346  |
| chr13 | 31871231  | 31871406  |
| chr13 | 32585701  | 32585886  |
| chr13 | 32586281  | 32586636  |
| chr13 | 32772221  | 32772406  |
| chr13 | 32772461  | 32772636  |

|       |          |          |
|-------|----------|----------|
| chr13 | 32918041 | 32918276 |
| chr13 | 34364221 | 34364386 |
| chr13 | 34437231 | 34437526 |
| chr13 | 36248331 | 36248586 |
| chr13 | 36403691 | 36403866 |
| chr13 | 37237661 | 37237816 |
| chr13 | 37480921 | 37481146 |
| chr13 | 37516411 | 37516546 |
| chr13 | 37523031 | 37523166 |
| chr13 | 37549291 | 37549486 |
| chr13 | 37552391 | 37552506 |
| chr13 | 37560091 | 37560396 |
| chr13 | 37560791 | 37560996 |
| chr13 | 37570531 | 37570796 |
| chr13 | 37575061 | 37575416 |
| chr13 | 37587441 | 37587696 |
| chr13 | 37595381 | 37595636 |
| chr13 | 37600231 | 37600806 |
| chr13 | 37600921 | 37601126 |
| chr13 | 37606471 | 37606686 |
| chr13 | 37617391 | 37617526 |
| chr13 | 37634861 | 37635116 |
| chr13 | 37652231 | 37652636 |
| chr13 | 37749071 | 37749236 |
| chr13 | 37768781 | 37769006 |
| chr13 | 37808341 | 37808466 |
| chr13 | 37853611 | 37853786 |
| chr13 | 37895071 | 37895206 |
| chr13 | 37925601 | 37925736 |
| chr13 | 37936101 | 37936316 |
| chr13 | 37937761 | 37937906 |
| chr13 | 37938631 | 37938926 |
| chr13 | 37950191 | 37950326 |
| chr13 | 37950581 | 37950746 |
| chr13 | 37965541 | 37965686 |
| chr13 | 37968451 | 37968666 |
| chr13 | 38010671 | 38010826 |
| chr13 | 38023371 | 38023676 |
| chr13 | 38025991 | 38026116 |
| chr13 | 38553081 | 38553216 |
| chr13 | 38744511 | 38744626 |
| chr13 | 40814721 | 40815066 |
| chr13 | 41002011 | 41002186 |
| chr13 | 41002951 | 41003226 |
| chr13 | 41016921 | 41017136 |
| chr13 | 41114031 | 41114156 |
| chr13 | 41175391 | 41175566 |
| chr13 | 41429071 | 41429286 |
| chr13 | 41436901 | 41437036 |
| chr13 | 41517701 | 41517956 |
| chr13 | 41528691 | 41528946 |
| chr13 | 41545591 | 41545796 |
| chr13 | 41562311 | 41562436 |

|       |          |          |
|-------|----------|----------|
| chr13 | 41702981 | 41703136 |
| chr13 | 41923561 | 41923906 |
| chr13 | 42248511 | 42248666 |
| chr13 | 43391061 | 43391196 |
| chr13 | 43491561 | 43491756 |
| chr13 | 44126051 | 44126236 |
| chr13 | 44515231 | 44515456 |
| chr13 | 44564581 | 44564776 |
| chr13 | 44565091 | 44565266 |
| chr13 | 44802291 | 44802416 |
| chr13 | 44824691 | 44824946 |
| chr13 | 44869661 | 44869786 |
| chr13 | 44895131 | 44895286 |
| chr13 | 44939111 | 44939236 |
| chr13 | 44969651 | 44969776 |
| chr13 | 45056611 | 45056746 |
| chr13 | 45492441 | 45492556 |
| chr13 | 45565001 | 45565116 |
| chr13 | 45565541 | 45565666 |
| chr13 | 45610551 | 45610676 |
| chr13 | 45768371 | 45768626 |
| chr13 | 45817201 | 45817316 |
| chr13 | 45842981 | 45843236 |
| chr13 | 46012561 | 46012966 |
| chr13 | 46035651 | 46035836 |
| chr13 | 46055941 | 46056206 |
| chr13 | 46057681 | 46057876 |
| chr13 | 46260821 | 46261236 |
| chr13 | 46853521 | 46853646 |
| chr13 | 46974721 | 46974916 |
| chr13 | 47006721 | 47006926 |
| chr13 | 47017451 | 47017626 |
| chr13 | 47021861 | 47022106 |
| chr13 | 47022411 | 47022586 |
| chr13 | 47289341 | 47289506 |
| chr13 | 47311241 | 47311576 |
| chr13 | 47313181 | 47313346 |
| chr13 | 47319561 | 47319766 |
| chr13 | 47531471 | 47531696 |
| chr13 | 48202181 | 48202386 |
| chr13 | 48562541 | 48562676 |
| chr13 | 48669541 | 48669686 |
| chr13 | 48949871 | 48950126 |
| chr13 | 49550251 | 49550506 |
| chr13 | 49555791 | 49555916 |
| chr13 | 49556791 | 49557046 |
| chr13 | 51111771 | 51111886 |
| chr13 | 51396931 | 51397066 |
| chr13 | 51945231 | 51945486 |
| chr13 | 51964111 | 51964326 |
| chr13 | 51968311 | 51968566 |
| chr13 | 52041361 | 52041546 |
| chr13 | 52057561 | 52057726 |

|       |          |          |
|-------|----------|----------|
| chr13 | 52115191 | 52115306 |
| chr13 | 52156361 | 52156466 |
| chr13 | 52208891 | 52209106 |
| chr13 | 52212161 | 52212476 |
| chr13 | 52248151 | 52248326 |
| chr13 | 52248751 | 52249256 |
| chr13 | 52251421 | 52251556 |
| chr13 | 52318041 | 52318206 |
| chr13 | 52797721 | 52797976 |
| chr13 | 52831261 | 52831866 |
| chr13 | 52903211 | 52903386 |
| chr13 | 52946991 | 52947216 |
| chr13 | 53009871 | 53010206 |
| chr13 | 53163521 | 53163636 |
| chr13 | 54172621 | 54172776 |
| chr13 | 54175331 | 54175496 |
| chr13 | 54175561 | 54175756 |
| chr13 | 54445731 | 54445856 |
| chr13 | 54580821 | 54581046 |
| chr13 | 54663981 | 54664106 |
| chr13 | 54735021 | 54735156 |
| chr13 | 55550961 | 55551076 |
| chr13 | 55659051 | 55659206 |
| chr13 | 55824891 | 55825216 |
| chr13 | 55850291 | 55850526 |
| chr13 | 56092751 | 56092956 |
| chr13 | 56105451 | 56105646 |
| chr13 | 56214671 | 56215356 |
| chr13 | 56662091 | 56662206 |
| chr13 | 56779711 | 56779896 |
| chr13 | 56783751 | 56783986 |
| chr13 | 56855891 | 56855996 |
| chr13 | 58315331 | 58315506 |
| chr13 | 58327241 | 58327596 |
| chr13 | 58460301 | 58460556 |
| chr13 | 58505201 | 58505426 |
| chr13 | 58592241 | 58592616 |
| chr13 | 58599231 | 58599486 |
| chr13 | 59552241 | 59552376 |
| chr13 | 59648411 | 59648526 |
| chr13 | 59656671 | 59656836 |
| chr13 | 59765701 | 59765936 |
| chr13 | 59826001 | 59826146 |
| chr13 | 59859341 | 59859496 |
| chr13 | 59958261 | 59958406 |
| chr13 | 59988591 | 59988796 |
| chr13 | 60225921 | 60226106 |
| chr13 | 60226971 | 60227086 |
| chr13 | 60368881 | 60368996 |
| chr13 | 60396541 | 60396796 |
| chr13 | 60439471 | 60439596 |
| chr13 | 60507741 | 60507926 |
| chr13 | 60518721 | 60519016 |

|       |           |           |
|-------|-----------|-----------|
| chr13 | 60535671  | 60535916  |
| chr13 | 60704531  | 60704716  |
| chr13 | 60786351  | 60786686  |
| chr13 | 63057221  | 63057366  |
| chr13 | 63362111  | 63362376  |
| chr13 | 64020491  | 64020626  |
| chr13 | 64100321  | 64100476  |
| chr13 | 65202611  | 65202756  |
| chr13 | 69665081  | 69665216  |
| chr13 | 69680591  | 69680776  |
| chr13 | 70728821  | 70728996  |
| chr13 | 71341021  | 71341176  |
| chr13 | 73900781  | 73900906  |
| chr13 | 73905411  | 73905566  |
| chr13 | 73907201  | 73907326  |
| chr13 | 73953301  | 73953436  |
| chr13 | 73964991  | 73965166  |
| chr13 | 74075841  | 74075996  |
| chr13 | 75968711  | 75968936  |
| chr13 | 78331971  | 78332166  |
| chr13 | 90069291  | 90069536  |
| chr13 | 90170441  | 90170606  |
| chr13 | 91617891  | 91618116  |
| chr13 | 91704491  | 91704606  |
| chr13 | 91770891  | 91771316  |
| chr13 | 91881361  | 91881586  |
| chr13 | 93914261  | 93914436  |
| chr13 | 93914471  | 93914836  |
| chr13 | 94576231  | 94576436  |
| chr13 | 94755761  | 94755996  |
| chr13 | 94827051  | 94827206  |
| chr13 | 94868781  | 94869166  |
| chr13 | 94870671  | 94870996  |
| chr13 | 95131861  | 95132176  |
| chr13 | 95208721  | 95209016  |
| chr13 | 95213881  | 95214146  |
| chr13 | 95289001  | 95289136  |
| chr13 | 96490121  | 96490236  |
| chr13 | 97220821  | 97221016  |
| chr13 | 98014971  | 98015246  |
| chr13 | 98261371  | 98261536  |
| chr13 | 98270231  | 98270456  |
| chr13 | 98369451  | 98369626  |
| chr13 | 98387391  | 98387506  |
| chr13 | 98453841  | 98454096  |
| chr13 | 98521201  | 98521316  |
| chr13 | 98544851  | 98545066  |
| chr13 | 98546961  | 98547116  |
| chr13 | 99163341  | 99163536  |
| chr13 | 99246321  | 99246476  |
| chr13 | 99682251  | 99682496  |
| chr13 | 99895061  | 99895176  |
| chr13 | 100212721 | 100212936 |

|       |           |           |
|-------|-----------|-----------|
| chr13 | 100247111 | 100247196 |
| chr13 | 101114181 | 101114346 |
| chr13 | 101862801 | 101863096 |
| chr13 | 102482101 | 102482326 |
| chr13 | 102489831 | 102489996 |
| chr13 | 102502671 | 102502836 |
| chr13 | 102522831 | 102523106 |
| chr13 | 102523731 | 102523996 |
| chr13 | 102524191 | 102524366 |
| chr13 | 102526651 | 102526776 |
| chr13 | 102527641 | 102528136 |
| chr13 | 102528311 | 102528646 |
| chr13 | 102531491 | 102531656 |
| chr13 | 102531911 | 102532106 |
| chr13 | 102533371 | 102533526 |
| chr13 | 102533691 | 102533836 |
| chr13 | 102534111 | 102534256 |
| chr13 | 102534831 | 102535186 |
| chr13 | 102581531 | 102581806 |
| chr13 | 102581961 | 102582136 |
| chr13 | 102582241 | 102582496 |
| chr13 | 102618241 | 102618356 |
| chr13 | 102737691 | 102737846 |
| chr13 | 102884271 | 102884426 |
| chr13 | 103217781 | 103217946 |
| chr13 | 103347271 | 103347526 |
| chr13 | 103363851 | 103363966 |
| chr13 | 103367461 | 103367586 |
| chr13 | 103488971 | 103489186 |
| chr13 | 103491691 | 103491806 |
| chr13 | 103565701 | 103565956 |
| chr13 | 103777711 | 103778076 |
| chr13 | 103973901 | 103974026 |
| chr13 | 103996931 | 103997236 |
| chr13 | 104010721 | 104010886 |
| chr13 | 104075111 | 104075376 |
| chr13 | 104076291 | 104076486 |
| chr13 | 104783251 | 104783426 |
| chr13 | 104827061 | 104827326 |
| chr13 | 105419821 | 105420126 |
| chr13 | 105440341 | 105440526 |
| chr13 | 108161451 | 108161636 |
| chr13 | 108161861 | 108162506 |
| chr13 | 108647231 | 108647526 |
| chr13 | 108713461 | 108713556 |
| chr13 | 108713581 | 108713726 |
| chr13 | 109109911 | 109110076 |
| chr13 | 110020841 | 110021006 |
| chr13 | 110077841 | 110077986 |
| chr13 | 110114141 | 110114316 |
| chr13 | 110433531 | 110433746 |
| chr13 | 110627761 | 110627876 |
| chr13 | 110690431 | 110690666 |

|       |           |           |
|-------|-----------|-----------|
| chr13 | 110704441 | 110704686 |
| chr13 | 111390661 | 111390786 |
| chr13 | 112578871 | 112578986 |
| chr13 | 112591971 | 112592216 |
| chr13 | 112599871 | 112600046 |
| chr13 | 112695661 | 112695926 |
| chr13 | 112787031 | 112787286 |
| chr13 | 112848241 | 112848376 |
| chr13 | 112850021 | 112850216 |
| chr13 | 112857251 | 112857506 |
| chr13 | 112910051 | 112910276 |
| chr13 | 113044421 | 113044846 |
| chr13 | 113262651 | 113262786 |
| chr13 | 113303251 | 113303366 |
| chr13 | 113323771 | 113323916 |
| chr13 | 113327821 | 113327976 |
| chr13 | 113474271 | 113474496 |
| chr13 | 113545721 | 113545876 |
| chr13 | 114142811 | 114143066 |
| chr13 | 114275781 | 114276006 |
| chr13 | 114601931 | 114602056 |
| chr13 | 114607161 | 114607446 |
| chr13 | 114654701 | 114654906 |
| chr13 | 114662161 | 114662386 |
| chr13 | 114730251 | 114730486 |
| chr13 | 114740001 | 114740166 |
| chr13 | 114978401 | 114978546 |
| chr13 | 115432321 | 115432446 |
| chr13 | 115891581 | 115891776 |
| chr13 | 115896431 | 115896546 |
| chr13 | 117798951 | 117799186 |
| chr13 | 118023411 | 118023646 |
| chr13 | 119417541 | 119417776 |
| chr13 | 120057341 | 120057546 |
| chr12 | 3732781   | 3732926   |
| chr12 | 3850201   | 3850456   |
| chr12 | 3858151   | 3858646   |
| chr12 | 3866911   | 3867046   |
| chr12 | 3868641   | 3868866   |
| chr12 | 4480801   | 4481156   |
| chr12 | 4482331   | 4482516   |
| chr12 | 8396331   | 8396526   |
| chr12 | 8425691   | 8425936   |
| chr12 | 8439201   | 8439476   |
| chr12 | 8443461   | 8443686   |
| chr12 | 8663971   | 8664106   |
| chr12 | 8790891   | 8791276   |
| chr12 | 8808631   | 8808786   |
| chr12 | 8818111   | 8818416   |
| chr12 | 8853601   | 8853796   |
| chr12 | 8919861   | 8919996   |
| chr12 | 9378881   | 9379026   |
| chr12 | 10102751  | 10102996  |



|       |          |          |
|-------|----------|----------|
| chr12 | 15772961 | 15773216 |
| chr12 | 16543381 | 16543666 |
| chr12 | 16555581 | 16555836 |
| chr12 | 16569091 | 16569256 |
| chr12 | 16578131 | 16578446 |
| chr12 | 16587541 | 16587656 |
| chr12 | 16588961 | 16589116 |
| chr12 | 16589201 | 16589396 |
| chr12 | 16591221 | 16591426 |
| chr12 | 16591921 | 16592176 |
| chr12 | 16592371 | 16592596 |
| chr12 | 16594711 | 16594866 |
| chr12 | 16595041 | 16595276 |
| chr12 | 16595521 | 16595736 |
| chr12 | 16596211 | 16596326 |
| chr12 | 16599991 | 16600206 |
| chr12 | 17008451 | 17008626 |
| chr12 | 17730841 | 17731006 |
| chr12 | 21166101 | 21166236 |
| chr12 | 21171761 | 21171946 |
| chr12 | 25258361 | 25258556 |
| chr12 | 25753171 | 25753326 |
| chr12 | 27058691 | 27058966 |
| chr12 | 27072381 | 27072616 |
| chr12 | 27088011 | 27088206 |
| chr12 | 27089731 | 27089966 |
| chr12 | 29389451 | 29389756 |
| chr12 | 29403021 | 29403246 |
| chr12 | 29489051 | 29489226 |
| chr12 | 30670291 | 30670436 |
| chr12 | 31621181 | 31621316 |
| chr12 | 31697161 | 31697406 |
| chr12 | 31756121 | 31756486 |
| chr12 | 31763691 | 31763856 |
| chr12 | 31766961 | 31767076 |
| chr12 | 31767211 | 31767466 |
| chr12 | 31767861 | 31768046 |
| chr12 | 31854971 | 31855316 |
| chr12 | 31967241 | 31967496 |
| chr12 | 31977921 | 31978176 |
| chr12 | 31978391 | 31978796 |
| chr12 | 31979791 | 31980266 |
| chr12 | 31980441 | 31980766 |
| chr12 | 31987591 | 31988256 |
| chr12 | 31991891 | 31992196 |
| chr12 | 31995531 | 31995826 |
| chr12 | 32397231 | 32397386 |
| chr12 | 32739261 | 32739456 |
| chr12 | 32760261 | 32760516 |
| chr12 | 33317591 | 33317726 |
| chr12 | 33715031 | 33715306 |
| chr12 | 33742321 | 33742566 |
| chr12 | 33855661 | 33856156 |

|       |          |          |
|-------|----------|----------|
| chr12 | 34640631 | 34641056 |
| chr12 | 35703471 | 35703736 |
| chr12 | 40218601 | 40218736 |
| chr12 | 40683221 | 40683386 |
| chr12 | 41225851 | 41225966 |
| chr12 | 41265481 | 41265686 |
| chr12 | 45376811 | 45376936 |
| chr12 | 45429401 | 45429606 |
| chr12 | 52863361 | 52863536 |
| chr12 | 53324121 | 53324316 |
| chr12 | 53891341 | 53891496 |
| chr12 | 53936591 | 53936766 |
| chr12 | 55288351 | 55288466 |
| chr12 | 55292031 | 55292256 |
| chr12 | 55292331 | 55292756 |
| chr12 | 55295491 | 55295736 |
| chr12 | 55298781 | 55299036 |
| chr12 | 55353431 | 55353646 |
| chr12 | 56408671 | 56408836 |
| chr12 | 56445691 | 56445936 |
| chr12 | 56489231 | 56489366 |
| chr12 | 56547981 | 56548486 |
| chr12 | 56575701 | 56575956 |
| chr12 | 56588531 | 56588656 |
| chr12 | 57636551 | 57636786 |
| chr12 | 59369691 | 59370046 |
| chr12 | 60157381 | 60157596 |
| chr12 | 70400311 | 70400566 |
| chr12 | 70442171 | 70442386 |
| chr12 | 70518631 | 70518886 |
| chr12 | 70563501 | 70563676 |
| chr12 | 70577461 | 70577736 |
| chr12 | 70595741 | 70595906 |
| chr12 | 70826871 | 70827116 |
| chr12 | 70988841 | 70989096 |
| chr12 | 71098111 | 71098356 |
| chr12 | 71149871 | 71150096 |
| chr12 | 71203461 | 71203656 |
| chr12 | 71634451 | 71634946 |
| chr12 | 71776961 | 71777086 |
| chr12 | 71787851 | 71788326 |
| chr12 | 71938561 | 71938806 |
| chr12 | 71939101 | 71939496 |
| chr12 | 71970051 | 71970296 |
| chr12 | 72958001 | 72958216 |
| chr12 | 73868991 | 73869186 |
| chr12 | 74154101 | 74154236 |
| chr12 | 74300721 | 74300816 |
| chr12 | 74509321 | 74509566 |
| chr12 | 74546571 | 74546836 |
| chr12 | 74580541 | 74580836 |
| chr12 | 74581101 | 74581406 |
| chr12 | 74582651 | 74582906 |

|       |          |          |
|-------|----------|----------|
| chr12 | 74597691 | 74597826 |
| chr12 | 74599391 | 74599506 |
| chr12 | 74841971 | 74842146 |
| chr12 | 74948521 | 74948636 |
| chr12 | 76758991 | 76759246 |
| chr12 | 76928681 | 76929196 |
| chr12 | 76947711 | 76947906 |
| chr12 | 76954281 | 76954756 |
| chr12 | 77296971 | 77297106 |
| chr12 | 77412351 | 77412586 |
| chr12 | 77493741 | 77493996 |
| chr12 | 77647931 | 77648266 |
| chr12 | 77648341 | 77648706 |
| chr12 | 77648851 | 77649106 |
| chr12 | 77679231 | 77679456 |
| chr12 | 77921331 | 77921456 |
| chr12 | 77967261 | 77967656 |
| chr12 | 78035801 | 78035916 |
| chr12 | 78140671 | 78140846 |
| chr12 | 78942951 | 78943086 |
| chr12 | 80336761 | 80337096 |
| chr12 | 80446371 | 80446506 |
| chr12 | 80485991 | 80486116 |
| chr12 | 80542241 | 80542496 |
| chr12 | 80543901 | 80544096 |
| chr12 | 80661441 | 80661656 |
| chr12 | 80714541 | 80714656 |
| chr12 | 80776291 | 80776786 |
| chr12 | 80776941 | 80777276 |
| chr12 | 80808141 | 80808346 |
| chr12 | 80836381 | 80836616 |
| chr12 | 80852791 | 80853196 |
| chr12 | 80867041 | 80867276 |
| chr12 | 81024701 | 81024976 |
| chr12 | 81067841 | 81068086 |
| chr12 | 81071291 | 81071536 |
| chr12 | 81087541 | 81087746 |
| chr12 | 81099981 | 81100156 |
| chr12 | 81211241 | 81211356 |
| chr12 | 81224651 | 81224906 |
| chr12 | 81236251 | 81236456 |
| chr12 | 81628751 | 81628906 |
| chr12 | 81788841 | 81789096 |
| chr12 | 82127951 | 82128196 |
| chr12 | 82256621 | 82256786 |
| chr12 | 82953881 | 82954096 |
| chr12 | 83026281 | 83026466 |
| chr12 | 83044361 | 83044606 |
| chr12 | 83293461 | 83293646 |
| chr12 | 83327021 | 83327156 |
| chr12 | 83428081 | 83428326 |
| chr12 | 83434541 | 83434656 |
| chr12 | 84923021 | 84923156 |

|       |          |          |
|-------|----------|----------|
| chr12 | 85103501 | 85103686 |
| chr12 | 85104501 | 85104926 |
| chr12 | 85105011 | 85105336 |
| chr12 | 85135841 | 85136016 |
| chr12 | 85330061 | 85330266 |
| chr12 | 85502041 | 85502206 |
| chr12 | 85514151 | 85514466 |
| chr12 | 85514881 | 85515026 |
| chr12 | 85515031 | 85515286 |
| chr12 | 85522771 | 85522906 |
| chr12 | 85523571 | 85523706 |
| chr12 | 85542321 | 85542456 |
| chr12 | 85543811 | 85544016 |
| chr12 | 85548451 | 85548676 |
| chr12 | 85555661 | 85555916 |
| chr12 | 85616191 | 85616376 |
| chr12 | 85706021 | 85706196 |
| chr12 | 85740381 | 85740566 |
| chr12 | 85750491 | 85750746 |
| chr12 | 85955321 | 85955446 |
| chr12 | 86104291 | 86104486 |
| chr12 | 86148371 | 86148756 |
| chr12 | 86148911 | 86149216 |
| chr12 | 86149521 | 86149646 |
| chr12 | 86150721 | 86150976 |
| chr12 | 86164631 | 86164736 |
| chr12 | 86164751 | 86164876 |
| chr12 | 86165451 | 86165636 |
| chr12 | 86189181 | 86189416 |
| chr12 | 86192461 | 86192576 |
| chr12 | 86228171 | 86228346 |
| chr12 | 86284091 | 86284356 |
| chr12 | 86286031 | 86286446 |
| chr12 | 86292181 | 86292426 |
| chr12 | 86310241 | 86310616 |
| chr12 | 86535941 | 86536346 |
| chr12 | 86539151 | 86539276 |
| chr12 | 86738191 | 86738446 |
| chr12 | 86778251 | 86778446 |
| chr12 | 86942781 | 86942906 |
| chr12 | 87100071 | 87100196 |
| chr12 | 87315251 | 87315506 |
| chr12 | 87418611 | 87418776 |
| chr12 | 87444481 | 87444656 |
| chr12 | 87490621 | 87490776 |
| chr12 | 87496351 | 87496496 |
| chr12 | 87499141 | 87499256 |
| chr12 | 88147041 | 88147226 |
| chr12 | 88273471 | 88273676 |
| chr12 | 88715231 | 88715486 |
| chr12 | 88746131 | 88746386 |
| chr12 | 89658751 | 89658946 |
| chr12 | 92266341 | 92266496 |

|       |           |           |
|-------|-----------|-----------|
| chr12 | 92324561  | 92324816  |
| chr12 | 92790451  | 92790726  |
| chr12 | 93042041  | 93042196  |
| chr12 | 99990151  | 99990536  |
| chr12 | 100317241 | 100317426 |
| chr12 | 100446711 | 100446966 |
| chr12 | 100519161 | 100519276 |
| chr12 | 100524321 | 100524496 |
| chr12 | 100537261 | 100537476 |
| chr12 | 100583621 | 100583766 |
| chr12 | 100589991 | 100590166 |
| chr12 | 100601351 | 100601596 |
| chr12 | 100628761 | 100628926 |
| chr12 | 100650451 | 100650576 |
| chr12 | 100757641 | 100757806 |
| chr12 | 101096331 | 101096496 |
| chr12 | 101096951 | 101097096 |
| chr12 | 101554491 | 101554706 |
| chr12 | 101630841 | 101630956 |
| chr12 | 101715891 | 101716046 |
| chr12 | 101716331 | 101716476 |
| chr12 | 101718881 | 101719106 |
| chr12 | 101777621 | 101777886 |
| chr12 | 102057241 | 102057396 |
| chr12 | 103105431 | 103105576 |
| chr12 | 103228581 | 103228726 |
| chr12 | 103425411 | 103425576 |
| chr12 | 103522221 | 103522396 |
| chr12 | 103546731 | 103546966 |
| chr12 | 103636651 | 103636766 |
| chr12 | 103846071 | 103846396 |
| chr12 | 103865221 | 103865356 |
| chr12 | 103930041 | 103930286 |
| chr12 | 103931121 | 103931246 |
| chr12 | 103932411 | 103932556 |
| chr12 | 103942221 | 103942486 |
| chr12 | 105261521 | 105261676 |
| chr12 | 105974251 | 105974386 |
| chr12 | 106124761 | 106125016 |
| chr12 | 106217121 | 106217256 |
| chr12 | 106217361 | 106217536 |
| chr12 | 107047291 | 107047396 |
| chr12 | 107081481 | 107081686 |
| chr12 | 107096481 | 107096776 |
| chr12 | 107201891 | 107202056 |
| chr12 | 107230001 | 107230166 |
| chr12 | 107230491 | 107230606 |
| chr12 | 108958541 | 108958706 |
| chr12 | 108993481 | 108993756 |
| chr12 | 109048101 | 109048266 |
| chr12 | 109050761 | 109050966 |
| chr12 | 109128141 | 109128396 |
| chr12 | 109191441 | 109191546 |

|       |           |           |
|-------|-----------|-----------|
| chr12 | 109474901 | 109475016 |
| chr12 | 109475491 | 109475606 |
| chr12 | 109478231 | 109478386 |
| chr12 | 109483791 | 109484136 |
| chr12 | 109490391 | 109490596 |
| chr12 | 109494781 | 109494996 |
| chr12 | 109504051 | 109504206 |
| chr12 | 109507341 | 109507596 |
| chr12 | 109624881 | 109625206 |
| chr12 | 109673871 | 109674126 |
| chr12 | 109792221 | 109792506 |
| chr12 | 110145231 | 110145766 |
| chr12 | 110172291 | 110172556 |
| chr12 | 110198461 | 110198666 |
| chr12 | 110282231 | 110282486 |
| chr12 | 110711851 | 110712046 |
| chr12 | 111349661 | 111349906 |
| chr12 | 111371611 | 111371806 |
| chr12 | 111394591 | 111394936 |
| chr12 | 111458541 | 111458766 |
| chr12 | 111462631 | 111462826 |
| chr12 | 111504911 | 111505136 |
| chr12 | 111610281 | 111610576 |
| chr12 | 111610641 | 111610886 |
| chr12 | 111698711 | 111698966 |
| chr12 | 111736351 | 111736666 |
| chr12 | 111736801 | 111737396 |
| chr12 | 111742431 | 111742666 |
| chr12 | 111746131 | 111746246 |
| chr12 | 111772851 | 111773106 |
| chr12 | 111774051 | 111774276 |
| chr12 | 112019521 | 112019636 |
| chr12 | 112036261 | 112036376 |
| chr12 | 112093511 | 112093656 |
| chr12 | 112214761 | 112214976 |
| chr12 | 112222051 | 112222306 |
| chr12 | 112231011 | 112231266 |
| chr12 | 112327491 | 112327746 |
| chr12 | 112335381 | 112335566 |
| chr12 | 112552601 | 112552756 |
| chr12 | 112559001 | 112559256 |
| chr12 | 112559561 | 112559836 |
| chr12 | 112559841 | 112560466 |
| chr12 | 112561051 | 112561386 |
| chr12 | 112564121 | 112564296 |
| chr12 | 112564541 | 112564646 |
| chr12 | 112568251 | 112568436 |
| chr12 | 112598721 | 112598976 |
| chr12 | 112600401 | 112600776 |
| chr12 | 112659841 | 112660016 |
| chr12 | 112674981 | 112675106 |
| chr12 | 112686371 | 112686526 |
| chr12 | 112830721 | 112830866 |

|       |           |           |
|-------|-----------|-----------|
| chr12 | 112926301 | 112926546 |
| chr12 | 112970791 | 112970966 |
| chr12 | 112995071 | 112995246 |
| chr12 | 113006511 | 113006766 |
| chr12 | 113008531 | 113008756 |
| chr12 | 113031861 | 113032286 |
| chr12 | 113033301 | 113033686 |
| chr12 | 113035201 | 113035356 |
| chr12 | 113035501 | 113035856 |
| chr12 | 113035931 | 113036216 |
| chr12 | 113038351 | 113038756 |
| chr12 | 113046511 | 113046816 |
| chr12 | 113050001 | 113050286 |
| chr12 | 113050961 | 113051116 |
| chr12 | 113053671 | 113053946 |
| chr12 | 113056111 | 113056536 |
| chr12 | 113058341 | 113058596 |
| chr12 | 113170951 | 113171136 |
| chr12 | 113171581 | 113171886 |
| chr12 | 113726861 | 113727156 |
| chr12 | 113727191 | 113727326 |
| chr12 | 113730431 | 113730616 |
| chr12 | 113831351 | 113831526 |
| chr12 | 113835931 | 113836196 |
| chr12 | 113903811 | 113903976 |
| chr12 | 113957111 | 113957316 |
| chr12 | 114271491 | 114271616 |
| chr12 | 114339291 | 114339546 |
| chr12 | 114379381 | 114379536 |
| chr12 | 114379811 | 114380126 |
| chr12 | 114381091 | 114381256 |
| chr12 | 117287951 | 117288206 |
| chr12 | 117637081 | 117637286 |
| chr12 | 117637341 | 117637596 |
| chr12 | 119070551 | 119070666 |
| chr12 | 119575951 | 119576086 |
| chr11 | 3025821   | 3026106   |
| chr11 | 3031951   | 3032656   |
| chr11 | 3036541   | 3036866   |
| chr11 | 3042721   | 3042896   |
| chr11 | 3043281   | 3043396   |
| chr11 | 3044851   | 3045356   |
| chr11 | 3046271   | 3046476   |
| chr11 | 3047571   | 3047756   |
| chr11 | 3048631   | 3048816   |
| chr11 | 3050101   | 3050356   |
| chr11 | 3051181   | 3051436   |
| chr11 | 3054091   | 3054346   |
| chr11 | 3061261   | 3061496   |
| chr11 | 3062651   | 3062776   |
| chr11 | 3064071   | 3064196   |
| chr11 | 3065551   | 3065916   |
| chr11 | 3073271   | 3073476   |

|       |          |          |
|-------|----------|----------|
| chr11 | 3081371  | 3081626  |
| chr11 | 3089911  | 3090126  |
| chr11 | 3092221  | 3092366  |
| chr11 | 3093681  | 3093866  |
| chr11 | 3098081  | 3098466  |
| chr11 | 3234361  | 3234586  |
| chr11 | 3549951  | 3550166  |
| chr11 | 3604841  | 3604966  |
| chr11 | 3995881  | 3996126  |
| chr11 | 4128481  | 4128716  |
| chr11 | 4388681  | 4388796  |
| chr11 | 4964111  | 4964366  |
| chr11 | 5405861  | 5406116  |
| chr11 | 5415791  | 5416026  |
| chr11 | 5428631  | 5428746  |
| chr11 | 5430101  | 5430336  |
| chr11 | 5439641  | 5439856  |
| chr11 | 5600911  | 5601086  |
| chr11 | 6084071  | 6084326  |
| chr11 | 6306831  | 6307156  |
| chr11 | 8366681  | 8366936  |
| chr11 | 8414181  | 8414436  |
| chr11 | 8540431  | 8540716  |
| chr11 | 8553881  | 8554186  |
| chr11 | 8554201  | 8554426  |
| chr11 | 8556651  | 8556906  |
| chr11 | 8559521  | 8559706  |
| chr11 | 11724411 | 11724536 |
| chr11 | 11733101 | 11733256 |
| chr11 | 11744751 | 11744986 |
| chr11 | 11745331 | 11745446 |
| chr11 | 11865631 | 11866106 |
| chr11 | 16652001 | 16652246 |
| chr11 | 16666091 | 16666256 |
| chr11 | 18497141 | 18497376 |
| chr11 | 18501281 | 18501486 |
| chr11 | 18650861 | 18651126 |
| chr11 | 18856081 | 18856336 |
| chr11 | 19861281 | 19861446 |
| chr11 | 20218771 | 20219026 |
| chr11 | 20503051 | 20503246 |
| chr11 | 20545191 | 20545306 |
| chr11 | 21628361 | 21628556 |
| chr11 | 22001151 | 22001276 |
| chr11 | 22185431 | 22185586 |
| chr11 | 22484961 | 22485116 |
| chr11 | 23557861 | 23557956 |
| chr11 | 29708751 | 29709006 |
| chr11 | 31568311 | 31568446 |
| chr11 | 31708261 | 31708356 |
| chr11 | 31724371 | 31724666 |
| chr11 | 32260751 | 32260906 |
| chr11 | 32283351 | 32283506 |



|       |          |          |
|-------|----------|----------|
| chr11 | 32452791 | 32452946 |
| chr11 | 32599231 | 32599466 |
| chr11 | 34495381 | 34495606 |
| chr11 | 34647311 | 34647526 |
| chr11 | 34659621 | 34659776 |
| chr11 | 34678691 | 34679056 |
| chr11 | 35061481 | 35061606 |
| chr11 | 35061611 | 35061736 |
| chr11 | 35205141 | 35205256 |
| chr11 | 35408001 | 35408166 |
| chr11 | 35437641 | 35437816 |
| chr11 | 35519231 | 35519356 |
| chr11 | 35557051 | 35557216 |
| chr11 | 35565091 | 35565326 |
| chr11 | 35567191 | 35567406 |
| chr11 | 35589861 | 35590026 |
| chr11 | 35596691 | 35596846 |
| chr11 | 35607121 | 35607346 |
| chr11 | 35707381 | 35707536 |
| chr11 | 35746171 | 35746286 |
| chr11 | 38623751 | 38623926 |
| chr11 | 40567461 | 40567556 |
| chr11 | 43342501 | 43342616 |
| chr11 | 43362661 | 43362866 |
| chr11 | 43714411 | 43714586 |
| chr11 | 43739271 | 43739446 |
| chr11 | 43739931 | 43740146 |
| chr11 | 43942241 | 43942426 |
| chr11 | 44052131 | 44052256 |
| chr11 | 44355821 | 44356126 |
| chr11 | 44499361 | 44499646 |
| chr11 | 44608901 | 44609116 |
| chr11 | 45929831 | 45930056 |
| chr11 | 45936821 | 45937006 |
| chr11 | 45937231 | 45937456 |
| chr11 | 46834831 | 46835026 |
| chr11 | 48611511 | 48611736 |
| chr11 | 49062231 | 49062526 |
| chr11 | 49432411 | 49432586 |
| chr11 | 49968421 | 49968726 |
| chr11 | 50014121 | 50014236 |
| chr11 | 50014241 | 50014376 |
| chr11 | 50040211 | 50040516 |
| chr11 | 50051991 | 50052226 |
| chr11 | 50079451 | 50079586 |
| chr11 | 50494751 | 50495066 |
| chr11 | 51638521 | 51638866 |
| chr11 | 51664331 | 51664876 |
| chr11 | 51664951 | 51665266 |
| chr11 | 51667421 | 51667546 |
| chr11 | 51668021 | 51668216 |
| chr11 | 52086741 | 52087236 |
| chr11 | 52182761 | 52183096 |

|       |          |          |
|-------|----------|----------|
| chr11 | 53317911 | 53318056 |
| chr11 | 53382771 | 53382906 |
| chr11 | 53448631 | 53448846 |
| chr11 | 53448931 | 53449106 |
| chr11 | 53449891 | 53450036 |
| chr11 | 53471071 | 53471206 |
| chr11 | 53600071 | 53600206 |
| chr11 | 53626991 | 53627126 |
| chr11 | 53654911 | 53655236 |
| chr11 | 53706651 | 53706786 |
| chr11 | 53820561 | 53820726 |
| chr11 | 53821871 | 53822136 |
| chr11 | 53916591 | 53916796 |
| chr11 | 53953801 | 53953956 |
| chr11 | 54455421 | 54455546 |
| chr11 | 54719571 | 54719746 |
| chr11 | 54753691 | 54753876 |
| chr11 | 54756351 | 54756616 |
| chr11 | 54758391 | 54758746 |
| chr11 | 54767621 | 54767756 |
| chr11 | 54832311 | 54832496 |
| chr11 | 54889991 | 54890176 |
| chr11 | 54995531 | 54995786 |
| chr11 | 55027251 | 55027506 |
| chr11 | 55181271 | 55181386 |
| chr11 | 55295051 | 55295256 |
| chr11 | 55316101 | 55316386 |
| chr11 | 57501751 | 57501936 |
| chr11 | 57510031 | 57510186 |
| chr11 | 59449991 | 59450106 |
| chr11 | 59607821 | 59607996 |
| chr11 | 59847761 | 59848156 |
| chr11 | 59884871 | 59885046 |
| chr11 | 59887581 | 59887706 |
| chr11 | 59978111 | 59978286 |
| chr11 | 60011731 | 60012106 |
| chr11 | 60012771 | 60012886 |
| chr11 | 60014391 | 60014696 |
| chr11 | 60018501 | 60018756 |
| chr11 | 60018921 | 60019186 |
| chr11 | 60021181 | 60021316 |
| chr11 | 60021771 | 60021916 |
| chr11 | 60025351 | 60025546 |
| chr11 | 60526961 | 60527136 |
| chr11 | 60653811 | 60654096 |
| chr11 | 60658361 | 60658496 |
| chr11 | 60678551 | 60678766 |
| chr11 | 60715611 | 60715826 |
| chr11 | 60715951 | 60716096 |
| chr11 | 60717361 | 60717706 |
| chr11 | 61020451 | 61020596 |
| chr11 | 61021901 | 61022026 |
| chr11 | 61033371 | 61033526 |

|       |          |          |
|-------|----------|----------|
| chr11 | 61262651 | 61262836 |
| chr11 | 61263981 | 61264116 |
| chr11 | 61269631 | 61269746 |
| chr11 | 61300871 | 61301126 |
| chr11 | 62054211 | 62054446 |
| chr11 | 62057821 | 62058036 |
| chr11 | 62104081 | 62104246 |
| chr11 | 62292491 | 62293066 |
| chr11 | 62648641 | 62648786 |
| chr11 | 62942991 | 62943146 |
| chr11 | 62977811 | 62978066 |
| chr11 | 63813691 | 63813936 |
| chr11 | 63814101 | 63814526 |
| chr11 | 63815781 | 63816016 |
| chr11 | 63841061 | 63841206 |
| chr11 | 63913991 | 63914126 |
| chr11 | 64841321 | 64841486 |
| chr11 | 64879721 | 64880036 |
| chr11 | 65037451 | 65037636 |
| chr11 | 65240591 | 65240846 |
| chr11 | 65288811 | 65289066 |
| chr11 | 65589801 | 65589996 |
| chr11 | 65629801 | 65630066 |
| chr11 | 67295221 | 67295446 |
| chr11 | 67372811 | 67373046 |
| chr11 | 67831691 | 67831816 |
| chr11 | 67857841 | 67858156 |
| chr11 | 67863131 | 67863236 |
| chr11 | 67985961 | 67986146 |
| chr11 | 68001531 | 68001666 |
| chr11 | 68002191 | 68002476 |
| chr11 | 68016131 | 68016296 |
| chr11 | 68018501 | 68018806 |
| chr11 | 68100181 | 68100346 |
| chr11 | 68134391 | 68134526 |
| chr11 | 68154431 | 68154586 |
| chr11 | 68407721 | 68407856 |
| chr11 | 68532871 | 68533086 |
| chr11 | 68544851 | 68545106 |
| chr11 | 68545781 | 68546036 |
| chr11 | 68637591 | 68637746 |
| chr11 | 68722871 | 68723036 |
| chr11 | 68865271 | 68865536 |
| chr11 | 69153131 | 69153386 |
| chr11 | 69178961 | 69179076 |
| chr11 | 69185351 | 69185526 |
| chr11 | 69203481 | 69203676 |
| chr11 | 69227461 | 69227676 |
| chr11 | 69334031 | 69334156 |
| chr11 | 69334431 | 69334636 |
| chr11 | 69405921 | 69406166 |
| chr11 | 69477111 | 69477396 |
| chr11 | 69499351 | 69499486 |

|       |          |          |
|-------|----------|----------|
| chr11 | 69617821 | 69617966 |
| chr11 | 69642881 | 69643156 |
| chr11 | 69750301 | 69750466 |
| chr11 | 69757501 | 69757816 |
| chr11 | 69758021 | 69758386 |
| chr11 | 69758681 | 69758926 |
| chr11 | 69761501 | 69761696 |
| chr11 | 69761971 | 69762286 |
| chr11 | 69802271 | 69802436 |
| chr11 | 70327001 | 70327396 |
| chr11 | 70494321 | 70494546 |
| chr11 | 70513041 | 70513166 |
| chr11 | 70528711 | 70528886 |
| chr11 | 70544301 | 70544566 |
| chr11 | 70558231 | 70558486 |
| chr11 | 70737801 | 70738056 |
| chr11 | 70751901 | 70752016 |
| chr11 | 72048891 | 72049046 |
| chr11 | 72210491 | 72210746 |
| chr11 | 72249001 | 72249226 |
| chr11 | 72530941 | 72531186 |
| chr11 | 72805401 | 72805556 |
| chr11 | 72898791 | 72898966 |
| chr11 | 74199231 | 74199446 |
| chr11 | 74371691 | 74371956 |
| chr11 | 74388111 | 74388296 |
| chr11 | 74465601 | 74465736 |
| chr11 | 74467201 | 74467456 |
| chr11 | 74496921 | 74497096 |
| chr11 | 74650851 | 74650976 |
| chr11 | 74695251 | 74695646 |
| chr11 | 74828411 | 74828666 |
| chr11 | 74906161 | 74906306 |
| chr11 | 74948131 | 74948446 |
| chr11 | 74972121 | 74972366 |
| chr11 | 75078931 | 75079286 |
| chr11 | 75079291 | 75079616 |
| chr11 | 75139481 | 75139676 |
| chr11 | 75154261 | 75154516 |
| chr11 | 75155021 | 75155166 |
| chr11 | 75165931 | 75166106 |
| chr11 | 75281021 | 75281226 |
| chr11 | 75364141 | 75364346 |
| chr11 | 75472491 | 75472746 |
| chr11 | 75473151 | 75473336 |
| chr11 | 75962591 | 75962846 |
| chr11 | 76185931 | 76186156 |
| chr11 | 76227601 | 76227716 |
| chr11 | 76263631 | 76263766 |
| chr11 | 76523041 | 76523216 |
| chr11 | 76525541 | 76525726 |
| chr11 | 76734241 | 76734536 |
| chr11 | 77184791 | 77184986 |

|       |          |          |
|-------|----------|----------|
| chr11 | 77185251 | 77185406 |
| chr11 | 77197791 | 77197946 |
| chr11 | 77253691 | 77253856 |
| chr11 | 77327971 | 77328226 |
| chr11 | 77328721 | 77329056 |
| chr11 | 77329541 | 77329826 |
| chr11 | 77802911 | 77803056 |
| chr11 | 77994271 | 77994406 |
| chr11 | 78008291 | 78008416 |
| chr11 | 78008531 | 78008676 |
| chr11 | 78024251 | 78024386 |
| chr11 | 78034151 | 78034336 |
| chr11 | 78210511 | 78210816 |
| chr11 | 78225651 | 78225916 |
| chr11 | 78604151 | 78604326 |
| chr11 | 78616411 | 78616596 |
| chr11 | 78781931 | 78782206 |
| chr11 | 78786551 | 78786776 |
| chr11 | 78786811 | 78787086 |
| chr11 | 78855911 | 78856046 |
| chr11 | 78892801 | 78892976 |
| chr11 | 78912681 | 78912936 |
| chr11 | 78923601 | 78923956 |
| chr11 | 78929231 | 78929386 |
| chr11 | 78937761 | 78937896 |
| chr11 | 79043511 | 79043686 |
| chr11 | 79528271 | 79528566 |
| chr11 | 79532301 | 79532526 |
| chr11 | 79537621 | 79537906 |
| chr11 | 79538771 | 79538976 |
| chr11 | 79542971 | 79543296 |
| chr11 | 79543471 | 79543716 |
| chr11 | 79585161 | 79585406 |
| chr11 | 79586931 | 79587046 |
| chr11 | 79606241 | 79606496 |
| chr11 | 79606591 | 79606786 |
| chr11 | 79725361 | 79725616 |
| chr11 | 80023901 | 80024146 |
| chr11 | 80609121 | 80609236 |
| chr11 | 81824651 | 81824806 |
| chr11 | 82675321 | 82675466 |
| chr11 | 82701941 | 82702106 |
| chr11 | 83263011 | 83263126 |
| chr11 | 83275131 | 83275276 |
| chr11 | 83322651 | 83323026 |
| chr11 | 83828941 | 83829086 |
| chr11 | 83841721 | 83841876 |
| chr11 | 83867511 | 83867766 |
| chr11 | 83929251 | 83929416 |
| chr11 | 84343391 | 84343586 |
| chr11 | 84700621 | 84700796 |
| chr11 | 85072411 | 85072656 |
| chr11 | 85305791 | 85306026 |

|       |          |          |
|-------|----------|----------|
| chr11 | 85429521 | 85429856 |
| chr11 | 85660101 | 85660276 |
| chr11 | 85765841 | 85766006 |
| chr11 | 86099311 | 86099566 |
| chr11 | 86392511 | 86392706 |
| chr11 | 86393271 | 86393466 |
| chr11 | 87910691 | 87910926 |
| chr11 | 87961901 | 87962156 |
| chr11 | 88132561 | 88132716 |
| chr11 | 88144361 | 88144686 |
| chr11 | 88327681 | 88327926 |
| chr11 | 88371491 | 88371626 |
| chr11 | 88372371 | 88372716 |
| chr11 | 88695131 | 88695256 |
| chr11 | 88695481 | 88695776 |
| chr11 | 88770741 | 88770996 |
| chr11 | 90057321 | 90057466 |
| chr11 | 90112151 | 90112436 |
| chr11 | 90218701 | 90218946 |
| chr11 | 90243291 | 90243426 |
| chr11 | 93881721 | 93881906 |
| chr11 | 93995991 | 93996126 |
| chr11 | 93996591 | 93996846 |
| chr11 | 93998051 | 93998256 |
| chr11 | 93998641 | 93998996 |
| chr11 | 93999261 | 93999516 |
| chr11 | 94020811 | 94020946 |
| chr11 | 94036731 | 94037006 |
| chr11 | 94064851 | 94064996 |
| chr11 | 94074401 | 94074656 |
| chr11 | 94075031 | 94076036 |
| chr11 | 94126441 | 94126696 |
| chr11 | 94254091 | 94254366 |
| chr11 | 94282781 | 94282946 |
| chr11 | 94327931 | 94328246 |
| chr11 | 94527241 | 94527446 |
| chr11 | 94806691 | 94806866 |
| chr11 | 94855721 | 94855936 |
| chr11 | 94900381 | 94900496 |
| chr11 | 95116091 | 95116396 |
| chr11 | 95198571 | 95199036 |
| chr11 | 95199321 | 95199606 |
| chr11 | 95200921 | 95201406 |
| chr11 | 95210161 | 95210386 |
| chr11 | 95211571 | 95211716 |
| chr11 | 95214741 | 95214996 |
| chr11 | 95225761 | 95225946 |
| chr11 | 95253651 | 95253776 |
| chr11 | 95254111 | 95254356 |
| chr11 | 95274971 | 95275186 |
| chr11 | 95650701 | 95650876 |
| chr11 | 95849941 | 95850206 |
| chr11 | 96688471 | 96688806 |

|       |           |           |
|-------|-----------|-----------|
| chr11 | 96689131  | 96689406  |
| chr11 | 97200251  | 97200556  |
| chr11 | 97274401  | 97274656  |
| chr11 | 97297361  | 97297686  |
| chr11 | 97578211  | 97578346  |
| chr11 | 97579911  | 97580116  |
| chr11 | 97684501  | 97684796  |
| chr11 | 97699551  | 97699806  |
| chr11 | 97700771  | 97701066  |
| chr11 | 98001151  | 98001326  |
| chr11 | 98227681  | 98227866  |
| chr11 | 98425401  | 98425596  |
| chr11 | 98441751  | 98442006  |
| chr11 | 98450611  | 98450826  |
| chr11 | 98557371  | 98557546  |
| chr11 | 98569191  | 98569406  |
| chr11 | 98611111  | 98611546  |
| chr11 | 98790831  | 98791136  |
| chr11 | 98809131  | 98809446  |
| chr11 | 98809651  | 98809906  |
| chr11 | 98817611  | 98817736  |
| chr11 | 98826421  | 98826596  |
| chr11 | 98829271  | 98829546  |
| chr11 | 98832701  | 98833116  |
| chr11 | 98902741  | 98903006  |
| chr11 | 98903191  | 98903446  |
| chr11 | 98904111  | 98904406  |
| chr11 | 98905681  | 98905826  |
| chr11 | 98909341  | 98909596  |
| chr11 | 98917341  | 98917546  |
| chr11 | 98942391  | 98942616  |
| chr11 | 98943451  | 98943756  |
| chr11 | 98943771  | 98944026  |
| chr11 | 98971601  | 98971936  |
| chr11 | 98989411  | 98989636  |
| chr11 | 99003451  | 99003626  |
| chr11 | 99004401  | 99004586  |
| chr11 | 99010491  | 99010616  |
| chr11 | 99043901  | 99044166  |
| chr11 | 99247711  | 99247826  |
| chr11 | 100064831 | 100064966 |
| chr11 | 100067751 | 100067866 |
| chr11 | 100390261 | 100390386 |
| chr11 | 100453921 | 100454176 |
| chr11 | 100471741 | 100471976 |
| chr11 | 100643751 | 100643876 |
| chr11 | 100644301 | 100644536 |
| chr11 | 100683671 | 100683926 |
| chr11 | 100690381 | 100690486 |
| chr11 | 100691121 | 100691366 |
| chr11 | 100694931 | 100695086 |
| chr11 | 100716621 | 100716766 |
| chr11 | 100722581 | 100722766 |

|       |           |           |
|-------|-----------|-----------|
| chr11 | 100813271 | 100813526 |
| chr11 | 100825231 | 100825456 |
| chr11 | 100825611 | 100826016 |
| chr11 | 100827191 | 100827336 |
| chr11 | 100828501 | 100828646 |
| chr11 | 100991601 | 100991786 |
| chr11 | 101023921 | 101024156 |
| chr11 | 101092011 | 101092276 |
| chr11 | 101124151 | 101124316 |
| chr11 | 101124591 | 101124796 |
| chr11 | 101192911 | 101193136 |
| chr11 | 101193311 | 101193836 |
| chr11 | 101195351 | 101196166 |
| chr11 | 101267851 | 101268056 |
| chr11 | 101561991 | 101562136 |
| chr11 | 101913931 | 101914096 |
| chr11 | 101914551 | 101914796 |
| chr11 | 102061361 | 102061466 |
| chr11 | 102082661 | 102082776 |
| chr11 | 102087431 | 102087656 |
| chr11 | 102127031 | 102127186 |
| chr11 | 102139141 | 102139466 |
| chr11 | 102294031 | 102294276 |
| chr11 | 102443521 | 102443746 |
| chr11 | 102471691 | 102471816 |
| chr11 | 102594971 | 102595166 |
| chr11 | 102602671 | 102603036 |
| chr11 | 102609621 | 102609786 |
| chr11 | 102868761 | 102868886 |
| chr11 | 102911501 | 102911746 |
| chr11 | 102912101 | 102912336 |
| chr11 | 102919461 | 102919716 |
| chr11 | 102935001 | 102935296 |
| chr11 | 102975001 | 102975206 |
| chr11 | 102980011 | 102980176 |
| chr11 | 102981851 | 102982036 |
| chr11 | 103002541 | 103002926 |
| chr11 | 103036021 | 103036186 |
| chr11 | 103098401 | 103098516 |
| chr11 | 103218421 | 103218676 |
| chr11 | 103236091 | 103236346 |
| chr11 | 103268821 | 103269026 |
| chr11 | 103753171 | 103753316 |
| chr11 | 103762581 | 103762826 |
| chr11 | 103764221 | 103764346 |
| chr11 | 104177971 | 104178536 |
| chr11 | 104262471 | 104262666 |
| chr11 | 105174611 | 105174876 |
| chr11 | 105177141 | 105177536 |
| chr11 | 105214331 | 105214686 |
| chr11 | 105217851 | 105217986 |
| chr11 | 105800251 | 105800366 |
| chr11 | 105805801 | 105806486 |



|       |           |           |
|-------|-----------|-----------|
| chr11 | 105817661 | 105817776 |
| chr11 | 106074201 | 106074356 |
| chr11 | 106114781 | 106115016 |
| chr11 | 106128291 | 106128476 |
| chr11 | 106128671 | 106129296 |
| chr11 | 106418631 | 106418826 |
| chr11 | 106433431 | 106433586 |
| chr11 | 106441451 | 106441666 |
| chr11 | 106748011 | 106748146 |
| chr11 | 106821571 | 106821746 |
| chr11 | 106824051 | 106824336 |
| chr11 | 106900771 | 106900956 |
| chr11 | 106963811 | 106964086 |
| chr11 | 107240831 | 107241096 |
| chr11 | 107374361 | 107374506 |
| chr11 | 107433781 | 107433926 |
| chr11 | 107781011 | 107781186 |
| chr11 | 108058661 | 108058816 |
| chr11 | 108082351 | 108083226 |
| chr11 | 108083481 | 108083606 |
| chr11 | 108101421 | 108101616 |
| chr11 | 108122811 | 108122946 |
| chr11 | 108290761 | 108290906 |
| chr11 | 109187831 | 109188076 |
| chr11 | 109190381 | 109190496 |
| chr11 | 109209081 | 109209256 |
| chr11 | 109250511 | 109250626 |
| chr11 | 109563571 | 109563776 |
| chr11 | 110281831 | 110281956 |
| chr11 | 110297541 | 110297716 |
| chr11 | 111681121 | 111681316 |
| chr11 | 112472621 | 112472876 |
| chr11 | 112593801 | 112594026 |
| chr11 | 112594061 | 112594286 |
| chr11 | 112695641 | 112695806 |
| chr11 | 112788081 | 112788406 |
| chr11 | 112872271 | 112872386 |
| chr11 | 112976091 | 112976226 |
| chr11 | 113026871 | 113027126 |
| chr11 | 113127051 | 113127166 |
| chr11 | 113144951 | 113145136 |
| chr11 | 113372871 | 113373146 |
| chr11 | 113400421 | 113401186 |
| chr11 | 113472301 | 113472406 |
| chr11 | 113520441 | 113520766 |
| chr11 | 113570101 | 113570476 |
| chr11 | 113570531 | 113570776 |
| chr11 | 113595321 | 113595436 |
| chr11 | 113618161 | 113618306 |
| chr11 | 113638721 | 113638936 |
| chr11 | 114457851 | 114458106 |
| chr11 | 114541071 | 114541276 |
| chr11 | 114958751 | 114958836 |

|       |           |           |
|-------|-----------|-----------|
| chr11 | 115032571 | 115032816 |
| chr11 | 115073441 | 115073696 |
| chr11 | 115080851 | 115081016 |
| chr11 | 115081231 | 115081346 |
| chr11 | 115143531 | 115143746 |
| chr11 | 115461221 | 115461366 |
| chr11 | 115470731 | 115470876 |
| chr11 | 115480161 | 115480516 |
| chr11 | 115525731 | 115525866 |
| chr11 | 115638631 | 115638956 |
| chr11 | 115671821 | 115672086 |
| chr11 | 115719361 | 115719546 |
| chr11 | 115763781 | 115764036 |
| chr11 | 115950111 | 115950246 |
| chr11 | 115961651 | 115961906 |
| chr11 | 115963001 | 115963296 |
| chr11 | 115993921 | 115994056 |
| chr11 | 116040901 | 116041026 |
| chr11 | 116048541 | 116048676 |
| chr11 | 116049221 | 116049346 |
| chr11 | 116056701 | 116056926 |
| chr11 | 116058351 | 116058666 |
| chr11 | 116109301 | 116109426 |
| chr11 | 116385691 | 116385856 |
| chr11 | 116478641 | 116478896 |
| chr11 | 116480521 | 116480646 |
| chr11 | 116481701 | 116482136 |
| chr11 | 116484611 | 116484866 |
| chr11 | 116505501 | 116505636 |
| chr11 | 116509581 | 116509706 |
| chr11 | 116527881 | 116528076 |
| chr11 | 116536181 | 116536326 |
| chr11 | 116543901 | 116544156 |
| chr11 | 116544501 | 116544756 |
| chr11 | 116557401 | 116557826 |
| chr11 | 116615651 | 116615816 |
| chr11 | 116675801 | 116675966 |
| chr11 | 116676011 | 116676316 |
| chr11 | 116681251 | 116681476 |
| chr11 | 116896841 | 116897076 |
| chr11 | 116944311 | 116944466 |
| chr11 | 116944861 | 116945156 |
| chr11 | 116949011 | 116949236 |
| chr11 | 116949311 | 116949536 |
| chr11 | 116949581 | 116949866 |
| chr11 | 116963261 | 116963516 |
| chr11 | 116964781 | 116965086 |
| chr11 | 116979211 | 116979326 |
| chr11 | 116980011 | 116980226 |
| chr11 | 116982031 | 116982386 |
| chr11 | 116982601 | 116982776 |
| chr11 | 116991651 | 116991826 |
| chr11 | 117019581 | 117019836 |

|       |           |           |
|-------|-----------|-----------|
| chr11 | 117139911 | 117140176 |
| chr11 | 117175601 | 117175926 |
| chr11 | 117176121 | 117176276 |
| chr11 | 117192411 | 117192586 |
| chr11 | 117194371 | 117194616 |
| chr11 | 117195151 | 117195426 |
| chr11 | 117276321 | 117276536 |
| chr11 | 117396321 | 117396606 |
| chr11 | 117689431 | 117689766 |
| chr11 | 117743011 | 117743296 |
| chr11 | 117751511 | 117751656 |
| chr11 | 117821081 | 117821336 |
| chr11 | 118054751 | 118054926 |
| chr11 | 118058291 | 118058456 |
| chr11 | 118058991 | 118059166 |
| chr11 | 118059721 | 118059856 |
| chr11 | 118063701 | 118064186 |
| chr11 | 118101151 | 118101716 |
| chr11 | 118103571 | 118103696 |
| chr11 | 118133621 | 118133786 |
| chr11 | 118276581 | 118276706 |
| chr11 | 118277281 | 118277516 |
| chr11 | 118290671 | 118290886 |
| chr11 | 118908041 | 118908326 |
| chr11 | 118940261 | 118940776 |
| chr11 | 118940891 | 118941346 |
| chr11 | 118942981 | 118943096 |
| chr11 | 118943561 | 118944226 |
| chr11 | 118944361 | 118944756 |
| chr11 | 118944771 | 118944886 |
| chr11 | 118945101 | 118945236 |
| chr11 | 118945521 | 118945756 |
| chr11 | 118948611 | 118949516 |
| chr11 | 118988661 | 118989076 |
| chr11 | 119045241 | 119045576 |
| chr11 | 119050331 | 119050486 |
| chr11 | 119053821 | 119053976 |
| chr11 | 119081241 | 119081336 |
| chr11 | 119083591 | 119083756 |
| chr11 | 119476311 | 119476486 |
| chr11 | 119476731 | 119476986 |
| chr11 | 119776801 | 119777026 |
| chr11 | 119796281 | 119796396 |
| chr11 | 119798671 | 119798926 |
| chr11 | 119806491 | 119806806 |
| chr11 | 119811911 | 119812136 |
| chr11 | 119818051 | 119818186 |
| chr11 | 119861321 | 119861516 |
| chr11 | 119867001 | 119867226 |
| chr11 | 119867461 | 119867856 |
| chr11 | 119870661 | 119872626 |
| chr11 | 119998441 | 119998826 |
| chr11 | 119998931 | 119999146 |

|       |           |           |
|-------|-----------|-----------|
| chr11 | 120102351 | 120102756 |
| chr11 | 120102891 | 120103216 |
| chr11 | 120103271 | 120103406 |
| chr11 | 120104361 | 120104726 |
| chr11 | 120110221 | 120110346 |
| chr11 | 120121181 | 120121496 |
| chr11 | 120140881 | 120141416 |
| chr11 | 120141621 | 120141876 |
| chr11 | 120142091 | 120142406 |
| chr11 | 120166111 | 120166326 |
| chr11 | 120356361 | 120356576 |
| chr11 | 120358291 | 120358626 |
| chr11 | 120358651 | 120358906 |
| chr11 | 120359701 | 120359966 |
| chr11 | 120405501 | 120405716 |
| chr11 | 120489211 | 120489576 |
| chr11 | 120593881 | 120594036 |
| chr11 | 120594541 | 120594796 |
| chr11 | 120644901 | 120645026 |
| chr11 | 120669541 | 120669666 |
| chr11 | 120688961 | 120689076 |
| chr11 | 120691921 | 120692076 |
| chr11 | 120699731 | 120699986 |
| chr11 | 120728611 | 120728726 |
| chr11 | 120763791 | 120764066 |
| chr11 | 120765011 | 120765206 |
| chr11 | 120813291 | 120813556 |
| chr11 | 120849721 | 120849916 |
| chr11 | 121005501 | 121005616 |
| chr11 | 121312551 | 121312766 |
| chr11 | 121378021 | 121378196 |
| chr11 | 121379511 | 121379596 |
| chr11 | 121392511 | 121392666 |
| chr11 | 121406011 | 121406206 |
| chr11 | 121411261 | 121411436 |
| chr10 | 3072461   | 3072606   |
| chr10 | 3182821   | 3183106   |
| chr10 | 4730311   | 4730426   |
| chr10 | 5863921   | 5864096   |
| chr10 | 5999371   | 5999576   |
| chr10 | 6021691   | 6021896   |
| chr10 | 6185941   | 6186126   |
| chr10 | 6217191   | 6217366   |
| chr10 | 6280721   | 6280866   |
| chr10 | 8039981   | 8040206   |
| chr10 | 8476411   | 8476776   |
| chr10 | 8537991   | 8538666   |
| chr10 | 8595231   | 8595316   |
| chr10 | 8656181   | 8656306   |
| chr10 | 8671091   | 8671206   |
| chr10 | 9214101   | 9214236   |
| chr10 | 9576651   | 9577076   |
| chr10 | 12067141  | 12067416  |

|       |          |          |
|-------|----------|----------|
| chr10 | 12430451 | 12430606 |
| chr10 | 12533071 | 12533196 |
| chr10 | 12542921 | 12543176 |
| chr10 | 12543291 | 12543646 |
| chr10 | 12543651 | 12543936 |
| chr10 | 12545371 | 12545616 |
| chr10 | 12700851 | 12701026 |
| chr10 | 13004901 | 13005026 |
| chr10 | 13256461 | 13256726 |
| chr10 | 13434571 | 13434746 |
| chr10 | 13459411 | 13459636 |
| chr10 | 13792071 | 13792206 |
| chr10 | 16516951 | 16517096 |
| chr10 | 16714211 | 16714326 |
| chr10 | 16728991 | 16729216 |
| chr10 | 16932831 | 16933086 |
| chr10 | 17087011 | 17087336 |
| chr10 | 17238471 | 17238826 |
| chr10 | 17439951 | 17440116 |
| chr10 | 17446581 | 17446816 |
| chr10 | 17447101 | 17447326 |
| chr10 | 18766561 | 18766696 |
| chr10 | 21293591 | 21293816 |
| chr10 | 23068851 | 23069026 |
| chr10 | 23114621 | 23114736 |
| chr10 | 23200511 | 23200636 |
| chr10 | 23887581 | 23887706 |
| chr10 | 24062911 | 24063026 |
| chr10 | 24116371 | 24116516 |
| chr10 | 24367991 | 24368156 |
| chr10 | 24860191 | 24860486 |
| chr10 | 25089051 | 25089266 |
| chr10 | 25199501 | 25199626 |
| chr10 | 25230251 | 25230446 |
| chr10 | 25433971 | 25434306 |
| chr10 | 25976551 | 25976696 |
| chr10 | 26908301 | 26908426 |
| chr10 | 33847561 | 33847706 |
| chr10 | 33848031 | 33848156 |
| chr10 | 36954041 | 36954406 |
| chr10 | 37084221 | 37084476 |
| chr10 | 38275081 | 38275236 |
| chr10 | 38688221 | 38688336 |
| chr10 | 38689801 | 38690006 |
| chr10 | 39069511 | 39069846 |
| chr10 | 39141151 | 39141286 |
| chr10 | 39207181 | 39207396 |
| chr10 | 39210221 | 39210386 |
| chr10 | 39249791 | 39250046 |
| chr10 | 39262381 | 39262596 |
| chr10 | 39352871 | 39352986 |
| chr10 | 39360891 | 39361016 |
| chr10 | 39366421 | 39366676 |

|       |          |          |
|-------|----------|----------|
| chr10 | 39825921 | 39826056 |
| chr10 | 39844901 | 39845216 |
| chr10 | 40357131 | 40357266 |
| chr10 | 41171081 | 41171196 |
| chr10 | 41295701 | 41295836 |
| chr10 | 41608281 | 41608456 |
| chr10 | 41652631 | 41652856 |
| chr10 | 41721961 | 41722176 |
| chr10 | 41922151 | 41922306 |
| chr10 | 41924831 | 41925236 |
| chr10 | 41934061 | 41934336 |
| chr10 | 41945901 | 41946096 |
| chr10 | 41993711 | 41993796 |
| chr10 | 41994001 | 41994316 |
| chr10 | 43204131 | 43204256 |
| chr10 | 43354531 | 43354816 |
| chr10 | 43726471 | 43726686 |
| chr10 | 43731301 | 43731416 |
| chr10 | 43744481 | 43744876 |
| chr10 | 44324401 | 44324516 |
| chr10 | 44324671 | 44324826 |
| chr10 | 52146521 | 52146656 |
| chr10 | 53154921 | 53155416 |
| chr10 | 53155911 | 53156166 |
| chr10 | 53239241 | 53239366 |
| chr10 | 56157141 | 56157476 |
| chr10 | 58685931 | 58686176 |
| chr10 | 58686461 | 58686686 |
| chr10 | 58699301 | 58699546 |
| chr10 | 58704801 | 58705056 |
| chr10 | 58724411 | 58724646 |
| chr10 | 58833791 | 58833916 |
| chr10 | 59171171 | 59171546 |
| chr10 | 59208881 | 59209066 |
| chr10 | 59307521 | 59307656 |
| chr10 | 59347161 | 59347326 |
| chr10 | 59363941 | 59364116 |
| chr10 | 59378531 | 59378656 |
| chr10 | 59382541 | 59382736 |
| chr10 | 59383841 | 59384326 |
| chr10 | 59415571 | 59416066 |
| chr10 | 59420611 | 59420796 |
| chr10 | 59444581 | 59444676 |
| chr10 | 59543821 | 59543936 |
| chr10 | 59544711 | 59544966 |
| chr10 | 59735671 | 59735846 |
| chr10 | 59742891 | 59743146 |
| chr10 | 59743301 | 59743476 |
| chr10 | 59744821 | 59745156 |
| chr10 | 59759011 | 59759336 |
| chr10 | 59820581 | 59820836 |
| chr10 | 59824001 | 59824226 |
| chr10 | 59834381 | 59834506 |

|       |          |          |
|-------|----------|----------|
| chr10 | 60179891 | 60180046 |
| chr10 | 60268191 | 60268546 |
| chr10 | 60642761 | 60642916 |
| chr10 | 60657561 | 60657716 |
| chr10 | 60695701 | 60696006 |
| chr10 | 60766811 | 60767046 |
| chr10 | 60787271 | 60787416 |
| chr10 | 60820441 | 60820586 |
| chr10 | 60842811 | 60843126 |
| chr10 | 60891491 | 60891776 |
| chr10 | 61090831 | 61090956 |
| chr10 | 61115411 | 61115546 |
| chr10 | 61117301 | 61117516 |
| chr10 | 61183221 | 61183736 |
| chr10 | 61272891 | 61273026 |
| chr10 | 61706931 | 61707076 |
| chr10 | 61980391 | 61980516 |
| chr10 | 62126181 | 62126296 |
| chr10 | 62387011 | 62387156 |
| chr10 | 63382211 | 63382426 |
| chr10 | 66301931 | 66302266 |
| chr10 | 66399701 | 66399936 |
| chr10 | 66400651 | 66400866 |
| chr10 | 66400931 | 66401136 |
| chr10 | 66488351 | 66488566 |
| chr10 | 66510831 | 66511116 |
| chr10 | 66511341 | 66511456 |
| chr10 | 66511621 | 66511876 |
| chr10 | 66516041 | 66516326 |
| chr10 | 66568521 | 66568736 |
| chr10 | 66573931 | 66574046 |
| chr10 | 66688521 | 66688646 |
| chr10 | 66699601 | 66699746 |
| chr10 | 66902181 | 66902346 |
| chr10 | 67218831 | 67219056 |
| chr10 | 67308861 | 67309116 |
| chr10 | 67591301 | 67591566 |
| chr10 | 67642281 | 67642406 |
| chr10 | 67726421 | 67726596 |
| chr10 | 67755901 | 67756136 |
| chr10 | 68674631 | 68675046 |
| chr10 | 68721451 | 68721706 |
| chr10 | 68762941 | 68763126 |
| chr10 | 68784821 | 68784956 |
| chr10 | 68910261 | 68910376 |
| chr10 | 69046711 | 69046956 |
| chr10 | 69052431 | 69052596 |
| chr10 | 69182671 | 69182956 |
| chr10 | 69487811 | 69487926 |
| chr10 | 69581171 | 69581316 |
| chr10 | 69614911 | 69615036 |
| chr10 | 69617291 | 69617446 |
| chr10 | 69698111 | 69698296 |

|       |          |          |
|-------|----------|----------|
| chr10 | 69865461 | 69865726 |
| chr10 | 70338761 | 70339046 |
| chr10 | 70402411 | 70402616 |
| chr10 | 70531681 | 70531936 |
| chr10 | 70655631 | 70655876 |
| chr10 | 75138451 | 75138616 |
| chr10 | 75234991 | 75235126 |
| chr10 | 75317761 | 75318046 |
| chr10 | 75816901 | 75817046 |
| chr10 | 76105191 | 76105306 |
| chr10 | 76157721 | 76157896 |
| chr10 | 76194331 | 76194856 |
| chr10 | 76515421 | 76515696 |
| chr10 | 76560911 | 76561216 |
| chr10 | 76575941 | 76576146 |
| chr10 | 76706041 | 76706216 |
| chr10 | 76706821 | 76706976 |
| chr10 | 76843191 | 76843306 |
| chr10 | 76903601 | 76903756 |
| chr10 | 77096721 | 77096866 |
| chr10 | 77128871 | 77129176 |
| chr10 | 77700001 | 77700266 |
| chr10 | 77760381 | 77760596 |
| chr10 | 77773711 | 77773956 |
| chr10 | 77780441 | 77780606 |
| chr10 | 77808921 | 77809176 |
| chr10 | 77919581 | 77919836 |
| chr10 | 79223421 | 79223706 |
| chr10 | 79324061 | 79324276 |
| chr10 | 79328531 | 79328766 |
| chr10 | 79349031 | 79349196 |
| chr10 | 79354381 | 79354626 |
| chr10 | 79355021 | 79355376 |
| chr10 | 79358241 | 79358496 |
| chr10 | 79358621 | 79359986 |
| chr10 | 79360331 | 79361216 |
| chr10 | 79361351 | 79361606 |
| chr10 | 79377941 | 79378126 |
| chr10 | 79395011 | 79395246 |
| chr10 | 79395441 | 79395556 |
| chr10 | 79395711 | 79396136 |
| chr10 | 79396691 | 79396776 |
| chr10 | 79396831 | 79397276 |
| chr10 | 79398081 | 79398426 |
| chr10 | 79399471 | 79400406 |
| chr10 | 79418471 | 79418596 |
| chr10 | 79561481 | 79561616 |
| chr10 | 79562181 | 79562306 |
| chr10 | 79608181 | 79608346 |
| chr10 | 79691481 | 79691666 |
| chr10 | 79733601 | 79734086 |
| chr10 | 79741751 | 79742106 |
| chr10 | 79743211 | 79743396 |



|       |          |          |
|-------|----------|----------|
| chr10 | 79744171 | 79744336 |
| chr10 | 79764941 | 79765106 |
| chr10 | 79787451 | 79787936 |
| chr10 | 79793941 | 79794166 |
| chr10 | 79796291 | 79796496 |
| chr10 | 79801051 | 79801216 |
| chr10 | 79867811 | 79868036 |
| chr10 | 79875841 | 79876066 |
| chr10 | 80051341 | 80051596 |
| chr10 | 80132491 | 80132696 |
| chr10 | 80134391 | 80134526 |
| chr10 | 80255191 | 80255306 |
| chr10 | 80424771 | 80424956 |
| chr10 | 80520361 | 80520596 |
| chr10 | 80538481 | 80538676 |
| chr10 | 80641741 | 80642036 |
| chr10 | 80781651 | 80781786 |
| chr10 | 80798511 | 80798896 |
| chr10 | 80820671 | 80821016 |
| chr10 | 80850011 | 80850146 |
| chr10 | 80874471 | 80874706 |
| chr10 | 80876651 | 80876906 |
| chr10 | 80878341 | 80878706 |
| chr10 | 80879811 | 80880166 |
| chr10 | 80898751 | 80898896 |
| chr10 | 82218431 | 82218586 |
| chr10 | 82450861 | 82451066 |
| chr10 | 82479551 | 82479956 |
| chr10 | 82525121 | 82525236 |
| chr10 | 82561861 | 82562026 |
| chr10 | 82574881 | 82575116 |
| chr10 | 82579921 | 82580086 |
| chr10 | 82581741 | 82581856 |
| chr10 | 82591201 | 82591416 |
| chr10 | 82603201 | 82603406 |
| chr10 | 82603821 | 82603956 |
| chr10 | 82628451 | 82628666 |
| chr10 | 82628761 | 82628896 |
| chr10 | 82630191 | 82630736 |
| chr10 | 82644431 | 82644756 |
| chr10 | 82705281 | 82705536 |
| chr10 | 82868441 | 82868636 |
| chr10 | 83104591 | 83104896 |
| chr10 | 83110041 | 83110186 |
| chr10 | 84412241 | 84412446 |
| chr10 | 85629631 | 85629776 |
| chr10 | 85804291 | 85804846 |
| chr10 | 86266601 | 86266796 |
| chr10 | 87519821 | 87519996 |
| chr10 | 87688371 | 87688626 |
| chr10 | 87694391 | 87694666 |
| chr10 | 87759911 | 87760076 |
| chr10 | 87815941 | 87816166 |

|       |          |          |
|-------|----------|----------|
| chr10 | 87840591 | 87840746 |
| chr10 | 87903961 | 87904086 |
| chr10 | 87922941 | 87923126 |
| chr10 | 87964751 | 87964996 |
| chr10 | 88900861 | 88901086 |
| chr10 | 89185201 | 89185516 |
| chr10 | 89214111 | 89214246 |
| chr10 | 89232781 | 89232936 |
| chr10 | 90437541 | 90437796 |
| chr10 | 90464261 | 90464596 |
| chr10 | 92395471 | 92395666 |
| chr10 | 92546911 | 92547076 |
| chr10 | 92559091 | 92559306 |
| chr10 | 92724461 | 92724786 |
| chr10 | 92739731 | 92739846 |
| chr10 | 92951881 | 92952036 |
| chr10 | 93508021 | 93508316 |
| chr10 | 93940121 | 93940336 |
| chr10 | 93940391 | 93940646 |
| chr10 | 93966901 | 93967046 |
| chr10 | 93984461 | 93984636 |
| chr10 | 93986581 | 93986766 |
| chr10 | 94011841 | 94012046 |
| chr10 | 94013551 | 94013836 |
| chr10 | 94021551 | 94021716 |
| chr10 | 94035601 | 94035766 |
| chr10 | 94035841 | 94036026 |
| chr10 | 94041701 | 94041886 |
| chr10 | 94367241 | 94367526 |
| chr10 | 94579531 | 94579676 |
| chr10 | 94636911 | 94637186 |
| chr10 | 94662251 | 94662526 |
| chr10 | 94681021 | 94681346 |
| chr10 | 94717311 | 94717536 |
| chr10 | 94780831 | 94781176 |
| chr10 | 94784741 | 94784986 |
| chr10 | 94824261 | 94824516 |
| chr10 | 94824941 | 94825056 |
| chr10 | 94878291 | 94878406 |
| chr10 | 94879931 | 94880106 |
| chr10 | 95017711 | 95017896 |
| chr10 | 95018801 | 95018996 |
| chr10 | 95022491 | 95022626 |
| chr10 | 95022771 | 95023066 |
| chr10 | 95039721 | 95039946 |
| chr10 | 95073641 | 95074276 |
| chr10 | 95140791 | 95140936 |
| chr10 | 95158411 | 95158556 |
| chr10 | 95220881 | 95221106 |
| chr10 | 95236141 | 95236486 |
| chr10 | 95380391 | 95380506 |
| chr10 | 95613281 | 95613636 |
| chr10 | 95636321 | 95636586 |

|       |           |           |
|-------|-----------|-----------|
| chr10 | 95651201  | 95651346  |
| chr10 | 95965521  | 95965666  |
| chr10 | 95998061  | 95998326  |
| chr10 | 96772271  | 96772496  |
| chr10 | 96772801  | 96772926  |
| chr10 | 96775231  | 96775386  |
| chr10 | 96797151  | 96797356  |
| chr10 | 97099681  | 97099906  |
| chr10 | 98320011  | 98320186  |
| chr10 | 98525091  | 98525226  |
| chr10 | 98595611  | 98595866  |
| chr10 | 98609431  | 98609576  |
| chr10 | 98677151  | 98677416  |
| chr10 | 98733561  | 98733716  |
| chr10 | 98818941  | 98819086  |
| chr10 | 99594301  | 99594556  |
| chr10 | 106650741 | 106650986 |
| chr10 | 106652871 | 106653056 |
| chr10 | 106654221 | 106654326 |
| chr10 | 106660881 | 106661006 |
| chr10 | 106661591 | 106661856 |
| chr10 | 106663011 | 106663346 |
| chr10 | 106665201 | 106665286 |
| chr10 | 106667741 | 106668076 |
| chr10 | 106668151 | 106668446 |
| chr10 | 106668741 | 106668956 |
| chr10 | 106673081 | 106673306 |
| chr10 | 106673601 | 106673826 |
| chr10 | 106675671 | 106675776 |
| chr10 | 106677521 | 106677676 |
| chr10 | 106677931 | 106678056 |
| chr10 | 106679501 | 106679776 |
| chr10 | 106682251 | 106682466 |
| chr10 | 106682961 | 106683106 |
| chr10 | 106684421 | 106684666 |
| chr10 | 106687331 | 106687556 |
| chr10 | 106688851 | 106688986 |
| chr10 | 106887081 | 106887166 |
| chr10 | 107828581 | 107828826 |
| chr10 | 110206471 | 110206616 |
| chr10 | 110206741 | 110206976 |
| chr10 | 110375441 | 110375636 |
| chr10 | 110375751 | 110375946 |
| chr10 | 110389431 | 110389676 |
| chr10 | 110768751 | 110768906 |
| chr10 | 110773511 | 110773676 |
| chr10 | 110913891 | 110914206 |
| chr10 | 110949481 | 110949646 |
| chr10 | 111019631 | 111019916 |
| chr10 | 111096081 | 111096296 |
| chr10 | 111244061 | 111244206 |
| chr10 | 114770711 | 114770896 |
| chr10 | 116639971 | 116640286 |

|       |           |           |
|-------|-----------|-----------|
| chr10 | 116724051 | 116724146 |
| chr10 | 116724651 | 116724856 |
| chr10 | 116725411 | 116725546 |
| chr10 | 116725941 | 116726106 |
| chr10 | 116727171 | 116727466 |
| chr10 | 116769221 | 116769346 |
| chr10 | 117343341 | 117343576 |
| chr10 | 117982011 | 117982096 |
| chr10 | 118048411 | 118048566 |
| chr10 | 118050001 | 118050256 |
| chr10 | 118050391 | 118050556 |
| chr10 | 118051281 | 118051546 |
| chr10 | 118053171 | 118053386 |
| chr10 | 118055381 | 118055696 |
| chr10 | 118056231 | 118056376 |
| chr10 | 118056981 | 118057276 |
| chr10 | 118057541 | 118057686 |
| chr10 | 118058151 | 118058366 |
| chr10 | 118058841 | 118059026 |
| chr10 | 118059581 | 118059756 |
| chr10 | 118060151 | 118060406 |
| chr10 | 118441081 | 118441336 |
| chr10 | 118491841 | 118492226 |
| chr10 | 118498541 | 118498696 |
| chr10 | 119814441 | 119814736 |
| chr10 | 119866251 | 119866516 |
| chr10 | 119886801 | 119887036 |
| chr10 | 120074631 | 120074826 |
| chr10 | 120134231 | 120134416 |
| chr10 | 120805891 | 120806166 |
| chr10 | 120830891 | 120831136 |
| chr10 | 120840411 | 120840666 |
| chr10 | 120896331 | 120896576 |
| chr10 | 120942371 | 120942636 |
| chr10 | 121257231 | 121257426 |
| chr10 | 121274351 | 121274466 |
| chr10 | 122324521 | 122324686 |
| chr10 | 122426951 | 122427106 |
| chr10 | 125458211 | 125458336 |
| chr10 | 126364301 | 126364626 |
| chr10 | 126365851 | 126366016 |
| chr10 | 126604751 | 126604896 |
| chr10 | 126636141 | 126636286 |
| chr10 | 126636471 | 126636676 |
| chr10 | 126719931 | 126720166 |
| chr10 | 126732101 | 126732336 |
| chr10 | 126732371 | 126732636 |
| chr10 | 126732981 | 126733186 |
| chr10 | 126733371 | 126733616 |
| chr10 | 126869941 | 126870126 |
| chr10 | 127013701 | 127013826 |
| chr10 | 127014411 | 127014546 |
| chr10 | 127035711 | 127035906 |

|       |           |           |
|-------|-----------|-----------|
| chr10 | 127037511 | 127037906 |
| chr10 | 127049331 | 127049766 |
| chr10 | 127155691 | 127155816 |
| chr10 | 127478741 | 127478856 |
| chr10 | 127711111 | 127711246 |
| chr10 | 127828981 | 127829286 |
| chr10 | 127925011 | 127925266 |
| chr10 | 127925711 | 127925856 |
| chr10 | 127942811 | 127943016 |
| chr10 | 128119881 | 128120016 |
| chr10 | 128346031 | 128346156 |
| chr10 | 128367341 | 128367526 |
| chr10 | 128375481 | 128375616 |
| chr17 | 3036401   | 3036536   |
| chr17 | 3082431   | 3082616   |
| chr17 | 3218421   | 3218586   |
| chr17 | 3437021   | 3437246   |
| chr17 | 4999901   | 5000126   |
| chr17 | 5003491   | 5003626   |
| chr17 | 5004571   | 5004926   |
| chr17 | 5007491   | 5007606   |
| chr17 | 5014231   | 5014396   |
| chr17 | 5089521   | 5089806   |
| chr17 | 5095611   | 5095996   |
| chr17 | 5132361   | 5132796   |
| chr17 | 5132971   | 5133086   |
| chr17 | 5187951   | 5188126   |
| chr17 | 5204111   | 5204456   |
| chr17 | 5206691   | 5206896   |
| chr17 | 5212221   | 5212386   |
| chr17 | 5423151   | 5423366   |
| chr17 | 5736781   | 5736896   |
| chr17 | 5853441   | 5853636   |
| chr17 | 5872661   | 5872836   |
| chr17 | 5885601   | 5885776   |
| chr17 | 5909501   | 5909616   |
| chr17 | 5934971   | 5935126   |
| chr17 | 5936231   | 5936556   |
| chr17 | 6082761   | 6082966   |
| chr17 | 6956771   | 6957006   |
| chr17 | 7880061   | 7880276   |
| chr17 | 8475531   | 8475716   |
| chr17 | 8477541   | 8477796   |
| chr17 | 9005241   | 9005556   |
| chr17 | 10523291  | 10523416  |
| chr17 | 10643431  | 10643686  |
| chr17 | 10693921  | 10694236  |
| chr17 | 10891061  | 10891206  |
| chr17 | 12274071  | 12274216  |
| chr17 | 12337021  | 12337136  |
| chr17 | 12351871  | 12352276  |
| chr17 | 12354351  | 12354536  |
| chr17 | 12361671  | 12361926  |

|       |          |          |
|-------|----------|----------|
| chr17 | 12362151 | 12362386 |
| chr17 | 12402781 | 12402906 |
| chr17 | 12403101 | 12403276 |
| chr17 | 12406971 | 12407156 |
| chr17 | 12460181 | 12460336 |
| chr17 | 12472781 | 12473036 |
| chr17 | 12493221 | 12493406 |
| chr17 | 12509181 | 12509396 |
| chr17 | 12764331 | 12764546 |
| chr17 | 12881331 | 12881586 |
| chr17 | 12983291 | 12983746 |
| chr17 | 12985281 | 12985446 |
| chr17 | 12987481 | 12987706 |
| chr17 | 13079981 | 13080406 |
| chr17 | 13088551 | 13088696 |
| chr17 | 13133931 | 13134046 |
| chr17 | 13498671 | 13499186 |
| chr17 | 13744491 | 13744616 |
| chr17 | 13836791 | 13837086 |
| chr17 | 13898391 | 13898696 |
| chr17 | 14004261 | 14004766 |
| chr17 | 14381711 | 14381936 |
| chr17 | 14688721 | 14688846 |
| chr17 | 14736711 | 14736946 |
| chr17 | 14777501 | 14777636 |
| chr17 | 14778041 | 14778156 |
| chr17 | 14851981 | 14852226 |
| chr17 | 14908481 | 14908736 |
| chr17 | 15966931 | 15967166 |
| chr17 | 16202771 | 16202916 |
| chr17 | 17653721 | 17653936 |
| chr17 | 17754251 | 17754456 |
| chr17 | 23870571 | 23870856 |
| chr17 | 23876371 | 23876526 |
| chr17 | 23951971 | 23952296 |
| chr17 | 24005661 | 24005796 |
| chr17 | 24174121 | 24174296 |
| chr17 | 24340031 | 24340146 |
| chr17 | 24349271 | 24349526 |
| chr17 | 24358131 | 24358466 |
| chr17 | 24566121 | 24566476 |
| chr17 | 24810851 | 24811036 |
| chr17 | 24879071 | 24879316 |
| chr17 | 25201191 | 25201496 |
| chr17 | 25766941 | 25767166 |
| chr17 | 25795491 | 25795696 |
| chr17 | 25974061 | 25974276 |
| chr17 | 25976461 | 25976616 |
| chr17 | 25976651 | 25976806 |
| chr17 | 26177571 | 26178016 |
| chr17 | 26180701 | 26180956 |
| chr17 | 26362361 | 26362516 |
| chr17 | 26374771 | 26375066 |

|       |          |          |
|-------|----------|----------|
| chr17 | 26714531 | 26714686 |
| chr17 | 26719831 | 26720126 |
| chr17 | 26744011 | 26744136 |
| chr17 | 26758391 | 26758526 |
| chr17 | 26823781 | 26823986 |
| chr17 | 26824171 | 26824306 |
| chr17 | 26831011 | 26831516 |
| chr17 | 26842731 | 26842986 |
| chr17 | 27200771 | 27201016 |
| chr17 | 27251271 | 27251436 |
| chr17 | 27263581 | 27263766 |
| chr17 | 27269021 | 27269386 |
| chr17 | 27291181 | 27291586 |
| chr17 | 27307581 | 27307766 |
| chr17 | 27307771 | 27308026 |
| chr17 | 27379411 | 27379576 |
| chr17 | 27379671 | 27379876 |
| chr17 | 27383001 | 27383166 |
| chr17 | 27454061 | 27454806 |
| chr17 | 27519941 | 27520086 |
| chr17 | 27553691 | 27553856 |
| chr17 | 27650381 | 27650536 |
| chr17 | 27700771 | 27700946 |
| chr17 | 27724331 | 27724536 |
| chr17 | 27728501 | 27728816 |
| chr17 | 27729571 | 27729776 |
| chr17 | 27729971 | 27730186 |
| chr17 | 27733071 | 27733706 |
| chr17 | 27735921 | 27736036 |
| chr17 | 27739581 | 27739696 |
| chr17 | 27740851 | 27741266 |
| chr17 | 27750101 | 27750356 |
| chr17 | 27758111 | 27758306 |
| chr17 | 27934181 | 27934796 |
| chr17 | 27937991 | 27938256 |
| chr17 | 28012191 | 28012356 |
| chr17 | 28012571 | 28012756 |
| chr17 | 28063331 | 28063496 |
| chr17 | 28144101 | 28144456 |
| chr17 | 28144701 | 28145136 |
| chr17 | 28145501 | 28145816 |
| chr17 | 28147551 | 28147726 |
| chr17 | 28149941 | 28150056 |
| chr17 | 28160281 | 28160536 |
| chr17 | 28165281 | 28165506 |
| chr17 | 28310011 | 28310266 |
| chr17 | 28334801 | 28334936 |
| chr17 | 28342101 | 28342616 |
| chr17 | 28370971 | 28371296 |
| chr17 | 28373801 | 28374236 |
| chr17 | 28390031 | 28390466 |
| chr17 | 28391371 | 28391486 |
| chr17 | 28409081 | 28409446 |

|       |          |          |
|-------|----------|----------|
| chr17 | 28414791 | 28415006 |
| chr17 | 28417041 | 28417706 |
| chr17 | 28548311 | 28548696 |
| chr17 | 28565381 | 28565836 |
| chr17 | 28583751 | 28583966 |
| chr17 | 28607361 | 28607656 |
| chr17 | 28619511 | 28619746 |
| chr17 | 28628611 | 28628786 |
| chr17 | 28639411 | 28639666 |
| chr17 | 28653041 | 28653196 |
| chr17 | 28834811 | 28835056 |
| chr17 | 28895791 | 28896156 |
| chr17 | 28973891 | 28974146 |
| chr17 | 29011801 | 29012066 |
| chr17 | 29067371 | 29067626 |
| chr17 | 29190261 | 29190416 |
| chr17 | 29195821 | 29196006 |
| chr17 | 29213071 | 29213326 |
| chr17 | 29233551 | 29233666 |
| chr17 | 29271091 | 29271586 |
| chr17 | 29271691 | 29271846 |
| chr17 | 29272001 | 29272096 |
| chr17 | 29272111 | 29272256 |
| chr17 | 29294061 | 29294356 |
| chr17 | 29323441 | 29323586 |
| chr17 | 29390601 | 29390806 |
| chr17 | 29474051 | 29474246 |
| chr17 | 29476851 | 29476996 |
| chr17 | 29477701 | 29477926 |
| chr17 | 29493151 | 29493376 |
| chr17 | 29557061 | 29557276 |
| chr17 | 29693351 | 29693506 |
| chr17 | 29737991 | 29738276 |
| chr17 | 30134651 | 30134906 |
| chr17 | 30378541 | 30378656 |
| chr17 | 30399721 | 30399986 |
| chr17 | 30593441 | 30593576 |
| chr17 | 30746221 | 30746346 |
| chr17 | 30746601 | 30746826 |
| chr17 | 31014501 | 31014706 |
| chr17 | 31174691 | 31174926 |
| chr17 | 31672831 | 31673006 |
| chr17 | 31715131 | 31715306 |
| chr17 | 31720781 | 31720936 |
| chr17 | 31866091 | 31866296 |
| chr17 | 31885971 | 31886246 |
| chr17 | 31927791 | 31928056 |
| chr17 | 31959771 | 31959916 |
| chr17 | 31978951 | 31979206 |
| chr17 | 31990041 | 31990416 |
| chr17 | 31990561 | 31990716 |
| chr17 | 31999121 | 31999316 |
| chr17 | 32050971 | 32051176 |



|       |          |          |
|-------|----------|----------|
| chr17 | 32054171 | 32054336 |
| chr17 | 32161861 | 32162016 |
| chr17 | 32346111 | 32346326 |
| chr17 | 32346521 | 32346776 |
| chr17 | 32366461 | 32366666 |
| chr17 | 32519941 | 32520106 |
| chr17 | 32917261 | 32917526 |
| chr17 | 32921131 | 32921356 |
| chr17 | 33806871 | 33806996 |
| chr17 | 33892181 | 33892616 |
| chr17 | 33910671 | 33910786 |
| chr17 | 34039051 | 34039206 |
| chr17 | 34039421 | 34039626 |
| chr17 | 34263671 | 34263996 |
| chr17 | 34266771 | 34266886 |
| chr17 | 34324931 | 34325096 |
| chr17 | 34342611 | 34342776 |
| chr17 | 34773801 | 34773936 |
| chr17 | 34781121 | 34781516 |
| chr17 | 34782961 | 34783176 |
| chr17 | 34788251 | 34788376 |
| chr17 | 34811581 | 34811916 |
| chr17 | 34820211 | 34820426 |
| chr17 | 34820591 | 34820886 |
| chr17 | 34827591 | 34827846 |
| chr17 | 34999141 | 34999386 |
| chr17 | 35032221 | 35032406 |
| chr17 | 35048911 | 35049066 |
| chr17 | 35101311 | 35101566 |
| chr17 | 35200661 | 35200856 |
| chr17 | 35201801 | 35202156 |
| chr17 | 35277461 | 35277896 |
| chr17 | 35293271 | 35293396 |
| chr17 | 35298111 | 35298386 |
| chr17 | 35370501 | 35370616 |
| chr17 | 35377751 | 35377906 |
| chr17 | 35641971 | 35642096 |
| chr17 | 35685851 | 35686006 |
| chr17 | 35689091 | 35689276 |
| chr17 | 35797301 | 35797466 |
| chr17 | 35873081 | 35873266 |
| chr17 | 35896951 | 35897096 |
| chr17 | 35948251 | 35948426 |
| chr17 | 36048221 | 36048486 |
| chr17 | 39980951 | 39981456 |
| chr17 | 39982501 | 39982616 |
| chr17 | 39984231 | 39984366 |
| chr17 | 43765191 | 43765376 |
| chr17 | 43895551 | 43895916 |
| chr17 | 44511141 | 44511276 |
| chr17 | 44700531 | 44700696 |
| chr17 | 45270841 | 45271036 |
| chr17 | 45369651 | 45369816 |

|       |          |          |
|-------|----------|----------|
| chr17 | 45381441 | 45381666 |
| chr17 | 45722401 | 45722626 |
| chr17 | 45726931 | 45727136 |
| chr17 | 45728701 | 45729086 |
| chr17 | 45838891 | 45839006 |
| chr17 | 45879391 | 45879826 |
| chr17 | 45879831 | 45880416 |
| chr17 | 45902921 | 45903276 |
| chr17 | 45907931 | 45908086 |
| chr17 | 45915521 | 45915746 |
| chr17 | 45985671 | 45985836 |
| chr17 | 46008811 | 46009166 |
| chr17 | 46017161 | 46017396 |
| chr17 | 46030301 | 46030526 |
| chr17 | 46033571 | 46033756 |
| chr17 | 46076591 | 46076736 |
| chr17 | 46140971 | 46141106 |
| chr17 | 46141251 | 46141476 |
| chr17 | 46152541 | 46152666 |
| chr17 | 46152941 | 46153156 |
| chr17 | 46155041 | 46155436 |
| chr17 | 46155541 | 46155716 |
| chr17 | 46156201 | 46156586 |
| chr17 | 46157711 | 46157966 |
| chr17 | 46159081 | 46159306 |
| chr17 | 46160381 | 46160606 |
| chr17 | 46161631 | 46162116 |
| chr17 | 46162561 | 46162856 |
| chr17 | 46163051 | 46163536 |
| chr17 | 46165311 | 46165486 |
| chr17 | 46178931 | 46179086 |
| chr17 | 46188031 | 46188346 |
| chr17 | 46193361 | 46193666 |
| chr17 | 46214501 | 46214766 |
| chr17 | 46215261 | 46215516 |
| chr17 | 46220831 | 46221086 |
| chr17 | 46252541 | 46252676 |
| chr17 | 46255341 | 46255686 |
| chr17 | 46357261 | 46357386 |
| chr17 | 46398601 | 46398926 |
| chr17 | 46406401 | 46406796 |
| chr17 | 46407261 | 46407496 |
| chr17 | 46438961 | 46439096 |
| chr17 | 46746891 | 46747016 |
| chr17 | 46761701 | 46761946 |
| chr17 | 46776261 | 46776516 |
| chr17 | 46804721 | 46804986 |
| chr17 | 46843641 | 46843786 |
| chr17 | 46843921 | 46844046 |
| chr17 | 46851421 | 46851556 |
| chr17 | 46863021 | 46863316 |
| chr17 | 46865751 | 46866336 |
| chr17 | 46945991 | 46946166 |

|       |          |          |
|-------|----------|----------|
| chr17 | 46969001 | 46969256 |
| chr17 | 46979591 | 46979896 |
| chr17 | 46990251 | 46990486 |
| chr17 | 47066881 | 47067166 |
| chr17 | 47126051 | 47126216 |
| chr17 | 47197161 | 47197396 |
| chr17 | 47202401 | 47202596 |
| chr17 | 47443111 | 47443316 |
| chr17 | 47520261 | 47520406 |
| chr17 | 47647811 | 47647986 |
| chr17 | 47891271 | 47891756 |
| chr17 | 47891851 | 47891946 |
| chr17 | 47896611 | 47897066 |
| chr17 | 47899211 | 47899456 |
| chr17 | 47917401 | 47917506 |
| chr17 | 47978671 | 47978946 |
| chr17 | 49466521 | 49466716 |
| chr17 | 49569661 | 49569786 |
| chr17 | 49572961 | 49573246 |
| chr17 | 49579631 | 49579886 |
| chr17 | 49653341 | 49653516 |
| chr17 | 49896051 | 49896406 |
| chr17 | 49918541 | 49918736 |
| chr17 | 49938931 | 49939166 |
| chr17 | 53683681 | 53683876 |
| chr17 | 53805371 | 53805506 |
| chr17 | 56135561 | 56135876 |
| chr17 | 56238591 | 56238866 |
| chr17 | 56239581 | 56239866 |
| chr17 | 56242381 | 56242676 |
| chr17 | 56243351 | 56243576 |
| chr17 | 56249461 | 56249576 |
| chr17 | 56259771 | 56260116 |
| chr17 | 56325231 | 56325556 |
| chr17 | 56347731 | 56347916 |
| chr17 | 56419121 | 56419406 |
| chr17 | 56474081 | 56474306 |
| chr17 | 56479641 | 56479786 |
| chr17 | 56487381 | 56487586 |
| chr17 | 56495071 | 56495276 |
| chr17 | 56541011 | 56541186 |
| chr17 | 56546861 | 56547116 |
| chr17 | 56554171 | 56554476 |
| chr17 | 56607571 | 56607946 |
| chr17 | 56617711 | 56617846 |
| chr17 | 56702131 | 56702366 |
| chr17 | 56702821 | 56703086 |
| chr17 | 56902421 | 56902696 |
| chr17 | 57028631 | 57028806 |
| chr17 | 57047421 | 57047696 |
| chr17 | 57363001 | 57363136 |
| chr17 | 57363211 | 57363676 |
| chr17 | 57363931 | 57364186 |

|       |          |          |
|-------|----------|----------|
| chr17 | 57394231 | 57394476 |
| chr17 | 57395001 | 57395116 |
| chr17 | 62868341 | 62868476 |
| chr17 | 62906671 | 62906866 |
| chr17 | 62914081 | 62914246 |
| chr17 | 62941041 | 62941366 |
| chr17 | 63007241 | 63007496 |
| chr17 | 63045931 | 63046196 |
| chr17 | 63058131 | 63058216 |
| chr17 | 63102561 | 63103036 |
| chr17 | 63141841 | 63142026 |
| chr17 | 63199321 | 63199516 |
| chr17 | 63360301 | 63360556 |
| chr17 | 63634761 | 63634906 |
| chr17 | 63711161 | 63711376 |
| chr17 | 63715341 | 63715636 |
| chr17 | 63814201 | 63814426 |
| chr17 | 64551971 | 64552226 |
| chr17 | 64942101 | 64942256 |
| chr17 | 65009231 | 65009366 |
| chr17 | 65064241 | 65064516 |
| chr17 | 65066041 | 65066276 |
| chr17 | 65066481 | 65066596 |
| chr17 | 65101741 | 65101996 |
| chr17 | 65957491 | 65957636 |
| chr17 | 66118241 | 66118446 |
| chr17 | 66131331 | 66131506 |
| chr17 | 66138371 | 66138786 |
| chr17 | 66138921 | 66139086 |
| chr17 | 66446861 | 66447086 |
| chr17 | 66724181 | 66724306 |
| chr17 | 68344321 | 68344436 |
| chr17 | 68715401 | 68715546 |
| chr17 | 69550601 | 69550846 |
| chr17 | 70050821 | 70050976 |
| chr17 | 71244321 | 71244556 |
| chr17 | 71347331 | 71347496 |
| chr17 | 71636561 | 71636816 |
| chr17 | 71637181 | 71637696 |
| chr17 | 72024201 | 72024476 |
| chr17 | 73212711 | 73212856 |
| chr17 | 73306631 | 73306836 |
| chr17 | 73436331 | 73436566 |
| chr17 | 73762461 | 73762586 |
| chr17 | 74232901 | 74233146 |
| chr17 | 74242711 | 74242826 |
| chr17 | 74976531 | 74976756 |
| chr17 | 75111211 | 75111426 |
| chr17 | 75245631 | 75245756 |
| chr17 | 75282571 | 75282786 |
| chr17 | 75414781 | 75415166 |
| chr17 | 75419041 | 75419206 |
| chr17 | 75451161 | 75451416 |

|       |          |          |
|-------|----------|----------|
| chr17 | 75576561 | 75576846 |
| chr17 | 75595701 | 75595896 |
| chr17 | 75600971 | 75601126 |
| chr17 | 75606221 | 75606476 |
| chr17 | 75727781 | 75728026 |
| chr17 | 75768691 | 75768856 |
| chr17 | 75912581 | 75912766 |
| chr17 | 75918791 | 75918986 |
| chr17 | 77617921 | 77618056 |
| chr17 | 78620721 | 78621016 |
| chr17 | 78663481 | 78663736 |
| chr17 | 78668471 | 78669186 |
| chr17 | 78669541 | 78669696 |
| chr17 | 78671361 | 78671576 |
| chr17 | 79007591 | 79007856 |
| chr17 | 79045561 | 79045756 |
| chr17 | 79126091 | 79126306 |
| chr17 | 79126501 | 79126796 |
| chr17 | 79388501 | 79388676 |
| chr17 | 79427941 | 79428146 |
| chr17 | 79846571 | 79846816 |
| chr17 | 79862131 | 79862286 |
| chr17 | 79894671 | 79894826 |
| chr17 | 80009801 | 80010256 |
| chr17 | 80047591 | 80047706 |
| chr17 | 80101921 | 80102166 |
| chr17 | 80137191 | 80137306 |
| chr17 | 80146291 | 80146526 |
| chr17 | 80155321 | 80155536 |
| chr17 | 80169561 | 80169776 |
| chr17 | 80184011 | 80184266 |
| chr17 | 80186141 | 80186326 |
| chr17 | 80197711 | 80197836 |
| chr17 | 80275841 | 80276036 |
| chr17 | 80292341 | 80292776 |
| chr17 | 80325891 | 80326026 |
| chr17 | 80338061 | 80338316 |
| chr17 | 80350271 | 80350396 |
| chr17 | 80360791 | 80361026 |
| chr17 | 80371361 | 80371526 |
| chr17 | 80528111 | 80528366 |
| chr17 | 80547431 | 80547586 |
| chr17 | 80547981 | 80548236 |
| chr17 | 81085321 | 81085576 |
| chr17 | 81117661 | 81117826 |
| chr17 | 81128001 | 81128146 |
| chr17 | 81159941 | 81160076 |
| chr17 | 81219101 | 81219326 |
| chr17 | 81233141 | 81233276 |
| chr17 | 81240601 | 81240736 |
| chr17 | 81287061 | 81287436 |
| chr17 | 81297821 | 81297996 |
| chr17 | 81879811 | 81880076 |

|       |          |          |
|-------|----------|----------|
| chr17 | 81891951 | 81892076 |
| chr17 | 82017901 | 82018006 |
| chr17 | 83498421 | 83498576 |
| chr17 | 83547971 | 83548086 |
| chr17 | 83575601 | 83575746 |
| chr17 | 83575851 | 83576216 |
| chr17 | 83576471 | 83576696 |
| chr17 | 83577931 | 83578386 |
| chr17 | 83581391 | 83581586 |
| chr17 | 83668171 | 83668326 |
| chr17 | 83721991 | 83722316 |
| chr17 | 83747751 | 83747936 |
| chr17 | 83781421 | 83781536 |
| chr17 | 83784911 | 83785166 |
| chr17 | 84170781 | 84170976 |
| chr17 | 84211521 | 84211946 |
| chr17 | 84272741 | 84273176 |
| chr17 | 84279571 | 84279946 |
| chr17 | 84288531 | 84288916 |
| chr17 | 84289661 | 84290106 |
| chr17 | 84291001 | 84291266 |
| chr17 | 84296661 | 84296916 |
| chr17 | 84337051 | 84337306 |
| chr17 | 84391221 | 84391336 |
| chr17 | 84401581 | 84401756 |
| chr17 | 84402211 | 84402326 |
| chr17 | 84448591 | 84448816 |
| chr17 | 84478251 | 84478466 |
| chr17 | 84488361 | 84488576 |
| chr17 | 84767341 | 84767566 |
| chr17 | 84778331 | 84778476 |
| chr17 | 84801221 | 84801616 |
| chr17 | 84910681 | 84910856 |
| chr17 | 85010761 | 85010966 |
| chr17 | 85388671 | 85388866 |
| chr17 | 85828261 | 85828376 |
| chr17 | 86598681 | 86598846 |
| chr17 | 86601271 | 86601466 |
| chr17 | 86602681 | 86603046 |
| chr17 | 86603531 | 86603726 |
| chr17 | 86631401 | 86631606 |
| chr17 | 86649531 | 86649646 |
| chr17 | 86653841 | 86653986 |
| chr17 | 86662661 | 86662786 |
| chr17 | 86692401 | 86692656 |
| chr17 | 86750241 | 86750636 |
| chr17 | 86904681 | 86904876 |
| chr17 | 86906941 | 86907266 |
| chr17 | 86919301 | 86919426 |
| chr17 | 86922011 | 86922256 |
| chr17 | 86931901 | 86932096 |
| chr17 | 86932441 | 86932616 |
| chr17 | 87026221 | 87026476 |

|       |          |          |
|-------|----------|----------|
| chr17 | 87137791 | 87137956 |
| chr17 | 87322711 | 87322856 |
| chr17 | 87382111 | 87382346 |
| chr17 | 87407851 | 87408146 |
| chr17 | 87449731 | 87449986 |
| chr17 | 87575781 | 87575896 |
| chr17 | 87685501 | 87685646 |
| chr17 | 87686051 | 87686226 |
| chr17 | 87687611 | 87687936 |
| chr17 | 87703671 | 87704006 |
| chr17 | 87704151 | 87704706 |
| chr17 | 87750921 | 87751176 |
| chr17 | 87775351 | 87775576 |
| chr17 | 87780501 | 87780626 |
| chr17 | 87796441 | 87796716 |
| chr17 | 87848071 | 87848386 |
| chr17 | 87877081 | 87877326 |
| chr17 | 87931181 | 87931326 |
| chr17 | 88373191 | 88373446 |
| chr17 | 88373901 | 88374146 |
| chr17 | 88381391 | 88381596 |
| chr17 | 88531651 | 88532046 |
| chr17 | 88532121 | 88532246 |
| chr17 | 88532391 | 88532586 |
| chr17 | 88673791 | 88673996 |
| chr17 | 88770431 | 88770626 |
| chr17 | 88908061 | 88908416 |
| chr17 | 88955581 | 88955886 |
| chr17 | 89012791 | 89012926 |
| chr16 | 4508701  | 4508836  |
| chr16 | 4599571  | 4599696  |
| chr16 | 4622041  | 4622236  |
| chr16 | 4903571  | 4903816  |
| chr16 | 5241641  | 5241756  |
| chr16 | 8663391  | 8663546  |
| chr16 | 8663901  | 8664116  |
| chr16 | 8839611  | 8839766  |
| chr16 | 10746001 | 10746136 |
| chr16 | 10846061 | 10846276 |
| chr16 | 11069391 | 11069726 |
| chr16 | 11069891 | 11070126 |
| chr16 | 11070531 | 11070706 |
| chr16 | 11087031 | 11087146 |
| chr16 | 11544201 | 11544446 |
| chr16 | 11665241 | 11665366 |
| chr16 | 11815481 | 11815626 |
| chr16 | 13557161 | 13557436 |
| chr16 | 15083681 | 15083846 |
| chr16 | 15981821 | 15982006 |
| chr16 | 17930641 | 17930766 |
| chr16 | 18083651 | 18083776 |
| chr16 | 18084441 | 18084696 |
| chr16 | 18089141 | 18089306 |

|       |          |          |
|-------|----------|----------|
| chr16 | 18538281 | 18538536 |
| chr16 | 18597621 | 18597866 |
| chr16 | 20324191 | 20324416 |
| chr16 | 20404241 | 20404386 |
| chr16 | 20686371 | 20686516 |
| chr16 | 20694981 | 20695136 |
| chr16 | 21286161 | 21286346 |
| chr16 | 21499881 | 21500026 |
| chr16 | 21637531 | 21637706 |
| chr16 | 21644351 | 21644566 |
| chr16 | 21955631 | 21955886 |
| chr16 | 22122811 | 22123066 |
| chr16 | 22150011 | 22150266 |
| chr16 | 22766821 | 22767166 |
| chr16 | 22877901 | 22878016 |
| chr16 | 23149951 | 23150096 |
| chr16 | 23517711 | 23518256 |
| chr16 | 23963761 | 23964156 |
| chr16 | 23972311 | 23972776 |
| chr16 | 23980181 | 23980366 |
| chr16 | 23982741 | 23983166 |
| chr16 | 23983531 | 23983816 |
| chr16 | 24056751 | 24056986 |
| chr16 | 24137231 | 24137406 |
| chr16 | 24165701 | 24165956 |
| chr16 | 24166151 | 24166266 |
| chr16 | 24193271 | 24193596 |
| chr16 | 24238481 | 24238826 |
| chr16 | 24282431 | 24282626 |
| chr16 | 24367861 | 24368016 |
| chr16 | 24489721 | 24489906 |
| chr16 | 24619701 | 24619816 |
| chr16 | 24859851 | 24860026 |
| chr16 | 24932561 | 24932816 |
| chr16 | 24990191 | 24990326 |
| chr16 | 24991371 | 24991616 |
| chr16 | 25053031 | 25053146 |
| chr16 | 25792601 | 25793026 |
| chr16 | 26306021 | 26306176 |
| chr16 | 26523421 | 26523626 |
| chr16 | 29640361 | 29640476 |
| chr16 | 29743021 | 29743196 |
| chr16 | 29761231 | 29761616 |
| chr16 | 29767611 | 29767756 |
| chr16 | 29817261 | 29817406 |
| chr16 | 29960361 | 29960526 |
| chr16 | 29992001 | 29992256 |
| chr16 | 29992351 | 29992506 |
| chr16 | 29994171 | 29994276 |
| chr16 | 30171931 | 30172046 |
| chr16 | 30190691 | 30190816 |
| chr16 | 30193841 | 30193996 |
| chr16 | 30195201 | 30195376 |



|       |          |          |
|-------|----------|----------|
| chr16 | 30602841 | 30603006 |
| chr16 | 30709711 | 30709906 |
| chr16 | 30720841 | 30721236 |
| chr16 | 30744171 | 30744396 |
| chr16 | 30745551 | 30745686 |
| chr16 | 30746601 | 30746736 |
| chr16 | 30746891 | 30747226 |
| chr16 | 30749381 | 30749636 |
| chr16 | 30763221 | 30763416 |
| chr16 | 30776461 | 30776576 |
| chr16 | 30820841 | 30820966 |
| chr16 | 30821451 | 30821636 |
| chr16 | 30934481 | 30934716 |
| chr16 | 30981521 | 30981716 |
| chr16 | 31008431 | 31008546 |
| chr16 | 31008871 | 31009046 |
| chr16 | 31061391 | 31061566 |
| chr16 | 31193041 | 31193136 |
| chr16 | 31493781 | 31493996 |
| chr16 | 31494161 | 31494406 |
| chr16 | 31496061 | 31496206 |
| chr16 | 31740421 | 31740606 |
| chr16 | 31870621 | 31870916 |
| chr16 | 32088771 | 32088906 |
| chr16 | 32238351 | 32238676 |
| chr16 | 32657061 | 32657176 |
| chr16 | 32665871 | 32665986 |
| chr16 | 32670631 | 32670786 |
| chr16 | 32945431 | 32945556 |
| chr16 | 33454211 | 33454396 |
| chr16 | 33467951 | 33468086 |
| chr16 | 33538351 | 33538466 |
| chr16 | 33697611 | 33698046 |
| chr16 | 33944761 | 33945026 |
| chr16 | 34116691 | 34116946 |
| chr16 | 34120951 | 34121346 |
| chr16 | 34269721 | 34269946 |
| chr16 | 34400131 | 34400256 |
| chr16 | 34783541 | 34783766 |
| chr16 | 34807931 | 34808316 |
| chr16 | 34960511 | 34960686 |
| chr16 | 34986481 | 34986716 |
| chr16 | 35000971 | 35001266 |
| chr16 | 35047881 | 35048096 |
| chr16 | 35117651 | 35117776 |
| chr16 | 35178491 | 35178706 |
| chr16 | 35473141 | 35473306 |
| chr16 | 35577801 | 35577966 |
| chr16 | 35747571 | 35747866 |
| chr16 | 35932751 | 35933056 |
| chr16 | 35933091 | 35933346 |
| chr16 | 36068601 | 36068846 |
| chr16 | 37795881 | 37796056 |

|       |          |          |
|-------|----------|----------|
| chr16 | 37843921 | 37844206 |
| chr16 | 37871761 | 37871936 |
| chr16 | 37953891 | 37954106 |
| chr16 | 38033061 | 38033206 |
| chr16 | 38599371 | 38599586 |
| chr16 | 38636711 | 38637176 |
| chr16 | 38700531 | 38700756 |
| chr16 | 38741431 | 38741556 |
| chr16 | 43235481 | 43235596 |
| chr16 | 43364851 | 43365056 |
| chr16 | 43397101 | 43397266 |
| chr16 | 43464911 | 43465056 |
| chr16 | 43549891 | 43550256 |
| chr16 | 43573621 | 43573936 |
| chr16 | 43624491 | 43624646 |
| chr16 | 43981041 | 43981216 |
| chr16 | 44167851 | 44167966 |
| chr16 | 44168271 | 44168526 |
| chr16 | 44526511 | 44526696 |
| chr16 | 44632411 | 44632526 |
| chr16 | 44757821 | 44758176 |
| chr16 | 45036981 | 45037326 |
| chr16 | 45999481 | 45999796 |
| chr16 | 49980311 | 49980506 |
| chr16 | 50221401 | 50221816 |
| chr16 | 52008711 | 52008816 |
| chr16 | 52042841 | 52043136 |
| chr16 | 52043941 | 52044176 |
| chr16 | 52051361 | 52051656 |
| chr16 | 52066181 | 52066316 |
| chr16 | 52070581 | 52070696 |
| chr16 | 52187601 | 52187716 |
| chr16 | 55818241 | 55818406 |
| chr16 | 55818531 | 55818976 |
| chr16 | 55823311 | 55823426 |
| chr16 | 55850841 | 55851126 |
| chr16 | 55853391 | 55853516 |
| chr16 | 56007281 | 56007466 |
| chr16 | 57329451 | 57329666 |
| chr16 | 57485341 | 57485506 |
| chr16 | 57858071 | 57858306 |
| chr16 | 70329291 | 70329516 |
| chr16 | 72804601 | 72804856 |
| chr16 | 76342031 | 76342286 |
| chr16 | 76348401 | 76348586 |
| chr16 | 76352531 | 76352726 |
| chr16 | 76353121 | 76353266 |
| chr16 | 76358711 | 76359006 |
| chr16 | 76359151 | 76359286 |
| chr16 | 76367801 | 76368056 |
| chr16 | 76368111 | 76368266 |
| chr16 | 76369851 | 76370116 |
| chr16 | 76432691 | 76432846 |

|       |          |          |
|-------|----------|----------|
| chr16 | 76464481 | 76464636 |
| chr16 | 76511041 | 76511216 |
| chr16 | 77632641 | 77632886 |
| chr16 | 78328021 | 78328156 |
| chr16 | 78377461 | 78377606 |
| chr16 | 78396931 | 78397156 |
| chr16 | 78564021 | 78564246 |
| chr16 | 84646441 | 84646636 |
| chr16 | 84964391 | 84964576 |
| chr16 | 85074821 | 85074956 |
| chr16 | 85075131 | 85075376 |
| chr16 | 85116621 | 85116836 |
| chr16 | 85146141 | 85146396 |
| chr16 | 85756901 | 85757166 |
| chr16 | 85901911 | 85902176 |
| chr16 | 85926301 | 85926546 |
| chr16 | 86887661 | 86887796 |
| chr16 | 86888131 | 86888276 |
| chr16 | 87107461 | 87107616 |
| chr16 | 87612781 | 87612976 |
| chr16 | 87710341 | 87710546 |
| chr16 | 87713761 | 87713966 |
| chr16 | 89696601 | 89696716 |
| chr16 | 89895241 | 89895466 |
| chr16 | 89898111 | 89898226 |
| chr16 | 90028011 | 90028186 |
| chr16 | 90113511 | 90113786 |
| chr16 | 90213821 | 90214026 |
| chr16 | 90624351 | 90624466 |
| chr16 | 90677421 | 90677606 |
| chr16 | 90742981 | 90743246 |
| chr16 | 90745001 | 90745216 |
| chr16 | 90754051 | 90754186 |
| chr16 | 90760561 | 90760826 |
| chr16 | 90800051 | 90800166 |
| chr16 | 90821241 | 90821476 |
| chr16 | 90833641 | 90833896 |
| chr16 | 91085191 | 91085326 |
| chr16 | 91359211 | 91359506 |
| chr16 | 91378731 | 91379046 |
| chr16 | 91395111 | 91395266 |
| chr16 | 91538881 | 91539046 |
| chr16 | 91556531 | 91556776 |
| chr16 | 91556891 | 91557066 |
| chr16 | 91558281 | 91558546 |
| chr16 | 91660281 | 91660476 |
| chr16 | 91727561 | 91727926 |
| chr16 | 91829531 | 91829866 |
| chr16 | 91831171 | 91831336 |
| chr16 | 91846941 | 91847066 |
| chr16 | 91848741 | 91848996 |
| chr16 | 91865401 | 91865656 |
| chr16 | 91917861 | 91917976 |

|       |          |          |
|-------|----------|----------|
| chr16 | 92066731 | 92066916 |
| chr16 | 92084421 | 92084676 |
| chr16 | 92084711 | 92084826 |
| chr16 | 92112181 | 92112346 |
| chr16 | 92261861 | 92261946 |
| chr16 | 92402331 | 92402486 |
| chr16 | 92452031 | 92452176 |
| chr16 | 92538921 | 92539196 |
| chr16 | 92611881 | 92611996 |
| chr16 | 92622211 | 92622626 |
| chr16 | 93525661 | 93525876 |
| chr16 | 93730591 | 93730706 |
| chr16 | 93733301 | 93733416 |
| chr16 | 94113451 | 94113706 |
| chr16 | 94409471 | 94409756 |
| chr16 | 94531091 | 94531226 |
| chr16 | 94740691 | 94740876 |
| chr16 | 94740891 | 94741186 |
| chr16 | 94745511 | 94745766 |
| chr16 | 94758581 | 94758816 |
| chr16 | 94787841 | 94788096 |
| chr16 | 95864571 | 95864846 |
| chr16 | 95926021 | 95926226 |
| chr16 | 95930221 | 95930396 |
| chr16 | 95936361 | 95936536 |
| chr16 | 96212111 | 96212296 |
| chr16 | 96304901 | 96305276 |
| chr16 | 97985661 | 97985906 |
| chr15 | 3195261  | 3195486  |
| chr15 | 3447931  | 3448206  |
| chr15 | 3976241  | 3976366  |
| chr15 | 5098701  | 5098886  |
| chr15 | 5758441  | 5758846  |
| chr15 | 6411561  | 6411726  |
| chr15 | 6811771  | 6811986  |
| chr15 | 6939141  | 6939276  |
| chr15 | 7513681  | 7513846  |
| chr15 | 7513871  | 7514056  |
| chr15 | 7958361  | 7958506  |
| chr15 | 8346541  | 8346776  |
| chr15 | 8615761  | 8615996  |
| chr15 | 8632271  | 8632576  |
| chr15 | 8660201  | 8660436  |
| chr15 | 8662141  | 8662316  |
| chr15 | 8666401  | 8666516  |
| chr15 | 8731491  | 8731606  |
| chr15 | 8739101  | 8739216  |
| chr15 | 8956051  | 8956186  |
| chr15 | 9063071  | 9063186  |
| chr15 | 9315811  | 9315946  |
| chr15 | 10107961 | 10108126 |
| chr15 | 10508371 | 10508486 |
| chr15 | 10571951 | 10572066 |

|       |          |          |
|-------|----------|----------|
| chr15 | 10574921 | 10575286 |
| chr15 | 10619021 | 10619216 |
| chr15 | 10799041 | 10799206 |
| chr15 | 10806261 | 10806426 |
| chr15 | 11034901 | 11035086 |
| chr15 | 11104441 | 11104836 |
| chr15 | 11708561 | 11708696 |
| chr15 | 11812741 | 11813096 |
| chr15 | 11905801 | 11905956 |
| chr15 | 12030901 | 12031026 |
| chr15 | 12196391 | 12196566 |
| chr15 | 12307581 | 12307856 |
| chr15 | 12345261 | 12345546 |
| chr15 | 12447861 | 12448116 |
| chr15 | 12479801 | 12480026 |
| chr15 | 12480181 | 12480486 |
| chr15 | 12480551 | 12480776 |
| chr15 | 12525141 | 12525296 |
| chr15 | 12842491 | 12842746 |
| chr15 | 12846381 | 12846586 |
| chr15 | 25212341 | 25212686 |
| chr15 | 25563911 | 25564026 |
| chr15 | 25576021 | 25576306 |
| chr15 | 25599991 | 25600156 |
| chr15 | 25621971 | 25622186 |
| chr15 | 25704051 | 25704186 |
| chr15 | 25715831 | 25716066 |
| chr15 | 25718851 | 25718976 |
| chr15 | 25723731 | 25723936 |
| chr15 | 25859751 | 25859996 |
| chr15 | 25870161 | 25870276 |
| chr15 | 25877881 | 25878296 |
| chr15 | 25878331 | 25878636 |
| chr15 | 27013141 | 27013266 |
| chr15 | 27339691 | 27339926 |
| chr15 | 27415711 | 27415926 |
| chr15 | 27459201 | 27459526 |
| chr15 | 27468751 | 27468946 |
| chr15 | 27469131 | 27469286 |
| chr15 | 27490241 | 27490466 |
| chr15 | 27640131 | 27640366 |
| chr15 | 27646661 | 27646746 |
| chr15 | 27938941 | 27939136 |
| chr15 | 31184821 | 31184946 |
| chr15 | 31398571 | 31398866 |
| chr15 | 31518301 | 31518466 |
| chr15 | 32128441 | 32128596 |
| chr15 | 34222251 | 34222606 |
| chr15 | 34304831 | 34305006 |
| chr15 | 34465071 | 34465306 |
| chr15 | 35066231 | 35066346 |
| chr15 | 36422311 | 36422456 |
| chr15 | 36564641 | 36564796 |

|       |          |          |
|-------|----------|----------|
| chr15 | 36564991 | 36565336 |
| chr15 | 37381451 | 37381666 |
| chr15 | 37988271 | 37988396 |
| chr15 | 38005261 | 38005486 |
| chr15 | 38035371 | 38035596 |
| chr15 | 38218031 | 38218506 |
| chr15 | 38320261 | 38320536 |
| chr15 | 38407671 | 38407806 |
| chr15 | 38978231 | 38978586 |
| chr15 | 43721921 | 43722056 |
| chr15 | 44508291 | 44508526 |
| chr15 | 50498201 | 50498496 |
| chr15 | 50541021 | 50541236 |
| chr15 | 50803951 | 50804206 |
| chr15 | 50829001 | 50829306 |
| chr15 | 50942911 | 50943116 |
| chr15 | 51510841 | 51511096 |
| chr15 | 51642331 | 51642476 |
| chr15 | 51670061 | 51670206 |
| chr15 | 51784061 | 51784316 |
| chr15 | 52652521 | 52652626 |
| chr15 | 52907381 | 52907576 |
| chr15 | 53047491 | 53047626 |
| chr15 | 53076411 | 53076556 |
| chr15 | 53170911 | 53171366 |
| chr15 | 53503401 | 53503556 |
| chr15 | 53732891 | 53733026 |
| chr15 | 54642591 | 54642706 |
| chr15 | 54667351 | 54667476 |
| chr15 | 54823451 | 54823616 |
| chr15 | 54951981 | 54952146 |
| chr15 | 54964521 | 54964776 |
| chr15 | 56117141 | 56117276 |
| chr15 | 56564351 | 56564576 |
| chr15 | 57058931 | 57059116 |
| chr15 | 57537871 | 57538076 |
| chr15 | 57542281 | 57542536 |
| chr15 | 57576891 | 57577186 |
| chr15 | 57695131 | 57695356 |
| chr15 | 57721291 | 57721626 |
| chr15 | 57810491 | 57810776 |
| chr15 | 57816241 | 57816466 |
| chr15 | 57816611 | 57816866 |
| chr15 | 57817381 | 57817636 |
| chr15 | 57841011 | 57841346 |
| chr15 | 57867091 | 57867266 |
| chr15 | 58224661 | 58224806 |
| chr15 | 58820411 | 58820706 |
| chr15 | 58826431 | 58826576 |
| chr15 | 58830781 | 58830996 |
| chr15 | 58831111 | 58831516 |
| chr15 | 58838671 | 58838916 |
| chr15 | 58850501 | 58850646 |

|       |          |          |
|-------|----------|----------|
| chr15 | 59015831 | 59016066 |
| chr15 | 59033111 | 59033226 |
| chr15 | 59149231 | 59149476 |
| chr15 | 59332591 | 59332746 |
| chr15 | 59446791 | 59447056 |
| chr15 | 59465481 | 59465876 |
| chr15 | 59490121 | 59490376 |
| chr15 | 59496951 | 59497196 |
| chr15 | 59616151 | 59616456 |
| chr15 | 59657711 | 59657926 |
| chr15 | 59676521 | 59676776 |
| chr15 | 61968911 | 61969206 |
| chr15 | 61997881 | 61998116 |
| chr15 | 62047651 | 62047856 |
| chr15 | 62643341 | 62643476 |
| chr15 | 63762101 | 63762306 |
| chr15 | 63778961 | 63779206 |
| chr15 | 63831581 | 63832256 |
| chr15 | 63835231 | 63835456 |
| chr15 | 64193981 | 64194146 |
| chr15 | 65814551 | 65814676 |
| chr15 | 66571481 | 66571666 |
| chr15 | 66816151 | 66816276 |
| chr15 | 66837561 | 66837806 |
| chr15 | 66918671 | 66918836 |
| chr15 | 66934791 | 66934956 |
| chr15 | 66935091 | 66935306 |
| chr15 | 66964721 | 66965026 |
| chr15 | 66977581 | 66977706 |
| chr15 | 67732531 | 67732726 |
| chr15 | 68118621 | 68118796 |
| chr15 | 72721021 | 72721206 |
| chr15 | 72840981 | 72841136 |
| chr15 | 72884061 | 72884176 |
| chr15 | 72967541 | 72967776 |
| chr15 | 72979521 | 72979776 |
| chr15 | 73007381 | 73007726 |
| chr15 | 73007791 | 73007906 |
| chr15 | 73009691 | 73009976 |
| chr15 | 73010301 | 73010516 |
| chr15 | 73183191 | 73183366 |
| chr15 | 73451261 | 73451606 |
| chr15 | 73474221 | 73474466 |
| chr15 | 74731321 | 74731486 |
| chr15 | 74753061 | 74753256 |
| chr15 | 74798241 | 74798356 |
| chr15 | 74917381 | 74917586 |
| chr15 | 75588531 | 75588646 |
| chr15 | 75871191 | 75871446 |
| chr15 | 76136691 | 76136816 |
| chr15 | 76175351 | 76175486 |
| chr15 | 76294151 | 76294666 |
| chr15 | 76296361 | 76296476 |

|       |          |          |
|-------|----------|----------|
| chr15 | 76310131 | 76310426 |
| chr15 | 76332681 | 76332796 |
| chr15 | 76520921 | 76521106 |
| chr15 | 76527571 | 76527796 |
| chr15 | 76528281 | 76528626 |
| chr15 | 76530401 | 76530636 |
| chr15 | 76534831 | 76535086 |
| chr15 | 76555071 | 76555266 |
| chr15 | 76598221 | 76598436 |
| chr15 | 76875981 | 76876206 |
| chr15 | 76908451 | 76908636 |
| chr15 | 76909791 | 76910236 |
| chr15 | 76911351 | 76911676 |
| chr15 | 77594711 | 77594856 |
| chr15 | 77605691 | 77605816 |
| chr15 | 77646411 | 77646596 |
| chr15 | 77650871 | 77651006 |
| chr15 | 77779431 | 77779666 |
| chr15 | 78240121 | 78240496 |
| chr15 | 78267471 | 78267636 |
| chr15 | 78268211 | 78268416 |
| chr15 | 78300541 | 78300676 |
| chr15 | 78598261 | 78598516 |
| chr15 | 78617211 | 78617466 |
| chr15 | 78617811 | 78617946 |
| chr15 | 78747741 | 78748316 |
| chr15 | 78803431 | 78803596 |
| chr15 | 78908671 | 78908816 |
| chr15 | 78953101 | 78953386 |
| chr15 | 78961281 | 78961456 |
| chr15 | 79024441 | 79024556 |
| chr15 | 79153241 | 79153366 |
| chr15 | 79176891 | 79177086 |
| chr15 | 79360441 | 79360786 |
| chr15 | 79377581 | 79377856 |
| chr15 | 79377951 | 79378036 |
| chr15 | 79378261 | 79378346 |
| chr15 | 79564671 | 79564846 |
| chr15 | 79836991 | 79837136 |
| chr15 | 79984241 | 79984496 |
| chr15 | 80003601 | 80003856 |
| chr15 | 80536671 | 80537376 |
| chr15 | 80682061 | 80682276 |
| chr15 | 80706811 | 80707066 |
| chr15 | 81169461 | 81169676 |
| chr15 | 81189361 | 81189516 |
| chr15 | 81253211 | 81253346 |
| chr15 | 81651161 | 81651296 |
| chr15 | 81669071 | 81669396 |
| chr15 | 81669401 | 81669546 |
| chr15 | 81717101 | 81717306 |
| chr15 | 81754791 | 81755056 |
| chr15 | 81758771 | 81759046 |



|       |          |          |
|-------|----------|----------|
| chr15 | 81983001 | 81983116 |
| chr15 | 81997661 | 81997996 |
| chr15 | 82013891 | 82014146 |
| chr15 | 82062701 | 82062936 |
| chr15 | 82183241 | 82183446 |
| chr15 | 82703001 | 82703116 |
| chr15 | 82751361 | 82751506 |
| chr15 | 82768621 | 82768736 |
| chr15 | 82780781 | 82781016 |
| chr15 | 83084641 | 83084886 |
| chr15 | 83174451 | 83174716 |
| chr15 | 83175551 | 83175666 |
| chr15 | 83263181 | 83263356 |
| chr15 | 83274911 | 83275096 |
| chr15 | 83282891 | 83283016 |
| chr15 | 83962451 | 83962616 |
| chr15 | 84029961 | 84030216 |
| chr15 | 84030471 | 84030876 |
| chr15 | 84129371 | 84129486 |
| chr15 | 84156261 | 84156516 |
| chr15 | 84465081 | 84465226 |
| chr15 | 84469741 | 84469926 |
| chr15 | 84527841 | 84528156 |
| chr15 | 84770551 | 84770726 |
| chr15 | 84813401 | 84813776 |
| chr15 | 85441281 | 85441536 |
| chr15 | 85444461 | 85444626 |
| chr15 | 85475841 | 85476086 |
| chr15 | 85483841 | 85484336 |
| chr15 | 85486181 | 85486396 |
| chr15 | 85497861 | 85497986 |
| chr15 | 85504091 | 85504216 |
| chr15 | 85505101 | 85505386 |
| chr15 | 85506091 | 85506476 |
| chr15 | 85508601 | 85508836 |
| chr15 | 85509401 | 85509946 |
| chr15 | 85510151 | 85510396 |
| chr15 | 85517101 | 85517396 |
| chr15 | 85519491 | 85519716 |
| chr15 | 85532691 | 85533306 |
| chr15 | 85533771 | 85534096 |
| chr15 | 85535631 | 85535886 |
| chr15 | 85536691 | 85536816 |
| chr15 | 85536851 | 85537086 |
| chr15 | 85537531 | 85537786 |
| chr15 | 85538201 | 85538336 |
| chr15 | 85913271 | 85913546 |
| chr15 | 85916641 | 85916816 |
| chr15 | 85948091 | 85948346 |
| chr15 | 85970231 | 85970366 |
| chr15 | 86013251 | 86013416 |
| chr15 | 88547851 | 88548096 |
| chr15 | 88553681 | 88553936 |

|       |          |          |
|-------|----------|----------|
| chr15 | 88667551 | 88667806 |
| chr15 | 88670691 | 88670846 |
| chr15 | 88682161 | 88682386 |
| chr15 | 88683571 | 88683996 |
| chr15 | 88684251 | 88684376 |
| chr15 | 88689491 | 88689686 |
| chr15 | 88689751 | 88689976 |
| chr15 | 88695341 | 88695616 |
| chr15 | 88697251 | 88697596 |
| chr15 | 88713281 | 88713506 |
| chr15 | 88732881 | 88733016 |
| chr15 | 88749751 | 88749976 |
| chr15 | 89257301 | 89257526 |
| chr15 | 89262061 | 89262176 |
| chr15 | 90879341 | 90879546 |
| chr15 | 90998521 | 90998726 |
| chr15 | 92542311 | 92542426 |
| chr15 | 93090431 | 93090686 |
| chr15 | 93348291 | 93348546 |
| chr15 | 93348571 | 93348686 |
| chr15 | 93349501 | 93349656 |
| chr15 | 93368911 | 93369026 |
| chr15 | 93369041 | 93369166 |
| chr15 | 93403441 | 93403606 |
| chr15 | 93403721 | 93403886 |
| chr15 | 93409661 | 93409786 |
| chr15 | 93414141 | 93414256 |
| chr15 | 93418921 | 93419136 |
| chr15 | 93422381 | 93422596 |
| chr15 | 93460901 | 93461056 |
| chr15 | 93516771 | 93516906 |
| chr15 | 93536951 | 93537326 |
| chr15 | 93537911 | 93538096 |
| chr15 | 93542211 | 93542366 |
| chr15 | 93542801 | 93542986 |
| chr15 | 93543751 | 93543956 |
| chr15 | 93565271 | 93565416 |
| chr15 | 93571351 | 93571456 |
| chr15 | 93588351 | 93588526 |
| chr15 | 93663071 | 93663286 |
| chr15 | 93856521 | 93856646 |
| chr15 | 93967661 | 93967896 |
| chr15 | 94413041 | 94413256 |
| chr15 | 95650511 | 95650796 |
| chr15 | 95667671 | 95667796 |
| chr15 | 95679041 | 95679146 |
| chr15 | 95733101 | 95733246 |
| chr15 | 95734551 | 95734756 |
| chr15 | 95782271 | 95782526 |
| chr15 | 95789841 | 95789926 |
| chr15 | 96318521 | 96318696 |
| chr15 | 96378541 | 96378696 |
| chr15 | 96524301 | 96524466 |

|       |          |          |
|-------|----------|----------|
| chr15 | 96539471 | 96539686 |
| chr15 | 96560911 | 96561166 |
| chr15 | 96574091 | 96574416 |
| chr15 | 96574421 | 96574666 |
| chr15 | 96577481 | 96577646 |
| chr15 | 96999911 | 97000096 |
| chr15 | 97090371 | 97090576 |
| chr15 | 97090991 | 97091206 |
| chr15 | 97096961 | 97097186 |
| chr15 | 97122041 | 97122426 |
| chr15 | 97174441 | 97174626 |
| chr15 | 97403101 | 97403336 |
| chr15 | 97501141 | 97501356 |
| chr15 | 97502991 | 97503136 |
| chr15 | 97558891 | 97559416 |
| chr15 | 97597551 | 97597716 |
| chr15 | 97619311 | 97619456 |
| chr15 | 97621711 | 97621836 |
| chr15 | 97708811 | 97708956 |
| chr15 | 97708991 | 97709216 |
| chr15 | 97711191 | 97711456 |
| chr15 | 97769291 | 97769576 |
| chr15 | 97896611 | 97896846 |
| chr15 | 98619691 | 98619946 |
| chr15 | 98681221 | 98681476 |
| chr15 | 98818651 | 98818876 |
| chr15 | 98843031 | 98843186 |
| chr15 | 98847891 | 98848286 |
| chr15 | 98871121 | 98871276 |
| chr15 | 98948401 | 98948736 |
| chr15 | 99089941 | 99090086 |
| chr15 | 99225781 | 99226036 |
| chr15 | 99226181 | 99226356 |
| chr15 | 99226371 | 99226656 |
| chr15 | 99230231 | 99230486 |
| chr15 | 99230551 | 99231306 |
| chr15 | 99233371 | 99233526 |
| chr15 | 99235661 | 99235856 |
| chr15 | 99238061 | 99238226 |
| chr15 | 99239591 | 99239846 |
| chr15 | 99239971 | 99240226 |
| chr15 | 99264091 | 99264206 |
| chr15 | 99266131 | 99266336 |
| chr15 | 99280081 | 99280196 |
| chr15 | 99328871 | 99329046 |
| chr15 | 99377281 | 99377446 |
| chr15 | 99409521 | 99409866 |
| chr15 | 99413801 | 99414476 |
| chr15 | 99415191 | 99415696 |
| chr15 | 99444751 | 99444926 |
| chr15 | 99534571 | 99534726 |
| chr15 | 99546031 | 99546336 |
| chr15 | 99546511 | 99546776 |

|       |           |           |
|-------|-----------|-----------|
| chr15 | 99547971  | 99548426  |
| chr15 | 99548531  | 99549006  |
| chr15 | 99550341  | 99550736  |
| chr15 | 99552561  | 99552806  |
| chr15 | 99553501  | 99553796  |
| chr15 | 99553811  | 99554076  |
| chr15 | 99645051  | 99645276  |
| chr15 | 99692571  | 99692796  |
| chr15 | 99695541  | 99695726  |
| chr15 | 99695961  | 99696236  |
| chr15 | 99889421  | 99889586  |
| chr15 | 99889711  | 99889876  |
| chr15 | 99897251  | 99897496  |
| chr15 | 99904031  | 99904216  |
| chr15 | 99930921  | 99931176  |
| chr15 | 99975771  | 99975926  |
| chr15 | 100131981 | 100132246 |
| chr15 | 100243821 | 100243986 |
| chr15 | 100249881 | 100250036 |
| chr15 | 100298301 | 100298466 |
| chr15 | 100299671 | 100299826 |
| chr15 | 100319641 | 100320136 |
| chr15 | 100332851 | 100333046 |
| chr15 | 100416511 | 100416676 |
| chr15 | 100416981 | 100417236 |
| chr15 | 100458671 | 100458826 |
| chr15 | 100471551 | 100471806 |
| chr15 | 100691301 | 100691416 |
| chr15 | 100895611 | 100895936 |
| chr15 | 100909801 | 100910006 |
| chr15 | 100911811 | 100912056 |
| chr15 | 100916991 | 100917416 |
| chr15 | 100936551 | 100936746 |
| chr15 | 100943681 | 100944096 |
| chr15 | 100973961 | 100974166 |
| chr15 | 100993391 | 100993726 |
| chr15 | 100993891 | 100994036 |
| chr15 | 101006461 | 101006616 |
| chr15 | 101013611 | 101013826 |
| chr15 | 101051441 | 101051586 |
| chr15 | 101059351 | 101059666 |
| chr15 | 101065591 | 101065746 |
| chr15 | 101091591 | 101091896 |
| chr15 | 101092021 | 101092236 |
| chr15 | 101117381 | 101117636 |
| chr15 | 101125001 | 101125136 |
| chr15 | 101804851 | 101805086 |
| chr15 | 101805991 | 101806496 |
| chr15 | 101882701 | 101882876 |
| chr15 | 101925561 | 101925826 |
| chr15 | 101934181 | 101934436 |
| chr15 | 101944541 | 101944666 |
| chr15 | 101947201 | 101947516 |

|       |           |           |
|-------|-----------|-----------|
| chr15 | 102016571 | 102017216 |
| chr15 | 102024291 | 102024426 |
| chr15 | 102036251 | 102036556 |
| chr15 | 102110771 | 102111026 |
| chr15 | 102200461 | 102200606 |
| chr15 | 102200771 | 102201126 |
| chr15 | 102226031 | 102226196 |
| chr15 | 102229791 | 102229906 |
| chr15 | 102229931 | 102230046 |
| chr15 | 102424891 | 102425046 |
| chr15 | 102978281 | 102978466 |
| chr15 | 103078851 | 103079256 |
| chr15 | 103079261 | 103079646 |
| chr15 | 103088841 | 103089096 |
| chr15 | 103120761 | 103120916 |
| chr15 | 103132371 | 103132586 |
| chr14 | 8657181   | 8657436   |
| chr14 | 8733011   | 8733176   |
| chr14 | 8733271   | 8733686   |
| chr14 | 8887451   | 8887596   |
| chr14 | 8926381   | 8926496   |
| chr14 | 9048531   | 9048786   |
| chr14 | 9052551   | 9052786   |
| chr14 | 9163991   | 9164246   |
| chr14 | 9982851   | 9982966   |
| chr14 | 14897451  | 14897566  |
| chr14 | 14904131  | 14904356  |
| chr14 | 18469641  | 18469766  |
| chr14 | 18885011  | 18885136  |
| chr14 | 19522451  | 19522656  |
| chr14 | 20620811  | 20621026  |
| chr14 | 20796491  | 20796586  |
| chr14 | 20796831  | 20797086  |
| chr14 | 21004841  | 21004996  |
| chr14 | 21067271  | 21067546  |
| chr14 | 21611091  | 21611236  |
| chr14 | 21789671  | 21789926  |
| chr14 | 21937581  | 21937696  |
| chr14 | 21987651  | 21987896  |
| chr14 | 22221761  | 22221916  |
| chr14 | 22369841  | 22369986  |
| chr14 | 22499161  | 22499296  |
| chr14 | 22666851  | 22666986  |
| chr14 | 22801421  | 22801536  |
| chr14 | 22908351  | 22908646  |
| chr14 | 23428561  | 23428676  |
| chr14 | 23628461  | 23628626  |
| chr14 | 23666371  | 23666546  |
| chr14 | 24112041  | 24112176  |
| chr14 | 24336091  | 24336226  |
| chr14 | 25612111  | 25612236  |
| chr14 | 25681631  | 25681786  |
| chr14 | 25779641  | 25779876  |

|       |          |          |
|-------|----------|----------|
| chr14 | 25780651 | 25780766 |
| chr14 | 26300781 | 26300976 |
| chr14 | 26301361 | 26301506 |
| chr14 | 26313571 | 26313706 |
| chr14 | 26317091 | 26317376 |
| chr14 | 26328281 | 26328586 |
| chr14 | 26344171 | 26344286 |
| chr14 | 26361371 | 26361486 |
| chr14 | 26419251 | 26419486 |
| chr14 | 26419691 | 26419926 |
| chr14 | 26424161 | 26424526 |
| chr14 | 26446771 | 26446926 |
| chr14 | 26566411 | 26566596 |
| chr14 | 26567971 | 26568346 |
| chr14 | 26588791 | 26588886 |
| chr14 | 26588901 | 26589156 |
| chr14 | 26616191 | 26616556 |
| chr14 | 26616991 | 26617126 |
| chr14 | 27274401 | 27274586 |
| chr14 | 27341341 | 27341476 |
| chr14 | 27927661 | 27927796 |
| chr14 | 27988081 | 27988346 |
| chr14 | 27991771 | 27991886 |
| chr14 | 28168381 | 28168506 |
| chr14 | 28180651 | 28180826 |
| chr14 | 28493901 | 28494056 |
| chr14 | 28838791 | 28839026 |
| chr14 | 29188721 | 29188896 |
| chr14 | 29226911 | 29227056 |
| chr14 | 29853841 | 29854066 |
| chr14 | 29999081 | 29999246 |
| chr14 | 31357091 | 31357276 |
| chr14 | 31371101 | 31371346 |
| chr14 | 31407681 | 31408016 |
| chr14 | 31425741 | 31425936 |
| chr14 | 31632921 | 31633076 |
| chr14 | 31674901 | 31675026 |
| chr14 | 31687561 | 31687816 |
| chr14 | 31944811 | 31944976 |
| chr14 | 31946651 | 31946916 |
| chr14 | 31947121 | 31947376 |
| chr14 | 32041171 | 32041466 |
| chr14 | 32195651 | 32195836 |
| chr14 | 32225651 | 32225766 |
| chr14 | 32226051 | 32226216 |
| chr14 | 32299341 | 32299526 |
| chr14 | 32399191 | 32399456 |
| chr14 | 32461241 | 32461406 |
| chr14 | 32887201 | 32887386 |
| chr14 | 32965401 | 32965656 |
| chr14 | 32974271 | 32974466 |
| chr14 | 33346021 | 33346296 |
| chr14 | 34167051 | 34167526 |

|       |          |          |
|-------|----------|----------|
| chr14 | 34183881 | 34184126 |
| chr14 | 34899721 | 34899906 |
| chr14 | 35112371 | 35112726 |
| chr14 | 35257681 | 35257916 |
| chr14 | 35278831 | 35278966 |
| chr14 | 35361581 | 35361756 |
| chr14 | 35364801 | 35365156 |
| chr14 | 41769251 | 41769526 |
| chr14 | 41772351 | 41772496 |
| chr14 | 41773021 | 41773396 |
| chr14 | 41773481 | 41773636 |
| chr14 | 45929661 | 45929776 |
| chr14 | 45935221 | 45935426 |
| chr14 | 46063111 | 46063256 |
| chr14 | 46075671 | 46075996 |
| chr14 | 46097371 | 46097586 |
| chr14 | 46159551 | 46159776 |
| chr14 | 46185181 | 46185326 |
| chr14 | 47213601 | 47213696 |
| chr14 | 47986731 | 47986856 |
| chr14 | 48294331 | 48294546 |
| chr14 | 48396881 | 48397056 |
| chr14 | 48704591 | 48704826 |
| chr14 | 48733651 | 48733936 |
| chr14 | 48741941 | 48742156 |
| chr14 | 48743791 | 48744026 |
| chr14 | 48744681 | 48744896 |
| chr14 | 48749501 | 48750006 |
| chr14 | 48750381 | 48750746 |
| chr14 | 48750981 | 48751366 |
| chr14 | 48816791 | 48817066 |
| chr14 | 48829021 | 48829256 |
| chr14 | 48937531 | 48937696 |
| chr14 | 48965641 | 48965936 |
| chr14 | 51512371 | 51512696 |
| chr14 | 51513021 | 51513166 |
| chr14 | 51589181 | 51589596 |
| chr14 | 54982221 | 54982476 |
| chr14 | 55360621 | 55360836 |
| chr14 | 55506011 | 55506266 |
| chr14 | 55511461 | 55511686 |
| chr14 | 55635901 | 55636056 |
| chr14 | 55636211 | 55636376 |
| chr14 | 55697781 | 55698036 |
| chr14 | 56114751 | 56114906 |
| chr14 | 56271601 | 56271746 |
| chr14 | 56453831 | 56453996 |
| chr14 | 56482511 | 56482756 |
| chr14 | 57390651 | 57390836 |
| chr14 | 58144601 | 58144866 |
| chr14 | 58506091 | 58506336 |
| chr14 | 60211591 | 60211716 |
| chr14 | 62034151 | 62034496 |

|       |          |          |
|-------|----------|----------|
| chr14 | 62272721 | 62272976 |
| chr14 | 63459461 | 63459706 |
| chr14 | 63769591 | 63769766 |
| chr14 | 63783491 | 63783776 |
| chr14 | 64226841 | 64227136 |
| chr14 | 64583791 | 64583986 |
| chr14 | 64671431 | 64671586 |
| chr14 | 65449901 | 65450096 |
| chr14 | 65690211 | 65690456 |
| chr14 | 65704781 | 65705066 |
| chr14 | 65705151 | 65705406 |
| chr14 | 65708111 | 65708276 |
| chr14 | 65715531 | 65715786 |
| chr14 | 65768391 | 65768506 |
| chr14 | 65979311 | 65979456 |
| chr14 | 65989261 | 65989536 |
| chr14 | 65994541 | 65994776 |
| chr14 | 66007511 | 66007626 |
| chr14 | 66310471 | 66310616 |
| chr14 | 66341341 | 66341666 |
| chr14 | 66561601 | 66561766 |
| chr14 | 66884101 | 66884506 |
| chr14 | 66884621 | 66884986 |
| chr14 | 67442711 | 67442836 |
| chr14 | 67453951 | 67454086 |
| chr14 | 67901631 | 67901836 |
| chr14 | 68244441 | 68244576 |
| chr14 | 69964161 | 69964306 |
| chr14 | 69964381 | 69964536 |
| chr14 | 69964691 | 69965106 |
| chr14 | 70035681 | 70035856 |
| chr14 | 70088461 | 70088686 |
| chr14 | 70253851 | 70254016 |
| chr14 | 70461511 | 70461686 |
| chr14 | 70466051 | 70466296 |
| chr14 | 70579131 | 70579326 |
| chr14 | 70723311 | 70723436 |
| chr14 | 70966171 | 70966316 |
| chr14 | 71434351 | 71434476 |
| chr14 | 71436481 | 71436696 |
| chr14 | 73531711 | 73531956 |
| chr14 | 73811081 | 73811306 |
| chr14 | 73852781 | 73853036 |
| chr14 | 75313341 | 75313486 |
| chr14 | 76306831 | 76307036 |
| chr14 | 76820631 | 76820896 |
| chr14 | 76825831 | 76826116 |
| chr14 | 76826131 | 76826466 |
| chr14 | 76936971 | 76937126 |
| chr14 | 77018221 | 77018436 |
| chr14 | 77078371 | 77078626 |
| chr14 | 77114311 | 77114436 |
| chr14 | 77198901 | 77199126 |



|       |           |           |
|-------|-----------|-----------|
| chr14 | 77199661  | 77199816  |
| chr14 | 77204911  | 77205306  |
| chr14 | 77212071  | 77212436  |
| chr14 | 77252181  | 77252366  |
| chr14 | 77768331  | 77768456  |
| chr14 | 77904651  | 77904806  |
| chr14 | 77980261  | 77980406  |
| chr14 | 78018451  | 78018626  |
| chr14 | 78250461  | 78250616  |
| chr14 | 79101401  | 79101516  |
| chr14 | 79124201  | 79124406  |
| chr14 | 79133341  | 79133556  |
| chr14 | 79623651  | 79623826  |
| chr14 | 79659181  | 79659346  |
| chr14 | 79689771  | 79690316  |
| chr14 | 79693391  | 79693566  |
| chr14 | 79699211  | 79699446  |
| chr14 | 79701521  | 79701656  |
| chr14 | 79888461  | 79888696  |
| chr14 | 82716811  | 82716956  |
| chr14 | 93557831  | 93557946  |
| chr14 | 99678521  | 99678716  |
| chr14 | 99709591  | 99709826  |
| chr14 | 99977771  | 99978056  |
| chr14 | 100157651 | 100157906 |
| chr14 | 100682791 | 100682936 |
| chr14 | 100691311 | 100691506 |
| chr14 | 101863461 | 101863656 |
| chr14 | 101962451 | 101962586 |
| chr14 | 101965331 | 101965526 |
| chr14 | 101990441 | 101990686 |
| chr14 | 101996651 | 101996906 |
| chr14 | 102006721 | 102006866 |
| chr14 | 105901231 | 105901376 |
| chr14 | 106269851 | 106269956 |
| chr14 | 118332681 | 118332806 |
| chr14 | 119056671 | 119056826 |
| chr14 | 119062051 | 119062446 |
| chr14 | 119114321 | 119114546 |
| chr14 | 120482171 | 120482326 |
| chr14 | 120501481 | 120501616 |
| chr14 | 120688271 | 120688596 |
| chr14 | 120710951 | 120711106 |
| chr14 | 120730011 | 120730176 |
| chr14 | 120779211 | 120779416 |
| chr14 | 121669341 | 121669456 |
| chr14 | 121669541 | 121669996 |
| chr14 | 121698501 | 121698616 |
| chr14 | 121738551 | 121738746 |
| chr14 | 121739091 | 121739416 |
| chr14 | 121751861 | 121752226 |
| chr14 | 121761111 | 121761346 |
| chr14 | 121766661 | 121766916 |

|       |           |           |
|-------|-----------|-----------|
| chr14 | 121767011 | 121767216 |
| chr14 | 122053761 | 122053886 |
| chr14 | 122059771 | 122059966 |
| chr14 | 122113291 | 122113536 |
| chr14 | 122392281 | 122392496 |
| chr14 | 122850281 | 122850436 |
| chr14 | 123036821 | 123036956 |
| chr19 | 3340161   | 3340406   |
| chr19 | 3564201   | 3564476   |
| chr19 | 3648701   | 3648826   |
| chr19 | 3667601   | 3667876   |
| chr19 | 3667921   | 3668216   |
| chr19 | 3674551   | 3674686   |
| chr19 | 3675001   | 3675136   |
| chr19 | 3695381   | 3695536   |
| chr19 | 3958901   | 3959156   |
| chr19 | 4001941   | 4002216   |
| chr19 | 4002251   | 4002486   |
| chr19 | 4127631   | 4127786   |
| chr19 | 4138281   | 4138536   |
| chr19 | 4138621   | 4138816   |
| chr19 | 4194961   | 4195186   |
| chr19 | 4220821   | 4221016   |
| chr19 | 4235101   | 4235226   |
| chr19 | 4239891   | 4240006   |
| chr19 | 4420621   | 4420836   |
| chr19 | 4429631   | 4429856   |
| chr19 | 4451571   | 4451826   |
| chr19 | 4452081   | 4452246   |
| chr19 | 4540311   | 4540646   |
| chr19 | 4557971   | 4558316   |
| chr19 | 4570861   | 4571076   |
| chr19 | 4603811   | 4603946   |
| chr19 | 4604331   | 4604586   |
| chr19 | 4613181   | 4613366   |
| chr19 | 4613541   | 4613756   |
| chr19 | 4613841   | 4614056   |
| chr19 | 4828981   | 4829216   |
| chr19 | 4942621   | 4942896   |
| chr19 | 5061681   | 5062216   |
| chr19 | 5384791   | 5384946   |
| chr19 | 5426561   | 5426676   |
| chr19 | 5530261   | 5530446   |
| chr19 | 5537781   | 5537966   |
| chr19 | 5655311   | 5655496   |
| chr19 | 5686441   | 5686596   |
| chr19 | 5739761   | 5740046   |
| chr19 | 5745261   | 5745656   |
| chr19 | 5824381   | 5824506   |
| chr19 | 5824601   | 5824856   |
| chr19 | 5827061   | 5827346   |
| chr19 | 5827761   | 5827966   |
| chr19 | 5828741   | 5828846   |

|       |         |         |
|-------|---------|---------|
| chr19 | 5829161 | 5829296 |
| chr19 | 5831021 | 5831186 |
| chr19 | 5831281 | 5831526 |
| chr19 | 5832411 | 5832556 |
| chr19 | 5833891 | 5834126 |
| chr19 | 5834231 | 5834636 |
| chr19 | 5835381 | 5835586 |
| chr19 | 5836871 | 5837456 |
| chr19 | 5837561 | 5837756 |
| chr19 | 5838321 | 5838806 |
| chr19 | 5839221 | 5839346 |
| chr19 | 5840541 | 5841036 |
| chr19 | 5849511 | 5849776 |
| chr19 | 5849821 | 5850166 |
| chr19 | 5907161 | 5907296 |
| chr19 | 5908091 | 5908236 |
| chr19 | 5928721 | 5928956 |
| chr19 | 5935611 | 5935726 |
| chr19 | 5955441 | 5955696 |
| chr19 | 6287221 | 6287466 |
| chr19 | 6302731 | 6302916 |
| chr19 | 6340321 | 6340436 |
| chr19 | 6340641 | 6340806 |
| chr19 | 6354331 | 6354586 |
| chr19 | 6396101 | 6396296 |
| chr19 | 6545451 | 6545646 |
| chr19 | 6545891 | 6546186 |
| chr19 | 6994641 | 6994786 |
| chr19 | 7028831 | 7028976 |
| chr19 | 7060901 | 7061036 |
| chr19 | 7132821 | 7133026 |
| chr19 | 7222991 | 7223166 |
| chr19 | 7223731 | 7223856 |
| chr19 | 7234801 | 7234896 |
| chr19 | 7256861 | 7257246 |
| chr19 | 7301171 | 7301336 |
| chr19 | 7344341 | 7344496 |
| chr19 | 7348841 | 7349096 |
| chr19 | 7369471 | 7369866 |
| chr19 | 7391261 | 7391586 |
| chr19 | 7424901 | 7425136 |
| chr19 | 7427231 | 7427726 |
| chr19 | 7490631 | 7490826 |
| chr19 | 7496931 | 7497276 |
| chr19 | 7497511 | 7497686 |
| chr19 | 7498291 | 7498446 |
| chr19 | 7568051 | 7568226 |
| chr19 | 7681191 | 7681516 |
| chr19 | 7681581 | 7681716 |
| chr19 | 7691221 | 7691376 |
| chr19 | 8897321 | 8897506 |
| chr19 | 8914891 | 8915246 |
| chr19 | 8970401 | 8970596 |

|       |          |          |
|-------|----------|----------|
| chr19 | 8990211  | 8990386  |
| chr19 | 9074211  | 9074476  |
| chr19 | 9093261  | 9093396  |
| chr19 | 9121511  | 9121756  |
| chr19 | 9162961  | 9163106  |
| chr19 | 10039151 | 10039266 |
| chr19 | 10052481 | 10052746 |
| chr19 | 10059201 | 10059526 |
| chr19 | 10134881 | 10135156 |
| chr19 | 10135391 | 10135506 |
| chr19 | 10255971 | 10256206 |
| chr19 | 10341461 | 10341616 |
| chr19 | 10341721 | 10342216 |
| chr19 | 10364441 | 10364996 |
| chr19 | 10380071 | 10380476 |
| chr19 | 10633581 | 10633696 |
| chr19 | 10775861 | 10775996 |
| chr19 | 10875931 | 10876076 |
| chr19 | 10954341 | 10954486 |
| chr19 | 10983601 | 10983776 |
| chr19 | 11985561 | 11985696 |
| chr19 | 12519381 | 12519666 |
| chr19 | 12547261 | 12547426 |
| chr19 | 12561011 | 12561256 |
| chr19 | 12562181 | 12562336 |
| chr19 | 12573311 | 12573496 |
| chr19 | 15985491 | 15985796 |
| chr19 | 15989311 | 15989606 |
| chr19 | 15992821 | 15993076 |
| chr19 | 16000561 | 16000716 |
| chr19 | 16014051 | 16014256 |
| chr19 | 16016051 | 16016236 |
| chr19 | 16221961 | 16222096 |
| chr19 | 16241691 | 16241936 |
| chr19 | 16262691 | 16263026 |
| chr19 | 16297701 | 16298036 |
| chr19 | 16335341 | 16335476 |
| chr19 | 16362031 | 16362216 |
| chr19 | 16366901 | 16367076 |
| chr19 | 17226481 | 17226606 |
| chr19 | 17300541 | 17300816 |
| chr19 | 17411551 | 17411806 |
| chr19 | 21248711 | 21248836 |
| chr19 | 21698751 | 21698876 |
| chr19 | 21721601 | 21721716 |
| chr19 | 21848181 | 21848426 |
| chr19 | 23001231 | 23001526 |
| chr19 | 23119351 | 23119506 |
| chr19 | 23208341 | 23208596 |
| chr19 | 23208701 | 23208876 |
| chr19 | 23209251 | 23209546 |
| chr19 | 23210661 | 23210806 |
| chr19 | 23211001 | 23211396 |

|       |          |          |
|-------|----------|----------|
| chr19 | 23218141 | 23218476 |
| chr19 | 23218541 | 23218746 |
| chr19 | 23226691 | 23226876 |
| chr19 | 23263951 | 23264086 |
| chr19 | 23894491 | 23894616 |
| chr19 | 23973071 | 23973246 |
| chr19 | 25055821 | 25055966 |
| chr19 | 25485801 | 25486216 |
| chr19 | 25506271 | 25506446 |
| chr19 | 25506611 | 25506726 |
| chr19 | 26790921 | 26791166 |
| chr19 | 27141281 | 27141586 |
| chr19 | 27255011 | 27255176 |
| chr19 | 27292901 | 27293146 |
| chr19 | 27293251 | 27293596 |
| chr19 | 27387191 | 27387426 |
| chr19 | 27660151 | 27660406 |
| chr19 | 27951701 | 27951856 |
| chr19 | 28358711 | 28358956 |
| chr19 | 28373751 | 28373966 |
| chr19 | 28497551 | 28497756 |
| chr19 | 28564011 | 28564176 |
| chr19 | 28606111 | 28606436 |
| chr19 | 28682891 | 28683076 |
| chr19 | 29117021 | 29117296 |
| chr19 | 29117321 | 29117456 |
| chr19 | 29120561 | 29120916 |
| chr19 | 29173891 | 29174046 |
| chr19 | 29187071 | 29187536 |
| chr19 | 29188761 | 29188916 |
| chr19 | 29200941 | 29201376 |
| chr19 | 29231731 | 29231986 |
| chr19 | 29480581 | 29480696 |
| chr19 | 29537031 | 29537216 |
| chr19 | 29750891 | 29751066 |
| chr19 | 29873631 | 29873816 |
| chr19 | 30079031 | 30079226 |
| chr19 | 30181471 | 30181596 |
| chr19 | 32216791 | 32216966 |
| chr19 | 32255701 | 32255846 |
| chr19 | 32260961 | 32261256 |
| chr19 | 32265831 | 32266076 |
| chr19 | 32381011 | 32381166 |
| chr19 | 32440971 | 32441246 |
| chr19 | 32712141 | 32712276 |
| chr19 | 32837481 | 32837596 |
| chr19 | 32937371 | 32937496 |
| chr19 | 33137021 | 33137146 |
| chr19 | 33174601 | 33174796 |
| chr19 | 33184721 | 33185246 |
| chr19 | 33188241 | 33188436 |
| chr19 | 34510471 | 34510596 |
| chr19 | 34579801 | 34580026 |

|       |          |          |
|-------|----------|----------|
| chr19 | 34580071 | 34580246 |
| chr19 | 36424131 | 36424276 |
| chr19 | 36424811 | 36424936 |
| chr19 | 36450031 | 36450226 |
| chr19 | 36609581 | 36609796 |
| chr19 | 36648291 | 36648426 |
| chr19 | 36709411 | 36709556 |
| chr19 | 36745281 | 36745436 |
| chr19 | 36752041 | 36752246 |
| chr19 | 36761901 | 36762076 |
| chr19 | 36762291 | 36762406 |
| chr19 | 36768951 | 36769146 |
| chr19 | 36770671 | 36770786 |
| chr19 | 36771461 | 36771686 |
| chr19 | 36780451 | 36780706 |
| chr19 | 36805511 | 36805846 |
| chr19 | 36808301 | 36808386 |
| chr19 | 36808801 | 36809016 |
| chr19 | 37098011 | 37098276 |
| chr19 | 37100241 | 37100626 |
| chr19 | 37100691 | 37100926 |
| chr19 | 37100971 | 37101226 |
| chr19 | 37172361 | 37172606 |
| chr19 | 37329931 | 37330196 |
| chr19 | 37338371 | 37338626 |
| chr19 | 37383741 | 37384056 |
| chr19 | 37445031 | 37445136 |
| chr19 | 37571361 | 37571596 |
| chr19 | 37610611 | 37610836 |
| chr19 | 38031951 | 38032086 |
| chr19 | 38254141 | 38254286 |
| chr19 | 38432851 | 38432966 |
| chr19 | 40305831 | 40306116 |
| chr19 | 40367681 | 40367796 |
| chr19 | 40399821 | 40400016 |
| chr19 | 40400031 | 40400396 |
| chr19 | 40406331 | 40406556 |
| chr19 | 40422891 | 40423006 |
| chr19 | 40439361 | 40439746 |
| chr19 | 40445281 | 40445516 |
| chr19 | 40451571 | 40451726 |
| chr19 | 40452121 | 40452506 |
| chr19 | 40470881 | 40471036 |
| chr19 | 40475711 | 40475966 |
| chr19 | 40500841 | 40501406 |
| chr19 | 40509661 | 40509886 |
| chr19 | 40538541 | 40538666 |
| chr19 | 40539331 | 40539626 |
| chr19 | 40545871 | 40546026 |
| chr19 | 40552901 | 40553086 |
| chr19 | 40584551 | 40584766 |
| chr19 | 40734891 | 40735006 |
| chr19 | 40914471 | 40914716 |

|       |          |          |
|-------|----------|----------|
| chr19 | 41353741 | 41353966 |
| chr19 | 41491661 | 41491796 |
| chr19 | 41599111 | 41599236 |
| chr19 | 41656401 | 41656646 |
| chr19 | 41871351 | 41871606 |
| chr19 | 41981551 | 41981676 |
| chr19 | 41995941 | 41996156 |
| chr19 | 42085971 | 42086086 |
| chr19 | 42129551 | 42129726 |
| chr19 | 42192831 | 42193056 |
| chr19 | 42331631 | 42331846 |
| chr19 | 42392291 | 42392506 |
| chr19 | 42583581 | 42583846 |
| chr19 | 42645231 | 42645486 |
| chr19 | 42734231 | 42734386 |
| chr19 | 42827791 | 42827976 |
| chr19 | 42830101 | 42830286 |
| chr19 | 43591011 | 43591266 |
| chr19 | 43638021 | 43638126 |
| chr19 | 43725721 | 43725906 |
| chr19 | 43737031 | 43737266 |
| chr19 | 43741451 | 43741726 |
| chr19 | 43872141 | 43872306 |
| chr19 | 44001161 | 44001256 |
| chr19 | 44001501 | 44001906 |
| chr19 | 44051171 | 44051376 |
| chr19 | 44142021 | 44142166 |
| chr19 | 44268541 | 44268796 |
| chr19 | 44318151 | 44318396 |
| chr19 | 44322671 | 44322856 |
| chr19 | 44323181 | 44323386 |
| chr19 | 44357741 | 44358046 |
| chr19 | 44367511 | 44367626 |
| chr19 | 44375001 | 44375246 |
| chr19 | 44377551 | 44377846 |
| chr19 | 44380101 | 44380206 |
| chr19 | 44380331 | 44380436 |
| chr19 | 44380631 | 44380756 |
| chr19 | 44462161 | 44463216 |
| chr19 | 44469471 | 44469726 |
| chr19 | 44479551 | 44480226 |
| chr19 | 44489741 | 44489896 |
| chr19 | 44534081 | 44534476 |
| chr19 | 44821151 | 44821276 |
| chr19 | 45082311 | 45082426 |
| chr19 | 45082441 | 45082676 |
| chr19 | 45104131 | 45104466 |
| chr19 | 45670481 | 45670836 |
| chr19 | 45870061 | 45870566 |
| chr19 | 46137401 | 46137766 |
| chr19 | 46413731 | 46413846 |
| chr19 | 46473981 | 46474166 |
| chr19 | 46530341 | 46530596 |

|       |          |          |
|-------|----------|----------|
| chr19 | 46531181 | 46531396 |
| chr19 | 46533521 | 46533836 |
| chr19 | 46533851 | 46533956 |
| chr19 | 46553801 | 46554056 |
| chr19 | 46585781 | 46586016 |
| chr19 | 46602911 | 46603246 |
| chr19 | 46676101 | 46676346 |
| chr19 | 46682721 | 46682966 |
| chr19 | 46683151 | 46683306 |
| chr19 | 46686881 | 46687046 |
| chr19 | 46692911 | 46693106 |
| chr19 | 46693451 | 46693836 |
| chr19 | 46698661 | 46698916 |
| chr19 | 46702481 | 46702726 |
| chr19 | 46716001 | 46716156 |
| chr19 | 46717021 | 46717136 |
| chr19 | 46717611 | 46717996 |
| chr19 | 46720331 | 46720616 |
| chr19 | 46724191 | 46724506 |
| chr19 | 46736861 | 46737156 |
| chr19 | 46742941 | 46743146 |
| chr19 | 46768031 | 46768156 |
| chr19 | 46770981 | 46771196 |
| chr19 | 46837111 | 46837736 |
| chr19 | 46838381 | 46838616 |
| chr19 | 46838731 | 46839586 |
| chr19 | 46862701 | 46862846 |
| chr19 | 46873111 | 46873276 |
| chr19 | 46877101 | 46877286 |
| chr19 | 46905961 | 46906306 |
| chr19 | 46982681 | 46982816 |
| chr19 | 47049411 | 47050066 |
| chr19 | 47050811 | 47051036 |
| chr19 | 47054201 | 47054326 |
| chr19 | 47058371 | 47058506 |
| chr19 | 47323521 | 47323686 |
| chr19 | 47335591 | 47335826 |
| chr19 | 47341071 | 47341216 |
| chr19 | 47352801 | 47353216 |
| chr19 | 47361691 | 47361946 |
| chr19 | 47362141 | 47362396 |
| chr19 | 47362551 | 47362666 |
| chr19 | 47371481 | 47371596 |
| chr19 | 47371911 | 47372036 |
| chr19 | 47372051 | 47372166 |
| chr19 | 47376521 | 47376856 |
| chr19 | 47376871 | 47377136 |
| chr19 | 47377491 | 47377646 |
| chr19 | 47380121 | 47380286 |
| chr19 | 47380541 | 47380996 |
| chr19 | 47381261 | 47381416 |
| chr19 | 47395501 | 47395716 |
| chr19 | 47481171 | 47481496 |



|       |          |          |
|-------|----------|----------|
| chr19 | 47484431 | 47484866 |
| chr19 | 47532441 | 47532696 |
| chr19 | 47539291 | 47539426 |
| chr19 | 47590161 | 47590436 |
| chr19 | 47592181 | 47592496 |
| chr19 | 47593301 | 47593436 |
| chr19 | 47722411 | 47722706 |
| chr19 | 47867341 | 47867456 |
| chr19 | 48168441 | 48168556 |
| chr19 | 52113751 | 52113976 |
| chr19 | 53094701 | 53094796 |
| chr19 | 53097751 | 53098006 |
| chr19 | 53102691 | 53103016 |
| chr19 | 53103081 | 53103256 |
| chr19 | 53103841 | 53104096 |
| chr19 | 53123901 | 53124056 |
| chr19 | 53126091 | 53126216 |
| chr19 | 53126651 | 53126906 |
| chr19 | 53141181 | 53141316 |
| chr19 | 53149231 | 53149456 |
| chr19 | 53159091 | 53159316 |
| chr19 | 53204871 | 53204976 |
| chr19 | 53205021 | 53205386 |
| chr19 | 53228151 | 53228346 |
| chr19 | 53255931 | 53256156 |
| chr19 | 53256381 | 53256506 |
| chr19 | 53268761 | 53269096 |
| chr19 | 53269641 | 53269906 |
| chr19 | 53402771 | 53403086 |
| chr19 | 53404581 | 53405176 |
| chr19 | 53418111 | 53418326 |
| chr19 | 53418571 | 53419256 |
| chr19 | 53522661 | 53522866 |
| chr19 | 53525191 | 53525786 |
| chr19 | 53609791 | 53610106 |
| chr19 | 53610141 | 53610546 |
| chr19 | 53724581 | 53724776 |
| chr19 | 53976661 | 53976916 |
| chr19 | 54085731 | 54085966 |
| chr19 | 55152881 | 55153056 |
| chr19 | 55180291 | 55180516 |
| chr19 | 55425381 | 55425756 |
| chr19 | 55606331 | 55606476 |
| chr19 | 55637391 | 55637656 |
| chr19 | 55637711 | 55638166 |
| chr19 | 55682611 | 55682826 |
| chr19 | 55854441 | 55854746 |
| chr19 | 55859171 | 55859486 |
| chr19 | 55859591 | 55860046 |
| chr19 | 55865941 | 55866066 |
| chr19 | 55878401 | 55878596 |
| chr19 | 55881661 | 55881966 |
| chr19 | 55893541 | 55893796 |

|       |          |          |
|-------|----------|----------|
| chr19 | 55900641 | 55900826 |
| chr19 | 55905591 | 55905856 |
| chr19 | 55913441 | 55913716 |
| chr19 | 55915021 | 55915276 |
| chr19 | 55915431 | 55915556 |
| chr19 | 55926061 | 55926376 |
| chr19 | 56179881 | 56180056 |
| chr19 | 56185041 | 56185366 |
| chr19 | 56190701 | 56190966 |
| chr19 | 56208051 | 56208216 |
| chr19 | 56209891 | 56210046 |
| chr19 | 56250421 | 56250676 |
| chr19 | 56327091 | 56327356 |
| chr19 | 56327921 | 56328076 |
| chr19 | 56581721 | 56582026 |
| chr19 | 56609141 | 56609866 |
| chr19 | 56670051 | 56670346 |
| chr19 | 56725541 | 56725716 |
| chr19 | 56752971 | 56753256 |
| chr19 | 56757291 | 56757546 |
| chr19 | 56777851 | 56778206 |
| chr19 | 56818681 | 56818936 |
| chr19 | 57010881 | 57011036 |
| chr19 | 57122591 | 57122716 |
| chr19 | 57169581 | 57169896 |
| chr19 | 57181071 | 57181466 |
| chr19 | 57191771 | 57192016 |
| chr19 | 57264051 | 57264166 |
| chr19 | 57279411 | 57279546 |
| chr19 | 57439431 | 57439696 |
| chr19 | 57442041 | 57442286 |
| chr19 | 57664141 | 57664346 |
| chr19 | 57776521 | 57776866 |
| chr19 | 58090121 | 58090296 |
| chr19 | 58192801 | 58192916 |
| chr19 | 58891221 | 58891366 |
| chr19 | 58923591 | 58923756 |
| chr19 | 59011981 | 59012146 |
| chr19 | 59533881 | 59534046 |
| chr19 | 61156621 | 61156846 |
| chr18 | 3005821  | 3006036  |
| chr18 | 4313941  | 4314106  |
| chr18 | 4673901  | 4674126  |
| chr18 | 4797051  | 4797176  |
| chr18 | 4980381  | 4980646  |
| chr18 | 4990161  | 4990326  |
| chr18 | 5030531  | 5030796  |
| chr18 | 5101301  | 5101426  |
| chr18 | 5139241  | 5139386  |
| chr18 | 5199961  | 5200226  |
| chr18 | 5218361  | 5218606  |
| chr18 | 5507541  | 5507666  |
| chr18 | 5835471  | 5835606  |

|       |          |          |
|-------|----------|----------|
| chr18 | 6156391  | 6156556  |
| chr18 | 6163101  | 6163336  |
| chr18 | 6208061  | 6208316  |
| chr18 | 6480261  | 6480476  |
| chr18 | 6954931  | 6955136  |
| chr18 | 10839761 | 10840036 |
| chr18 | 11197931 | 11198076 |
| chr18 | 11551351 | 11551696 |
| chr18 | 11997601 | 11997856 |
| chr18 | 11999181 | 11999426 |
| chr18 | 12060871 | 12061156 |
| chr18 | 12101931 | 12102186 |
| chr18 | 12133421 | 12133626 |
| chr18 | 12968261 | 12968406 |
| chr18 | 12998141 | 12998306 |
| chr18 | 12998441 | 12998566 |
| chr18 | 13000811 | 13000976 |
| chr18 | 13923801 | 13923966 |
| chr18 | 21089871 | 21090016 |
| chr18 | 21121141 | 21121546 |
| chr18 | 23279441 | 23279636 |
| chr18 | 23966801 | 23966926 |
| chr18 | 23979871 | 23980126 |
| chr18 | 24043321 | 24043456 |
| chr18 | 24180241 | 24180406 |
| chr18 | 32081881 | 32082106 |
| chr18 | 32091581 | 32091736 |
| chr18 | 32299321 | 32299456 |
| chr18 | 32539831 | 32539996 |
| chr18 | 32715891 | 32715976 |
| chr18 | 33995661 | 33995916 |
| chr18 | 34500301 | 34500596 |
| chr18 | 34516051 | 34516286 |
| chr18 | 34566751 | 34566906 |
| chr18 | 35027631 | 35027796 |
| chr18 | 35416361 | 35416596 |
| chr18 | 35704031 | 35704166 |
| chr18 | 35836701 | 35837116 |
| chr18 | 36102381 | 36102636 |
| chr18 | 37972501 | 37972696 |
| chr18 | 37993721 | 37993856 |
| chr18 | 38002461 | 38002686 |
| chr18 | 38012821 | 38013006 |
| chr18 | 38457701 | 38457946 |
| chr18 | 38702781 | 38703026 |
| chr18 | 38759081 | 38759246 |
| chr18 | 39262041 | 39262196 |
| chr18 | 39500301 | 39500426 |
| chr18 | 39540021 | 39540206 |
| chr18 | 39544711 | 39544886 |
| chr18 | 39934451 | 39935186 |
| chr18 | 43135451 | 43135676 |
| chr18 | 43641701 | 43641816 |

|       |          |          |
|-------|----------|----------|
| chr18 | 44657841 | 44657996 |
| chr18 | 44658111 | 44658486 |
| chr18 | 44702511 | 44702636 |
| chr18 | 46616951 | 46617066 |
| chr18 | 46774871 | 46774996 |
| chr18 | 46795021 | 46795146 |
| chr18 | 46887081 | 46887346 |
| chr18 | 46887591 | 46887736 |
| chr18 | 46896681 | 46896806 |
| chr18 | 46903561 | 46903866 |
| chr18 | 46904151 | 46904286 |
| chr18 | 47331921 | 47332106 |
| chr18 | 50012561 | 50012836 |
| chr18 | 50141951 | 50142106 |
| chr18 | 50144821 | 50144986 |
| chr18 | 50182031 | 50182186 |
| chr18 | 50201971 | 50202146 |
| chr18 | 50206151 | 50206286 |
| chr18 | 50266531 | 50266806 |
| chr18 | 52780071 | 52780186 |
| chr18 | 53398071 | 53398346 |
| chr18 | 53450711 | 53451026 |
| chr18 | 53576321 | 53576466 |
| chr18 | 53577251 | 53577376 |
| chr18 | 53622271 | 53622456 |
| chr18 | 54773391 | 54773626 |
| chr18 | 55072531 | 55072656 |
| chr18 | 55085791 | 55086046 |
| chr18 | 55138781 | 55138996 |
| chr18 | 55200641 | 55200786 |
| chr18 | 55234421 | 55234606 |
| chr18 | 56616551 | 56616676 |
| chr18 | 56917891 | 56918176 |
| chr18 | 56923621 | 56923776 |
| chr18 | 57080191 | 57080316 |
| chr18 | 57531031 | 57531196 |
| chr18 | 57773081 | 57773306 |
| chr18 | 57926691 | 57926976 |
| chr18 | 60642701 | 60642916 |
| chr18 | 60683771 | 60684056 |
| chr18 | 60850411 | 60850516 |
| chr18 | 60889631 | 60889756 |
| chr18 | 61107791 | 61108616 |
| chr18 | 61181601 | 61181866 |
| chr18 | 61182381 | 61182606 |
| chr18 | 61446961 | 61447126 |
| chr18 | 61456781 | 61456936 |
| chr18 | 61470681 | 61470966 |
| chr18 | 61470971 | 61471166 |
| chr18 | 61471191 | 61471346 |
| chr18 | 61506011 | 61506226 |
| chr18 | 61522621 | 61522806 |
| chr18 | 61533891 | 61534146 |

|       |          |          |
|-------|----------|----------|
| chr18 | 61557061 | 61557176 |
| chr18 | 61557301 | 61557756 |
| chr18 | 61671131 | 61671336 |
| chr18 | 61792321 | 61792536 |
| chr18 | 61807501 | 61807676 |
| chr18 | 61807801 | 61807926 |
| chr18 | 61808281 | 61808396 |
| chr18 | 61808401 | 61808546 |
| chr18 | 61821051 | 61821256 |
| chr18 | 61850711 | 61850846 |
| chr18 | 62209711 | 62209836 |
| chr18 | 62235861 | 62235976 |
| chr18 | 62630261 | 62630416 |
| chr18 | 62940221 | 62940376 |
| chr18 | 63083661 | 63083866 |
| chr18 | 63084031 | 63084256 |
| chr18 | 64674831 | 64675046 |
| chr18 | 64806011 | 64806146 |
| chr18 | 64949801 | 64950056 |
| chr18 | 65121521 | 65121666 |
| chr18 | 65164871 | 65164996 |
| chr18 | 65202581 | 65202806 |
| chr18 | 65255561 | 65255706 |
| chr18 | 65302911 | 65303076 |
| chr18 | 65391421 | 65391576 |
| chr18 | 65739571 | 65739676 |
| chr18 | 65752781 | 65753026 |
| chr18 | 65753431 | 65753686 |
| chr18 | 65965411 | 65965716 |
| chr18 | 66159191 | 66159446 |
| chr18 | 66407891 | 66408046 |
| chr18 | 67438851 | 67439416 |
| chr18 | 67511411 | 67511576 |
| chr18 | 67620481 | 67620666 |
| chr18 | 67936041 | 67936176 |
| chr18 | 68204161 | 68204466 |
| chr18 | 68221701 | 68222016 |
| chr18 | 68324571 | 68324816 |
| chr18 | 68416891 | 68417256 |
| chr18 | 69103131 | 69103436 |
| chr18 | 69591881 | 69592066 |
| chr18 | 69790081 | 69790416 |
| chr18 | 69825831 | 69826086 |
| chr18 | 69826351 | 69826486 |
| chr18 | 69849161 | 69849436 |
| chr18 | 69849471 | 69849656 |
| chr18 | 69850001 | 69850126 |
| chr18 | 70693571 | 70693686 |
| chr18 | 70705091 | 70705286 |
| chr18 | 70729321 | 70729456 |
| chr18 | 73947761 | 73947916 |
| chr18 | 74429001 | 74429256 |
| chr18 | 74941461 | 74941666 |

|       |          |          |
|-------|----------|----------|
| chr18 | 75210181 | 75210436 |
| chr18 | 75494661 | 75494836 |
| chr18 | 75537101 | 75537236 |
| chr18 | 75566881 | 75567006 |
| chr18 | 75599551 | 75599806 |
| chr18 | 75607031 | 75607296 |
| chr18 | 75662461 | 75662726 |
| chr18 | 75772131 | 75772246 |
| chr18 | 75843211 | 75843376 |
| chr18 | 76061691 | 76062016 |
| chr18 | 77246151 | 77246386 |
| chr18 | 77971391 | 77971576 |
| chr18 | 78014981 | 78015136 |
| chr18 | 78137431 | 78137656 |
| chr18 | 78214291 | 78214476 |
| chr18 | 78410421 | 78410646 |
| chr18 | 78681511 | 78681746 |
| chr18 | 79193971 | 79194216 |
| chr18 | 79195001 | 79195156 |
| chr18 | 80333431 | 80333596 |
| chr18 | 80335001 | 80335206 |
| chr18 | 80344491 | 80344626 |
| chr18 | 80411951 | 80412186 |
| chr18 | 80458191 | 80458386 |
| chr18 | 80569501 | 80569996 |
| chr18 | 80769271 | 80769486 |
| chr18 | 80788031 | 80788336 |
| chr18 | 82390481 | 82390626 |
| chr18 | 82580531 | 82580676 |
| chr18 | 82688001 | 82688176 |
| chr18 | 82725121 | 82725266 |
| chr18 | 82823071 | 82823216 |
| chr18 | 82860311 | 82860516 |
| chr18 | 82905871 | 82906126 |
| chr18 | 82938251 | 82938366 |
| chr18 | 82939131 | 82939286 |
| chr18 | 83087341 | 83087456 |
| chr18 | 83110441 | 83110566 |
| chr18 | 83147261 | 83147526 |
| chr18 | 83158251 | 83158386 |
| chr18 | 84259711 | 84259846 |
| chr18 | 84391551 | 84391806 |
| chr18 | 84899351 | 84899686 |
| chr18 | 85025071 | 85025276 |
| chr18 | 85027521 | 85027696 |
| chr18 | 85602101 | 85602266 |
| chrX  | 10758841 | 10759246 |
| chrX  | 11128541 | 11128696 |
| chrX  | 11575501 | 11575706 |
| chrX  | 11829351 | 11829556 |
| chrX  | 13096711 | 13096866 |
| chrX  | 45721541 | 45721776 |
| chrX  | 96488091 | 96488306 |

|      |           |           |
|------|-----------|-----------|
| chrX | 109484471 | 109484706 |
| chrX | 130551441 | 130551556 |
| chrX | 137040111 | 137040266 |
| chrX | 137045651 | 137045846 |
| chrX | 137045991 | 137046216 |
| chrX | 137133971 | 137134306 |
| chrX | 138870031 | 138870476 |
| chrX | 139881361 | 139881616 |
| chrX | 147853431 | 147853686 |
| chrX | 155813541 | 155813766 |
| chrX | 156348931 | 156349036 |
| chrX | 162675461 | 162675706 |
| chrX | 162912691 | 162912946 |
| chrX | 165740701 | 165740936 |
| chrX | 166419341 | 166419586 |
| chrX | 166427611 | 166427786 |
| chrX | 166431951 | 166432096 |
| chrX | 166432531 | 166432796 |
| chrX | 166446531 | 166446736 |
