# Supplementary material for: Dynamic hydroxymethylation of deoxyribonucleic acid marks differentiation-associated enhancers
Source: PubMed Central journal article supplement — Nucleic Acids Res. 2012 Jun 21;40(17):8255–65. doi: 10.1093/nar/gks595 (PMC3458548; doi:10.1093/nar/gks595), 2012-06-21
Supplement: supp_gks595_nar-01065-v-2012-File009.pdf [file supp_gks595_nar-01065-v-2012-File009.pdf]

Supplementary Table 6: 5hmC-down regions in P19 cells treated with RA for 48 hrs (mm8)

| chr  | Start    | Stop     |
|------|----------|----------|
| chr7 | 4124601  | 4124706  |
| chr7 | 4131081  | 4131186  |
| chr7 | 5996811  | 5996906  |
| chr7 | 10772381 | 10772596 |
| chr7 | 15305101 | 15305296 |
| chr7 | 16004191 | 16004326 |
| chr7 | 16006261 | 16006346 |
| chr7 | 16068581 | 16068666 |
| chr7 | 18360551 | 18360666 |
| chr7 | 18508091 | 18508246 |
| chr7 | 18623351 | 18623696 |
| chr7 | 18850821 | 18850916 |
| chr7 | 19035741 | 19035866 |
| chr7 | 24082641 | 24082746 |
| chr7 | 24628231 | 24628396 |
| chr7 | 24646601 | 24646836 |
| chr7 | 24652581 | 24652686 |
| chr7 | 24712071 | 24712266 |
| chr7 | 24723451 | 24723546 |
| chr7 | 24864541 | 24864846 |
| chr7 | 24997031 | 24997246 |
| chr7 | 25099501 | 25099656 |
| chr7 | 25353971 | 25354096 |
| chr7 | 25378071 | 25378216 |
| chr7 | 25384431 | 25384576 |
| chr7 | 25398621 | 25398756 |
| chr7 | 25472371 | 25472496 |
| chr7 | 27031111 | 27031266 |
| chr7 | 27142461 | 27142576 |
| chr7 | 27142731 | 27142826 |
| chr7 | 27363161 | 27363256 |
| chr7 | 28695601 | 28695936 |
| chr7 | 28788231 | 28788436 |
| chr7 | 28876261 | 28876366 |
| chr7 | 28881421 | 28881526 |
| chr7 | 29059141 | 29059306 |
| chr7 | 30143971 | 30144186 |
| chr7 | 30162051 | 30162176 |
| chr7 | 30232531 | 30233096 |
| chr7 | 30500851 | 30500956 |
| chr7 | 30750921 | 30751046 |
| chr7 | 34456571 | 34456726 |
| chr7 | 35246261 | 35246436 |
| chr7 | 40675821 | 40675916 |
| chr7 | 44205721 | 44205836 |
| chr7 | 44222571 | 44222756 |
| chr7 | 44313081 | 44313266 |
| chr7 | 44313681 | 44313796 |
| chr7 | 44469761 | 44469906 |

|      |           |           |
|------|-----------|-----------|
| chr7 | 44500851  | 44500996  |
| chr7 | 45033761  | 45033916  |
| chr7 | 45035201  | 45035366  |
| chr7 | 45036711  | 45036866  |
| chr7 | 45097131  | 45097286  |
| chr7 | 45107121  | 45107216  |
| chr7 | 45107341  | 45107516  |
| chr7 | 45136031  | 45136226  |
| chr7 | 45384341  | 45384496  |
| chr7 | 45509881  | 45509996  |
| chr7 | 45725281  | 45725506  |
| chr7 | 45797051  | 45797156  |
| chr7 | 46246251  | 46246426  |
| chr7 | 46341271  | 46341406  |
| chr7 | 46703191  | 46703326  |
| chr7 | 49508211  | 49508316  |
| chr7 | 49508411  | 49508546  |
| chr7 | 49784691  | 49784906  |
| chr7 | 49810671  | 49810786  |
| chr7 | 63223801  | 63223916  |
| chr7 | 65793901  | 65793996  |
| chr7 | 66170821  | 66170936  |
| chr7 | 67144931  | 67145116  |
| chr7 | 69996401  | 69996546  |
| chr7 | 78662831  | 78662946  |
| chr7 | 79376501  | 79376616  |
| chr7 | 79684041  | 79684256  |
| chr7 | 79735831  | 79735996  |
| chr7 | 79884361  | 79884446  |
| chr7 | 79892271  | 79892426  |
| chr7 | 80652731  | 80652826  |
| chr7 | 82833591  | 82833746  |
| chr7 | 89671831  | 89671966  |
| chr7 | 90966691  | 90966806  |
| chr7 | 99384251  | 99384456  |
| chr7 | 101270351 | 101270506 |
| chr7 | 105355371 | 105355556 |
| chr7 | 108931721 | 108931826 |
| chr7 | 113700821 | 113700946 |
| chr7 | 113702061 | 113702216 |
| chr7 | 113926381 | 113926516 |
| chr7 | 118045701 | 118045876 |
| chr7 | 118869701 | 118869836 |
| chr7 | 121688421 | 121688556 |
| chr7 | 122020401 | 122020526 |
| chr7 | 122229541 | 122229736 |
| chr7 | 123042621 | 123042736 |
| chr7 | 123806551 | 123806716 |
| chr7 | 126136331 | 126136436 |
| chr7 | 126149281 | 126149406 |
| chr7 | 126256821 | 126256976 |
| chr7 | 126605821 | 126605936 |
| chr7 | 126615271 | 126615426 |

|      |           |           |
|------|-----------|-----------|
| chr7 | 126645931 | 126646076 |
| chr7 | 127404491 | 127404596 |
| chr7 | 128035521 | 128035686 |
| chr7 | 128043861 | 128043976 |
| chr7 | 130381381 | 130381526 |
| chr7 | 133045731 | 133045876 |
| chr7 | 134548701 | 134548856 |
| chr7 | 134615811 | 134615936 |
| chr7 | 136839161 | 136839356 |
| chr7 | 139260071 | 139260206 |
| chr7 | 141582651 | 141582836 |
| chr7 | 142292661 | 142292796 |
| chr7 | 142367231 | 142367386 |
| chr7 | 143075501 | 143075606 |
| chr7 | 143299851 | 143299996 |
| chr6 | 3918321   | 3918466   |
| chr6 | 3954131   | 3954256   |
| chr6 | 6801321   | 6801426   |
| chr6 | 6804251   | 6804426   |
| chr6 | 29457181  | 29457326  |
| chr6 | 29669031  | 29669196  |
| chr6 | 30117621  | 30117716  |
| chr6 | 30121371  | 30121466  |
| chr6 | 31091331  | 31091486  |
| chr6 | 31125781  | 31125936  |
| chr6 | 31125941  | 31126096  |
| chr6 | 38135981  | 38136106  |
| chr6 | 38613621  | 38613836  |
| chr6 | 38627821  | 38627956  |
| chr6 | 39156401  | 39156516  |
| chr6 | 39799441  | 39799596  |
| chr6 | 42191511  | 42191786  |
| chr6 | 42251481  | 42251606  |
| chr6 | 47580831  | 47580966  |
| chr6 | 49613771  | 49613906  |
| chr6 | 52720461  | 52720596  |
| chr6 | 55318621  | 55318766  |
| chr6 | 67126301  | 67126416  |
| chr6 | 83004481  | 83004616  |
| chr6 | 83101441  | 83101636  |
| chr6 | 83206401  | 83206536  |
| chr6 | 83715761  | 83715846  |
| chr6 | 85389411  | 85389496  |
| chr6 | 88903881  | 88903986  |
| chr6 | 89262631  | 89262746  |
| chr6 | 89276051  | 89276186  |
| chr6 | 90513581  | 90513756  |
| chr6 | 90586441  | 90586566  |
| chr6 | 90644421  | 90644546  |
| chr6 | 91241051  | 91241166  |
| chr6 | 91772681  | 91772856  |
| chr6 | 91772871  | 91772996  |
| chr6 | 91773661  | 91773756  |

|      |           |           |
|------|-----------|-----------|
| chr6 | 94613161  | 94613296  |
| chr6 | 97244861  | 97244996  |
| chr6 | 98950181  | 98950376  |
| chr6 | 98975211  | 98975576  |
| chr6 | 99692411  | 99692496  |
| chr6 | 100129391 | 100129496 |
| chr6 | 100160931 | 100161036 |
| chr6 | 100299931 | 100300026 |
| chr6 | 101229801 | 101229956 |
| chr6 | 103477961 | 103478116 |
| chr6 | 108218601 | 108218846 |
| chr6 | 108651661 | 108651886 |
| chr6 | 113437231 | 113437356 |
| chr6 | 113457931 | 113458096 |
| chr6 | 113714241 | 113714426 |
| chr6 | 114262591 | 114262696 |
| chr6 | 115890531 | 115890676 |
| chr6 | 115923361 | 115923506 |
| chr6 | 116786881 | 116787016 |
| chr6 | 117148021 | 117148166 |
| chr6 | 118272611 | 118272826 |
| chr6 | 118370501 | 118370686 |
| chr6 | 118575871 | 118576006 |
| chr6 | 118802391 | 118802526 |
| chr6 | 119013081 | 119013186 |
| chr6 | 119159901 | 119160046 |
| chr6 | 120153311 | 120153476 |
| chr6 | 120153961 | 120154236 |
| chr6 | 120493931 | 120494106 |
| chr6 | 120609881 | 120610066 |
| chr6 | 120610151 | 120610276 |
| chr6 | 120881021 | 120881146 |
| chr6 | 121341821 | 121341946 |
| chr6 | 121390681 | 121390826 |
| chr6 | 121428651 | 121428796 |
| chr6 | 122635601 | 122635746 |
| chr6 | 124720151 | 124720316 |
| chr6 | 124806141 | 124806276 |
| chr6 | 124816181 | 124816346 |
| chr6 | 124825981 | 124826126 |
| chr6 | 124875801 | 124875956 |
| chr6 | 124876021 | 124876166 |
| chr6 | 124877331 | 124877486 |
| chr6 | 125015481 | 125015596 |
| chr6 | 125314311 | 125314456 |
| chr6 | 125326731 | 125326826 |
| chr6 | 125372991 | 125373146 |
| chr6 | 125396291 | 125396456 |
| chr6 | 125446761 | 125446906 |
| chr6 | 125469181 | 125469336 |
| chr6 | 125478031 | 125478196 |
| chr6 | 126082881 | 126082946 |
| chr6 | 126107261 | 126107406 |

|      |           |           |
|------|-----------|-----------|
| chr6 | 126705351 | 126705456 |
| chr6 | 126728381 | 126728496 |
| chr6 | 126986411 | 126986596 |
| chr6 | 127074331 | 127074446 |
| chr6 | 127328961 | 127329256 |
| chr6 | 127461501 | 127461676 |
| chr6 | 127634661 | 127634796 |
| chr6 | 127649371 | 127649496 |
| chr6 | 128251641 | 128251796 |
| chr6 | 128304661 | 128304766 |
| chr6 | 128305511 | 128305626 |
| chr6 | 133058021 | 133058176 |
| chr6 | 134087581 | 134087706 |
| chr6 | 134812191 | 134812346 |
| chr6 | 135235421 | 135235556 |
| chr6 | 135494681 | 135494846 |
| chr6 | 136684091 | 136684226 |
| chr6 | 140580251 | 140580466 |
| chr6 | 140582201 | 140582366 |
| chr6 | 140782301 | 140782456 |
| chr6 | 142961331 | 142961526 |
| chr6 | 142962001 | 142962166 |
| chr6 | 145074231 | 145074366 |
| chr6 | 146989901 | 146989996 |
| chr6 | 147034251 | 147034406 |
| chr6 | 147068591 | 147068746 |
| chr6 | 148730321 | 148730446 |
| chr5 | 20217461  | 20217556  |
| chr5 | 20651661  | 20651816  |
| chr5 | 20895621  | 20895786  |
| chr5 | 23203961  | 23204096  |
| chr5 | 23830671  | 23830816  |
| chr5 | 23853161  | 23853386  |
| chr5 | 24015031  | 24015126  |
| chr5 | 24103521  | 24103616  |
| chr5 | 24288711  | 24288896  |
| chr5 | 25232001  | 25232126  |
| chr5 | 26518181  | 26518356  |
| chr5 | 27148291  | 27148396  |
| chr5 | 28448171  | 28448316  |
| chr5 | 28488471  | 28488576  |
| chr5 | 28501751  | 28501896  |
| chr5 | 34022221  | 34022366  |
| chr5 | 34643891  | 34644086  |
| chr5 | 35395931  | 35396026  |
| chr5 | 37312781  | 37312996  |
| chr5 | 37364551  | 37364706  |
| chr5 | 38943951  | 38944136  |
| chr5 | 42033521  | 42033716  |
| chr5 | 42182901  | 42183076  |
| chr5 | 44764611  | 44764706  |
| chr5 | 67331981  | 67332056  |
| chr5 | 72475821  | 72475976  |

|      |           |           |
|------|-----------|-----------|
| chr5 | 73159001  | 73159176  |
| chr5 | 73928441  | 73928576  |
| chr5 | 74359751  | 74359906  |
| chr5 | 75256551  | 75256766  |
| chr5 | 75348801  | 75348896  |
| chr5 | 75349201  | 75349296  |
| chr5 | 75763321  | 75763436  |
| chr5 | 89786441  | 89786596  |
| chr5 | 92478121  | 92478276  |
| chr5 | 93018691  | 93018886  |
| chr5 | 93069791  | 93070016  |
| chr5 | 93268471  | 93268566  |
| chr5 | 93272821  | 93272966  |
| chr5 | 93439881  | 93440046  |
| chr5 | 93866311  | 93866446  |
| chr5 | 93914711  | 93914806  |
| chr5 | 94061901  | 94062046  |
| chr5 | 98524411  | 98524566  |
| chr5 | 100097601 | 100097726 |
| chr5 | 101941961 | 101942096 |
| chr5 | 103670191 | 103670326 |
| chr5 | 103930641 | 103930816 |
| chr5 | 104053901 | 104054076 |
| chr5 | 104265721 | 104265846 |
| chr5 | 106584511 | 106584666 |
| chr5 | 108917871 | 108917986 |
| chr5 | 110345391 | 110345696 |
| chr5 | 111412191 | 111412406 |
| chr5 | 111526211 | 111526386 |
| chr5 | 111679231 | 111679366 |
| chr5 | 111923941 | 111924066 |
| chr5 | 112151811 | 112151956 |
| chr5 | 112281851 | 112281956 |
| chr5 | 112290331 | 112290436 |
| chr5 | 112481051 | 112481176 |
| chr5 | 112546321 | 112546426 |
| chr5 | 113538501 | 113538656 |
| chr5 | 113573431 | 113573566 |
| chr5 | 113811041 | 113811136 |
| chr5 | 113811571 | 113811726 |
| chr5 | 113871461 | 113871746 |
| chr5 | 113984911 | 113985076 |
| chr5 | 114235991 | 114236146 |
| chr5 | 114251811 | 114251946 |
| chr5 | 114408871 | 114409066 |
| chr5 | 114557811 | 114557916 |
| chr5 | 114877701 | 114877866 |
| chr5 | 114931451 | 114931746 |
| chr5 | 115242981 | 115243176 |
| chr5 | 115475901 | 115476236 |
| chr5 | 115711671 | 115711826 |
| chr5 | 115714871 | 115714976 |
| chr5 | 115737551 | 115737696 |

|      |           |           |
|------|-----------|-----------|
| chr5 | 115816691 | 115816826 |
| chr5 | 116116171 | 116116286 |
| chr5 | 116167991 | 116168256 |
| chr5 | 116259021 | 116259186 |
| chr5 | 116267311 | 116267476 |
| chr5 | 116268421 | 116268506 |
| chr5 | 116268521 | 116268746 |
| chr5 | 116415161 | 116415286 |
| chr5 | 116676821 | 116676996 |
| chr5 | 116705851 | 116705956 |
| chr5 | 116817671 | 116817796 |
| chr5 | 117050901 | 117051126 |
| chr5 | 117349291 | 117349406 |
| chr5 | 117421521 | 117421716 |
| chr5 | 117609341 | 117609556 |
| chr5 | 117609571 | 117609716 |
| chr5 | 117676421 | 117676576 |
| chr5 | 117676731 | 117676866 |
| chr5 | 118123831 | 118123946 |
| chr5 | 118127211 | 118127326 |
| chr5 | 118159251 | 118159396 |
| chr5 | 118239521 | 118239636 |
| chr5 | 118292171 | 118292356 |
| chr5 | 118300471 | 118300676 |
| chr5 | 118579931 | 118580186 |
| chr5 | 118634901 | 118635006 |
| chr5 | 118657461 | 118657576 |
| chr5 | 118855731 | 118855866 |
| chr5 | 119886991 | 119887116 |
| chr5 | 119908111 | 119908226 |
| chr5 | 120055081 | 120055186 |
| chr5 | 120057111 | 120057366 |
| chr5 | 120104171 | 120104296 |
| chr5 | 120545311 | 120545466 |
| chr5 | 120618561 | 120618716 |
| chr5 | 120773521 | 120773696 |
| chr5 | 120845791 | 120845936 |
| chr5 | 120892031 | 120892256 |
| chr5 | 120943791 | 120943916 |
| chr5 | 122106211 | 122106416 |
| chr5 | 122372301 | 122372536 |
| chr5 | 122572431 | 122572616 |
| chr5 | 122592811 | 122592926 |
| chr5 | 123432791 | 123432876 |
| chr5 | 123518001 | 123518276 |
| chr5 | 123584451 | 123584586 |
| chr5 | 123758701 | 123758796 |
| chr5 | 123860101 | 123860336 |
| chr5 | 123914201 | 123914346 |
| chr5 | 124337321 | 124337436 |
| chr5 | 124338131 | 124338256 |
| chr5 | 124448051 | 124448226 |
| chr5 | 124797641 | 124797776 |

|      |           |           |
|------|-----------|-----------|
| chr5 | 125877731 | 125877886 |
| chr5 | 128839691 | 128839916 |
| chr5 | 129134481 | 129134666 |
| chr5 | 129511471 | 129511606 |
| chr5 | 129681921 | 129682066 |
| chr5 | 134679381 | 134679476 |
| chr5 | 134720681 | 134720776 |
| chr5 | 134813221 | 134813386 |
| chr5 | 135026991 | 135027136 |
| chr5 | 135028731 | 135028876 |
| chr5 | 135265901 | 135266016 |
| chr5 | 135320411 | 135320586 |
| chr5 | 135361901 | 135362026 |
| chr5 | 135790261 | 135790426 |
| chr5 | 136141871 | 136142006 |
| chr5 | 136153461 | 136153676 |
| chr5 | 136153701 | 136153896 |
| chr5 | 136373261 | 136373386 |
| chr5 | 136721101 | 136721206 |
| chr5 | 136905011 | 136905156 |
| chr5 | 137398191 | 137398346 |
| chr5 | 137401281 | 137401386 |
| chr5 | 137582221 | 137582366 |
| chr5 | 137798371 | 137798466 |
| chr5 | 137843431 | 137843506 |
| chr5 | 137994501 | 137994626 |
| chr5 | 138505351 | 138505486 |
| chr5 | 138505541 | 138505766 |
| chr5 | 138948191 | 138948286 |
| chr5 | 139545961 | 139546126 |
| chr5 | 139769791 | 139769946 |
| chr5 | 139854141 | 139854236 |
| chr5 | 139979621 | 139979816 |
| chr5 | 139980071 | 139980206 |
| chr5 | 140056651 | 140056766 |
| chr5 | 140141831 | 140142036 |
| chr5 | 140230111 | 140230286 |
| chr5 | 142469271 | 142469386 |
| chr5 | 142861851 | 142861956 |
| chr5 | 142941531 | 142941646 |
| chr5 | 142942191 | 142942366 |
| chr5 | 142944791 | 142944916 |
| chr5 | 142945301 | 142945436 |
| chr5 | 142973091 | 142973156 |
| chr5 | 143038961 | 143039196 |
| chr5 | 143207911 | 143208086 |
| chr5 | 143622801 | 143622916 |
| chr5 | 143635541 | 143635656 |
| chr5 | 144450321 | 144450476 |
| chr5 | 144458561 | 144458706 |
| chr5 | 144528881 | 144529006 |
| chr5 | 147023521 | 147023706 |
| chr5 | 147095011 | 147095146 |



|      |           |           |
|------|-----------|-----------|
| chr5 | 147502831 | 147502986 |
| chr5 | 147504351 | 147504486 |
| chr5 | 147583471 | 147583566 |
| chr5 | 147621201 | 147621316 |
| chr5 | 147734071 | 147734246 |
| chr5 | 148037811 | 148037876 |
| chr5 | 148145641 | 148145766 |
| chr5 | 148190351 | 148190526 |
| chr5 | 149164211 | 149164356 |
| chr5 | 149164491 | 149164646 |
| chr5 | 149288021 | 149288146 |
| chr5 | 149556461 | 149556596 |
| chr5 | 149710221 | 149710386 |
| chr5 | 150384201 | 150384346 |
| chr5 | 150861861 | 150861996 |
| chr5 | 151487131 | 151487256 |
| chr4 | 22594851  | 22595006  |
| chr4 | 33516901  | 33517026  |
| chr4 | 33855481  | 33855586  |
| chr4 | 34251261  | 34251356  |
| chr4 | 35070341  | 35070406  |
| chr4 | 35498241  | 35498356  |
| chr4 | 41847411  | 41847576  |
| chr4 | 43428431  | 43428556  |
| chr4 | 43621221  | 43621366  |
| chr4 | 45004581  | 45004696  |
| chr4 | 45626451  | 45626596  |
| chr4 | 45822061  | 45822196  |
| chr4 | 45832511  | 45832726  |
| chr4 | 45890621  | 45890746  |
| chr4 | 45917941  | 45918106  |
| chr4 | 46369311  | 46369466  |
| chr4 | 46388521  | 46388716  |
| chr4 | 46555491  | 46555766  |
| chr4 | 46590791  | 46590916  |
| chr4 | 47133261  | 47133376  |
| chr4 | 55071391  | 55071476  |
| chr4 | 55230101  | 55230306  |
| chr4 | 62000581  | 62000686  |
| chr4 | 62874921  | 62875046  |
| chr4 | 62889631  | 62889786  |
| chr4 | 81903801  | 81903926  |
| chr4 | 82792841  | 82792966  |
| chr4 | 88174041  | 88174166  |
| chr4 | 88762731  | 88762856  |
| chr4 | 94244471  | 94244626  |
| chr4 | 94570891  | 94570986  |
| chr4 | 94626771  | 94626936  |
| chr4 | 97256771  | 97256876  |
| chr4 | 98692151  | 98692306  |
| chr4 | 104412141 | 104412246 |
| chr4 | 104654691 | 104654806 |
| chr4 | 106124511 | 106124616 |

|      |           |           |
|------|-----------|-----------|
| chr4 | 106626321 | 106626546 |
| chr4 | 106662391 | 106662536 |
| chr4 | 114561901 | 114562056 |
| chr4 | 114562121 | 114562266 |
| chr4 | 115388411 | 115388646 |
| chr4 | 115407121 | 115407266 |
| chr4 | 115448571 | 115448736 |
| chr4 | 115499101 | 115499216 |
| chr4 | 115635581 | 115635836 |
| chr4 | 116611501 | 116611636 |
| chr4 | 116751631 | 116751756 |
| chr4 | 117327981 | 117328196 |
| chr4 | 117470971 | 117471076 |
| chr4 | 118013031 | 118013136 |
| chr4 | 119350321 | 119350426 |
| chr4 | 119713951 | 119714106 |
| chr4 | 119730791 | 119730926 |
| chr4 | 119802351 | 119802646 |
| chr4 | 119824001 | 119824106 |
| chr4 | 120213861 | 120214076 |
| chr4 | 122485901 | 122486076 |
| chr4 | 122503131 | 122503236 |
| chr4 | 122833871 | 122834006 |
| chr4 | 123192531 | 123192816 |
| chr4 | 123652541 | 123652696 |
| chr4 | 123900871 | 123900976 |
| chr4 | 123936781 | 123936916 |
| chr4 | 124175551 | 124175696 |
| chr4 | 124250121 | 124250266 |
| chr4 | 124414591 | 124414756 |
| chr4 | 124493681 | 124493936 |
| chr4 | 124665071 | 124665256 |
| chr4 | 124665281 | 124665506 |
| chr4 | 124815721 | 124815946 |
| chr4 | 124922261 | 124922396 |
| chr4 | 124922531 | 124922696 |
| chr4 | 125744341 | 125744726 |
| chr4 | 126104861 | 126105026 |
| chr4 | 126253611 | 126253766 |
| chr4 | 126318411 | 126318536 |
| chr4 | 126701221 | 126701316 |
| chr4 | 126844121 | 126844186 |
| chr4 | 127744011 | 127744166 |
| chr4 | 128346521 | 128346716 |
| chr4 | 128389961 | 128390066 |
| chr4 | 128405371 | 128405576 |
| chr4 | 128463821 | 128463926 |
| chr4 | 128628081 | 128628516 |
| chr4 | 128729801 | 128729966 |
| chr4 | 129548001 | 129548156 |
| chr4 | 129548211 | 129548346 |
| chr4 | 129663881 | 129663986 |
| chr4 | 129666271 | 129666486 |

|      |           |           |
|------|-----------|-----------|
| chr4 | 129801981 | 129802136 |
| chr4 | 130149401 | 130149496 |
| chr4 | 130941751 | 130941906 |
| chr4 | 131093621 | 131093736 |
| chr4 | 131250621 | 131250776 |
| chr4 | 131914611 | 131914746 |
| chr4 | 132322291 | 132322396 |
| chr4 | 132605441 | 132605556 |
| chr4 | 132860081 | 132860216 |
| chr4 | 133170401 | 133170516 |
| chr4 | 133228511 | 133228616 |
| chr4 | 133330631 | 133330736 |
| chr4 | 133401321 | 133401426 |
| chr4 | 133501281 | 133501466 |
| chr4 | 133501531 | 133501626 |
| chr4 | 133650491 | 133650596 |
| chr4 | 133683861 | 133684066 |
| chr4 | 133685461 | 133685596 |
| chr4 | 133727311 | 133727436 |
| chr4 | 134025751 | 134025886 |
| chr4 | 134304581 | 134304876 |
| chr4 | 134305381 | 134305536 |
| chr4 | 134430831 | 134431006 |
| chr4 | 134530761 | 134530876 |
| chr4 | 134669581 | 134669696 |
| chr4 | 134763091 | 134763226 |
| chr4 | 134798491 | 134798636 |
| chr4 | 135353751 | 135353866 |
| chr4 | 135471011 | 135471166 |
| chr4 | 135509721 | 135509866 |
| chr4 | 135510841 | 135510966 |
| chr4 | 136013921 | 136014106 |
| chr4 | 136022051 | 136022136 |
| chr4 | 136037281 | 136037446 |
| chr4 | 136077281 | 136077486 |
| chr4 | 136238241 | 136238426 |
| chr4 | 137146731 | 137146836 |
| chr4 | 137171371 | 137171476 |
| chr4 | 137768111 | 137768216 |
| chr4 | 137794521 | 137794686 |
| chr4 | 138627301 | 138627446 |
| chr4 | 138965651 | 138965776 |
| chr4 | 139025821 | 139025956 |
| chr4 | 139029071 | 139029236 |
| chr4 | 139030741 | 139030896 |
| chr4 | 139034061 | 139034286 |
| chr4 | 139115601 | 139115696 |
| chr4 | 139197811 | 139198076 |
| chr4 | 139300901 | 139301076 |
| chr4 | 139309591 | 139309746 |
| chr4 | 139309971 | 139310096 |
| chr4 | 139343241 | 139343386 |
| chr4 | 139420221 | 139420326 |

|      |           |           |
|------|-----------|-----------|
| chr4 | 139440311 | 139440436 |
| chr4 | 139487471 | 139487616 |
| chr4 | 139652891 | 139653016 |
| chr4 | 139754791 | 139755116 |
| chr4 | 139757721 | 139758176 |
| chr4 | 139813441 | 139813536 |
| chr4 | 139835541 | 139835706 |
| chr4 | 140141251 | 140141406 |
| chr4 | 140177661 | 140177806 |
| chr4 | 140240051 | 140240156 |
| chr4 | 140255651 | 140255796 |
| chr4 | 140372331 | 140372466 |
| chr4 | 140544981 | 140545106 |
| chr4 | 140564521 | 140564586 |
| chr4 | 141146241 | 141146426 |
| chr4 | 141389641 | 141389816 |
| chr4 | 141426461 | 141426686 |
| chr4 | 141451881 | 141452016 |
| chr4 | 141457721 | 141457836 |
| chr4 | 141476341 | 141476456 |
| chr4 | 142555721 | 142555856 |
| chr4 | 142661061 | 142661236 |
| chr4 | 144571641 | 144571786 |
| chr4 | 147002521 | 147002666 |
| chr4 | 147008781 | 147008916 |
| chr4 | 147013321 | 147013426 |
| chr4 | 147013511 | 147013806 |
| chr4 | 147173491 | 147173626 |
| chr4 | 147215231 | 147215336 |
| chr4 | 147331331 | 147331466 |
| chr4 | 147767811 | 147768086 |
| chr4 | 147781131 | 147781276 |
| chr4 | 147781291 | 147781386 |
| chr4 | 147782341 | 147782706 |
| chr4 | 147960661 | 147960776 |
| chr4 | 148004511 | 148004716 |
| chr4 | 148316601 | 148316726 |
| chr4 | 148416521 | 148416626 |
| chr4 | 148540981 | 148541126 |
| chr4 | 148652001 | 148652146 |
| chr4 | 148652301 | 148652436 |
| chr4 | 148754431 | 148754546 |
| chr4 | 148819071 | 148819236 |
| chr4 | 149864591 | 149864706 |
| chr4 | 152245191 | 152245296 |
| chr4 | 153796811 | 153796946 |
| chr4 | 153878221 | 153878366 |
| chr4 | 154496711 | 154496806 |
| chr3 | 10300631  | 10300746  |
| chr3 | 17982651  | 17982816  |
| chr3 | 20082011  | 20082116  |
| chr3 | 27235241  | 27235406  |
| chr3 | 27408471  | 27408736  |

|      |           |           |
|------|-----------|-----------|
| chr3 | 28130571  | 28130696  |
| chr3 | 31395711  | 31395796  |
| chr3 | 35434541  | 35434686  |
| chr3 | 36657071  | 36657186  |
| chr3 | 37761241  | 37761476  |
| chr3 | 37761621  | 37761736  |
| chr3 | 41520371  | 41520486  |
| chr3 | 41628061  | 41628236  |
| chr3 | 51399221  | 51399406  |
| chr3 | 53078341  | 53078446  |
| chr3 | 55503551  | 55503746  |
| chr3 | 70089681  | 70089776  |
| chr3 | 76007071  | 76007256  |
| chr3 | 79520521  | 79520616  |
| chr3 | 79602141  | 79602296  |
| chr3 | 83118931  | 83119066  |
| chr3 | 83295771  | 83295916  |
| chr3 | 83872991  | 83873126  |
| chr3 | 83873781  | 83873916  |
| chr3 | 84057091  | 84057256  |
| chr3 | 84423611  | 84423766  |
| chr3 | 87518021  | 87518176  |
| chr3 | 87635991  | 87636106  |
| chr3 | 87636231  | 87636376  |
| chr3 | 87636611  | 87636756  |
| chr3 | 87895681  | 87895886  |
| chr3 | 88075981  | 88076126  |
| chr3 | 88293131  | 88293306  |
| chr3 | 88293481  | 88293596  |
| chr3 | 88293781  | 88293876  |
| chr3 | 88528481  | 88528556  |
| chr3 | 89218351  | 89218556  |
| chr3 | 89233681  | 89233786  |
| chr3 | 89469021  | 89469136  |
| chr3 | 89471401  | 89471756  |
| chr3 | 89948371  | 89948596  |
| chr3 | 89954431  | 89954596  |
| chr3 | 90310471  | 90310616  |
| chr3 | 94459711  | 94459846  |
| chr3 | 95736921  | 95737036  |
| chr3 | 96074461  | 96074626  |
| chr3 | 96169921  | 96170096  |
| chr3 | 96177441  | 96177606  |
| chr3 | 96770011  | 96770136  |
| chr3 | 97253171  | 97253346  |
| chr3 | 97394981  | 97395176  |
| chr3 | 97397571  | 97397686  |
| chr3 | 97631801  | 97631896  |
| chr3 | 99262471  | 99262626  |
| chr3 | 99392561  | 99392666  |
| chr3 | 101658401 | 101658506 |
| chr3 | 101844041 | 101844136 |
| chr3 | 101877321 | 101877506 |

|      |           |           |
|------|-----------|-----------|
| chr3 | 102287901 | 102287996 |
| chr3 | 102288101 | 102288206 |
| chr3 | 103353671 | 103353796 |
| chr3 | 103499771 | 103499906 |
| chr3 | 104912281 | 104912436 |
| chr3 | 108520491 | 108520756 |
| chr3 | 108641641 | 108641796 |
| chr3 | 122511561 | 122511676 |
| chr3 | 123180821 | 123180916 |
| chr3 | 123278811 | 123278966 |
| chr3 | 126355791 | 126355926 |
| chr3 | 127513241 | 127513386 |
| chr3 | 129195781 | 129195876 |
| chr3 | 129781061 | 129781326 |
| chr3 | 131037401 | 131037576 |
| chr3 | 131054211 | 131054436 |
| chr3 | 131118801 | 131118926 |
| chr3 | 131129111 | 131129216 |
| chr3 | 146353201 | 146353366 |
| chr3 | 154270101 | 154270226 |
| chr2 | 3355231   | 3355396   |
| chr2 | 3576241   | 3576356   |
| chr2 | 4735251   | 4735396   |
| chr2 | 4901551   | 4901666   |
| chr2 | 4932031   | 4932266   |
| chr2 | 6376751   | 6376856   |
| chr2 | 9803291   | 9803426   |
| chr2 | 10126251  | 10126376  |
| chr2 | 11409251  | 11409396  |
| chr2 | 11600781  | 11600886  |
| chr2 | 19219191  | 19219286  |
| chr2 | 20906631  | 20906726  |
| chr2 | 22625911  | 22626146  |
| chr2 | 22726561  | 22726676  |
| chr2 | 24847041  | 24847216  |
| chr2 | 26884211  | 26884306  |
| chr2 | 27243751  | 27243866  |
| chr2 | 27318571  | 27318666  |
| chr2 | 29017471  | 29017776  |
| chr2 | 29339001  | 29339146  |
| chr2 | 29702521  | 29702836  |
| chr2 | 29906781  | 29906896  |
| chr2 | 30220071  | 30220226  |
| chr2 | 30389511  | 30389826  |
| chr2 | 30462301  | 30462396  |
| chr2 | 30807321  | 30807466  |
| chr2 | 31082911  | 31083056  |
| chr2 | 31324671  | 31324786  |
| chr2 | 31645141  | 31645346  |
| chr2 | 31709211  | 31709356  |
| chr2 | 31992261  | 31992426  |
| chr2 | 32556571  | 32556696  |
| chr2 | 32660721  | 32660856  |

|      |           |           |
|------|-----------|-----------|
| chr2 | 32812571  | 32812806  |
| chr2 | 33274331  | 33274496  |
| chr2 | 33366771  | 33366866  |
| chr2 | 33406261  | 33406416  |
| chr2 | 33634691  | 33634796  |
| chr2 | 33789141  | 33789226  |
| chr2 | 34783591  | 34783726  |
| chr2 | 35410521  | 35410676  |
| chr2 | 35665911  | 35666036  |
| chr2 | 35826191  | 35826376  |
| chr2 | 36025101  | 36025246  |
| chr2 | 37557651  | 37557756  |
| chr2 | 37947811  | 37947906  |
| chr2 | 38181191  | 38181456  |
| chr2 | 38190921  | 38191136  |
| chr2 | 38351771  | 38351926  |
| chr2 | 38757011  | 38757136  |
| chr2 | 44910571  | 44910676  |
| chr2 | 57095831  | 57095946  |
| chr2 | 57133581  | 57133696  |
| chr2 | 58745791  | 58745916  |
| chr2 | 59557031  | 59557156  |
| chr2 | 59643681  | 59643906  |
| chr2 | 59827391  | 59827516  |
| chr2 | 61605911  | 61606056  |
| chr2 | 65094971  | 65095076  |
| chr2 | 68178451  | 68178576  |
| chr2 | 68369571  | 68369746  |
| chr2 | 70824101  | 70824256  |
| chr2 | 71598071  | 71598176  |
| chr2 | 72432191  | 72432286  |
| chr2 | 72839221  | 72839326  |
| chr2 | 73065251  | 73065396  |
| chr2 | 74364811  | 74364926  |
| chr2 | 74830321  | 74830446  |
| chr2 | 75553381  | 75553486  |
| chr2 | 75558341  | 75558466  |
| chr2 | 75927681  | 75927846  |
| chr2 | 84563371  | 84563476  |
| chr2 | 84684111  | 84684276  |
| chr2 | 91766311  | 91766436  |
| chr2 | 91941381  | 91941506  |
| chr2 | 92275971  | 92276076  |
| chr2 | 92345381  | 92345566  |
| chr2 | 92402391  | 92402546  |
| chr2 | 92936311  | 92936436  |
| chr2 | 93369931  | 93370056  |
| chr2 | 102400551 | 102400646 |
| chr2 | 104901441 | 104901546 |
| chr2 | 105461871 | 105462026 |
| chr2 | 115712551 | 115712696 |
| chr2 | 116709891 | 116710046 |
| chr2 | 117147461 | 117147606 |

|      |           |           |
|------|-----------|-----------|
| chr2 | 118181701 | 118181846 |
| chr2 | 118389591 | 118389806 |
| chr2 | 119438171 | 119438276 |
| chr2 | 120989341 | 120989516 |
| chr2 | 120989781 | 120989896 |
| chr2 | 121312881 | 121313116 |
| chr2 | 121986341 | 121986496 |
| chr2 | 125422491 | 125422646 |
| chr2 | 125943451 | 125943616 |
| chr2 | 127421211 | 127421376 |
| chr2 | 130329581 | 130329716 |
| chr2 | 130388281 | 130388396 |
| chr2 | 130431571 | 130431736 |
| chr2 | 130752491 | 130752636 |
| chr2 | 130754901 | 130755006 |
| chr2 | 130863411 | 130863536 |
| chr2 | 135395011 | 135395106 |
| chr2 | 138232221 | 138232316 |
| chr2 | 143987051 | 143987166 |
| chr2 | 144000241 | 144000396 |
| chr2 | 146527921 | 146528016 |
| chr2 | 150381641 | 150381766 |
| chr2 | 152067341 | 152067486 |
| chr2 | 152445531 | 152445666 |
| chr2 | 152470291 | 152470396 |
| chr2 | 152602631 | 152602786 |
| chr2 | 153183461 | 153183606 |
| chr2 | 153215231 | 153215376 |
| chr2 | 153250051 | 153250176 |
| chr2 | 153284791 | 153284946 |
| chr2 | 153470431 | 153470586 |
| chr2 | 153497341 | 153497496 |
| chr2 | 154468021 | 154468126 |
| chr2 | 155196451 | 155196636 |
| chr2 | 155320761 | 155320916 |
| chr2 | 155429441 | 155429576 |
| chr2 | 155721431 | 155721566 |
| chr2 | 156171361 | 156171526 |
| chr2 | 156352981 | 156353136 |
| chr2 | 156429501 | 156429656 |
| chr2 | 156631151 | 156631296 |
| chr2 | 157154001 | 157154166 |
| chr2 | 157436941 | 157437026 |
| chr2 | 157448561 | 157448726 |
| chr2 | 157919741 | 157919926 |
| chr2 | 164095511 | 164095656 |
| chr2 | 164117371 | 164117526 |
| chr2 | 164213081 | 164213196 |
| chr2 | 164241701 | 164242046 |
| chr2 | 164788671 | 164788816 |
| chr2 | 164833521 | 164833676 |
| chr2 | 165440071 | 165440326 |
| chr2 | 165460881 | 165461046 |



|      |           |           |
|------|-----------|-----------|
| chr2 | 165476241 | 165476366 |
| chr2 | 165579521 | 165579656 |
| chr2 | 165678521 | 165678616 |
| chr2 | 166094481 | 166094646 |
| chr2 | 166109691 | 166109756 |
| chr2 | 166347231 | 166347326 |
| chr2 | 166383601 | 166383706 |
| chr2 | 166921971 | 166922126 |
| chr2 | 167229831 | 167229956 |
| chr2 | 167280131 | 167280236 |
| chr2 | 167437361 | 167437566 |
| chr2 | 167468131 | 167468276 |
| chr2 | 167818951 | 167819126 |
| chr2 | 167847621 | 167847856 |
| chr2 | 168094401 | 168094566 |
| chr2 | 168272111 | 168272236 |
| chr2 | 168277871 | 168277986 |
| chr2 | 168324221 | 168324386 |
| chr2 | 169794741 | 169794946 |
| chr2 | 169851661 | 169851756 |
| chr2 | 169948991 | 169949096 |
| chr2 | 171737411 | 171737516 |
| chr2 | 172084611 | 172084756 |
| chr2 | 172431871 | 172432056 |
| chr2 | 172555451 | 172555706 |
| chr2 | 172891921 | 172892096 |
| chr2 | 172893661 | 172893756 |
| chr2 | 172943691 | 172943796 |
| chr2 | 173238441 | 173238586 |
| chr2 | 173769511 | 173769606 |
| chr2 | 173898951 | 173899066 |
| chr2 | 174209041 | 174209136 |
| chr2 | 174209521 | 174209646 |
| chr2 | 179648461 | 179648656 |
| chr2 | 180266691 | 180266806 |
| chr2 | 180454051 | 180454256 |
| chr2 | 180457441 | 180457596 |
| chr2 | 180654601 | 180654766 |
| chr2 | 180818771 | 180818956 |
| chr2 | 181085681 | 181085836 |
| chr2 | 181149511 | 181149666 |
| chr1 | 9753851   | 9754016   |
| chr1 | 13371331  | 13371456  |
| chr1 | 13375541  | 13375696  |
| chr1 | 13377101  | 13377226  |
| chr1 | 14493231  | 14493366  |
| chr1 | 14493591  | 14493726  |
| chr1 | 16115371  | 16115526  |
| chr1 | 16279211  | 16279366  |
| chr1 | 19199181  | 19199376  |
| chr1 | 20931661  | 20931806  |
| chr1 | 34060981  | 34061136  |
| chr1 | 34684281  | 34684426  |

|      |          |          |
|------|----------|----------|
| chr1 | 35999341 | 35999446 |
| chr1 | 36512561 | 36512716 |
| chr1 | 37545651 | 37545756 |
| chr1 | 38950351 | 38950506 |
| chr1 | 39583191 | 39583286 |
| chr1 | 42381351 | 42381496 |
| chr1 | 47778521 | 47778616 |
| chr1 | 52271151 | 52271346 |
| chr1 | 55072571 | 55072776 |
| chr1 | 55108761 | 55108866 |
| chr1 | 56695721 | 56695816 |
| chr1 | 57276661 | 57276836 |
| chr1 | 57900941 | 57901076 |
| chr1 | 59108581 | 59108776 |
| chr1 | 59321821 | 59322066 |
| chr1 | 59453381 | 59453626 |
| chr1 | 59765051 | 59765146 |
| chr1 | 64975171 | 64975286 |
| chr1 | 72246301 | 72246476 |
| chr1 | 73874171 | 73874346 |
| chr1 | 73875191 | 73875336 |
| chr1 | 73886071 | 73886346 |
| chr1 | 73899701 | 73899816 |
| chr1 | 74001271 | 74001376 |
| chr1 | 74001641 | 74001786 |
| chr1 | 74025131 | 74025236 |
| chr1 | 74028041 | 74028196 |
| chr1 | 74190251 | 74190376 |
| chr1 | 74320771 | 74320876 |
| chr1 | 74323011 | 74323186 |
| chr1 | 74543801 | 74543906 |
| chr1 | 74707461 | 74707556 |
| chr1 | 74726731 | 74726876 |
| chr1 | 74783531 | 74783716 |
| chr1 | 74827351 | 74827476 |
| chr1 | 74827491 | 74827596 |
| chr1 | 74869761 | 74869936 |
| chr1 | 75271911 | 75272036 |
| chr1 | 75392781 | 75393086 |
| chr1 | 75440971 | 75441106 |
| chr1 | 75660091 | 75660166 |
| chr1 | 77385871 | 77386006 |
| chr1 | 78613491 | 78613706 |
| chr1 | 82166001 | 82166166 |
| chr1 | 88212111 | 88212256 |
| chr1 | 88878191 | 88878296 |
| chr1 | 88897921 | 88898076 |
| chr1 | 88995401 | 88995556 |
| chr1 | 89021621 | 89021726 |
| chr1 | 89088781 | 89088936 |
| chr1 | 89089801 | 89089896 |
| chr1 | 89101881 | 89101976 |
| chr1 | 89103721 | 89103826 |

|      |           |           |
|------|-----------|-----------|
| chr1 | 89490811  | 89490946  |
| chr1 | 91749431  | 91749626  |
| chr1 | 92606441  | 92606586  |
| chr1 | 92788011  | 92788156  |
| chr1 | 93750131  | 93750226  |
| chr1 | 93824241  | 93824436  |
| chr1 | 94529731  | 94529866  |
| chr1 | 107031891 | 107032016 |
| chr1 | 120288391 | 120288616 |
| chr1 | 120905051 | 120905206 |
| chr1 | 121017011 | 121017176 |
| chr1 | 121126321 | 121126596 |
| chr1 | 121346841 | 121346966 |
| chr1 | 128509361 | 128509516 |
| chr1 | 130140991 | 130141206 |
| chr1 | 132722291 | 132722486 |
| chr1 | 133097521 | 133097656 |
| chr1 | 133516101 | 133516206 |
| chr1 | 133980881 | 133981026 |
| chr1 | 134768151 | 134768306 |
| chr1 | 134904851 | 134905056 |
| chr1 | 134911861 | 134912186 |
| chr1 | 135126811 | 135126916 |
| chr1 | 135207881 | 135208026 |
| chr1 | 135561601 | 135561696 |
| chr1 | 135708051 | 135708206 |
| chr1 | 135899791 | 135899956 |
| chr1 | 136005471 | 136005616 |
| chr1 | 136033681 | 136033886 |
| chr1 | 136035961 | 136036096 |
| chr1 | 136849161 | 136849286 |
| chr1 | 136949061 | 136949186 |
| chr1 | 137683331 | 137683446 |
| chr1 | 137990631 | 137990736 |
| chr1 | 138414831 | 138415026 |
| chr1 | 138475911 | 138476006 |
| chr1 | 138511411 | 138511576 |
| chr1 | 138544621 | 138544786 |
| chr1 | 138547221 | 138547396 |
| chr1 | 153598761 | 153598976 |
| chr1 | 154958521 | 154958616 |
| chr1 | 156994861 | 156995006 |
| chr1 | 157590211 | 157590466 |
| chr1 | 158911621 | 158911756 |
| chr1 | 161063391 | 161063516 |
| chr1 | 166121241 | 166121426 |
| chr1 | 166928571 | 166928686 |
| chr1 | 167418691 | 167418886 |
| chr1 | 167962181 | 167962276 |
| chr1 | 169211231 | 169211366 |
| chr1 | 169369251 | 169369376 |
| chr1 | 169472021 | 169472146 |
| chr1 | 169478951 | 169479046 |

|      |           |           |
|------|-----------|-----------|
| chr1 | 169497271 | 169497376 |
| chr1 | 169537221 | 169537326 |
| chr1 | 173088781 | 173088886 |
| chr1 | 173212391 | 173212486 |
| chr1 | 173256501 | 173256606 |
| chr1 | 173889561 | 173889746 |
| chr1 | 174150351 | 174150536 |
| chr1 | 174233771 | 174233926 |
| chr1 | 174369061 | 174369216 |
| chr1 | 179518021 | 179518166 |
| chr1 | 181501591 | 181501696 |
| chr1 | 182071361 | 182071506 |
| chr1 | 182385431 | 182385556 |
| chr1 | 184120191 | 184120316 |
| chr1 | 184588061 | 184588326 |
| chr1 | 184660511 | 184660616 |
| chr1 | 185413651 | 185413766 |
| chr1 | 186189861 | 186190146 |
| chr1 | 186527991 | 186528116 |
| chr1 | 189354361 | 189354456 |
| chr1 | 189881391 | 189881526 |
| chr1 | 191282671 | 191282796 |
| chr1 | 191569041 | 191569146 |
| chr1 | 191707421 | 191707526 |
| chr1 | 191708071 | 191708256 |
| chr1 | 192148761 | 192148896 |
| chr1 | 192959771 | 192959876 |
| chr9 | 9200881   | 9200966   |
| chr9 | 14507761  | 14507886  |
| chr9 | 14717401  | 14717516  |
| chr9 | 20549661  | 20549766  |
| chr9 | 20713611  | 20713766  |
| chr9 | 20765081  | 20765176  |
| chr9 | 20934281  | 20934436  |
| chr9 | 20934451  | 20934606  |
| chr9 | 20936261  | 20936426  |
| chr9 | 20977761  | 20978066  |
| chr9 | 21575831  | 21576006  |
| chr9 | 21598381  | 21598536  |
| chr9 | 21683821  | 21683976  |
| chr9 | 21698021  | 21698116  |
| chr9 | 21742131  | 21742266  |
| chr9 | 24703101  | 24703196  |
| chr9 | 28085021  | 28085176  |
| chr9 | 29582411  | 29582516  |
| chr9 | 30839641  | 30839926  |
| chr9 | 30840101  | 30840196  |
| chr9 | 32435441  | 32435536  |
| chr9 | 34196341  | 34196436  |
| chr9 | 34938521  | 34938666  |
| chr9 | 37235001  | 37235126  |
| chr9 | 37241761  | 37241916  |
| chr9 | 37280151  | 37280246  |

|      |          |          |
|------|----------|----------|
| chr9 | 37289101 | 37289256 |
| chr9 | 37295591 | 37295706 |
| chr9 | 37302631 | 37302736 |
| chr9 | 40126861 | 40126966 |
| chr9 | 40436551 | 40436646 |
| chr9 | 43101241 | 43101406 |
| chr9 | 43192071 | 43192196 |
| chr9 | 43376061 | 43376166 |
| chr9 | 43558691 | 43558806 |
| chr9 | 43596531 | 43596636 |
| chr9 | 43829921 | 43830086 |
| chr9 | 43830091 | 43830256 |
| chr9 | 44251741 | 44251856 |
| chr9 | 44252811 | 44252986 |
| chr9 | 44256911 | 44257086 |
| chr9 | 44439071 | 44439236 |
| chr9 | 44458831 | 44458956 |
| chr9 | 44462481 | 44462596 |
| chr9 | 44869121 | 44869266 |
| chr9 | 44869581 | 44869716 |
| chr9 | 44889001 | 44889146 |
| chr9 | 45022881 | 45022996 |
| chr9 | 45157791 | 45157936 |
| chr9 | 45198731 | 45198836 |
| chr9 | 46087361 | 46087516 |
| chr9 | 46170991 | 46171126 |
| chr9 | 46171151 | 46171246 |
| chr9 | 46308931 | 46309076 |
| chr9 | 48662701 | 48662806 |
| chr9 | 49470721 | 49470896 |
| chr9 | 50182051 | 50182276 |
| chr9 | 50231551 | 50231706 |
| chr9 | 54014751 | 54014906 |
| chr9 | 55344561 | 55344706 |
| chr9 | 56326081 | 56326296 |
| chr9 | 56406671 | 56406746 |
| chr9 | 56667711 | 56667826 |
| chr9 | 57495181 | 57495286 |
| chr9 | 57625291 | 57625476 |
| chr9 | 58562791 | 58562876 |
| chr9 | 58657941 | 58658156 |
| chr9 | 61287441 | 61287546 |
| chr9 | 61498681 | 61498866 |
| chr9 | 62219091 | 62219206 |
| chr9 | 62332911 | 62333036 |
| chr9 | 62339561 | 62339666 |
| chr9 | 62339801 | 62339966 |
| chr9 | 62530901 | 62531066 |
| chr9 | 62650001 | 62650096 |
| chr9 | 64414511 | 64414606 |
| chr9 | 64481461 | 64481606 |
| chr9 | 64892281 | 64892446 |
| chr9 | 65054301 | 65054456 |

|      |           |           |
|------|-----------|-----------|
| chr9 | 65314531  | 65314656  |
| chr9 | 65318211  | 65318386  |
| chr9 | 65391321  | 65391466  |
| chr9 | 65391751  | 65391866  |
| chr9 | 66601161  | 66601396  |
| chr9 | 69033681  | 69033806  |
| chr9 | 69033971  | 69034096  |
| chr9 | 69256991  | 69257116  |
| chr9 | 69643191  | 69643286  |
| chr9 | 70585011  | 70585146  |
| chr9 | 71494551  | 71494706  |
| chr9 | 73455631  | 73455736  |
| chr9 | 74633781  | 74633906  |
| chr9 | 75112981  | 75113106  |
| chr9 | 77563321  | 77563466  |
| chr9 | 77953091  | 77953546  |
| chr9 | 78150571  | 78150686  |
| chr9 | 78150771  | 78150896  |
| chr9 | 78163431  | 78163536  |
| chr9 | 86465801  | 86465896  |
| chr9 | 89667201  | 89667296  |
| chr9 | 94490251  | 94490396  |
| chr9 | 96251371  | 96251476  |
| chr9 | 97151301  | 97151406  |
| chr9 | 98744861  | 98745046  |
| chr9 | 98761381  | 98761496  |
| chr9 | 100196641 | 100196886 |
| chr9 | 102045761 | 102045976 |
| chr9 | 102399321 | 102399486 |
| chr9 | 102568091 | 102568256 |
| chr9 | 103039161 | 103039326 |
| chr9 | 105719341 | 105719436 |
| chr9 | 105826121 | 105826216 |
| chr9 | 106141091 | 106141206 |
| chr9 | 106203411 | 106203646 |
| chr9 | 106316781 | 106316896 |
| chr9 | 106318891 | 106318996 |
| chr9 | 107146871 | 107146976 |
| chr9 | 107227851 | 107228066 |
| chr9 | 107509741 | 107509876 |
| chr9 | 107521641 | 107521756 |
| chr9 | 107544141 | 107544326 |
| chr9 | 107572701 | 107572826 |
| chr9 | 107581031 | 107581196 |
| chr9 | 107782261 | 107782396 |
| chr9 | 107937321 | 107937416 |
| chr9 | 108030321 | 108030456 |
| chr9 | 108666291 | 108666526 |
| chr9 | 108845151 | 108845246 |
| chr9 | 110252381 | 110252516 |
| chr9 | 110571131 | 110571266 |
| chr9 | 110672001 | 110672106 |
| chr9 | 114541151 | 114541446 |

|      |           |           |
|------|-----------|-----------|
| chr9 | 114892161 | 114892266 |
| chr9 | 115205561 | 115205736 |
| chr9 | 118172491 | 118172676 |
| chr9 | 118172701 | 118172886 |
| chr9 | 118238101 | 118238216 |
| chr9 | 118881171 | 118881326 |
| chr9 | 118921991 | 118922256 |
| chr9 | 118932651 | 118932816 |
| chr9 | 119272111 | 119272196 |
| chr9 | 119363501 | 119363646 |
| chr9 | 119414261 | 119414376 |
| chr9 | 119517021 | 119517146 |
| chr9 | 120413751 | 120413866 |
| chr9 | 120521021 | 120521176 |
| chr9 | 120557361 | 120557486 |
| chr9 | 120558161 | 120558276 |
| chr9 | 120878551 | 120878666 |
| chr9 | 121215581 | 121215736 |
| chr9 | 121488381 | 121488526 |
| chr9 | 122186291 | 122186426 |
| chr8 | 3280371   | 3280516   |
| chr8 | 4214741   | 4214826   |
| chr8 | 4249411   | 4249526   |
| chr8 | 4405181   | 4405346   |
| chr8 | 4512361   | 4512496   |
| chr8 | 8649891   | 8650086   |
| chr8 | 10034831  | 10034936  |
| chr8 | 11089451  | 11089546  |
| chr8 | 11244411  | 11244526  |
| chr8 | 11475501  | 11475666  |
| chr8 | 11645681  | 11645936  |
| chr8 | 13037951  | 13038056  |
| chr8 | 13050681  | 13050916  |
| chr8 | 13435131  | 13435256  |
| chr8 | 13562301  | 13562396  |
| chr8 | 14117731  | 14117876  |
| chr8 | 26031781  | 26031966  |
| chr8 | 26789281  | 26789436  |
| chr8 | 26996731  | 26996886  |
| chr8 | 33383551  | 33383696  |
| chr8 | 35586441  | 35586636  |
| chr8 | 36663521  | 36663706  |
| chr8 | 37231141  | 37231306  |
| chr8 | 38007661  | 38007846  |
| chr8 | 38007921  | 38008016  |
| chr8 | 47797841  | 47797976  |
| chr8 | 48221101  | 48221216  |
| chr8 | 67872011  | 67872146  |
| chr8 | 72706321  | 72706396  |
| chr8 | 73028551  | 73028646  |
| chr8 | 73345991  | 73346146  |
| chr8 | 73416371  | 73416466  |
| chr8 | 73431221  | 73431316  |

|      |           |           |
|------|-----------|-----------|
| chr8 | 73790931  | 73791036  |
| chr8 | 74263621  | 74263786  |
| chr8 | 74304671  | 74304756  |
| chr8 | 74488421  | 74488576  |
| chr8 | 74495401  | 74495506  |
| chr8 | 74589561  | 74589656  |
| chr8 | 74610591  | 74610756  |
| chr8 | 74615631  | 74615756  |
| chr8 | 74622801  | 74623026  |
| chr8 | 82282151  | 82282396  |
| chr8 | 86551151  | 86551316  |
| chr8 | 86638101  | 86638246  |
| chr8 | 86662811  | 86662956  |
| chr8 | 86783711  | 86783806  |
| chr8 | 86816471  | 86816656  |
| chr8 | 86889531  | 86889686  |
| chr8 | 87506411  | 87506576  |
| chr8 | 87606161  | 87606266  |
| chr8 | 87613841  | 87614056  |
| chr8 | 87665441  | 87665596  |
| chr8 | 87670351  | 87670516  |
| chr8 | 87690691  | 87690796  |
| chr8 | 87885971  | 87886116  |
| chr8 | 87888151  | 87888276  |
| chr8 | 90776951  | 90777136  |
| chr8 | 90778081  | 90778306  |
| chr8 | 91402681  | 91402806  |
| chr8 | 91456751  | 91456866  |
| chr8 | 91496121  | 91496236  |
| chr8 | 91647701  | 91647866  |
| chr8 | 91669491  | 91669646  |
| chr8 | 94964191  | 94964366  |
| chr8 | 95570791  | 95571046  |
| chr8 | 97583571  | 97583796  |
| chr8 | 98566301  | 98566426  |
| chr8 | 98584211  | 98584426  |
| chr8 | 106994951 | 106995116 |
| chr8 | 107101791 | 107101946 |
| chr8 | 107107581 | 107107706 |
| chr8 | 108160061 | 108160376 |
| chr8 | 108164731 | 108164866 |
| chr8 | 108185071 | 108185226 |
| chr8 | 108361621 | 108361736 |
| chr8 | 108410781 | 108410876 |
| chr8 | 108783341 | 108783476 |
| chr8 | 108856231 | 108856356 |
| chr8 | 111536811 | 111536926 |
| chr8 | 112202031 | 112202226 |
| chr8 | 112844941 | 112845066 |
| chr8 | 114418381 | 114418596 |
| chr8 | 114426631 | 114426786 |
| chr8 | 114452771 | 114452876 |
| chr8 | 116865521 | 116865616 |



|       |           |           |
|-------|-----------|-----------|
| chr8  | 117859311 | 117859446 |
| chr8  | 119903221 | 119903346 |
| chr8  | 120781061 | 120781206 |
| chr8  | 122304911 | 122305036 |
| chr8  | 122323051 | 122323176 |
| chr8  | 122333811 | 122333996 |
| chr8  | 122391371 | 122391586 |
| chr8  | 122783911 | 122784056 |
| chr8  | 123000721 | 123000816 |
| chr8  | 123276731 | 123276866 |
| chr8  | 123313251 | 123313406 |
| chr8  | 123352671 | 123352776 |
| chr8  | 123364521 | 123364616 |
| chr8  | 123417091 | 123417206 |
| chr8  | 123450161 | 123450296 |
| chr8  | 123516261 | 123516396 |
| chr8  | 123972811 | 123973036 |
| chr8  | 124512451 | 124512586 |
| chr8  | 124527501 | 124527646 |
| chr8  | 124551681 | 124551776 |
| chr8  | 125152021 | 125152126 |
| chr8  | 125152881 | 125153156 |
| chr8  | 125155361 | 125155476 |
| chr8  | 125223371 | 125223496 |
| chr8  | 125409021 | 125409096 |
| chr8  | 125557011 | 125557186 |
| chr8  | 125563181 | 125563316 |
| chr8  | 125648891 | 125648986 |
| chr8  | 126166571 | 126166746 |
| chr8  | 126423341 | 126423466 |
| chr8  | 126606901 | 126607036 |
| chr8  | 127084351 | 127084466 |
| chr8  | 127159361 | 127159716 |
| chr8  | 128284561 | 128284686 |
| chr8  | 128789031 | 128789176 |
| chr8  | 128826481 | 128826616 |
| chr13 | 8928211   | 8928336   |
| chr13 | 21482451  | 21482596  |
| chr13 | 37807211  | 37807356  |
| chr13 | 38298021  | 38298096  |
| chr13 | 40472801  | 40472946  |
| chr13 | 42941011  | 42941156  |
| chr13 | 43185911  | 43186016  |
| chr13 | 43432721  | 43432846  |
| chr13 | 46595811  | 46595966  |
| chr13 | 48735951  | 48736086  |
| chr13 | 51016421  | 51016516  |
| chr13 | 51607551  | 51607706  |
| chr13 | 54376531  | 54376676  |
| chr13 | 54802321  | 54802416  |
| chr13 | 54802431  | 54802506  |
| chr13 | 55335471  | 55335576  |
| chr13 | 55494221  | 55494386  |

|       |           |           |
|-------|-----------|-----------|
| chr13 | 58235501  | 58235616  |
| chr13 | 58286261  | 58286406  |
| chr13 | 58462731  | 58462946  |
| chr13 | 59068981  | 59069106  |
| chr13 | 63911171  | 63911296  |
| chr13 | 65252181  | 65252286  |
| chr13 | 69065161  | 69065276  |
| chr13 | 70488041  | 70488186  |
| chr13 | 84187111  | 84187256  |
| chr13 | 94759231  | 94759356  |
| chr13 | 95700711  | 95700916  |
| chr13 | 95768871  | 95769006  |
| chr13 | 96079961  | 96080106  |
| chr13 | 96906641  | 96906756  |
| chr13 | 98431011  | 98431186  |
| chr13 | 99605671  | 99605766  |
| chr13 | 100252811 | 100253076 |
| chr13 | 100455331 | 100455476 |
| chr13 | 103790871 | 103791006 |
| chr13 | 108651561 | 108651656 |
| chr13 | 109161341 | 109161476 |
| chr13 | 114097821 | 114097936 |
| chr13 | 115425681 | 115425806 |
| chr12 | 3825821   | 3825996   |
| chr12 | 3826101   | 3826196   |
| chr12 | 5271371   | 5271476   |
| chr12 | 9076901   | 9077056   |
| chr12 | 12340701  | 12340826  |
| chr12 | 12340961  | 12341056  |
| chr12 | 12678521  | 12678716  |
| chr12 | 12847731  | 12847856  |
| chr12 | 12911961  | 12912066  |
| chr12 | 21536361  | 21536486  |
| chr12 | 25182351  | 25182506  |
| chr12 | 25517321  | 25517456  |
| chr12 | 25853011  | 25853156  |
| chr12 | 31962451  | 31962566  |
| chr12 | 33639031  | 33639176  |
| chr12 | 35607241  | 35607356  |
| chr12 | 55238851  | 55239036  |
| chr12 | 57442311  | 57442426  |
| chr12 | 70642121  | 70642216  |
| chr12 | 71658031  | 71658206  |
| chr12 | 73953791  | 73953886  |
| chr12 | 77786651  | 77786826  |
| chr12 | 77787681  | 77787866  |
| chr12 | 84088631  | 84088796  |
| chr12 | 85244851  | 85244956  |
| chr12 | 85570451  | 85570656  |
| chr12 | 85678821  | 85678966  |
| chr12 | 85682011  | 85682176  |
| chr12 | 86160311  | 86160466  |
| chr12 | 86382801  | 86382946  |

|       |           |           |
|-------|-----------|-----------|
| chr12 | 87170421  | 87170536  |
| chr12 | 87391061  | 87391216  |
| chr12 | 87721081  | 87721216  |
| chr12 | 87725901  | 87726006  |
| chr12 | 87877571  | 87877866  |
| chr12 | 99099881  | 99100026  |
| chr12 | 99787661  | 99787756  |
| chr12 | 99920181  | 99920456  |
| chr12 | 100644431 | 100644576 |
| chr12 | 102294511 | 102294606 |
| chr12 | 104449691 | 104449816 |
| chr12 | 104956311 | 104956486 |
| chr12 | 105221531 | 105221646 |
| chr12 | 105266721 | 105266856 |
| chr12 | 105513401 | 105513556 |
| chr12 | 106646201 | 106646306 |
| chr12 | 106653061 | 106653156 |
| chr12 | 107230451 | 107230696 |
| chr12 | 108206451 | 108206576 |
| chr12 | 108423741 | 108423866 |
| chr12 | 109502101 | 109502246 |
| chr12 | 110066191 | 110066366 |
| chr12 | 111692841 | 111692926 |
| chr12 | 111731451 | 111731626 |
| chr12 | 111854501 | 111854806 |
| chr12 | 111857561 | 111857666 |
| chr12 | 111861371 | 111861486 |
| chr12 | 112736151 | 112736346 |
| chr12 | 112898881 | 112899136 |
| chr12 | 113333451 | 113333606 |
| chr12 | 113385881 | 113385996 |
| chr12 | 113536351 | 113536486 |
| chr12 | 117889411 | 117889526 |
| chr12 | 119004731 | 119004826 |
| chr11 | 3445731   | 3445876   |
| chr11 | 3802221   | 3802396   |
| chr11 | 4124321   | 4124446   |
| chr11 | 4124851   | 4125006   |
| chr11 | 4323301   | 4323416   |
| chr11 | 4341041   | 4341176   |
| chr11 | 4341221   | 4341366   |
| chr11 | 4635511   | 4635616   |
| chr11 | 4661701   | 4661826   |
| chr11 | 4961851   | 4962096   |
| chr11 | 5064541   | 5064706   |
| chr11 | 5079551   | 5079756   |
| chr11 | 5122161   | 5122296   |
| chr11 | 6336651   | 6336836   |
| chr11 | 6414951   | 6415096   |
| chr11 | 6455641   | 6455746   |
| chr11 | 8368691   | 8368786   |
| chr11 | 8476621   | 8476746   |
| chr11 | 8541801   | 8542046   |

|       |          |          |
|-------|----------|----------|
| chr11 | 11584971 | 11585106 |
| chr11 | 16815061 | 16815196 |
| chr11 | 19674131 | 19674286 |
| chr11 | 19849351 | 19849516 |
| chr11 | 20300431 | 20300526 |
| chr11 | 20363251 | 20363346 |
| chr11 | 23962941 | 23963066 |
| chr11 | 28271571 | 28271716 |
| chr11 | 31773151 | 31773276 |
| chr11 | 31882651 | 31882796 |
| chr11 | 32099321 | 32099436 |
| chr11 | 33080891 | 33081046 |
| chr11 | 33095871 | 33096236 |
| chr11 | 33096291 | 33096396 |
| chr11 | 33105321 | 33105486 |
| chr11 | 33973381 | 33973626 |
| chr11 | 34320111 | 34320226 |
| chr11 | 34850831 | 34850966 |
| chr11 | 35259821 | 35259946 |
| chr11 | 45835041 | 45835206 |
| chr11 | 45912241 | 45912366 |
| chr11 | 47120281 | 47120406 |
| chr11 | 48652471 | 48652626 |
| chr11 | 49636721 | 49636876 |
| chr11 | 50557131 | 50557346 |
| chr11 | 51313791 | 51314126 |
| chr11 | 51727291 | 51727406 |
| chr11 | 51742361 | 51742476 |
| chr11 | 52118231 | 52118446 |
| chr11 | 52128761 | 52128906 |
| chr11 | 52128941 | 52129016 |
| chr11 | 52491901 | 52492076 |
| chr11 | 53923891 | 53924076 |
| chr11 | 54779891 | 54779956 |
| chr11 | 54786331 | 54786456 |
| chr11 | 54810121 | 54810226 |
| chr11 | 55180071 | 55180206 |
| chr11 | 55210321 | 55210436 |
| chr11 | 55226931 | 55227056 |
| chr11 | 55281731 | 55281856 |
| chr11 | 57646361 | 57646526 |
| chr11 | 57648921 | 57649086 |
| chr11 | 58810861 | 58811026 |
| chr11 | 59107251 | 59107376 |
| chr11 | 60175581 | 60175696 |
| chr11 | 60294371 | 60294676 |
| chr11 | 61029431 | 61029586 |
| chr11 | 61116941 | 61117136 |
| chr11 | 61529451 | 61529696 |
| chr11 | 61801401 | 61801556 |
| chr11 | 62295601 | 62295746 |
| chr11 | 64824851 | 64824986 |
| chr11 | 67247221 | 67247386 |

|       |          |          |
|-------|----------|----------|
| chr11 | 67285231 | 67285396 |
| chr11 | 68396581 | 68396686 |
| chr11 | 68460571 | 68460696 |
| chr11 | 68461121 | 68461286 |
| chr11 | 68698281 | 68698476 |
| chr11 | 68763211 | 68763356 |
| chr11 | 68763801 | 68763926 |
| chr11 | 68771101 | 68771266 |
| chr11 | 68933271 | 68933366 |
| chr11 | 68973021 | 68973276 |
| chr11 | 69147481 | 69147656 |
| chr11 | 69148351 | 69148616 |
| chr11 | 69221961 | 69222216 |
| chr11 | 69222221 | 69222316 |
| chr11 | 69243481 | 69243626 |
| chr11 | 69383391 | 69383556 |
| chr11 | 69429881 | 69429976 |
| chr11 | 69591291 | 69591446 |
| chr11 | 69610181 | 69610306 |
| chr11 | 70105511 | 70105706 |
| chr11 | 71591361 | 71591606 |
| chr11 | 71845381 | 71845516 |
| chr11 | 71946531 | 71946686 |
| chr11 | 72230281 | 72230456 |
| chr11 | 72383101 | 72383196 |
| chr11 | 72793371 | 72793636 |
| chr11 | 72819951 | 72820076 |
| chr11 | 74343121 | 74343226 |
| chr11 | 74981121 | 74981366 |
| chr11 | 75107821 | 75107986 |
| chr11 | 75410821 | 75410916 |
| chr11 | 75681961 | 75682086 |
| chr11 | 76273031 | 76273186 |
| chr11 | 76284681 | 76284786 |
| chr11 | 76443681 | 76443886 |
| chr11 | 76816021 | 76816126 |
| chr11 | 77440961 | 77441106 |
| chr11 | 77645971 | 77646086 |
| chr11 | 77675511 | 77675686 |
| chr11 | 77750141 | 77750236 |
| chr11 | 77753321 | 77753456 |
| chr11 | 77754221 | 77754366 |
| chr11 | 77780701 | 77780886 |
| chr11 | 78186351 | 78186456 |
| chr11 | 79492131 | 79492226 |
| chr11 | 80774621 | 80774756 |
| chr11 | 81785041 | 81785156 |
| chr11 | 82434941 | 82435056 |
| chr11 | 82515941 | 82516106 |
| chr11 | 82883011 | 82883116 |
| chr11 | 83226811 | 83226906 |
| chr11 | 83226921 | 83227096 |
| chr11 | 84597191 | 84597296 |

|       |          |          |
|-------|----------|----------|
| chr11 | 84610491 | 84610596 |
| chr11 | 85707241 | 85707386 |
| chr11 | 85741491 | 85741616 |
| chr11 | 86228961 | 86229056 |
| chr11 | 87397001 | 87397166 |
| chr11 | 87502641 | 87502766 |
| chr11 | 87582821 | 87583006 |
| chr11 | 87835921 | 87836116 |
| chr11 | 87853611 | 87853886 |
| chr11 | 88165001 | 88165086 |
| chr11 | 88165131 | 88165366 |
| chr11 | 88332361 | 88332486 |
| chr11 | 88636331 | 88636506 |
| chr11 | 88923351 | 88923526 |
| chr11 | 93954461 | 93954856 |
| chr11 | 93955481 | 93955576 |
| chr11 | 93967161 | 93967316 |
| chr11 | 93997091 | 93997216 |
| chr11 | 94058901 | 94059136 |
| chr11 | 94076101 | 94076206 |
| chr11 | 94744991 | 94745116 |
| chr11 | 94836111 | 94836286 |
| chr11 | 94844401 | 94844506 |
| chr11 | 95014401 | 95014466 |
| chr11 | 95014491 | 95014686 |
| chr11 | 95039671 | 95039916 |
| chr11 | 95054701 | 95054936 |
| chr11 | 95426301 | 95426456 |
| chr11 | 95426461 | 95426556 |
| chr11 | 95658141 | 95658346 |
| chr11 | 96011841 | 96012046 |
| chr11 | 96022151 | 96022256 |
| chr11 | 96071621 | 96071726 |
| chr11 | 96121171 | 96121306 |
| chr11 | 96812861 | 96812996 |
| chr11 | 96813921 | 96814026 |
| chr11 | 96829511 | 96829666 |
| chr11 | 96855731 | 96855896 |
| chr11 | 96925201 | 96925326 |
| chr11 | 97228311 | 97228466 |
| chr11 | 97229081 | 97229246 |
| chr11 | 97255031 | 97255216 |
| chr11 | 97257951 | 97258216 |
| chr11 | 97284081 | 97284456 |
| chr11 | 97327421 | 97327546 |
| chr11 | 97494151 | 97494306 |
| chr11 | 97851051 | 97851186 |
| chr11 | 97877091 | 97877196 |
| chr11 | 98134651 | 98134816 |
| chr11 | 98134821 | 98134906 |
| chr11 | 98150271 | 98150406 |
| chr11 | 98396811 | 98396946 |
| chr11 | 98511631 | 98511786 |

|       |           |           |
|-------|-----------|-----------|
| chr11 | 98708131  | 98708376  |
| chr11 | 98742611  | 98742706  |
| chr11 | 98957641  | 98957866  |
| chr11 | 100087241 | 100087416 |
| chr11 | 100209981 | 100210186 |
| chr11 | 100561321 | 100561446 |
| chr11 | 100946161 | 100946266 |
| chr11 | 101697941 | 101698066 |
| chr11 | 101707441 | 101707566 |
| chr11 | 102073451 | 102073666 |
| chr11 | 102163781 | 102163876 |
| chr11 | 102163941 | 102164096 |
| chr11 | 102215881 | 102216026 |
| chr11 | 102448871 | 102449126 |
| chr11 | 102557551 | 102557796 |
| chr11 | 102594381 | 102594536 |
| chr11 | 102594761 | 102594896 |
| chr11 | 102896891 | 102897066 |
| chr11 | 102915191 | 102915366 |
| chr11 | 102994281 | 102994446 |
| chr11 | 103008901 | 103009006 |
| chr11 | 103009461 | 103009606 |
| chr11 | 103041501 | 103041706 |
| chr11 | 103848871 | 103848976 |
| chr11 | 104050221 | 104050366 |
| chr11 | 104459861 | 104460016 |
| chr11 | 104967931 | 104968096 |
| chr11 | 105218651 | 105218746 |
| chr11 | 105729811 | 105729956 |
| chr11 | 106190231 | 106190396 |
| chr11 | 106577871 | 106578016 |
| chr11 | 106957091 | 106957186 |
| chr11 | 107092941 | 107093236 |
| chr11 | 107615851 | 107616036 |
| chr11 | 108791831 | 108791936 |
| chr11 | 109261221 | 109261416 |
| chr11 | 109362661 | 109362776 |
| chr11 | 109436601 | 109436716 |
| chr11 | 109493231 | 109493396 |
| chr11 | 112584011 | 112584176 |
| chr11 | 112589091 | 112589206 |
| chr11 | 112589441 | 112589556 |
| chr11 | 112908531 | 112908706 |
| chr11 | 113522271 | 113522446 |
| chr11 | 113565091 | 113565216 |
| chr11 | 113943741 | 113943856 |
| chr11 | 114008001 | 114008096 |
| chr11 | 114131211 | 114131376 |
| chr11 | 114162381 | 114162496 |
| chr11 | 114260331 | 114260486 |
| chr11 | 114288581 | 114288766 |
| chr11 | 114350951 | 114351166 |
| chr11 | 114653281 | 114653466 |

|       |           |           |
|-------|-----------|-----------|
| chr11 | 114660221 | 114660346 |
| chr11 | 115082471 | 115082596 |
| chr11 | 115279491 | 115279656 |
| chr11 | 115593561 | 115593666 |
| chr11 | 115707931 | 115708066 |
| chr11 | 115924981 | 115925196 |
| chr11 | 115962701 | 115962846 |
| chr11 | 116153511 | 116153676 |
| chr11 | 116245271 | 116245436 |
| chr11 | 116351831 | 116352016 |
| chr11 | 116459901 | 116460176 |
| chr11 | 116473191 | 116473426 |
| chr11 | 116496741 | 116497026 |
| chr11 | 116734611 | 116734746 |
| chr11 | 116810191 | 116810446 |
| chr11 | 116837971 | 116838096 |
| chr11 | 117092411 | 117092496 |
| chr11 | 117218191 | 117218316 |
| chr11 | 117218571 | 117218756 |
| chr11 | 117242271 | 117242376 |
| chr11 | 117427161 | 117427356 |
| chr11 | 117828201 | 117828316 |
| chr11 | 117853991 | 117854156 |
| chr11 | 117854201 | 117854306 |
| chr11 | 117985051 | 117985146 |
| chr11 | 118332521 | 118332766 |
| chr11 | 118425911 | 118426016 |
| chr11 | 118517721 | 118517896 |
| chr11 | 118864831 | 118864946 |
| chr11 | 118883191 | 118883336 |
| chr11 | 118897481 | 118897596 |
| chr11 | 118935081 | 118935256 |
| chr11 | 118944821 | 118944926 |
| chr11 | 118971101 | 118971246 |
| chr11 | 118974401 | 118974586 |
| chr11 | 119030521 | 119030666 |
| chr11 | 119409251 | 119409356 |
| chr11 | 119555721 | 119555876 |
| chr11 | 119724781 | 119724916 |
| chr11 | 119754261 | 119754326 |
| chr11 | 119754351 | 119754466 |
| chr11 | 119926911 | 119927066 |
| chr11 | 120087371 | 120087526 |
| chr11 | 120130861 | 120130986 |
| chr11 | 120326951 | 120327126 |
| chr11 | 120519591 | 120519756 |
| chr11 | 120760051 | 120760206 |
| chr10 | 5636391   | 5636566   |
| chr10 | 7311681   | 7311806   |
| chr10 | 7532421   | 7532526   |
| chr10 | 8606491   | 8606646   |
| chr10 | 13534161  | 13534286  |
| chr10 | 19398201  | 19398356  |



|       |          |          |
|-------|----------|----------|
| chr10 | 19891651 | 19891876 |
| chr10 | 20738251 | 20738456 |
| chr10 | 21199821 | 21199906 |
| chr10 | 21721091 | 21721246 |
| chr10 | 22901621 | 22901766 |
| chr10 | 24448271 | 24448396 |
| chr10 | 25969461 | 25969646 |
| chr10 | 25969691 | 25969786 |
| chr10 | 26578711 | 26578806 |
| chr10 | 37086971 | 37087096 |
| chr10 | 38654931 | 38655026 |
| chr10 | 39214941 | 39215116 |
| chr10 | 39700561 | 39700696 |
| chr10 | 40006701 | 40006826 |
| chr10 | 40528561 | 40528656 |
| chr10 | 40843811 | 40843966 |
| chr10 | 40948641 | 40948786 |
| chr10 | 41153111 | 41153346 |
| chr10 | 41295041 | 41295186 |
| chr10 | 42303991 | 42304216 |
| chr10 | 42318301 | 42318466 |
| chr10 | 42710921 | 42711056 |
| chr10 | 42876491 | 42876646 |
| chr10 | 50593621 | 50593756 |
| chr10 | 52844891 | 52845006 |
| chr10 | 58842581 | 58842696 |
| chr10 | 58842761 | 58842886 |
| chr10 | 59094971 | 59095116 |
| chr10 | 59305681 | 59305846 |
| chr10 | 59307241 | 59307356 |
| chr10 | 59613511 | 59613636 |
| chr10 | 59867221 | 59867366 |
| chr10 | 59931981 | 59932076 |
| chr10 | 60081381 | 60081526 |
| chr10 | 60094381 | 60094496 |
| chr10 | 60094531 | 60094626 |
| chr10 | 60127151 | 60127266 |
| chr10 | 60138491 | 60138586 |
| chr10 | 60196881 | 60197106 |
| chr10 | 60584021 | 60584146 |
| chr10 | 60608321 | 60608436 |
| chr10 | 61647231 | 61647546 |
| chr10 | 62452381 | 62452576 |
| chr10 | 62452661 | 62452816 |
| chr10 | 66378551 | 66378736 |
| chr10 | 66479241 | 66479366 |
| chr10 | 66877861 | 66877956 |
| chr10 | 67031971 | 67032106 |
| chr10 | 67043461 | 67043826 |
| chr10 | 67296881 | 67296976 |
| chr10 | 68989761 | 68989846 |
| chr10 | 69344301 | 69344406 |
| chr10 | 69915111 | 69915236 |

|       |          |          |
|-------|----------|----------|
| chr10 | 70621521 | 70621656 |
| chr10 | 70695471 | 70695556 |
| chr10 | 72487721 | 72487846 |
| chr10 | 74396611 | 74396726 |
| chr10 | 74451711 | 74451826 |
| chr10 | 74617661 | 74617766 |
| chr10 | 74761431 | 74761596 |
| chr10 | 75290241 | 75290496 |
| chr10 | 75342031 | 75342166 |
| chr10 | 75474301 | 75474436 |
| chr10 | 76260411 | 76260556 |
| chr10 | 76460381 | 76460496 |
| chr10 | 76480251 | 76480366 |
| chr10 | 76653201 | 76653296 |
| chr10 | 77445711 | 77445866 |
| chr10 | 77487791 | 77488056 |
| chr10 | 77521331 | 77521426 |
| chr10 | 79200761 | 79200896 |
| chr10 | 79283331 | 79283426 |
| chr10 | 79285371 | 79285516 |
| chr10 | 79394031 | 79394176 |
| chr10 | 79450621 | 79450956 |
| chr10 | 79589791 | 79589896 |
| chr10 | 79597971 | 79598136 |
| chr10 | 79703951 | 79704196 |
| chr10 | 79745011 | 79745156 |
| chr10 | 79867161 | 79867336 |
| chr10 | 79887091 | 79887246 |
| chr10 | 79916451 | 79916646 |
| chr10 | 79917591 | 79917786 |
| chr10 | 79974661 | 79974806 |
| chr10 | 80558941 | 80559036 |
| chr10 | 80661091 | 80661266 |
| chr10 | 80806281 | 80806426 |
| chr10 | 80806551 | 80806676 |
| chr10 | 80827371 | 80827556 |
| chr10 | 80876781 | 80877106 |
| chr10 | 80884831 | 80884966 |
| chr10 | 80990541 | 80990676 |
| chr10 | 82120311 | 82120446 |
| chr10 | 82296341 | 82296476 |
| chr10 | 82490031 | 82490176 |
| chr10 | 82779221 | 82779466 |
| chr10 | 83840021 | 83840166 |
| chr10 | 84088371 | 84088536 |
| chr10 | 84138111 | 84138196 |
| chr10 | 84941301 | 84941436 |
| chr10 | 86192311 | 86192406 |
| chr10 | 87889451 | 87889576 |
| chr10 | 87889851 | 87890486 |
| chr10 | 90264301 | 90264496 |
| chr10 | 98716561 | 98716766 |
| chr10 | 99468131 | 99468276 |

|       |           |           |
|-------|-----------|-----------|
| chr10 | 114730221 | 114730376 |
| chr10 | 115692421 | 115692616 |
| chr10 | 117208991 | 117209136 |
| chr10 | 117212271 | 117212476 |
| chr10 | 119316501 | 119316606 |
| chr10 | 119569291 | 119569376 |
| chr10 | 119778521 | 119778736 |
| chr10 | 120806281 | 120806456 |
| chr10 | 120828251 | 120828356 |
| chr10 | 121945831 | 121945946 |
| chr10 | 125360501 | 125360616 |
| chr10 | 126363451 | 126363546 |
| chr10 | 126375971 | 126376116 |
| chr10 | 126422311 | 126422496 |
| chr10 | 126573741 | 126573956 |
| chr10 | 126588271 | 126588376 |
| chr10 | 126676451 | 126676576 |
| chr10 | 126677611 | 126677896 |
| chr10 | 126919901 | 126920016 |
| chr10 | 127152221 | 127152356 |
| chr10 | 128295821 | 128295916 |
| chr17 | 3410551   | 3410786   |
| chr17 | 5428931   | 5429036   |
| chr17 | 7007861   | 7007986   |
| chr17 | 7055301   | 7055516   |
| chr17 | 8226751   | 8226886   |
| chr17 | 8248791   | 8248946   |
| chr17 | 8364971   | 8365066   |
| chr17 | 8365211   | 8365426   |
| chr17 | 8998551   | 8998706   |
| chr17 | 9569651   | 9569876   |
| chr17 | 12729711  | 12729856  |
| chr17 | 13348841  | 13348996  |
| chr17 | 15553291  | 15553456  |
| chr17 | 23472311  | 23472496  |
| chr17 | 23563881  | 23564066  |
| chr17 | 23693851  | 23693966  |
| chr17 | 23715571  | 23715696  |
| chr17 | 23939531  | 23939636  |
| chr17 | 24126031  | 24126206  |
| chr17 | 24378211  | 24378346  |
| chr17 | 24414291  | 24414406  |
| chr17 | 25146541  | 25146666  |
| chr17 | 25155091  | 25155216  |
| chr17 | 25490301  | 25490406  |
| chr17 | 26148261  | 26148366  |
| chr17 | 26279281  | 26279476  |
| chr17 | 26583421  | 26583546  |
| chr17 | 26677481  | 26677596  |
| chr17 | 26787631  | 26787756  |
| chr17 | 26874631  | 26874776  |
| chr17 | 27029091  | 27029256  |
| chr17 | 27273631  | 27273786  |

|       |          |          |
|-------|----------|----------|
| chr17 | 27373601 | 27373846 |
| chr17 | 27776111 | 27776266 |
| chr17 | 27837481 | 27837676 |
| chr17 | 27841851 | 27841946 |
| chr17 | 27889111 | 27889266 |
| chr17 | 27892541 | 27892636 |
| chr17 | 27955561 | 27955706 |
| chr17 | 28079461 | 28079616 |
| chr17 | 28092601 | 28092876 |
| chr17 | 28302991 | 28303136 |
| chr17 | 28892761 | 28892876 |
| chr17 | 28906121 | 28906276 |
| chr17 | 28916341 | 28916536 |
| chr17 | 29152431 | 29152566 |
| chr17 | 29607101 | 29607436 |
| chr17 | 29930221 | 29930346 |
| chr17 | 30377991 | 30378116 |
| chr17 | 30629121 | 30629276 |
| chr17 | 31026271 | 31026406 |
| chr17 | 32021211 | 32021416 |
| chr17 | 32212641 | 32212736 |
| chr17 | 33362331 | 33362516 |
| chr17 | 33808931 | 33809086 |
| chr17 | 34169351 | 34169486 |
| chr17 | 34269521 | 34269656 |
| chr17 | 34289221 | 34289526 |
| chr17 | 34447671 | 34447926 |
| chr17 | 34447981 | 34448146 |
| chr17 | 34465571 | 34465666 |
| chr17 | 34486371 | 34486506 |
| chr17 | 34669151 | 34669296 |
| chr17 | 34674231 | 34674386 |
| chr17 | 34682251 | 34682336 |
| chr17 | 35141011 | 35141166 |
| chr17 | 35157651 | 35157946 |
| chr17 | 35294141 | 35294276 |
| chr17 | 35852441 | 35852556 |
| chr17 | 36550991 | 36551146 |
| chr17 | 36682491 | 36682596 |
| chr17 | 39452701 | 39452896 |
| chr17 | 42074731 | 42074856 |
| chr17 | 43221751 | 43221936 |
| chr17 | 44958951 | 44959146 |
| chr17 | 45397011 | 45397136 |
| chr17 | 45492451 | 45492566 |
| chr17 | 45950171 | 45950306 |
| chr17 | 46161581 | 46161826 |
| chr17 | 46166071 | 46166366 |
| chr17 | 46782501 | 46782756 |
| chr17 | 47030061 | 47030216 |
| chr17 | 47038021 | 47038156 |
| chr17 | 47283831 | 47283926 |
| chr17 | 47295091 | 47295226 |

|       |          |          |
|-------|----------|----------|
| chr17 | 47338971 | 47339126 |
| chr17 | 47339971 | 47340126 |
| chr17 | 47341731 | 47341846 |
| chr17 | 47352601 | 47352746 |
| chr17 | 47500261 | 47500436 |
| chr17 | 47715191 | 47715356 |
| chr17 | 47816351 | 47816596 |
| chr17 | 48495471 | 48495606 |
| chr17 | 48638291 | 48638436 |
| chr17 | 51304621 | 51304756 |
| chr17 | 53774811 | 53775016 |
| chr17 | 55547701 | 55547846 |
| chr17 | 56554801 | 56554976 |
| chr17 | 56896941 | 56897106 |
| chr17 | 56939511 | 56939776 |
| chr17 | 62370821 | 62370936 |
| chr17 | 68745461 | 68745576 |
| chr17 | 70710851 | 70711016 |
| chr17 | 70821151 | 70821276 |
| chr17 | 71610611 | 71610816 |
| chr17 | 71852341 | 71852436 |
| chr17 | 73096511 | 73096676 |
| chr17 | 78542611 | 78542746 |
| chr17 | 78847901 | 78847996 |
| chr17 | 79877771 | 79877876 |
| chr17 | 80709381 | 80709536 |
| chr17 | 80710091 | 80710206 |
| chr17 | 83156071 | 83156186 |
| chr17 | 83186091 | 83186216 |
| chr17 | 83456031 | 83456286 |
| chr17 | 83607041 | 83607186 |
| chr17 | 83608591 | 83608716 |
| chr17 | 83812091 | 83812246 |
| chr17 | 84036711 | 84036866 |
| chr17 | 84804601 | 84804766 |
| chr17 | 85484581 | 85484726 |
| chr17 | 85600961 | 85601036 |
| chr17 | 85601061 | 85601226 |
| chr17 | 86640471 | 86640586 |
| chr17 | 87101901 | 87102056 |
| chr17 | 87196611 | 87196806 |
| chr17 | 87238431 | 87238756 |
| chr17 | 87277841 | 87277946 |
| chr17 | 87671601 | 87671766 |
| chr17 | 88025711 | 88025876 |
| chr17 | 88283851 | 88283986 |
| chr17 | 90768051 | 90768216 |
| chr16 | 4574081  | 4574276  |
| chr16 | 5408741  | 5408886  |
| chr16 | 5451671  | 5451826  |
| chr16 | 8324831  | 8324946  |
| chr16 | 8370421  | 8370496  |
| chr16 | 10271771 | 10271916 |

|       |          |          |
|-------|----------|----------|
| chr16 | 10701971 | 10702126 |
| chr16 | 10986261 | 10986406 |
| chr16 | 10986591 | 10986766 |
| chr16 | 10986771 | 10986946 |
| chr16 | 11099461 | 11099616 |
| chr16 | 13285581 | 13285726 |
| chr16 | 17035151 | 17035336 |
| chr16 | 17191621 | 17191716 |
| chr16 | 17475851 | 17475966 |
| chr16 | 18509961 | 18510056 |
| chr16 | 18534911 | 18535006 |
| chr16 | 18653031 | 18653226 |
| chr16 | 20520681 | 20520796 |
| chr16 | 20543651 | 20543806 |
| chr16 | 21153021 | 21153116 |
| chr16 | 21213051 | 21213166 |
| chr16 | 21486561 | 21486686 |
| chr16 | 22313701 | 22313886 |
| chr16 | 24090681 | 24090776 |
| chr16 | 29600431 | 29600606 |
| chr16 | 29803051 | 29803336 |
| chr16 | 29974371 | 29974516 |
| chr16 | 30473581 | 30473716 |
| chr16 | 31816901 | 31817046 |
| chr16 | 32084961 | 32085106 |
| chr16 | 32436491 | 32436636 |
| chr16 | 32998611 | 32998766 |
| chr16 | 32998791 | 32998976 |
| chr16 | 33387291 | 33387496 |
| chr16 | 34727171 | 34727356 |
| chr16 | 34856181 | 34856286 |
| chr16 | 34876291 | 34876436 |
| chr16 | 34876671 | 34876806 |
| chr16 | 34877241 | 34877386 |
| chr16 | 35550751 | 35550846 |
| chr16 | 58314081 | 58314196 |
| chr16 | 59428811 | 59428926 |
| chr16 | 76414951 | 76415126 |
| chr16 | 91045461 | 91045626 |
| chr16 | 91045721 | 91045796 |
| chr16 | 92247781 | 92247876 |
| chr16 | 93572891 | 93573026 |
| chr16 | 93674101 | 93674226 |
| chr16 | 93929041 | 93929166 |
| chr16 | 94280451 | 94280606 |
| chr16 | 94853071 | 94853196 |
| chr16 | 95040121 | 95040266 |
| chr16 | 96431151 | 96431266 |
| chr15 | 5092821  | 5092936  |
| chr15 | 7080001  | 7080166  |
| chr15 | 7155651  | 7155826  |
| chr15 | 12305391 | 12305506 |
| chr15 | 12354881 | 12354996 |

|       |          |          |
|-------|----------|----------|
| chr15 | 12741101 | 12741226 |
| chr15 | 12759351 | 12759516 |
| chr15 | 25803131 | 25803226 |
| chr15 | 27430391 | 27430506 |
| chr15 | 36594381 | 36594576 |
| chr15 | 36614961 | 36615076 |
| chr15 | 36632971 | 36633116 |
| chr15 | 36837591 | 36837706 |
| chr15 | 37110961 | 37111076 |
| chr15 | 37187771 | 37187966 |
| chr15 | 38001251 | 38001356 |
| chr15 | 38351201 | 38351396 |
| chr15 | 38505221 | 38505396 |
| chr15 | 39551811 | 39551946 |
| chr15 | 41278741 | 41278946 |
| chr15 | 50699741 | 50699856 |
| chr15 | 57669151 | 57669276 |
| chr15 | 58837031 | 58837206 |
| chr15 | 59464631 | 59464796 |
| chr15 | 59503841 | 59504026 |
| chr15 | 61917661 | 61917776 |
| chr15 | 61928541 | 61928726 |
| chr15 | 73570021 | 73570176 |
| chr15 | 73575261 | 73575346 |
| chr15 | 73619531 | 73619776 |
| chr15 | 74104231 | 74104376 |
| chr15 | 74502961 | 74503086 |
| chr15 | 74506541 | 74506636 |
| chr15 | 75649221 | 75649396 |
| chr15 | 75689571 | 75689776 |
| chr15 | 75837621 | 75837796 |
| chr15 | 76134461 | 76134616 |
| chr15 | 76261211 | 76261376 |
| chr15 | 77141541 | 77141706 |
| chr15 | 77618401 | 77618496 |
| chr15 | 78372091 | 78372266 |
| chr15 | 78418661 | 78418846 |
| chr15 | 78459181 | 78459276 |
| chr15 | 78491991 | 78492106 |
| chr15 | 78510701 | 78510806 |
| chr15 | 78511591 | 78511746 |
| chr15 | 79081751 | 79081846 |
| chr15 | 79262811 | 79262906 |
| chr15 | 79271311 | 79271436 |
| chr15 | 79308791 | 79308896 |
| chr15 | 79603021 | 79603146 |
| chr15 | 79852251 | 79852406 |
| chr15 | 80874991 | 80875136 |
| chr15 | 81773731 | 81773936 |
| chr15 | 81957991 | 81958086 |
| chr15 | 82814521 | 82814656 |
| chr15 | 84000561 | 84000686 |
| chr15 | 84012111 | 84012246 |

|       |           |           |
|-------|-----------|-----------|
| chr15 | 84121521  | 84121626  |
| chr15 | 84241651  | 84241836  |
| chr15 | 84844901  | 84845056  |
| chr15 | 85100801  | 85100996  |
| chr15 | 85978631  | 85978736  |
| chr15 | 88747161  | 88747256  |
| chr15 | 89214941  | 89215116  |
| chr15 | 89288251  | 89288446  |
| chr15 | 89301351  | 89301466  |
| chr15 | 89316391  | 89316566  |
| chr15 | 89316621  | 89316796  |
| chr15 | 91027311  | 91027466  |
| chr15 | 92943841  | 92943976  |
| chr15 | 96014141  | 96014266  |
| chr15 | 96394981  | 96395106  |
| chr15 | 96877991  | 96878106  |
| chr15 | 97197201  | 97197336  |
| chr15 | 97252831  | 97252956  |
| chr15 | 97541631  | 97541786  |
| chr15 | 97589551  | 97589626  |
| chr15 | 97630551  | 97630736  |
| chr15 | 97672651  | 97672806  |
| chr15 | 97827651  | 97827766  |
| chr15 | 97942981  | 97943146  |
| chr15 | 98413481  | 98413576  |
| chr15 | 98413781  | 98413876  |
| chr15 | 98438381  | 98438556  |
| chr15 | 98450511  | 98450606  |
| chr15 | 98468301  | 98468526  |
| chr15 | 98600381  | 98600516  |
| chr15 | 98602061  | 98602476  |
| chr15 | 98631381  | 98631496  |
| chr15 | 98696321  | 98696486  |
| chr15 | 98739501  | 98739656  |
| chr15 | 98836771  | 98836936  |
| chr15 | 98912711  | 98912886  |
| chr15 | 99034101  | 99034256  |
| chr15 | 99329631  | 99329796  |
| chr15 | 99359261  | 99359556  |
| chr15 | 99417231  | 99417496  |
| chr15 | 99541071  | 99541216  |
| chr15 | 99547941  | 99548056  |
| chr15 | 99700601  | 99700796  |
| chr15 | 99913401  | 99913506  |
| chr15 | 100210901 | 100211026 |
| chr15 | 100557741 | 100557836 |
| chr15 | 100559171 | 100559326 |
| chr15 | 100653031 | 100653306 |
| chr15 | 100653421 | 100653626 |
| chr15 | 100882311 | 100882376 |
| chr15 | 100946781 | 100946876 |
| chr15 | 101122571 | 101122666 |
| chr15 | 101179891 | 101180116 |



|       |           |           |
|-------|-----------|-----------|
| chr15 | 101180271 | 101180436 |
| chr15 | 101180981 | 101181096 |
| chr15 | 101381241 | 101381326 |
| chr15 | 101947231 | 101947376 |
| chr15 | 101988751 | 101988926 |
| chr15 | 101990131 | 101990256 |
| chr15 | 102017591 | 102017736 |
| chr15 | 102187211 | 102187336 |
| chr15 | 102190671 | 102190876 |
| chr15 | 102194171 | 102194326 |
| chr15 | 102275131 | 102275226 |
| chr15 | 102776291 | 102776406 |
| chr15 | 103086451 | 103086586 |
| chr14 | 6729051   | 6729206   |
| chr14 | 10463961  | 10464076  |
| chr14 | 12888711  | 12888806  |
| chr14 | 12888901  | 12889026  |
| chr14 | 16426421  | 16426556  |
| chr14 | 19167021  | 19167116  |
| chr14 | 19471671  | 19471786  |
| chr14 | 22824711  | 22824856  |
| chr14 | 24246721  | 24246836  |
| chr14 | 24294971  | 24295086  |
| chr14 | 24349951  | 24350116  |
| chr14 | 24350471  | 24350636  |
| chr14 | 24658281  | 24658386  |
| chr14 | 24700061  | 24700236  |
| chr14 | 25898931  | 25899046  |
| chr14 | 25930561  | 25930676  |
| chr14 | 26884641  | 26884796  |
| chr14 | 27356441  | 27356596  |
| chr14 | 28779921  | 28780056  |
| chr14 | 28963041  | 28963186  |
| chr14 | 29181601  | 29181696  |
| chr14 | 29420051  | 29420146  |
| chr14 | 30857891  | 30857996  |
| chr14 | 31208521  | 31208646  |
| chr14 | 31442371  | 31442516  |
| chr14 | 31562201  | 31562306  |
| chr14 | 31824171  | 31824276  |
| chr14 | 33029931  | 33030066  |
| chr14 | 33473331  | 33473436  |
| chr14 | 35917021  | 35917156  |
| chr14 | 45722651  | 45722766  |
| chr14 | 47006671  | 47006766  |
| chr14 | 47502101  | 47502236  |
| chr14 | 53223181  | 53223296  |
| chr14 | 53431121  | 53431236  |
| chr14 | 53863891  | 53864046  |
| chr14 | 53887161  | 53887336  |
| chr14 | 54016711  | 54016866  |
| chr14 | 54026811  | 54026946  |
| chr14 | 54068111  | 54068256  |

|       |          |          |
|-------|----------|----------|
| chr14 | 54071491 | 54071606 |
| chr14 | 54769671 | 54770006 |
| chr14 | 56661551 | 56661706 |
| chr14 | 58631751 | 58631896 |
| chr14 | 59609971 | 59610086 |
| chr14 | 59693741 | 59693876 |
| chr14 | 59716261 | 59716446 |
| chr14 | 60180481 | 60180586 |
| chr14 | 60562021 | 60562146 |
| chr14 | 61041591 | 61041696 |
| chr14 | 61419201 | 61419416 |
| chr14 | 61580411 | 61580576 |
| chr14 | 62147331 | 62147486 |
| chr14 | 62205511 | 62205826 |
| chr14 | 62224961 | 62225086 |
| chr14 | 62307581 | 62307766 |
| chr14 | 63006811 | 63006966 |
| chr14 | 63306461 | 63306586 |
| chr14 | 63739191 | 63739286 |
| chr14 | 64954891 | 64955146 |
| chr14 | 66141721 | 66141846 |
| chr14 | 66196301 | 66196426 |
| chr14 | 68300121 | 68300296 |
| chr14 | 68564591 | 68564806 |
| chr14 | 68612911 | 68612996 |
| chr14 | 68841791 | 68841946 |
| chr14 | 68938441 | 68938536 |
| chr14 | 69359021 | 69359136 |
| chr14 | 69371891 | 69372016 |
| chr14 | 69511161 | 69511296 |
| chr14 | 69511371 | 69511506 |
| chr19 | 3414511  | 3414646  |
| chr19 | 4146011  | 4146106  |
| chr19 | 4604521  | 4604656  |
| chr19 | 4865281  | 4865456  |
| chr19 | 5052011  | 5052126  |
| chr19 | 5742741  | 5742836  |
| chr19 | 5745791  | 5745926  |
| chr19 | 5756351  | 5756506  |
| chr19 | 6389651  | 6389946  |
| chr19 | 6408141  | 6408286  |
| chr19 | 6413041  | 6413136  |
| chr19 | 6420671  | 6420796  |
| chr19 | 6463521  | 6463646  |
| chr19 | 6495871  | 6495996  |
| chr19 | 6510011  | 6510176  |
| chr19 | 6576811  | 6576906  |
| chr19 | 6886081  | 6886196  |
| chr19 | 6993081  | 6993396  |
| chr19 | 6995391  | 6995526  |
| chr19 | 7001251  | 7001326  |
| chr19 | 7052521  | 7052686  |
| chr19 | 7134981  | 7135096  |

|       |          |          |
|-------|----------|----------|
| chr19 | 7150311  | 7150566  |
| chr19 | 8746141  | 8746376  |
| chr19 | 8746601  | 8746766  |
| chr19 | 9057581  | 9057756  |
| chr19 | 10345581 | 10345716 |
| chr19 | 10362351 | 10362516 |
| chr19 | 10404551 | 10404656 |
| chr19 | 10449171 | 10449316 |
| chr19 | 11604031 | 11604166 |
| chr19 | 24015551 | 24015686 |
| chr19 | 25427181 | 25427326 |
| chr19 | 25474121 | 25474236 |
| chr19 | 25553851 | 25553966 |
| chr19 | 25680981 | 25681076 |
| chr19 | 25689861 | 25689996 |
| chr19 | 28715981 | 28716086 |
| chr19 | 36579831 | 36579926 |
| chr19 | 37083811 | 37083916 |
| chr19 | 37091691 | 37091836 |
| chr19 | 38429111 | 38429266 |
| chr19 | 38496921 | 38497016 |
| chr19 | 40507431 | 40507616 |
| chr19 | 40921621 | 40921756 |
| chr19 | 41702331 | 41702466 |
| chr19 | 41788131 | 41788326 |
| chr19 | 42390431 | 42390576 |
| chr19 | 42464521 | 42464616 |
| chr19 | 42685381 | 42685496 |
| chr19 | 43523071 | 43523196 |
| chr19 | 43558821 | 43558956 |
| chr19 | 44814681 | 44814786 |
| chr19 | 44843901 | 44844216 |
| chr19 | 44878581 | 44878726 |
| chr19 | 44890901 | 44891026 |
| chr19 | 45077431 | 45077676 |
| chr19 | 45082361 | 45082576 |
| chr19 | 45205471 | 45205656 |
| chr19 | 45209191 | 45209456 |
| chr19 | 45212521 | 45212736 |
| chr19 | 45216541 | 45216686 |
| chr19 | 45261081 | 45261186 |
| chr19 | 45261591 | 45261866 |
| chr19 | 45276361 | 45276516 |
| chr19 | 45283581 | 45283696 |
| chr19 | 45325361 | 45325546 |
| chr19 | 45383591 | 45383736 |
| chr19 | 45453881 | 45454036 |
| chr19 | 45620781 | 45620946 |
| chr19 | 45786701 | 45786836 |
| chr19 | 45787041 | 45787156 |
| chr19 | 45790251 | 45790566 |
| chr19 | 45790601 | 45790806 |
| chr19 | 45885341 | 45885486 |

|       |          |          |
|-------|----------|----------|
| chr19 | 46194091 | 46194186 |
| chr19 | 46367621 | 46367736 |
| chr19 | 46370281 | 46370376 |
| chr19 | 46375881 | 46375996 |
| chr19 | 46379391 | 46379616 |
| chr19 | 46525101 | 46525216 |
| chr19 | 46586111 | 46586246 |
| chr19 | 46695101 | 46695226 |
| chr19 | 47100951 | 47101066 |
| chr19 | 47466291 | 47466436 |
| chr19 | 47469661 | 47469806 |
| chr19 | 47490441 | 47490606 |
| chr19 | 47561211 | 47561316 |
| chr19 | 50312971 | 50313136 |
| chr19 | 53309901 | 53310066 |
| chr19 | 56829211 | 56829386 |
| chr19 | 57317911 | 57318026 |
| chr19 | 57687031 | 57687126 |
| chr19 | 58872471 | 58872626 |
| chr19 | 59515571 | 59515706 |
| chr18 | 6504921  | 6505076  |
| chr18 | 9554991  | 9555106  |
| chr18 | 15205061 | 15205196 |
| chr18 | 15544561 | 15544706 |
| chr18 | 25384821 | 25384936 |
| chr18 | 32559201 | 32559376 |
| chr18 | 34243581 | 34243696 |
| chr18 | 38112711 | 38112816 |
| chr18 | 38194741 | 38195036 |
| chr18 | 38200701 | 38200946 |
| chr18 | 38272921 | 38273146 |
| chr18 | 38314901 | 38315056 |
| chr18 | 38339571 | 38339686 |
| chr18 | 38493201 | 38493356 |
| chr18 | 38493371 | 38493496 |
| chr18 | 38788581 | 38788736 |
| chr18 | 47164711 | 47164796 |
| chr18 | 47542791 | 47542896 |
| chr18 | 55156271 | 55156366 |
| chr18 | 56513261 | 56513386 |
| chr18 | 56777451 | 56777586 |
| chr18 | 58792811 | 58792906 |
| chr18 | 60153511 | 60153666 |
| chr18 | 60706971 | 60707076 |
| chr18 | 61040491 | 61040606 |
| chr18 | 61371631 | 61371696 |
| chr18 | 61382441 | 61382526 |
| chr18 | 63100491 | 63100636 |
| chr18 | 65247971 | 65248126 |
| chr18 | 66409911 | 66410066 |
| chr18 | 66416311 | 66416446 |
| chr18 | 66573251 | 66573376 |
| chr18 | 68619261 | 68619456 |

|       |           |           |
|-------|-----------|-----------|
| chr18 | 75137571  | 75137756  |
| chr18 | 75432871  | 75433256  |
| chr18 | 75451761  | 75451916  |
| chr18 | 75469121  | 75469226  |
| chr18 | 75608251  | 75608416  |
| chr18 | 76042091  | 76042256  |
| chr18 | 76186051  | 76186166  |
| chr18 | 76804071  | 76804216  |
| chr18 | 80717251  | 80717396  |
| chr18 | 81354741  | 81354896  |
| chr18 | 81359441  | 81359556  |
| chr18 | 82024111  | 82024226  |
| chr18 | 82620931  | 82621076  |
| chr18 | 82912161  | 82912256  |
| chr18 | 83136241  | 83136376  |
| chr18 | 84972651  | 84972926  |
| chrX  | 7039141   | 7039256   |
| chrX  | 20019901  | 20020016  |
| chrX  | 44315361  | 44315516  |
| chrX  | 54264691  | 54264776  |
| chrX  | 99811201  | 99811296  |
| chrX  | 138310421 | 138310556 |
